# Supplementary material for: Distinct contributions of DNA methylation and histone acetylation to the genomic occupancy of transcription factors
Source: HighWire-hosted journal article supplement (doi:10.1101/gr.257576.119), 2020-09-22
Supplement: Supplemental_Table_S2.xlsx [file Supplemental_Table_S2.xlsx]

## Sheet: Table Legend
Lists of enriched regions for ATAC-seq and ChIP-seq experiments along with differential analyses results and annotations

## Sheet: ATAC-seq
# Enriched regions were identified using the ‘dpeak’ peak-calling algorithm of DANPOS v2.2.2 (Chen et al., 2013) with the options –m, –kd 250, -kw 150 and –p 1e-60.
# Differential analysis performed with DiffBind (Stark and Brown, 2011), Significance was called with a "FDR" value < 0.01 and log2(Fold Change) > 0.58
Chr	Start	End	Conc_TKO.DMSO.vs.J1.DMSO	Conc_J1.DMSO_TKO.DMSO.vs.J1.DMSO	Conc_TKO.DMSO_TKO.DMSO.vs.J1.DMSO	Fold_TKO.DMSO.vs.J1.DMSO	p.value_TKO.DMSO.vs.J1.DMSO	FDR_TKO.DMSO.vs.J1.DMSO	Significant_FDR2_TKO.DMSO.vs.J1.DMSO	ATAC_Status_FDR2_TKO.DMSO.vs.J1.DMSO	Conc_J1.TSA.vs.J1.DMSO	Conc_J1.DMSO_J1.TSA.vs.J1.DMSO	Conc_J1.TSA	Fold_J1.TSA.vs.J1.DMSO	p.value_J1.TSA.vs.J1.DMSO	FDR_J1.TSA.vs.J1.DMSO	Significant_FDR2_J1.TSA.vs.J1.DMSO	ATAC_Status_FDR2_J1.TSA.vs.J1.DMSO	Conc_TKO.TSA.vs.TKO.DMSO	Conc_TKO.DMSO_TKO.TSA.vs.TKO.DMSO	Conc_TKO.TSA_TKO.TSA.vs.TKO.DMSO	Fold_TKO.TSA.vs.TKO.DMSO	p.value_TKO.TSA.vs.TKO.DMSO	FDR_TKO.TSA.vs.TKO.DMSO	Significant_FDR2_TKO.TSA.vs.TKO.DMSO	ATAC_Status_FDR2_TKO.TSA.vs.TKO.DMSO	Conc_TKO.TSA.vs.J1.DMSO	Conc_J1.DMSO	Conc_TKO.TSA_TKO.TSA.vs.J1.DMSO	Fold_TKO.TSA.vs.J1.DMSO	p.value_TKO.TSA.vs.J1.DMSO	FDR_TKO.TSA.vs.J1.DMSO	Significant_FDR2_TKO.TSA.vs.J1.DMSO	ATAC_Status_FDR2_TKO.TSA.vs.J1.DMSO	Annotation	Detailed.Annotation	Distance.to.TSS	Nearest.PromoterID	Gene.Name	CpG.	GC.	RepName	RepType	RepClass	TE_Annotation
chr1	3343650	3344020	5.29	4.94	5.57	-0.63	0.0522	0.138	FALSE	No_SigChange	4.45	4.94	3.7	1.24	0.00351	0.0155	FALSE	No_SigChange	5.24	5.57	4.82	0.75	0.0276	0.0474	FALSE	No_SigChange	4.88	4.94	4.82	0.12	0.733	0.771	FALSE	No_SigChange	intron	MMERVK9C_I-int|LTR|ERVK	327663	NM_001011874	Xkr4	0.01355	0.408108	MMERVK9C_I-int	ERVK	LTR	LTR
chr1	3445710	3445900	4.46	3.04	5.16	-2.12	8.06e-06	0.000115	TRUE	SigIncrease	3.61	3.04	4.02	-0.98	0.112	0.19	FALSE	No_SigChange	4.65	5.16	3.86	1.3	0.102	0.144	FALSE	No_SigChange	3.51	3.04	3.86	-0.82	0.298	0.354	FALSE	No_SigChange	intron	RLTR45|LTR|ERVK	225693	NM_001011874	Xkr4	0.021164	0.484211	RLTR45	ERVK	LTR	LTR
chr1	3482500	3483600	8.27	8.32	8.22	0.1	0.61	0.761	FALSE	No_SigChange	7.68	8.32	6.5	1.81	4.72e-12	1.01e-09	TRUE	SigDecrease	7.45	8.21	5.74	2.47	2.32e-14	1.43e-12	TRUE	SigDecrease	7.54	8.32	5.74	2.58	3.78e-15	1.04e-13	TRUE	SigDecrease	intron	RLTR28B|LTR|ERVL	188448	NM_001011874	Xkr4	0.00182	0.427273	RLTR28B	ERVL	LTR	LTR
chr1	3548920	3549430	6.69	6.66	6.71	-0.06	0.818	0.9	FALSE	No_SigChange	6.31	6.66	5.85	0.81	0.00474	0.0192	FALSE	No_SigChange	6.25	6.71	5.56	1.15	0.000315	0.00109	TRUE	SigDecrease	6.21	6.66	5.56	1.09	0.000693	0.00158	TRUE	SigDecrease	intron	intron (NM_001011874, intron 1 of 2)	122323	NM_001011874	Xkr4	0.021611	0.413725	intron	intron	intron	Other
chr1	3549790	3550130	5.6	5.26	5.87	-0.61	0.0592	0.151	FALSE	No_SigChange	4.82	5.26	4.19	1.07	0.00357	0.0157	FALSE	No_SigChange	5.26	5.87	4.17	1.7	3.88e-05	0.000181	TRUE	SigDecrease	4.81	5.25	4.17	1.09	0.0107	0.0182	FALSE	No_SigChange	intron	RLTR13G|LTR|ERVK	121538	NM_001011874	Xkr4	0.023599	0.385294	RLTR13G	ERVK	LTR	LTR
chr1	3556770	3556960	4.36	1	5.29	-4.29	6.6e-12	6.55e-10	TRUE	SigIncrease	2.04	1	2.64	-1.65	0.108	0.185	FALSE	No_SigChange	4.73	5.28	3.83	1.45	0.00076	0.0023	TRUE	SigDecrease	3.02	1	3.83	-2.83	0.000819	0.00184	TRUE	SigIncrease	intron	RLTR27|LTR|ERVK	114633	NM_001011874	Xkr4	0.031746	0.510526	RLTR27	ERVK	LTR	LTR
chr1	3560500	3560720	4.65	5.26	3.58	1.67	6.16e-05	0.000625	TRUE	SigDecrease	4.36	5.26	1.46	3.8	1.99e-10	2.16e-08	TRUE	SigDecrease	3.37	3.58	3.13	0.45	0.418	0.483	FALSE	No_SigChange	4.55	5.25	3.13	2.13	2.57e-06	1.01e-05	TRUE	SigDecrease	intron	L1_Mur3|LINE|L1	110888	NM_001011874	Xkr4	0.004566	0.468182	L1_Mur3	L1	LINE	LINE
chr1	3649070	3649410	6.33	6.15	6.49	-0.34	0.222	0.395	FALSE	No_SigChange	5.57	6.15	4.58	1.57	1.13e-05	0.000176	TRUE	SigDecrease	5.74	6.49	4.07	2.42	5.19e-14	2.92e-12	TRUE	SigDecrease	5.46	6.15	4.07	2.09	7.95e-08	4.29e-07	TRUE	SigDecrease	intron	intron (NM_001011874, intron 1 of 2)	22258	NM_001011874	Xkr4	0.00295	0.452941	intron	intron	intron	Other
chr1	3670510	3672650	10.31	10.43	10.17	0.26	0.182	0.344	FALSE	No_SigChange	10.19	10.43	9.89	0.54	0.0342	0.0797	FALSE	No_SigChange	9.77	10.17	9.2	0.97	0.00019	0.000709	TRUE	SigDecrease	9.94	10.43	9.2	1.23	6.57e-07	2.92e-06	TRUE	SigDecrease	promoter-TSS	promoter-TSS (NM_001011874)	-82	NM_001011874	Xkr4	0.083216	0.67243	promoter-TSS	promoter-TSS	promoter-TSS	Other
chr1	3681440	3681900	7.02	7.23	6.78	0.45	0.0577	0.148	FALSE	No_SigChange	6.66	7.23	5.7	1.53	1.46e-07	5.06e-06	TRUE	SigDecrease	6.13	6.78	4.93	1.85	1.74e-07	1.64e-06	TRUE	SigDecrease	6.5	7.23	4.93	2.3	5.68e-13	9.6e-12	TRUE	SigDecrease	Intergenic	RLTR9A3|LTR|ERVK	-10172	NM_001011874	Xkr4	0.002179	0.419565	RLTR9A3	ERVK	LTR	LTR
chr1	3912600	3913060	6.07	6.61	5.21	1.4	2.3e-05	0.000275	TRUE	SigDecrease	6.27	6.61	5.83	0.78	0.024	0.0619	FALSE	No_SigChange	4.95	5.21	4.63	0.58	0.13	0.178	FALSE	No_SigChange	5.93	6.6	4.63	1.98	1.03e-07	5.43e-07	TRUE	SigDecrease	Intergenic	RLTR26B_MM|LTR|ERVK	-241332	NM_001011874	Xkr4	0.004357	0.467391	RLTR26B_MM	ERVK	LTR	LTR
chr1	3913640	3913970	5.37	5.81	4.73	1.09	0.000521	0.00362	TRUE	SigDecrease	5.48	5.81	5.04	0.77	0.0139	0.0419	FALSE	No_SigChange	4.23	4.73	3.46	1.27	0.00409	0.00951	TRUE	SigDecrease	5.07	5.81	3.46	2.35	1.52e-10	1.49e-09	TRUE	SigDecrease	Intergenic	Intergenic	-242307	NM_001011874	Xkr4	0	0.475758	Intergenic	Intergenic	Intergenic	Other
chr1	3953790	3954130	5.84	6.4	4.91	1.5	1.39e-07	3.61e-06	TRUE	SigDecrease	5.83	6.4	4.86	1.55	1.57e-07	5.36e-06	TRUE	SigDecrease	4.69	4.9	4.44	0.46	0.217	0.274	FALSE	No_SigChange	5.73	6.4	4.44	1.96	1.25e-09	1.01e-08	TRUE	SigDecrease	Intergenic	Lx2B|LINE|L1	-282462	NM_001011874	Xkr4	0.00295	0.405882	Lx2B	L1	LINE	LINE
chr1	3956230	3956540	5.4	5.67	5.08	0.59	0.0374	0.107	FALSE	No_SigChange	5.25	5.66	4.67	0.99	0.00326	0.0146	FALSE	No_SigChange	4.44	5.07	3.28	1.79	1.07e-05	5.99e-05	TRUE	SigDecrease	4.92	5.66	3.28	2.38	1.4e-09	1.11e-08	TRUE	SigDecrease	Intergenic	L1_Mur2|LINE|L1	-284887	NM_001011874	Xkr4	0.006472	0.506452	L1_Mur2	L1	LINE	LINE
chr1	3994730	3994970	4.9	5.55	3.67	1.88	2.4e-07	5.73e-06	TRUE	SigDecrease	5.45	5.55	5.35	0.2	0.523	0.62	FALSE	No_SigChange	4.08	3.67	4.39	-0.72	0.138	0.186	FALSE	No_SigChange	5.09	5.55	4.39	1.16	0.0039	0.00741	TRUE	SigDecrease	Intergenic	Intergenic	-323352	NM_001011874	Xkr4	0.004184	0.5125	Intergenic	Intergenic	Intergenic	Other
chr1	4142360	4142990	6.09	6.21	5.97	0.24	0.298	0.483	FALSE	No_SigChange	6.07	6.21	5.91	0.3	0.259	0.36	FALSE	No_SigChange	6.09	5.96	6.21	-0.25	0.378	0.443	FALSE	No_SigChange	6.21	6.21	6.21	0	0.996	0.998	FALSE	No_SigChange	Intergenic	Intergenic	217639	NM_011283	Rp1	0.012719	0.460317	Intergenic	Intergenic	Intergenic	Other
chr1	4150700	4151460	6.93	7.16	6.67	0.48	0.0262	0.0813	FALSE	No_SigChange	6.95	7.16	6.7	0.46	0.0833	0.153	FALSE	No_SigChange	6.83	6.67	6.98	-0.31	0.195	0.25	FALSE	No_SigChange	7.07	7.15	6.98	0.17	0.437	0.495	FALSE	No_SigChange	Intergenic	RLTR9D2|LTR|ERVK	209234	NM_011283	Rp1	0.002635	0.477632	RLTR9D2	ERVK	LTR	LTR
chr1	4228120	4228540	5.34	5.46	5.22	0.24	0.462	0.642	FALSE	No_SigChange	5.66	5.46	5.84	-0.38	0.189	0.283	FALSE	No_SigChange	5.07	5.22	4.91	0.31	0.371	0.436	FALSE	No_SigChange	5.21	5.46	4.91	0.55	0.0784	0.108	FALSE	No_SigChange	Intergenic	Intergenic	131984	NM_011283	Rp1	0.009547	0.447619	Intergenic	Intergenic	Intergenic	Other
chr1	4297140	4297340	5.28	5.46	5.08	0.38	0.173	0.332	FALSE	No_SigChange	5.4	5.46	5.34	0.12	0.709	0.78	FALSE	No_SigChange	4.36	5.07	2.86	2.22	1.13e-06	8.42e-06	TRUE	SigDecrease	4.68	5.46	2.86	2.6	3.48e-09	2.53e-08	TRUE	SigDecrease	intron	intron (NM_001195662, intron 3 of 3)	63074	NM_011283	Rp1	0	0.555	intron	intron	intron	Other
chr1	4332500	4332740	5.4	5.59	5.17	0.42	0.156	0.308	FALSE	No_SigChange	5.25	5.59	4.79	0.8	0.013	0.0398	FALSE	No_SigChange	4.97	5.17	4.74	0.43	0.279	0.341	FALSE	No_SigChange	5.23	5.59	4.74	0.85	0.0239	0.0374	FALSE	No_SigChange	intron	intron (NM_001195662, intron 3 of 3)	27694	NM_011283	Rp1	0.008368	0.420833	intron	intron	intron	Other
chr1	4395030	4395290	4.86	5.07	4.61	0.45	0.167	0.323	FALSE	No_SigChange	4.75	5.06	4.36	0.71	0.0874	0.158	FALSE	No_SigChange	4.34	4.61	4	0.61	0.126	0.173	FALSE	No_SigChange	4.63	5.06	4	1.06	0.00367	0.00702	TRUE	SigDecrease	intron	RLTR9F|LTR|ERVK	14081	NM_001195662	Rp1	0.03861	0.492308	RLTR9F	ERVK	LTR	LTR
chr1	4416720	4417140	5.88	5.58	6.13	-0.54	0.0254	0.0793	FALSE	No_SigChange	5.45	5.58	5.29	0.29	0.351	0.455	FALSE	No_SigChange	5.96	6.13	5.78	0.35	0.147	0.197	FALSE	No_SigChange	5.68	5.58	5.78	-0.2	0.468	0.526	FALSE	No_SigChange	Intergenic	Intergenic	-7689	NM_001195662	Rp1	0.011933	0.457143	Intergenic	Intergenic	Intergenic	Other
chr1	4422460	4422620	4.73	4.32	5.04	-0.72	0.0546	0.142	FALSE	No_SigChange	3.83	4.32	3.09	1.23	0.0409	0.0906	FALSE	No_SigChange	4.58	5.04	3.88	1.16	0.00492	0.0111	FALSE	No_SigChange	4.12	4.32	3.88	0.44	0.359	0.417	FALSE	No_SigChange	Intergenic	MTE-int|LTR|ERVL-MaLR	-13299	NM_001195662	Rp1	0.018868	0.48125	MTE-int	ERVL-MaLR	LTR	LTR
chr1	4456520	4457010	4.81	3.17	5.56	-2.39	8.93e-08	2.47e-06	TRUE	SigIncrease	3.66	3.17	4.02	-0.85	0.148	0.234	FALSE	No_SigChange	5.71	5.56	5.85	-0.29	0.335	0.4	FALSE	No_SigChange	5.06	3.17	5.85	-2.68	8.08e-10	6.8e-09	TRUE	SigIncrease	Intergenic	Intergenic	39648	NM_011441	Sox17	0.02045	0.485714	Intergenic	Intergenic	Intergenic	Other
chr1	4479580	4479840	3.99	3.91	4.07	-0.16	0.765	0.868	FALSE	No_SigChange	4.01	3.91	4.11	-0.2	0.671	0.748	FALSE	No_SigChange	3.68	4.06	3.17	0.89	0.115	0.159	FALSE	No_SigChange	3.58	3.9	3.17	0.74	0.19	0.237	FALSE	No_SigChange	Intergenic	Intergenic	16703	NM_011441	Sox17	0.027027	0.488462	Intergenic	Intergenic	Intergenic	Other
chr1	4490640	4490790	4.73	5	4.41	0.59	0.0881	0.203	FALSE	No_SigChange	4.26	5	2.64	2.35	3.83e-05	0.000469	TRUE	SigDecrease	3.95	4.41	3.28	1.12	0.0188	0.0343	FALSE	No_SigChange	4.38	5	3.28	1.71	0.000116	0.000316	TRUE	SigDecrease	TTS	TTS (NM_011441)	5698	NM_011441	Sox17	0.020134	0.513333	TTS	TTS	TTS	Other
chr1	4491650	4493840	10.55	10.6	10.49	0.11	0.556	0.72	FALSE	No_SigChange	10.38	10.6	10.13	0.47	0.0651	0.127	FALSE	No_SigChange	10.14	10.49	9.69	0.8	0.00284	0.00702	TRUE	SigDecrease	10.22	10.6	9.69	0.91	0.000292	0.000729	TRUE	SigDecrease	intron	CpG	3668	NM_011441	Sox17	0.079032	0.647945	CpG	CpG	CpG	Other
chr1	4496090	4498050	8.98	9.4	8.39	1.01	4.86e-06	7.46e-05	TRUE	SigDecrease	9.14	9.4	8.84	0.56	0.0323	0.0765	FALSE	No_SigChange	8.2	8.39	7.97	0.42	0.0799	0.117	FALSE	No_SigChange	8.85	9.4	7.97	1.43	1.25e-07	6.49e-07	TRUE	SigDecrease	promoter-TSS	5' UTR (NM_011441, exon 1 of 5)	-657	NM_011441	Sox17	0.038285	0.531122	5'UTR	5'UTR	5'UTR	Other
chr1	4543960	4544470	6.72	6.45	6.95	-0.5	0.0312	0.0928	FALSE	No_SigChange	6.33	6.45	6.21	0.24	0.441	0.545	FALSE	No_SigChange	6.8	6.95	6.64	0.31	0.261	0.323	FALSE	No_SigChange	6.54	6.44	6.64	-0.19	0.527	0.582	FALSE	No_SigChange	Intergenic	Intergenic	-47802	NM_011441	Sox17	0.011788	0.521569	Intergenic	Intergenic	Intergenic	Other
chr1	4567610	4567790	4.16	2.46	4.92	-2.46	8.58e-07	1.71e-05	TRUE	SigIncrease	2.55	2.46	2.64	-0.19	0.801	0.854	FALSE	No_SigChange	4.85	4.92	4.78	0.14	0.705	0.752	FALSE	No_SigChange	4.04	2.46	4.78	-2.32	7.43e-06	2.64e-05	TRUE	SigIncrease	Intergenic	B3|SINE|B2	-71287	NM_011441	Sox17	0.022346	0.511111	B3	B2	SINE	SINE
chr1	4571360	4572250	8.72	8.64	8.79	-0.15	0.492	0.668	FALSE	No_SigChange	8.38	8.64	8.07	0.57	0.026	0.0655	FALSE	No_SigChange	8.38	8.79	7.81	0.98	0.000403	0.00134	TRUE	SigDecrease	8.28	8.64	7.81	0.83	0.00254	0.00504	TRUE	SigDecrease	Intergenic	CpG	-75392	NM_011441	Sox17	0.067492	0.613483	CpG	CpG	CpG	Other
chr1	4591040	4591390	5.38	5.86	4.64	1.22	0.000148	0.00128	TRUE	SigDecrease	5.47	5.86	4.93	0.93	0.00622	0.0235	FALSE	No_SigChange	4.03	4.64	2.95	1.69	0.00104	0.00299	TRUE	SigDecrease	5.04	5.86	2.95	2.91	5.09e-12	6.95e-11	TRUE	SigDecrease	Intergenic	Intergenic	-94802	NM_011441	Sox17	0.040115	0.557143	Intergenic	Intergenic	Intergenic	Other
chr1	4598520	4598760	4.86	5.15	4.51	0.64	0.121	0.257	FALSE	No_SigChange	5.19	5.15	5.24	-0.09	0.81	0.86	FALSE	No_SigChange	4.58	4.51	4.66	-0.15	0.724	0.768	FALSE	No_SigChange	4.92	5.15	4.66	0.49	0.202	0.251	FALSE	No_SigChange	Intergenic	Intergenic	-102227	NM_011441	Sox17	0.004184	0.479167	Intergenic	Intergenic	Intergenic	Other
chr1	4653940	4654250	4.44	3.29	5.08	-1.79	1.77e-05	0.000221	TRUE	SigIncrease	3.74	3.28	4.09	-0.8	0.117	0.196	FALSE	No_SigChange	4.91	5.07	4.71	0.36	0.308	0.372	FALSE	No_SigChange	4.17	3.28	4.71	-1.43	0.00139	0.00295	TRUE	SigIncrease	Intergenic	Intergenic	131631	NR_033530	Mrpl15	0.016181	0.580645	Intergenic	Intergenic	Intergenic	Other
chr1	4660440	4660670	4.69	4.48	4.88	-0.41	0.248	0.426	FALSE	No_SigChange	4.32	4.47	4.15	0.32	0.509	0.607	FALSE	No_SigChange	4.81	4.88	4.74	0.14	0.695	0.743	FALSE	No_SigChange	4.61	4.47	4.74	-0.27	0.492	0.549	FALSE	No_SigChange	Intergenic	L1VL2|LINE|L1	125171	NR_033530	Mrpl15	0	0.386957	L1VL2	L1	LINE	LINE
chr1	4688180	4689570	7.94	8.16	7.68	0.48	0.0324	0.0956	FALSE	No_SigChange	8.1	8.16	8.04	0.12	0.612	0.698	FALSE	No_SigChange	7.47	7.68	7.23	0.45	0.0857	0.124	FALSE	No_SigChange	7.77	8.16	7.23	0.93	0.00024	0.000611	TRUE	SigDecrease	Intergenic	Intergenic	96851	NR_033530	Mrpl15	0.042477	0.560432	Intergenic	Intergenic	Intergenic	Other
chr1	4766740	4767200	5.7	4.55	6.33	-1.77	1.25e-08	4.64e-07	TRUE	SigIncrease	4.51	4.55	4.46	0.09	0.841	0.884	FALSE	No_SigChange	6	6.32	5.58	0.74	0.00426	0.00985	TRUE	SigDecrease	5.16	4.55	5.58	-1.03	0.00323	0.00625	TRUE	SigIncrease	Intergenic	Intergenic	18756	NR_033530	Mrpl15	0.019608	0.452174	Intergenic	Intergenic	Intergenic	Other
chr1	4767480	4767640	4.52	4.46	4.58	-0.13	0.734	0.847	FALSE	No_SigChange	4.65	4.46	4.82	-0.36	0.363	0.468	FALSE	No_SigChange	3.96	4.58	2.86	1.73	0.000339	0.00116	TRUE	SigDecrease	3.87	4.46	2.86	1.6	0.00173	0.00359	TRUE	SigDecrease	Intergenic	Intergenic	18166	NR_033530	Mrpl15	0.018868	0.4875	Intergenic	Intergenic	Intergenic	Other
chr1	4770030	4770300	5.63	5.54	5.71	-0.18	0.517	0.689	FALSE	No_SigChange	5.43	5.54	5.3	0.23	0.438	0.541	FALSE	No_SigChange	5.21	5.71	4.44	1.27	6.93e-05	0.000298	TRUE	SigDecrease	5.09	5.54	4.44	1.09	0.00109	0.00237	TRUE	SigDecrease	Intergenic	Intergenic	15561	NR_033530	Mrpl15	0.022305	0.455556	Intergenic	Intergenic	Intergenic	Other
chr1	4771030	4771290	4.61	4.11	4.99	-0.88	0.0176	0.06	FALSE	No_SigChange	3.91	4.11	3.67	0.43	0.441	0.545	FALSE	No_SigChange	4.48	4.99	3.7	1.29	0.000738	0.00225	TRUE	SigDecrease	3.92	4.11	3.7	0.41	0.389	0.447	FALSE	No_SigChange	Intergenic	Intergenic	14566	NR_033530	Mrpl15	0.050193	0.488462	Intergenic	Intergenic	Intergenic	Other
chr1	4785220	4786170	8.85	8.85	8.85	0.01	0.971	0.985	FALSE	No_SigChange	8.67	8.85	8.46	0.39	0.0929	0.165	FALSE	No_SigChange	8.66	8.84	8.44	0.4	0.0868	0.125	FALSE	No_SigChange	8.66	8.85	8.44	0.41	0.071	0.0987	FALSE	No_SigChange	promoter-TSS	promoter-TSS (NM_001177658)	31	NR_033530	Mrpl15	0.063224	0.542105	promoter-TSS	promoter-TSS	promoter-TSS	Other
chr1	4788410	4788780	4.58	4.11	4.93	-0.82	0.0376	0.107	FALSE	No_SigChange	4.21	4.11	4.3	-0.2	0.677	0.753	FALSE	No_SigChange	5.34	4.93	5.66	-0.73	0.039	0.0636	FALSE	No_SigChange	5.08	4.11	5.66	-1.55	6.59e-05	0.00019	TRUE	SigIncrease	Intergenic	RLTR1B|LTR|ERV1	-2869	NM_025300	Mrpl15	0.02439	0.483784	RLTR1B	ERV1	LTR	LTR
chr1	4802390	4803520	8.17	7.98	8.34	-0.36	0.0962	0.217	FALSE	No_SigChange	7.65	7.97	7.22	0.75	0.00979	0.0327	FALSE	No_SigChange	7.93	8.33	7.36	0.98	0.000162	0.00062	TRUE	SigDecrease	7.7	7.97	7.36	0.61	0.00767	0.0136	FALSE	No_SigChange	Intergenic	B1_Mus2|SINE|Alu	-4938	NM_008866	Lypla1	0.013286	0.457522	B1_Mus2	Alu	SINE	SINE
chr1	4807430	4808680	9.35	9.33	9.36	-0.03	0.849	0.918	FALSE	No_SigChange	9.08	9.33	8.79	0.54	0.0276	0.0683	FALSE	No_SigChange	9.08	9.36	8.74	0.62	0.0189	0.0345	FALSE	No_SigChange	9.06	9.33	8.74	0.59	0.0185	0.0297	FALSE	No_SigChange	intron	CpG	162	NM_008866	Lypla1	0.081665	0.5752	CpG	CpG	CpG	Other
chr1	4819400	4819840	6.09	5.37	6.57	-1.19	0.0169	0.0582	FALSE	No_SigChange	4.64	5.37	3.09	2.29	0.0346	0.0804	FALSE	No_SigChange	5.84	6.56	4.32	2.24	1.24e-10	2.78e-09	TRUE	SigDecrease	4.94	5.37	4.32	1.05	0.0244	0.038	FALSE	No_SigChange	intron	B1_Mus2|SINE|Alu	11727	NM_008866	Lypla1	0.015945	0.452273	B1_Mus2	Alu	SINE	SINE
chr1	4851700	4852730	7.75	7.56	7.91	-0.36	0.0976	0.219	FALSE	No_SigChange	7.19	7.55	6.69	0.87	0.00369	0.016	FALSE	No_SigChange	7.53	7.91	7.02	0.89	0.00213	0.00551	TRUE	SigDecrease	7.31	7.55	7.02	0.54	0.0573	0.0814	FALSE	No_SigChange	Intergenic	RLTR20B3|LTR|ERVK	-5479	NM_001159750	Tcea1	0.008746	0.447573	RLTR20B3	ERVK	LTR	LTR
chr1	4854930	4856340	8.87	8.45	9.19	-0.74	0.00188	0.0102	FALSE	No_SigChange	8.19	8.45	7.89	0.56	0.0308	0.074	FALSE	No_SigChange	9.15	9.19	9.11	0.08	0.77	0.808	FALSE	No_SigChange	8.82	8.45	9.11	-0.66	0.014	0.0232	FALSE	No_SigChange	Intergenic	Intergenic	-2059	NM_001159750	Tcea1	0.007097	0.432624	Intergenic	Intergenic	Intergenic	Other
chr1	4857170	4858600	9.81	9.74	9.87	-0.14	0.496	0.671	FALSE	No_SigChange	9.53	9.74	9.28	0.45	0.0728	0.138	FALSE	No_SigChange	9.56	9.87	9.15	0.72	0.00473	0.0107	FALSE	No_SigChange	9.47	9.73	9.15	0.58	0.0102	0.0174	FALSE	No_SigChange	promoter-TSS	promoter-TSS (NM_001159751)	191	NM_011541	Tcea1	0.073478	0.567133	promoter-TSS	promoter-TSS	promoter-TSS	Other
chr1	4914550	4914960	6.32	6.13	6.48	-0.35	0.131	0.272	FALSE	No_SigChange	5.83	6.13	5.44	0.69	0.0154	0.0449	FALSE	No_SigChange	6.05	6.48	5.44	1.04	0.000705	0.00216	TRUE	SigDecrease	5.82	6.13	5.44	0.68	0.0328	0.0495	FALSE	No_SigChange	intron	RMER17C2|LTR|ERVK	56427	NM_001159751	Tcea1	0.007335	0.521951	RMER17C2	ERVK	LTR	LTR
chr1	4947380	4947580	5.05	4.79	5.28	-0.48	0.165	0.321	FALSE	No_SigChange	4.58	4.79	4.32	0.47	0.276	0.379	FALSE	No_SigChange	5	5.27	4.67	0.6	0.126	0.172	FALSE	No_SigChange	4.73	4.79	4.67	0.12	0.772	0.806	FALSE	No_SigChange	intron	L1Md_F3|LINE|L1	71946	NM_021374	Rgs20	0.030151	0.575	L1Md_F3	L1	LINE	LINE
chr1	4970330	4971120	7.32	7.48	7.14	0.34	0.16	0.313	FALSE	No_SigChange	7.08	7.48	6.52	0.95	0.00101	0.00607	TRUE	SigDecrease	6.35	7.14	4.49	2.65	0.000767	0.00232	TRUE	SigDecrease	6.65	7.48	4.49	2.99	0.000148	0.000394	TRUE	SigDecrease	intron	intron (NM_001177795, intron 2 of 5)	48701	NM_021374	Rgs20	0.002535	0.44557	intron	intron	intron	Other
chr1	4972410	4972730	6.12	5.91	6.31	-0.4	0.127	0.267	FALSE	No_SigChange	5.04	5.91	2.52	3.38	5.2e-12	1.1e-09	TRUE	SigDecrease	5.49	6.31	3.46	2.85	8.57e-16	7.72e-14	TRUE	SigDecrease	5.15	5.9	3.46	2.45	3.93e-10	3.53e-09	TRUE	SigDecrease	intron	intron (NM_001177795, intron 2 of 5)	46856	NM_021374	Rgs20	0.00627	0.40625	intron	intron	intron	Other
chr1	5015460	5015610	4.62	5.3	3.29	2.02	0.025	0.0783	FALSE	No_SigChange	5.34	5.3	5.37	-0.07	0.914	0.94	FALSE	No_SigChange	2.75	3.28	1.91	1.38	0.132	0.179	FALSE	No_SigChange	4.43	5.3	1.91	3.39	3.76e-08	2.18e-07	TRUE	SigDecrease	intron	intron (NM_001177795, intron 2 of 5)	3891	NM_021374	Rgs20	0	0.406667	intron	intron	intron	Other
chr1	5017870	5021150	10.14	10.36	9.89	0.47	0.0154	0.0542	FALSE	No_SigChange	10.13	10.36	9.87	0.49	0.0458	0.0983	FALSE	No_SigChange	9.5	9.88	8.96	0.92	0.000463	0.00151	TRUE	SigDecrease	9.82	10.36	8.96	1.39	6.12e-08	3.39e-07	TRUE	SigDecrease	promoter-TSS	promoter-TSS (NM_001290372)	-84	NM_021374	Rgs20	0.051235	0.598171	promoter-TSS	promoter-TSS	promoter-TSS	Other
chr1	5022700	5023830	8.48	8.58	8.39	0.19	0.377	0.564	FALSE	No_SigChange	8.35	8.57	8.08	0.49	0.053	0.109	FALSE	No_SigChange	7.82	8.38	6.88	1.51	2.53e-09	3.99e-08	TRUE	SigDecrease	7.96	8.57	6.88	1.7	7.46e-13	1.23e-11	TRUE	SigDecrease	intron	intron (NM_001177795, intron 1 of 5)	-3839	NM_021374	Rgs20	0.038973	0.552212	intron	intron	intron	Other
chr1	5046570	5046740	4.83	5.24	4.27	0.97	0.0136	0.049	FALSE	No_SigChange	4.99	5.24	4.7	0.54	0.188	0.282	FALSE	No_SigChange	5.01	4.26	5.5	-1.23	0.00348	0.00833	TRUE	SigIncrease	5.37	5.24	5.5	-0.26	0.428	0.486	FALSE	No_SigChange	intron	RLTR1B-int|LTR|ERV1	23630	NM_001177795	Rgs20	0.04142	0.641176	RLTR1B-int	ERV1	LTR	LTR
chr1	5070170	5070650	6.53	6.42	6.63	-0.22	0.384	0.57	FALSE	No_SigChange	6.46	6.42	6.5	-0.09	0.76	0.821	FALSE	No_SigChange	6.32	6.63	5.92	0.71	0.0213	0.0381	FALSE	No_SigChange	6.19	6.42	5.92	0.5	0.124	0.162	FALSE	No_SigChange	promoter-TSS	promoter-TSS (NM_001177795)	-125	NM_001177795	Rgs20	0.008351	0.464583	promoter-TSS	promoter-TSS	promoter-TSS	Other
chr1	5082790	5083610	8.57	8.4	8.72	-0.32	0.0932	0.212	FALSE	No_SigChange	8.33	8.4	8.27	0.13	0.595	0.684	FALSE	No_SigChange	8.58	8.72	8.43	0.29	0.221	0.279	FALSE	No_SigChange	8.41	8.4	8.43	-0.03	0.903	0.92	FALSE	No_SigChange	promoter-TSS	promoter-TSS (NM_133826)	27	NM_133826	Atp6v1h	0.072039	0.619512	promoter-TSS	promoter-TSS	promoter-TSS	Other
chr1	5137000	5137350	5.23	4.13	5.85	-1.72	9.73e-06	0.000134	TRUE	SigIncrease	3.98	4.13	3.81	0.32	0.585	0.675	FALSE	No_SigChange	5.48	5.84	4.99	0.86	0.00575	0.0127	FALSE	No_SigChange	4.62	4.13	4.99	-0.86	0.0625	0.0879	FALSE	No_SigChange	intron	B4A|SINE|B4	54002	NM_133826	Atp6v1h	0.005731	0.405714	B4A	B4	SINE	SINE
chr1	5158740	5159130	5.57	5.13	5.91	-0.78	0.00291	0.0145	FALSE	No_SigChange	4.71	5.13	4.13	1	0.00695	0.0255	FALSE	No_SigChange	5.73	5.91	5.52	0.39	0.18	0.234	FALSE	No_SigChange	5.34	5.13	5.52	-0.4	0.222	0.272	FALSE	No_SigChange	intron	RLTR17|LTR|ERVK	75762	NM_133826	Atp6v1h	0.010283	0.461538	RLTR17	ERVK	LTR	LTR
chr1	5183500	5183890	6.36	6.44	6.26	0.18	0.461	0.641	FALSE	No_SigChange	6.23	6.44	5.99	0.45	0.095	0.168	FALSE	No_SigChange	5.96	6.26	5.57	0.69	0.0122	0.0238	FALSE	No_SigChange	6.07	6.44	5.57	0.87	0.000866	0.00193	TRUE	SigDecrease	Intergenic	MTEa|LTR|ERVL-MaLR	100522	NM_133826	Atp6v1h	0.017995	0.502564	MTEa	ERVL-MaLR	LTR	LTR
chr1	5188970	5189180	3.83	4.78	0	4.78	6.4e-09	2.6e-07	TRUE	SigDecrease	4.76	4.78	4.74	0.04	0.914	0.94	FALSE	No_SigChange	2.09	0	2.91	-2.91	0.0045	0.0103	FALSE	No_SigChange	4.13	4.78	2.91	1.87	4.18e-05	0.000126	TRUE	SigDecrease	Intergenic	Intergenic	105902	NM_133826	Atp6v1h	0.004785	0.428571	Intergenic	Intergenic	Intergenic	Other
chr1	5206810	5207220	5.98	5.77	6.16	-0.39	0.166	0.322	FALSE	No_SigChange	5.74	5.77	5.72	0.05	0.877	0.912	FALSE	No_SigChange	6.21	6.16	6.25	-0.09	0.74	0.783	FALSE	No_SigChange	6.03	5.77	6.25	-0.49	0.0784	0.108	FALSE	No_SigChange	Intergenic	RMER13A1|LTR|ERVK	123842	NM_133826	Atp6v1h	0.00489	0.517073	RMER13A1	ERVK	LTR	LTR
chr1	5227530	5228470	7.76	7.69	7.83	-0.14	0.476	0.654	FALSE	No_SigChange	7.23	7.69	6.56	1.13	0.000157	0.00144	TRUE	SigDecrease	7.23	7.83	6.21	1.62	4.75e-09	6.98e-08	TRUE	SigDecrease	7.13	7.69	6.21	1.48	5.14e-08	2.89e-07	TRUE	SigDecrease	Intergenic	RLTR9E|LTR|ERVK	144827	NM_133826	Atp6v1h	0.01278	0.438298	RLTR9E	ERVK	LTR	LTR
chr1	5232790	5233460	7.6	7.6	7.61	-0.01	0.971	0.985	FALSE	No_SigChange	7.45	7.6	7.28	0.32	0.187	0.281	FALSE	No_SigChange	7.23	7.6	6.72	0.89	0.000225	0.000821	TRUE	SigDecrease	7.22	7.6	6.72	0.88	0.000157	0.000416	TRUE	SigDecrease	Intergenic	Intergenic	149952	NM_133826	Atp6v1h	0.001495	0.443284	Intergenic	Intergenic	Intergenic	Other
chr1	5260530	5260930	5.8	5.81	5.78	0.03	0.895	0.944	FALSE	No_SigChange	5.68	5.81	5.53	0.28	0.312	0.416	FALSE	No_SigChange	5.47	5.78	5.07	0.71	0.0487	0.0768	FALSE	No_SigChange	5.49	5.81	5.07	0.75	0.0485	0.0701	FALSE	No_SigChange	Intergenic	MLT1F2|LTR|ERVL-MaLR	177557	NM_133826	Atp6v1h	0.005013	0.4225	MLT1F2	ERVL-MaLR	LTR	LTR
chr1	5261200	5261810	6.77	6.74	6.8	-0.06	0.785	0.88	FALSE	No_SigChange	6.39	6.74	5.92	0.82	0.00284	0.0132	FALSE	No_SigChange	6.46	6.8	6.02	0.78	0.00281	0.00695	TRUE	SigDecrease	6.43	6.74	6.02	0.72	0.00575	0.0105	FALSE	No_SigChange	Intergenic	Intergenic	178332	NM_133826	Atp6v1h	0.003284	0.503279	Intergenic	Intergenic	Intergenic	Other
chr1	5283080	5283900	7.05	7.01	7.09	-0.09	0.68	0.811	FALSE	No_SigChange	6.93	7	6.84	0.16	0.496	0.595	FALSE	No_SigChange	6.63	7.09	5.95	1.14	6.49e-05	0.000282	TRUE	SigDecrease	6.57	7	5.95	1.05	0.000254	0.000643	TRUE	SigDecrease	Intergenic	MERV1_LTR|LTR|ERV1	200317	NM_133826	Atp6v1h	0.010989	0.471951	MERV1_LTR	ERV1	LTR	LTR
chr1	5588140	5589320	8.09	8.29	7.86	0.43	0.0324	0.0957	FALSE	No_SigChange	8.14	8.28	7.99	0.29	0.204	0.3	FALSE	No_SigChange	7.58	7.85	7.25	0.6	0.0147	0.0279	FALSE	No_SigChange	7.86	8.28	7.25	1.03	3.56e-05	0.000109	TRUE	SigDecrease	intron	intron (NM_011011, intron 1 of 3)	237	NM_001204371	Oprk1	0.025445	0.567797	intron	intron	intron	Other
chr1	5778850	5779180	5.34	5.84	4.58	1.25	6.58e-05	0.000659	TRUE	SigDecrease	5.65	5.84	5.43	0.41	0.248	0.349	FALSE	No_SigChange	4.44	4.58	4.28	0.3	0.419	0.484	FALSE	No_SigChange	5.26	5.84	4.28	1.55	3.63e-06	1.38e-05	TRUE	SigDecrease	Intergenic	Lx3C|LINE|L1	138383	NM_010342	Npbwr1	0.00304	0.493939	Lx3C	L1	LINE	LINE
chr1	5915460	5918070	9.08	9.18	8.96	0.22	0.242	0.42	FALSE	No_SigChange	9.06	9.18	8.93	0.25	0.266	0.368	FALSE	No_SigChange	8.76	8.96	8.52	0.43	0.11	0.153	FALSE	No_SigChange	8.89	9.18	8.52	0.66	0.0108	0.0184	FALSE	No_SigChange	exon	exon (NM_010342, exon 1 of 1)	633	NM_010342	Npbwr1	0.044078	0.55977	exon	exon	exon	Other
chr1	5943480	5943830	5.7	5.6	5.79	-0.19	0.445	0.627	FALSE	No_SigChange	5.45	5.6	5.29	0.31	0.368	0.473	FALSE	No_SigChange	5.48	5.79	5.08	0.72	0.0145	0.0276	FALSE	No_SigChange	5.36	5.6	5.08	0.52	0.102	0.137	FALSE	No_SigChange	Intergenic	RMER3D-int|LTR|ERVK	-26257	NM_010342	Npbwr1	0.002865	0.365714	RMER3D-int	ERVK	LTR	LTR
chr1	5992790	5993080	4.33	4.46	4.19	0.27	0.474	0.653	FALSE	No_SigChange	5	4.46	5.4	-0.94	0.00459	0.0188	FALSE	No_SigChange	4.9	4.19	5.37	-1.19	0.000741	0.00226	TRUE	SigIncrease	4.99	4.46	5.37	-0.92	0.0083	0.0145	FALSE	No_SigChange	Intergenic	L1VL2|LINE|L1	-75537	NM_010342	Npbwr1	0	0.393103	L1VL2	L1	LINE	LINE
chr1	6117630	6118020	6.74	6.48	6.97	-0.49	0.0374	0.107	FALSE	No_SigChange	6.41	6.47	6.34	0.13	0.593	0.682	FALSE	No_SigChange	6.84	6.96	6.7	0.26	0.333	0.398	FALSE	No_SigChange	6.59	6.47	6.7	-0.23	0.39	0.448	FALSE	No_SigChange	Intergenic	RLTR20D|LTR|ERVK	-96837	NM_009826	Rb1cc1	0.002571	0.492308	RLTR20D	ERVK	LTR	LTR
chr1	6135110	6135310	5.13	5.22	5.03	0.19	0.54	0.707	FALSE	No_SigChange	5.39	5.22	5.54	-0.32	0.31	0.415	FALSE	No_SigChange	5.07	5.03	5.11	-0.08	0.815	0.847	FALSE	No_SigChange	5.16	5.22	5.11	0.11	0.747	0.784	FALSE	No_SigChange	Intergenic	Intergenic	-79452	NM_009826	Rb1cc1	0.01005	0.4	Intergenic	Intergenic	Intergenic	Other
chr1	6142770	6143500	7.22	7.28	7.15	0.13	0.543	0.71	FALSE	No_SigChange	7.02	7.28	6.7	0.58	0.0407	0.0903	FALSE	No_SigChange	7.12	7.15	7.1	0.05	0.842	0.87	FALSE	No_SigChange	7.19	7.28	7.1	0.18	0.468	0.526	FALSE	No_SigChange	Intergenic	MT2B|LTR|ERVL	-71527	NM_009826	Rb1cc1	0.005487	0.456164	MT2B	ERVL	LTR	LTR
chr1	6152490	6152810	4.93	5.2	4.6	0.6	0.086	0.199	FALSE	No_SigChange	5.47	5.2	5.7	-0.5	0.0897	0.161	FALSE	No_SigChange	4.83	4.6	5.02	-0.42	0.318	0.382	FALSE	No_SigChange	5.11	5.2	5.02	0.18	0.632	0.681	FALSE	No_SigChange	Intergenic	Intergenic	-62012	NM_009826	Rb1cc1	0.00627	0.434375	Intergenic	Intergenic	Intergenic	Other
chr1	6214070	6215530	9.84	9.74	9.94	-0.2	0.315	0.501	FALSE	No_SigChange	9.58	9.74	9.4	0.34	0.139	0.224	FALSE	No_SigChange	9.7	9.93	9.41	0.52	0.0512	0.0801	FALSE	No_SigChange	9.58	9.74	9.41	0.32	0.198	0.246	FALSE	No_SigChange	5'UTR	5' UTR (NM_009826, exon 1 of 24)	138	NM_009826	Rb1cc1	0.086361	0.636986	5'UTR	5'UTR	5'UTR	Other
chr1	6282210	6283210	7.8	7.33	8.15	-0.82	0.000194	0.0016	TRUE	SigIncrease	7.44	7.33	7.54	-0.21	0.447	0.55	FALSE	No_SigChange	7.97	8.15	7.76	0.39	0.17	0.223	FALSE	No_SigChange	7.56	7.33	7.76	-0.43	0.112	0.149	FALSE	No_SigChange	Intergenic	ERVB7_2B-LTR_MM|LTR|ERVK	68048	NM_009826	Rb1cc1	0.015015	0.444	ERVB7_2B-LTR_MM	ERVK	LTR	LTR
chr1	6358850	6359770	8.26	8.25	8.27	-0.03	0.885	0.939	FALSE	No_SigChange	8.1	8.24	7.93	0.31	0.259	0.36	FALSE	No_SigChange	8	8.27	7.67	0.6	0.0135	0.0259	FALSE	No_SigChange	7.99	8.24	7.67	0.57	0.0178	0.0287	FALSE	No_SigChange	promoter-TSS	promoter-TSS (NM_001195732)	-21	NM_001195732	Fam150a	0.043526	0.58913	promoter-TSS	promoter-TSS	promoter-TSS	Other
chr1	6382750	6383530	7.7	7.63	7.77	-0.14	0.498	0.673	FALSE	No_SigChange	7.55	7.62	7.48	0.15	0.555	0.649	FALSE	No_SigChange	7.32	7.76	6.68	1.08	0.000211	0.000773	TRUE	SigDecrease	7.23	7.62	6.68	0.94	0.000627	0.00145	TRUE	SigDecrease	intron	CpG	23809	NM_001195732	Fam150a	0.070603	0.582051	CpG	CpG	CpG	Other
chr1	6406340	6406760	5.89	5.97	5.8	0.17	0.536	0.704	FALSE	No_SigChange	6.01	5.97	6.04	-0.07	0.798	0.851	FALSE	No_SigChange	5.71	5.8	5.62	0.18	0.581	0.639	FALSE	No_SigChange	5.81	5.97	5.62	0.35	0.249	0.302	FALSE	No_SigChange	Intergenic	Intergenic	47219	NM_001195732	Fam150a	0.016706	0.395238	Intergenic	Intergenic	Intergenic	Other
chr1	6410110	6410470	5.46	5.29	5.62	-0.34	0.249	0.428	FALSE	No_SigChange	5.43	5.28	5.56	-0.28	0.396	0.501	FALSE	No_SigChange	5.29	5.62	4.87	0.75	0.0185	0.0339	FALSE	No_SigChange	5.09	5.28	4.87	0.41	0.266	0.32	FALSE	No_SigChange	Intergenic	B3|SINE|B2	50959	NM_001195732	Fam150a	0.013928	0.477778	B3	B2	SINE	SINE
chr1	6441080	6441910	8.07	8.1	8.05	0.05	0.815	0.898	FALSE	No_SigChange	7.99	8.09	7.87	0.22	0.343	0.447	FALSE	No_SigChange	7.72	8.04	7.31	0.73	0.00617	0.0134	FALSE	No_SigChange	7.75	8.09	7.31	0.78	0.00103	0.00224	TRUE	SigDecrease	Intergenic	CpG	-45736	NM_001244692	St18	0.082027	0.626506	CpG	CpG	CpG	Other
chr1	6448830	6449340	6.43	6.23	6.6	-0.37	0.417	0.602	FALSE	No_SigChange	6.12	6.23	6.01	0.23	0.51	0.608	FALSE	No_SigChange	6.51	6.6	6.41	0.18	0.477	0.541	FALSE	No_SigChange	6.32	6.23	6.41	-0.18	0.58	0.632	FALSE	No_SigChange	Intergenic	Intergenic	-38146	NM_001244692	St18	0.003929	0.460784	Intergenic	Intergenic	Intergenic	Other
chr1	6457930	6458340	6.71	6.66	6.76	-0.1	0.66	0.797	FALSE	No_SigChange	6.13	6.66	5.29	1.36	1.9e-07	6.26e-06	TRUE	SigDecrease	6.24	6.76	5.43	1.32	1.07e-06	8.09e-06	TRUE	SigDecrease	6.17	6.66	5.43	1.22	1.8e-06	7.3e-06	TRUE	SigDecrease	Intergenic	Intergenic	-29096	NM_001244692	St18	0.00489	0.44878	Intergenic	Intergenic	Intergenic	Other
chr1	6729320	6729520	5.78	5.41	6.08	-0.67	0.0165	0.057	FALSE	No_SigChange	5.33	5.41	5.26	0.15	0.658	0.737	FALSE	No_SigChange	5.9	6.08	5.69	0.39	0.206	0.263	FALSE	No_SigChange	5.56	5.41	5.69	-0.29	0.392	0.45	FALSE	No_SigChange	promoter-TSS	promoter-TSS (NM_173868)	-631	NR_045188	St18	0.01005	0.505	promoter-TSS	promoter-TSS	promoter-TSS	Other
chr1	6870360	6870750	6.78	7.02	6.49	0.53	0.0239	0.0756	FALSE	No_SigChange	6.53	7.02	5.79	1.22	3.71e-05	0.000457	TRUE	SigDecrease	5.84	6.49	4.66	1.83	2.63e-08	3.14e-07	TRUE	SigDecrease	6.27	7.01	4.66	2.36	8.93e-14	1.81e-12	TRUE	SigDecrease	Intergenic	Intergenic	140504	NM_173868	St18	0.002571	0.487179	Intergenic	Intergenic	Intergenic	Other
chr1	6898100	6898570	6.81	6.88	6.73	0.15	0.464	0.644	FALSE	No_SigChange	6.52	6.88	6.03	0.85	0.00964	0.0323	FALSE	No_SigChange	6.33	6.73	5.77	0.96	0.000461	0.00151	TRUE	SigDecrease	6.43	6.88	5.77	1.11	2.37e-05	7.56e-05	TRUE	SigDecrease	Intergenic	RLTR9D2|LTR|ERVK	168284	NM_173868	St18	0.006397	0.431915	RLTR9D2	ERVK	LTR	LTR
chr1	6916930	6917120	2.73	3	2.39	0.61	0.434	0.617	FALSE	No_SigChange	3.67	3	4.13	-1.13	0.0389	0.0873	FALSE	No_SigChange	2.17	2.39	1.91	0.48	0.58	0.638	FALSE	No_SigChange	2.55	3	1.91	1.09	0.155	0.198	FALSE	No_SigChange	Intergenic	L1Md_A|LINE|L1	-171895	NM_183028	Pcmtd1	0.042328	0.542105	L1Md_A	L1	LINE	LINE
chr1	6997610	6998610	5.43	4.79	5.87	-1.08	0.000518	0.0036	TRUE	SigIncrease	5.6	4.79	6.11	-1.32	9.66e-05	0.000981	TRUE	SigIncrease	6.73	5.87	7.27	-1.4	9.97e-07	7.56e-06	TRUE	SigIncrease	6.5	4.79	7.27	-2.47	2.33e-13	4.3e-12	TRUE	SigIncrease	Intergenic	B2_Mm1t|SINE|B2	-90810	NM_183028	Pcmtd1	0.005005	0.444	B2_Mm1t	B2	SINE	SINE
chr1	7010300	7010920	6.03	6.34	5.63	0.71	0.0059	0.0254	FALSE	No_SigChange	6.25	6.34	6.15	0.19	0.518	0.615	FALSE	No_SigChange	5.45	5.63	5.25	0.38	0.566	0.625	FALSE	No_SigChange	5.9	6.34	5.25	1.09	0.0778	0.107	FALSE	No_SigChange	Intergenic	RMER10A|LTR|ERVL	-78310	NM_183028	Pcmtd1	0.003231	0.45	RMER10A	ERVL	LTR	LTR
chr1	7047170	7047650	6.86	7.05	6.65	0.4	0.091	0.208	FALSE	No_SigChange	6.6	7.05	5.96	1.09	0.000112	0.0011	TRUE	SigDecrease	5.93	6.65	4.43	2.22	8.22e-11	1.93e-09	TRUE	SigDecrease	6.26	7.04	4.43	2.62	4.42e-18	2.31e-16	TRUE	SigDecrease	Intergenic	Intergenic	-41510	NM_183028	Pcmtd1	0.010438	0.408333	Intergenic	Intergenic	Intergenic	Other
chr1	7052390	7052750	6.56	6.89	6.13	0.76	0.00173	0.00953	TRUE	SigDecrease	6.34	6.88	5.44	1.44	4.06e-08	1.79e-06	TRUE	SigDecrease	5.46	6.13	4.17	1.96	2.64e-08	3.14e-07	TRUE	SigDecrease	6.09	6.88	4.17	2.71	8.92e-18	4.31e-16	TRUE	SigDecrease	Intergenic	RMER10A|LTR|ERVL	-36350	NM_183028	Pcmtd1	0.008357	0.486111	RMER10A	ERVL	LTR	LTR
chr1	7055460	7055880	5.39	5.74	4.93	0.81	0.0145	0.0516	FALSE	No_SigChange	5.23	5.74	4.43	1.31	0.000218	0.00186	TRUE	SigDecrease	4.29	4.93	3.13	1.8	0.000138	0.00054	TRUE	SigDecrease	4.96	5.74	3.13	2.61	2.79e-10	2.58e-09	TRUE	SigDecrease	Intergenic	RLTR13E|LTR|ERVK	-33250	NM_183028	Pcmtd1	0.002387	0.433333	RLTR13E	ERVK	LTR	LTR
chr1	7087900	7089420	10.19	10.26	10.12	0.13	0.471	0.65	FALSE	No_SigChange	10.05	10.25	9.81	0.44	0.0555	0.113	FALSE	No_SigChange	9.89	10.12	9.62	0.5	0.0322	0.054	FALSE	No_SigChange	9.97	10.25	9.62	0.63	0.00361	0.0069	TRUE	SigDecrease	promoter-TSS	promoter-TSS (NM_183028)	-260	NM_183028	Pcmtd1	0.063858	0.572368	promoter-TSS	promoter-TSS	promoter-TSS	Other
chr1	7124550	7124710	3.67	3.7	3.64	0.06	0.914	0.955	FALSE	No_SigChange	3	3.7	1.58	2.11	0.00345	0.0153	FALSE	No_SigChange	3.46	3.64	3.25	0.39	0.483	0.546	FALSE	No_SigChange	3.49	3.7	3.25	0.45	0.389	0.447	FALSE	No_SigChange	intron	intron (NM_183028, intron 2 of 5)	35710	NM_183028	Pcmtd1	0	0.40625	intron	intron	intron	Other
chr1	7125790	7126190	5.84	5.42	6.17	-0.75	0.00585	0.0253	FALSE	No_SigChange	4.95	5.42	4.27	1.15	0.000813	0.00513	TRUE	SigDecrease	5.73	6.17	5.1	1.07	0.000657	0.00204	TRUE	SigDecrease	5.27	5.42	5.1	0.32	0.335	0.392	FALSE	No_SigChange	intron	MMERVK9C_I-int|LTR|ERVK	37070	NM_183028	Pcmtd1	0.007519	0.415	MMERVK9C_I-int	ERVK	LTR	LTR
chr1	7129740	7130260	5.85	5.63	6.03	-0.4	0.13	0.271	FALSE	No_SigChange	5.22	5.63	4.66	0.97	0.0055	0.0215	FALSE	No_SigChange	5.79	6.03	5.49	0.54	0.0348	0.0577	FALSE	No_SigChange	5.56	5.63	5.49	0.14	0.66	0.706	FALSE	No_SigChange	intron	RLTR9E|LTR|ERVK	41080	NM_183028	Pcmtd1	0.007707	0.498077	RLTR9E	ERVK	LTR	LTR
chr1	7201610	7202050	5.61	5.59	5.64	-0.04	0.889	0.941	FALSE	No_SigChange	5.8	5.59	5.98	-0.39	0.27	0.372	FALSE	No_SigChange	5.43	5.63	5.19	0.45	0.244	0.304	FALSE	No_SigChange	5.4	5.59	5.19	0.4	0.354	0.411	FALSE	No_SigChange	Intergenic	ERVB7_3-LTR_MM|LTR|ERVK	112910	NM_183028	Pcmtd1	0.01139	0.443182	ERVB7_3-LTR_MM	ERVK	LTR	LTR
chr1	7206200	7207470	7.96	8.18	7.7	0.49	0.021	0.0687	FALSE	No_SigChange	8.03	8.18	7.87	0.31	0.251	0.351	FALSE	No_SigChange	7.54	7.69	7.37	0.32	0.211	0.268	FALSE	No_SigChange	7.83	8.18	7.37	0.81	0.00155	0.00325	TRUE	SigDecrease	Intergenic	Intergenic	117915	NM_183028	Pcmtd1	0.014184	0.527559	Intergenic	Intergenic	Intergenic	Other
chr1	7271420	7271730	5.4	5.26	5.53	-0.27	0.325	0.512	FALSE	No_SigChange	5.53	5.26	5.75	-0.5	0.123	0.205	FALSE	No_SigChange	5.28	5.53	4.98	0.55	0.0653	0.0985	FALSE	No_SigChange	5.12	5.26	4.98	0.28	0.378	0.436	FALSE	No_SigChange	Intergenic	Intergenic	182655	NM_183028	Pcmtd1	0.022654	0.441935	Intergenic	Intergenic	Intergenic	Other
chr1	7312330	7312840	6.24	6.12	6.35	-0.23	0.366	0.553	FALSE	No_SigChange	6.35	6.12	6.55	-0.43	0.117	0.196	FALSE	No_SigChange	6.21	6.35	6.06	0.29	0.294	0.358	FALSE	No_SigChange	6.09	6.12	6.06	0.06	0.834	0.86	FALSE	No_SigChange	Intergenic	ERVB7_2B-LTR_MM|LTR|ERVK	223665	NM_183028	Pcmtd1	0.013752	0.466667	ERVB7_2B-LTR_MM	ERVK	LTR	LTR
chr1	7319200	7319790	6.99	6.93	7.05	-0.13	0.552	0.717	FALSE	No_SigChange	6.22	6.93	4.78	2.15	8.29e-13	2.39e-10	TRUE	SigDecrease	6.18	7.05	3.55	3.5	5.22e-23	2.65e-20	TRUE	SigDecrease	6.06	6.93	3.55	3.37	9.95e-22	1.11e-19	TRUE	SigDecrease	Intergenic	RLTR9A3|LTR|ERVK	230575	NM_183028	Pcmtd1	0.006791	0.428814	RLTR9A3	ERVK	LTR	LTR
chr1	7396810	7398830	10.23	10.22	10.23	-0.02	0.929	0.963	FALSE	No_SigChange	10.19	10.22	10.16	0.06	0.775	0.833	FALSE	No_SigChange	10.11	10.23	9.98	0.25	0.283	0.346	FALSE	No_SigChange	10.1	10.22	9.98	0.23	0.254	0.307	FALSE	No_SigChange	Intergenic	CpG	308900	NM_183028	Pcmtd1	0.046558	0.537624	CpG	CpG	CpG	Other
chr1	7488400	7488660	4.85	4.88	4.81	0.08	0.837	0.912	FALSE	No_SigChange	4.96	4.88	5.03	-0.15	0.689	0.763	FALSE	No_SigChange	4.54	4.8	4.23	0.58	0.147	0.196	FALSE	No_SigChange	4.59	4.88	4.23	0.65	0.114	0.151	FALSE	No_SigChange	Intergenic	L1Md_A|LINE|L1	399610	NM_183028	Pcmtd1	0.034749	0.588462	L1Md_A	L1	LINE	LINE
chr1	7498810	7499450	6.14	6.19	6.09	0.1	0.75	0.857	FALSE	No_SigChange	6.11	6.19	6.03	0.16	0.649	0.73	FALSE	No_SigChange	5.74	6.09	5.29	0.79	0.00605	0.0132	FALSE	No_SigChange	5.81	6.19	5.29	0.89	0.0178	0.0287	FALSE	No_SigChange	Intergenic	Intergenic	410210	NM_183028	Pcmtd1	0.010955	0.454688	Intergenic	Intergenic	Intergenic	Other
chr1	7518570	7519150	6.33	6.26	6.4	-0.14	0.609	0.76	FALSE	No_SigChange	6.3	6.26	6.34	-0.08	0.791	0.846	FALSE	No_SigChange	6.1	6.4	5.71	0.69	0.0189	0.0345	FALSE	No_SigChange	6.01	6.26	5.71	0.54	0.0865	0.118	FALSE	No_SigChange	Intergenic	ERVB7_2-LTR_MM|LTR|ERVK	429940	NM_183028	Pcmtd1	0.020725	0.548276	ERVB7_2-LTR_MM	ERVK	LTR	LTR
chr1	7542750	7542950	4.52	5.09	3.55	1.53	0.00126	0.00739	TRUE	SigDecrease	4.76	5.09	4.34	0.75	0.0944	0.167	FALSE	No_SigChange	2.93	3.55	1.81	1.75	0.0148	0.0281	FALSE	No_SigChange	4.23	5.09	1.81	3.28	3.57e-08	2.08e-07	TRUE	SigDecrease	Intergenic	RLTR16B_MM|LTR|ERVK	453930	NM_183028	Pcmtd1	0	0.46	RLTR16B_MM	ERVK	LTR	LTR
chr1	7543510	7543880	5.32	5.31	5.32	-0.01	0.981	0.99	FALSE	No_SigChange	5.4	5.31	5.48	-0.16	0.668	0.746	FALSE	No_SigChange	5.4	5.32	5.47	-0.16	0.635	0.688	FALSE	No_SigChange	5.39	5.31	5.47	-0.16	0.676	0.72	FALSE	No_SigChange	Intergenic	Intergenic	454775	NM_183028	Pcmtd1	0.00542	0.359459	Intergenic	Intergenic	Intergenic	Other
chr1	7591510	7591670	3.91	4.23	3.49	0.74	0.144	0.291	FALSE	No_SigChange	3.87	4.23	3.39	0.84	0.155	0.243	FALSE	No_SigChange	3.06	3.49	2.46	1.03	0.118	0.163	FALSE	No_SigChange	3.6	4.23	2.46	1.77	0.00628	0.0114	FALSE	No_SigChange	Intergenic	Intergenic	502670	NM_183028	Pcmtd1	0	0.49375	Intergenic	Intergenic	Intergenic	Other
chr1	7671390	7672620	8.54	8.68	8.4	0.28	0.183	0.346	FALSE	No_SigChange	8.44	8.68	8.15	0.52	0.0331	0.0778	FALSE	No_SigChange	8.2	8.39	7.98	0.41	0.114	0.158	FALSE	No_SigChange	8.37	8.68	7.98	0.7	0.00308	0.00599	TRUE	SigDecrease	Intergenic	ERVB7_3-LTR_MM|LTR|ERVK	583085	NM_183028	Pcmtd1	0.006509	0.5	ERVB7_3-LTR_MM	ERVK	LTR	LTR
chr1	7732640	7733150	6.42	6.8	5.9	0.9	0.000178	0.0015	TRUE	SigDecrease	6.14	6.8	4.88	1.92	1.26e-06	2.96e-05	TRUE	SigDecrease	5.18	5.9	3.7	2.2	2.26e-10	4.72e-09	TRUE	SigDecrease	5.96	6.8	3.7	3.1	8.49e-20	6.43e-18	TRUE	SigDecrease	Intergenic	Intergenic	643975	NM_183028	Pcmtd1	0.003929	0.390196	Intergenic	Intergenic	Intergenic	Other
chr1	7777300	7777650	6.21	6.52	5.83	0.69	0.00653	0.0276	FALSE	No_SigChange	6.37	6.52	6.2	0.31	0.209	0.306	FALSE	No_SigChange	5.54	5.82	5.19	0.64	0.256	0.317	FALSE	No_SigChange	6	6.52	5.19	1.33	0.000151	0.000402	TRUE	SigDecrease	Intergenic	RMER17A-int|LTR|ERVK	688555	NM_183028	Pcmtd1	0.020057	0.511429	RMER17A-int	ERVK	LTR	LTR
chr1	8097000	8097330	5.63	5.77	5.46	0.32	0.223	0.396	FALSE	No_SigChange	5.59	5.77	5.37	0.4	0.158	0.247	FALSE	No_SigChange	5.14	5.46	4.74	0.72	0.0335	0.0559	FALSE	No_SigChange	5.35	5.77	4.74	1.03	0.00144	0.00305	TRUE	SigDecrease	Intergenic	RLTR9D|LTR|ERVK	1008245	NM_183028	Pcmtd1	0.006079	0.49697	RLTR9D	ERVK	LTR	LTR
chr1	8468640	8468900	5.32	5.18	5.45	-0.27	0.327	0.514	FALSE	No_SigChange	4.78	5.18	4.23	0.95	0.00826	0.0289	FALSE	No_SigChange	4.91	5.45	4.04	1.41	7.9e-05	0.000334	TRUE	SigDecrease	4.72	5.18	4.04	1.13	0.00319	0.00619	TRUE	SigDecrease	intron	intron (NM_001290390, intron 15 of 20)	830960	NM_027671	Sntg1	0.023166	0.523077	intron	intron	intron	Other
chr1	8476990	8477250	4.11	4.09	4.13	-0.04	0.921	0.959	FALSE	No_SigChange	4.37	4.09	4.61	-0.53	0.204	0.301	FALSE	No_SigChange	4.42	4.13	4.66	-0.53	0.17	0.223	FALSE	No_SigChange	4.4	4.09	4.66	-0.57	0.155	0.197	FALSE	No_SigChange	intron	RMER17A|LTR|ERVK	822610	NM_027671	Sntg1	0.007722	0.526923	RMER17A	ERVK	LTR	LTR
chr1	8496420	8496570	4.71	4.34	5	-0.66	0.0548	0.143	FALSE	No_SigChange	4.15	4.34	3.93	0.41	0.339	0.444	FALSE	No_SigChange	4.64	5	4.17	0.83	0.0257	0.0445	FALSE	No_SigChange	4.26	4.34	4.17	0.17	0.691	0.734	FALSE	No_SigChange	intron	intron (NM_001290390, intron 15 of 20)	803235	NM_027671	Sntg1	0	0.413333	intron	intron	intron	Other
chr1	8533560	8533750	4.97	5.17	4.73	0.44	0.195	0.362	FALSE	No_SigChange	4.64	5.17	3.78	1.39	0.00108	0.00639	TRUE	SigDecrease	4.45	4.73	4.11	0.62	0.12	0.165	FALSE	No_SigChange	4.73	5.17	4.11	1.06	0.0116	0.0196	FALSE	No_SigChange	intron	RLTR13G|LTR|ERVK	766075	NM_027671	Sntg1	0.026455	0.463158	RLTR13G	ERVK	LTR	LTR
chr1	8557810	8557990	4.66	4.86	4.43	0.43	0.245	0.423	FALSE	No_SigChange	4.37	4.86	3.61	1.24	0.00287	0.0133	FALSE	No_SigChange	3.61	4.42	1.58	2.84	5.8e-06	3.52e-05	TRUE	SigDecrease	4	4.86	1.58	3.27	2.36e-08	1.43e-07	TRUE	SigDecrease	intron	RLTR13E|LTR|ERVK	741830	NM_027671	Sntg1	0.005587	0.45	RLTR13E	ERVK	LTR	LTR
chr1	8581810	8582500	6.52	6.51	6.53	-0.02	0.922	0.959	FALSE	No_SigChange	6.03	6.51	5.31	1.19	0.000609	0.0041	TRUE	SigDecrease	6.21	6.53	5.79	0.74	0.00626	0.0136	FALSE	No_SigChange	6.19	6.51	5.79	0.71	0.0177	0.0286	FALSE	No_SigChange	intron	RLTR13D6|LTR|ERVK	717575	NM_027671	Sntg1	0.01016	0.4	RLTR13D6	ERVK	LTR	LTR
chr1	8859190	8859700	5.57	4.99	5.98	-0.99	0.00105	0.00635	TRUE	SigIncrease	4.99	4.99	4.99	0	0.997	0.999	FALSE	No_SigChange	6.09	5.98	6.19	-0.21	0.457	0.521	FALSE	No_SigChange	5.71	4.99	6.19	-1.2	0.000231	0.000591	TRUE	SigIncrease	intron	RLTR44C|LTR|ERVK	440285	NM_027671	Sntg1	0.011788	0.496078	RLTR44C	ERVK	LTR	LTR
chr1	8925120	8925860	6.11	6.14	6.07	0.07	0.786	0.88	FALSE	No_SigChange	6.51	6.14	6.81	-0.67	0.0267	0.0667	FALSE	No_SigChange	6.29	6.07	6.48	-0.41	0.135	0.183	FALSE	No_SigChange	6.32	6.14	6.48	-0.34	0.252	0.305	FALSE	No_SigChange	intron	RMER17B|LTR|ERVK	374240	NM_027671	Sntg1	0.014885	0.547297	RMER17B	ERVK	LTR	LTR
chr1	9298390	9300220	9.34	9.46	9.21	0.25	0.206	0.375	FALSE	No_SigChange	9.23	9.46	8.96	0.5	0.0437	0.095	FALSE	No_SigChange	8.85	9.21	8.36	0.84	0.000757	0.00229	TRUE	SigDecrease	9.01	9.46	8.36	1.09	2.26e-06	8.99e-06	TRUE	SigDecrease	5'UTR	5' UTR (NM_027671, exon 1 of 21)	425	NM_027671	Sntg1	0.053581	0.579781	5'UTR	5'UTR	5'UTR	Other
chr1	9313320	9313990	4.64	4.17	5	-0.83	0.0223	0.0717	FALSE	No_SigChange	5.23	4.17	5.84	-1.67	9.24e-06	0.000149	TRUE	SigIncrease	5.93	5	6.49	-1.49	8.62e-07	6.66e-06	TRUE	SigIncrease	5.75	4.17	6.49	-2.32	2.02e-11	2.4e-10	TRUE	SigIncrease	Intergenic	RMER17B2|LTR|ERVK	-13925	NM_027671	Sntg1	0.004484	0.497015	RMER17B2	ERVK	LTR	LTR
chr1	9448960	9449240	4.73	5.48	3.04	2.44	0.000399	0.00291	TRUE	SigDecrease	5.47	5.48	5.45	0.03	0.916	0.941	FALSE	No_SigChange	3.28	3.04	3.49	-0.45	0.501	0.563	FALSE	No_SigChange	4.81	5.48	3.49	1.99	2.65e-07	1.28e-06	TRUE	SigDecrease	Intergenic	L1Md_F|LINE|L1	-96308	NM_021511	Rrs1	0.003584	0.55	L1Md_F	L1	LINE	LINE
chr1	9469290	9470510	8.91	8.81	8.99	-0.18	0.383	0.569	FALSE	No_SigChange	8.78	8.81	8.75	0.06	0.811	0.861	FALSE	No_SigChange	8.7	8.99	8.34	0.65	0.0158	0.0297	FALSE	No_SigChange	8.59	8.81	8.34	0.47	0.0664	0.0929	FALSE	No_SigChange	Intergenic	RMER17B|LTR|ERVK	-75508	NM_021511	Rrs1	0.015587	0.540984	RMER17B	ERVK	LTR	LTR
chr1	9535830	9536060	5.21	5.09	5.33	-0.24	0.495	0.671	FALSE	No_SigChange	4.65	5.09	4.02	1.06	0.0391	0.0878	FALSE	No_SigChange	5.28	5.33	5.24	0.09	0.791	0.827	FALSE	No_SigChange	5.16	5.09	5.24	-0.15	0.714	0.755	FALSE	No_SigChange	Intergenic	RMER1A|Other|Other	-9463	NM_021511	Rrs1	0.008734	0.495652	RMER1A	Other	Other	Other
chr1	9541110	9541650	6.97	6.95	7	-0.05	0.787	0.881	FALSE	No_SigChange	6.78	6.94	6.6	0.34	0.149	0.236	FALSE	No_SigChange	6.78	7	6.51	0.48	0.0547	0.0847	FALSE	No_SigChange	6.74	6.94	6.51	0.43	0.0975	0.131	FALSE	No_SigChange	Intergenic	Intergenic	-4028	NM_021511	Rrs1	0.011132	0.442593	Intergenic	Intergenic	Intergenic	Other
chr1	9544810	9546120	9.65	9.58	9.71	-0.13	0.526	0.696	FALSE	No_SigChange	9.37	9.58	9.14	0.44	0.0674	0.13	FALSE	No_SigChange	9.45	9.71	9.13	0.58	0.0226	0.04	FALSE	No_SigChange	9.37	9.58	9.13	0.44	0.0553	0.0789	FALSE	No_SigChange	promoter-TSS	promoter-TSS (NM_021511)	57	NM_021511	Rrs1	0.076394	0.608397	promoter-TSS	promoter-TSS	promoter-TSS	Other
chr1	9547870	9548600	7.76	7.76	7.76	0	1	1	FALSE	No_SigChange	7.32	7.76	6.7	1.06	9.19e-05	0.000941	TRUE	SigDecrease	7.29	7.76	6.58	1.17	7.68e-06	4.48e-05	TRUE	SigDecrease	7.29	7.76	6.58	1.17	2.47e-06	9.74e-06	TRUE	SigDecrease	TTS	TTS (NM_021511)	189	NM_175236	Adhfe1	0.027435	0.505479	TTS	TTS	TTS	Other
chr1	9573220	9573620	6.22	6.2	6.23	-0.03	0.921	0.959	FALSE	No_SigChange	5.97	6.2	5.69	0.51	0.108	0.185	FALSE	No_SigChange	6.03	6.23	5.79	0.44	0.167	0.22	FALSE	No_SigChange	6.01	6.2	5.79	0.41	0.179	0.224	FALSE	No_SigChange	intron	intron (NR_027664, intron 12 of 12)	25374	NM_175236	Adhfe1	0.002506	0.45	intron	intron	intron	Other
chr1	9601290	9601710	6.08	5.56	6.47	-0.91	0.000768	0.00496	TRUE	SigIncrease	5.48	5.56	5.4	0.16	0.642	0.724	FALSE	No_SigChange	6.04	6.47	5.43	1.04	4.53e-05	0.000207	TRUE	SigDecrease	5.49	5.56	5.43	0.13	0.659	0.705	FALSE	No_SigChange	5'UTR	5' UTR (NM_178399, exon 1 of 6)	233	NM_178399	3110035E14Rik	0.02148	0.490476	5'UTR	5'UTR	5'UTR	Other
chr1	9621430	9621770	5.54	5.68	5.39	0.29	0.329	0.515	FALSE	No_SigChange	5.56	5.68	5.43	0.25	0.462	0.564	FALSE	No_SigChange	5.04	5.39	4.58	0.81	0.0133	0.0256	FALSE	No_SigChange	5.23	5.68	4.58	1.09	0.000595	0.00138	TRUE	SigDecrease	intron	intron (NR_015470, intron 1 of 4)	9492	NR_015470	2610203C22Rik	0.00295	0.479412	intron	intron	intron	Other
chr1	9629760	9630720	7.27	7.63	6.79	0.83	2.91e-05	0.000335	TRUE	SigDecrease	7.16	7.63	6.45	1.18	2.7e-05	0.000356	TRUE	SigDecrease	6.1	6.79	4.73	2.07	0.000234	0.000848	TRUE	SigDecrease	6.81	7.63	4.73	2.9	4.34e-07	2e-06	TRUE	SigDecrease	intron	intron (NR_015470, intron 1 of 4)	852	NR_015470	2610203C22Rik	0.01147	0.503125	intron	intron	intron	Other
chr1	9638940	9639670	5.91	5.86	5.97	-0.11	0.741	0.852	FALSE	No_SigChange	6.4	5.86	6.79	-0.93	0.00237	0.0115	FALSE	No_SigChange	6.45	5.96	6.82	-0.86	0.00892	0.0183	FALSE	No_SigChange	6.42	5.86	6.82	-0.96	0.00193	0.00395	TRUE	SigIncrease	Intergenic	Intergenic	-8213	NR_015470	2610203C22Rik	0.009602	0.446575	Intergenic	Intergenic	Intergenic	Other
chr1	9648930	9649630	7	6.8	7.18	-0.38	0.124	0.262	FALSE	No_SigChange	6.61	6.8	6.4	0.4	0.178	0.27	FALSE	No_SigChange	6.69	7.17	5.96	1.22	4.4e-05	0.000202	TRUE	SigDecrease	6.44	6.8	5.96	0.84	0.00861	0.015	FALSE	No_SigChange	Intergenic	Intergenic	-18188	NR_015470	2610203C22Rik	0.031474	0.548571	Intergenic	Intergenic	Intergenic	Other
chr1	9699540	9701190	10.16	10.14	10.19	-0.05	0.791	0.884	FALSE	No_SigChange	10	10.14	9.86	0.28	0.252	0.352	FALSE	No_SigChange	9.96	10.18	9.68	0.5	0.0455	0.0725	FALSE	No_SigChange	9.93	10.13	9.68	0.45	0.0475	0.0689	FALSE	No_SigChange	promoter-TSS	promoter-TSS (NM_008651)	-156	NM_008651	Mybl1	0.0849	0.650909	promoter-TSS	promoter-TSS	promoter-TSS	Other
chr1	9702000	9702430	6.81	6.4	7.13	-0.72	0.00167	0.00925	TRUE	SigIncrease	6.29	6.4	6.17	0.23	0.407	0.511	FALSE	No_SigChange	6.55	7.13	5.59	1.54	1.68e-08	2.12e-07	TRUE	SigDecrease	6.05	6.4	5.59	0.81	0.00523	0.00963	TRUE	SigDecrease	Intergenic	RLTR12C|LTR|ERVK	-2006	NM_008651	Mybl1	0.006993	0.45814	RLTR12C	ERVK	LTR	LTR
chr1	9703060	9703350	5.99	5.99	6	-0.01	0.969	0.984	FALSE	No_SigChange	5.77	5.99	5.52	0.47	0.109	0.186	FALSE	No_SigChange	5.79	6	5.55	0.45	0.135	0.183	FALSE	No_SigChange	5.78	5.99	5.55	0.44	0.142	0.183	FALSE	No_SigChange	Intergenic	B3|SINE|B2	-2996	NM_008651	Mybl1	0.00346	0.458621	B3	B2	SINE	SINE
chr1	9747640	9748830	9.49	9.49	9.49	0.01	0.973	0.986	FALSE	No_SigChange	9.24	9.49	8.93	0.56	0.017	0.0482	FALSE	No_SigChange	9.21	9.48	8.87	0.61	0.00834	0.0173	FALSE	No_SigChange	9.21	9.49	8.87	0.62	0.00603	0.0109	FALSE	No_SigChange	5'UTR	non-coding (NR_040462, exon 1 of 4)	147	NM_173443	Vcpip1	0.077376	0.594118	non-coding	non-coding	non-coding	Other
chr1	9755550	9756340	5.44	5.69	5.13	0.56	0.0455	0.124	FALSE	No_SigChange	6.2	5.69	6.58	-0.89	0.00471	0.0192	FALSE	No_SigChange	5.21	5.13	5.28	-0.16	0.637	0.69	FALSE	No_SigChange	5.5	5.69	5.28	0.41	0.186	0.232	FALSE	No_SigChange	intron	AT_rich|Low_complexity|Low_complexity	-7563	NM_173443	Vcpip1	0.00507	0.401266	AT_rich	Low_complexity	Low_complexity	Other
chr1	9768160	9769150	7.87	7.61	8.08	-0.47	0.0141	0.0505	FALSE	No_SigChange	7.97	7.61	8.25	-0.64	0.00893	0.0306	FALSE	No_SigChange	8.07	8.08	8.05	0.03	0.901	0.92	FALSE	No_SigChange	7.85	7.61	8.05	-0.44	0.103	0.137	FALSE	No_SigChange	intron	RLTR26|LTR|ERVK	-20273	NM_173443	Vcpip1	0.015167	0.539394	RLTR26	ERVK	LTR	LTR
chr1	9772900	9773360	6.54	6.5	6.59	-0.09	0.707	0.829	FALSE	No_SigChange	6.47	6.49	6.45	0.05	0.858	0.897	FALSE	No_SigChange	6.52	6.59	6.45	0.13	0.577	0.635	FALSE	No_SigChange	6.47	6.49	6.45	0.04	0.874	0.895	FALSE	No_SigChange	Intergenic	Intergenic	-24748	NM_173443	Vcpip1	0.017429	0.447826	Intergenic	Intergenic	Intergenic	Other
chr1	9797690	9799100	9.1	8.82	9.34	-0.52	0.00634	0.0269	FALSE	No_SigChange	8.68	8.81	8.53	0.28	0.279	0.382	FALSE	No_SigChange	9.01	9.34	8.58	0.76	0.00221	0.00568	TRUE	SigDecrease	8.7	8.81	8.58	0.23	0.325	0.382	FALSE	No_SigChange	intron	CpG	265	NM_133220	Sgk3	0.097232	0.612057	CpG	CpG	CpG	Other
chr1	9825630	9825990	4.37	3.39	4.95	-1.56	0.00164	0.00912	TRUE	SigIncrease	4.84	3.39	5.55	-2.16	6.07e-07	1.62e-05	TRUE	SigIncrease	5.7	4.95	6.18	-1.23	0.000553	0.00176	TRUE	SigIncrease	5.38	3.39	6.18	-2.79	4.96e-13	8.51e-12	TRUE	SigIncrease	intron	(GGATG)n|Simple_repeat|Simple_repeat	-22471	NM_001037759	Sgk3	0.002786	0.5	(GGATG)n	Simple_repeat	Simple_repeat	Other
chr1	9845850	9846170	3.19	2.58	3.61	-1.03	0.126	0.264	FALSE	No_SigChange	4.1	2.58	4.82	-2.24	3.98e-05	0.000484	TRUE	SigIncrease	4.65	3.61	5.25	-1.63	0.000327	0.00113	TRUE	SigIncrease	4.46	2.58	5.25	-2.66	2.97e-08	1.76e-07	TRUE	SigIncrease	intron	B3A|SINE|B2	-2271	NM_001037759	Sgk3	0.00627	0.409375	B3A	B2	SINE	SINE
chr1	9847630	9848860	9.01	8.98	9.04	-0.05	0.79	0.883	FALSE	No_SigChange	8.82	8.98	8.65	0.33	0.176	0.268	FALSE	No_SigChange	8.84	9.03	8.62	0.41	0.0974	0.138	FALSE	No_SigChange	8.81	8.98	8.62	0.36	0.133	0.173	FALSE	No_SigChange	promoter-TSS	promoter-TSS (NM_001037759)	-36	NM_001037759	Sgk3	0.04882	0.557724	promoter-TSS	promoter-TSS	promoter-TSS	Other
chr1	9865460	9865700	4.66	4.09	5.07	-0.98	0.0218	0.0705	FALSE	No_SigChange	4.1	4.09	4.11	-0.02	0.967	0.977	FALSE	No_SigChange	4.59	5.06	3.88	1.18	0.00144	0.00396	TRUE	SigDecrease	3.99	4.09	3.88	0.2	0.709	0.75	FALSE	No_SigChange	intron	B1_Mur4|SINE|Alu	17299	NM_001037759	Sgk3	0.012552	0.45	B1_Mur4	Alu	SINE	SINE
chr1	9874350	9874570	0.46	0	0.81	-0.81	0.641	0.783	FALSE	No_SigChange	0	0	0	0	0.999	0.999	FALSE	No_SigChange	0.7	0.8	0.58	0.22	0.873	0.897	FALSE	No_SigChange	0.32	0	0.58	-0.59	0.737	0.776	FALSE	No_SigChange	intron	intron (NM_177547, intron 5 of 16)	26179	NM_001037759	Sgk3	0.013699	0.568182	intron	intron	intron	Other
chr1	9908390	9909430	7.85	7.31	8.25	-0.94	1.65e-06	3e-05	TRUE	SigIncrease	7.2	7.3	7.09	0.21	0.394	0.499	FALSE	No_SigChange	7.88	8.25	7.38	0.86	0.000279	0.000983	TRUE	SigDecrease	7.34	7.3	7.38	-0.08	0.733	0.771	FALSE	No_SigChange	intron	intron (NM_177722, intron 1 of 14)	272	NM_177722	Mcmdc2	0.035611	0.522115	intron	intron	intron	Other
chr1	9938710	9939330	6.22	6.07	6.36	-0.29	0.313	0.499	FALSE	No_SigChange	5.96	6.07	5.85	0.22	0.496	0.596	FALSE	No_SigChange	6.05	6.36	5.65	0.71	0.0127	0.0246	FALSE	No_SigChange	5.87	6.07	5.65	0.42	0.174	0.22	FALSE	No_SigChange	intron	Lx3A|LINE|L1	3523	NR_004410	Snord87	0.004847	0.487097	Lx3A	L1	LINE	LINE
chr1	9940330	9941640	7.31	7.58	6.97	0.62	0.0112	0.042	FALSE	No_SigChange	7.07	7.58	6.25	1.33	0.00015	0.00139	TRUE	SigDecrease	6.59	6.97	6.08	0.89	0.00662	0.0143	FALSE	No_SigChange	7.02	7.58	6.08	1.5	1.97e-06	7.92e-06	TRUE	SigDecrease	TTS	TTS (NM_177722)	1558	NR_004410	Snord87	0.003056	0.409924	TTS	TTS	TTS	Other
chr1	9942970	9943150	4.99	5.19	4.75	0.44	0.184	0.346	FALSE	No_SigChange	4.85	5.19	4.41	0.78	0.0692	0.133	FALSE	No_SigChange	4.77	4.75	4.78	-0.03	0.94	0.952	FALSE	No_SigChange	5	5.19	4.78	0.41	0.28	0.335	FALSE	No_SigChange	promoter-TSS	promoter-TSS (NR_004410)	-517	NR_004410	Snord87	0.027933	0.5	promoter-TSS	promoter-TSS	promoter-TSS	Other
chr1	9943730	9944800	8.83	8.74	8.91	-0.17	0.409	0.595	FALSE	No_SigChange	8.62	8.74	8.49	0.25	0.343	0.448	FALSE	No_SigChange	8.79	8.91	8.66	0.25	0.345	0.41	FALSE	No_SigChange	8.7	8.74	8.66	0.08	0.762	0.797	FALSE	No_SigChange	promoter-TSS	promoter-TSS (NR_024067)	-147	NR_024067	Snhg6	0.055192	0.546729	promoter-TSS	promoter-TSS	promoter-TSS	Other
chr1	9955080	9955310	5.18	4.86	5.45	-0.59	0.061	0.155	FALSE	No_SigChange	4.75	4.86	4.63	0.23	0.579	0.67	FALSE	No_SigChange	5.24	5.45	5	0.45	0.152	0.202	FALSE	No_SigChange	4.93	4.86	5	-0.14	0.687	0.73	FALSE	No_SigChange	Intergenic	RLTR18|LTR|ERVK	-11077	NR_024067	Snhg6	0.008734	0.452174	RLTR18	ERVK	LTR	LTR
chr1	9966910	9968420	9.27	9.16	9.38	-0.21	0.286	0.47	FALSE	No_SigChange	9.04	9.16	8.9	0.26	0.308	0.412	FALSE	No_SigChange	9.08	9.37	8.72	0.66	0.00695	0.0148	FALSE	No_SigChange	8.95	9.16	8.72	0.44	0.0724	0.1	FALSE	No_SigChange	TTS	promoter-TSS (NM_001285425)	-23547	NR_024067	Snhg6	0.102717	0.678146	promoter-TSS	promoter-TSS	promoter-TSS	Other
chr1	9984760	9984920	4.38	3.81	4.79	-0.99	0.0113	0.0424	FALSE	No_SigChange	3.74	3.81	3.67	0.13	0.804	0.856	FALSE	No_SigChange	5.03	4.79	5.23	-0.44	0.192	0.247	FALSE	No_SigChange	4.69	3.8	5.23	-1.42	0.000193	0.000502	TRUE	SigIncrease	intron	intron (NM_145692, intron 6 of 8)	24280	NM_145692	Ppp1r42	0.025157	0.525	intron	intron	intron	Other
chr1	9989820	9990400	6.73	6.78	6.68	0.11	0.641	0.784	FALSE	No_SigChange	6.75	6.78	6.71	0.07	0.782	0.839	FALSE	No_SigChange	6.53	6.67	6.38	0.3	0.237	0.296	FALSE	No_SigChange	6.59	6.78	6.38	0.4	0.0859	0.117	FALSE	No_SigChange	intron	intron (NR_110971, intron 5 of 6)	19010	NM_145692	Ppp1r42	0.005181	0.441379	intron	intron	intron	Other
chr1	9998840	9999300	5.64	5.81	5.44	0.36	0.228	0.403	FALSE	No_SigChange	5.6	5.81	5.35	0.46	0.168	0.259	FALSE	No_SigChange	4.97	5.44	4.27	1.17	0.124	0.17	FALSE	No_SigChange	5.23	5.8	4.27	1.54	0.0316	0.0479	FALSE	No_SigChange	intron	intron (NR_110971, intron 4 of 6)	10050	NM_145692	Ppp1r42	0.015251	0.480435	intron	intron	intron	Other
chr1	10007250	10007480	5.4	5.43	5.37	0.05	0.85	0.919	FALSE	No_SigChange	5.02	5.42	4.44	0.98	0.00383	0.0165	FALSE	No_SigChange	5.07	5.37	4.69	0.69	0.0258	0.0447	FALSE	No_SigChange	5.1	5.42	4.69	0.74	0.0205	0.0326	FALSE	No_SigChange	intron	B2_Mm2|SINE|B2	1755	NM_145692	Ppp1r42	0.008734	0.443478	B2_Mm2	B2	SINE	SINE
chr1	10008790	10009650	8.31	8.26	8.35	-0.09	0.681	0.811	FALSE	No_SigChange	8.09	8.26	7.89	0.37	0.179	0.271	FALSE	No_SigChange	7.99	8.35	7.52	0.83	0.00083	0.00248	TRUE	SigDecrease	7.94	8.26	7.52	0.74	0.00264	0.00522	TRUE	SigDecrease	promoter-TSS	promoter-TSS (NM_145692)	-90	NM_027033	Ppp1r42	0.032596	0.517442	promoter-TSS	promoter-TSS	promoter-TSS	Other
chr1	10031650	10032080	6.11	5.43	6.57	-1.13	0.000371	0.00275	TRUE	SigIncrease	4.67	5.43	2.95	2.48	0.00583	0.0224	FALSE	No_SigChange	5.73	6.56	3.55	3.01	7.12e-07	5.64e-06	TRUE	SigDecrease	4.78	5.43	3.55	1.88	0.000159	0.000422	TRUE	SigDecrease	intron	ORR1D1|LTR|ERVL-MaLR	6033	NM_013715	Cops5	0.013986	0.474419	ORR1D1	ERVL-MaLR	LTR	LTR
chr1	10037620	10038470	8.84	8.83	8.85	-0.02	0.925	0.961	FALSE	No_SigChange	8.64	8.83	8.43	0.39	0.121	0.201	FALSE	No_SigChange	8.7	8.84	8.55	0.3	0.233	0.292	FALSE	No_SigChange	8.69	8.83	8.55	0.28	0.243	0.295	FALSE	No_SigChange	promoter-TSS	promoter-TSS (NM_026493)	-147	NM_013715	Cops5	0.062426	0.537647	promoter-TSS	promoter-TSS	promoter-TSS	Other
chr1	10039280	10040410	9.83	9.81	9.85	-0.04	0.823	0.903	FALSE	No_SigChange	9.66	9.81	9.5	0.31	0.182	0.275	FALSE	No_SigChange	9.63	9.85	9.37	0.48	0.0402	0.0652	FALSE	No_SigChange	9.61	9.81	9.37	0.44	0.0364	0.0543	FALSE	No_SigChange	intron	CpG	1627	NM_026493	Cspp1	0.071745	0.60531	CpG	CpG	CpG	Other
chr1	10049280	10049870	5.89	4.97	6.46	-1.49	2.91e-07	6.78e-06	TRUE	SigIncrease	4.98	4.96	4.99	-0.02	0.946	0.963	FALSE	No_SigChange	6.33	6.45	6.19	0.26	0.301	0.365	FALSE	No_SigChange	5.7	4.96	6.19	-1.23	3.55e-05	0.000109	TRUE	SigIncrease	intron	(GA)n|Simple_repeat|Simple_repeat	11357	NM_026493	Cspp1	0.027165	0.455932	(GA)n	Simple_repeat	Simple_repeat	Other
chr1	10084420	10084770	6.24	5.8	6.58	-0.78	0.000671	0.00445	TRUE	SigIncrease	5.33	5.8	4.61	1.18	0.001	0.00604	TRUE	SigDecrease	6.04	6.58	5.19	1.39	8.14e-06	4.71e-05	TRUE	SigDecrease	5.53	5.8	5.19	0.61	0.0849	0.116	FALSE	No_SigChange	intron	intron (NM_026493, intron 11 of 29)	46377	NM_026493	Cspp1	0.002865	0.437143	intron	intron	intron	Other
chr1	10089570	10089920	6.32	6.22	6.41	-0.19	0.364	0.552	FALSE	No_SigChange	6.03	6.22	5.81	0.4	0.171	0.262	FALSE	No_SigChange	6.01	6.41	5.46	0.95	0.000191	0.00071	TRUE	SigDecrease	5.89	6.22	5.46	0.76	0.0047	0.00874	TRUE	SigDecrease	intron	B4|SINE|B4	51527	NM_026493	Cspp1	0.002865	0.437143	B4	B4	SINE	SINE
chr1	10170760	10172420	7.53	5.84	8.28	-2.44	5.2e-22	7.36e-19	TRUE	SigIncrease	6.09	5.84	6.31	-0.47	0.183	0.276	FALSE	No_SigChange	8.03	8.28	7.73	0.55	0.0146	0.0277	FALSE	No_SigChange	7.08	5.84	7.73	-1.9	2.92e-12	4.21e-11	TRUE	SigIncrease	intron	intron (NM_001102430, intron 21 of 37)	61080	NM_001102430	Arfgef1	0.013864	0.436145	intron	intron	intron	Other
chr1	10191710	10192120	6.06	5.43	6.49	-1.06	3.23e-05	0.000365	TRUE	SigIncrease	5.15	5.43	4.79	0.64	0.0873	0.158	FALSE	No_SigChange	6.05	6.49	5.42	1.07	4.49e-05	0.000205	TRUE	SigDecrease	5.42	5.43	5.42	0.02	0.959	0.967	FALSE	No_SigChange	intron	RLTR11A|LTR|ERVK	40755	NM_001102430	Arfgef1	0.00489	0.409756	RLTR11A	ERVK	LTR	LTR
chr1	10231720	10233780	9.82	9.69	9.93	-0.24	0.233	0.409	FALSE	No_SigChange	9.54	9.69	9.36	0.33	0.198	0.293	FALSE	No_SigChange	9.67	9.93	9.35	0.58	0.021	0.0376	FALSE	No_SigChange	9.53	9.69	9.35	0.34	0.176	0.221	FALSE	No_SigChange	promoter-TSS	promoter-TSS (NM_001102430)	-80	NM_001102430	Arfgef1	0.092278	0.633495	promoter-TSS	promoter-TSS	promoter-TSS	Other
chr1	10239130	10239380	4.14	2.58	4.87	-2.29	8.7e-06	0.000122	TRUE	SigIncrease	3.25	2.58	3.7	-1.12	0.101	0.176	FALSE	No_SigChange	4.93	4.87	4.99	-0.12	0.704	0.751	FALSE	No_SigChange	4.24	2.58	4.99	-2.41	2.93e-06	1.14e-05	TRUE	SigIncrease	Intergenic	L1_Mus3|LINE|L1	-6585	NM_001102430	Arfgef1	0.012048	0.572	L1_Mus3	L1	LINE	LINE
chr1	10285400	10285810	6.41	6.66	6.11	0.54	0.0314	0.0933	FALSE	No_SigChange	6.51	6.66	6.35	0.31	0.404	0.509	FALSE	No_SigChange	5.72	6.11	5.17	0.94	0.00125	0.00351	TRUE	SigDecrease	6.1	6.66	5.17	1.49	3.24e-07	1.53e-06	TRUE	SigDecrease	Intergenic	Intergenic	-52935	NM_001102430	Arfgef1	0.00978	0.504878	Intergenic	Intergenic	Intergenic	Other
chr1	10395790	10395980	4.33	3.67	4.78	-1.11	0.00572	0.0248	FALSE	No_SigChange	3.44	3.67	3.17	0.5	0.346	0.451	FALSE	No_SigChange	4.81	4.78	4.84	-0.07	0.859	0.885	FALSE	No_SigChange	4.37	3.67	4.84	-1.17	0.00502	0.00929	TRUE	SigIncrease	intron	RLTR9E|LTR|ERVK	-163215	NM_001102430	Arfgef1	0.015873	0.478947	RLTR9E	ERVK	LTR	LTR
chr1	10398010	10398260	5.48	5.13	5.75	-0.63	0.04	0.112	FALSE	No_SigChange	5.32	5.13	5.48	-0.36	0.287	0.39	FALSE	No_SigChange	5.58	5.75	5.38	0.37	0.225	0.283	FALSE	No_SigChange	5.26	5.13	5.38	-0.26	0.475	0.532	FALSE	No_SigChange	intron	B3A|SINE|B2	-165465	NM_001102430	Arfgef1	0.004016	0.448	B3A	B2	SINE	SINE
chr1	10488260	10488570	4.71	4.88	4.52	0.36	0.3	0.485	FALSE	No_SigChange	5.01	4.88	5.13	-0.25	0.466	0.568	FALSE	No_SigChange	5.08	4.52	5.47	-0.95	0.0025	0.0063	TRUE	SigIncrease	5.21	4.88	5.47	-0.59	0.0586	0.083	FALSE	No_SigChange	intron	intron (NM_001289497, intron 2 of 9)	231528	NM_177834	Cpa6	0.003236	0.483871	intron	intron	intron	Other
chr1	10592680	10593310	6.21	6.85	5	1.85	0.0003	0.00231	TRUE	SigDecrease	6.92	6.85	6.98	-0.13	0.855	0.895	FALSE	No_SigChange	4.73	5	4.39	0.61	0.101	0.142	FALSE	No_SigChange	6.09	6.85	4.39	2.46	3.97e-10	3.57e-09	TRUE	SigDecrease	intron	intron (NM_177834, intron 2 of 10)	126948	NM_177834	Cpa6	0.006359	0.471429	intron	intron	intron	Other
chr1	10695010	10695340	4.89	4.39	5.27	-0.87	0.0104	0.0398	FALSE	No_SigChange	4.43	4.39	4.48	-0.08	0.85	0.891	FALSE	No_SigChange	4.87	5.26	4.32	0.94	0.00965	0.0196	FALSE	No_SigChange	4.36	4.39	4.32	0.07	0.87	0.891	FALSE	No_SigChange	intron	intron (NM_001289497, intron 1 of 9)	24768	NM_177834	Cpa6	0.042553	0.539394	intron	intron	intron	Other
chr1	10759420	10759980	5.87	5.51	6.16	-0.66	0.0133	0.0481	FALSE	No_SigChange	5.67	5.51	5.82	-0.31	0.312	0.416	FALSE	No_SigChange	5.88	6.16	5.54	0.62	0.0237	0.0417	FALSE	No_SigChange	5.52	5.51	5.54	-0.03	0.916	0.93	FALSE	No_SigChange	intron	intron (NR_030645, intron 2 of 3)	-39757	NM_177834	Cpa6	0	0.475	intron	intron	intron	Other
chr1	10815160	10815330	4.35	4.88	3.49	1.39	0.00261	0.0133	FALSE	No_SigChange	4.52	4.88	4.04	0.84	0.0372	0.0847	FALSE	No_SigChange	3.25	3.49	2.95	0.54	0.388	0.454	FALSE	No_SigChange	4.22	4.88	2.95	1.93	3.63e-05	0.000111	TRUE	SigDecrease	intron	ERVB7_3-LTR_MM|LTR|ERVK	50629	NR_030645	Mir467e	0.011834	0.523529	ERVB7_3-LTR_MM	ERVK	LTR	LTR
chr1	10878180	10878540	5.78	5.69	5.87	-0.18	0.516	0.688	FALSE	No_SigChange	5.22	5.68	4.54	1.15	0.00263	0.0125	FALSE	No_SigChange	5.65	5.87	5.4	0.47	0.154	0.205	FALSE	No_SigChange	5.55	5.68	5.4	0.28	0.445	0.503	FALSE	No_SigChange	Intergenic	RMER16A3|LTR|ERVK	-12486	NR_030645	Mir467e	0.002786	0.408333	RMER16A3	ERVK	LTR	LTR
chr1	10880090	10880430	5.89	5.57	6.16	-0.59	0.0415	0.115	FALSE	No_SigChange	5.44	5.57	5.3	0.26	0.387	0.492	FALSE	No_SigChange	5.92	6.16	5.64	0.52	0.0896	0.129	FALSE	No_SigChange	5.6	5.57	5.64	-0.07	0.822	0.851	FALSE	No_SigChange	Intergenic	RLTR41|LTR|ERV1	-14386	NR_030645	Mir467e	0.023599	0.497059	RLTR41	ERV1	LTR	LTR
chr1	10993200	10994460	8.64	8.58	8.69	-0.11	0.57	0.73	FALSE	No_SigChange	8.27	8.58	7.87	0.71	0.00485	0.0196	FALSE	No_SigChange	8.28	8.69	7.71	0.98	8.02e-05	0.000338	TRUE	SigDecrease	8.21	8.58	7.71	0.87	0.000516	0.00121	TRUE	SigDecrease	exon	exon (NM_029525, exon 1 of 40)	365	NM_029525	Prex2	0.063542	0.570635	exon	exon	exon	Other
chr1	11065330	11065600	5.47	5.07	5.78	-0.72	0.00873	0.0347	FALSE	No_SigChange	5.28	5.06	5.48	-0.41	0.2	0.295	FALSE	No_SigChange	5.57	5.78	5.33	0.45	0.109	0.152	FALSE	No_SigChange	5.2	5.06	5.33	-0.27	0.416	0.474	FALSE	No_SigChange	intron	intron (NM_029525, intron 2 of 39)	72000	NM_029525	Prex2	0.011152	0.514815	intron	intron	intron	Other
chr1	11097400	11097620	5.74	5.81	5.68	0.13	0.614	0.764	FALSE	No_SigChange	5.75	5.81	5.69	0.11	0.683	0.758	FALSE	No_SigChange	5.68	5.68	5.69	-0.01	0.974	0.979	FALSE	No_SigChange	5.75	5.8	5.69	0.12	0.655	0.702	FALSE	No_SigChange	intron	intron (NM_029525, intron 6 of 39)	104045	NM_029525	Prex2	0.004566	0.522727	intron	intron	intron	Other
chr1	11277790	11278550	8.44	8.53	8.34	0.19	0.408	0.593	FALSE	No_SigChange	8.1	8.53	7.49	1.04	5.9e-05	0.000665	TRUE	SigDecrease	7.85	8.34	7.09	1.25	9.88e-06	5.58e-05	TRUE	SigDecrease	7.98	8.53	7.09	1.43	1.13e-08	7.33e-08	TRUE	SigDecrease	intron	RLTR41C|LTR|ERV1	14207	NM_001033636	Prex2	0.011858	0.453947	RLTR41C	ERV1	LTR	LTR
chr1	11295250	11296050	6.8	6.3	7.16	-0.86	0.0915	0.209	FALSE	No_SigChange	6.18	6.3	6.04	0.26	0.494	0.594	FALSE	No_SigChange	6.94	7.16	6.68	0.48	0.12	0.166	FALSE	No_SigChange	6.5	6.3	6.68	-0.38	0.519	0.575	FALSE	No_SigChange	intron	RMER17A2|LTR|ERVK	31687	NM_001033636	Prex2	0.017522	0.5525	RMER17A2	ERVK	LTR	LTR
chr1	11329330	11330980	9.01	8.99	9.03	-0.04	0.852	0.92	FALSE	No_SigChange	8.71	8.99	8.38	0.61	0.00727	0.0263	FALSE	No_SigChange	8.62	9.03	8.05	0.98	0.000128	0.000504	TRUE	SigDecrease	8.59	8.99	8.05	0.94	3.54e-05	0.000109	TRUE	SigDecrease	Intergenic	RLTR9A3|LTR|ERVK	66192	NM_001033636	Prex2	0.015161	0.467879	RLTR9A3	ERVK	LTR	LTR
chr1	11350800	11351660	7.05	7.21	6.86	0.35	0.102	0.226	FALSE	No_SigChange	6.65	7.21	5.73	1.48	1.86e-06	4.05e-05	TRUE	SigDecrease	6.47	6.86	5.92	0.94	0.000234	0.000848	TRUE	SigDecrease	6.7	7.21	5.92	1.29	5.97e-08	3.31e-07	TRUE	SigDecrease	Intergenic	RLTR13C3|LTR|ERVK	-62875	NM_001160371	A830018L16Rik	0.005821	0.406977	RLTR13C3	ERVK	LTR	LTR
chr1	11385990	11386140	4.57	3.39	5.21	-1.82	1.63e-05	0.000207	TRUE	SigIncrease	3.21	3.39	3	0.39	0.548	0.642	FALSE	No_SigChange	4.59	5.21	3.49	1.72	5.99e-06	3.62e-05	TRUE	SigDecrease	3.44	3.39	3.49	-0.1	0.865	0.887	FALSE	No_SigChange	Intergenic	ORR1E|LTR|ERVL-MaLR	-28040	NM_001160371	A830018L16Rik	0.013423	0.486667	ORR1E	ERVL-MaLR	LTR	LTR
chr1	11395360	11396630	8.85	8.81	8.89	-0.08	0.689	0.817	FALSE	No_SigChange	8.19	8.81	7.08	1.73	2.59e-11	4.02e-09	TRUE	SigDecrease	8.26	8.89	7.11	1.78	5.07e-11	1.26e-09	TRUE	SigDecrease	8.2	8.81	7.11	1.7	1.05e-11	1.34e-10	TRUE	SigDecrease	Intergenic	ETnERV2-int|LTR|ERVK	-18110	NM_001160371	A830018L16Rik	0.00394	0.43937	ETnERV2-int	ERVK	LTR	LTR
chr1	11401040	11401520	7.47	7.5	7.45	0.05	0.786	0.88	FALSE	No_SigChange	7.12	7.5	6.61	0.88	0.000721	0.00467	TRUE	SigDecrease	6.78	7.44	5.49	1.95	5.14e-14	2.89e-12	TRUE	SigDecrease	6.82	7.5	5.49	2.01	2.68e-13	4.87e-12	TRUE	SigDecrease	Intergenic	RLTR9A2|LTR|ERVK	-12825	NM_001160371	A830018L16Rik	0.006263	0.5	RLTR9A2	ERVK	LTR	LTR
chr1	11413600	11414870	9.33	9.28	9.37	-0.09	0.626	0.773	FALSE	No_SigChange	9.03	9.28	8.72	0.56	0.016	0.0462	FALSE	No_SigChange	8.91	9.37	8.22	1.16	5.82e-06	3.53e-05	TRUE	SigDecrease	8.84	9.28	8.22	1.06	9.15e-06	3.19e-05	TRUE	SigDecrease	5'UTR	5' UTR (NM_177173, exon 1 of 14)	130	NM_001160369	A830018L16Rik	0.050433	0.572441	5'UTR	5'UTR	5'UTR	Other
chr1	11466790	11467100	4.56	3.83	5.04	-1.21	0.00124	0.00729	TRUE	SigIncrease	4.12	3.83	4.36	-0.53	0.318	0.423	FALSE	No_SigChange	5.13	5.04	5.22	-0.18	0.586	0.643	FALSE	No_SigChange	4.69	3.83	5.22	-1.39	0.000317	0.000785	TRUE	SigIncrease	intron	intron (NM_001160370, intron 1 of 6)	52840	NM_001160369	A830018L16Rik	0.009709	0.390323	intron	intron	intron	Other
chr1	11492930	11493300	5.66	5.64	5.68	-0.04	0.878	0.935	FALSE	No_SigChange	5.18	5.64	4.51	1.13	0.0108	0.0351	FALSE	No_SigChange	5.31	5.68	4.81	0.87	0.00293	0.00721	TRUE	SigDecrease	5.28	5.63	4.81	0.83	0.0131	0.0218	FALSE	No_SigChange	intron	RLTR9C|LTR|ERVK	79010	NM_001160369	A830018L16Rik	0.00542	0.432432	RLTR9C	ERVK	LTR	LTR
chr1	11501470	11502100	6.84	6.21	7.27	-1.05	2.7e-05	0.000315	TRUE	SigIncrease	5.46	6.21	3.81	2.41	0.00427	0.0179	FALSE	No_SigChange	6.47	7.27	4.55	2.71	5.98e-06	3.61e-05	TRUE	SigDecrease	5.61	6.21	4.55	1.66	0.0145	0.024	FALSE	No_SigChange	intron	RLTR25A|LTR|ERVK	87680	NM_001160369	A830018L16Rik	0.00159	0.384127	RLTR25A	ERVK	LTR	LTR
chr1	11521580	11522020	5.92	5.49	6.24	-0.75	0.00673	0.0283	FALSE	No_SigChange	5.69	5.49	5.87	-0.38	0.248	0.348	FALSE	No_SigChange	6.33	6.24	6.42	-0.18	0.474	0.538	FALSE	No_SigChange	6.03	5.49	6.42	-0.93	0.00168	0.00348	TRUE	SigIncrease	intron	RLTRETN_Mm|LTR|ERVK	107695	NM_001160369	A830018L16Rik	0.01139	0.495455	RLTRETN_Mm	ERVK	LTR	LTR
chr1	11564860	11565550	6.2	6.08	6.31	-0.24	0.352	0.54	FALSE	No_SigChange	6.18	6.08	6.29	-0.21	0.441	0.544	FALSE	No_SigChange	6.2	6.31	6.09	0.22	0.404	0.47	FALSE	No_SigChange	6.08	6.07	6.09	-0.01	0.964	0.971	FALSE	No_SigChange	intron	intron (NM_001160370, intron 5 of 6)	151100	NM_001160369	A830018L16Rik	0.015965	0.453623	intron	intron	intron	Other
chr1	11588210	11588690	5.5	5.03	5.85	-0.82	0.00329	0.016	FALSE	No_SigChange	4.7	5.03	4.27	0.77	0.0399	0.089	FALSE	No_SigChange	5.43	5.85	4.84	1	0.0975	0.138	FALSE	No_SigChange	4.94	5.03	4.84	0.19	0.678	0.722	FALSE	No_SigChange	exon	exon (NM_177173, exon 6 of 14)	174345	NM_001160369	A830018L16Rik	0.020877	0.445833	exon	exon	exon	Other
chr1	11657860	11658100	5.48	5.21	5.7	-0.49	0.0988	0.221	FALSE	No_SigChange	5.13	5.21	5.04	0.16	0.631	0.715	FALSE	No_SigChange	5.38	5.7	4.98	0.72	0.0114	0.0225	FALSE	No_SigChange	5.1	5.21	4.98	0.23	0.485	0.542	FALSE	No_SigChange	intron	intron (NM_001160369, intron 7 of 13)	243875	NM_001160369	A830018L16Rik	0.004184	0.3625	intron	intron	intron	Other
chr1	11748490	11748690	5.26	5.43	5.05	0.38	0.213	0.385	FALSE	No_SigChange	4.77	5.43	3.52	1.91	3.49e-07	1.04e-05	TRUE	SigDecrease	4.24	5.05	2.17	2.88	1.91e-07	1.78e-06	TRUE	SigDecrease	4.58	5.43	2.17	3.26	2.53e-10	2.36e-09	TRUE	SigDecrease	intron	intron (NM_001160369, intron 8 of 13)	334485	NM_001160369	A830018L16Rik	0	0.425	intron	intron	intron	Other
chr1	12025850	12026220	6.27	6.63	5.81	0.82	0.00641	0.0272	FALSE	No_SigChange	5.83	6.62	3.95	2.67	0.000121	0.00117	TRUE	SigDecrease	5.32	5.81	4.6	1.21	0.000226	0.000823	TRUE	SigDecrease	5.94	6.62	4.6	2.02	5.16e-10	4.52e-09	TRUE	SigDecrease	Intergenic	L1_Mur3|LINE|L1	611930	NM_001160369	A830018L16Rik	0	0.445946	L1_Mur3	L1	LINE	LINE
chr1	12126380	12127130	7.22	7.2	7.23	-0.03	0.881	0.936	FALSE	No_SigChange	6.63	7.2	5.67	1.53	8.72e-08	3.33e-06	TRUE	SigDecrease	6.67	7.23	5.72	1.51	7.65e-08	8.04e-07	TRUE	SigDecrease	6.64	7.2	5.72	1.48	8.79e-08	4.7e-07	TRUE	SigDecrease	Intergenic	L1_Mus4|LINE|L1	-540808	NR_045297	Gm17644	0.004005	0.5	L1_Mus4	L1	LINE	LINE
chr1	12147920	12148100	4.79	5.21	4.19	1.02	0.00516	0.0229	FALSE	No_SigChange	4.69	5.21	3.88	1.33	0.00238	0.0116	FALSE	No_SigChange	3.89	4.19	3.52	0.66	0.184	0.238	FALSE	No_SigChange	4.6	5.21	3.52	1.68	2.78e-05	8.74e-05	TRUE	SigDecrease	Intergenic	RMER20B|LTR|ERVK	-519553	NR_045297	Gm17644	0	0.45	RMER20B	ERVK	LTR	LTR
chr1	12577160	12577430	5.72	5.93	5.48	0.45	0.123	0.26	FALSE	No_SigChange	5.26	5.93	3.95	1.98	7.38e-08	2.91e-06	TRUE	SigDecrease	4.61	5.48	2	3.48	1.4e-11	4.03e-10	TRUE	SigDecrease	5.02	5.93	2	3.93	2.73e-15	7.73e-14	TRUE	SigDecrease	Intergenic	Intergenic	-90268	NR_045297	Gm17644	0.02974	0.451852	Intergenic	Intergenic	Intergenic	Other
chr1	12586920	12587420	5.42	4.29	6.04	-1.76	3.89e-08	1.21e-06	TRUE	SigIncrease	3.89	4.28	3.36	0.93	0.159	0.248	FALSE	No_SigChange	5.47	6.04	4.52	1.52	4.63e-06	2.9e-05	TRUE	SigDecrease	4.41	4.28	4.52	-0.24	0.552	0.606	FALSE	No_SigChange	Intergenic	RLTR9E|LTR|ERVK	-80393	NR_045297	Gm17644	0.014028	0.476	RLTR9E	ERVK	LTR	LTR
chr1	12636870	12637030	4.48	4.3	4.63	-0.33	0.385	0.571	FALSE	No_SigChange	3.94	4.3	3.46	0.84	0.1	0.175	FALSE	No_SigChange	4.1	4.63	3.25	1.38	0.00917	0.0187	FALSE	No_SigChange	3.87	4.3	3.25	1.05	0.0567	0.0806	FALSE	No_SigChange	Intergenic	Intergenic	-30613	NR_045297	Gm17644	0.012579	0.50625	Intergenic	Intergenic	Intergenic	Other
chr1	12643990	12644350	5.44	5.18	5.66	-0.48	0.164	0.319	FALSE	No_SigChange	4.83	5.18	4.37	0.8	0.0739	0.14	FALSE	No_SigChange	5.36	5.66	4.98	0.68	0.0393	0.064	FALSE	No_SigChange	5.08	5.18	4.98	0.2	0.62	0.67	FALSE	No_SigChange	Intergenic	RLTR20D|LTR|ERVK	-23393	NR_045297	Gm17644	0.013928	0.486111	RLTR20D	ERVK	LTR	LTR
chr1	12670860	12671240	5.74	4.67	6.35	-1.68	1.04e-09	5.4e-08	TRUE	SigIncrease	3.98	4.67	2.58	2.09	0.000504	0.00355	TRUE	SigDecrease	6.18	6.35	5.99	0.35	0.225	0.284	FALSE	No_SigChange	5.48	4.67	5.99	-1.32	0.000194	0.000504	TRUE	SigIncrease	intron	intron (NR_045297, intron 1 of 2)	3487	NR_045297	Gm17644	0.015831	0.452632	intron	intron	intron	Other
chr1	12691800	12693620	9.19	9.11	9.27	-0.16	0.418	0.602	FALSE	No_SigChange	8.68	9.11	8.08	1.03	0.00136	0.0076	TRUE	SigDecrease	8.61	9.27	7.34	1.93	4.7e-12	1.55e-10	TRUE	SigDecrease	8.48	9.11	7.34	1.76	4.92e-11	5.39e-10	TRUE	SigDecrease	intron	intron (NM_001198566, intron 1 of 20)	280	NM_001198566	Sulf1	0.028037	0.490659	intron	intron	intron	Other
chr1	12711160	12711680	6.63	6.52	6.73	-0.21	0.4	0.585	FALSE	No_SigChange	6.26	6.52	5.95	0.57	0.0584	0.117	FALSE	No_SigChange	6.37	6.73	5.89	0.83	0.00326	0.00789	TRUE	SigDecrease	6.24	6.52	5.89	0.62	0.0405	0.0597	FALSE	No_SigChange	intron	intron (NM_001198566, intron 1 of 20)	-7125	NM_172294	Sulf1	0.011561	0.532692	intron	intron	intron	Other
chr1	12718030	12718930	8.15	8.16	8.14	0.02	0.921	0.959	FALSE	No_SigChange	7.66	8.16	6.89	1.27	0.000111	0.00109	TRUE	SigDecrease	7.56	8.14	6.59	1.55	3.79e-09	5.72e-08	TRUE	SigDecrease	7.58	8.16	6.59	1.57	5.19e-08	2.91e-07	TRUE	SigDecrease	promoter-TSS	promoter-TSS (NM_172294)	-65	NM_172294	Sulf1	0.022247	0.515556	promoter-TSS	promoter-TSS	promoter-TSS	Other
chr1	12744310	12745450	9.52	9.61	9.42	0.18	0.32	0.507	FALSE	No_SigChange	8.99	9.6	7.91	1.7	2.53e-12	6.09e-10	TRUE	SigDecrease	8.71	9.42	7.23	2.19	1.05e-12	4.1e-11	TRUE	SigDecrease	8.86	9.6	7.23	2.37	3.67e-15	1.01e-13	TRUE	SigDecrease	intron	intron (NM_172294, intron 2 of 21)	26335	NM_172294	Sulf1	0.007024	0.426316	intron	intron	intron	Other
chr1	12751350	12751610	5.4	4.87	5.79	-0.92	0.014	0.05	FALSE	No_SigChange	4.49	4.87	3.98	0.89	0.0749	0.141	FALSE	No_SigChange	5.05	5.79	3.43	2.37	1.06e-09	1.87e-08	TRUE	SigDecrease	4.32	4.87	3.43	1.44	0.00661	0.0119	FALSE	No_SigChange	intron	Lx5b|LINE|L1	32935	NM_172294	Sulf1	0.003861	0.492308	Lx5b	L1	LINE	LINE
chr1	12795250	12795520	5.38	5.37	5.4	-0.03	0.906	0.95	FALSE	No_SigChange	5.1	5.36	4.77	0.6	0.0724	0.138	FALSE	No_SigChange	4.83	5.4	3.88	1.52	0.000272	0.000961	TRUE	SigDecrease	4.81	5.36	3.88	1.48	0.000514	0.00121	TRUE	SigDecrease	intron	intron (NM_001198566, intron 3 of 20)	76840	NM_172294	Sulf1	0.011152	0.488889	intron	intron	intron	Other
chr1	12807970	12808470	6.27	5.99	6.5	-0.52	0.0563	0.146	FALSE	No_SigChange	5.86	5.99	5.71	0.27	0.325	0.429	FALSE	No_SigChange	6.24	6.5	5.92	0.58	0.0582	0.0894	FALSE	No_SigChange	5.95	5.99	5.92	0.07	0.826	0.854	FALSE	No_SigChange	intron	intron (NM_001198566, intron 6 of 20)	89675	NM_172294	Sulf1	0.026052	0.498	intron	intron	intron	Other
chr1	12811400	12811870	6.03	5.52	6.41	-0.89	0.000559	0.00383	TRUE	SigIncrease	5.14	5.52	4.63	0.89	0.02	0.0542	FALSE	No_SigChange	5.91	6.41	5.14	1.27	8.04e-06	4.66e-05	TRUE	SigDecrease	5.34	5.52	5.14	0.38	0.255	0.309	FALSE	No_SigChange	intron	intron (NM_001198566, intron 6 of 20)	93090	NM_172294	Sulf1	0.014925	0.482979	intron	intron	intron	Other
chr1	12813840	12815270	8.17	8.53	7.67	0.87	0.000146	0.00127	TRUE	SigDecrease	7.81	8.53	6.29	2.25	2.07e-10	2.23e-08	TRUE	SigDecrease	6.81	7.67	4.41	3.26	3.48e-05	0.000165	TRUE	SigDecrease	7.61	8.53	4.41	4.12	1.97e-07	9.77e-07	TRUE	SigDecrease	intron	intron (NM_001198566, intron 6 of 20)	96010	NM_172294	Sulf1	0.011197	0.475524	intron	intron	intron	Other
chr1	12834770	12837240	9.15	9.3	8.99	0.31	0.0967	0.218	FALSE	No_SigChange	8.89	9.3	8.33	0.97	0.000314	0.00246	TRUE	SigDecrease	8.44	8.99	7.56	1.43	1.4e-08	1.8e-07	TRUE	SigDecrease	8.68	9.3	7.56	1.74	2.36e-11	2.76e-10	TRUE	SigDecrease	intron	intron (NM_001198566, intron 11 of 20)	117460	NM_172294	Sulf1	0.020656	0.462348	intron	intron	intron	Other
chr1	12850980	12851240	3.97	2.25	4.73	-2.48	1.57e-06	2.86e-05	TRUE	SigIncrease	1.91	2.25	1.46	0.79	0.418	0.522	FALSE	No_SigChange	5.3	4.73	5.71	-0.99	0.000769	0.00232	TRUE	SigIncrease	4.84	2.25	5.71	-3.47	4.34e-14	9.42e-13	TRUE	SigIncrease	intron	intron (NM_001198566, intron 20 of 20)	132565	NM_172294	Sulf1	0.027027	0.473077	intron	intron	intron	Other
chr1	12864110	12864620	6.18	6.08	6.27	-0.19	0.415	0.599	FALSE	No_SigChange	6.06	6.08	6.05	0.03	0.925	0.948	FALSE	No_SigChange	6	6.27	5.66	0.61	0.0239	0.042	FALSE	No_SigChange	5.88	6.07	5.66	0.42	0.145	0.187	FALSE	No_SigChange	Intergenic	Intergenic	126770	NM_172841	Slco5a1	0.009823	0.42549	Intergenic	Intergenic	Intergenic	Other
chr1	12864990	12865840	7.53	7.4	7.65	-0.25	0.277	0.459	FALSE	No_SigChange	7.39	7.4	7.38	0.02	0.953	0.968	FALSE	No_SigChange	7.37	7.65	7.04	0.61	0.0228	0.0403	FALSE	No_SigChange	7.23	7.4	7.04	0.36	0.177	0.223	FALSE	No_SigChange	Intergenic	Intergenic	125720	NM_172841	Slco5a1	0.028269	0.52	Intergenic	Intergenic	Intergenic	Other
chr1	12875510	12875830	5.27	5.24	5.29	-0.06	0.856	0.922	FALSE	No_SigChange	5.09	5.24	4.93	0.31	0.399	0.503	FALSE	No_SigChange	5.29	5.29	5.29	0	0.996	0.998	FALSE	No_SigChange	5.27	5.24	5.29	-0.06	0.861	0.884	FALSE	No_SigChange	intron	G-rich|Low_complexity|Low_complexity	115465	NM_172841	Slco5a1	0.062696	0.528125	G-rich	Low_complexity	Low_complexity	Other
chr1	12930960	12931120	4.22	4.09	4.34	-0.25	0.586	0.743	FALSE	No_SigChange	4	4.09	3.91	0.18	0.76	0.821	FALSE	No_SigChange	3.75	4.34	2.75	1.58	0.00338	0.00814	TRUE	SigDecrease	3.57	4.09	2.75	1.33	0.0413	0.0607	FALSE	No_SigChange	intron	RLTR9A|LTR|ERVK	60095	NM_172841	Slco5a1	0	0.48125	RLTR9A	ERVK	LTR	LTR
chr1	12990070	12993150	10.4	10.45	10.35	0.1	0.602	0.755	FALSE	No_SigChange	10.15	10.45	9.78	0.67	0.00722	0.0261	FALSE	No_SigChange	9.93	10.35	9.34	1.01	5.05e-05	0.000227	TRUE	SigDecrease	10	10.45	9.34	1.11	4.85e-06	1.79e-05	TRUE	SigDecrease	promoter-TSS	promoter-TSS (NM_172841)	-475	NM_172841	Slco5a1	0.055538	0.564935	promoter-TSS	promoter-TSS	promoter-TSS	Other
chr1	12997380	12997750	5.45	5.28	5.61	-0.33	0.259	0.439	FALSE	No_SigChange	5.45	5.27	5.61	-0.33	0.344	0.449	FALSE	No_SigChange	5.38	5.6	5.12	0.49	0.0775	0.114	FALSE	No_SigChange	5.2	5.27	5.12	0.16	0.637	0.685	FALSE	No_SigChange	Intergenic	Intergenic	-6430	NM_172841	Slco5a1	0.02168	0.508108	Intergenic	Intergenic	Intergenic	Other
chr1	13015010	13016160	6.85	5.69	7.49	-1.79	3.41e-14	6.72e-12	TRUE	SigIncrease	6.21	5.69	6.59	-0.9	0.00671	0.0248	FALSE	No_SigChange	7.68	7.49	7.85	-0.37	0.147	0.197	FALSE	No_SigChange	7.14	5.69	7.85	-2.16	2.33e-14	5.37e-13	TRUE	SigIncrease	Intergenic	IAPEY3_LTR|LTR|ERVK	-24450	NM_172841	Slco5a1	0.020888	0.463478	IAPEY3_LTR	ERVK	LTR	LTR
chr1	13029070	13029660	5.87	4.88	6.45	-1.57	1e-07	2.72e-06	TRUE	SigIncrease	5.22	4.88	5.49	-0.61	0.092	0.164	FALSE	No_SigChange	6.12	6.45	5.69	0.76	0.00467	0.0106	FALSE	No_SigChange	5.34	4.88	5.69	-0.81	0.0261	0.0404	FALSE	No_SigChange	Intergenic	RMER17B2|LTR|ERVK	-38230	NM_172841	Slco5a1	0.023769	0.574576	RMER17B2	ERVK	LTR	LTR
chr1	13050150	13050530	5.49	5.48	5.51	-0.03	0.923	0.96	FALSE	No_SigChange	5.52	5.47	5.57	-0.1	0.798	0.851	FALSE	No_SigChange	5.46	5.51	5.42	0.09	0.763	0.803	FALSE	No_SigChange	5.45	5.47	5.42	0.06	0.873	0.894	FALSE	No_SigChange	Intergenic	Intergenic	-59205	NM_172841	Slco5a1	0.034301	0.457895	Intergenic	Intergenic	Intergenic	Other
chr1	13052150	13052560	6.77	6.64	6.89	-0.24	0.295	0.48	FALSE	No_SigChange	6.41	6.64	6.14	0.5	0.0921	0.164	FALSE	No_SigChange	6.63	6.88	6.33	0.56	0.0702	0.105	FALSE	No_SigChange	6.49	6.64	6.33	0.32	0.288	0.344	FALSE	No_SigChange	Intergenic	Intergenic	-61220	NM_172841	Slco5a1	0.01956	0.519512	Intergenic	Intergenic	Intergenic	Other
chr1	13069480	13070050	6.54	6.37	6.7	-0.33	0.191	0.355	FALSE	No_SigChange	6.31	6.36	6.24	0.12	0.716	0.785	FALSE	No_SigChange	6.59	6.7	6.46	0.24	0.4	0.465	FALSE	No_SigChange	6.41	6.36	6.46	-0.1	0.697	0.739	FALSE	No_SigChange	Intergenic	MTC|LTR|ERVL-MaLR	57398	NM_001081209	Prdm14	0.015817	0.522807	MTC	ERVL-MaLR	LTR	LTR
chr1	13071340	13071570	4.83	3.78	5.43	-1.64	4.62e-05	0.000492	TRUE	SigIncrease	4.25	3.78	4.6	-0.82	0.073	0.138	FALSE	No_SigChange	5.46	5.42	5.5	-0.08	0.834	0.864	FALSE	No_SigChange	4.88	3.78	5.5	-1.72	1.29e-05	4.36e-05	TRUE	SigIncrease	Intergenic	RMER17C2|LTR|ERVK	55708	NM_001081209	Prdm14	0	0.53913	RMER17C2	ERVK	LTR	LTR
chr1	13073940	13074960	7.19	6.6	7.61	-1.01	1.93e-06	3.41e-05	TRUE	SigIncrease	6.22	6.6	5.71	0.88	0.141	0.227	FALSE	No_SigChange	7.38	7.61	7.11	0.5	0.0712	0.106	FALSE	No_SigChange	6.88	6.6	7.11	-0.51	0.072	0.0999	FALSE	No_SigChange	Intergenic	(A)n|Simple_repeat|Simple_repeat	52713	NM_001081209	Prdm14	0.011776	0.420588	(A)n	Simple_repeat	Simple_repeat	Other
chr1	13076410	13076610	4.23	4.02	4.41	-0.39	0.357	0.545	FALSE	No_SigChange	4.12	4.02	4.21	-0.19	0.679	0.755	FALSE	No_SigChange	4.58	4.41	4.73	-0.32	0.48	0.544	FALSE	No_SigChange	4.42	4.02	4.73	-0.71	0.142	0.183	FALSE	No_SigChange	Intergenic	Intergenic	50653	NM_001081209	Prdm14	0.045226	0.57	Intergenic	Intergenic	Intergenic	Other
chr1	13078390	13078640	4.73	3.83	5.28	-1.44	0.031	0.0924	FALSE	No_SigChange	4.66	3.83	5.18	-1.35	0.00973	0.0325	FALSE	No_SigChange	5.4	5.27	5.51	-0.24	0.451	0.515	FALSE	No_SigChange	4.91	3.83	5.51	-1.68	0.0237	0.0371	FALSE	No_SigChange	Intergenic	Intergenic	48648	NM_001081209	Prdm14	0.012048	0.484	Intergenic	Intergenic	Intergenic	Other
chr1	13081050	13081350	4.95	3.91	5.55	-1.65	7.78e-06	0.000111	TRUE	SigIncrease	3.96	3.91	4.02	-0.12	0.826	0.873	FALSE	No_SigChange	5.12	5.55	4.49	1.06	0.00313	0.00762	TRUE	SigDecrease	4.23	3.9	4.49	-0.59	0.245	0.297	FALSE	No_SigChange	Intergenic	Intergenic	45963	NM_001081209	Prdm14	0.010033	0.5	Intergenic	Intergenic	Intergenic	Other
chr1	13084600	13085540	8.22	7.72	8.59	-0.87	0.000154	0.00132	TRUE	SigIncrease	7.3	7.72	6.71	1.01	0.000705	0.0046	TRUE	SigDecrease	8.16	8.59	7.53	1.07	0.000504	0.00163	TRUE	SigDecrease	7.63	7.72	7.53	0.19	0.521	0.577	FALSE	No_SigChange	Intergenic	Intergenic	42093	NM_001081209	Prdm14	0.00426	0.444681	Intergenic	Intergenic	Intergenic	Other
chr1	13094910	13096200	7.25	7.07	7.4	-0.32	0.242	0.419	FALSE	No_SigChange	6.59	7.07	5.87	1.2	0.000181	0.00161	TRUE	SigDecrease	6.96	7.4	6.33	1.06	6.81e-05	0.000294	TRUE	SigDecrease	6.75	7.07	6.33	0.74	0.0179	0.0289	FALSE	No_SigChange	Intergenic	Intergenic	31608	NM_001081209	Prdm14	0.008534	0.455039	Intergenic	Intergenic	Intergenic	Other
chr1	13103500	13104570	7.75	7.72	7.77	-0.05	0.83	0.907	FALSE	No_SigChange	7.49	7.72	7.21	0.51	0.0465	0.0995	FALSE	No_SigChange	7.26	7.77	6.48	1.29	4.54e-05	0.000207	TRUE	SigDecrease	7.23	7.72	6.48	1.24	1.28e-05	4.32e-05	TRUE	SigDecrease	Intergenic	Intergenic	23128	NM_001081209	Prdm14	0.028064	0.508411	Intergenic	Intergenic	Intergenic	Other
chr1	13117880	13118090	5.11	5.25	4.97	0.28	0.364	0.552	FALSE	No_SigChange	4.66	5.25	3.64	1.6	7.87e-05	0.000834	TRUE	SigDecrease	4.84	4.96	4.71	0.25	0.478	0.542	FALSE	No_SigChange	5	5.25	4.71	0.53	0.113	0.15	FALSE	No_SigChange	intron	B3A|SINE|B2	9178	NM_001081209	Prdm14	0.014354	0.514286	B3A	B2	SINE	SINE
chr1	13125130	13128740	9.14	9.4	8.81	0.59	0.00619	0.0264	FALSE	No_SigChange	9.13	9.4	8.8	0.6	0.0355	0.0818	FALSE	No_SigChange	8.47	8.81	8.01	0.8	0.0019	0.005	TRUE	SigDecrease	8.87	9.4	8.01	1.39	5.58e-08	3.11e-07	TRUE	SigDecrease	intron	intron (NM_001081209, intron 1 of 7)	228	NM_001081209	Prdm14	0.041009	0.529917	intron	intron	intron	Other
chr1	13132140	13132420	6.09	6.11	6.07	0.05	0.846	0.916	FALSE	No_SigChange	6.1	6.11	6.08	0.03	0.915	0.94	FALSE	No_SigChange	6.31	6.06	6.53	-0.46	0.0761	0.112	FALSE	No_SigChange	6.33	6.11	6.53	-0.42	0.0989	0.133	FALSE	No_SigChange	Intergenic	Intergenic	-5117	NM_001081209	Prdm14	0.003584	0.471429	Intergenic	Intergenic	Intergenic	Other
chr1	13134260	13134740	6.62	6.66	6.57	0.09	0.715	0.834	FALSE	No_SigChange	6.45	6.66	6.21	0.45	0.103	0.179	FALSE	No_SigChange	6.29	6.57	5.93	0.64	0.0124	0.0241	FALSE	No_SigChange	6.34	6.66	5.93	0.73	0.00403	0.00763	TRUE	SigDecrease	Intergenic	Intergenic	-7337	NM_001081209	Prdm14	0.006263	0.49375	Intergenic	Intergenic	Intergenic	Other
chr1	13142680	13143260	6.24	5.87	6.53	-0.66	0.00749	0.0307	FALSE	No_SigChange	5.77	5.87	5.66	0.21	0.542	0.637	FALSE	No_SigChange	6.15	6.53	5.64	0.9	0.000562	0.00178	TRUE	SigDecrease	5.76	5.87	5.64	0.23	0.458	0.515	FALSE	No_SigChange	intron	intron (NM_001077695, intron 21 of 21)	-15807	NM_001081209	Prdm14	0.025907	0.498276	intron	intron	intron	Other
chr1	13151130	13151450	5.46	5.37	5.55	-0.18	0.51	0.683	FALSE	No_SigChange	4.77	5.36	3.73	1.64	9.02e-06	0.000147	TRUE	SigDecrease	5.25	5.54	4.88	0.66	0.0571	0.0878	FALSE	No_SigChange	5.14	5.36	4.88	0.48	0.186	0.233	FALSE	No_SigChange	intron	B3A|SINE|B2	-24127	NM_001081209	Prdm14	0.012539	0.459375	B3A	B2	SINE	SINE
chr1	13189190	13189480	4.89	3.86	5.48	-1.63	5.25e-05	0.000547	TRUE	SigIncrease	3.54	3.86	3.13	0.73	0.218	0.315	FALSE	No_SigChange	4.99	5.48	4.25	1.23	0.00113	0.00321	TRUE	SigDecrease	4.06	3.86	4.25	-0.39	0.469	0.526	FALSE	No_SigChange	intron	intron (NM_001077695, intron 5 of 21)	-62172	NM_001081209	Prdm14	0.027682	0.468966	intron	intron	intron	Other
chr1	13216290	13216600	5.43	5.6	5.25	0.35	0.262	0.442	FALSE	No_SigChange	5.29	5.6	4.91	0.69	0.0662	0.129	FALSE	No_SigChange	4.87	5.25	4.37	0.87	0.00932	0.019	FALSE	No_SigChange	5.11	5.6	4.37	1.22	0.000764	0.00172	TRUE	SigDecrease	intron	intron (NM_001077695, intron 4 of 21)	-89282	NM_001081209	Prdm14	0.016181	0.503226	intron	intron	intron	Other
chr1	13259390	13259990	6.17	6.41	5.88	0.53	0.0645	0.161	FALSE	No_SigChange	6.64	6.41	6.84	-0.42	0.146	0.232	FALSE	No_SigChange	6.16	5.88	6.4	-0.52	0.0622	0.0944	FALSE	No_SigChange	6.4	6.41	6.4	0.02	0.956	0.965	FALSE	No_SigChange	intron	intron (NM_001077695, intron 2 of 21)	114393	NM_008678	Ncoa2	0.021703	0.518333	intron	intron	intron	Other
chr1	13308790	13309230	6.69	6.67	6.72	-0.06	0.783	0.879	FALSE	No_SigChange	6.34	6.66	5.91	0.75	0.00319	0.0144	FALSE	No_SigChange	6.51	6.72	6.26	0.46	0.0419	0.0675	FALSE	No_SigChange	6.48	6.66	6.26	0.4	0.0847	0.115	FALSE	No_SigChange	intron	intron (NM_001077695, intron 1 of 21)	65073	NM_008678	Ncoa2	0.013667	0.436364	intron	intron	intron	Other
chr1	13360770	13361140	6.35	5.77	6.76	-1	3.46e-05	0.000387	TRUE	SigIncrease	5.49	5.77	5.15	0.62	0.0372	0.0846	FALSE	No_SigChange	6.54	6.76	6.27	0.49	0.0576	0.0885	FALSE	No_SigChange	6.04	5.77	6.27	-0.5	0.0647	0.0907	FALSE	No_SigChange	intron	RLTR12BD_Mm|LTR|ERVK	13128	NM_008678	Ncoa2	0.01084	0.527027	RLTR12BD_Mm	ERVK	LTR	LTR
chr1	13372080	13374840	10.89	10.85	10.92	-0.07	0.725	0.841	FALSE	No_SigChange	10.62	10.85	10.34	0.51	0.0493	0.104	FALSE	No_SigChange	10.62	10.92	10.24	0.68	0.00709	0.0151	FALSE	No_SigChange	10.58	10.85	10.24	0.61	0.00729	0.013	FALSE	No_SigChange	intron	CpG	623	NM_008678	Ncoa2	0.097499	0.70471	CpG	CpG	CpG	Other
chr1	13390220	13390400	5.21	4.94	5.43	-0.49	0.0986	0.221	FALSE	No_SigChange	4.72	4.94	4.46	0.48	0.25	0.351	FALSE	No_SigChange	4.96	5.43	4.25	1.19	0.000506	0.00163	TRUE	SigDecrease	4.63	4.94	4.25	0.69	0.067	0.0936	FALSE	No_SigChange	Intergenic	ID_B1|SINE|B4	-16227	NM_001077695	Ncoa2	0.005587	0.516667	ID_B1	B4	SINE	SINE
chr1	13391890	13392090	4.59	4.85	4.29	0.56	0.207	0.377	FALSE	No_SigChange	4.42	4.84	3.81	1.04	0.0155	0.0452	FALSE	No_SigChange	3.6	4.28	2.25	2.04	0.000745	0.00227	TRUE	SigDecrease	4.06	4.84	2.25	2.6	1.09e-06	4.64e-06	TRUE	SigDecrease	Intergenic	ID_B1|SINE|B4	-17907	NM_001077695	Ncoa2	0.01005	0.52	ID_B1	B4	SINE	SINE
chr1	13426440	13427390	7.48	7.49	7.47	0.03	0.901	0.948	FALSE	No_SigChange	7.33	7.49	7.15	0.34	0.23	0.329	FALSE	No_SigChange	7.24	7.46	6.99	0.48	0.0683	0.102	FALSE	No_SigChange	7.26	7.49	6.99	0.5	0.0484	0.07	FALSE	No_SigChange	Intergenic	Intergenic	-52832	NM_001077695	Ncoa2	0.031612	0.505263	Intergenic	Intergenic	Intergenic	Other
chr1	13496390	13496840	6.77	6.91	6.61	0.3	0.24	0.417	FALSE	No_SigChange	6.83	6.91	6.75	0.16	0.539	0.634	FALSE	No_SigChange	6.39	6.61	6.12	0.49	0.135	0.183	FALSE	No_SigChange	6.57	6.91	6.12	0.79	0.0163	0.0266	FALSE	No_SigChange	Intergenic	B4A|SINE|B4	93249	NM_028173	Tram1	0.004454	0.428889	B4A	B4	SINE	SINE
chr1	13500640	13500830	5.37	5.48	5.24	0.25	0.374	0.561	FALSE	No_SigChange	5.12	5.48	4.64	0.84	0.0243	0.0625	FALSE	No_SigChange	4.8	5.24	4.17	1.07	0.00214	0.00552	TRUE	SigDecrease	4.97	5.48	4.17	1.31	0.000168	0.000444	TRUE	SigDecrease	Intergenic	Intergenic	89129	NM_028173	Tram1	0.015873	0.505263	Intergenic	Intergenic	Intergenic	Other
chr1	13513960	13514290	5.24	2.64	6.11	-3.47	1.14e-15	3.33e-13	TRUE	SigIncrease	2.91	2.64	3.13	-0.49	0.522	0.619	FALSE	No_SigChange	5.62	6.11	4.87	1.24	6.25e-05	0.000273	TRUE	SigDecrease	4.15	2.64	4.87	-2.23	2.84e-05	8.9e-05	TRUE	SigIncrease	Intergenic	MuRRS-int|LTR|ERV1	75739	NM_028173	Tram1	0.033435	0.624242	MuRRS-int	ERV1	LTR	LTR
chr1	13525420	13525600	4.97	4.78	5.14	-0.36	0.285	0.469	FALSE	No_SigChange	4.87	4.78	4.95	-0.17	0.632	0.716	FALSE	No_SigChange	5.07	5.14	5	0.14	0.651	0.703	FALSE	No_SigChange	4.89	4.78	5	-0.22	0.541	0.595	FALSE	No_SigChange	Intergenic	RLTR9B2|LTR|ERVK	64354	NM_028173	Tram1	0.005587	0.511111	RLTR9B2	ERVK	LTR	LTR
chr1	13531350	13531770	6.27	6.28	6.26	0.02	0.945	0.972	FALSE	No_SigChange	6.3	6.28	6.32	-0.04	0.88	0.915	FALSE	No_SigChange	6.25	6.26	6.24	0.02	0.94	0.952	FALSE	No_SigChange	6.26	6.28	6.24	0.04	0.877	0.898	FALSE	No_SigChange	Intergenic	(TTTTG)n|Simple_repeat|Simple_repeat	58304	NM_028173	Tram1	0.026253	0.457143	(TTTTG)n	Simple_repeat	Simple_repeat	Other
chr1	13533130	13533510	5.57	5.86	5.19	0.67	0.0591	0.151	FALSE	No_SigChange	5.59	5.86	5.26	0.61	0.135	0.219	FALSE	No_SigChange	4.8	5.19	4.27	0.92	0.0221	0.0393	FALSE	No_SigChange	5.27	5.86	4.27	1.6	0.000128	0.000345	TRUE	SigDecrease	Intergenic	Intergenic	56544	NM_028173	Tram1	0.021108	0.560526	Intergenic	Intergenic	Intergenic	Other
chr1	13535070	13535330	4.75	3.55	5.4	-1.85	3.87e-06	6.15e-05	TRUE	SigIncrease	4.1	3.55	4.49	-0.94	0.0602	0.12	FALSE	No_SigChange	5.87	5.4	6.22	-0.82	0.00214	0.00553	TRUE	SigIncrease	5.43	3.55	6.22	-2.67	1.42e-13	2.75e-12	TRUE	SigIncrease	Intergenic	Intergenic	54664	NM_028173	Tram1	0.023166	0.507692	Intergenic	Intergenic	Intergenic	Other
chr1	13589150	13590540	9.35	9.27	9.43	-0.16	0.428	0.611	FALSE	No_SigChange	9.07	9.27	8.83	0.44	0.106	0.182	FALSE	No_SigChange	9.18	9.43	8.88	0.55	0.0307	0.0519	FALSE	No_SigChange	9.09	9.27	8.88	0.39	0.101	0.135	FALSE	No_SigChange	promoter-TSS	promoter-TSS (NM_028173)	19	NM_028173	Tram1	0.092873	0.641007	promoter-TSS	promoter-TSS	promoter-TSS	Other
chr1	13599860	13600130	5.56	6.01	4.91	1.1	0.000448	0.0032	TRUE	SigDecrease	5.54	6.01	4.83	1.18	0.000304	0.0024	TRUE	SigDecrease	4.55	4.9	4.07	0.84	0.0596	0.0911	FALSE	No_SigChange	5.34	6.01	4.07	1.94	1.99e-06	8e-06	TRUE	SigDecrease	Intergenic	MER65D|LTR|ERV1	-10131	NM_028173	Tram1	0.003717	0.5	MER65D	ERV1	LTR	LTR
chr1	13606740	13606990	4.67	4.81	4.51	0.3	0.678	0.809	FALSE	No_SigChange	4.37	4.81	3.73	1.08	0.0247	0.0632	FALSE	No_SigChange	5.15	4.51	5.6	-1.09	0.0741	0.11	FALSE	No_SigChange	5.26	4.81	5.6	-0.79	0.0255	0.0396	FALSE	No_SigChange	Intergenic	MT2A|LTR|ERVL	-17001	NM_028173	Tram1	0.008032	0.508	MT2A	ERVL	LTR	LTR
chr1	13621880	13622070	4.35	4.61	4.02	0.59	0.137	0.282	FALSE	No_SigChange	4.14	4.61	3.43	1.19	0.00877	0.0302	FALSE	No_SigChange	3.75	4.02	3.43	0.59	0.264	0.326	FALSE	No_SigChange	4.14	4.61	3.43	1.19	0.0178	0.0287	FALSE	No_SigChange	Intergenic	ERVB7_3-LTR_MM|LTR|ERVK	-32111	NM_028173	Tram1	0.042328	0.521053	ERVB7_3-LTR_MM	ERVK	LTR	LTR
chr1	13659760	13661000	9.37	9.37	9.36	0.02	0.927	0.962	FALSE	No_SigChange	9.21	9.37	9.02	0.36	0.151	0.239	FALSE	No_SigChange	9.07	9.36	8.72	0.63	0.00724	0.0154	FALSE	No_SigChange	9.08	9.37	8.72	0.65	0.0033	0.00637	TRUE	SigDecrease	exon	exon (NM_145381, exon 1 of 7)	129	NM_145381	Lactb2	0.050847	0.546774	exon	exon	exon	Other
chr1	13697720	13697930	2.49	3.36	0	3.36	0.000701	0.00461	TRUE	SigDecrease	3.74	3.36	4.04	-0.69	0.17	0.261	FALSE	No_SigChange	3.02	0	3.93	-3.93	1.51e-05	8.05e-05	TRUE	SigIncrease	3.67	3.36	3.93	-0.57	0.286	0.341	FALSE	No_SigChange	intron	intron (NM_001011873, intron 3 of 3)	29054	NM_001011873	Xkr9	0	0.371429	intron	intron	intron	Other
chr1	13706290	13706560	5.33	5.04	5.57	-0.53	0.0944	0.214	FALSE	No_SigChange	4.92	5.04	4.79	0.25	0.509	0.608	FALSE	No_SigChange	5.4	5.57	5.21	0.36	0.216	0.273	FALSE	No_SigChange	5.13	5.04	5.21	-0.17	0.635	0.683	FALSE	No_SigChange	Intergenic	MER5A|DNA|hAT-Charlie	37654	NM_001011873	Xkr9	0.018587	0.481481	MER5A	hAT-Charlie	DNA	Other
chr1	13784530	13784820	5.55	5.37	5.71	-0.34	0.205	0.375	FALSE	No_SigChange	5.28	5.36	5.19	0.18	0.607	0.694	FALSE	No_SigChange	5.43	5.7	5.1	0.61	0.0558	0.0861	FALSE	No_SigChange	5.24	5.36	5.1	0.27	0.422	0.48	FALSE	No_SigChange	Intergenic	Intergenic	2254	NR_004447	Gm5523	0.013841	0.375862	Intergenic	Intergenic	Intergenic	Other
chr1	13789360	13789810	6.61	6.75	6.46	0.28	0.204	0.374	FALSE	No_SigChange	6.74	6.75	6.72	0.02	0.935	0.955	FALSE	No_SigChange	6.63	6.46	6.77	-0.31	0.225	0.283	FALSE	No_SigChange	6.76	6.75	6.77	-0.03	0.911	0.926	FALSE	No_SigChange	Intergenic	Intergenic	-2656	NR_004447	Gm5523	0.022272	0.466667	Intergenic	Intergenic	Intergenic	Other
chr1	13839820	13840050	4.58	4.11	4.93	-0.82	0.0492	0.131	FALSE	No_SigChange	3.88	4.11	3.61	0.49	0.335	0.439	FALSE	No_SigChange	5.08	4.93	5.21	-0.28	0.448	0.513	FALSE	No_SigChange	4.76	4.11	5.21	-1.1	0.007	0.0125	FALSE	No_SigChange	Intergenic	B3|SINE|B2	-53006	NR_004447	Gm5523	0.004367	0.456522	B3	B2	SINE	SINE
chr1	14097800	14098190	6.04	5.76	6.27	-0.51	0.0322	0.0952	FALSE	No_SigChange	5.6	5.76	5.41	0.35	0.253	0.354	FALSE	No_SigChange	5.86	6.26	5.3	0.96	0.000676	0.00208	TRUE	SigDecrease	5.55	5.76	5.3	0.46	0.142	0.183	FALSE	No_SigChange	Intergenic	Intergenic	212204	NM_001252192	Eya1	0.005141	0.464103	Intergenic	Intergenic	Intergenic	Other
chr1	14173310	14173480	4.62	4.07	5.02	-0.96	0.00905	0.0357	FALSE	No_SigChange	4.16	4.06	4.25	-0.18	0.71	0.78	FALSE	No_SigChange	4.69	5.02	4.27	0.75	0.0716	0.106	FALSE	No_SigChange	4.17	4.06	4.27	-0.2	0.684	0.728	FALSE	No_SigChange	intron	intron (NM_010164, intron 17 of 17)	136804	NM_001252192	Eya1	0.005917	0.464706	intron	intron	intron	Other
chr1	14177200	14177550	5.43	5.64	5.19	0.45	0.144	0.291	FALSE	No_SigChange	5.33	5.63	4.94	0.69	0.0643	0.126	FALSE	No_SigChange	4.51	5.19	3.17	2.02	1.59e-06	1.14e-05	TRUE	SigDecrease	4.87	5.63	3.17	2.47	1.71e-08	1.07e-07	TRUE	SigDecrease	intron	intron (NM_010164, intron 17 of 17)	132824	NM_001252192	Eya1	0.002865	0.482857	intron	intron	intron	Other
chr1	14181680	14182110	5.75	5.56	5.92	-0.36	0.283	0.467	FALSE	No_SigChange	4.99	5.56	4.04	1.52	0.000354	0.00269	TRUE	SigDecrease	5.66	5.92	5.34	0.58	0.0332	0.0555	FALSE	No_SigChange	5.45	5.56	5.34	0.22	0.555	0.609	FALSE	No_SigChange	intron	intron (NM_010164, intron 16 of 17)	128304	NM_001252192	Eya1	0.009324	0.525581	intron	intron	intron	Other
chr1	14186210	14187070	6.71	6.17	7.11	-0.93	4.07e-05	0.000443	TRUE	SigIncrease	5.53	6.17	4.32	1.85	8.23e-06	0.000136	TRUE	SigDecrease	6.53	7.1	5.55	1.55	8.97e-07	6.9e-06	TRUE	SigDecrease	5.9	6.17	5.55	0.62	0.0668	0.0934	FALSE	No_SigChange	intron	intron (NM_010164, intron 12 of 17)	123559	NM_001252192	Eya1	0.005821	0.419767	intron	intron	intron	Other
chr1	14225560	14225740	5.28	5.18	5.37	-0.2	0.509	0.682	FALSE	No_SigChange	4.53	5.18	3.32	1.86	6.76e-06	0.000116	TRUE	SigDecrease	5.03	5.37	4.57	0.8	0.018	0.0331	FALSE	No_SigChange	4.91	5.18	4.57	0.61	0.0939	0.127	FALSE	No_SigChange	intron	intron (NM_010164, intron 11 of 17)	84549	NM_001252192	Eya1	0.005587	0.461111	intron	intron	intron	Other
chr1	14288150	14288530	5.61	4.61	6.19	-1.58	5.92e-08	1.74e-06	TRUE	SigIncrease	4.84	4.61	5.03	-0.42	0.233	0.332	FALSE	No_SigChange	5.88	6.19	5.49	0.7	0.0332	0.0554	FALSE	No_SigChange	5.12	4.61	5.49	-0.88	0.0195	0.0312	FALSE	No_SigChange	intron	intron (NM_001252192, intron 2 of 16)	21859	NM_001252192	Eya1	0.015831	0.518421	intron	intron	intron	Other
chr1	14291860	14292680	7.27	7.4	7.13	0.28	0.205	0.375	FALSE	No_SigChange	7.24	7.4	7.06	0.34	0.18	0.272	FALSE	No_SigChange	6.87	7.13	6.57	0.56	0.0441	0.0706	FALSE	No_SigChange	7.04	7.4	6.57	0.84	0.00195	0.00398	TRUE	SigDecrease	intron	intron (NM_001252192, intron 2 of 16)	17929	NM_001252192	Eya1	0.003663	0.463415	intron	intron	intron	Other
chr1	14294360	14294780	5.93	5.65	6.16	-0.51	0.049	0.131	FALSE	No_SigChange	5.36	5.65	4.99	0.66	0.0518	0.108	FALSE	No_SigChange	5.97	6.16	5.75	0.41	0.173	0.226	FALSE	No_SigChange	5.7	5.65	5.75	-0.1	0.775	0.809	FALSE	No_SigChange	intron	intron (NM_001252192, intron 2 of 16)	15629	NM_001252192	Eya1	0.016706	0.483333	intron	intron	intron	Other
chr1	14309510	14310470	8.26	8.18	8.34	-0.16	0.439	0.621	FALSE	No_SigChange	8	8.18	7.79	0.4	0.0635	0.125	FALSE	No_SigChange	7.93	8.34	7.38	0.96	0.000587	0.00185	TRUE	SigDecrease	7.83	8.18	7.38	0.8	0.00241	0.00481	TRUE	SigDecrease	5'UTR	5' UTR (NM_001252192, exon 1 of 17)	209	NM_001252192	Eya1	0.052138	0.521875	5'UTR	5'UTR	5'UTR	Other
chr1	14312520	14312830	5.63	4.92	6.1	-1.18	5.55e-05	0.000573	TRUE	SigIncrease	3.99	4.92	0.58	4.33	2.51e-09	1.77e-07	TRUE	SigDecrease	5.45	6.1	4.25	1.85	2.79e-08	3.3e-07	TRUE	SigDecrease	4.62	4.92	4.25	0.67	0.104	0.139	FALSE	No_SigChange	Intergenic	Intergenic	-2476	NM_010164	Eya1	0.012945	0.412903	Intergenic	Intergenic	Intergenic	Other
chr1	14363290	14363560	4.65	3.32	5.33	-2.01	9.62e-07	1.89e-05	TRUE	SigIncrease	3.47	3.32	3.61	-0.29	0.646	0.728	FALSE	No_SigChange	5.06	5.33	4.74	0.59	0.0522	0.0814	FALSE	No_SigChange	4.2	3.32	4.74	-1.42	0.00305	0.00594	TRUE	SigIncrease	Intergenic	RLTR26_Mus|LTR|ERVK	-53226	NM_010164	Eya1	0.01487	0.522222	RLTR26_Mus	ERVK	LTR	LTR
chr1	14484130	14484530	3.91	4.15	3.61	0.54	0.293	0.477	FALSE	No_SigChange	4.65	4.15	5.02	-0.87	0.0481	0.102	FALSE	No_SigChange	4.84	3.61	5.5	-1.89	3.02e-07	2.66e-06	TRUE	SigIncrease	4.98	4.15	5.5	-1.35	0.000406	0.00098	TRUE	SigIncrease	Intergenic	Lx8|LINE|L1	-174131	NM_010164	Eya1	0.010025	0.4725	Lx8	L1	LINE	LINE
chr1	14496430	14496910	5.93	4.49	6.64	-2.14	4.49e-14	8.54e-12	TRUE	SigIncrease	4.54	4.49	4.58	-0.09	0.799	0.852	FALSE	No_SigChange	6.55	6.63	6.45	0.18	0.501	0.563	FALSE	No_SigChange	5.78	4.49	6.45	-1.96	9.87e-11	1.01e-09	TRUE	SigIncrease	Intergenic	CT-rich|Low_complexity|Low_complexity	-186471	NM_010164	Eya1	0.020877	0.477083	CT-rich	Low_complexity	Low_complexity	Other
chr1	14498080	14498400	5.06	4.88	5.22	-0.34	0.28	0.463	FALSE	No_SigChange	5.04	4.88	5.18	-0.3	0.405	0.509	FALSE	No_SigChange	5.3	5.22	5.37	-0.16	0.609	0.664	FALSE	No_SigChange	5.15	4.88	5.37	-0.49	0.135	0.175	FALSE	No_SigChange	Intergenic	Intergenic	-188041	NM_010164	Eya1	0.012539	0.509375	Intergenic	Intergenic	Intergenic	Other
chr1	14504530	14504780	5.07	5.24	4.88	0.36	0.271	0.453	FALSE	No_SigChange	4.83	5.24	4.27	0.97	0.0105	0.0345	FALSE	No_SigChange	4.49	4.88	3.95	0.93	0.0158	0.0297	FALSE	No_SigChange	4.73	5.24	3.95	1.28	0.0011	0.00239	TRUE	SigDecrease	Intergenic	Intergenic	-194456	NM_010164	Eya1	0.02008	0.496	Intergenic	Intergenic	Intergenic	Other
chr1	14506260	14507490	8.56	8.82	8.26	0.56	0.0104	0.0399	FALSE	No_SigChange	8.61	8.81	8.38	0.43	0.127	0.209	FALSE	No_SigChange	7.99	8.26	7.65	0.6	0.0324	0.0542	FALSE	No_SigChange	8.35	8.81	7.65	1.16	2.69e-05	8.49e-05	TRUE	SigDecrease	Intergenic	CpG	-196676	NM_010164	Eya1	0.052075	0.597561	CpG	CpG	CpG	Other
chr1	14508670	14508920	4.32	4.91	3.32	1.59	0.00021	0.00171	TRUE	SigDecrease	4.43	4.91	3.73	1.18	0.00636	0.0238	FALSE	No_SigChange	2.52	3.32	0.58	2.74	0.00182	0.00483	TRUE	SigDecrease	3.97	4.9	0.58	4.32	1.58e-09	1.24e-08	TRUE	SigDecrease	Intergenic	Intergenic	-198596	NM_010164	Eya1	0.016064	0.424	Intergenic	Intergenic	Intergenic	Other
chr1	14650540	14650990	6.1	6.33	5.83	0.49	0.0567	0.146	FALSE	No_SigChange	5.88	6.32	5.25	1.08	0.000969	0.00587	TRUE	SigDecrease	5.18	5.83	3.95	1.88	0.00422	0.00977	TRUE	SigDecrease	5.58	6.32	3.95	2.37	0.000213	0.00055	TRUE	SigDecrease	Intergenic	BGLII|LTR|ERVK	105201	NM_010827	Msc	0.008909	0.484444	BGLII	ERVK	LTR	LTR
chr1	14739690	14740340	7.15	6.84	7.41	-0.57	0.0179	0.0608	FALSE	No_SigChange	6.98	6.84	7.1	-0.26	0.308	0.412	FALSE	No_SigChange	7.22	7.41	7.02	0.39	0.104	0.146	FALSE	No_SigChange	6.93	6.84	7.02	-0.18	0.473	0.53	FALSE	No_SigChange	Intergenic	Intergenic	15951	NM_010827	Msc	0.023112	0.555385	Intergenic	Intergenic	Intergenic	Other
chr1	14755090	14756220	8.23	8.44	7.99	0.45	0.0273	0.0838	FALSE	No_SigChange	8.31	8.43	8.17	0.27	0.267	0.368	FALSE	No_SigChange	7.75	7.98	7.48	0.5	0.0562	0.0867	FALSE	No_SigChange	8.03	8.43	7.48	0.95	0.000112	0.000308	TRUE	SigDecrease	exon	exon (NM_010827, exon 1 of 2)	311	NM_010827	Msc	0.076174	0.655752	exon	exon	exon	Other
chr1	14756800	14757320	6.42	6.41	6.43	-0.02	0.933	0.966	FALSE	No_SigChange	6.21	6.41	5.98	0.43	0.145	0.232	FALSE	No_SigChange	5.81	6.43	4.69	1.74	6.67e-08	7.12e-07	TRUE	SigDecrease	5.79	6.41	4.69	1.72	4.29e-07	1.98e-06	TRUE	SigDecrease	Intergenic	Intergenic	-1094	NM_010827	Msc	0.011561	0.5	Intergenic	Intergenic	Intergenic	Other
chr1	14918360	14919400	7.91	8.04	7.77	0.27	0.218	0.39	FALSE	No_SigChange	7.94	8.04	7.82	0.22	0.403	0.507	FALSE	No_SigChange	7.47	7.77	7.1	0.67	0.0154	0.029	FALSE	No_SigChange	7.64	8.04	7.1	0.94	0.000636	0.00146	TRUE	SigDecrease	promoter-TSS	promoter-TSS (NM_177781)	-18	NM_177781	Trpa1	0.026949	0.483654	promoter-TSS	promoter-TSS	promoter-TSS	Other
chr1	14934830	14935040	4.66	4.75	4.57	0.19	0.612	0.763	FALSE	No_SigChange	4.09	4.75	2.81	1.95	0.000155	0.00143	TRUE	SigDecrease	3.63	4.57	0	4.57	4.6e-08	5.14e-07	TRUE	SigDecrease	3.8	4.75	0	4.75	2.22e-08	1.36e-07	TRUE	SigDecrease	Intergenic	Intergenic	-16073	NM_177781	Trpa1	0.004785	0.414286	Intergenic	Intergenic	Intergenic	Other
chr1	15017690	15018180	6.58	6.52	6.64	-0.12	0.662	0.798	FALSE	No_SigChange	6.38	6.52	6.23	0.29	0.353	0.458	FALSE	No_SigChange	6.29	6.64	5.81	0.83	0.0027	0.00673	TRUE	SigDecrease	6.21	6.52	5.81	0.71	0.0139	0.023	FALSE	No_SigChange	Intergenic	RMER1A|Other|Other	-99073	NM_177781	Trpa1	0.010225	0.579592	RMER1A	Other	Other	Other
chr1	15286210	15287700	9.03	8.92	9.14	-0.22	0.279	0.462	FALSE	No_SigChange	8.93	8.92	8.93	-0.02	0.945	0.962	FALSE	No_SigChange	8.92	9.13	8.68	0.45	0.0713	0.106	FALSE	No_SigChange	8.8	8.92	8.68	0.24	0.32	0.377	FALSE	No_SigChange	Intergenic	CpG	-25497	NM_001098528	Kcnb2	0.066488	0.632215	CpG	CpG	CpG	Other
chr1	15327350	15327700	5.34	4.99	5.63	-0.64	0.0234	0.0746	FALSE	No_SigChange	5.18	4.99	5.36	-0.37	0.248	0.349	FALSE	No_SigChange	5.69	5.63	5.75	-0.12	0.652	0.704	FALSE	No_SigChange	5.42	4.99	5.75	-0.76	0.00963	0.0166	FALSE	No_SigChange	intron	B3A|SINE|B2	15073	NM_001098528	Kcnb2	0.011461	0.445714	B3A	B2	SINE	SINE
chr1	15621930	15622140	5.16	4.95	5.34	-0.39	0.202	0.37	FALSE	No_SigChange	5	4.95	5.05	-0.1	0.777	0.835	FALSE	No_SigChange	4.97	5.34	4.47	0.86	0.0178	0.0328	FALSE	No_SigChange	4.73	4.95	4.47	0.48	0.222	0.272	FALSE	No_SigChange	intron	intron (NM_001098528, intron 1 of 1)	-183623	NM_009352	Terf1	0	0.452381	intron	intron	intron	Other
chr1	15643830	15644780	7.9	7.09	8.42	-1.33	6.01e-08	1.76e-06	TRUE	SigIncrease	7	7.09	6.92	0.17	0.579	0.67	FALSE	No_SigChange	8.26	8.41	8.08	0.33	0.165	0.217	FALSE	No_SigChange	7.67	7.09	8.08	-1	0.000376	0.000913	TRUE	SigIncrease	intron	RMER17C-int|LTR|ERVK	-161353	NM_009352	Terf1	0.011591	0.448421	RMER17C-int	ERVK	LTR	LTR
chr1	15651910	15652600	6.18	5.26	6.74	-1.49	4.35e-06	6.79e-05	TRUE	SigIncrease	5.73	5.26	6.09	-0.83	0.021	0.0561	FALSE	No_SigChange	6.62	6.74	6.48	0.26	0.276	0.338	FALSE	No_SigChange	5.99	5.25	6.48	-1.22	0.000377	0.000916	TRUE	SigIncrease	intron	intron (NM_001098528, intron 1 of 1)	-153403	NM_009352	Terf1	0.017417	0.517391	intron	intron	intron	Other
chr1	15683800	15684190	5.39	5.42	5.37	0.05	0.864	0.926	FALSE	No_SigChange	5.3	5.42	5.18	0.24	0.488	0.588	FALSE	No_SigChange	5.38	5.36	5.4	-0.04	0.914	0.931	FALSE	No_SigChange	5.41	5.42	5.4	0.02	0.964	0.971	FALSE	No_SigChange	intron	intron (NM_001098528, intron 1 of 1)	-121663	NM_009352	Terf1	0.007712	0.417949	intron	intron	intron	Other
chr1	15719520	15719810	5.29	5.35	5.22	0.13	0.688	0.817	FALSE	No_SigChange	5.47	5.35	5.59	-0.24	0.543	0.638	FALSE	No_SigChange	5.05	5.22	4.86	0.36	0.248	0.308	FALSE	No_SigChange	5.12	5.35	4.86	0.49	0.168	0.213	FALSE	No_SigChange	Intergenic	Intergenic	-85993	NM_009352	Terf1	0.00346	0.455172	Intergenic	Intergenic	Intergenic	Other
chr1	15791100	15792150	8.95	8.97	8.93	0.04	0.82	0.901	FALSE	No_SigChange	8.63	8.97	8.18	0.8	0.00146	0.008	TRUE	SigDecrease	8.47	8.93	7.78	1.15	2.37e-06	1.62e-05	TRUE	SigDecrease	8.5	8.97	7.78	1.19	3.43e-07	1.61e-06	TRUE	SigDecrease	Intergenic	RMER17B|LTR|ERVK	-14033	NM_009352	Terf1	0.009533	0.446667	RMER17B	ERVK	LTR	LTR
chr1	15803160	15803350	4.08	3.88	4.25	-0.37	0.461	0.641	FALSE	No_SigChange	3.93	3.88	3.98	-0.1	0.844	0.887	FALSE	No_SigChange	4.5	4.25	4.71	-0.47	0.298	0.362	FALSE	No_SigChange	4.36	3.88	4.71	-0.83	0.0599	0.0846	FALSE	No_SigChange	Intergenic	RLTR11D|LTR|ERVK	-2403	NM_009352	Terf1	0	0.5	RLTR11D	ERVK	LTR	LTR
chr1	15803990	15804580	6.64	6.29	6.92	-0.62	0.00744	0.0306	FALSE	No_SigChange	5.95	6.29	5.51	0.79	0.00326	0.0146	FALSE	No_SigChange	6.36	6.92	5.45	1.47	1.06e-05	5.95e-05	TRUE	SigDecrease	5.93	6.29	5.45	0.84	0.0129	0.0216	FALSE	No_SigChange	Intergenic	RMER17A|LTR|ERVK	-1373	NM_009352	Terf1	0.020374	0.515254	RMER17A	ERVK	LTR	LTR
chr1	15804890	15806430	9.67	9.6	9.74	-0.14	0.47	0.649	FALSE	No_SigChange	9.42	9.6	9.21	0.39	0.117	0.197	FALSE	No_SigChange	9.52	9.74	9.26	0.47	0.0655	0.0987	FALSE	No_SigChange	9.44	9.6	9.26	0.34	0.168	0.212	FALSE	No_SigChange	promoter-TSS	promoter-TSS (NM_009352)	2	NM_009352	Terf1	0.052632	0.542857	promoter-TSS	promoter-TSS	promoter-TSS	Other
chr1	15814650	15814820	5.03	4.82	5.22	-0.4	0.261	0.442	FALSE	No_SigChange	4.51	4.82	4.11	0.71	0.102	0.178	FALSE	No_SigChange	4.56	5.22	3.32	1.9	9.42e-06	5.35e-05	TRUE	SigDecrease	4.26	4.82	3.32	1.5	0.000437	0.00105	TRUE	SigDecrease	intron	RLTR13F|LTR|ERVK	9077	NM_009352	Terf1	0.011834	0.441176	RLTR13F	ERVK	LTR	LTR
chr1	15883380	15883940	6.13	5.94	6.3	-0.36	0.196	0.363	FALSE	No_SigChange	5.58	5.94	5.11	0.83	0.0237	0.0614	FALSE	No_SigChange	5.9	6.3	5.34	0.96	0.00235	0.00599	TRUE	SigDecrease	5.67	5.94	5.34	0.6	0.0724	0.1	FALSE	No_SigChange	exon	exon (NM_001033288, exon 2 of 5)	9062	NM_001033288	Sbspon	0.033989	0.533929	exon	exon	exon	Other
chr1	15892300	15893310	8.45	8.31	8.58	-0.28	0.221	0.394	FALSE	No_SigChange	8.07	8.3	7.8	0.51	0.052	0.108	FALSE	No_SigChange	8.1	8.58	7.37	1.21	9.77e-06	5.52e-05	TRUE	SigDecrease	7.91	8.3	7.37	0.93	0.000334	0.000823	TRUE	SigDecrease	promoter-TSS	promoter-TSS (NM_001033288)	-83	NM_001033288	Sbspon	0.057483	0.606931	promoter-TSS	promoter-TSS	promoter-TSS	Other
chr1	15902450	15902830	5.85	5.46	6.15	-0.7	0.0147	0.0521	FALSE	No_SigChange	5.51	5.46	5.56	-0.1	0.763	0.824	FALSE	No_SigChange	5.98	6.15	5.79	0.37	0.178	0.232	FALSE	No_SigChange	5.63	5.46	5.79	-0.33	0.26	0.313	FALSE	No_SigChange	Intergenic	Intergenic	-9918	NM_001033288	Sbspon	0.021108	0.481579	Intergenic	Intergenic	Intergenic	Other
chr1	15993710	15993950	5.04	4.44	5.47	-1.02	0.0138	0.0496	FALSE	No_SigChange	4.39	4.44	4.34	0.1	0.825	0.872	FALSE	No_SigChange	5.18	5.47	4.82	0.65	0.0702	0.105	FALSE	No_SigChange	4.64	4.44	4.82	-0.38	0.365	0.423	FALSE	No_SigChange	Intergenic	Intergenic	99211	NM_001243238	4930444P10Rik	0.004184	0.479167	Intergenic	Intergenic	Intergenic	Other
chr1	15996270	15996570	5.27	5.31	5.23	0.08	0.813	0.897	FALSE	No_SigChange	5.27	5.31	5.22	0.09	0.84	0.884	FALSE	No_SigChange	5.18	5.23	5.14	0.09	0.774	0.812	FALSE	No_SigChange	5.23	5.31	5.14	0.17	0.641	0.689	FALSE	No_SigChange	Intergenic	Intergenic	96621	NM_001243238	4930444P10Rik	0.006689	0.48	Intergenic	Intergenic	Intergenic	Other
chr1	16006930	16007140	4.74	4.57	4.89	-0.32	0.365	0.553	FALSE	No_SigChange	4.61	4.57	4.64	-0.08	0.859	0.898	FALSE	No_SigChange	5.14	4.89	5.35	-0.46	0.124	0.17	FALSE	No_SigChange	5.01	4.57	5.35	-0.78	0.0238	0.0371	FALSE	No_SigChange	Intergenic	Intergenic	86006	NM_001243238	4930444P10Rik	0.009569	0.490476	Intergenic	Intergenic	Intergenic	Other
chr1	16061940	16062150	4.64	4.3	4.91	-0.6	0.152	0.302	FALSE	No_SigChange	4.81	4.3	5.19	-0.89	0.0333	0.0781	FALSE	No_SigChange	5	4.9	5.1	-0.19	0.56	0.619	FALSE	No_SigChange	4.75	4.3	5.1	-0.8	0.0556	0.0792	FALSE	No_SigChange	Intergenic	B3|SINE|B2	30996	NM_001243238	4930444P10Rik	0.014354	0.447619	B3	B2	SINE	SINE
chr1	16092800	16093970	8.1	8.06	8.13	-0.07	0.747	0.856	FALSE	No_SigChange	7.87	8.06	7.66	0.41	0.113	0.192	FALSE	No_SigChange	7.69	8.13	7.06	1.07	0.00034	0.00116	TRUE	SigDecrease	7.65	8.06	7.06	1	0.000575	0.00134	TRUE	SigDecrease	promoter-TSS	promoter-TSS (NM_001243238)	-344	NM_001243238	4930444P10Rik	0.051326	0.594017	promoter-TSS	promoter-TSS	promoter-TSS	Other
chr1	16097810	16098220	5.89	6.17	5.55	0.62	0.0118	0.0438	FALSE	No_SigChange	5.39	6.17	3.58	2.58	3.8e-09	2.49e-07	TRUE	SigDecrease	4.72	5.54	2.58	2.96	1.97e-11	5.43e-10	TRUE	SigDecrease	5.28	6.17	2.58	3.58	1.39e-16	5.22e-15	TRUE	SigDecrease	Intergenic	RSINE1|SINE|B4	-4974	NM_001243238	4930444P10Rik	0.00978	0.409756	RSINE1	B4	SINE	SINE
chr1	16098750	16100510	8.19	8.46	7.87	0.58	0.00453	0.0206	FALSE	No_SigChange	7.95	8.45	7.16	1.3	4.74e-07	1.32e-05	TRUE	SigDecrease	7.35	7.87	6.54	1.33	7.02e-07	5.57e-06	TRUE	SigDecrease	7.79	8.45	6.54	1.91	1.16e-13	2.29e-12	TRUE	SigDecrease	Intergenic	Intergenic	4803	NM_011291	Rpl7	0.008528	0.4125	Intergenic	Intergenic	Intergenic	Other
chr1	16103920	16106590	10.5	10.47	10.54	-0.07	0.699	0.824	FALSE	No_SigChange	10.28	10.47	10.07	0.4	0.09	0.161	FALSE	No_SigChange	10.26	10.53	9.92	0.62	0.00894	0.0184	FALSE	No_SigChange	10.22	10.47	9.92	0.55	0.0106	0.0182	FALSE	No_SigChange	promoter-TSS	promoter-TSS (NM_011291)	-627	NM_133832	Rdh10	0.084301	0.624719	promoter-TSS	promoter-TSS	promoter-TSS	Other
chr1	16115940	16116650	6.98	6.86	7.09	-0.23	0.286	0.47	FALSE	No_SigChange	6.71	6.86	6.55	0.32	0.243	0.343	FALSE	No_SigChange	6.78	7.09	6.38	0.71	0.0108	0.0215	FALSE	No_SigChange	6.64	6.86	6.38	0.48	0.0876	0.119	FALSE	No_SigChange	intron	intron (NM_133832, intron 2 of 5)	10413	NM_133832	Rdh10	0.016925	0.449296	intron	intron	intron	Other
chr1	16119700	16120030	5.44	4.64	5.95	-1.31	6.03e-05	0.000613	TRUE	SigIncrease	4.57	4.64	4.49	0.15	0.717	0.786	FALSE	No_SigChange	5.4	5.95	4.51	1.45	4.32e-05	0.000199	TRUE	SigDecrease	4.58	4.64	4.51	0.13	0.763	0.798	FALSE	No_SigChange	intron	intron (NM_133832, intron 2 of 5)	13983	NM_133832	Rdh10	0.006079	0.448485	intron	intron	intron	Other
chr1	16129750	16130830	8.7	8.68	8.72	-0.04	0.841	0.914	FALSE	No_SigChange	8.36	8.68	7.96	0.72	0.000901	0.00556	TRUE	SigDecrease	8.3	8.71	7.7	1.01	7.26e-06	4.27e-05	TRUE	SigDecrease	8.27	8.68	7.7	0.97	1.76e-06	7.17e-06	TRUE	SigDecrease	intron	ID4|SINE|ID	24408	NM_133832	Rdh10	0.008341	0.437037	ID4	ID	SINE	SINE
chr1	16228100	16228300	4.85	4.69	5	-0.31	0.339	0.527	FALSE	No_SigChange	4.65	4.68	4.61	0.07	0.847	0.889	FALSE	No_SigChange	4.4	5	3.36	1.64	0.000102	0.000414	TRUE	SigDecrease	4.17	4.68	3.36	1.33	0.00397	0.00752	TRUE	SigDecrease	TTS	TTS (NM_001111272)	122318	NM_133832	Rdh10	0.01005	0.555	TTS	TTS	TTS	Other
chr1	16268640	16269110	5.24	3.49	6.01	-2.52	9.46e-12	8.88e-10	TRUE	SigIncrease	4.22	3.49	4.7	-1.21	0.0079	0.0279	FALSE	No_SigChange	5.58	6.01	4.96	1.04	0.000831	0.00248	TRUE	SigDecrease	4.41	3.49	4.96	-1.48	0.00103	0.00225	TRUE	SigIncrease	intron	intron (NM_025303, intron 12 of 13)	162993	NM_133832	Rdh10	0.017058	0.504255	intron	intron	intron	Other
chr1	16294000	16294300	5.57	5.89	5.15	0.75	0.0163	0.0565	FALSE	No_SigChange	5.21	5.89	3.86	2.04	2.01e-06	4.33e-05	TRUE	SigDecrease	4.47	5.15	3.13	2.02	1.15e-05	6.36e-05	TRUE	SigDecrease	5.09	5.89	3.13	2.76	1.84e-10	1.78e-09	TRUE	SigDecrease	intron	intron (NM_025303, intron 12 of 13)	188268	NM_133832	Rdh10	0.016722	0.443333	intron	intron	intron	Other
chr1	16491340	16491510	3.85	3.17	4.3	-1.13	0.0172	0.059	FALSE	No_SigChange	3.67	3.17	4.04	-0.88	0.118	0.198	FALSE	No_SigChange	4.51	4.3	4.7	-0.4	0.294	0.358	FALSE	No_SigChange	4.13	3.17	4.7	-1.53	0.00065	0.00149	TRUE	SigIncrease	intron	B3|SINE|B2	27877	NM_025303	Stau2	0.011834	0.470588	B3	B2	SINE	SINE
chr1	16518590	16520170	9.72	9.61	9.83	-0.22	0.28	0.463	FALSE	No_SigChange	9.46	9.61	9.29	0.31	0.176	0.268	FALSE	No_SigChange	9.55	9.83	9.19	0.64	0.0155	0.0291	FALSE	No_SigChange	9.42	9.61	9.19	0.41	0.0875	0.119	FALSE	No_SigChange	promoter-TSS	promoter-TSS (NM_001111272)	-78	NM_001111272	Stau2	0.09563	0.681646	promoter-TSS	promoter-TSS	promoter-TSS	Other
chr1	16537780	16537990	4.61	3.61	5.2	-1.58	0.000163	0.00139	TRUE	SigIncrease	3.67	3.61	3.73	-0.11	0.832	0.877	FALSE	No_SigChange	4.56	5.2	3.39	1.81	1.25e-05	6.85e-05	TRUE	SigDecrease	3.51	3.61	3.39	0.22	0.695	0.737	FALSE	No_SigChange	Intergenic	ORR1D1|LTR|ERVL-MaLR	-18583	NM_001111272	Stau2	0.004785	0.438095	ORR1D1	ERVL-MaLR	LTR	LTR
chr1	16554020	16554290	3.63	3.49	3.75	-0.26	0.626	0.773	FALSE	No_SigChange	3.82	3.49	4.09	-0.6	0.259	0.36	FALSE	No_SigChange	4.73	3.75	5.31	-1.56	2.6e-05	0.000128	TRUE	SigIncrease	4.67	3.49	5.31	-1.82	1.66e-05	5.47e-05	TRUE	SigIncrease	intron	B3|SINE|B2	-34853	NM_001111272	Stau2	0.007435	0.444444	B3	B2	SINE	SINE
chr1	16577880	16578110	4.97	4.63	5.24	-0.61	0.0614	0.155	FALSE	No_SigChange	4.48	4.63	4.32	0.31	0.445	0.548	FALSE	No_SigChange	4.79	5.24	4.15	1.09	0.000973	0.00283	TRUE	SigDecrease	4.41	4.63	4.15	0.48	0.234	0.285	FALSE	No_SigChange	intron	intron (NR_073122, intron 4 of 4)	41343	NM_001271016	Ube2w	0.017467	0.46087	intron	intron	intron	Other
chr1	16600640	16600820	4	2.95	4.6	-1.65	0.00043	0.00309	TRUE	SigIncrease	2.7	2.95	2.39	0.56	0.411	0.516	FALSE	No_SigChange	4.66	4.6	4.71	-0.12	0.759	0.799	FALSE	No_SigChange	4.09	2.95	4.71	-1.76	0.000211	0.000544	TRUE	SigIncrease	intron	intron (NM_025773, intron 2 of 5)	18608	NM_001271016	Ube2w	0.039106	0.405556	intron	intron	intron	Other
chr1	16618360	16619830	9.68	9.67	9.69	-0.02	0.916	0.956	FALSE	No_SigChange	9.51	9.67	9.34	0.34	0.188	0.282	FALSE	No_SigChange	9.44	9.69	9.15	0.55	0.0184	0.0337	FALSE	No_SigChange	9.43	9.67	9.15	0.53	0.0168	0.0273	FALSE	No_SigChange	intron	CpG	243	NM_001271016	Ube2w	0.087134	0.630612	CpG	CpG	CpG	Other
chr1	16656410	16657730	10.06	10.13	9.97	0.16	0.387	0.573	FALSE	No_SigChange	9.93	10.13	9.69	0.44	0.0588	0.118	FALSE	No_SigChange	9.76	9.97	9.52	0.45	0.0756	0.111	FALSE	No_SigChange	9.86	10.13	9.52	0.62	0.00671	0.012	FALSE	No_SigChange	promoter-TSS	promoter-TSS (NR_037998)	-205	NM_026456	Tceb1	0.043973	0.528788	promoter-TSS	promoter-TSS	promoter-TSS	Other
chr1	16664890	16665800	8.64	8.62	8.67	-0.05	0.824	0.904	FALSE	No_SigChange	8.44	8.62	8.24	0.38	0.139	0.224	FALSE	No_SigChange	8.45	8.66	8.21	0.46	0.0562	0.0866	FALSE	No_SigChange	8.43	8.62	8.21	0.41	0.0882	0.12	FALSE	No_SigChange	exon	exon (NM_027415, exon 1 of 3)	154	NM_026392	Tmem70	0.072607	0.582418	exon	exon	exon	Other
chr1	16688220	16688970	7.33	7.39	7.26	0.13	0.582	0.74	FALSE	No_SigChange	7.29	7.39	7.18	0.21	0.433	0.536	FALSE	No_SigChange	7.02	7.26	6.74	0.52	0.0645	0.0974	FALSE	No_SigChange	7.1	7.39	6.74	0.65	0.00996	0.0171	FALSE	No_SigChange	exon	exon (NM_016923, exon 1 of 5)	139	NM_001159711	Ly96	0.029372	0.48	exon	exon	exon	Other
chr1	16780740	16781300	5.43	4.98	5.77	-0.79	0.0043	0.0198	FALSE	No_SigChange	5.12	4.98	5.25	-0.27	0.435	0.539	FALSE	No_SigChange	5.77	5.77	5.77	0	0.996	0.998	FALSE	No_SigChange	5.42	4.97	5.77	-0.79	0.0159	0.0259	FALSE	No_SigChange	Intergenic	RMER17A2|LTR|ERVK	92564	NM_001159711	Ly96	0.0161	0.5375	RMER17A2	ERVK	LTR	LTR
chr1	16798410	16798730	5.88	5.75	6	-0.25	0.288	0.471	FALSE	No_SigChange	5.7	5.75	5.64	0.11	0.69	0.764	FALSE	No_SigChange	5.67	6	5.24	0.76	0.00292	0.00718	TRUE	SigDecrease	5.52	5.75	5.24	0.52	0.0596	0.0842	FALSE	No_SigChange	Intergenic	Intergenic	110114	NM_001159711	Ly96	0.003135	0.471875	Intergenic	Intergenic	Intergenic	Other
chr1	16824070	16824510	6.67	6.64	6.7	-0.06	0.787	0.881	FALSE	No_SigChange	6.17	6.63	5.49	1.14	3.44e-05	0.000432	TRUE	SigDecrease	6.35	6.7	5.88	0.82	0.00174	0.00465	TRUE	SigDecrease	6.31	6.63	5.88	0.75	0.00749	0.0133	FALSE	No_SigChange	Intergenic	LTR48|LTR|ERV1	135834	NM_001159711	Ly96	0.01139	0.456818	LTR48	ERV1	LTR	LTR
chr1	16824830	16825360	7.03	7.19	6.86	0.33	0.199	0.366	FALSE	No_SigChange	6.72	7.19	6.02	1.16	1.6e-06	3.59e-05	TRUE	SigDecrease	6.36	6.86	5.6	1.26	4.24e-05	0.000195	TRUE	SigDecrease	6.6	7.18	5.6	1.59	3.38e-10	3.08e-09	TRUE	SigDecrease	Intergenic	RLTR13G|LTR|ERVK	136639	NM_001159711	Ly96	0.018904	0.441509	RLTR13G	ERVK	LTR	LTR
chr1	17009590	17010370	6.78	7.04	6.46	0.59	0.0155	0.0544	FALSE	No_SigChange	6.41	7.04	5.24	1.8	5.17e-07	1.42e-05	TRUE	SigDecrease	5.69	6.45	3.95	2.5	1.16e-13	5.89e-12	TRUE	SigDecrease	6.2	7.04	3.95	3.09	3.25e-26	9.21e-24	TRUE	SigDecrease	intron	intron (NM_020604, intron 3 of 4)	87909	NM_020604	Jph1	0.001284	0.444872	intron	intron	intron	Other
chr1	17091620	17092030	6.11	5.79	6.37	-0.58	0.0284	0.0862	FALSE	No_SigChange	5.51	5.79	5.16	0.63	0.077	0.144	FALSE	No_SigChange	5.86	6.37	5.05	1.31	1.08e-06	8.12e-06	TRUE	SigDecrease	5.47	5.79	5.05	0.74	0.0163	0.0266	FALSE	No_SigChange	exon	exon (NM_020604, exon 2 of 5)	6064	NM_020604	Jph1	0.06846	0.602439	exon	exon	exon	Other
chr1	17096710	17098300	9.57	9.54	9.6	-0.07	0.73	0.844	FALSE	No_SigChange	9.34	9.53	9.13	0.41	0.0961	0.17	FALSE	No_SigChange	9.21	9.6	8.68	0.92	0.000362	0.00123	TRUE	SigDecrease	9.17	9.53	8.68	0.85	0.00049	0.00116	TRUE	SigDecrease	exon	exon (NM_020604, exon 1 of 5)	384	NM_020604	Jph1	0.087476	0.674843	exon	exon	exon	Other
chr1	17123070	17123830	6.83	6.8	6.86	-0.06	0.791	0.884	FALSE	No_SigChange	6.73	6.8	6.65	0.15	0.55	0.645	FALSE	No_SigChange	6.76	6.86	6.66	0.19	0.383	0.448	FALSE	No_SigChange	6.73	6.8	6.66	0.14	0.565	0.618	FALSE	No_SigChange	Intergenic	Intergenic	-21923	NM_010267	Gdap1	0.025033	0.481579	Intergenic	Intergenic	Intergenic	Other
chr1	17145300	17145890	8.04	8.08	8	0.08	0.692	0.819	FALSE	No_SigChange	7.78	8.08	7.42	0.66	0.00607	0.023	FALSE	No_SigChange	7.51	7.99	6.79	1.2	1.02e-06	7.71e-06	TRUE	SigDecrease	7.57	8.07	6.79	1.28	8.02e-09	5.39e-08	TRUE	SigDecrease	intron	CpG	222	NM_010267	Gdap1	0.044143	0.576271	CpG	CpG	CpG	Other
chr1	17163680	17163900	5.25	5.3	5.2	0.1	0.757	0.862	FALSE	No_SigChange	5.19	5.3	5.08	0.23	0.524	0.621	FALSE	No_SigChange	5.17	5.2	5.14	0.06	0.866	0.891	FALSE	No_SigChange	5.22	5.3	5.14	0.16	0.629	0.677	FALSE	No_SigChange	3'UTR	3' UTR (NM_010267, exon 6 of 6)	18417	NM_010267	Gdap1	0.018265	0.377273	3'UTR	3'UTR	3'UTR	Other
chr1	17207360	17208220	8.04	8.05	8.02	0.02	0.888	0.941	FALSE	No_SigChange	7.68	8.05	7.18	0.87	0.0031	0.0141	FALSE	No_SigChange	7.68	8.02	7.23	0.8	0.000294	0.00103	TRUE	SigDecrease	7.69	8.05	7.23	0.82	0.000157	0.000416	TRUE	SigDecrease	Intergenic	RLTR9F|LTR|ERVK	62417	NM_010267	Gdap1	0.009313	0.526744	RLTR9F	ERVK	LTR	LTR
chr1	17250480	17251360	7.68	7.49	7.85	-0.36	0.136	0.279	FALSE	No_SigChange	7.3	7.48	7.09	0.4	0.181	0.274	FALSE	No_SigChange	7.6	7.84	7.3	0.55	0.044	0.0704	FALSE	No_SigChange	7.39	7.48	7.3	0.19	0.511	0.567	FALSE	No_SigChange	Intergenic	RLTR9E|LTR|ERVK	105547	NM_010267	Gdap1	0.009101	0.456818	RLTR9E	ERVK	LTR	LTR
chr1	17489630	17490220	5.89	5.51	6.19	-0.69	0.0157	0.0547	FALSE	No_SigChange	5.27	5.51	4.98	0.53	0.129	0.211	FALSE	No_SigChange	5.91	6.19	5.55	0.65	0.0315	0.0531	FALSE	No_SigChange	5.53	5.51	5.55	-0.04	0.91	0.925	FALSE	No_SigChange	Intergenic	RLTR13G|LTR|ERVK	-111976	NM_053191	Pi15	0.010187	0.423729	RLTR13G	ERVK	LTR	LTR
chr1	17506650	17507240	7.38	7.66	7.05	0.61	0.01	0.0386	FALSE	No_SigChange	7.46	7.66	7.23	0.43	0.087	0.157	FALSE	No_SigChange	6.86	7.04	6.64	0.4	0.128	0.175	FALSE	No_SigChange	7.24	7.66	6.64	1.01	1.15e-05	3.92e-05	TRUE	SigDecrease	Intergenic	Intergenic	-94956	NM_053191	Pi15	0.001698	0.464407	Intergenic	Intergenic	Intergenic	Other
chr1	17727100	17727920	8.19	8.21	8.17	0.04	0.849	0.918	FALSE	No_SigChange	8.08	8.21	7.94	0.27	0.244	0.344	FALSE	No_SigChange	7.77	8.17	7.23	0.94	0.000457	0.0015	TRUE	SigDecrease	7.8	8.21	7.23	0.98	0.000141	0.000377	TRUE	SigDecrease	promoter-TSS	promoter-TSS (NM_031402)	93	NM_031402	Crispld1	0.02442	0.57439	promoter-TSS	promoter-TSS	promoter-TSS	Other
chr1	17846460	17846640	5.01	4.95	5.05	-0.1	0.748	0.856	FALSE	No_SigChange	4.74	4.95	4.49	0.46	0.185	0.279	FALSE	No_SigChange	4.85	5.05	4.61	0.44	0.208	0.265	FALSE	No_SigChange	4.79	4.95	4.61	0.34	0.328	0.385	FALSE	No_SigChange	Intergenic	RLTR9B2|LTR|ERVK	119133	NM_031402	Crispld1	0	0.516667	RLTR9B2	ERVK	LTR	LTR
chr1	17931680	17932190	6.73	6.93	6.51	0.42	0.0844	0.197	FALSE	No_SigChange	6.39	6.93	5.54	1.39	3.64e-06	6.99e-05	TRUE	SigDecrease	6.13	6.51	5.61	0.89	0.000864	0.00257	TRUE	SigDecrease	6.41	6.93	5.61	1.31	1.26e-06	5.3e-06	TRUE	SigDecrease	Intergenic	RLTR13D6|LTR|ERVK	204518	NM_031402	Crispld1	0.003929	0.447059	RLTR13D6	ERVK	LTR	LTR
chr1	18016130	18016510	3.95	1	4.86	-3.86	2.57e-09	1.18e-07	TRUE	SigIncrease	1.7	1	2.17	-1.17	0.268	0.369	FALSE	No_SigChange	5.12	4.86	5.35	-0.49	0.116	0.161	FALSE	No_SigChange	4.42	1	5.35	-4.35	2.07e-12	3.07e-11	TRUE	SigIncrease	Intergenic	Intergenic	120731	NM_030033	Crisp4	0.031662	0.381579	Intergenic	Intergenic	Intergenic	Other
chr1	18030160	18030640	6.01	6.45	5.38	1.07	0.000168	0.00142	TRUE	SigDecrease	6.06	6.45	5.54	0.91	0.00207	0.0104	FALSE	No_SigChange	4.93	5.38	4.28	1.1	0.00312	0.00759	TRUE	SigDecrease	5.74	6.45	4.28	2.16	6.06e-13	1.02e-11	TRUE	SigDecrease	Intergenic	RLTR9A3A|LTR|ERVK	106651	NM_030033	Crisp4	0.010438	0.4625	RLTR9A3A	ERVK	LTR	LTR
chr1	18057070	18059130	9.17	9.17	9.18	-0.01	0.967	0.984	FALSE	No_SigChange	9.08	9.17	8.99	0.17	0.454	0.557	FALSE	No_SigChange	8.92	9.17	8.6	0.57	0.0521	0.0813	FALSE	No_SigChange	8.91	9.17	8.6	0.56	0.0418	0.0614	FALSE	No_SigChange	Intergenic	CpG	78951	NM_030033	Crisp4	0.058766	0.558738	CpG	CpG	CpG	Other
chr1	18077920	18078840	5.2	6.06	2.75	3.31	1.71e-15	4.79e-13	TRUE	SigDecrease	5.99	6.06	5.92	0.13	0.672	0.749	FALSE	No_SigChange	3.77	2.75	4.36	-1.6	0.00322	0.00781	TRUE	SigIncrease	5.45	6.06	4.36	1.7	4.44e-07	2.04e-06	TRUE	SigDecrease	Intergenic	L1Md_Gf|LINE|L1	58671	NM_030033	Crisp4	0.047878	0.61413	L1Md_Gf	L1	LINE	LINE
chr1	18223420	18223980	7.14	7.3	6.97	0.33	0.115	0.247	FALSE	No_SigChange	7.13	7.3	6.93	0.36	0.138	0.223	FALSE	No_SigChange	7.06	6.97	7.14	-0.17	0.483	0.546	FALSE	No_SigChange	7.22	7.3	7.14	0.16	0.487	0.544	FALSE	No_SigChange	promoter-TSS	promoter-TSS (NR_002879)	-136	NR_002879	Defb44-ps	0.007156	0.382143	promoter-TSS	promoter-TSS	promoter-TSS	Other
chr1	18246000	18246260	5.3	5.2	5.4	-0.2	0.564	0.726	FALSE	No_SigChange	5.04	5.2	4.86	0.34	0.388	0.493	FALSE	No_SigChange	5.47	5.4	5.55	-0.15	0.644	0.697	FALSE	No_SigChange	5.38	5.2	5.55	-0.35	0.297	0.352	FALSE	No_SigChange	Intergenic	RLTR13D6|LTR|ERVK	-8687	NM_001039123	Defb18	0.015444	0.446154	RLTR13D6	ERVK	LTR	LTR
chr1	18268520	18269710	7.53	7.5	7.55	-0.05	0.82	0.901	FALSE	No_SigChange	7.02	7.5	6.28	1.22	4.95e-06	9.01e-05	TRUE	SigDecrease	6.9	7.55	5.68	1.87	9.6e-12	2.9e-10	TRUE	SigDecrease	6.86	7.5	5.68	1.82	3.6e-10	3.26e-09	TRUE	SigDecrease	Intergenic	RLTR13D6|LTR|ERVK	-3977	NM_183124	Defb41	0.009251	0.4	RLTR13D6	ERVK	LTR	LTR
chr1	18289030	18289200	4.5	3.83	4.95	-1.12	0.0043	0.0198	FALSE	No_SigChange	4.33	3.83	4.7	-0.87	0.0473	0.101	FALSE	No_SigChange	4.8	4.95	4.63	0.32	0.33	0.395	FALSE	No_SigChange	4.28	3.83	4.63	-0.8	0.0636	0.0893	FALSE	No_SigChange	Intergenic	Intergenic	-23977	NM_183124	Defb41	0.011834	0.4	Intergenic	Intergenic	Intergenic	Other
chr1	18323370	18323740	5.57	5.69	5.44	0.25	0.463	0.643	FALSE	No_SigChange	5.84	5.69	5.98	-0.29	0.347	0.451	FALSE	No_SigChange	5.16	5.44	4.82	0.62	0.0727	0.108	FALSE	No_SigChange	5.32	5.69	4.82	0.87	0.0114	0.0194	FALSE	No_SigChange	Intergenic	RMER17B|LTR|ERVK	-58417	NM_183124	Defb41	0.02168	0.586486	RMER17B	ERVK	LTR	LTR
chr1	18324310	18324960	5.81	5.39	6.13	-0.74	0.0115	0.0429	FALSE	No_SigChange	6.16	5.39	6.67	-1.27	5.49e-06	9.8e-05	TRUE	SigIncrease	6.21	6.13	6.28	-0.14	0.674	0.724	FALSE	No_SigChange	5.9	5.39	6.28	-0.89	0.00672	0.012	FALSE	No_SigChange	Intergenic	Intergenic	-59497	NM_183124	Defb41	0.013867	0.463077	Intergenic	Intergenic	Intergenic	Other
chr1	18412780	18413100	5.2	5.55	4.74	0.81	0.00561	0.0245	FALSE	No_SigChange	5.43	5.55	5.29	0.25	0.385	0.49	FALSE	No_SigChange	4.95	4.74	5.13	-0.39	0.212	0.27	FALSE	No_SigChange	5.35	5.54	5.13	0.42	0.144	0.186	FALSE	No_SigChange	Intergenic	Intergenic	-147802	NM_183124	Defb41	0.00627	0.428125	Intergenic	Intergenic	Intergenic	Other
chr1	18536790	18536990	2.52	3	1.81	1.19	0.153	0.304	FALSE	No_SigChange	4	3	4.58	-1.59	0.00174	0.00914	TRUE	SigIncrease	3.09	1.8	3.75	-1.95	0.0174	0.0322	FALSE	No_SigChange	3.42	3	3.75	-0.76	0.282	0.337	FALSE	No_SigChange	Intergenic	Intergenic	-271752	NM_183124	Defb41	0	0.295	Intergenic	Intergenic	Intergenic	Other
chr1	18639440	18639960	6.29	6.31	6.27	0.05	0.851	0.92	FALSE	No_SigChange	5.81	6.31	5.02	1.29	3.78e-05	0.000464	TRUE	SigDecrease	5.9	6.26	5.42	0.85	0.00398	0.0093	TRUE	SigDecrease	5.93	6.31	5.42	0.89	0.00229	0.0046	TRUE	SigDecrease	Intergenic	Intergenic	-374562	NM_183124	Defb41	0.011561	0.436538	Intergenic	Intergenic	Intergenic	Other
chr1	18793670	18793890	5.89	6.02	5.74	0.28	0.315	0.501	FALSE	No_SigChange	5.67	6.02	5.23	0.79	0.0177	0.0497	FALSE	No_SigChange	5.43	5.74	5.03	0.71	0.0304	0.0514	FALSE	No_SigChange	5.61	6.01	5.03	0.98	0.00168	0.00349	TRUE	SigDecrease	Intergenic	Intergenic	-309242	NM_153154	Tfap2d	0.004566	0.495455	Intergenic	Intergenic	Intergenic	Other
chr1	18831090	18831500	6.34	6.53	6.1	0.43	0.132	0.274	FALSE	No_SigChange	5.88	6.53	4.67	1.86	1.32e-09	1.04e-07	TRUE	SigDecrease	5.41	6.1	4.02	2.08	3.28e-07	2.86e-06	TRUE	SigDecrease	5.77	6.53	4.02	2.51	9.58e-12	1.23e-10	TRUE	SigDecrease	Intergenic	Intergenic	-271727	NM_153154	Tfap2d	0.002445	0.434146	Intergenic	Intergenic	Intergenic	Other
chr1	19088310	19088480	4.94	5.04	4.83	0.21	0.564	0.726	FALSE	No_SigChange	4.68	5.04	4.19	0.85	0.0447	0.0966	FALSE	No_SigChange	4.42	4.83	3.86	0.97	0.0106	0.0211	FALSE	No_SigChange	4.57	5.04	3.86	1.19	0.00523	0.00964	TRUE	SigDecrease	Intergenic	Intergenic	-14627	NM_153154	Tfap2d	0.011834	0.552941	Intergenic	Intergenic	Intergenic	Other
chr1	19096930	19097290	5.56	5.85	5.2	0.65	0.0208	0.0682	FALSE	No_SigChange	5.84	5.85	5.83	0.02	0.932	0.953	FALSE	No_SigChange	5.26	5.2	5.31	-0.11	0.736	0.779	FALSE	No_SigChange	5.61	5.85	5.31	0.54	0.0946	0.127	FALSE	No_SigChange	Intergenic	Intergenic	-5912	NM_153154	Tfap2d	0.047354	0.519444	Intergenic	Intergenic	Intergenic	Other
chr1	19103910	19105910	8.92	9.25	8.48	0.77	0.000696	0.00459	TRUE	SigDecrease	8.93	9.25	8.51	0.74	0.00703	0.0256	FALSE	No_SigChange	8.12	8.48	7.64	0.84	0.000665	0.00206	TRUE	SigDecrease	8.66	9.25	7.64	1.61	2.22e-09	1.69e-08	TRUE	SigDecrease	intron	CpG	1888	NM_153154	Tfap2d	0.031516	0.518	CpG	CpG	CpG	Other
chr1	19109810	19110080	6.33	6.56	6.05	0.51	0.0374	0.107	FALSE	No_SigChange	6.21	6.56	5.73	0.83	0.00424	0.0178	FALSE	No_SigChange	5.75	6.05	5.38	0.66	0.0257	0.0445	FALSE	No_SigChange	6.09	6.56	5.38	1.18	8.68e-05	0.000244	TRUE	SigDecrease	intron	intron (NM_153154, intron 3 of 7)	6923	NM_153154	Tfap2d	0.048327	0.514815	intron	intron	intron	Other
chr1	19179030	19179410	6.13	6.01	6.25	-0.25	0.376	0.563	FALSE	No_SigChange	5.92	6	5.83	0.17	0.607	0.694	FALSE	No_SigChange	6	6.25	5.69	0.56	0.039	0.0635	FALSE	No_SigChange	5.85	6	5.69	0.32	0.307	0.363	FALSE	No_SigChange	Intergenic	Intergenic	-29694	NM_009334	Tfap2b	0.007916	0.378947	Intergenic	Intergenic	Intergenic	Other
chr1	19205730	19206200	5.45	5.07	5.75	-0.69	0.0131	0.0476	FALSE	No_SigChange	5.38	5.06	5.64	-0.57	0.0609	0.121	FALSE	No_SigChange	5.43	5.75	5.02	0.73	0.0115	0.0227	FALSE	No_SigChange	5.04	5.06	5.02	0.04	0.895	0.912	FALSE	No_SigChange	Intergenic	Intergenic	-2949	NM_009334	Tfap2b	0.025586	0.391489	Intergenic	Intergenic	Intergenic	Other
chr1	19208990	19213370	9.84	10.09	9.54	0.55	0.0114	0.0427	FALSE	No_SigChange	9.7	10.09	9.15	0.94	0.000968	0.00586	TRUE	SigDecrease	9	9.54	8.13	1.41	5.69e-08	6.2e-07	TRUE	SigDecrease	9.42	10.09	8.13	1.96	4.57e-13	7.89e-12	TRUE	SigDecrease	promoter-TSS	promoter-TSS (NM_001025305)	-874	NM_001025305	Tfap2b	0.028317	0.485388	promoter-TSS	promoter-TSS	promoter-TSS	Other
chr1	19213960	19214720	7.09	7.29	6.86	0.43	0.0424	0.117	FALSE	No_SigChange	7.09	7.29	6.85	0.44	0.113	0.192	FALSE	No_SigChange	6.38	6.86	5.67	1.19	2.82e-05	0.000138	TRUE	SigDecrease	6.7	7.29	5.67	1.62	6.01e-08	3.33e-07	TRUE	SigDecrease	exon	exon (NM_001286340, exon 2 of 8)	2286	NM_001025305	Tfap2b	0.054018	0.575	exon	exon	exon	Other
chr1	19218130	19218630	6.31	6.11	6.48	-0.36	0.214	0.385	FALSE	No_SigChange	5.66	6.11	4.99	1.12	0.00171	0.00903	TRUE	SigDecrease	5.71	6.47	4	2.47	0.000894	0.00264	TRUE	SigDecrease	5.41	6.11	4	2.11	0.0109	0.0186	FALSE	No_SigChange	intron	intron (NM_001025305, intron 2 of 6)	6326	NM_001025305	Tfap2b	0.014028	0.488	intron	intron	intron	Other
chr1	19226100	19227050	7.13	6.64	7.5	-0.86	0.000156	0.00134	TRUE	SigIncrease	6.41	6.64	6.13	0.51	0.0362	0.0831	FALSE	No_SigChange	7.02	7.5	6.31	1.19	2.83e-05	0.000138	TRUE	SigDecrease	6.48	6.64	6.31	0.33	0.221	0.271	FALSE	No_SigChange	exon	exon (NM_001286340, exon 4 of 8)	14521	NM_001025305	Tfap2b	0.022129	0.501053	exon	exon	exon	Other
chr1	19230880	19231530	6.12	5.58	6.5	-0.92	0.00022	0.00178	TRUE	SigIncrease	5.48	5.58	5.37	0.21	0.49	0.59	FALSE	No_SigChange	5.77	6.5	4.21	2.29	2.76e-14	1.67e-12	TRUE	SigDecrease	5.05	5.58	4.21	1.37	0.00014	0.000376	TRUE	SigDecrease	intron	intron (NM_001025305, intron 6 of 6)	19151	NM_001025305	Tfap2b	0.021572	0.496923	intron	intron	intron	Other
chr1	19232560	19233060	6.16	6.42	5.85	0.57	0.067	0.166	FALSE	No_SigChange	6.16	6.42	5.86	0.56	0.111	0.189	FALSE	No_SigChange	5.45	5.84	4.91	0.94	0.00707	0.0151	FALSE	No_SigChange	5.85	6.42	4.91	1.51	6.93e-06	2.48e-05	TRUE	SigDecrease	intron	intron (NM_001025305, intron 6 of 6)	20756	NM_001025305	Tfap2b	0.002004	0.482	intron	intron	intron	Other
chr1	19233630	19234250	7.69	7.82	7.55	0.26	0.272	0.454	FALSE	No_SigChange	7.58	7.81	7.31	0.5	0.0792	0.147	FALSE	No_SigChange	7.23	7.55	6.82	0.73	0.00327	0.0079	TRUE	SigDecrease	7.4	7.81	6.82	0.99	0.000211	0.000544	TRUE	SigDecrease	intron	intron (NM_001025305, intron 6 of 6)	21886	NM_001025305	Tfap2b	0.033926	0.522581	intron	intron	intron	Other
chr1	19234840	19235650	8.05	8.13	7.96	0.17	0.465	0.645	FALSE	No_SigChange	7.86	8.13	7.54	0.59	0.0381	0.0861	FALSE	No_SigChange	7.41	7.96	6.5	1.46	1.08e-07	1.08e-06	TRUE	SigDecrease	7.53	8.13	6.5	1.62	2.78e-09	2.06e-08	TRUE	SigDecrease	3'UTR	3' UTR (NM_009334, exon 7 of 7)	23191	NM_001025305	Tfap2b	0.027194	0.485185	3'UTR	3'UTR	3'UTR	Other
chr1	19236320	19237490	8.17	8.36	7.94	0.42	0.056	0.145	FALSE	No_SigChange	8.17	8.36	7.94	0.42	0.121	0.201	FALSE	No_SigChange	7.52	7.94	6.92	1.02	8.88e-06	5.08e-05	TRUE	SigDecrease	7.81	8.36	6.92	1.44	4.15e-09	2.97e-08	TRUE	SigDecrease	3'UTR	3' UTR (NM_001286340, exon 8 of 8)	24851	NM_001025305	Tfap2b	0.02994	0.495726	3'UTR	3'UTR	3'UTR	Other
chr1	19240250	19241880	8.25	8.43	8.06	0.37	0.109	0.237	FALSE	No_SigChange	8.14	8.43	7.77	0.65	0.0134	0.0407	FALSE	No_SigChange	7.63	8.05	7.03	1.03	3.81e-05	0.000178	TRUE	SigDecrease	7.89	8.43	7.03	1.4	2.17e-07	1.07e-06	TRUE	SigDecrease	Intergenic	Intergenic	29011	NM_001025305	Tfap2b	0.024555	0.487117	Intergenic	Intergenic	Intergenic	Other
chr1	19289950	19290490	5.54	5.11	5.87	-0.76	0.0126	0.0462	FALSE	No_SigChange	5.67	5.11	6.07	-0.96	0.00207	0.0104	FALSE	No_SigChange	6.07	5.87	6.24	-0.37	0.184	0.238	FALSE	No_SigChange	5.78	5.11	6.24	-1.14	0.00037	0.000901	TRUE	SigIncrease	Intergenic	Lx2|LINE|L1	78166	NM_001025305	Tfap2b	0.009276	0.462963	Lx2	L1	LINE	LINE
chr1	19344570	19345340	6.86	6.61	7.07	-0.46	0.0388	0.11	FALSE	No_SigChange	6.47	6.61	6.31	0.31	0.279	0.382	FALSE	No_SigChange	6.98	7.07	6.88	0.2	0.457	0.521	FALSE	No_SigChange	6.75	6.61	6.88	-0.26	0.306	0.362	FALSE	No_SigChange	Intergenic	Intergenic	132901	NM_001025305	Tfap2b	0.015605	0.462338	Intergenic	Intergenic	Intergenic	Other
chr1	19774610	19774780	4.43	5.12	3.09	2.03	5.55e-05	0.000572	TRUE	SigDecrease	4.5	5.12	3.39	1.73	0.108	0.186	FALSE	No_SigChange	2.61	3.09	1.91	1.18	0.116	0.161	FALSE	No_SigChange	4.26	5.12	1.91	3.21	1.84e-07	9.19e-07	TRUE	SigDecrease	Intergenic	Intergenic	562641	NM_001025305	Tfap2b	0	0.394118	Intergenic	Intergenic	Intergenic	Other
chr1	19999690	19999980	3.79	4.74	0	4.74	3.26e-08	1.05e-06	TRUE	SigDecrease	4.94	4.74	5.11	-0.37	0.377	0.482	FALSE	No_SigChange	3.32	0	4.25	-4.25	6.94e-07	5.52e-06	TRUE	SigIncrease	4.51	4.74	4.25	0.49	0.239	0.291	FALSE	No_SigChange	Intergenic	RMER6C|LTR|ERVK	-356619	NR_045734	4930486I03Rik	0.00346	0.42069	RMER6C	ERVK	LTR	LTR
chr1	20311090	20311920	5.79	6.04	5.48	0.57	0.1	0.223	FALSE	No_SigChange	6.38	6.04	6.65	-0.6	0.037	0.0842	FALSE	No_SigChange	6.14	5.47	6.59	-1.11	0.00112	0.0032	TRUE	SigIncrease	6.34	6.04	6.59	-0.55	0.0776	0.107	FALSE	No_SigChange	intron	intron (NM_153179, intron 49 of 66)	-44949	NR_045734	4930486I03Rik	0.008444	0.390361	intron	intron	intron	Other
chr1	20431880	20433010	5.63	6.17	4.73	1.45	1.34e-06	2.51e-05	TRUE	SigDecrease	6.28	6.17	6.39	-0.21	0.444	0.548	FALSE	No_SigChange	5.82	4.73	6.43	-1.71	1.05e-07	1.06e-06	TRUE	SigIncrease	6.31	6.17	6.43	-0.26	0.297	0.353	FALSE	No_SigChange	intron	L1Md_T|LINE|L1	75991	NR_045734	4930486I03Rik	0.049601	0.584956	L1Md_T	L1	LINE	LINE
chr1	20450210	20450500	5.78	5.67	5.89	-0.23	0.438	0.62	FALSE	No_SigChange	5.66	5.66	5.65	0.01	0.968	0.978	FALSE	No_SigChange	5.9	5.89	5.91	-0.02	0.949	0.959	FALSE	No_SigChange	5.79	5.66	5.91	-0.25	0.411	0.469	FALSE	No_SigChange	exon	exon (NM_153179, exon 36 of 67)	93901	NR_045734	4930486I03Rik	0.024221	0.458621	exon	exon	exon	Other
chr1	20477650	20478340	7.19	7.37	6.99	0.39	0.0704	0.172	FALSE	No_SigChange	7.09	7.37	6.73	0.64	0.0473	0.101	FALSE	No_SigChange	6.62	6.98	6.14	0.84	0.00101	0.00293	TRUE	SigDecrease	6.89	7.37	6.14	1.23	3.29e-06	1.27e-05	TRUE	SigDecrease	intron	G-rich|Low_complexity|Low_complexity	121541	NR_045734	4930486I03Rik	0.036284	0.530435	G-rich	Low_complexity	Low_complexity	Other
chr1	20486220	20486580	5.2	5.56	4.71	0.85	0.00801	0.0324	FALSE	No_SigChange	5.59	5.56	5.62	-0.06	0.842	0.885	FALSE	No_SigChange	5.06	4.71	5.35	-0.64	0.066	0.0994	FALSE	No_SigChange	5.46	5.56	5.35	0.21	0.502	0.559	FALSE	No_SigChange	intron	L1Md_A|LINE|L1	129946	NR_045734	4930486I03Rik	0.044568	0.583333	L1Md_A	L1	LINE	LINE
chr1	20486850	20487170	3.02	3.21	2.81	0.4	0.516	0.688	FALSE	No_SigChange	3.52	3.21	3.78	-0.57	0.272	0.374	FALSE	No_SigChange	3.34	2.81	3.73	-0.92	0.103	0.145	FALSE	No_SigChange	3.49	3.21	3.73	-0.52	0.329	0.386	FALSE	No_SigChange	intron	L1Md_A|LINE|L1	130556	NR_045734	4930486I03Rik	0.059561	0.6375	L1Md_A	L1	LINE	LINE
chr1	20513750	20513950	4.6	4.97	4.11	0.86	0.05	0.133	FALSE	No_SigChange	4.83	4.96	4.69	0.28	0.461	0.563	FALSE	No_SigChange	4.46	4.11	4.74	-0.63	0.154	0.204	FALSE	No_SigChange	4.86	4.96	4.74	0.22	0.564	0.618	FALSE	No_SigChange	intron	intron (NM_153179, intron 33 of 66)	104207	NM_153179	Pkhd1	0	0.395	intron	intron	intron	Other
chr1	20544510	20544790	5.67	5.67	5.67	0.01	0.98	0.99	FALSE	No_SigChange	5.93	5.67	6.14	-0.47	0.107	0.184	FALSE	No_SigChange	5.96	5.66	6.21	-0.55	0.0367	0.0603	FALSE	No_SigChange	5.96	5.67	6.21	-0.54	0.0527	0.0756	FALSE	No_SigChange	intron	MER5A1|DNA|hAT-Charlie	73407	NM_153179	Pkhd1	0.003584	0.467857	MER5A1	hAT-Charlie	DNA	Other
chr1	20554410	20554650	5.44	5.5	5.37	0.12	0.654	0.793	FALSE	No_SigChange	5.14	5.5	4.66	0.84	0.0109	0.0353	FALSE	No_SigChange	5.29	5.37	5.21	0.16	0.594	0.65	FALSE	No_SigChange	5.36	5.5	5.21	0.29	0.336	0.393	FALSE	No_SigChange	intron	intron (NM_153179, intron 22 of 66)	63527	NM_153179	Pkhd1	0.012552	0.458333	intron	intron	intron	Other
chr1	20612730	20613090	5.55	5.39	5.7	-0.31	0.279	0.462	FALSE	No_SigChange	5.55	5.39	5.69	-0.3	0.348	0.453	FALSE	No_SigChange	5.8	5.7	5.89	-0.19	0.502	0.564	FALSE	No_SigChange	5.66	5.39	5.89	-0.5	0.0959	0.129	FALSE	No_SigChange	intron	intron (NM_153179, intron 3 of 66)	5147	NM_153179	Pkhd1	0.016713	0.444444	intron	intron	intron	Other
chr1	20733620	20733780	4.2	4.43	3.93	0.5	0.261	0.441	FALSE	No_SigChange	3.75	4.42	2.46	1.97	0.00148	0.00808	TRUE	SigDecrease	3.81	3.93	3.67	0.26	0.605	0.661	FALSE	No_SigChange	4.1	4.42	3.67	0.75	0.102	0.136	FALSE	No_SigChange	exon	exon (NM_010552, exon 3 of 3)	2795	NM_010552	Il17a	0.025157	0.5625	exon	exon	exon	Other
chr1	20760260	20760640	5.67	4.54	6.3	-1.76	0.00289	0.0144	FALSE	No_SigChange	4.31	4.54	4.04	0.49	0.34	0.445	FALSE	No_SigChange	5.94	6.3	5.47	0.83	0.00249	0.00627	TRUE	SigDecrease	5.08	4.54	5.47	-0.93	0.0397	0.0587	FALSE	No_SigChange	Intergenic	Intergenic	23820	NM_145856	Il17f	0.013193	0.442105	Intergenic	Intergenic	Intergenic	Other
chr1	20774360	20774740	5.56	5.66	5.45	0.21	0.501	0.675	FALSE	No_SigChange	5.58	5.66	5.49	0.17	0.613	0.699	FALSE	No_SigChange	5.46	5.45	5.47	-0.02	0.957	0.966	FALSE	No_SigChange	5.56	5.66	5.47	0.19	0.535	0.59	FALSE	No_SigChange	Intergenic	ERVB7_2-LTR_MM|LTR|ERVK	9720	NM_145856	Il17f	0.007916	0.468421	ERVB7_2-LTR_MM	ERVK	LTR	LTR
chr1	20786660	20787710	8.04	8.06	8.02	0.05	0.795	0.886	FALSE	No_SigChange	8.1	8.06	8.14	-0.08	0.728	0.795	FALSE	No_SigChange	7.83	8.02	7.62	0.39	0.0856	0.124	FALSE	No_SigChange	7.86	8.06	7.62	0.44	0.0472	0.0685	FALSE	No_SigChange	Intergenic	MLT1I|LTR|ERVL-MaLR	-2915	NM_145856	Il17f	0.019066	0.482857	MLT1I	ERVL-MaLR	LTR	LTR
chr1	20801870	20802110	5.22	5.1	5.34	-0.24	0.494	0.669	FALSE	No_SigChange	4.61	5.1	3.86	1.24	0.0225	0.0591	FALSE	No_SigChange	5.1	5.34	4.82	0.52	0.149	0.199	FALSE	No_SigChange	4.96	5.1	4.82	0.28	0.489	0.546	FALSE	No_SigChange	Intergenic	Intergenic	-17720	NM_145856	Il17f	0.004184	0.425	Intergenic	Intergenic	Intergenic	Other
chr1	20819790	20820850	8.99	9.02	8.97	0.05	0.797	0.887	FALSE	No_SigChange	8.82	9.01	8.6	0.41	0.0614	0.122	FALSE	No_SigChange	8.71	8.97	8.4	0.57	0.019	0.0346	FALSE	No_SigChange	8.74	9.01	8.4	0.61	0.00395	0.0075	TRUE	SigDecrease	promoter-TSS	promoter-TSS (NM_008563)	-107	NM_008563	Mcm3	0.050047	0.531132	promoter-TSS	promoter-TSS	promoter-TSS	Other
chr1	20867260	20868270	7.94	7.63	8.19	-0.56	0.0173	0.059	FALSE	No_SigChange	7.16	7.63	6.45	1.18	2e-06	4.32e-05	TRUE	SigDecrease	7.69	8.19	6.9	1.29	4.68e-06	2.92e-05	TRUE	SigDecrease	7.31	7.63	6.9	0.73	0.00689	0.0123	FALSE	No_SigChange	Intergenic	LTR16B|LTR|ERVL	22708	NR_040492	6720483E21Rik	0.012884	0.445545	LTR16B	ERVL	LTR	LTR
chr1	20890110	20891730	9.26	9.36	9.14	0.23	0.241	0.418	FALSE	No_SigChange	9.03	9.36	8.59	0.77	0.00273	0.0128	FALSE	No_SigChange	8.69	9.14	8.03	1.11	3.8e-06	2.44e-05	TRUE	SigDecrease	8.85	9.36	8.03	1.33	2.63e-09	1.97e-08	TRUE	SigDecrease	promoter-TSS	promoter-TSS (NR_040492)	298	NM_028829	Paqr8	0.046325	0.585185	promoter-TSS	promoter-TSS	promoter-TSS	Other
chr1	20905780	20905980	4.69	3.81	5.23	-1.42	0.000779	0.00501	TRUE	SigIncrease	2.98	3.81	0.81	3	0.00029	0.00231	TRUE	SigDecrease	4.61	5.23	3.49	1.74	0.000328	0.00113	TRUE	SigDecrease	3.66	3.81	3.49	0.31	0.624	0.673	FALSE	No_SigChange	intron	intron (NM_028829, intron 1 of 2)	15258	NM_028829	Paqr8	0.005025	0.51	intron	intron	intron	Other
chr1	20908720	20908910	5.37	5.03	5.65	-0.62	0.0322	0.0953	FALSE	No_SigChange	4.47	5.03	3.55	1.48	0.000327	0.00254	TRUE	SigDecrease	4.68	5.65	0.32	5.33	1.05e-13	5.44e-12	TRUE	SigDecrease	4.09	5.03	0.32	4.71	4.15e-10	3.71e-09	TRUE	SigDecrease	intron	intron (NM_028829, intron 1 of 2)	18193	NM_028829	Paqr8	0.005291	0.442105	intron	intron	intron	Other
chr1	20933440	20933730	5.43	5.57	5.29	0.28	0.344	0.532	FALSE	No_SigChange	5.51	5.57	5.45	0.12	0.724	0.792	FALSE	No_SigChange	5.21	5.28	5.13	0.15	0.617	0.672	FALSE	No_SigChange	5.36	5.57	5.13	0.44	0.188	0.235	FALSE	No_SigChange	intron	intron (NM_028829, intron 2 of 2)	-18041	NM_027974	Efhc1	0.024221	0.47931	intron	intron	intron	Other
chr1	20935310	20935470	4.42	4.73	4.02	0.71	0.0681	0.168	FALSE	No_SigChange	4.27	4.73	3.58	1.14	0.0097	0.0325	FALSE	No_SigChange	3.55	4.02	2.86	1.16	0.0368	0.0604	FALSE	No_SigChange	4.07	4.73	2.86	1.87	0.000208	0.000537	TRUE	SigDecrease	exon	exon (NM_028829, exon 3 of 3)	-16236	NM_027974	Efhc1	0.062893	0.61875	exon	exon	exon	Other
chr1	20939040	20939280	5.73	5.79	5.67	0.12	0.633	0.778	FALSE	No_SigChange	5.6	5.79	5.37	0.42	0.17	0.26	FALSE	No_SigChange	5.45	5.67	5.19	0.48	0.147	0.197	FALSE	No_SigChange	5.52	5.79	5.19	0.6	0.066	0.0924	FALSE	No_SigChange	TTS	TTS (NM_028829)	-12466	NM_027974	Efhc1	0.008368	0.429167	TTS	TTS	TTS	Other
chr1	20940260	20940610	5.92	6.05	5.76	0.29	0.312	0.498	FALSE	No_SigChange	5.85	6.05	5.61	0.45	0.183	0.276	FALSE	No_SigChange	5.47	5.76	5.12	0.64	0.0459	0.073	FALSE	No_SigChange	5.66	6.05	5.12	0.93	0.0045	0.00842	TRUE	SigDecrease	Intergenic	(CAGCC)n|Simple_repeat|Simple_repeat	-11191	NM_027974	Efhc1	0.04298	0.568571	(CAGCC)n	Simple_repeat	Simple_repeat	Other
chr1	20943050	20943390	5.21	4.97	5.43	-0.46	0.124	0.261	FALSE	No_SigChange	5.26	4.96	5.5	-0.54	0.105	0.181	FALSE	No_SigChange	5.43	5.42	5.44	-0.02	0.951	0.961	FALSE	No_SigChange	5.22	4.96	5.44	-0.48	0.136	0.177	FALSE	No_SigChange	Intergenic	B3|SINE|B2	-8406	NM_027974	Efhc1	0	0.414706	B3	B2	SINE	SINE
chr1	20951100	20952210	9.34	9.44	9.23	0.21	0.268	0.449	FALSE	No_SigChange	9.33	9.44	9.22	0.22	0.335	0.439	FALSE	No_SigChange	8.99	9.23	8.72	0.51	0.025	0.0436	FALSE	No_SigChange	9.12	9.44	8.72	0.72	0.000477	0.00113	TRUE	SigDecrease	promoter-TSS	promoter-TSS (NM_027974)	29	NM_027974	Efhc1	0.042381	0.579279	promoter-TSS	promoter-TSS	promoter-TSS	Other
chr1	20974670	20975220	5.83	5.6	6.03	-0.43	0.189	0.353	FALSE	No_SigChange	5.61	5.6	5.63	-0.03	0.918	0.943	FALSE	No_SigChange	6.36	6.03	6.64	-0.61	0.0422	0.068	FALSE	No_SigChange	6.21	5.6	6.64	-1.04	0.000121	0.000331	TRUE	SigIncrease	exon	exon (NM_027974, exon 7 of 11)	23319	NM_027974	Efhc1	0.009107	0.410909	exon	exon	exon	Other
chr1	21078320	21079830	9.64	9.68	9.6	0.08	0.707	0.829	FALSE	No_SigChange	9.5	9.68	9.31	0.37	0.111	0.19	FALSE	No_SigChange	9.33	9.6	8.99	0.61	0.0129	0.025	FALSE	No_SigChange	9.38	9.68	8.99	0.69	0.00166	0.00345	TRUE	SigDecrease	exon	exon (NM_177409, exon 1 of 11)	150	NM_177409	Tram2	0.058317	0.625166	exon	exon	exon	Other
chr1	21080370	21080780	6.72	6.79	6.65	0.14	0.568	0.729	FALSE	No_SigChange	6.51	6.79	6.16	0.63	0.0214	0.0569	FALSE	No_SigChange	6.21	6.65	5.58	1.07	0.000803	0.00241	TRUE	SigDecrease	6.31	6.79	5.58	1.21	9.45e-05	0.000264	TRUE	SigDecrease	Intergenic	B4|SINE|B4	-1350	NM_177409	Tram2	0.02934	0.490244	B4	B4	SINE	SINE
chr1	21101230	21101850	6.6	6.41	6.77	-0.36	0.137	0.282	FALSE	No_SigChange	6.53	6.41	6.65	-0.24	0.339	0.443	FALSE	No_SigChange	6.84	6.77	6.91	-0.14	0.61	0.666	FALSE	No_SigChange	6.68	6.41	6.91	-0.5	0.0632	0.0889	FALSE	No_SigChange	Intergenic	Intergenic	-22315	NM_177409	Tram2	0.011309	0.482258	Intergenic	Intergenic	Intergenic	Other
chr1	21161770	21162060	5.57	5.61	5.53	0.08	0.781	0.878	FALSE	No_SigChange	5.73	5.61	5.85	-0.25	0.397	0.501	FALSE	No_SigChange	5.41	5.53	5.28	0.24	0.38	0.445	FALSE	No_SigChange	5.45	5.6	5.28	0.32	0.293	0.348	FALSE	No_SigChange	Intergenic	Intergenic	-56716	NM_029398	Tmem14a	0.017301	0.441379	Intergenic	Intergenic	Intergenic	Other
chr1	21162710	21163030	5.77	5.85	5.68	0.17	0.557	0.721	FALSE	No_SigChange	5.56	5.85	5.2	0.65	0.0537	0.11	FALSE	No_SigChange	4.98	5.68	3.58	2.09	1.01e-07	1.02e-06	TRUE	SigDecrease	5.12	5.85	3.58	2.27	8.32e-08	4.47e-07	TRUE	SigDecrease	Intergenic	Intergenic	-55761	NM_029398	Tmem14a	0.031348	0.58125	Intergenic	Intergenic	Intergenic	Other
chr1	21166140	21166880	7.58	7.71	7.45	0.25	0.275	0.457	FALSE	No_SigChange	7.74	7.7	7.77	-0.07	0.802	0.855	FALSE	No_SigChange	7.36	7.45	7.26	0.19	0.428	0.493	FALSE	No_SigChange	7.5	7.7	7.26	0.44	0.0751	0.104	FALSE	No_SigChange	Intergenic	Intergenic	-52121	NM_029398	Tmem14a	0.024357	0.513514	Intergenic	Intergenic	Intergenic	Other
chr1	21206330	21206730	6.28	6.61	5.85	0.77	0.00504	0.0224	FALSE	No_SigChange	6.37	6.61	6.09	0.52	0.0463	0.0991	FALSE	No_SigChange	6.02	5.84	6.18	-0.34	0.264	0.326	FALSE	No_SigChange	6.41	6.61	6.18	0.42	0.111	0.148	FALSE	No_SigChange	Intergenic	RLTR19-int|LTR|ERVK	-12101	NM_029398	Tmem14a	0.002506	0.4575	RLTR19-int	ERVK	LTR	LTR
chr1	21218380	21219030	7.91	8.02	7.8	0.21	0.286	0.47	FALSE	No_SigChange	7.92	8.01	7.81	0.2	0.389	0.494	FALSE	No_SigChange	7.67	7.8	7.53	0.26	0.271	0.333	FALSE	No_SigChange	7.79	8.01	7.53	0.48	0.0384	0.057	FALSE	No_SigChange	promoter-TSS	5' UTR (NM_029398, exon 1 of 5)	74	NM_029398	Tmem14a	0.035439	0.54	5'UTR	5'UTR	5'UTR	Other
chr1	21253090	21253610	4.38	3.39	4.97	-1.57	0.000125	0.00111	TRUE	SigIncrease	4.13	3.39	4.61	-1.22	0.00624	0.0235	FALSE	No_SigChange	5.53	4.96	5.94	-0.97	0.00157	0.00426	TRUE	SigIncrease	5.16	3.39	5.94	-2.55	3.85e-11	4.31e-10	TRUE	SigIncrease	intron	intron (NM_010356, intron 2 of 6)	12761	NM_010356	Gsta3	0.015414	0.4	intron	intron	intron	Other
chr1	21256030	21256990	7.24	7.65	6.67	0.98	0.000138	0.00121	TRUE	SigDecrease	7.64	7.65	7.64	0.01	0.965	0.976	FALSE	No_SigChange	7.01	6.67	7.28	-0.62	0.0324	0.0543	FALSE	No_SigChange	7.48	7.65	7.28	0.36	0.123	0.162	FALSE	No_SigChange	intron	RMER10B|LTR|ERVL	15921	NM_010356	Gsta3	0.009385	0.5	RMER10B	ERVL	LTR	LTR
chr1	21271470	21272510	7.8	7.94	7.66	0.28	0.102	0.226	FALSE	No_SigChange	8.04	7.94	8.14	-0.21	0.352	0.456	FALSE	No_SigChange	7.71	7.65	7.76	-0.11	0.634	0.688	FALSE	No_SigChange	7.85	7.94	7.76	0.18	0.432	0.49	FALSE	No_SigChange	Intergenic	Intergenic	26322	NR_002858	Gm4956	0.025987	0.513462	Intergenic	Intergenic	Intergenic	Other
chr1	21344350	21344730	5.69	5.31	5.98	-0.67	0.0154	0.0541	FALSE	No_SigChange	5.58	5.31	5.81	-0.5	0.107	0.184	FALSE	No_SigChange	6.1	5.98	6.21	-0.23	0.335	0.4	FALSE	No_SigChange	5.83	5.31	6.21	-0.9	0.00164	0.00341	TRUE	SigIncrease	Intergenic	Intergenic	-5137	NM_183322	Khdc1a	0.010554	0.45	Intergenic	Intergenic	Intergenic	Other
chr1	21393450	21394180	5.89	5.47	6.22	-0.76	0.00486	0.0218	FALSE	No_SigChange	6.27	5.47	6.78	-1.32	1.44e-05	0.000214	TRUE	SigIncrease	6.48	6.22	6.7	-0.48	0.0928	0.133	FALSE	No_SigChange	6.21	5.47	6.7	-1.23	5.62e-05	0.000165	TRUE	SigIncrease	Intergenic	Intergenic	10259	NM_001113187	Khdc1b	0.013717	0.426027	Intergenic	Intergenic	Intergenic	Other
chr1	21411210	21411800	7.03	7.31	6.69	0.62	0.00254	0.013	FALSE	No_SigChange	7.1	7.31	6.86	0.45	0.0576	0.116	FALSE	No_SigChange	6.51	6.69	6.3	0.39	0.195	0.251	FALSE	No_SigChange	6.89	7.31	6.3	1.01	0.000538	0.00126	TRUE	SigDecrease	intron	intron (NM_001160139, intron 12 of 14)	27949	NM_001113187	Khdc1b	0.018676	0.455932	intron	intron	intron	Other
chr1	21461050	21461540	6.61	6.27	6.89	-0.62	0.0107	0.0405	FALSE	No_SigChange	6.35	6.27	6.42	-0.16	0.592	0.681	FALSE	No_SigChange	6.71	6.89	6.49	0.39	0.0938	0.134	FALSE	No_SigChange	6.38	6.26	6.49	-0.23	0.382	0.44	FALSE	No_SigChange	intron	intron (NM_023872, intron 9 of 13)	77739	NM_001113187	Khdc1b	0.030675	0.485714	intron	intron	intron	Other
chr1	21522080	21522450	5.75	5.38	6.05	-0.67	0.0201	0.0665	FALSE	No_SigChange	5.49	5.38	5.58	-0.2	0.478	0.579	FALSE	No_SigChange	6.13	6.05	6.2	-0.15	0.578	0.636	FALSE	No_SigChange	5.85	5.38	6.2	-0.82	0.00169	0.00351	TRUE	SigIncrease	intron	intron (NM_001160139, intron 3 of 14)	138709	NM_001113187	Khdc1b	0.0271	0.47027	intron	intron	intron	Other
chr1	21537750	21538150	4.45	4.39	4.51	-0.12	0.763	0.866	FALSE	No_SigChange	5.27	4.39	5.81	-1.42	9.69e-05	0.000983	TRUE	SigIncrease	5.59	4.51	6.2	-1.69	1.7e-08	2.14e-07	TRUE	SigIncrease	5.56	4.39	6.2	-1.81	6.11e-08	3.39e-07	TRUE	SigIncrease	intron	RLTR23|LTR|ERV1	154394	NM_001113187	Khdc1b	0.002506	0.4625	RLTR23	ERV1	LTR	LTR
chr1	21672520	21672760	5.18	5.67	4.43	1.25	0.00109	0.00657	TRUE	SigDecrease	5.17	5.67	4.41	1.26	0.00845	0.0294	FALSE	No_SigChange	4.21	4.42	3.95	0.47	0.277	0.34	FALSE	No_SigChange	5.05	5.67	3.95	1.72	5.02e-05	0.000149	TRUE	SigDecrease	intron	intron (NM_001160139, intron 1 of 14)	289084	NM_001113187	Khdc1b	0	0.483333	intron	intron	intron	Other
chr1	21673540	21673790	5.06	5.04	5.08	-0.03	0.93	0.964	FALSE	No_SigChange	5.13	5.04	5.22	-0.18	0.678	0.754	FALSE	No_SigChange	4.82	5.07	4.52	0.55	0.125	0.171	FALSE	No_SigChange	4.81	5.04	4.52	0.52	0.211	0.261	FALSE	No_SigChange	intron	RLTR41|LTR|ERV1	288277	NM_023872	Kcnq5	0.02008	0.488	RLTR41	ERV1	LTR	LTR
chr1	21960400	21962610	10.08	9.98	10.18	-0.21	0.306	0.492	FALSE	No_SigChange	9.94	9.98	9.9	0.08	0.751	0.814	FALSE	No_SigChange	9.97	10.18	9.71	0.47	0.0674	0.101	FALSE	No_SigChange	9.85	9.97	9.71	0.26	0.272	0.326	FALSE	No_SigChange	exon	exon (NM_023872, exon 1 of 14)	437	NM_023872	Kcnq5	0.073336	0.640271	exon	exon	exon	Other
chr1	21983090	21983450	5.12	4.73	5.43	-0.7	0.0236	0.0751	FALSE	No_SigChange	4.64	4.73	4.55	0.17	0.657	0.737	FALSE	No_SigChange	5.47	5.42	5.52	-0.1	0.72	0.764	FALSE	No_SigChange	5.18	4.73	5.52	-0.8	0.0118	0.02	FALSE	No_SigChange	Intergenic	Intergenic	-21328	NM_001160139	Kcnq5	0.005571	0.45	Intergenic	Intergenic	Intergenic	Other
chr1	22002390	22002740	4.25	2	5.09	-3.09	9.26e-09	3.57e-07	TRUE	SigIncrease	2.95	2	3.52	-1.52	0.0518	0.108	FALSE	No_SigChange	5.82	5.09	6.3	-1.21	0.000433	0.00143	TRUE	SigIncrease	5.37	2	6.3	-4.3	2.56e-16	9.09e-15	TRUE	SigIncrease	Intergenic	Lx|LINE|L1	-40623	NM_001160139	Kcnq5	0.020057	0.505714	Lx	L1	LINE	LINE
chr1	22268910	22269370	5.67	5.46	5.86	-0.4	0.166	0.322	FALSE	No_SigChange	5.78	5.46	6.04	-0.59	0.0748	0.141	FALSE	No_SigChange	5.98	5.86	6.1	-0.24	0.402	0.468	FALSE	No_SigChange	5.81	5.46	6.1	-0.64	0.0574	0.0816	FALSE	No_SigChange	Intergenic	Intergenic	163703	NM_053270	Rims1	0.015251	0.393478	Intergenic	Intergenic	Intergenic	Other
chr1	22282950	22283100	5.42	5	5.75	-0.75	0.00932	0.0365	FALSE	No_SigChange	4.99	5	4.99	0.01	0.975	0.983	FALSE	No_SigChange	5.91	5.75	6.05	-0.3	0.307	0.371	FALSE	No_SigChange	5.62	5	6.05	-1.05	0.000566	0.00132	TRUE	SigIncrease	Intergenic	MMERGLN_LTR|LTR|ERV1	149818	NM_053270	Rims1	0	0.293333	MMERGLN_LTR	ERV1	LTR	LTR
chr1	22284240	22284520	3.3	3.04	3.52	-0.48	0.479	0.657	FALSE	No_SigChange	3.66	3.04	4.09	-1.04	0.0926	0.165	FALSE	No_SigChange	4.47	3.52	5.04	-1.52	0.000638	0.00199	TRUE	SigIncrease	4.37	3.04	5.04	-2	3.08e-05	9.59e-05	TRUE	SigIncrease	Intergenic	Lx4B|LINE|L1	148463	NM_053270	Rims1	0	0.539286	Lx4B	L1	LINE	LINE
chr1	22293970	22294500	7.06	6.81	7.28	-0.47	0.0385	0.109	FALSE	No_SigChange	6.24	6.81	5.29	1.51	3.62e-07	1.07e-05	TRUE	SigDecrease	6.61	7.27	5.32	1.95	1.14e-11	3.37e-10	TRUE	SigDecrease	6.25	6.81	5.32	1.49	8.56e-07	3.72e-06	TRUE	SigDecrease	intron	intron (NM_001012623, intron 11 of 14)	138608	NM_053270	Rims1	0.007561	0.396226	intron	intron	intron	Other
chr1	22307790	22308110	5.52	5.89	5.01	0.88	0.000697	0.00459	TRUE	SigDecrease	5.78	5.89	5.66	0.24	0.48	0.581	FALSE	No_SigChange	4.52	5.01	3.78	1.23	0.00564	0.0125	FALSE	No_SigChange	5.19	5.89	3.78	2.11	2.08e-07	1.03e-06	TRUE	SigDecrease	intron	MLT1C|LTR|ERVL-MaLR	124893	NM_053270	Rims1	0.015674	0.478125	MLT1C	ERVL-MaLR	LTR	LTR
chr1	22377140	22378220	6.93	6.97	6.88	0.09	0.688	0.816	FALSE	No_SigChange	7.09	6.97	7.2	-0.23	0.338	0.442	FALSE	No_SigChange	6.72	6.88	6.53	0.35	0.18	0.234	FALSE	No_SigChange	6.77	6.97	6.53	0.43	0.0875	0.119	FALSE	No_SigChange	intron	RSINE1|SINE|B4	55163	NM_053270	Rims1	0.012975	0.431481	RSINE1	B4	SINE	SINE
chr1	22386670	22386910	3.21	2.91	3.46	-0.55	0.437	0.62	FALSE	No_SigChange	3.09	2.91	3.25	-0.34	0.62	0.705	FALSE	No_SigChange	3.74	3.46	3.98	-0.52	0.34	0.405	FALSE	No_SigChange	3.54	2.9	3.98	-1.07	0.0687	0.0958	FALSE	No_SigChange	intron	intron (NM_001012623, intron 7 of 14)	46053	NM_053270	Rims1	0.004184	0.333333	intron	intron	intron	Other
chr1	22387100	22387390	5.1	4.51	5.52	-1.02	0.00114	0.00681	TRUE	SigIncrease	4.89	4.51	5.19	-0.68	0.0494	0.104	FALSE	No_SigChange	5.35	5.52	5.15	0.37	0.183	0.237	FALSE	No_SigChange	4.86	4.51	5.15	-0.64	0.0569	0.0808	FALSE	No_SigChange	intron	Lx4B|LINE|L1	45598	NM_053270	Rims1	0.00692	0.531034	Lx4B	L1	LINE	LINE
chr1	22466580	22467480	7.28	6.72	7.68	-0.96	3.09e-05	0.000351	TRUE	SigIncrease	6.75	6.72	6.77	-0.04	0.87	0.907	FALSE	No_SigChange	7.8	7.68	7.92	-0.24	0.292	0.355	FALSE	No_SigChange	7.44	6.72	7.92	-1.2	1.14e-05	3.88e-05	TRUE	SigIncrease	Intergenic	RLTR13C3|LTR|ERVK	-34187	NM_183018	Rims1	0.006674	0.422222	RLTR13C3	ERVK	LTR	LTR
chr1	22487250	22487650	5.19	4.94	5.4	-0.46	0.192	0.357	FALSE	No_SigChange	4.79	4.94	4.61	0.33	0.431	0.535	FALSE	No_SigChange	4.98	5.4	4.39	1.01	0.00485	0.011	FALSE	No_SigChange	4.69	4.94	4.39	0.55	0.197	0.245	FALSE	No_SigChange	intron	intron (NM_001012623, intron 8 of 14).2	-54607	NM_183018	Rims1	0.012531	0.3925	intron	intron	intron	Other
chr1	22512440	22512750	5.26	4.67	5.67	-1	0.00148	0.00842	TRUE	SigIncrease	4.24	4.67	3.61	1.06	0.24	0.34	FALSE	No_SigChange	5.22	5.67	4.55	1.12	0.00138	0.00381	TRUE	SigDecrease	4.61	4.67	4.55	0.12	0.766	0.801	FALSE	No_SigChange	intron	intron (NM_001012623, intron 8 of 14).2	-79752	NM_183018	Rims1	0.035599	0.506452	intron	intron	intron	Other
chr1	22519610	22519820	4.76	4.36	5.08	-0.72	0.0348	0.101	FALSE	No_SigChange	4.05	4.36	3.67	0.68	0.138	0.223	FALSE	No_SigChange	4.93	5.07	4.78	0.29	0.407	0.473	FALSE	No_SigChange	4.58	4.36	4.78	-0.43	0.296	0.352	FALSE	No_SigChange	intron	ORR1B1-int|LTR|ERVL-MaLR	-86872	NM_183018	Rims1	0	0.442857	ORR1B1-int	ERVL-MaLR	LTR	LTR
chr1	22533070	22534220	9.64	9.51	9.76	-0.25	0.201	0.369	FALSE	No_SigChange	9.4	9.5	9.29	0.21	0.4	0.505	FALSE	No_SigChange	9.52	9.76	9.23	0.53	0.0533	0.0829	FALSE	No_SigChange	9.37	9.5	9.23	0.27	0.309	0.365	FALSE	No_SigChange	intron	CpG-67	-100802	NM_183018	Rims1	0.106179	0.67913	CpG	CpG	CpG	Other
chr1	22805300	22806700	8.7	8.64	8.75	-0.11	0.604	0.757	FALSE	No_SigChange	8.62	8.64	8.6	0.04	0.886	0.919	FALSE	No_SigChange	8.49	8.75	8.17	0.58	0.0233	0.0411	FALSE	No_SigChange	8.42	8.64	8.17	0.47	0.0636	0.0893	FALSE	No_SigChange	promoter-TSS	promoter-TSS (NM_001012625)	-276	NM_001012625	Rims1	0.064332	0.650714	promoter-TSS	promoter-TSS	promoter-TSS	Other
chr1	23061910	23062430	6.89	6.7	7.06	-0.36	0.125	0.262	FALSE	No_SigChange	6.77	6.7	6.83	-0.14	0.593	0.682	FALSE	No_SigChange	7	7.06	6.94	0.12	0.606	0.662	FALSE	No_SigChange	6.82	6.69	6.94	-0.24	0.285	0.341	FALSE	No_SigChange	Intergenic	Intergenic	40083	NM_025746	4933415F23Rik	0.019268	0.448077	Intergenic	Intergenic	Intergenic	Other
chr1	23115020	23115320	3.7	3.58	3.81	-0.22	0.687	0.816	FALSE	No_SigChange	4.14	3.58	4.54	-0.96	0.0323	0.0765	FALSE	No_SigChange	4.45	3.8	4.89	-1.09	0.0147	0.0279	FALSE	No_SigChange	4.38	3.58	4.89	-1.31	0.00128	0.00273	TRUE	SigIncrease	Intergenic	Intergenic	-12917	NM_025746	4933415F23Rik	0.010033	0.46	Intergenic	Intergenic	Intergenic	Other
chr1	23255720	23257300	9.82	9.79	9.85	-0.05	0.79	0.883	FALSE	No_SigChange	9.68	9.79	9.55	0.24	0.291	0.394	FALSE	No_SigChange	9.63	9.85	9.38	0.47	0.0563	0.0868	FALSE	No_SigChange	9.6	9.79	9.38	0.41	0.0531	0.0761	FALSE	No_SigChange	Intergenic	CpG	-15759	NR_029533	Mir30a	0.090564	0.614557	CpG	CpG	CpG	Other
chr1	23286570	23287030	6.32	6.17	6.45	-0.27	0.293	0.477	FALSE	No_SigChange	5.81	6.17	5.32	0.85	0.00218	0.0108	FALSE	No_SigChange	5.79	6.44	4.57	1.88	5.28e-09	7.66e-08	TRUE	SigDecrease	5.58	6.17	4.57	1.6	7.74e-08	4.19e-07	TRUE	SigDecrease	Intergenic	Intergenic	-4901	NR_029717	Mir30c-2	0.015251	0.408696	Intergenic	Intergenic	Intergenic	Other
chr1	23372940	23373260	5.2	4.79	5.52	-0.73	0.026	0.0807	FALSE	No_SigChange	4	4.79	2.09	2.71	5.81e-06	0.000102	TRUE	SigDecrease	5.38	5.52	5.22	0.3	0.419	0.484	FALSE	No_SigChange	5.02	4.79	5.22	-0.43	0.278	0.333	FALSE	No_SigChange	intron	intron (NM_001081079, intron 6 of 6)	10075	NM_001081079	Ogfrl1	0.012539	0.4	intron	intron	intron	Other
chr1	23382500	23384050	9.6	9.5	9.7	-0.21	0.305	0.491	FALSE	No_SigChange	9.42	9.49	9.35	0.14	0.559	0.652	FALSE	No_SigChange	9.45	9.7	9.15	0.56	0.0258	0.0447	FALSE	No_SigChange	9.33	9.49	9.15	0.35	0.141	0.182	FALSE	No_SigChange	promoter-TSS	promoter-TSS (NM_001081079)	-100	NM_001081079	Ogfrl1	0.077469	0.641935	promoter-TSS	promoter-TSS	promoter-TSS	Other
chr1	23524390	23525020	6.66	6.77	6.54	0.23	0.367	0.555	FALSE	No_SigChange	6.68	6.77	6.57	0.2	0.509	0.608	FALSE	No_SigChange	6.48	6.54	6.42	0.12	0.611	0.667	FALSE	No_SigChange	6.61	6.77	6.42	0.36	0.167	0.211	FALSE	No_SigChange	Intergenic	MTD|LTR|ERVL-MaLR	-141530	NM_001081079	Ogfrl1	0.009539	0.465079	MTD	ERVL-MaLR	LTR	LTR
chr1	23536860	23537320	3.89	3.55	4.17	-0.62	0.252	0.431	FALSE	No_SigChange	4.59	3.55	5.19	-1.64	0.000378	0.00284	TRUE	SigIncrease	5.42	4.17	6.08	-1.91	5.25e-10	1e-08	TRUE	SigIncrease	5.31	3.55	6.08	-2.53	2.54e-10	2.37e-09	TRUE	SigIncrease	Intergenic	ORR1A3|LTR|ERVL-MaLR	-153915	NM_001081079	Ogfrl1	0.006536	0.495652	ORR1A3	ERVL-MaLR	LTR	LTR
chr1	23539760	23540080	4.52	2.7	5.29	-2.59	2.65e-08	8.76e-07	TRUE	SigIncrease	4.43	2.7	5.2	-2.5	1.48e-07	5.11e-06	TRUE	SigIncrease	5.53	5.29	5.73	-0.43	0.137	0.185	FALSE	No_SigChange	4.89	2.7	5.73	-3.03	5.67e-12	7.67e-11	TRUE	SigIncrease	Intergenic	Intergenic	-156745	NM_001081079	Ogfrl1	0.00627	0.453125	Intergenic	Intergenic	Intergenic	Other
chr1	23639280	23639550	3.86	2.58	4.52	-1.94	0.000834	0.00529	TRUE	SigIncrease	4.27	2.58	5.02	-2.44	8.88e-06	0.000145	TRUE	SigIncrease	4.97	4.52	5.31	-0.79	0.0212	0.0379	FALSE	No_SigChange	4.51	2.58	5.31	-2.73	2.69e-07	1.29e-06	TRUE	SigIncrease	Intergenic	Intergenic	-122511	NM_172124	B3gat2	0.011152	0.455556	Intergenic	Intergenic	Intergenic	Other
chr1	23645170	23645480	3.41	3.36	3.46	-0.1	0.877	0.934	FALSE	No_SigChange	4.38	3.36	4.98	-1.62	0.00544	0.0213	FALSE	No_SigChange	3	3.46	2.32	1.14	0.122	0.168	FALSE	No_SigChange	2.93	3.36	2.32	1.03	0.161	0.205	FALSE	No_SigChange	Intergenic	RMER15|LTR|ERVL	-116601	NM_172124	B3gat2	0.003236	0.448387	RMER15	ERVL	LTR	LTR
chr1	23674840	23675360	4.71	4.64	4.78	-0.14	0.734	0.847	FALSE	No_SigChange	4.55	4.64	4.44	0.2	0.654	0.734	FALSE	No_SigChange	5.64	4.78	6.18	-1.4	5.97e-07	4.83e-06	TRUE	SigIncrease	5.61	4.64	6.18	-1.54	1.44e-05	4.83e-05	TRUE	SigIncrease	Intergenic	Intergenic	-86826	NM_172124	B3gat2	0.00578	0.396154	Intergenic	Intergenic	Intergenic	Other
chr1	23705530	23705920	6.06	6	6.12	-0.12	0.599	0.753	FALSE	No_SigChange	5.88	6	5.76	0.24	0.424	0.527	FALSE	No_SigChange	5.87	6.12	5.55	0.57	0.0233	0.0411	FALSE	No_SigChange	5.79	6	5.55	0.44	0.0953	0.128	FALSE	No_SigChange	Intergenic	Intergenic	-56201	NM_172124	B3gat2	0.012853	0.474359	Intergenic	Intergenic	Intergenic	Other
chr1	23761480	23764120	10.06	10.04	10.07	-0.03	0.893	0.943	FALSE	No_SigChange	9.96	10.04	9.86	0.18	0.435	0.538	FALSE	No_SigChange	9.81	10.07	9.49	0.58	0.0209	0.0375	FALSE	No_SigChange	9.79	10.04	9.49	0.55	0.0206	0.0327	FALSE	No_SigChange	exon	exon (NM_172124, exon 1 of 4)	874	NM_172124	B3gat2	0.059871	0.61553	exon	exon	exon	Other
chr1	23792900	23793260	6.12	6.1	6.15	-0.05	0.854	0.921	FALSE	No_SigChange	6.17	6.1	6.24	-0.14	0.648	0.729	FALSE	No_SigChange	6.15	6.15	6.14	0	0.989	0.992	FALSE	No_SigChange	6.12	6.1	6.14	-0.05	0.875	0.896	FALSE	No_SigChange	intron	MTEa|LTR|ERVL-MaLR	31154	NM_172124	B3gat2	0.013928	0.497222	MTEa	ERVL-MaLR	LTR	LTR
chr1	23826390	23827750	7.9	7.49	8.22	-0.73	0.000462	0.00328	TRUE	SigIncrease	7.76	7.49	7.99	-0.5	0.0322	0.0764	FALSE	No_SigChange	8.34	8.22	8.45	-0.23	0.3	0.363	FALSE	No_SigChange	8.05	7.49	8.45	-0.95	4.83e-06	1.79e-05	TRUE	SigIncrease	intron	intron (NM_172124, intron 2 of 3)	65144	NM_172124	B3gat2	0.013981	0.455882	intron	intron	intron	Other
chr1	23869710	23869970	4.52	4.04	4.88	-0.84	0.0303	0.0909	FALSE	No_SigChange	3.52	4.04	2.7	1.34	0.0185	0.0513	FALSE	No_SigChange	4.14	4.88	2.52	2.36	3.9e-05	0.000182	TRUE	SigDecrease	3.47	4.04	2.52	1.52	0.0202	0.0321	FALSE	No_SigChange	intron	intron (NM_001290683, intron 4 of 9)	52449	NM_028534	Smap1	0.015444	0.496154	intron	intron	intron	Other
chr1	23921590	23922650	8.51	8.39	8.62	-0.23	0.252	0.432	FALSE	No_SigChange	8.36	8.39	8.33	0.06	0.801	0.853	FALSE	No_SigChange	8.57	8.62	8.52	0.1	0.658	0.709	FALSE	No_SigChange	8.46	8.39	8.52	-0.13	0.599	0.65	FALSE	No_SigChange	exon	exon (NM_028534, exon 1 of 10)	169	NM_028534	Smap1	0.11237	0.690566	exon	exon	exon	Other
chr1	23934860	23935570	7.77	7.54	7.98	-0.44	0.0532	0.139	FALSE	No_SigChange	7.49	7.54	7.45	0.08	0.767	0.827	FALSE	No_SigChange	7.55	7.97	6.95	1.02	5.07e-06	3.13e-05	TRUE	SigDecrease	7.27	7.53	6.95	0.58	0.0172	0.0278	FALSE	No_SigChange	Intergenic	Intergenic	-12926	NM_028534	Smap1	0.011283	0.526761	Intergenic	Intergenic	Intergenic	Other
chr1	23949090	23949550	5.57	4.43	6.2	-1.78	5.29e-08	1.58e-06	TRUE	SigIncrease	4.13	4.42	3.75	0.67	0.166	0.256	FALSE	No_SigChange	5.81	6.2	5.27	0.94	0.00143	0.00393	TRUE	SigDecrease	4.91	4.42	5.27	-0.84	0.0346	0.0519	FALSE	No_SigChange	Intergenic	Intergenic	-27031	NM_028534	Smap1	0.015251	0.441304	Intergenic	Intergenic	Intergenic	Other
chr1	23958640	23959880	8.31	8.32	8.31	0	0.991	0.996	FALSE	No_SigChange	8.3	8.31	8.29	0.02	0.934	0.954	FALSE	No_SigChange	8.02	8.31	7.65	0.66	0.00728	0.0154	FALSE	No_SigChange	8.02	8.31	7.65	0.67	0.00696	0.0124	FALSE	No_SigChange	Intergenic	ID4_|SINE|ID	-36971	NM_028534	Smap1	0.017756	0.505645	ID4_	ID	SINE	SINE
chr1	23961670	23961950	3.44	2.25	4.09	-1.84	0.00236	0.0122	FALSE	No_SigChange	1.52	2.25	0	2.25	0.0619	0.122	FALSE	No_SigChange	3.86	4.09	3.58	0.5	0.36	0.425	FALSE	No_SigChange	3.06	2.25	3.58	-1.34	0.0842	0.115	FALSE	No_SigChange	Intergenic	B1_Mur3|SINE|Alu	-39521	NM_028534	Smap1	0.007168	0.567857	B1_Mur3	Alu	SINE	SINE
chr1	23968240	23968840	6.57	6.13	6.9	-0.77	0.00641	0.0271	FALSE	No_SigChange	5.97	6.13	5.79	0.33	0.333	0.438	FALSE	No_SigChange	6.42	6.9	5.71	1.2	4.32e-05	0.000199	TRUE	SigDecrease	5.93	6.13	5.71	0.42	0.229	0.28	FALSE	No_SigChange	Intergenic	RMER1A|Other|Other	37100	NM_026503	1110058L19Rik	0.015025	0.576667	RMER1A	Other	Other	Other
chr1	23971360	23972000	6.32	5.58	6.81	-1.24	1.65e-08	5.82e-07	TRUE	SigIncrease	5.34	5.58	5.07	0.51	0.13	0.214	FALSE	No_SigChange	6.39	6.81	5.81	1	0.000196	0.000727	TRUE	SigDecrease	5.7	5.58	5.81	-0.23	0.456	0.514	FALSE	No_SigChange	Intergenic	RLTRETN_Mm|LTR|ERVK	33960	NM_026503	1110058L19Rik	0.018779	0.479687	RLTRETN_Mm	ERVK	LTR	LTR
chr1	23995450	23995680	4.62	2.17	5.48	-3.31	1.14e-11	1.05e-09	TRUE	SigIncrease	3.3	2.17	3.93	-1.76	0.0102	0.0335	FALSE	No_SigChange	5.2	5.48	4.84	0.64	0.0352	0.0583	FALSE	No_SigChange	4.05	2.17	4.84	-2.68	9.11e-07	3.94e-06	TRUE	SigIncrease	TTS	TTS (NM_026503)	10075	NM_026503	1110058L19Rik	0.0131	0.530435	TTS	TTS	TTS	Other
chr1	24001620	24001980	5.16	4.17	5.75	-1.58	1.57e-06	2.86e-05	TRUE	SigIncrease	4.35	4.17	4.51	-0.34	0.468	0.57	FALSE	No_SigChange	5.56	5.75	5.34	0.41	0.127	0.174	FALSE	No_SigChange	4.87	4.17	5.34	-1.17	0.00124	0.00267	TRUE	SigIncrease	intron	B1_Mur3|SINE|Alu	3840	NM_026503	1110058L19Rik	0.013928	0.491667	B1_Mur3	Alu	SINE	SINE
chr1	24005290	24005880	7.88	7.98	7.77	0.22	0.241	0.418	FALSE	No_SigChange	7.8	7.98	7.6	0.38	0.106	0.183	FALSE	No_SigChange	7.68	7.76	7.6	0.16	0.485	0.549	FALSE	No_SigChange	7.8	7.98	7.6	0.38	0.121	0.158	FALSE	No_SigChange	promoter-TSS	promoter-TSS (NM_026503)	55	NM_026503	1110058L19Rik	0.078098	0.566102	promoter-TSS	promoter-TSS	promoter-TSS	Other
chr1	24050710	24051080	5.63	5.62	5.64	-0.02	0.943	0.971	FALSE	No_SigChange	4.86	5.62	3.13	2.49	7.42e-08	2.93e-06	TRUE	SigDecrease	4.92	5.64	3.43	2.22	5.79e-08	6.28e-07	TRUE	SigDecrease	4.9	5.62	3.43	2.19	8.46e-07	3.68e-06	TRUE	SigDecrease	intron	intron (NM_026604, intron 9 of 20)	-45255	NM_026503	1110058L19Rik	0.00271	0.408108	intron	intron	intron	Other
chr1	24068580	24069130	5.35	3.32	6.16	-2.84	6.55e-15	1.59e-12	TRUE	SigIncrease	2.91	3.32	2.32	1	0.155	0.243	FALSE	No_SigChange	6.22	6.16	6.28	-0.12	0.644	0.696	FALSE	No_SigChange	5.46	3.32	6.28	-2.96	1.23e-16	4.65e-15	TRUE	SigIncrease	intron	IAPLTR2_Mm|LTR|ERVK	31486	NM_026604	Fam135a	0.030965	0.52	IAPLTR2_Mm	ERVK	LTR	LTR
chr1	24099340	24101330	10.04	9.99	10.09	-0.1	0.583	0.74	FALSE	No_SigChange	9.92	9.99	9.84	0.15	0.507	0.605	FALSE	No_SigChange	9.95	10.09	9.8	0.28	0.216	0.274	FALSE	No_SigChange	9.9	9.99	9.8	0.19	0.366	0.424	FALSE	No_SigChange	promoter-TSS	promoter-TSS (NM_026604)	6	NM_026604	Fam135a	0.072398	0.607538	promoter-TSS	promoter-TSS	promoter-TSS	Other
chr1	24112140	24112420	5.16	4.71	5.5	-0.79	0.0147	0.0522	FALSE	No_SigChange	5.2	4.71	5.56	-0.85	0.0117	0.037	FALSE	No_SigChange	5.12	5.5	4.61	0.88	0.00554	0.0123	FALSE	No_SigChange	4.66	4.71	4.61	0.1	0.801	0.832	FALSE	No_SigChange	Intergenic	Intergenic	-11939	NM_026604	Fam135a	0.014337	0.507143	Intergenic	Intergenic	Intergenic	Other
chr1	24133850	24134110	5.01	4.55	5.35	-0.79	0.0238	0.0754	FALSE	No_SigChange	4.56	4.55	4.57	-0.02	0.971	0.98	FALSE	No_SigChange	4.99	5.35	4.52	0.82	0.0155	0.0292	FALSE	No_SigChange	4.54	4.55	4.52	0.03	0.94	0.95	FALSE	No_SigChange	Intergenic	Intergenic	-33639	NM_026604	Fam135a	0.061776	0.619231	Intergenic	Intergenic	Intergenic	Other
chr1	24134880	24135100	5.06	5.08	5.04	0.03	0.924	0.96	FALSE	No_SigChange	5.24	5.08	5.38	-0.31	0.342	0.447	FALSE	No_SigChange	4.95	5.04	4.86	0.18	0.588	0.645	FALSE	No_SigChange	4.97	5.07	4.86	0.22	0.516	0.571	FALSE	No_SigChange	Intergenic	Lx9|LINE|L1	-34649	NM_026604	Fam135a	0.004566	0.445455	Lx9	L1	LINE	LINE
chr1	24136980	24137550	6.63	6.35	6.87	-0.52	0.0159	0.0555	FALSE	No_SigChange	6.44	6.35	6.53	-0.18	0.471	0.573	FALSE	No_SigChange	6.73	6.87	6.58	0.29	0.2	0.256	FALSE	No_SigChange	6.47	6.35	6.58	-0.23	0.341	0.399	FALSE	No_SigChange	Intergenic	Intergenic	-36924	NM_026604	Fam135a	0.012302	0.450877	Intergenic	Intergenic	Intergenic	Other
chr1	24164210	24164590	5.48	5.73	5.18	0.55	0.0565	0.146	FALSE	No_SigChange	6.24	5.73	6.61	-0.88	0.000613	0.00412	TRUE	SigIncrease	6.07	5.18	6.62	-1.44	1.98e-07	1.83e-06	TRUE	SigIncrease	6.24	5.73	6.62	-0.89	0.000413	0.000995	TRUE	SigIncrease	Intergenic	RLTR11A|LTR|ERVK	-13210	NM_007740	Col9a1	0.005277	0.447368	RLTR11A	ERVK	LTR	LTR
chr1	24171490	24171720	5.09	4.82	5.31	-0.49	0.156	0.308	FALSE	No_SigChange	4.71	4.82	4.58	0.23	0.612	0.698	FALSE	No_SigChange	4.77	5.31	3.88	1.43	0.000526	0.00169	TRUE	SigDecrease	4.42	4.82	3.88	0.94	0.0665	0.093	FALSE	No_SigChange	Intergenic	Intergenic	-6005	NM_007740	Col9a1	0.0131	0.417391	Intergenic	Intergenic	Intergenic	Other
chr1	24245840	24246520	6.73	6.55	6.9	-0.35	0.13	0.27	FALSE	No_SigChange	6.67	6.55	6.79	-0.24	0.401	0.505	FALSE	No_SigChange	7.08	6.9	7.25	-0.35	0.157	0.208	FALSE	No_SigChange	6.94	6.54	7.25	-0.7	0.0079	0.0139	FALSE	No_SigChange	intron	intron (NM_007740, intron 37 of 37)	68570	NM_007740	Col9a1	0.023564	0.473529	intron	intron	intron	Other
chr1	24249130	24249340	4.64	4.39	4.85	-0.45	0.251	0.429	FALSE	No_SigChange	4.81	4.39	5.13	-0.74	0.0665	0.129	FALSE	No_SigChange	4.4	4.84	3.75	1.09	0.0258	0.0448	FALSE	No_SigChange	4.11	4.39	3.75	0.64	0.267	0.322	FALSE	No_SigChange	intron	intron (NM_007740, intron 37 of 37)	71625	NM_007740	Col9a1	0.004785	0.414286	intron	intron	intron	Other
chr1	24300730	24300940	4.64	3.49	5.27	-1.77	0.0625	0.157	FALSE	No_SigChange	4.03	3.49	4.43	-0.94	0.334	0.439	FALSE	No_SigChange	5.08	5.26	4.86	0.41	0.198	0.254	FALSE	No_SigChange	4.33	3.49	4.86	-1.37	0.158	0.201	FALSE	No_SigChange	intron	B3A|SINE|B2	123225	NM_007740	Col9a1	0.009569	0.433333	B3A	B2	SINE	SINE
chr1	24302680	24303260	6.6	6.62	6.58	0.04	0.85	0.919	FALSE	No_SigChange	6.7	6.62	6.78	-0.16	0.554	0.648	FALSE	No_SigChange	6.59	6.58	6.61	-0.04	0.866	0.891	FALSE	No_SigChange	6.61	6.62	6.61	0	0.992	0.995	FALSE	No_SigChange	intron	intron (NM_007733, intron 37 of 50)	125360	NM_007740	Col9a1	0.020725	0.467241	intron	intron	intron	Other
chr1	24337370	24338010	5.36	4.71	5.8	-1.09	0.00117	0.00697	TRUE	SigIncrease	5.39	4.71	5.85	-1.13	0.0034	0.0151	FALSE	No_SigChange	6.51	5.8	6.99	-1.19	9.36e-07	7.16e-06	TRUE	SigIncrease	6.26	4.71	6.99	-2.28	2.93e-12	4.21e-11	TRUE	SigIncrease	intron	intron (NM_007733, intron 18 of 50)	160080	NM_007740	Col9a1	0.010955	0.471875	intron	intron	intron	Other
chr1	24376190	24376630	5.03	4.52	5.41	-0.89	0.0186	0.0626	FALSE	No_SigChange	5.38	4.52	5.92	-1.4	6.13e-05	0.000685	TRUE	SigIncrease	6.26	5.41	6.79	-1.38	5.61e-07	4.58e-06	TRUE	SigIncrease	6.06	4.52	6.79	-2.27	8.97e-13	1.44e-11	TRUE	SigIncrease	intron	ORR1B1|LTR|ERVL-MaLR	198800	NM_007740	Col9a1	0.004556	0.470455	ORR1B1	ERVL-MaLR	LTR	LTR
chr1	24452580	24452790	4.8	3.86	5.37	-1.51	6.88e-05	0.000684	TRUE	SigIncrease	4.09	3.86	4.29	-0.43	0.365	0.47	FALSE	No_SigChange	4.96	5.36	4.39	0.97	0.0122	0.0238	FALSE	No_SigChange	4.15	3.86	4.39	-0.54	0.241	0.293	FALSE	No_SigChange	intron	intron (NM_007733, intron 13 of 50)	134752	NM_007733	Col19a1	0.014354	0.471429	intron	intron	intron	Other
chr1	24493000	24493170	4.42	4.88	3.73	1.15	0.00312	0.0153	FALSE	No_SigChange	4.61	4.88	4.29	0.6	0.102	0.177	FALSE	No_SigChange	2.83	3.73	0	3.73	4.94e-05	0.000223	TRUE	SigDecrease	3.93	4.88	0	4.88	3.23e-09	2.37e-08	TRUE	SigDecrease	intron	intron (NM_007733, intron 11 of 50)	94352	NM_007733	Col19a1	0.017751	0.494118	intron	intron	intron	Other
chr1	24585990	24587590	8.68	8.79	8.56	0.22	0.219	0.392	FALSE	No_SigChange	8.73	8.78	8.67	0.12	0.612	0.698	FALSE	No_SigChange	8.47	8.56	8.37	0.2	0.428	0.493	FALSE	No_SigChange	8.59	8.78	8.37	0.42	0.0785	0.108	FALSE	No_SigChange	intron	CpG	647	NM_007733	Col19a1	0.061914	0.586875	CpG	CpG	CpG	Other
chr1	24595440	24595600	4.27	2.46	5.04	-2.58	2.06e-07	5.04e-06	TRUE	SigIncrease	3.19	2.46	3.67	-1.21	0.069	0.133	FALSE	No_SigChange	4.55	5.04	3.81	1.24	0.00117	0.00332	TRUE	SigDecrease	3.28	2.46	3.81	-1.35	0.0321	0.0485	FALSE	No_SigChange	Intergenic	Lx2B|LINE|L1	-8083	NM_007733	Col19a1	0.018868	0.5375	Lx2B	L1	LINE	LINE
chr1	24633770	24634130	5.53	5.32	5.72	-0.4	0.259	0.439	FALSE	No_SigChange	5.53	5.32	5.71	-0.39	0.23	0.329	FALSE	No_SigChange	5.91	5.72	6.08	-0.36	0.259	0.32	FALSE	No_SigChange	5.75	5.32	6.08	-0.76	0.0162	0.0263	FALSE	No_SigChange	Intergenic	Intergenic	-44594	NM_026719	Lmbrd1	0.019499	0.436111	Intergenic	Intergenic	Intergenic	Other
chr1	24648170	24648560	5.79	6.18	5.25	0.94	0.00291	0.0145	FALSE	No_SigChange	6.2	6.18	6.22	-0.04	0.899	0.929	FALSE	No_SigChange	5.6	5.25	5.89	-0.64	0.0354	0.0586	FALSE	No_SigChange	6.04	6.18	5.89	0.29	0.34	0.397	FALSE	No_SigChange	Intergenic	RMER13A2|LTR|ERVK	-30179	NM_026719	Lmbrd1	0.028278	0.530769	RMER13A2	ERVK	LTR	LTR
chr1	24675270	24675420	3.71	3	4.19	-1.19	0.0333	0.0977	FALSE	No_SigChange	3.7	3	4.17	-1.17	0.0348	0.0808	FALSE	No_SigChange	4.5	4.19	4.75	-0.57	0.156	0.207	FALSE	No_SigChange	4.13	3	4.75	-1.76	0.000511	0.0012	TRUE	SigIncrease	Intergenic	Intergenic	-3199	NM_026719	Lmbrd1	0	0.4	Intergenic	Intergenic	Intergenic	Other
chr1	24677940	24679470	9.3	9.35	9.24	0.11	0.561	0.724	FALSE	No_SigChange	9.29	9.35	9.23	0.12	0.641	0.723	FALSE	No_SigChange	9.11	9.24	8.97	0.27	0.267	0.328	FALSE	No_SigChange	9.17	9.35	8.97	0.38	0.108	0.143	FALSE	No_SigChange	5'UTR	5' UTR (NM_026719, exon 1 of 16)	161	NM_026719	Lmbrd1	0.055592	0.540523	5'UTR	5'UTR	5'UTR	Other
chr1	24699330	24699740	6.17	5.99	6.32	-0.33	0.162	0.316	FALSE	No_SigChange	5.93	5.99	5.86	0.14	0.61	0.696	FALSE	No_SigChange	5.99	6.32	5.57	0.75	0.00314	0.00764	TRUE	SigDecrease	5.8	5.99	5.57	0.42	0.125	0.164	FALSE	No_SigChange	intron	intron (NM_026719, intron 3 of 15)	20991	NM_026719	Lmbrd1	0.022005	0.526829	intron	intron	intron	Other
chr1	24741000	24741190	5.39	5.58	5.17	0.41	0.26	0.441	FALSE	No_SigChange	5.14	5.58	4.51	1.07	0.0065	0.0242	FALSE	No_SigChange	4.97	5.17	4.74	0.43	0.245	0.305	FALSE	No_SigChange	5.22	5.57	4.74	0.83	0.0159	0.0259	FALSE	No_SigChange	intron	RLTR11A2|LTR|ERVK	62551	NM_026719	Lmbrd1	0.005291	0.447368	RLTR11A2	ERVK	LTR	LTR
chr1	24785000	24785400	3.77	2.17	4.51	-2.34	2.37e-05	0.000282	TRUE	SigIncrease	2.61	2.17	2.95	-0.79	0.295	0.399	FALSE	No_SigChange	5.2	4.51	5.67	-1.17	0.000297	0.00104	TRUE	SigIncrease	4.79	2.17	5.67	-3.5	8.71e-14	1.77e-12	TRUE	SigIncrease	Intergenic	RLTR10B2|LTR|ERVK	106656	NM_026719	Lmbrd1	0.022556	0.4475	RLTR10B2	ERVK	LTR	LTR
chr1	24901320	24901520	4.64	4.7	4.57	0.13	0.746	0.855	FALSE	No_SigChange	4.71	4.7	4.73	-0.03	0.939	0.958	FALSE	No_SigChange	4.64	4.57	4.7	-0.13	0.739	0.782	FALSE	No_SigChange	4.7	4.7	4.7	0	0.997	0.998	FALSE	No_SigChange	Intergenic	Intergenic	222876	NM_026719	Lmbrd1	0.005025	0.425	Intergenic	Intergenic	Intergenic	Other
chr1	24939070	24939310	5.5	5.7	5.26	0.44	0.128	0.268	FALSE	No_SigChange	5.6	5.7	5.5	0.2	0.519	0.617	FALSE	No_SigChange	4.73	5.25	3.88	1.37	0.000158	0.000605	TRUE	SigDecrease	5.06	5.7	3.88	1.82	3.34e-07	1.58e-06	TRUE	SigDecrease	Intergenic	RMER17C|LTR|ERVK	260646	NM_026719	Lmbrd1	0.004184	0.554167	RMER17C	ERVK	LTR	LTR
chr1	25012710	25013250	6.66	6.57	6.74	-0.17	0.445	0.627	FALSE	No_SigChange	6.17	6.57	5.61	0.96	0.0112	0.036	FALSE	No_SigChange	6.35	6.74	5.81	0.93	0.00331	0.008	TRUE	SigDecrease	6.24	6.57	5.81	0.75	0.0218	0.0344	FALSE	No_SigChange	Intergenic	RLTR9A3|LTR|ERVK	264974	NM_001204913	Gm20172	0.001855	0.42963	RLTR9A3	ERVK	LTR	LTR
chr1	25064090	25064450	5.7	5.91	5.44	0.47	0.087	0.201	FALSE	No_SigChange	5.67	5.91	5.38	0.53	0.0528	0.109	FALSE	No_SigChange	4.93	5.44	4.13	1.31	0.000381	0.00128	TRUE	SigDecrease	5.28	5.91	4.13	1.78	3.59e-08	2.09e-07	TRUE	SigDecrease	Intergenic	ERVB7_2B-LTR_MM|LTR|ERVK	213684	NM_001204913	Gm20172	0.027855	0.5	ERVB7_2B-LTR_MM	ERVK	LTR	LTR
chr1	25181800	25182250	6.82	7.02	6.58	0.45	0.0479	0.129	FALSE	No_SigChange	6.33	7.02	4.94	2.08	1.5e-11	2.59e-09	TRUE	SigDecrease	5.85	6.58	4.3	2.27	1.61e-12	5.99e-11	TRUE	SigDecrease	6.23	7.02	4.3	2.72	1.13e-16	4.3e-15	TRUE	SigDecrease	intron	intron (NM_175642, intron 19 of 30)	95929	NM_001204913	Gm20172	0.006682	0.448889	intron	intron	intron	Other
chr1	25228350	25229030	7.3	7.4	7.18	0.23	0.254	0.433	FALSE	No_SigChange	7.19	7.4	6.93	0.48	0.0659	0.128	FALSE	No_SigChange	6.74	7.17	6.11	1.06	5.85e-06	3.54e-05	TRUE	SigDecrease	6.9	7.4	6.11	1.29	4.13e-08	2.37e-07	TRUE	SigDecrease	intron	intron (NM_175642, intron 16 of 30)	49264	NM_001204913	Gm20172	0.048601	0.492647	intron	intron	intron	Other
chr1	25309990	25310500	7.48	7.31	7.63	-0.32	0.126	0.265	FALSE	No_SigChange	6.72	7.31	5.69	1.62	4.03e-07	1.16e-05	TRUE	SigDecrease	6.84	7.63	4.99	2.64	2.16e-17	2.83e-15	TRUE	SigDecrease	6.57	7.31	4.99	2.32	1.45e-13	2.8e-12	TRUE	SigDecrease	intron	intron (NM_175642, intron 16 of 30)	-32291	NM_001204913	Gm20172	0.003929	0.411765	intron	intron	intron	Other
chr1	25510370	25510870	5.58	5.55	5.61	-0.06	0.848	0.918	FALSE	No_SigChange	5.81	5.55	6.03	-0.49	0.171	0.262	FALSE	No_SigChange	5.85	5.6	6.07	-0.46	0.133	0.181	FALSE	No_SigChange	5.83	5.54	6.07	-0.52	0.141	0.182	FALSE	No_SigChange	intron	intron (NM_175642, intron 7 of 30)	-232666	NM_001204913	Gm20172	0.016032	0.446	intron	intron	intron	Other
chr1	25760750	25760930	2.75	1.17	3.49	-2.32	0.00308	0.0152	FALSE	No_SigChange	1.46	1.17	1.7	-0.53	0.631	0.715	FALSE	No_SigChange	4.09	3.49	4.51	-1.02	0.019	0.0346	FALSE	No_SigChange	3.64	1.17	4.51	-3.34	4.01e-07	1.87e-06	TRUE	SigIncrease	intron	intron (NM_175642, intron 2 of 30)	68867	NM_175642	Bai3	0.03352	0.433333	intron	intron	intron	Other
chr1	25829320	25831170	9.39	9.3	9.48	-0.18	0.397	0.583	FALSE	No_SigChange	9.2	9.3	9.1	0.19	0.419	0.523	FALSE	No_SigChange	9.32	9.47	9.14	0.34	0.202	0.259	FALSE	No_SigChange	9.22	9.29	9.14	0.16	0.525	0.581	FALSE	No_SigChange	promoter-TSS	promoter-TSS (NM_175642)	-538	NM_175642	Bai3	0.073553	0.588649	promoter-TSS	promoter-TSS	promoter-TSS	Other
chr1	25888230	25888510	4.72	3.17	5.45	-2.28	1.49e-06	2.75e-05	TRUE	SigIncrease	3.28	3.17	3.39	-0.22	0.723	0.791	FALSE	No_SigChange	5.42	5.45	5.39	0.06	0.879	0.902	FALSE	No_SigChange	4.67	3.17	5.39	-2.22	3.92e-07	1.83e-06	TRUE	SigIncrease	Intergenic	Lx4B|LINE|L1	-58663	NM_175642	Bai3	0.003584	0.439286	Lx4B	L1	LINE	LINE
chr1	26229450	26230200	7.47	7.5	7.44	0.06	0.806	0.893	FALSE	No_SigChange	7.48	7.49	7.46	0.03	0.905	0.933	FALSE	No_SigChange	7.44	7.44	7.44	-0.01	0.975	0.98	FALSE	No_SigChange	7.47	7.49	7.44	0.05	0.841	0.867	FALSE	No_SigChange	Intergenic	RLTR16B_MM|LTR|ERVK	-400118	NM_175642	Bai3	0.006676	0.434667	RLTR16B_MM	ERVK	LTR	LTR
chr1	26388300	26388960	6.84	6.88	6.8	0.08	0.764	0.867	FALSE	No_SigChange	6.19	6.87	4.85	2.03	0.00801	0.0282	FALSE	No_SigChange	6.06	6.8	4.46	2.34	1.45e-14	9.43e-13	TRUE	SigDecrease	6.12	6.87	4.46	2.42	1.25e-15	3.8e-14	TRUE	SigDecrease	Intergenic	Intergenic	298830	NM_001033764	4931408C20Rik	0.009105	0.362121	Intergenic	Intergenic	Intergenic	Other
chr1	26395780	26395930	4.37	4.64	4.02	0.62	0.136	0.28	FALSE	No_SigChange	4.27	4.64	3.75	0.89	0.0455	0.0978	FALSE	No_SigChange	3.67	4.02	3.21	0.81	0.117	0.161	FALSE	No_SigChange	4.1	4.64	3.21	1.43	0.00112	0.00242	TRUE	SigDecrease	Intergenic	Intergenic	291605	NM_001033764	4931408C20Rik	0.006711	0.446667	Intergenic	Intergenic	Intergenic	Other
chr1	26524650	26525060	6.13	6.07	6.18	-0.12	0.658	0.796	FALSE	No_SigChange	6.05	6.06	6.04	0.02	0.943	0.96	FALSE	No_SigChange	6.11	6.18	6.04	0.14	0.625	0.68	FALSE	No_SigChange	6.05	6.06	6.04	0.03	0.935	0.946	FALSE	No_SigChange	Intergenic	RMER1B|Other|Other	162605	NM_001033764	4931408C20Rik	0.00489	0.526829	RMER1B	Other	Other	Other
chr1	27032470	27033150	6.47	6.44	6.49	-0.04	0.862	0.925	FALSE	No_SigChange	6.68	6.44	6.88	-0.44	0.122	0.203	FALSE	No_SigChange	6.46	6.49	6.43	0.06	0.852	0.879	FALSE	No_SigChange	6.44	6.44	6.43	0.01	0.97	0.976	FALSE	No_SigChange	Intergenic	L1Md_F2|LINE|L1	-345350	NM_001033764	4931408C20Rik	0.030928	0.533824	L1Md_F2	L1	LINE	LINE
chr1	27064970	27065170	3.49	3.29	3.67	-0.39	0.516	0.688	FALSE	No_SigChange	3.95	3.28	4.41	-1.13	0.0277	0.0685	FALSE	No_SigChange	4.4	3.67	4.88	-1.21	0.00668	0.0144	FALSE	No_SigChange	4.29	3.28	4.88	-1.6	0.00061	0.00141	TRUE	SigIncrease	Intergenic	RLTR20D|LTR|ERVK	-377610	NM_001033764	4931408C20Rik	0.01005	0.475	RLTR20D	ERVK	LTR	LTR
chr1	27442960	27443410	5.12	4.19	5.68	-1.49	4.32e-06	6.77e-05	TRUE	SigIncrease	4.1	4.19	4	0.19	0.669	0.747	FALSE	No_SigChange	5.51	5.68	5.32	0.36	0.24	0.3	FALSE	No_SigChange	4.86	4.19	5.32	-1.13	0.00145	0.00306	TRUE	SigIncrease	Intergenic	IAPEY_LTR|LTR|ERVK	-755725	NM_001033764	4931408C20Rik	0.046771	0.508889	IAPEY_LTR	ERVK	LTR	LTR
chr1	27900290	27900620	4.44	3.46	5.02	-1.56	0.000349	0.00261	TRUE	SigIncrease	4.48	3.46	5.07	-1.61	0.000201	0.00174	TRUE	SigIncrease	5.16	5.02	5.28	-0.26	0.433	0.498	FALSE	No_SigChange	4.64	3.46	5.28	-1.83	7.29e-06	2.59e-05	TRUE	SigIncrease	Intergenic	Intergenic	879797	NM_001013750	Gm597	0.009119	0.418182	Intergenic	Intergenic	Intergenic	Other
chr1	28087170	28087340	4.49	4.27	4.69	-0.42	0.31	0.495	FALSE	No_SigChange	3.78	4.27	3.04	1.22	0.0532	0.11	FALSE	No_SigChange	4.52	4.68	4.34	0.34	0.378	0.443	FALSE	No_SigChange	4.3	4.26	4.34	-0.07	0.873	0.895	FALSE	No_SigChange	Intergenic	RLTR17|LTR|ERVK	692997	NM_001013750	Gm597	0	0.364706	RLTR17	ERVK	LTR	LTR
chr1	28192870	28193060	3.07	3.52	2.39	1.13	0.0711	0.173	FALSE	No_SigChange	4.09	3.52	4.49	-0.97	0.0323	0.0766	FALSE	No_SigChange	2.75	2.39	3.04	-0.65	0.369	0.434	FALSE	No_SigChange	3.3	3.52	3.04	0.48	0.452	0.51	FALSE	No_SigChange	Intergenic	B3A|SINE|B2	587287	NM_001013750	Gm597	0	0.342105	B3A	B2	SINE	SINE
chr1	28328690	28328970	4.71	4.02	5.17	-1.15	0.00216	0.0114	FALSE	No_SigChange	4.28	4.02	4.51	-0.49	0.26	0.362	FALSE	No_SigChange	5.22	5.17	5.28	-0.11	0.748	0.79	FALSE	No_SigChange	4.78	4.02	5.28	-1.26	0.00074	0.00168	TRUE	SigIncrease	Intergenic	Intergenic	451422	NM_001013750	Gm597	0.010753	0.467857	Intergenic	Intergenic	Intergenic	Other
chr1	28387990	28388320	2.91	3.36	2.25	1.11	0.15	0.3	FALSE	No_SigChange	4.58	3.36	5.24	-1.88	2.86e-06	5.75e-05	TRUE	SigIncrease	4.63	2.25	5.48	-3.24	2.02e-05	0.000103	TRUE	SigIncrease	4.78	3.36	5.48	-2.13	3.78e-08	2.19e-07	TRUE	SigIncrease	Intergenic	RMER17A2|LTR|ERVK	392097	NM_001013750	Gm597	0.018237	0.512121	RMER17A2	ERVK	LTR	LTR
chr1	28622360	28623270	6.46	5.71	6.95	-1.24	1.38e-06	2.57e-05	TRUE	SigIncrease	6.3	5.71	6.72	-1.01	0.000693	0.00453	TRUE	SigIncrease	7.23	6.94	7.47	-0.52	0.0318	0.0534	FALSE	No_SigChange	6.84	5.7	7.47	-1.76	3.03e-10	2.78e-09	TRUE	SigIncrease	Intergenic	(CA)n|Simple_repeat|Simple_repeat	157437	NM_001013750	Gm597	0.017602	0.483516	(CA)n	Simple_repeat	Simple_repeat	Other
chr1	28675490	28675760	4.47	4.82	4	0.82	0.0374	0.107	FALSE	No_SigChange	5.11	4.82	5.36	-0.54	0.15	0.238	FALSE	No_SigChange	4.96	4	5.53	-1.53	1.21e-05	6.66e-05	TRUE	SigIncrease	5.22	4.82	5.53	-0.71	0.0382	0.0567	FALSE	No_SigChange	Intergenic	RLTR41|LTR|ERV1	104627	NM_001013750	Gm597	0.003717	0.496296	RLTR41	ERV1	LTR	LTR
chr1	29566320	29566550	4.24	3.93	4.49	-0.56	0.194	0.36	FALSE	No_SigChange	4.66	3.93	5.14	-1.21	0.00212	0.0106	FALSE	No_SigChange	5.05	4.49	5.45	-0.96	0.0142	0.0271	FALSE	No_SigChange	4.88	3.93	5.45	-1.52	0.000174	0.000458	TRUE	SigIncrease	Intergenic	Lx2|LINE|L1	-786183	NM_001013750	Gm597	0.0131	0.521739	Lx2	L1	LINE	LINE
chr1	29737060	29737470	5.24	5.76	4.43	1.34	7.37e-06	0.000106	TRUE	SigDecrease	5.86	5.76	5.96	-0.2	0.46	0.562	FALSE	No_SigChange	4.32	4.42	4.21	0.22	0.612	0.667	FALSE	No_SigChange	5.18	5.76	4.21	1.55	1.12e-05	3.84e-05	TRUE	SigDecrease	Intergenic	Intergenic	-957013	NM_001013750	Gm597	0.05379	0.536585	Intergenic	Intergenic	Intergenic	Other
chr1	29895310	29895510	3.23	4.15	0	4.15	2.5e-06	4.25e-05	TRUE	SigDecrease	4.39	4.15	4.6	-0.45	0.254	0.355	FALSE	No_SigChange	2.17	0	3	-3	0.00273	0.00679	TRUE	SigIncrease	3.68	4.15	3	1.15	0.0228	0.0358	FALSE	No_SigChange	Intergenic	L1_Mus3|LINE|L1	967846	NM_001081080	Phf3	0.015075	0.38	L1_Mus3	L1	LINE	LINE
chr1	30259580	30259920	4.17	4.27	4.07	0.2	0.633	0.778	FALSE	No_SigChange	4.77	4.27	5.15	-0.88	0.0286	0.07	FALSE	No_SigChange	4.94	4.06	5.47	-1.41	8.25e-05	0.000346	TRUE	SigIncrease	4.99	4.26	5.47	-1.21	0.000551	0.00129	TRUE	SigIncrease	Intergenic	B3A|SINE|B2	603506	NM_001081080	Phf3	0.00885	0.385294	B3A	B2	SINE	SINE
chr1	30548530	30549320	7.18	7.02	7.33	-0.31	0.177	0.337	FALSE	No_SigChange	6.85	7.02	6.65	0.37	0.166	0.257	FALSE	No_SigChange	6.88	7.33	6.22	1.1	3.1e-06	2.05e-05	TRUE	SigDecrease	6.68	7.02	6.22	0.8	0.00312	0.00607	TRUE	SigDecrease	Intergenic	RLTR13E|LTR|ERVK	314331	NM_001081080	Phf3	0.007605	0.406329	RLTR13E	ERVK	LTR	LTR
chr1	30740790	30741120	5.27	5.19	5.35	-0.16	0.584	0.742	FALSE	No_SigChange	5.49	5.19	5.75	-0.56	0.0667	0.129	FALSE	No_SigChange	5.15	5.35	4.93	0.42	0.159	0.211	FALSE	No_SigChange	5.06	5.19	4.93	0.26	0.435	0.493	FALSE	No_SigChange	Intergenic	Intergenic	122301	NM_001081080	Phf3	0.009119	0.436364	Intergenic	Intergenic	Intergenic	Other
chr1	30780320	30780660	5.53	5.32	5.71	-0.39	0.186	0.349	FALSE	No_SigChange	5.54	5.32	5.73	-0.41	0.207	0.303	FALSE	No_SigChange	5.58	5.71	5.43	0.29	0.303	0.367	FALSE	No_SigChange	5.37	5.32	5.43	-0.11	0.741	0.779	FALSE	No_SigChange	Intergenic	B3|SINE|B2	82766	NM_001081080	Phf3	0.017699	0.423529	B3	B2	SINE	SINE
chr1	30786740	30786960	3.48	0	4.41	-4.41	2.54e-07	6.04e-06	TRUE	SigIncrease	2.28	0	3.13	-3.13	0.00206	0.0104	FALSE	No_SigChange	3.84	4.41	2.91	1.5	0.00263	0.00658	TRUE	SigDecrease	2.09	0	2.91	-2.91	0.0071	0.0127	FALSE	No_SigChange	Intergenic	Intergenic	76406	NM_001081080	Phf3	0.022831	0.454545	Intergenic	Intergenic	Intergenic	Other
chr1	30787350	30787600	3.85	3.32	4.23	-0.91	0.0848	0.197	FALSE	No_SigChange	3.41	3.32	3.49	-0.17	0.793	0.848	FALSE	No_SigChange	4.71	4.23	5.08	-0.85	0.0234	0.0412	FALSE	No_SigChange	4.45	3.32	5.08	-1.76	0.000211	0.000544	TRUE	SigIncrease	Intergenic	Intergenic	75781	NM_001081080	Phf3	0.012048	0.472	Intergenic	Intergenic	Intergenic	Other
chr1	30800790	30801010	4.46	4.04	4.78	-0.74	0.0448	0.122	FALSE	No_SigChange	3.86	4.04	3.64	0.4	0.389	0.494	FALSE	No_SigChange	3.98	4.78	2	2.78	4.92e-07	4.09e-06	TRUE	SigDecrease	3.36	4.04	2	2.04	0.0017	0.00353	TRUE	SigDecrease	Intergenic	Intergenic	62356	NM_001081080	Phf3	0.004566	0.45	Intergenic	Intergenic	Intergenic	Other
chr1	30801870	30802170	4.77	4.09	5.24	-1.15	0.00248	0.0128	FALSE	No_SigChange	4.51	4.09	4.83	-0.75	0.124	0.205	FALSE	No_SigChange	4.89	5.24	4.43	0.81	0.0223	0.0397	FALSE	No_SigChange	4.27	4.09	4.43	-0.34	0.489	0.545	FALSE	No_SigChange	TTS	TTS (NM_001081080)	61236	NM_001081080	Phf3	0.020067	0.463333	TTS	TTS	TTS	Other
chr1	30804780	30805400	6.79	6.29	7.17	-0.88	0.000272	0.00213	TRUE	SigIncrease	5.69	6.28	4.67	1.61	5.17e-06	9.32e-05	TRUE	SigDecrease	6.69	7.16	5.96	1.2	9.18e-06	5.23e-05	TRUE	SigDecrease	6.13	6.28	5.96	0.32	0.247	0.3	FALSE	No_SigChange	exon	exon (NM_001081080, exon 15 of 15)	58166	NM_001081080	Phf3	0.021002	0.495161	exon	exon	exon	Other
chr1	30805660	30806020	4.98	4.34	5.42	-1.08	0.00146	0.00835	TRUE	SigIncrease	3.73	4.34	2.64	1.69	0.00272	0.0128	FALSE	No_SigChange	4.86	5.42	3.95	1.46	6.94e-05	0.000299	TRUE	SigDecrease	4.16	4.34	3.95	0.38	0.374	0.432	FALSE	No_SigChange	exon	exon (NM_001081080, exon 15 of 15)	57416	NM_001081080	Phf3	0.02507	0.488889	exon	exon	exon	Other
chr1	30847840	30847990	4.63	4	5.07	-1.07	0.0183	0.0618	FALSE	No_SigChange	3.23	4	1.46	2.54	0.000587	0.00399	TRUE	SigDecrease	4.8	5.06	4.47	0.59	0.132	0.18	FALSE	No_SigChange	4.26	4	4.47	-0.48	0.3	0.356	FALSE	No_SigChange	intron	intron (NM_001081080, intron 1 of 14)	15341	NM_001081080	Phf3	0	0.393333	intron	intron	intron	Other
chr1	30872830	30875100	10.06	9.98	10.14	-0.16	0.371	0.559	FALSE	No_SigChange	9.91	9.98	9.84	0.15	0.545	0.64	FALSE	No_SigChange	10.01	10.14	9.87	0.27	0.281	0.343	FALSE	No_SigChange	9.93	9.98	9.87	0.11	0.636	0.684	FALSE	No_SigChange	Intergenic	CpG	-10709	NM_001081080	Phf3	0.077567	0.581938	CpG	CpG	CpG	Other
chr1	30875920	30876700	5.07	5.02	5.11	-0.09	0.795	0.886	FALSE	No_SigChange	5.81	5.02	6.31	-1.29	4.99e-05	0.000579	TRUE	SigIncrease	6.29	5.11	6.93	-1.82	4.3e-10	8.39e-09	TRUE	SigIncrease	6.27	5.02	6.93	-1.91	2.19e-09	1.66e-08	TRUE	SigIncrease	Intergenic	Intergenic	-13054	NM_001081080	Phf3	0.005135	0.482051	Intergenic	Intergenic	Intergenic	Other
chr1	30883960	30884300	4.32	4.21	4.43	-0.22	0.63	0.776	FALSE	No_SigChange	4.47	4.21	4.69	-0.48	0.24	0.339	FALSE	No_SigChange	5.06	4.42	5.5	-1.08	0.0048	0.0109	FALSE	No_SigChange	4.99	4.21	5.5	-1.29	0.000373	0.000908	TRUE	SigIncrease	Intergenic	Lx|LINE|L1	-20874	NM_001081080	Phf3	0.00295	0.491176	Lx	L1	LINE	LINE
chr1	30908780	30909180	6.01	6.08	5.94	0.15	0.562	0.725	FALSE	No_SigChange	6.03	6.08	5.98	0.1	0.723	0.791	FALSE	No_SigChange	6.16	5.93	6.36	-0.43	0.114	0.158	FALSE	No_SigChange	6.23	6.08	6.36	-0.28	0.334	0.391	FALSE	No_SigChange	Intergenic	LTR40c|LTR|ERVL	40730	NR_002688	Gm13363	0.012531	0.435	LTR40c	ERVL	LTR	LTR
chr1	30930890	30931060	4.6	4.04	5	-0.96	0.00838	0.0335	FALSE	No_SigChange	4.09	4.04	4.13	-0.09	0.85	0.891	FALSE	No_SigChange	4.52	5	3.81	1.19	0.00406	0.00947	TRUE	SigDecrease	3.93	4.04	3.81	0.24	0.645	0.692	FALSE	No_SigChange	Intergenic	LTR33C|LTR|ERVL	18735	NR_002688	Gm13363	0	0.458824	LTR33C	ERVL	LTR	LTR
chr1	30937610	30938270	5.82	5.55	6.04	-0.49	0.132	0.273	FALSE	No_SigChange	5.51	5.55	5.47	0.09	0.796	0.849	FALSE	No_SigChange	6.31	6.04	6.54	-0.5	0.104	0.146	FALSE	No_SigChange	6.13	5.55	6.54	-0.99	0.00284	0.00558	TRUE	SigIncrease	Intergenic	ID_B1|SINE|B4	11770	NR_002688	Gm13363	0.016692	0.480303	ID_B1	B4	SINE	SINE
chr1	30940630	30941010	5.82	5.45	6.12	-0.67	0.0277	0.0847	FALSE	No_SigChange	5.43	5.45	5.41	0.04	0.914	0.94	FALSE	No_SigChange	5.96	6.12	5.79	0.32	0.241	0.301	FALSE	No_SigChange	5.63	5.45	5.79	-0.34	0.277	0.332	FALSE	No_SigChange	TTS	TTS (NR_002688)	8890	NR_002688	Gm13363	0.007916	0.447368	TTS	TTS	TTS	Other
chr1	30948460	30950540	10.22	10.22	10.23	-0.01	0.94	0.969	FALSE	No_SigChange	10.13	10.21	10.04	0.17	0.452	0.554	FALSE	No_SigChange	10.08	10.23	9.91	0.31	0.197	0.252	FALSE	No_SigChange	10.07	10.21	9.91	0.3	0.17	0.215	FALSE	No_SigChange	intron	CpG	210	NR_002688	Gm13363	0.085618	0.589904	CpG	CpG	CpG	Other
chr1	31038300	31038660	5.03	4.37	5.48	-1.11	0.00179	0.00982	TRUE	SigIncrease	4.85	4.37	5.21	-0.84	0.0249	0.0635	FALSE	No_SigChange	6.29	5.48	6.81	-1.33	2.33e-06	1.6e-05	TRUE	SigIncrease	6.05	4.37	6.81	-2.43	4.35e-15	1.18e-13	TRUE	SigIncrease	Intergenic	RLTR17|LTR|ERVK	-88725	NM_011200	Ptp4a1	0.016713	0.469444	RLTR17	ERVK	LTR	LTR
chr1	31096070	31096590	5.48	5.42	5.55	-0.13	0.676	0.808	FALSE	No_SigChange	5.41	5.42	5.41	0.01	0.984	0.989	FALSE	No_SigChange	5.82	5.54	6.05	-0.51	0.0769	0.113	FALSE	No_SigChange	5.77	5.42	6.05	-0.64	0.0401	0.0592	FALSE	No_SigChange	Intergenic	Intergenic	-80105	NM_153601	Lgsn	0.007707	0.455769	Intergenic	Intergenic	Intergenic	Other
chr1	31103300	31103740	5.22	4.94	5.45	-0.51	0.0949	0.215	FALSE	No_SigChange	4.74	4.94	4.51	0.43	0.277	0.38	FALSE	No_SigChange	5.2	5.45	4.89	0.55	0.0624	0.0948	FALSE	No_SigChange	4.92	4.94	4.89	0.05	0.894	0.912	FALSE	No_SigChange	Intergenic	RLTR9A3B|LTR|ERVK	-72915	NM_153601	Lgsn	0.009112	0.427273	RLTR9A3B	ERVK	LTR	LTR
chr1	31153960	31154220	5.25	5.37	5.12	0.25	0.461	0.641	FALSE	No_SigChange	5.57	5.36	5.74	-0.38	0.252	0.353	FALSE	No_SigChange	5.09	5.12	5.05	0.06	0.857	0.883	FALSE	No_SigChange	5.22	5.36	5.05	0.31	0.33	0.387	FALSE	No_SigChange	intron	intron (NR_033445, intron 2 of 2)	-22345	NM_153601	Lgsn	0.011583	0.411538	intron	intron	intron	Other
chr1	31222520	31222830	5.28	4.54	5.76	-1.22	0.000976	0.006	TRUE	SigIncrease	5	4.54	5.36	-0.82	0.041	0.0908	FALSE	No_SigChange	6	5.76	6.2	-0.44	0.134	0.182	FALSE	No_SigChange	5.6	4.54	6.2	-1.67	1.18e-05	4.02e-05	TRUE	SigIncrease	promoter-TSS	promoter-TSS (NM_029062)	-19	NR_033445	4931428L18Rik	0.029126	0.525806	promoter-TSS	promoter-TSS	promoter-TSS	Other
chr1	31233760	31234150	5.79	5.36	6.12	-0.76	0.0106	0.0403	FALSE	No_SigChange	5.51	5.36	5.65	-0.29	0.413	0.517	FALSE	No_SigChange	6.02	6.12	5.92	0.19	0.513	0.575	FALSE	No_SigChange	5.67	5.36	5.92	-0.57	0.0838	0.114	FALSE	No_SigChange	Intergenic	Intergenic	11116	NM_029062	Pih1d3	0.002571	0.446154	Intergenic	Intergenic	Intergenic	Other
chr1	31615840	31616570	5.76	4.98	6.27	-1.29	6.21e-06	9.17e-05	TRUE	SigIncrease	5.15	4.98	5.31	-0.34	0.323	0.427	FALSE	No_SigChange	6.34	6.27	6.41	-0.14	0.61	0.666	FALSE	No_SigChange	5.86	4.97	6.41	-1.43	1.28e-05	4.32e-05	TRUE	SigIncrease	Intergenic	Intergenic	351358	NR_015347	Gm4850	0.020576	0.512329	Intergenic	Intergenic	Intergenic	Other
chr1	31678510	31679070	6.25	6.08	6.4	-0.32	0.132	0.273	FALSE	No_SigChange	6.15	6.08	6.22	-0.15	0.569	0.661	FALSE	No_SigChange	6.56	6.4	6.7	-0.3	0.297	0.361	FALSE	No_SigChange	6.42	6.07	6.7	-0.63	0.0398	0.0589	FALSE	No_SigChange	Intergenic	RLTR9E|LTR|ERVK	413943	NR_015347	Gm4850	0.001789	0.478571	RLTR9E	ERVK	LTR	LTR
chr1	31778020	31778630	4.97	5.49	4.13	1.36	0.000889	0.00556	TRUE	SigDecrease	6.29	5.49	6.8	-1.31	3.19e-06	6.27e-05	TRUE	SigIncrease	6.13	4.13	6.94	-2.81	6.57e-07	5.26e-06	TRUE	SigIncrease	6.39	5.49	6.94	-1.45	3.27e-07	1.55e-06	TRUE	SigIncrease	Intergenic	RLTR23|LTR|ERV1	-394481	NM_133235	Khdrbs2	0	0.45082	RLTR23	ERV1	LTR	LTR
chr1	32074000	32074310	1.86	2.17	1.46	0.71	0.483	0.66	FALSE	No_SigChange	2.17	2.17	2.17	0	0.999	0.999	FALSE	No_SigChange	1.7	1.46	1.91	-0.45	0.645	0.698	FALSE	No_SigChange	2.04	2.17	1.91	0.26	0.777	0.81	FALSE	No_SigChange	Intergenic	L1Md_Gf|LINE|L1	-98651	NM_133235	Khdrbs2	0.048544	0.632258	L1Md_Gf	L1	LINE	LINE
chr1	32172160	32173210	9.25	9.06	9.41	-0.35	0.082	0.193	FALSE	No_SigChange	9.08	9.06	9.1	-0.04	0.879	0.914	FALSE	No_SigChange	9.17	9.41	8.88	0.53	0.0329	0.0551	FALSE	No_SigChange	8.97	9.06	8.88	0.19	0.424	0.482	FALSE	No_SigChange	promoter-TSS	promoter-TSS (NM_133235)	-121	NM_133235	Khdrbs2	0.055291	0.602857	promoter-TSS	promoter-TSS	promoter-TSS	Other
chr1	32221120	32221360	5.31	5.7	4.77	0.93	0.00211	0.0112	FALSE	No_SigChange	5.53	5.7	5.33	0.37	0.245	0.345	FALSE	No_SigChange	4.55	4.77	4.3	0.46	0.229	0.288	FALSE	No_SigChange	5.16	5.7	4.3	1.4	0.000141	0.000378	TRUE	SigDecrease	intron	L1_Mus3|LINE|L1	48434	NM_133235	Khdrbs2	0.029289	0.6	L1_Mus3	L1	LINE	LINE
chr1	32231450	32231650	4.89	4.58	5.14	-0.55	0.105	0.232	FALSE	No_SigChange	4.47	4.58	4.36	0.23	0.568	0.661	FALSE	No_SigChange	4.86	5.14	4.52	0.61	0.0712	0.106	FALSE	No_SigChange	4.55	4.58	4.52	0.06	0.876	0.896	FALSE	No_SigChange	intron	ORR1B1-int|LTR|ERVL-MaLR	58744	NM_133235	Khdrbs2	0.015075	0.54	ORR1B1-int	ERVL-MaLR	LTR	LTR
chr1	32265790	32265940	3.61	4	3.09	0.91	0.0643	0.161	FALSE	No_SigChange	3.7	4	3.32	0.68	0.165	0.255	FALSE	No_SigChange	2.81	3.09	2.46	0.63	0.339	0.404	FALSE	No_SigChange	3.42	4	2.46	1.54	0.00662	0.0119	FALSE	No_SigChange	intron	L1Md_Gf|LINE|L1	93059	NM_133235	Khdrbs2	0.033557	0.593333	L1Md_Gf	L1	LINE	LINE
chr1	32269960	32270710	5.99	5.63	6.27	-0.64	0.0251	0.0786	FALSE	No_SigChange	6.05	5.63	6.38	-0.76	0.0121	0.0379	FALSE	No_SigChange	6.47	6.27	6.64	-0.37	0.205	0.262	FALSE	No_SigChange	6.22	5.63	6.64	-1.01	0.0008	0.0018	TRUE	SigIncrease	intron	RMER17B|LTR|ERVK	97529	NM_133235	Khdrbs2	0.009346	0.565333	RMER17B	ERVK	LTR	LTR
chr1	32700190	32700370	4.67	4.58	4.74	-0.16	0.645	0.787	FALSE	No_SigChange	4.82	4.58	5.02	-0.44	0.217	0.315	FALSE	No_SigChange	4.89	4.74	5.03	-0.29	0.369	0.435	FALSE	No_SigChange	4.83	4.58	5.03	-0.45	0.209	0.258	FALSE	No_SigChange	Intergenic	B3|SINE|B2	-152987	NM_001164286	Gm5415	0.005587	0.411111	B3	B2	SINE	SINE
chr1	32964990	32965380	5.21	4.87	5.48	-0.61	0.0683	0.168	FALSE	No_SigChange	5.31	4.87	5.64	-0.77	0.0141	0.0422	FALSE	No_SigChange	5.83	5.48	6.11	-0.63	0.0377	0.0617	FALSE	No_SigChange	5.62	4.87	6.11	-1.24	1.54e-05	5.11e-05	TRUE	SigIncrease	Intergenic	Intergenic	-417892	NM_001164286	Gm5415	0.007712	0.423077	Intergenic	Intergenic	Intergenic	Other
chr1	33106210	33106740	6.53	6.42	6.63	-0.22	0.353	0.541	FALSE	No_SigChange	6.17	6.42	5.88	0.53	0.103	0.179	FALSE	No_SigChange	6.4	6.63	6.12	0.51	0.0679	0.102	FALSE	No_SigChange	6.28	6.42	6.12	0.29	0.31	0.366	FALSE	No_SigChange	Intergenic	RLTR16B_MM|LTR|ERVK	-559182	NM_001164286	Gm5415	0.009452	0.437736	RLTR16B_MM	ERVK	LTR	LTR
chr1	33244660	33245270	5.38	2.64	6.27	-3.63	2.03e-06	3.55e-05	TRUE	SigIncrease	3.88	2.64	4.54	-1.9	0.00216	0.0108	FALSE	No_SigChange	5.96	6.27	5.57	0.7	0.0145	0.0276	FALSE	No_SigChange	4.75	2.64	5.57	-2.93	8.5e-09	5.68e-08	TRUE	SigIncrease	Intergenic	RLTR26D_MM|LTR|ERVK	424793	NM_008922	Prim2	0.019704	0.511475	RLTR26D_MM	ERVK	LTR	LTR
chr1	33256870	33257310	5.61	5.99	5.09	0.91	0.0028	0.0141	FALSE	No_SigChange	6.08	5.99	6.15	-0.16	0.544	0.639	FALSE	No_SigChange	5.28	5.09	5.45	-0.37	0.321	0.385	FALSE	No_SigChange	5.75	5.99	5.45	0.54	0.0944	0.127	FALSE	No_SigChange	Intergenic	Intergenic	412668	NM_008922	Prim2	0.025057	0.529545	Intergenic	Intergenic	Intergenic	Other
chr1	33271360	33272160	7.62	7.49	7.74	-0.25	0.204	0.373	FALSE	No_SigChange	7.2	7.49	6.85	0.63	0.0159	0.0459	FALSE	No_SigChange	7.54	7.74	7.31	0.43	0.089	0.128	FALSE	No_SigChange	7.4	7.49	7.31	0.17	0.464	0.521	FALSE	No_SigChange	Intergenic	MTE2a|LTR|ERVL-MaLR	397998	NM_008922	Prim2	0.015019	0.44125	MTE2a	ERVL-MaLR	LTR	LTR
chr1	33494970	33495220	4.85	5.12	4.51	0.61	0.091	0.208	FALSE	No_SigChange	4.37	5.12	2.75	2.36	1.41e-05	0.000211	TRUE	SigDecrease	3.77	4.51	2.17	2.34	6.7e-05	0.00029	TRUE	SigDecrease	4.29	5.12	2.17	2.95	1.61e-08	1.01e-07	TRUE	SigDecrease	intron	intron (NM_008922, intron 10 of 13)	174663	NM_008922	Prim2	0.004016	0.376	intron	intron	intron	Other
chr1	33499930	33500320	5.44	4.58	5.97	-1.39	9.34e-06	0.000129	TRUE	SigIncrease	4.43	4.58	4.25	0.34	0.46	0.562	FALSE	No_SigChange	5.26	5.97	3.83	2.14	4.67e-08	5.21e-07	TRUE	SigDecrease	4.26	4.58	3.83	0.75	0.146	0.187	FALSE	No_SigChange	intron	intron (NM_008922, intron 10 of 13)	169633	NM_008922	Prim2	0.025707	0.484615	intron	intron	intron	Other
chr1	33565750	33566170	6.69	6.53	6.84	-0.31	0.211	0.382	FALSE	No_SigChange	6.28	6.53	5.99	0.54	0.0547	0.112	FALSE	No_SigChange	6.59	6.84	6.29	0.55	0.0202	0.0365	FALSE	No_SigChange	6.41	6.53	6.29	0.24	0.368	0.425	FALSE	No_SigChange	intron	intron (NM_008922, intron 7 of 13)	103798	NM_008922	Prim2	0.009547	0.47619	intron	intron	intron	Other
chr1	33584140	33584620	5.85	5.79	5.92	-0.13	0.619	0.768	FALSE	No_SigChange	5.96	5.79	6.11	-0.32	0.362	0.466	FALSE	No_SigChange	5.72	5.92	5.49	0.43	0.103	0.145	FALSE	No_SigChange	5.65	5.79	5.49	0.29	0.322	0.379	FALSE	No_SigChange	intron	intron (NM_008922, intron 7 of 13)	85378	NM_008922	Prim2	0.010438	0.43125	intron	intron	intron	Other
chr1	33600460	33600630	3.15	3.36	2.91	0.45	0.455	0.635	FALSE	No_SigChange	3.25	3.36	3.13	0.23	0.702	0.774	FALSE	No_SigChange	3.69	2.9	4.19	-1.28	0.0165	0.0308	FALSE	No_SigChange	3.83	3.36	4.19	-0.83	0.0849	0.116	FALSE	No_SigChange	intron	CT-rich|Low_complexity|Low_complexity	69213	NM_008922	Prim2	0.005917	0.641176	CT-rich	Low_complexity	Low_complexity	Other
chr1	33621660	33622320	7.88	7.49	8.18	-0.69	0.00306	0.0151	FALSE	No_SigChange	7.18	7.49	6.79	0.7	0.00359	0.0157	FALSE	No_SigChange	7.97	8.18	7.72	0.46	0.0848	0.123	FALSE	No_SigChange	7.61	7.49	7.72	-0.23	0.343	0.401	FALSE	No_SigChange	intron	MLTR31FA_MM|LTR|ERVK	47768	NM_008922	Prim2	0.016692	0.442424	MLTR31FA_MM	ERVK	LTR	LTR
chr1	33636030	33637080	8.17	8.15	8.2	-0.05	0.804	0.892	FALSE	No_SigChange	7.94	8.15	7.71	0.44	0.0874	0.158	FALSE	No_SigChange	7.7	8.19	6.95	1.24	4.01e-06	2.55e-05	TRUE	SigDecrease	7.67	8.14	6.95	1.19	4.71e-06	1.75e-05	TRUE	SigDecrease	intron	B3|SINE|B2	33203	NM_008922	Prim2	0.018112	0.509524	B3	B2	SINE	SINE
chr1	33637740	33638270	7.03	7	7.07	-0.07	0.81	0.895	FALSE	No_SigChange	6.88	7	6.76	0.24	0.429	0.532	FALSE	No_SigChange	6.82	7.06	6.53	0.53	0.033	0.0552	FALSE	No_SigChange	6.78	6.99	6.53	0.46	0.121	0.158	FALSE	No_SigChange	intron	intron (NM_008922, intron 5 of 13)	31753	NM_008922	Prim2	0.037807	0.562264	intron	intron	intron	Other
chr1	33669420	33670770	9.05	9.14	8.95	0.2	0.352	0.54	FALSE	No_SigChange	8.8	9.14	8.36	0.78	0.00301	0.0138	FALSE	No_SigChange	8.54	8.94	7.97	0.97	0.000131	0.000516	TRUE	SigDecrease	8.67	9.14	7.97	1.17	3.18e-06	1.23e-05	TRUE	SigDecrease	promoter-TSS	promoter-TSS (NM_008922)	271	NR_033199	1700001G17Rik	0.061527	0.562222	promoter-TSS	promoter-TSS	promoter-TSS	Other
chr1	33672640	33672900	6	6.09	5.91	0.18	0.533	0.702	FALSE	No_SigChange	5.79	6.09	5.43	0.66	0.0249	0.0635	FALSE	No_SigChange	5.58	5.9	5.15	0.76	0.0151	0.0284	FALSE	No_SigChange	5.69	6.09	5.15	0.94	0.00232	0.00465	TRUE	SigDecrease	Intergenic	B3|SINE|B2	2946	NR_033199	1700001G17Rik	0.011583	0.492308	B3	B2	SINE	SINE
chr1	33690000	33690340	6.22	6.42	6	0.42	0.115	0.248	FALSE	No_SigChange	5.89	6.42	5.07	1.35	1.76e-06	3.88e-05	TRUE	SigDecrease	5.39	6	4.3	1.69	1.8e-06	1.27e-05	TRUE	SigDecrease	5.72	6.42	4.3	2.11	2.62e-10	2.44e-09	TRUE	SigDecrease	Intergenic	BGLII_B|LTR|ERVK	20346	NR_033199	1700001G17Rik	0.0059	0.476471	BGLII_B	ERVK	LTR	LTR
chr1	33714730	33715300	6.75	6.81	6.7	0.11	0.639	0.782	FALSE	No_SigChange	6.62	6.81	6.42	0.39	0.12	0.2	FALSE	No_SigChange	6.28	6.69	5.71	0.99	0.000428	0.00141	TRUE	SigDecrease	6.36	6.8	5.71	1.1	7.43e-05	0.000212	TRUE	SigDecrease	Intergenic	Intergenic	-4881	NM_008999	Rab23	0.019332	0.452632	Intergenic	Intergenic	Intergenic	Other
chr1	33719590	33720640	9.22	9.22	9.22	0	0.995	0.999	FALSE	No_SigChange	8.97	9.22	8.67	0.56	0.0261	0.0657	FALSE	No_SigChange	9.04	9.22	8.83	0.39	0.148	0.198	FALSE	No_SigChange	9.04	9.22	8.83	0.39	0.122	0.16	FALSE	No_SigChange	promoter-TSS	promoter-TSS (NM_001159729)	219	NM_008999	Rab23	0.094376	0.614286	promoter-TSS	promoter-TSS	promoter-TSS	Other
chr1	33739160	33739740	6.7	6.75	6.65	0.09	0.661	0.797	FALSE	No_SigChange	6.43	6.75	6.02	0.72	0.00653	0.0243	FALSE	No_SigChange	6.22	6.65	5.6	1.05	0.000884	0.00262	TRUE	SigDecrease	6.28	6.75	5.6	1.15	0.000463	0.0011	TRUE	SigDecrease	3'UTR	3' UTR (NM_008999, exon 8 of 8)	18300	NM_145392	Bag2	0.025907	0.468966	3'UTR	3'UTR	3'UTR	Other
chr1	33741710	33742180	6.73	6.61	6.85	-0.23	0.408	0.593	FALSE	No_SigChange	6.21	6.61	5.67	0.94	0.0111	0.0358	FALSE	No_SigChange	6.21	6.84	5.08	1.77	9.44e-09	1.27e-07	TRUE	SigDecrease	6.04	6.61	5.08	1.53	3.98e-06	1.5e-05	TRUE	SigDecrease	3'UTR	3' UTR (NM_008999, exon 8 of 8)	15805	NM_145392	Bag2	0.017058	0.517021	3'UTR	3'UTR	3'UTR	Other
chr1	33742680	33743270	7.25	7.19	7.31	-0.11	0.641	0.784	FALSE	No_SigChange	6.92	7.19	6.59	0.6	0.0184	0.0512	FALSE	No_SigChange	6.91	7.31	6.36	0.94	0.000245	0.00088	TRUE	SigDecrease	6.84	7.19	6.36	0.83	0.000633	0.00146	TRUE	SigDecrease	TTS	TTS (NM_008999)	14775	NM_145392	Bag2	0.022071	0.459322	TTS	TTS	TTS	Other
chr1	33748970	33749340	5.65	5.47	5.82	-0.35	0.236	0.412	FALSE	No_SigChange	5.33	5.47	5.17	0.3	0.411	0.515	FALSE	No_SigChange	5.63	5.82	5.41	0.41	0.186	0.241	FALSE	No_SigChange	5.44	5.47	5.41	0.06	0.862	0.885	FALSE	No_SigChange	intron	intron (NM_145392, intron 1 of 2)	8595	NM_145392	Bag2	0.03252	0.543243	intron	intron	intron	Other
chr1	33756180	33756800	6.27	5.61	6.72	-1.1	2.25e-06	3.88e-05	TRUE	SigIncrease	5.09	5.61	4.25	1.37	0.0577	0.116	FALSE	No_SigChange	6	6.72	4.52	2.19	9.18e-13	3.65e-11	TRUE	SigDecrease	5.17	5.61	4.52	1.09	0.00206	0.00418	TRUE	SigDecrease	intron	intron (NM_145392, intron 1 of 2)	1260	NM_145392	Bag2	0.019386	0.435484	intron	intron	intron	Other
chr1	33757190	33758190	8.31	8.49	8.1	0.39	0.0811	0.191	FALSE	No_SigChange	8.25	8.49	7.95	0.54	0.0522	0.108	FALSE	No_SigChange	7.7	8.1	7.16	0.94	0.000134	0.000526	TRUE	SigDecrease	7.97	8.49	7.16	1.34	6.69e-07	2.97e-06	TRUE	SigDecrease	promoter-TSS	promoter-TSS (NM_145392)	60	NM_145392	Bag2	0.075075	0.641	promoter-TSS	promoter-TSS	promoter-TSS	Other
chr1	33813760	33815390	9.5	9.37	9.63	-0.26	0.206	0.375	FALSE	No_SigChange	9.14	9.37	8.87	0.5	0.0358	0.0824	FALSE	No_SigChange	9.37	9.62	9.05	0.58	0.0414	0.0669	FALSE	No_SigChange	9.22	9.37	9.05	0.32	0.222	0.273	FALSE	No_SigChange	promoter-TSS	promoter-TSS (NM_133817)	-148	NM_133817	Zfp451	0.057704	0.576074	promoter-TSS	promoter-TSS	promoter-TSS	Other
chr1	33883760	33883990	3	1.32	3.75	-2.43	0.00458	0.0208	FALSE	No_SigChange	3.44	1.32	4.27	-2.95	0.000454	0.00328	TRUE	SigIncrease	4.53	3.75	5.03	-1.28	0.0895	0.129	FALSE	No_SigChange	4.14	1.32	5.03	-3.71	9.44e-10	7.83e-09	TRUE	SigIncrease	intron	B2_Mm2|SINE|B2	23746	NM_177235	Bend6	0.021834	0.43913	B2_Mm2	B2	SINE	SINE
chr1	33892540	33893110	6.1	5.86	6.31	-0.45	0.0975	0.219	FALSE	No_SigChange	5.79	5.86	5.73	0.13	0.706	0.777	FALSE	No_SigChange	6.42	6.31	6.52	-0.21	0.467	0.531	FALSE	No_SigChange	6.22	5.86	6.52	-0.66	0.0181	0.0291	FALSE	No_SigChange	intron	intron (NM_177235, intron 1 of 6)	14796	NM_177235	Bend6	0.024605	0.424561	intron	intron	intron	Other
chr1	33903270	33904070	7.17	7.18	7.16	0.02	0.936	0.967	FALSE	No_SigChange	7.18	7.18	7.18	0	0.996	0.999	FALSE	No_SigChange	7.16	7.16	7.15	0.01	0.972	0.978	FALSE	No_SigChange	7.16	7.18	7.15	0.03	0.917	0.931	FALSE	No_SigChange	intron	intron (NM_177235, intron 1 of 6)	3951	NM_177235	Bend6	0.022528	0.46875	intron	intron	intron	Other
chr1	33907000	33908900	10.09	10.03	10.14	-0.11	0.596	0.75	FALSE	No_SigChange	9.78	10.03	9.48	0.55	0.0405	0.0901	FALSE	No_SigChange	9.79	10.14	9.34	0.79	0.00234	0.00596	TRUE	SigDecrease	9.73	10.03	9.34	0.68	0.00584	0.0106	FALSE	No_SigChange	promoter-TSS	promoter-TSS (NM_177235)	-329	NM_177235	Bend6	0.091101	0.641053	promoter-TSS	promoter-TSS	promoter-TSS	Other
chr1	33925440	33925750	4.99	5.08	4.91	0.17	0.61	0.761	FALSE	No_SigChange	5.45	5.08	5.74	-0.67	0.0469	0.1	FALSE	No_SigChange	4.55	4.9	4.09	0.82	0.0327	0.0548	FALSE	No_SigChange	4.66	5.07	4.09	0.99	0.0099	0.017	FALSE	No_SigChange	Intergenic	intron (NM_001276764, intron 2 of 102)	-17974	NM_177235	Bend6	0.009709	0.474194	intron	intron	intron	Other
chr1	33943930	33944540	6.82	6.76	6.87	-0.11	0.641	0.783	FALSE	No_SigChange	6.56	6.76	6.32	0.44	0.126	0.208	FALSE	No_SigChange	6.43	6.87	5.8	1.07	3.11e-05	0.00015	TRUE	SigDecrease	6.36	6.76	5.8	0.96	0.00039	0.000945	TRUE	SigDecrease	Intergenic	MTD|LTR|ERVL-MaLR	-36614	NM_177235	Bend6	0.004926	0.439344	MTD	ERVL-MaLR	LTR	LTR
chr1	33944900	33945440	6.72	6.31	7.03	-0.72	0.00638	0.0271	FALSE	No_SigChange	6.35	6.31	6.4	-0.08	0.776	0.834	FALSE	No_SigChange	6.86	7.03	6.66	0.37	0.14	0.189	FALSE	No_SigChange	6.5	6.31	6.66	-0.35	0.171	0.216	FALSE	No_SigChange	Intergenic	intron (NM_001276764, intron 2 of 102)	-37549	NM_177235	Bend6	0.025974	0.538889	intron	intron	intron	Other
chr1	33964580	33965000	6.15	6.07	6.23	-0.16	0.46	0.64	FALSE	No_SigChange	5.87	6.07	5.64	0.43	0.146	0.232	FALSE	No_SigChange	5.76	6.23	5.05	1.18	1.96e-05	0.000101	TRUE	SigDecrease	5.65	6.07	5.05	1.01	0.000434	0.00104	TRUE	SigDecrease	Intergenic	intron (NM_001276764, intron 2 of 102)	-47035	NM_134448	Dst	0.016706	0.471429	intron	intron	intron	Other
chr1	33966370	33966820	5.76	5.61	5.89	-0.28	0.282	0.466	FALSE	No_SigChange	5.59	5.61	5.56	0.05	0.867	0.904	FALSE	No_SigChange	5.72	5.89	5.52	0.37	0.231	0.29	FALSE	No_SigChange	5.57	5.61	5.52	0.09	0.791	0.823	FALSE	No_SigChange	Intergenic	intron (NM_001276764, intron 2 of 102)	-45230	NM_134448	Dst	0.020045	0.471111	intron	intron	intron	Other
chr1	33989830	33990250	5.97	6.01	5.93	0.08	0.753	0.859	FALSE	No_SigChange	5.97	6.01	5.94	0.07	0.828	0.875	FALSE	No_SigChange	5.48	5.93	4.82	1.11	0.000188	0.000701	TRUE	SigDecrease	5.53	6.01	4.82	1.19	0.000112	0.000308	TRUE	SigDecrease	Intergenic	intron (NM_001276764, intron 3 of 102)	-21785	NM_134448	Dst	0.019093	0.545238	intron	intron	intron	Other
chr1	34002630	34002960	4.46	4.04	4.78	-0.74	0.0676	0.167	FALSE	No_SigChange	4.18	4.04	4.3	-0.26	0.547	0.642	FALSE	No_SigChange	4.57	4.78	4.32	0.46	0.232	0.292	FALSE	No_SigChange	4.19	4.04	4.32	-0.28	0.505	0.561	FALSE	No_SigChange	Intergenic	B2_Mm1t|SINE|B2	-9030	NM_134448	Dst	0.012158	0.409091	B2_Mm1t	B2	SINE	SINE
chr1	34005460	34007830	9.15	9.3	8.98	0.32	0.142	0.288	FALSE	No_SigChange	8.79	9.3	7.99	1.31	1.96e-05	0.000276	TRUE	SigDecrease	8.31	8.98	7.04	1.94	8e-15	5.61e-13	TRUE	SigDecrease	8.57	9.3	7.04	2.26	2.59e-20	2.19e-18	TRUE	SigDecrease	Intergenic	intron (NM_001276764, intron 4 of 102)	-5180	NM_134448	Dst	0.020262	0.496203	intron	intron	intron	Other
chr1	34011000	34012250	9.32	9.31	9.34	-0.03	0.88	0.936	FALSE	No_SigChange	9.11	9.31	8.89	0.42	0.109	0.187	FALSE	No_SigChange	9.08	9.34	8.77	0.57	0.014	0.0268	FALSE	No_SigChange	9.06	9.31	8.77	0.54	0.0171	0.0276	FALSE	No_SigChange	promoter-TSS	promoter-TSS (NM_133833)	-200	NM_134448	Dst	0.066453	0.6488	promoter-TSS	promoter-TSS	promoter-TSS	Other
chr1	34038590	34038830	4.86	4.79	4.93	-0.14	0.719	0.837	FALSE	No_SigChange	4.67	4.79	4.54	0.25	0.539	0.634	FALSE	No_SigChange	5.05	4.93	5.17	-0.24	0.504	0.566	FALSE	No_SigChange	4.99	4.79	5.17	-0.38	0.266	0.32	FALSE	No_SigChange	intron	MTD|LTR|ERVL-MaLR	26885	NM_133833	Dst	0.016736	0.55	MTD	ERVL-MaLR	LTR	LTR
chr1	34041170	34041510	6.04	5.97	6.1	-0.14	0.65	0.79	FALSE	No_SigChange	5.49	5.96	4.79	1.17	0.00434	0.0181	FALSE	No_SigChange	5.61	6.1	4.86	1.24	5.37e-05	0.000239	TRUE	SigDecrease	5.51	5.96	4.86	1.11	0.00128	0.00274	TRUE	SigDecrease	intron	intron (NM_134448, intron 1 of 97)	29515	NM_133833	Dst	0.0059	0.538235	intron	intron	intron	Other
chr1	34056630	34056890	4.56	3.25	5.24	-1.99	1e-05	0.000137	TRUE	SigIncrease	2.39	3.25	0	3.25	0.00123	0.00704	TRUE	SigDecrease	4.95	5.24	4.6	0.64	0.0888	0.128	FALSE	No_SigChange	4.08	3.25	4.6	-1.35	0.00423	0.00796	TRUE	SigIncrease	intron	intron (NM_134448, intron 1 of 97)	44935	NM_133833	Dst	0.042471	0.438462	intron	intron	intron	Other
chr1	34060960	34061420	6.74	6.77	6.72	0.05	0.832	0.908	FALSE	No_SigChange	6.63	6.77	6.48	0.28	0.323	0.427	FALSE	No_SigChange	6.49	6.72	6.22	0.5	0.0534	0.083	FALSE	No_SigChange	6.52	6.77	6.22	0.54	0.0344	0.0516	FALSE	No_SigChange	intron	intron (NM_134448, intron 1 of 97)	49365	NM_133833	Dst	0.010893	0.480435	intron	intron	intron	Other
chr1	34063900	34064250	5.87	5.52	6.16	-0.64	0.0127	0.0465	FALSE	No_SigChange	4.89	5.51	3.75	1.76	7.37e-06	0.000125	TRUE	SigDecrease	5.62	6.16	4.74	1.42	1.68e-05	8.8e-05	TRUE	SigDecrease	5.18	5.51	4.74	0.77	0.0353	0.0529	FALSE	No_SigChange	intron	intron (NM_134448, intron 1 of 97)	52250	NM_133833	Dst	0.008596	0.448571	intron	intron	intron	Other
chr1	34068140	34068800	7.16	7.05	7.27	-0.22	0.354	0.541	FALSE	No_SigChange	6.91	7.05	6.76	0.28	0.294	0.397	FALSE	No_SigChange	7.14	7.27	7	0.27	0.306	0.371	FALSE	No_SigChange	7.02	7.04	7	0.05	0.844	0.87	FALSE	No_SigChange	intron	ORR1E|LTR|ERVL-MaLR	56645	NM_133833	Dst	0.01214	0.492424	ORR1E	ERVL-MaLR	LTR	LTR
chr1	34073630	34075220	8.91	8.93	8.9	0.03	0.87	0.93	FALSE	No_SigChange	8.5	8.93	7.89	1.04	0.000131	0.00125	TRUE	SigDecrease	8.44	8.9	7.78	1.11	1.36e-05	7.35e-05	TRUE	SigDecrease	8.47	8.93	7.78	1.14	4.7e-06	1.75e-05	TRUE	SigDecrease	intron	intron (NM_134448, intron 1 of 97)	62600	NM_133833	Dst	0.015733	0.507547	intron	intron	intron	Other
chr1	34076940	34077820	7.77	7.86	7.68	0.18	0.37	0.557	FALSE	No_SigChange	7.34	7.86	6.52	1.34	3.23e-06	6.34e-05	TRUE	SigDecrease	7.21	7.68	6.49	1.19	4.22e-07	3.58e-06	TRUE	SigDecrease	7.33	7.86	6.49	1.37	1.55e-09	1.22e-08	TRUE	SigDecrease	intron	intron (NM_134448, intron 1 of 97)	65555	NM_133833	Dst	0.020478	0.489773	intron	intron	intron	Other
chr1	34093680	34093920	5.76	5.39	6.05	-0.66	0.0186	0.0625	FALSE	No_SigChange	5.11	5.39	4.75	0.64	0.0533	0.11	FALSE	No_SigChange	5.91	6.05	5.74	0.31	0.274	0.336	FALSE	No_SigChange	5.58	5.39	5.74	-0.35	0.222	0.273	FALSE	No_SigChange	intron	B3|SINE|B2	81975	NM_133833	Dst	0.012552	0.441667	B3	B2	SINE	SINE
chr1	34102840	34104880	9.04	9.14	8.94	0.2	0.239	0.416	FALSE	No_SigChange	8.68	9.14	8.01	1.12	1.05e-05	0.000166	TRUE	SigDecrease	8.5	8.93	7.87	1.06	8.74e-06	5.01e-05	TRUE	SigDecrease	8.64	9.14	7.87	1.26	1.32e-08	8.47e-08	TRUE	SigDecrease	intron	intron (NM_001276764, intron 5 of 102)	92035	NM_133833	Dst	0.007357	0.441667	intron	intron	intron	Other
chr1	34106890	34107550	7.84	7.85	7.84	0	0.982	0.991	FALSE	No_SigChange	7.65	7.85	7.43	0.42	0.127	0.209	FALSE	No_SigChange	7.53	7.84	7.13	0.71	0.00207	0.00538	TRUE	SigDecrease	7.53	7.84	7.13	0.71	0.0036	0.00689	TRUE	SigDecrease	intron	intron (NM_001276764, intron 5 of 102)	95395	NM_133833	Dst	0.018209	0.44697	intron	intron	intron	Other
chr1	34109700	34109950	4.3	4.32	4.29	0.04	0.925	0.961	FALSE	No_SigChange	4.86	4.32	5.26	-0.94	0.0204	0.055	FALSE	No_SigChange	4.36	4.28	4.43	-0.14	0.704	0.751	FALSE	No_SigChange	4.37	4.32	4.43	-0.11	0.794	0.825	FALSE	No_SigChange	intron	intron (NM_001276764, intron 5 of 102)	98000	NM_133833	Dst	0.008032	0.488	intron	intron	intron	Other
chr1	34116440	34116670	5.43	5.38	5.47	-0.08	0.775	0.874	FALSE	No_SigChange	4.66	5.38	3.13	2.25	3.83e-06	7.29e-05	TRUE	SigDecrease	4.87	5.47	3.83	1.63	0.0166	0.0308	FALSE	No_SigChange	4.81	5.38	3.83	1.55	0.000846	0.00189	TRUE	SigDecrease	intron	promoter-TSS (NR_105861)	104730	NM_133833	Dst	0.039301	0.495652	promoter-TSS	promoter-TSS	promoter-TSS	Other
chr1	34127640	34128160	6.45	6.46	6.44	0.02	0.921	0.959	FALSE	No_SigChange	6.58	6.46	6.69	-0.23	0.542	0.637	FALSE	No_SigChange	6.27	6.44	6.09	0.34	0.21	0.267	FALSE	No_SigChange	6.29	6.46	6.09	0.37	0.245	0.297	FALSE	No_SigChange	intron	MTD|LTR|ERVL-MaLR	116075	NM_133833	Dst	0.017341	0.517308	MTD	ERVL-MaLR	LTR	LTR
chr1	34139370	34140920	7.92	7.57	8.2	-0.63	0.0035	0.0168	FALSE	No_SigChange	7.43	7.57	7.27	0.29	0.26	0.361	FALSE	No_SigChange	7.92	8.19	7.59	0.61	0.0157	0.0295	FALSE	No_SigChange	7.58	7.57	7.59	-0.02	0.929	0.941	FALSE	No_SigChange	intron	intron (NM_001276764, intron 9 of 102)	128320	NM_133833	Dst	0.012912	0.466452	intron	intron	intron	Other
chr1	34148160	34148380	4.59	3.61	5.17	-1.56	5.34e-05	0.000555	TRUE	SigIncrease	2.95	3.61	1.7	1.91	0.00776	0.0275	FALSE	No_SigChange	4.78	5.17	4.25	0.92	0.0084	0.0174	FALSE	No_SigChange	3.96	3.61	4.25	-0.63	0.182	0.229	FALSE	No_SigChange	intron	RMER15|LTR|ERVL	136445	NM_133833	Dst	0.031963	0.540909	RMER15	ERVL	LTR	LTR
chr1	34164440	34165010	6.04	5.65	6.35	-0.7	0.00467	0.0211	FALSE	No_SigChange	5.33	5.65	4.91	0.74	0.0361	0.0828	FALSE	No_SigChange	6.1	6.35	5.79	0.56	0.0176	0.0325	FALSE	No_SigChange	5.72	5.65	5.79	-0.14	0.61	0.66	FALSE	No_SigChange	intron	intron (NM_001276764, intron 21 of 102)	152900	NM_133833	Dst	0.01406	0.412281	intron	intron	intron	Other
chr1	34177860	34178620	7.08	6.77	7.33	-0.56	0.049	0.131	FALSE	No_SigChange	6.03	6.77	4.43	2.35	0.0368	0.084	FALSE	No_SigChange	6.85	7.33	6.13	1.2	9.83e-06	5.55e-05	TRUE	SigDecrease	6.49	6.77	6.13	0.64	0.062	0.0873	FALSE	No_SigChange	intron	exon (NM_010081, exon 23 of 24)	166415	NM_133833	Dst	0.056653	0.577632	exon	exon	exon	Other
chr1	34189950	34190300	6.09	5.77	6.35	-0.57	0.0543	0.142	FALSE	No_SigChange	5.55	5.77	5.29	0.48	0.118	0.198	FALSE	No_SigChange	5.92	6.35	5.31	1.03	0.0539	0.0837	FALSE	No_SigChange	5.56	5.77	5.31	0.46	0.192	0.24	FALSE	No_SigChange	exon	exon (NM_134448, exon 36 of 98)	178300	NM_133833	Dst	0.020057	0.5	exon	exon	exon	Other
chr1	34218320	34218590	6.18	6.17	6.18	-0.01	0.97	0.985	FALSE	No_SigChange	5.86	6.17	5.47	0.71	0.00801	0.0282	FALSE	No_SigChange	5.9	6.18	5.55	0.64	0.0312	0.0526	FALSE	No_SigChange	5.89	6.17	5.55	0.63	0.0201	0.032	FALSE	No_SigChange	exon	exon (NM_133833, exon 48 of 93)	206630	NM_133833	Dst	0.01487	0.477778	exon	exon	exon	Other
chr1	34236270	34236720	7.47	7.79	7.05	0.74	0.00222	0.0117	FALSE	No_SigChange	7.4	7.79	6.86	0.93	0.00099	0.00597	TRUE	SigDecrease	6.53	7.05	5.72	1.33	7.27e-07	5.74e-06	TRUE	SigDecrease	7.1	7.79	5.72	2.07	8.89e-16	2.8e-14	TRUE	SigDecrease	intron	intron (NM_001276764, intron 60 of 102)	196704	NR_039562	Mir5103	0.062361	0.673333	intron	intron	intron	Other
chr1	34270860	34271160	5.17	4.69	5.54	-0.85	0.0149	0.0527	FALSE	No_SigChange	3.77	4.68	0.58	4.1	3.68e-08	1.65e-06	TRUE	SigDecrease	4.96	5.54	4	1.54	0.000539	0.00172	TRUE	SigDecrease	4.38	4.68	4	0.68	0.167	0.211	FALSE	No_SigChange	exon	exon (NM_133833, exon 71 of 93)	162189	NR_039562	Mir5103	0.040134	0.503333	exon	exon	exon	Other
chr1	34432330	34433490	7.9	7.8	8	-0.2	0.356	0.544	FALSE	No_SigChange	7.65	7.79	7.5	0.3	0.299	0.403	FALSE	No_SigChange	7.78	7.99	7.53	0.46	0.056	0.0865	FALSE	No_SigChange	7.67	7.79	7.53	0.27	0.293	0.348	FALSE	No_SigChange	TTS	TTS (NR_039562)	289	NR_039562	Mir5103	0.042278	0.526724	TTS	TTS	TTS	Other
chr1	34433970	34436220	9.05	9.25	8.82	0.43	0.0215	0.0698	FALSE	No_SigChange	8.99	9.25	8.67	0.57	0.0348	0.0808	FALSE	No_SigChange	8.5	8.82	8.1	0.72	0.00158	0.00428	TRUE	SigDecrease	8.78	9.25	8.1	1.15	7.19e-07	3.17e-06	TRUE	SigDecrease	Intergenic	Intergenic	-1896	NR_039562	Mir5103	0.027568	0.457333	Intergenic	Intergenic	Intergenic	Other
chr1	34439120	34440400	9.9	9.95	9.85	0.11	0.587	0.744	FALSE	No_SigChange	9.79	9.95	9.61	0.34	0.168	0.259	FALSE	No_SigChange	9.66	9.85	9.45	0.39	0.112	0.156	FALSE	No_SigChange	9.72	9.95	9.45	0.5	0.0229	0.036	FALSE	No_SigChange	promoter-TSS	promoter-TSS (NM_027159)	-69	NM_178601	Imp4	0.056294	0.560937	promoter-TSS	promoter-TSS	promoter-TSS	Other
chr1	34458430	34458770	5.52	5.79	5.19	0.6	0.026	0.0807	FALSE	No_SigChange	5.49	5.79	5.1	0.7	0.032	0.0759	FALSE	No_SigChange	4.9	5.19	4.54	0.65	0.0566	0.0872	FALSE	No_SigChange	5.3	5.79	4.54	1.25	0.00019	0.000496	TRUE	SigDecrease	Intergenic	Intergenic	-1146	NM_011206	Ptpn18	0.020649	0.514706	Intergenic	Intergenic	Intergenic	Other
chr1	34459280	34460350	9.03	9.14	8.92	0.22	0.26	0.441	FALSE	No_SigChange	8.91	9.14	8.65	0.49	0.0948	0.168	FALSE	No_SigChange	8.72	8.92	8.48	0.44	0.0559	0.0863	FALSE	No_SigChange	8.85	9.14	8.48	0.66	0.00373	0.00712	TRUE	SigDecrease	promoter-TSS	promoter-TSS (NM_011206)	69	NM_011206	Ptpn18	0.057998	0.601869	promoter-TSS	promoter-TSS	promoter-TSS	Other
chr1	34462760	34463350	7.29	7.41	7.16	0.25	0.231	0.406	FALSE	No_SigChange	7.24	7.41	7.06	0.35	0.155	0.244	FALSE	No_SigChange	7.01	7.15	6.85	0.3	0.194	0.249	FALSE	No_SigChange	7.16	7.41	6.85	0.55	0.013	0.0217	FALSE	No_SigChange	intron	intron (NM_011206, intron 2 of 14)	3309	NM_011206	Ptpn18	0.022071	0.572881	intron	intron	intron	Other
chr1	34468170	34468930	7.35	7.21	7.47	-0.26	0.297	0.482	FALSE	No_SigChange	6.68	7.21	5.83	1.38	0.000181	0.0016	TRUE	SigDecrease	6.96	7.47	6.18	1.29	1.28e-07	1.26e-06	TRUE	SigDecrease	6.78	7.21	6.18	1.03	0.000317	0.000785	TRUE	SigDecrease	intron	intron (NM_011206, intron 6 of 14)	8804	NM_011206	Ptpn18	0.007905	0.436842	intron	intron	intron	Other
chr1	34471920	34473450	8.55	8.84	8.18	0.66	0.00123	0.00722	TRUE	SigDecrease	8.5	8.84	8.04	0.8	0.00171	0.00903	TRUE	SigDecrease	7.78	8.18	7.23	0.95	0.000369	0.00125	TRUE	SigDecrease	8.25	8.84	7.23	1.62	2.06e-10	1.97e-09	TRUE	SigDecrease	intron	intron (NM_011206, intron 12 of 14)	12939	NM_011206	Ptpn18	0.033355	0.584967	intron	intron	intron	Other
chr1	34485380	34486290	8	8.31	7.59	0.72	9.76e-05	0.00091	TRUE	SigDecrease	8.16	8.31	8	0.31	0.203	0.299	FALSE	No_SigChange	7.35	7.59	7.07	0.52	0.032	0.0538	FALSE	No_SigChange	7.82	8.31	7.07	1.24	2.15e-07	1.06e-06	TRUE	SigDecrease	Intergenic	Intergenic	-12595	NM_009355	Prss39	0.031903	0.534066	Intergenic	Intergenic	Intergenic	Other
chr1	34498390	34499290	6.84	7.18	6.38	0.8	0.00113	0.00675	TRUE	SigDecrease	7.02	7.18	6.83	0.35	0.24	0.34	FALSE	No_SigChange	5.84	6.38	4.96	1.42	8.85e-05	0.000368	TRUE	SigDecrease	6.46	7.18	4.96	2.22	3.16e-10	2.9e-09	TRUE	SigDecrease	intron	intron (NM_009355, intron 1 of 4)	410	NM_009355	Prss39	0.023359	0.534444	intron	intron	intron	Other
chr1	34510450	34511480	8	8.31	7.61	0.7	0.00309	0.0152	FALSE	No_SigChange	8.14	8.31	7.94	0.37	0.17	0.261	FALSE	No_SigChange	7.47	7.61	7.31	0.3	0.24	0.3	FALSE	No_SigChange	7.89	8.31	7.31	1	1.11e-05	3.8e-05	TRUE	SigDecrease	Intergenic	Intergenic	12535	NM_009355	Prss39	0.012634	0.547573	Intergenic	Intergenic	Intergenic	Other
chr1	34516620	34517290	6.56	5.92	7	-1.08	1.53e-05	0.000196	TRUE	SigIncrease	6.28	5.92	6.56	-0.63	0.0698	0.134	FALSE	No_SigChange	6.81	7	6.6	0.4	0.118	0.162	FALSE	No_SigChange	6.3	5.92	6.6	-0.68	0.0107	0.0182	FALSE	No_SigChange	Intergenic	RMER4B|LTR|ERVK	18525	NM_009355	Prss39	0.010463	0.465672	RMER4B	ERVK	LTR	LTR
chr1	34536350	34537660	8.8	9.02	8.54	0.48	0.0172	0.0588	FALSE	No_SigChange	8.93	9.02	8.83	0.19	0.504	0.603	FALSE	No_SigChange	8.38	8.54	8.21	0.33	0.199	0.255	FALSE	No_SigChange	8.67	9.02	8.21	0.81	0.00185	0.00381	TRUE	SigDecrease	intron	intron (NM_007685, intron 3 of 5)	1357	NM_007685	Cfc1	0.028266	0.516031	intron	intron	intron	Other
chr1	34543640	34544300	6.03	6.55	5.23	1.32	1.48e-05	0.000191	TRUE	SigDecrease	6.41	6.55	6.27	0.27	0.426	0.53	FALSE	No_SigChange	4.88	5.23	4.43	0.8	0.025	0.0436	FALSE	No_SigChange	5.84	6.54	4.43	2.12	1.06e-10	1.08e-09	TRUE	SigDecrease	intron	intron (NM_007685, intron 5 of 5)	8322	NM_007685	Cfc1	0.007587	0.518182	intron	intron	intron	Other
chr1	34560730	34560880	4.55	4.52	4.58	-0.06	0.871	0.93	FALSE	No_SigChange	4.49	4.52	4.46	0.06	0.882	0.916	FALSE	No_SigChange	4.52	4.58	4.46	0.12	0.744	0.786	FALSE	No_SigChange	4.49	4.52	4.46	0.06	0.874	0.895	FALSE	No_SigChange	exon	exon (NM_009356, exon 1 of 5)	138	NM_009356	Prss40	0.053691	0.593333	exon	exon	exon	Other
chr1	34569920	34570240	5.78	6.26	5.07	1.2	3.41e-05	0.000382	TRUE	SigDecrease	5.88	6.26	5.37	0.89	0.00369	0.016	FALSE	No_SigChange	4.64	5.06	4.04	1.02	0.0129	0.025	FALSE	No_SigChange	5.54	6.26	4.04	2.22	2.76e-10	2.55e-09	TRUE	SigDecrease	Intergenic	ORR1A1|LTR|ERVL-MaLR	-9137	NM_009356	Prss40	0.003135	0.490625	ORR1A1	ERVL-MaLR	LTR	LTR
chr1	34578630	34580240	8.82	8.95	8.69	0.27	0.225	0.398	FALSE	No_SigChange	8.63	8.95	8.22	0.73	0.0137	0.0414	FALSE	No_SigChange	8.23	8.68	7.57	1.11	3.42e-05	0.000162	TRUE	SigDecrease	8.42	8.95	7.57	1.38	2.25e-07	1.1e-06	TRUE	SigDecrease	promoter-TSS	promoter-TSS (NM_213727)	-258	NM_213727	Amer3	0.04537	0.578261	promoter-TSS	promoter-TSS	promoter-TSS	Other
chr1	34584040	34584240	5.05	5.34	4.69	0.65	0.0451	0.123	FALSE	No_SigChange	4.92	5.34	4.34	1	0.00527	0.0208	FALSE	No_SigChange	4.14	4.68	3.25	1.44	0.00151	0.00411	TRUE	SigDecrease	4.64	5.34	3.25	2.09	2.43e-07	1.18e-06	TRUE	SigDecrease	intron	intron (NM_213727, intron 1 of 1)	4447	NM_213727	Amer3	0.005025	0.585	intron	intron	intron	Other
chr1	34599890	34600510	5.99	4.81	6.63	-1.82	0.00435	0.02	FALSE	No_SigChange	5.05	4.81	5.26	-0.45	0.342	0.446	FALSE	No_SigChange	6.24	6.63	5.71	0.92	0.000584	0.00184	TRUE	SigDecrease	5.33	4.8	5.71	-0.9	0.0438	0.0641	FALSE	No_SigChange	Intergenic	RLTR27|LTR|ERVK	20507	NM_213727	Amer3	0.027464	0.5	RLTR27	ERVK	LTR	LTR
chr1	34602200	34602860	6.25	6.27	6.23	0.04	0.866	0.928	FALSE	No_SigChange	6.53	6.27	6.75	-0.49	0.0667	0.13	FALSE	No_SigChange	6.24	6.23	6.26	-0.03	0.902	0.92	FALSE	No_SigChange	6.26	6.26	6.26	0.01	0.974	0.979	FALSE	No_SigChange	Intergenic	Intergenic	22837	NM_213727	Amer3	0.01214	0.495455	Intergenic	Intergenic	Intergenic	Other
chr1	34633940	34634150	4.08	2.95	4.7	-1.75	0.000609	0.0041	TRUE	SigIncrease	3.19	2.95	3.39	-0.44	0.514	0.612	FALSE	No_SigChange	3.94	4.7	2.25	2.45	2.58e-06	1.75e-05	TRUE	SigDecrease	2.64	2.95	2.25	0.7	0.399	0.457	FALSE	No_SigChange	exon	non-coding (NR_033627, exon 1 of 1)	2165	NR_033627	AA619741	0.014354	0.571429	non-coding	non-coding	non-coding	Other
chr1	34635320	34636180	6.43	6.92	5.67	1.25	2.77e-05	0.000322	TRUE	SigDecrease	6.86	6.92	6.79	0.13	0.701	0.773	FALSE	No_SigChange	5.37	5.67	4.99	0.68	0.0505	0.0792	FALSE	No_SigChange	6.25	6.92	4.99	1.93	1.56e-09	1.22e-08	TRUE	SigDecrease	exon	non-coding (NR_033627, exon 1 of 1)	460	NR_033627	AA619741	0.034924	0.567442	non-coding	non-coding	non-coding	Other
chr1	34642470	34642930	6.46	6.31	6.59	-0.28	0.304	0.49	FALSE	No_SigChange	6.51	6.31	6.69	-0.37	0.276	0.378	FALSE	No_SigChange	6.63	6.59	6.67	-0.08	0.743	0.785	FALSE	No_SigChange	6.5	6.31	6.67	-0.36	0.223	0.274	FALSE	No_SigChange	Intergenic	Intergenic	-6490	NR_033627	AA619741	0.021786	0.497826	Intergenic	Intergenic	Intergenic	Other
chr1	34664880	34665220	4.99	4.09	5.55	-1.46	2.9e-05	0.000334	TRUE	SigIncrease	4.11	4.09	4.13	-0.04	0.935	0.955	FALSE	No_SigChange	5.36	5.54	5.16	0.39	0.177	0.231	FALSE	No_SigChange	4.72	4.09	5.16	-1.07	0.00637	0.0115	FALSE	No_SigChange	Intergenic	Intergenic	-28840	NR_033627	AA619741	0.023599	0.514706	Intergenic	Intergenic	Intergenic	Other
chr1	34677640	34679190	8.34	8.63	7.96	0.67	0.00525	0.0232	FALSE	No_SigChange	8.34	8.63	7.97	0.66	0.0483	0.102	FALSE	No_SigChange	7.73	7.96	7.45	0.5	0.0671	0.101	FALSE	No_SigChange	8.16	8.63	7.45	1.18	9.69e-05	0.00027	TRUE	SigDecrease	Intergenic	CpG	-42205	NR_033627	AA619741	0.045836	0.594839	CpG	CpG	CpG	Other
chr1	34700540	34701140	6.17	6.33	5.99	0.34	0.155	0.307	FALSE	No_SigChange	6.2	6.33	6.05	0.28	0.291	0.395	FALSE	No_SigChange	5.77	5.99	5.51	0.49	0.0729	0.108	FALSE	No_SigChange	5.98	6.33	5.51	0.82	0.00115	0.00249	TRUE	SigDecrease	Intergenic	Intergenic	-64630	NR_033627	AA619741	0.018364	0.486667	Intergenic	Intergenic	Intergenic	Other
chr1	34738360	34738740	5.79	5.71	5.86	-0.16	0.564	0.726	FALSE	No_SigChange	5.74	5.71	5.77	-0.06	0.836	0.881	FALSE	No_SigChange	5.94	5.86	6.02	-0.16	0.539	0.599	FALSE	No_SigChange	5.87	5.7	6.02	-0.32	0.29	0.346	FALSE	No_SigChange	Intergenic	Intergenic	-63172	NM_183019	Arhgef4	0.021108	0.476316	Intergenic	Intergenic	Intergenic	Other
chr1	34749370	34751710	8.55	8.54	8.56	-0.03	0.896	0.945	FALSE	No_SigChange	8.31	8.54	8.03	0.5	0.0639	0.125	FALSE	No_SigChange	8.22	8.56	7.76	0.8	0.000614	0.00192	TRUE	SigDecrease	8.2	8.53	7.76	0.77	0.00195	0.00399	TRUE	SigDecrease	Intergenic	CpG	-51182	NM_183019	Arhgef4	0.057717	0.6	CpG	CpG	CpG	Other
chr1	34801440	34802460	8.45	8.39	8.5	-0.1	0.592	0.747	FALSE	No_SigChange	8.22	8.39	8.03	0.36	0.131	0.214	FALSE	No_SigChange	8.11	8.49	7.59	0.91	0.000374	0.00126	TRUE	SigDecrease	8.04	8.39	7.59	0.81	0.00146	0.00307	TRUE	SigDecrease	5'UTR	5' UTR (NM_183019, exon 1 of 10)	228	NM_183019	Arhgef4	0.05103	0.623529	5'UTR	5'UTR	5'UTR	Other
chr1	34805830	34806510	6.89	7.29	6.34	0.95	0.000421	0.00304	TRUE	SigDecrease	6.72	7.29	5.79	1.5	0.0127	0.0392	FALSE	No_SigChange	5.69	6.34	4.47	1.86	1.32e-09	2.26e-08	TRUE	SigDecrease	6.48	7.29	4.47	2.81	7.49e-16	2.4e-14	TRUE	SigDecrease	intron	intron (NM_183019, intron 3 of 9)	4448	NM_183019	Arhgef4	0.051546	0.589706	intron	intron	intron	Other
chr1	34806800	34807090	4.5	3.61	5.04	-1.43	0.00229	0.012	FALSE	No_SigChange	3.25	3.61	2.75	0.86	0.267	0.369	FALSE	No_SigChange	4.51	5.04	3.64	1.4	0.00193	0.00506	TRUE	SigDecrease	3.63	3.61	3.64	-0.03	0.962	0.969	FALSE	No_SigChange	intron	intron (NM_183019, intron 4 of 9)	5223	NM_183019	Arhgef4	0.017301	0.47931	intron	intron	intron	Other
chr1	34842350	34843620	9.04	9.1	8.97	0.13	0.529	0.698	FALSE	No_SigChange	8.92	9.1	8.71	0.39	0.126	0.207	FALSE	No_SigChange	8.82	8.97	8.66	0.3	0.197	0.253	FALSE	No_SigChange	8.9	9.1	8.66	0.44	0.0561	0.0799	FALSE	No_SigChange	promoter-TSS	promoter-TSS (NM_001160235)	65	NM_001160235	Fam168b	0.090623	0.603937	promoter-TSS	promoter-TSS	promoter-TSS	Other
chr1	34849780	34850720	7.22	7.45	6.95	0.51	0.0154	0.0542	FALSE	No_SigChange	7.33	7.45	7.2	0.25	0.332	0.437	FALSE	No_SigChange	6.64	6.94	6.25	0.7	0.00504	0.0113	FALSE	No_SigChange	6.97	7.45	6.25	1.2	5.86e-07	2.63e-06	TRUE	SigDecrease	intron	intron (NM_175421, intron 1 of 6)	291	NM_145516	Plekhb2	0.048988	0.612766	intron	intron	intron	Other
chr1	34867310	34867500	6.37	6.43	6.31	0.12	0.579	0.738	FALSE	No_SigChange	6.12	6.43	5.73	0.69	0.00619	0.0234	FALSE	No_SigChange	6.13	6.31	5.94	0.37	0.126	0.173	FALSE	No_SigChange	6.2	6.43	5.94	0.49	0.0399	0.0589	FALSE	No_SigChange	intron	B3|SINE|B2	17446	NM_145516	Plekhb2	0.010582	0.526316	B3	B2	SINE	SINE
chr1	34929880	34930850	6.39	7.04	5.19	1.85	4.07e-14	7.94e-12	TRUE	SigDecrease	7.27	7.04	7.48	-0.44	0.0847	0.154	FALSE	No_SigChange	5.85	5.19	6.3	-1.11	5.82e-05	0.000257	TRUE	SigIncrease	6.71	7.04	6.3	0.74	0.00246	0.0049	TRUE	SigDecrease	Intergenic	CpG	80406	NM_145516	Plekhb2	0.05676	0.613402	CpG	CpG	CpG	Other
chr1	34961580	34961850	4.09	3.73	4.37	-0.65	0.133	0.275	FALSE	No_SigChange	4.66	3.73	5.23	-1.5	0.000998	0.00601	TRUE	SigIncrease	5.2	4.37	5.72	-1.35	1.73e-05	9.03e-05	TRUE	SigIncrease	5.04	3.73	5.72	-1.99	8.84e-08	4.73e-07	TRUE	SigIncrease	Intergenic	ORR1E|LTR|ERVL-MaLR	111756	NM_145516	Plekhb2	0.022305	0.5	ORR1E	ERVL-MaLR	LTR	LTR
chr1	34988370	34988620	4.63	4.15	4.99	-0.84	0.0271	0.0833	FALSE	No_SigChange	4.07	4.15	3.98	0.17	0.754	0.816	FALSE	No_SigChange	5.12	4.99	5.24	-0.25	0.398	0.464	FALSE	No_SigChange	4.79	4.15	5.24	-1.09	0.00471	0.00876	TRUE	SigIncrease	Intergenic	Intergenic	138536	NM_145516	Plekhb2	0.012048	0.52	Intergenic	Intergenic	Intergenic	Other
chr1	35017530	35017730	4.89	5.29	4.36	0.93	0.00764	0.0312	FALSE	No_SigChange	4.92	5.28	4.43	0.86	0.0171	0.0485	FALSE	No_SigChange	3.81	4.36	2.91	1.45	0.0028	0.00695	TRUE	SigDecrease	4.54	5.28	2.91	2.38	6.2e-08	3.43e-07	TRUE	SigDecrease	Intergenic	Intergenic	167671	NM_145516	Plekhb2	0.01005	0.48	Intergenic	Intergenic	Intergenic	Other
chr1	35232530	35232990	6.26	6.03	6.45	-0.43	0.102	0.227	FALSE	No_SigChange	5.51	6.03	4.7	1.33	0.000967	0.00586	TRUE	SigDecrease	5.86	6.45	4.82	1.63	1.76e-07	1.66e-06	TRUE	SigDecrease	5.54	6.03	4.82	1.21	0.000946	0.00209	TRUE	SigDecrease	Intergenic	L1MC|LINE|L1	382801	NM_145516	Plekhb2	0.004357	0.413043	L1MC	L1	LINE	LINE
chr1	35385410	35385790	6.16	5.9	6.38	-0.48	0.0865	0.2	FALSE	No_SigChange	5.88	5.9	5.85	0.05	0.863	0.901	FALSE	No_SigChange	6.15	6.38	5.87	0.51	0.069	0.103	FALSE	No_SigChange	5.88	5.9	5.87	0.03	0.916	0.93	FALSE	No_SigChange	Intergenic	MLT2F|LTR|ERVL	535641	NM_145516	Plekhb2	0.01847	0.513158	MLT2F	ERVL	LTR	LTR
chr1	35388180	35388540	5.43	4.64	5.94	-1.29	3.21e-05	0.000363	TRUE	SigIncrease	4.82	4.64	4.98	-0.33	0.358	0.463	FALSE	No_SigChange	5.63	5.93	5.24	0.7	0.0105	0.0209	FALSE	No_SigChange	4.97	4.64	5.24	-0.6	0.0815	0.112	FALSE	No_SigChange	Intergenic	Intergenic	538401	NM_145516	Plekhb2	0.013928	0.488889	Intergenic	Intergenic	Intergenic	Other
chr1	35392650	35392820	4.65	4.17	5.01	-0.84	0.028	0.0855	FALSE	No_SigChange	3.66	4.17	2.86	1.31	0.0148	0.0438	FALSE	No_SigChange	4.52	5.01	3.78	1.23	0.00184	0.00486	TRUE	SigDecrease	3.99	4.17	3.78	0.39	0.404	0.462	FALSE	No_SigChange	Intergenic	Intergenic	542776	NM_145516	Plekhb2	0.011834	0.564706	Intergenic	Intergenic	Intergenic	Other
chr1	35443080	35443250	2.73	3.36	1.58	1.77	0.0233	0.0743	FALSE	No_SigChange	4.14	3.36	4.64	-1.29	0.00498	0.02	FALSE	No_SigChange	4.46	1.58	5.36	-3.77	3.86e-12	1.31e-10	TRUE	SigIncrease	4.68	3.36	5.36	-2	1.38e-06	5.75e-06	TRUE	SigIncrease	Intergenic	Intergenic	593206	NM_145516	Plekhb2	0.005917	0.470588	Intergenic	Intergenic	Intergenic	Other
chr1	35687840	35688270	5.06	3.58	5.77	-2.19	3.85e-09	1.67e-07	TRUE	SigIncrease	4.56	3.58	5.14	-1.56	0.000279	0.00224	TRUE	SigIncrease	5.74	5.77	5.7	0.07	0.798	0.833	FALSE	No_SigChange	5	3.58	5.7	-2.12	1.51e-08	9.52e-08	TRUE	SigIncrease	Intergenic	Intergenic	-380345	NM_015818	Hs6st1	0.027972	0.513953	Intergenic	Intergenic	Intergenic	Other
chr1	35697760	35698250	7.17	6.83	7.44	-0.61	0.00679	0.0284	FALSE	No_SigChange	6.44	6.83	5.91	0.92	0.00165	0.00879	TRUE	SigDecrease	6.98	7.44	6.29	1.14	3.25e-07	2.84e-06	TRUE	SigDecrease	6.59	6.83	6.29	0.53	0.0482	0.0697	FALSE	No_SigChange	Intergenic	Intergenic	-370395	NM_015818	Hs6st1	0.014315	0.446939	Intergenic	Intergenic	Intergenic	Other
chr1	35715880	35716290	5.11	4.57	5.5	-0.93	0.00557	0.0243	FALSE	No_SigChange	4.96	4.57	5.27	-0.7	0.0664	0.129	FALSE	No_SigChange	5.55	5.5	5.6	-0.1	0.716	0.761	FALSE	No_SigChange	5.17	4.57	5.6	-1.03	0.00316	0.00613	TRUE	SigIncrease	Intergenic	Intergenic	-352315	NM_015818	Hs6st1	0.017115	0.502439	Intergenic	Intergenic	Intergenic	Other
chr1	35750070	35750570	6.3	6.14	6.44	-0.3	0.244	0.421	FALSE	No_SigChange	5.79	6.14	5.33	0.81	0.0213	0.0567	FALSE	No_SigChange	6.11	6.44	5.69	0.75	0.00936	0.0191	FALSE	No_SigChange	5.93	6.14	5.69	0.44	0.155	0.198	FALSE	No_SigChange	Intergenic	Intergenic	-318080	NM_015818	Hs6st1	0.008016	0.492	Intergenic	Intergenic	Intergenic	Other
chr1	35763330	35763710	5.63	5.91	5.28	0.64	0.0404	0.113	FALSE	No_SigChange	5.75	5.91	5.56	0.35	0.334	0.438	FALSE	No_SigChange	5.02	5.27	4.7	0.57	0.0638	0.0966	FALSE	No_SigChange	5.43	5.91	4.7	1.21	0.000448	0.00107	TRUE	SigDecrease	Intergenic	RMER1A|Other|Other	-304880	NM_015818	Hs6st1	0.01847	0.602632	RMER1A	Other	Other	Other
chr1	35822490	35823090	6.02	6.65	4.87	1.78	1.4e-11	1.25e-09	TRUE	SigDecrease	6.14	6.65	5.34	1.31	0.000643	0.00428	TRUE	SigDecrease	4.47	4.87	3.93	0.94	0.017	0.0315	FALSE	No_SigChange	5.85	6.65	3.93	2.72	1.16e-18	6.87e-17	TRUE	SigDecrease	Intergenic	Intergenic	-245610	NM_015818	Hs6st1	0.021703	0.498333	Intergenic	Intergenic	Intergenic	Other
chr1	35839450	35839850	6.25	6.09	6.39	-0.3	0.286	0.469	FALSE	No_SigChange	6.12	6.09	6.15	-0.06	0.831	0.877	FALSE	No_SigChange	6.44	6.39	6.48	-0.1	0.731	0.774	FALSE	No_SigChange	6.3	6.09	6.48	-0.39	0.187	0.234	FALSE	No_SigChange	Intergenic	Intergenic	-228750	NM_015818	Hs6st1	0.012531	0.5125	Intergenic	Intergenic	Intergenic	Other
chr1	35846690	35846900	5.2	4.63	5.61	-0.98	0.00126	0.00737	TRUE	SigIncrease	4.27	4.63	3.78	0.85	0.0905	0.162	FALSE	No_SigChange	5.27	5.6	4.83	0.77	0.0125	0.0243	FALSE	No_SigChange	4.73	4.63	4.83	-0.2	0.558	0.612	FALSE	No_SigChange	Intergenic	Intergenic	-221605	NM_015818	Hs6st1	0.004785	0.538095	Intergenic	Intergenic	Intergenic	Other
chr1	35869590	35870230	8	7.95	8.05	-0.09	0.604	0.756	FALSE	No_SigChange	7.64	7.95	7.25	0.7	0.00292	0.0135	FALSE	No_SigChange	7.82	8.05	7.55	0.5	0.0185	0.0339	FALSE	No_SigChange	7.76	7.95	7.55	0.4	0.0499	0.0719	FALSE	No_SigChange	Intergenic	Intergenic	-198490	NM_015818	Hs6st1	0.021909	0.475	Intergenic	Intergenic	Intergenic	Other
chr1	35904130	35904320	4.69	5.32	3.52	1.8	5.52e-05	0.00057	TRUE	SigDecrease	5.18	5.32	5.03	0.29	0.493	0.593	FALSE	No_SigChange	3.11	3.52	2.52	1	0.165	0.218	FALSE	No_SigChange	4.51	5.32	2.52	2.8	5.73e-09	3.97e-08	TRUE	SigDecrease	Intergenic	RMER15|LTR|ERVL	-164175	NM_015818	Hs6st1	0.015873	0.515789	RMER15	ERVL	LTR	LTR
chr1	35944230	35944740	6.61	6.74	6.46	0.28	0.277	0.46	FALSE	No_SigChange	5.93	6.74	3.88	2.86	1.12e-14	6.35e-12	TRUE	SigDecrease	5.66	6.46	3.73	2.73	0.000251	0.000899	TRUE	SigDecrease	5.91	6.74	3.73	3.01	7.59e-05	0.000217	TRUE	SigDecrease	Intergenic	Intergenic	-123915	NM_015818	Hs6st1	0.009823	0.454902	Intergenic	Intergenic	Intergenic	Other
chr1	35962090	35962290	5.43	4.64	5.94	-1.29	6.26e-05	0.000633	TRUE	SigIncrease	4.8	4.64	4.94	-0.3	0.448	0.551	FALSE	No_SigChange	5.61	5.93	5.19	0.75	0.0101	0.0203	FALSE	No_SigChange	4.94	4.64	5.19	-0.55	0.118	0.155	FALSE	No_SigChange	Intergenic	Intergenic	-106210	NM_015818	Hs6st1	0.020101	0.49	Intergenic	Intergenic	Intergenic	Other
chr1	35985510	35985660	4.39	3.91	4.75	-0.85	0.0857	0.199	FALSE	No_SigChange	3.77	3.91	3.61	0.29	0.627	0.711	FALSE	No_SigChange	4.57	4.75	4.36	0.4	0.287	0.35	FALSE	No_SigChange	4.15	3.9	4.36	-0.45	0.396	0.454	FALSE	No_SigChange	Intergenic	Intergenic	-82815	NM_015818	Hs6st1	0.020134	0.506667	Intergenic	Intergenic	Intergenic	Other
chr1	36013560	36014470	8.11	8.19	8.03	0.15	0.42	0.605	FALSE	No_SigChange	8.05	8.18	7.89	0.29	0.3	0.404	FALSE	No_SigChange	7.63	8.03	7.07	0.96	0.000194	0.000721	TRUE	SigDecrease	7.73	8.18	7.07	1.11	8.02e-06	2.83e-05	TRUE	SigDecrease	Intergenic	RMER20C_Mm|LTR|ERVK	-54385	NM_015818	Hs6st1	0.015402	0.517582	RMER20C_Mm	ERVK	LTR	LTR
chr1	36016890	36017720	8.13	8.33	7.9	0.43	0.029	0.0876	FALSE	No_SigChange	8.07	8.33	7.76	0.57	0.0384	0.0866	FALSE	No_SigChange	7.54	7.9	7.06	0.84	0.000993	0.00289	TRUE	SigDecrease	7.83	8.33	7.06	1.27	1.45e-07	7.43e-07	TRUE	SigDecrease	Intergenic	Intergenic	-51095	NM_015818	Hs6st1	0.015682	0.510843	Intergenic	Intergenic	Intergenic	Other
chr1	36030600	36031040	6.13	5.81	6.4	-0.58	0.0376	0.107	FALSE	No_SigChange	5.33	5.81	4.58	1.23	0.0016	0.00857	TRUE	SigDecrease	6.13	6.39	5.81	0.59	0.0671	0.101	FALSE	No_SigChange	5.81	5.81	5.81	0	0.989	0.992	FALSE	No_SigChange	Intergenic	Intergenic	-37580	NM_015818	Hs6st1	0.04328	0.577273	Intergenic	Intergenic	Intergenic	Other
chr1	36059840	36061750	8.95	9.1	8.79	0.31	0.165	0.32	FALSE	No_SigChange	8.66	9.09	8.02	1.07	0.0013	0.00733	TRUE	SigDecrease	8.27	8.79	7.46	1.33	9.24e-08	9.44e-07	TRUE	SigDecrease	8.5	9.09	7.46	1.64	3.06e-10	2.81e-09	TRUE	SigDecrease	Intergenic	Intergenic	-7605	NM_015818	Hs6st1	0.012048	0.500524	Intergenic	Intergenic	Intergenic	Other
chr1	36063250	36063440	5.42	5.77	4.94	0.83	0.0054	0.0237	FALSE	No_SigChange	5.19	5.77	4.19	1.58	3.01e-05	0.000388	TRUE	SigDecrease	4.5	4.94	3.86	1.08	0.00879	0.0181	FALSE	No_SigChange	5.11	5.77	3.86	1.92	1.06e-07	5.6e-07	TRUE	SigDecrease	Intergenic	Intergenic	-5055	NM_015818	Hs6st1	0.010582	0.515789	Intergenic	Intergenic	Intergenic	Other
chr1	36064700	36065830	8.49	8.62	8.36	0.26	0.259	0.439	FALSE	No_SigChange	8.31	8.61	7.93	0.68	0.0107	0.0348	FALSE	No_SigChange	8	8.36	7.52	0.84	0.00101	0.00293	TRUE	SigDecrease	8.17	8.61	7.52	1.09	3.83e-06	1.45e-05	TRUE	SigDecrease	Intergenic	Intergenic	-3135	NM_015818	Hs6st1	0.026572	0.520354	Intergenic	Intergenic	Intergenic	Other
chr1	36067920	36069800	9.59	9.46	9.7	-0.24	0.271	0.453	FALSE	No_SigChange	9.19	9.46	8.85	0.61	0.0363	0.0831	FALSE	No_SigChange	9.34	9.7	8.86	0.84	0.00135	0.00375	TRUE	SigDecrease	9.19	9.46	8.86	0.6	0.0226	0.0355	FALSE	No_SigChange	exon	exon (NM_015818, exon 1 of 2)	460	NM_015818	Hs6st1	0.092602	0.673936	exon	exon	exon	Other
chr1	36085220	36085400	5.06	3.58	5.77	-2.19	0.00801	0.0324	FALSE	No_SigChange	2.7	3.58	0	3.58	0.000903	0.00557	TRUE	SigDecrease	5.05	5.77	3.52	2.25	9.84e-11	2.26e-09	TRUE	SigDecrease	3.55	3.58	3.52	0.06	0.93	0.942	FALSE	No_SigChange	intron	PB1|SINE|Alu	16910	NM_015818	Hs6st1	0.005587	0.477778	PB1	Alu	SINE	SINE
chr1	36089440	36090100	6.66	6.44	6.84	-0.4	0.0974	0.219	FALSE	No_SigChange	6.16	6.44	5.81	0.63	0.0182	0.0507	FALSE	No_SigChange	6.24	6.84	5.2	1.64	3.51e-09	5.35e-08	TRUE	SigDecrease	5.95	6.44	5.2	1.24	1.32e-05	4.45e-05	TRUE	SigDecrease	intron	intron (NM_015818, intron 1 of 1)	21370	NM_015818	Hs6st1	0.013657	0.568182	intron	intron	intron	Other
chr1	36103580	36104040	6.04	6.1	5.99	0.11	0.668	0.803	FALSE	No_SigChange	5.62	6.1	4.92	1.18	0.000341	0.00262	TRUE	SigDecrease	5.27	5.99	3.81	2.18	0.0131	0.0254	FALSE	No_SigChange	5.36	6.1	3.81	2.29	0.011	0.0187	FALSE	No_SigChange	exon	exon (NM_015818, exon 2 of 2)	35410	NM_015818	Hs6st1	0.063181	0.6	exon	exon	exon	Other
chr1	36124290	36124650	5.25	2.52	6.13	-3.61	1.65e-07	4.16e-06	TRUE	SigIncrease	2.67	2.52	2.81	-0.29	0.73	0.797	FALSE	No_SigChange	5.53	6.13	4.49	1.64	1.94e-08	2.4e-07	TRUE	SigDecrease	3.82	2.52	4.49	-1.97	0.00106	0.00232	TRUE	SigIncrease	Intergenic	Intergenic	56070	NM_015818	Hs6st1	0.008357	0.655556	Intergenic	Intergenic	Intergenic	Other
chr1	36134760	36134960	5.4	5.22	5.57	-0.35	0.22	0.393	FALSE	No_SigChange	4.96	5.22	4.64	0.57	0.0927	0.165	FALSE	No_SigChange	5.49	5.57	5.4	0.17	0.552	0.612	FALSE	No_SigChange	5.31	5.22	5.4	-0.18	0.559	0.613	FALSE	No_SigChange	Intergenic	Intergenic	66460	NM_015818	Hs6st1	0.015075	0.44	Intergenic	Intergenic	Intergenic	Other
chr1	36149450	36149990	5.83	5.32	6.21	-0.89	0.000829	0.00527	TRUE	SigIncrease	5.14	5.32	4.94	0.38	0.28	0.383	FALSE	No_SigChange	5.8	6.21	5.23	0.98	0.00127	0.00356	TRUE	SigDecrease	5.27	5.32	5.23	0.09	0.789	0.821	FALSE	No_SigChange	intron	intron (NM_198899, intron 38 of 40)	81320	NM_015818	Hs6st1	0.001855	0.444444	intron	intron	intron	Other
chr1	36240110	36240460	5.58	5.31	5.81	-0.49	0.0975	0.219	FALSE	No_SigChange	4.54	5.31	2.75	2.56	0.00377	0.0163	FALSE	No_SigChange	5.3	5.8	4.52	1.28	6.66e-05	0.000288	TRUE	SigDecrease	4.97	5.31	4.52	0.79	0.0334	0.0504	FALSE	No_SigChange	intron	intron (NM_198899, intron 1 of 40)	4017	NM_198899	Uggt1	0.014327	0.517143	intron	intron	intron	Other
chr1	36243940	36244780	8.51	8.51	8.51	0.01	0.976	0.988	FALSE	No_SigChange	8.23	8.51	7.88	0.63	0.0293	0.0714	FALSE	No_SigChange	8.21	8.51	7.84	0.66	0.0129	0.0249	FALSE	No_SigChange	8.22	8.51	7.84	0.67	0.00848	0.0148	FALSE	No_SigChange	promoter-TSS	promoter-TSS (NM_198899)	-58	NM_198899	Uggt1	0.067938	0.579762	promoter-TSS	promoter-TSS	promoter-TSS	Other
chr1	36246850	36247040	5.17	5.04	5.29	-0.25	0.448	0.629	FALSE	No_SigChange	4.29	5.04	2.64	2.4	1.2e-06	2.83e-05	TRUE	SigDecrease	4.58	5.29	3.09	2.21	1.36e-07	1.33e-06	TRUE	SigDecrease	4.37	5.04	3.09	1.96	2.08e-05	6.73e-05	TRUE	SigDecrease	Intergenic	RLTR20B3A_MM|LTR|ERVK	-2643	NM_198899	Uggt1	0.005291	0.5	RLTR20B3A_MM	ERVK	LTR	LTR
chr1	36251350	36251810	6.17	6.57	5.62	0.95	4.63e-05	0.000492	TRUE	SigDecrease	6.06	6.57	5.29	1.28	3.39e-06	6.59e-05	TRUE	SigDecrease	5.26	5.62	4.79	0.83	0.0187	0.0342	FALSE	No_SigChange	5.94	6.57	4.79	1.77	1.05e-07	5.54e-07	TRUE	SigDecrease	Intergenic	Intergenic	-7278	NM_198899	Uggt1	0.021786	0.495652	Intergenic	Intergenic	Intergenic	Other
chr1	36252860	36253220	6.23	6.22	6.25	-0.03	0.904	0.949	FALSE	No_SigChange	6.13	6.22	6.04	0.18	0.543	0.638	FALSE	No_SigChange	5.96	6.25	5.59	0.65	0.0126	0.0245	FALSE	No_SigChange	5.94	6.22	5.59	0.63	0.0216	0.0342	FALSE	No_SigChange	Intergenic	Intergenic	-8738	NM_198899	Uggt1	0.013928	0.472222	Intergenic	Intergenic	Intergenic	Other
chr1	36254620	36255320	7.57	7.55	7.58	-0.03	0.873	0.931	FALSE	No_SigChange	7.31	7.55	7.01	0.54	0.0587	0.118	FALSE	No_SigChange	7.29	7.58	6.93	0.65	0.00551	0.0122	FALSE	No_SigChange	7.27	7.55	6.93	0.62	0.0144	0.0238	FALSE	No_SigChange	Intergenic	Intergenic	-10668	NM_198899	Uggt1	0.034335	0.564286	Intergenic	Intergenic	Intergenic	Other
chr1	36256200	36256640	5.1	4.66	5.43	-0.78	0.0167	0.0577	FALSE	No_SigChange	4.89	4.66	5.09	-0.43	0.229	0.328	FALSE	No_SigChange	5.47	5.43	5.5	-0.07	0.831	0.861	FALSE	No_SigChange	5.14	4.66	5.5	-0.84	0.00938	0.0162	FALSE	No_SigChange	Intergenic	B2_Mm2|SINE|B2	-12118	NM_198899	Uggt1	0.01139	0.425	B2_Mm2	B2	SINE	SINE
chr1	36258620	36259080	4.48	3.39	5.09	-1.7	0.00108	0.00652	TRUE	SigIncrease	4.75	3.39	5.43	-2.04	1.17e-05	0.000181	TRUE	SigIncrease	5.38	5.08	5.62	-0.54	0.144	0.193	FALSE	No_SigChange	4.9	3.39	5.62	-2.23	8.29e-07	3.61e-06	TRUE	SigIncrease	Intergenic	GA-rich|Low_complexity|Low_complexity	-14548	NM_198899	Uggt1	0.004357	0.641304	GA-rich	Low_complexity	Low_complexity	Other
chr1	36269220	36270020	7.14	7.48	6.7	0.78	0.00327	0.016	FALSE	No_SigChange	7.2	7.48	6.86	0.61	0.0324	0.0767	FALSE	No_SigChange	6.43	6.7	6.09	0.62	0.0752	0.111	FALSE	No_SigChange	6.94	7.48	6.09	1.39	2.73e-05	8.59e-05	TRUE	SigDecrease	exon	exon (NM_153408, exon 2 of 4)	3805	NM_153408	Neurl3	0.067584	0.6125	exon	exon	exon	Other
chr1	36277280	36277710	6.44	6.65	6.2	0.45	0.0487	0.13	FALSE	No_SigChange	6.44	6.65	6.19	0.45	0.109	0.186	FALSE	No_SigChange	6.09	6.2	5.98	0.23	0.422	0.487	FALSE	No_SigChange	6.35	6.65	5.98	0.67	0.018	0.029	FALSE	No_SigChange	Intergenic	Intergenic	-4070	NM_153408	Neurl3	0.013986	0.527907	Intergenic	Intergenic	Intergenic	Other
chr1	36279210	36279600	6.15	6.14	6.16	-0.02	0.937	0.967	FALSE	No_SigChange	6	6.14	5.83	0.31	0.269	0.371	FALSE	No_SigChange	5.97	6.16	5.75	0.41	0.122	0.168	FALSE	No_SigChange	5.96	6.14	5.75	0.39	0.176	0.221	FALSE	No_SigChange	Intergenic	Intergenic	-5980	NM_153408	Neurl3	0.007712	0.492308	Intergenic	Intergenic	Intergenic	Other
chr1	36288700	36288930	4.81	5.01	4.58	0.43	0.199	0.367	FALSE	No_SigChange	4.68	5.01	4.25	0.76	0.0485	0.103	FALSE	No_SigChange	4	4.58	3	1.58	0.000723	0.00221	TRUE	SigDecrease	4.33	5.01	3	2.01	3.97e-06	1.5e-05	TRUE	SigDecrease	Intergenic	B1_Mur4|SINE|Alu	-15390	NM_153408	Neurl3	0.0131	0.526087	B1_Mur4	Alu	SINE	SINE
chr1	36303260	36304020	7.13	7.31	6.92	0.39	0.0839	0.196	FALSE	No_SigChange	7.25	7.31	7.17	0.14	0.613	0.699	FALSE	No_SigChange	6.73	6.92	6.5	0.42	0.112	0.156	FALSE	No_SigChange	6.96	7.31	6.5	0.81	0.000494	0.00117	TRUE	SigDecrease	Intergenic	Intergenic	-4093	NM_145996	Arid5a	0.043478	0.575	Intergenic	Intergenic	Intergenic	Other
chr1	36307370	36308780	8.99	9.03	8.95	0.08	0.705	0.828	FALSE	No_SigChange	8.58	9.02	7.94	1.08	7.02e-05	0.000764	TRUE	SigDecrease	8.57	8.95	8.05	0.9	0.000261	0.000929	TRUE	SigDecrease	8.62	9.02	8.05	0.97	1.94e-05	6.31e-05	TRUE	SigDecrease	intron	CpG	342	NR_033310	Arid5a	0.059617	0.580142	CpG	CpG	CpG	Other
chr1	36314780	36315700	8.11	7.99	8.22	-0.23	0.317	0.503	FALSE	No_SigChange	7.76	7.98	7.5	0.48	0.11	0.187	FALSE	No_SigChange	7.96	8.21	7.64	0.57	0.0295	0.0501	FALSE	No_SigChange	7.82	7.98	7.64	0.34	0.133	0.173	FALSE	No_SigChange	intron	PB1D9|SINE|Alu	7507	NR_033310	Arid5a	0.014146	0.530435	PB1D9	Alu	SINE	SINE
chr1	36317740	36318360	6.05	7.01	2.17	4.84	3.95e-15	1.03e-12	TRUE	SigDecrease	6.44	7	5.52	1.49	5.18e-08	2.17e-06	TRUE	SigDecrease	1.86	2.17	1.46	0.71	0.495	0.558	FALSE	No_SigChange	6.03	7	1.46	5.54	2.64e-27	9.82e-25	TRUE	SigDecrease	intron	intron (NR_033310, intron 3 of 5)	10317	NR_033310	Arid5a	0.021002	0.583871	intron	intron	intron	Other
chr1	36321770	36322250	6.09	5.91	6.26	-0.35	0.196	0.362	FALSE	No_SigChange	5.49	5.91	4.91	1	0.00399	0.017	FALSE	No_SigChange	5.77	6.25	5.02	1.23	1.27e-05	6.94e-05	TRUE	SigDecrease	5.53	5.9	5.02	0.88	0.00369	0.00705	TRUE	SigDecrease	3'UTR	non-coding (NR_033310, exon 6 of 6)	14277	NR_033310	Arid5a	0.012526	0.520833	non-coding	non-coding	non-coding	Other
chr1	36324050	36324560	6.77	6.6	6.92	-0.33	0.154	0.306	FALSE	No_SigChange	6.29	6.59	5.91	0.69	0.016	0.0462	FALSE	No_SigChange	6.45	6.92	5.75	1.17	1.63e-06	1.16e-05	TRUE	SigDecrease	6.23	6.59	5.75	0.85	0.000716	0.00163	TRUE	SigDecrease	TTS	TTS (NM_001290726)	16572	NR_033310	Arid5a	0.017682	0.527451	TTS	TTS	TTS	Other
chr1	36353960	36354300	4.61	3.83	5.12	-1.29	0.00243	0.0125	FALSE	No_SigChange	3.52	3.83	3.13	0.7	0.308	0.412	FALSE	No_SigChange	4.98	5.12	4.83	0.28	0.367	0.433	FALSE	No_SigChange	4.42	3.83	4.83	-1	0.0263	0.0407	FALSE	No_SigChange	exon	exon (NM_172652, exon 7 of 21)	15051	NM_172652	Kansl3	0.020649	0.511765	exon	exon	exon	Other
chr1	36368390	36369520	9.02	9.04	8.99	0.05	0.795	0.886	FALSE	No_SigChange	8.81	9.04	8.54	0.5	0.0627	0.124	FALSE	No_SigChange	8.78	8.99	8.55	0.44	0.0785	0.115	FALSE	No_SigChange	8.81	9.04	8.55	0.49	0.0455	0.0662	FALSE	No_SigChange	intron	CpG	226	NM_172652	Kansl3	0.093888	0.659292	CpG	CpG	CpG	Other
chr1	36444700	36445660	9.09	9.11	9.06	0.05	0.781	0.878	FALSE	No_SigChange	8.9	9.11	8.65	0.46	0.0923	0.164	FALSE	No_SigChange	8.76	9.06	8.37	0.69	0.00146	0.00399	TRUE	SigDecrease	8.79	9.11	8.37	0.73	0.00054	0.00127	TRUE	SigDecrease	promoter-TSS	promoter-TSS (NM_001013374)	59	NM_001013374	Lman2l	0.058394	0.579167	promoter-TSS	promoter-TSS	promoter-TSS	Other
chr1	36467470	36467930	6.76	6.79	6.72	0.07	0.787	0.882	FALSE	No_SigChange	6.49	6.79	6.11	0.68	0.0292	0.0712	FALSE	No_SigChange	6.46	6.72	6.15	0.57	0.0249	0.0435	FALSE	No_SigChange	6.5	6.79	6.15	0.64	0.0277	0.0426	FALSE	No_SigChange	Intergenic	Intergenic	-3897	NM_033570	Cnnm4	0.019608	0.508696	Intergenic	Intergenic	Intergenic	Other
chr1	36471130	36472290	9.03	9.07	8.99	0.09	0.682	0.813	FALSE	No_SigChange	8.76	9.07	8.35	0.72	0.0174	0.0491	FALSE	No_SigChange	8.68	8.98	8.3	0.69	0.00568	0.0125	FALSE	No_SigChange	8.73	9.07	8.3	0.77	0.0018	0.00371	TRUE	SigDecrease	exon	exon (NM_033570, exon 1 of 7)	113	NM_033570	Cnnm4	0.095772	0.669828	exon	exon	exon	Other
chr1	36492440	36492750	5.67	5.34	5.93	-0.59	0.022	0.0711	FALSE	No_SigChange	5.28	5.34	5.21	0.13	0.684	0.759	FALSE	No_SigChange	5.31	5.93	4.21	1.72	1.49e-08	1.91e-07	TRUE	SigDecrease	4.88	5.34	4.21	1.13	0.00121	0.0026	TRUE	SigDecrease	intron	intron (NM_033570, intron 1 of 6)	-19281	NM_001039551	Cnnm3	0.016181	0.590323	intron	intron	intron	Other
chr1	36501290	36501700	6.55	6.34	6.74	-0.41	0.0753	0.181	FALSE	No_SigChange	6.01	6.33	5.59	0.74	0.0315	0.0751	FALSE	No_SigChange	6.57	6.74	6.38	0.36	0.156	0.207	FALSE	No_SigChange	6.36	6.33	6.38	-0.05	0.84	0.866	FALSE	No_SigChange	intron	intron (NM_033570, intron 5 of 6)	-10381	NM_001039551	Cnnm3	0.00978	0.526829	intron	intron	intron	Other
chr1	36511310	36513000	10.12	9.99	10.24	-0.25	0.222	0.395	FALSE	No_SigChange	9.72	9.99	9.39	0.61	0.0303	0.0731	FALSE	No_SigChange	9.94	10.24	9.57	0.67	0.0068	0.0146	FALSE	No_SigChange	9.8	9.99	9.57	0.42	0.0763	0.105	FALSE	No_SigChange	exon	exon (NM_001039551, exon 1 of 9)	279	NM_053186	Cnnm3	0.111901	0.705325	exon	exon	exon	Other
chr1	36513740	36513970	5.73	5.65	5.8	-0.15	0.61	0.761	FALSE	No_SigChange	5.05	5.65	4.02	1.63	3.1e-05	0.000397	TRUE	SigDecrease	5.33	5.8	4.63	1.17	0.00064	0.00199	TRUE	SigDecrease	5.23	5.65	4.63	1.02	0.00293	0.00573	TRUE	SigDecrease	intron	B3|SINE|B2	1979	NM_053186	Cnnm3	0.008734	0.404348	B3	B2	SINE	SINE
chr1	36531810	36532510	6.66	6.9	6.37	0.53	0.0334	0.0979	FALSE	No_SigChange	6.45	6.9	5.79	1.11	0.00191	0.0098	TRUE	SigDecrease	5.75	6.36	4.66	1.71	8.17e-07	6.36e-06	TRUE	SigDecrease	6.17	6.9	4.66	2.24	5.91e-10	5.11e-09	TRUE	SigDecrease	exon	exon (NM_153502, exon 6 of 9)	3569	NM_153502	Ankrd23	0.031474	0.582857	exon	exon	exon	Other
chr1	36533330	36533810	5.75	5.8	5.69	0.11	0.68	0.811	FALSE	No_SigChange	5.37	5.8	4.77	1.03	0.00204	0.0103	FALSE	No_SigChange	5.31	5.69	4.79	0.9	0.00256	0.00643	TRUE	SigDecrease	5.38	5.8	4.79	1.01	0.00186	0.00381	TRUE	SigDecrease	intron	B2_Mm2|SINE|B2	2159	NM_153502	Ankrd23	0.014614	0.5125	B2_Mm2	B2	SINE	SINE
chr1	36545810	36546330	6.39	6.45	6.34	0.12	0.631	0.777	FALSE	No_SigChange	6.13	6.45	5.73	0.72	0.0154	0.045	FALSE	No_SigChange	5.75	6.33	4.77	1.57	4.76e-07	3.97e-06	TRUE	SigDecrease	5.84	6.45	4.77	1.68	5.97e-08	3.31e-07	TRUE	SigDecrease	intron	B1_Mm|SINE|Alu	1131	NM_026241	Ankrd39	0.023121	0.513462	B1_Mm	Alu	SINE	SINE
chr1	36546630	36547840	9.13	9.29	8.96	0.32	0.108	0.236	FALSE	No_SigChange	9.01	9.28	8.67	0.61	0.0223	0.0586	FALSE	No_SigChange	8.69	8.96	8.36	0.6	0.0166	0.0308	FALSE	No_SigChange	8.89	9.28	8.36	0.92	0.000188	0.000491	TRUE	SigDecrease	promoter-TSS	promoter-TSS (NM_026241)	-34	NM_026241	Ankrd39	0.048801	0.586777	promoter-TSS	promoter-TSS	promoter-TSS	Other
chr1	36555840	36558900	10.31	10.43	10.18	0.26	0.239	0.416	FALSE	No_SigChange	10.1	10.43	9.67	0.77	0.00631	0.0237	FALSE	No_SigChange	9.68	10.17	8.91	1.27	2.45e-06	1.67e-05	TRUE	SigDecrease	9.86	10.43	8.91	1.52	5.65e-09	3.92e-08	TRUE	SigDecrease	intron	CpG	1011	NM_001126047	Sema4c	0.057535	0.634314	CpG	CpG	CpG	Other
chr1	36566510	36566700	4.79	5.27	4.07	1.2	0.00224	0.0117	FALSE	No_SigChange	4.45	5.27	2.39	2.87	1.3e-07	4.62e-06	TRUE	SigDecrease	3.41	4.06	2.17	1.89	0.00238	0.00604	TRUE	SigDecrease	4.42	5.26	2.17	3.1	5.44e-09	3.79e-08	TRUE	SigDecrease	intron	intron (NM_001126046, intron 12 of 14)	-8224	NM_001126047	Sema4c	0.010582	0.526316	intron	intron	intron	Other
chr1	36580020	36581120	8.9	8.99	8.79	0.21	0.391	0.578	FALSE	No_SigChange	8.62	8.99	8.11	0.88	0.0027	0.0127	FALSE	No_SigChange	8.14	8.79	6.94	1.85	3.28e-11	8.57e-10	TRUE	SigDecrease	8.3	8.99	6.94	2.06	2.87e-13	5.19e-12	TRUE	SigDecrease	intron	intron (NM_001126046, intron 11 of 14)	12762	NM_027957	Fam178b	0.020018	0.583636	intron	intron	intron	Other
chr1	36592730	36593590	7.86	7.69	8.02	-0.33	0.181	0.342	FALSE	No_SigChange	7.26	7.69	6.64	1.05	0.00241	0.0117	FALSE	No_SigChange	7.28	8.01	5.72	2.29	6.99e-18	1.02e-15	TRUE	SigDecrease	7.02	7.69	5.72	1.97	4.57e-11	5.05e-10	TRUE	SigDecrease	intron	(AGGGGG)n|Simple_repeat|Simple_repeat	172	NM_027957	Fam178b	0.009313	0.548837	(AGGGGG)n	Simple_repeat	Simple_repeat	Other
chr1	36596060	36596460	5.86	6.01	5.69	0.32	0.249	0.427	FALSE	No_SigChange	5.65	6.01	5.17	0.84	0.00686	0.0252	FALSE	No_SigChange	5.11	5.68	4.15	1.54	3.33e-05	0.000159	TRUE	SigDecrease	5.36	6.01	4.15	1.86	3.06e-07	1.46e-06	TRUE	SigDecrease	intron	intron (NM_001126046, intron 10 of 14)	-2928	NM_027957	Fam178b	0.007519	0.51	intron	intron	intron	Other
chr1	36616040	36616220	4.85	4.86	4.85	0.01	0.972	0.986	FALSE	No_SigChange	4.47	4.86	3.95	0.9	0.0546	0.112	FALSE	No_SigChange	4.42	4.84	3.81	1.04	0.0137	0.0262	FALSE	No_SigChange	4.42	4.86	3.81	1.05	0.00845	0.0148	FALSE	No_SigChange	intron	B3A|SINE|B2	-22798	NM_027957	Fam178b	0.011173	0.5	B3A	B2	SINE	SINE
chr1	36634950	36635400	6.78	6.81	6.75	0.07	0.773	0.873	FALSE	No_SigChange	6.48	6.81	6.05	0.76	0.0128	0.0395	FALSE	No_SigChange	6.39	6.75	5.92	0.83	0.000937	0.00275	TRUE	SigDecrease	6.43	6.81	5.92	0.89	0.000224	0.000574	TRUE	SigDecrease	exon	exon (NM_201365, exon 5 of 10)	-41843	NM_027957	Fam178b	0.011136	0.566667	exon	exon	exon	Other
chr1	36682690	36683440	7.39	7.33	7.44	-0.11	0.7	0.824	FALSE	No_SigChange	7.21	7.33	7.08	0.25	0.427	0.53	FALSE	No_SigChange	7.11	7.44	6.7	0.74	0.0127	0.0246	FALSE	No_SigChange	7.05	7.33	6.7	0.63	0.0399	0.0589	FALSE	No_SigChange	5'UTR	5' UTR (NM_201365, exon 1 of 10)	118	NM_201365	Fam178b	0.06008	0.616	5'UTR	5'UTR	5'UTR	Other
chr1	36683990	36684650	7.3	7.41	7.17	0.24	0.228	0.403	FALSE	No_SigChange	7.27	7.41	7.11	0.3	0.208	0.304	FALSE	No_SigChange	7.07	7.17	6.96	0.21	0.35	0.416	FALSE	No_SigChange	7.2	7.41	6.96	0.45	0.0339	0.051	FALSE	No_SigChange	Intergenic	Intergenic	-1137	NM_001126046	Fam178b	0.021244	0.469697	Intergenic	Intergenic	Intergenic	Other
chr1	36691070	36691940	8.3	8.39	8.19	0.2	0.338	0.525	FALSE	No_SigChange	8.18	8.39	7.92	0.47	0.0818	0.151	FALSE	No_SigChange	8	8.19	7.77	0.42	0.0767	0.113	FALSE	No_SigChange	8.12	8.39	7.77	0.62	0.00477	0.00886	TRUE	SigDecrease	promoter-TSS	promoter-TSS (NM_009942)	18	NM_009942	Cox5b	0.0771	0.612644	promoter-TSS	promoter-TSS	promoter-TSS	Other
chr1	36707910	36708280	6.94	7.11	6.76	0.34	0.113	0.245	FALSE	No_SigChange	6.74	7.1	6.25	0.86	0.00261	0.0124	FALSE	No_SigChange	6.31	6.76	5.65	1.11	3.47e-06	2.26e-05	TRUE	SigDecrease	6.55	7.1	5.65	1.45	1.68e-08	1.05e-07	TRUE	SigDecrease	intron	intron (NM_146107, intron 2 of 10)	1830	NM_146107	Actr1b	0.00813	0.537838	intron	intron	intron	Other
chr1	36709240	36710350	9.28	9.43	9.12	0.31	0.109	0.237	FALSE	No_SigChange	9.1	9.43	8.68	0.75	0.00452	0.0186	FALSE	No_SigChange	8.82	9.12	8.44	0.67	0.00357	0.00851	TRUE	SigDecrease	9.02	9.43	8.44	0.99	1.31e-05	4.4e-05	TRUE	SigDecrease	intron	CpG	130	NM_146107	Actr1b	0.054103	0.581982	CpG	CpG	CpG	Other
chr1	36744450	36744850	6.47	6.5	6.45	0.05	0.83	0.907	FALSE	No_SigChange	6.34	6.49	6.16	0.33	0.22	0.318	FALSE	No_SigChange	6.22	6.44	5.95	0.5	0.0431	0.0693	FALSE	No_SigChange	6.25	6.49	5.95	0.55	0.0316	0.0478	FALSE	No_SigChange	exon	non-coding (NR_040290, exon 7 of 9)	-17211	NM_009539	Zap70	0.025063	0.54	non-coding	non-coding	non-coding	Other
chr1	36746630	36746840	5.21	5.07	5.35	-0.28	0.397	0.583	FALSE	No_SigChange	4.83	5.06	4.55	0.51	0.221	0.319	FALSE	No_SigChange	5.24	5.35	5.12	0.23	0.465	0.529	FALSE	No_SigChange	5.09	5.06	5.12	-0.05	0.871	0.893	FALSE	No_SigChange	intron	intron (NR_040290, intron 8 of 8)	-15126	NM_009539	Zap70	0.038278	0.547619	intron	intron	intron	Other
chr1	36758750	36759330	6.4	6.08	6.66	-0.58	0.0323	0.0953	FALSE	No_SigChange	5.9	6.08	5.69	0.38	0.279	0.381	FALSE	No_SigChange	6.5	6.66	6.33	0.33	0.233	0.292	FALSE	No_SigChange	6.21	6.07	6.33	-0.25	0.426	0.484	FALSE	No_SigChange	Intergenic	Intergenic	-2821	NM_009539	Zap70	0.043178	0.55	Intergenic	Intergenic	Intergenic	Other
chr1	36770610	36771640	8.56	8.52	8.6	-0.08	0.694	0.82	FALSE	No_SigChange	8.25	8.52	7.93	0.59	0.0255	0.0646	FALSE	No_SigChange	8.28	8.6	7.88	0.72	0.00328	0.00792	TRUE	SigDecrease	8.23	8.52	7.88	0.63	0.00745	0.0132	FALSE	No_SigChange	exon	exon (NM_001289765, exon 2 of 13)	9264	NM_009539	Zap70	0.050534	0.601942	exon	exon	exon	Other
chr1	36784630	36785750	8.11	8.26	7.94	0.32	0.118	0.252	FALSE	No_SigChange	7.97	8.26	7.62	0.64	0.0133	0.0406	FALSE	No_SigChange	7.58	7.94	7.1	0.83	0.000706	0.00216	TRUE	SigDecrease	7.79	8.26	7.1	1.16	7.07e-07	3.12e-06	TRUE	SigDecrease	Intergenic	Intergenic	23329	NM_009539	Zap70	0.039321	0.516071	Intergenic	Intergenic	Intergenic	Other
chr1	36786430	36786610	4.67	4.49	4.82	-0.33	0.436	0.619	FALSE	No_SigChange	4.4	4.49	4.3	0.19	0.711	0.781	FALSE	No_SigChange	4.84	4.82	4.86	-0.04	0.91	0.927	FALSE	No_SigChange	4.68	4.49	4.86	-0.37	0.404	0.462	FALSE	No_SigChange	Intergenic	B3A|SINE|B2	24659	NM_009539	Zap70	0.027933	0.516667	B3A	B2	SINE	SINE
chr1	36804260	36804630	5.7	5.17	6.09	-0.92	0.00568	0.0247	FALSE	No_SigChange	4.35	5.17	2.25	2.92	2.03e-07	6.63e-06	TRUE	SigDecrease	5.56	6.09	4.71	1.38	1.41e-05	7.56e-05	TRUE	SigDecrease	4.96	5.17	4.71	0.45	0.266	0.32	FALSE	No_SigChange	intron	intron (NM_018872, intron 32 of 40)	42584	NM_009539	Zap70	0.02439	0.567568	intron	intron	intron	Other
chr1	36831070	36831640	6.55	6.27	6.79	-0.53	0.0881	0.203	FALSE	No_SigChange	6.13	6.27	5.98	0.28	0.489	0.589	FALSE	No_SigChange	6.44	6.79	5.98	0.81	0.00213	0.00551	TRUE	SigDecrease	6.13	6.26	5.98	0.28	0.39	0.448	FALSE	No_SigChange	intron	intron (NM_018872, intron 11 of 40)	69494	NM_009539	Zap70	0.017575	0.533333	intron	intron	intron	Other
chr1	36834110	36834400	4.87	3.81	5.48	-1.67	1.46e-05	0.000189	TRUE	SigIncrease	2.91	3.81	0	3.81	6.24e-05	0.000694	TRUE	SigDecrease	4.63	5.47	2.39	3.08	1.54e-11	4.39e-10	TRUE	SigDecrease	3.26	3.8	2.39	1.41	0.0324	0.0489	FALSE	No_SigChange	intron	intron (NM_018872, intron 10 of 40)	72394	NM_009539	Zap70	0.010381	0.475862	intron	intron	intron	Other
chr1	36845030	36845460	6.6	6.39	6.78	-0.39	0.137	0.282	FALSE	No_SigChange	5.97	6.39	5.37	1.02	0.0106	0.0347	FALSE	No_SigChange	6.18	6.78	5.12	1.66	9.21e-11	2.13e-09	TRUE	SigDecrease	5.89	6.39	5.12	1.27	8.68e-05	0.000244	TRUE	SigDecrease	intron	intron (NM_018872, intron 5 of 40)	83384	NM_009539	Zap70	0.016317	0.562791	intron	intron	intron	Other
chr1	36903680	36904110	5.63	4.97	6.08	-1.12	7.41e-05	0.000727	TRUE	SigIncrease	4.68	4.96	4.32	0.64	0.148	0.235	FALSE	No_SigChange	5.84	6.08	5.55	0.53	0.0502	0.0788	FALSE	No_SigChange	5.29	4.96	5.55	-0.59	0.0622	0.0876	FALSE	No_SigChange	intron	intron (NM_018872, intron 1 of 40)	35632	NM_018872	Tmem131	0.032634	0.502326	intron	intron	intron	Other
chr1	36938980	36940380	9.49	9.42	9.56	-0.13	0.503	0.677	FALSE	No_SigChange	9.23	9.42	9.01	0.42	0.103	0.179	FALSE	No_SigChange	9.37	9.55	9.16	0.4	0.0809	0.118	FALSE	No_SigChange	9.29	9.42	9.16	0.27	0.246	0.298	FALSE	No_SigChange	promoter-TSS	promoter-TSS (NM_018872)	-153	NM_018872	Tmem131	0.116512	0.694286	promoter-TSS	promoter-TSS	promoter-TSS	Other
chr1	36943570	36944000	5.45	4.95	5.81	-0.86	0.00764	0.0312	FALSE	No_SigChange	4.79	4.95	4.61	0.34	0.419	0.523	FALSE	No_SigChange	5.3	5.81	4.51	1.3	0.0981	0.139	FALSE	No_SigChange	4.75	4.95	4.51	0.44	0.609	0.659	FALSE	No_SigChange	Intergenic	Intergenic	-4258	NM_018872	Tmem131	0.009324	0.488372	Intergenic	Intergenic	Intergenic	Other
chr1	36982640	36983030	6.36	6.5	6.21	0.29	0.333	0.52	FALSE	No_SigChange	6.34	6.5	6.16	0.34	0.346	0.451	FALSE	No_SigChange	6.51	6.21	6.76	-0.55	0.0376	0.0616	FALSE	No_SigChange	6.64	6.5	6.76	-0.26	0.373	0.431	FALSE	No_SigChange	Intergenic	Intergenic	-43308	NM_018872	Tmem131	0.010283	0.515385	Intergenic	Intergenic	Intergenic	Other
chr1	36983770	36984980	7.21	7.47	6.88	0.59	0.0117	0.0436	FALSE	No_SigChange	7	7.47	6.31	1.16	0.000157	0.00144	TRUE	SigDecrease	6.45	6.88	5.85	1.03	0.00123	0.00345	TRUE	SigDecrease	6.88	7.47	5.85	1.62	8.19e-08	4.41e-07	TRUE	SigDecrease	Intergenic	Intergenic	-44848	NM_018872	Tmem131	0.009926	0.495041	Intergenic	Intergenic	Intergenic	Other
chr1	36985550	36987530	9.29	9.25	9.32	-0.07	0.688	0.817	FALSE	No_SigChange	8.86	9.25	8.32	0.92	0.000183	0.00162	TRUE	SigDecrease	8.98	9.32	8.53	0.79	0.00149	0.00407	TRUE	SigDecrease	8.93	9.25	8.53	0.72	0.00175	0.00361	TRUE	SigDecrease	Intergenic	Intergenic	-47013	NM_018872	Tmem131	0.018191	0.483838	Intergenic	Intergenic	Intergenic	Other
chr1	37001770	37002070	5.22	5.52	4.83	0.69	0.0216	0.0702	FALSE	No_SigChange	5.32	5.52	5.08	0.45	0.207	0.304	FALSE	No_SigChange	4.19	4.83	3	1.83	4.39e-05	0.000201	TRUE	SigDecrease	4.75	5.52	3	2.52	7.73e-10	6.53e-09	TRUE	SigDecrease	Intergenic	RMER10B|LTR|ERVL	-62393	NM_018872	Tmem131	0.010033	0.5	RMER10B	ERVL	LTR	LTR
chr1	37029020	37029640	7.55	7.89	7.11	0.78	0.000804	0.00514	TRUE	SigDecrease	7.44	7.89	6.77	1.12	0.000116	0.00113	TRUE	SigDecrease	6.55	7.11	5.62	1.49	2.45e-08	2.94e-07	TRUE	SigDecrease	7.16	7.89	5.62	2.27	3.47e-16	1.19e-14	TRUE	SigDecrease	Intergenic	CpG	-89803	NM_018872	Tmem131	0.043619	0.567742	CpG	CpG	CpG	Other
chr1	37043070	37043340	4.64	4.63	4.64	-0.01	0.972	0.986	FALSE	No_SigChange	4.17	4.63	3.49	1.14	0.0473	0.101	FALSE	No_SigChange	4.67	4.64	4.7	-0.06	0.882	0.904	FALSE	No_SigChange	4.66	4.63	4.7	-0.07	0.872	0.893	FALSE	No_SigChange	Intergenic	MT2A|LTR|ERVL	-103678	NM_018872	Tmem131	0.011152	0.485185	MT2A	ERVL	LTR	LTR
chr1	37101620	37102150	6.5	6.49	6.5	-0.01	0.961	0.98	FALSE	No_SigChange	6.47	6.49	6.45	0.04	0.891	0.923	FALSE	No_SigChange	6.16	6.5	5.72	0.78	0.00971	0.0197	FALSE	No_SigChange	6.16	6.49	5.72	0.77	0.0125	0.0209	FALSE	No_SigChange	Intergenic	RLTR16B_MM|LTR|ERVK	-117376	NM_009918	Cnga3	0.003781	0.445283	RLTR16B_MM	ERVK	LTR	LTR
chr1	37130160	37130420	5.02	4.58	5.35	-0.76	0.0355	0.102	FALSE	No_SigChange	4.93	4.58	5.21	-0.63	0.125	0.206	FALSE	No_SigChange	5.48	5.35	5.6	-0.25	0.416	0.482	FALSE	No_SigChange	5.18	4.58	5.6	-1.02	0.00288	0.00565	TRUE	SigIncrease	Intergenic	Intergenic	-88971	NM_009918	Cnga3	0.003861	0.484615	Intergenic	Intergenic	Intergenic	Other
chr1	37187040	37187270	4.82	4.58	5.02	-0.44	0.243	0.421	FALSE	No_SigChange	4.76	4.58	4.92	-0.34	0.42	0.524	FALSE	No_SigChange	4.74	5.02	4.39	0.63	0.102	0.144	FALSE	No_SigChange	4.49	4.58	4.39	0.19	0.662	0.707	FALSE	No_SigChange	Intergenic	Intergenic	-32106	NM_009918	Cnga3	0.0131	0.578261	Intergenic	Intergenic	Intergenic	Other
chr1	37212470	37212700	5.09	3.91	5.73	-1.83	0.0177	0.0603	FALSE	No_SigChange	3.66	3.91	3.36	0.55	0.66	0.739	FALSE	No_SigChange	5.47	5.73	5.16	0.57	0.0557	0.086	FALSE	No_SigChange	4.66	3.9	5.16	-1.25	0.0115	0.0195	FALSE	No_SigChange	Intergenic	Intergenic	-6676	NM_009918	Cnga3	0.021834	0.478261	Intergenic	Intergenic	Intergenic	Other
chr1	37218380	37218780	6.4	6.77	5.91	0.87	0.000143	0.00125	TRUE	SigDecrease	6.26	6.77	5.44	1.33	3.83e-06	7.29e-05	TRUE	SigDecrease	5.42	5.9	4.7	1.2	4.36e-05	0.0002	TRUE	SigDecrease	6.08	6.77	4.7	2.07	1.47e-13	2.84e-12	TRUE	SigDecrease	promoter-TSS	promoter-TSS (NM_009918)	-681	NM_009918	Cnga3	0.035088	0.5925	promoter-TSS	promoter-TSS	promoter-TSS	Other
chr1	37246580	37247030	4.92	5.11	4.71	0.39	0.302	0.487	FALSE	No_SigChange	5.58	5.11	5.94	-0.83	0.0287	0.0704	FALSE	No_SigChange	5.42	4.71	5.89	-1.18	0.00152	0.00414	TRUE	SigIncrease	5.55	5.11	5.89	-0.79	0.0195	0.0311	FALSE	No_SigChange	intron	ORR1B1|LTR|ERVL-MaLR	27544	NM_009918	Cnga3	0.004454	0.508889	ORR1B1	ERVL-MaLR	LTR	LTR
chr1	37250510	37250740	4.15	4.44	3.78	0.66	0.147	0.296	FALSE	No_SigChange	4.11	4.44	3.67	0.77	0.0873	0.158	FALSE	No_SigChange	3.28	3.78	2.52	1.26	0.0856	0.124	FALSE	No_SigChange	3.78	4.44	2.52	1.92	0.00201	0.00409	TRUE	SigDecrease	intron	intron (NM_001282010, intron 5 of 7)	31364	NM_009918	Cnga3	0.017467	0.473913	intron	intron	intron	Other
chr1	37272490	37272710	5.44	5.41	5.47	-0.06	0.824	0.903	FALSE	No_SigChange	5.36	5.41	5.3	0.1	0.753	0.816	FALSE	No_SigChange	5.3	5.47	5.12	0.35	0.243	0.303	FALSE	No_SigChange	5.27	5.41	5.12	0.29	0.349	0.406	FALSE	No_SigChange	Intergenic	Intergenic	-27293	NM_030266	Inpp4a	0.022831	0.477273	Intergenic	Intergenic	Intergenic	Other
chr1	37299620	37300440	8.91	8.94	8.89	0.05	0.801	0.89	FALSE	No_SigChange	8.77	8.94	8.59	0.35	0.155	0.243	FALSE	No_SigChange	8.69	8.89	8.46	0.43	0.0818	0.119	FALSE	No_SigChange	8.72	8.93	8.46	0.48	0.0474	0.0687	FALSE	No_SigChange	5'UTR	5' UTR (NM_030266, exon 1 of 26)	137	NM_030266	Inpp4a	0.089133	0.663415	5'UTR	5'UTR	5'UTR	Other
chr1	37307930	37308160	4.81	3.58	5.46	-1.87	4.18e-07	9.25e-06	TRUE	SigIncrease	4.1	3.58	4.48	-0.89	0.048	0.102	FALSE	No_SigChange	5.1	5.46	4.63	0.83	0.031	0.0523	FALSE	No_SigChange	4.2	3.58	4.63	-1.05	0.0393	0.0582	FALSE	No_SigChange	intron	intron (NM_001290797, intron 1 of 25)	8152	NM_030266	Inpp4a	0.0131	0.565217	intron	intron	intron	Other
chr1	37401830	37402480	7.08	7.02	7.14	-0.12	0.541	0.708	FALSE	No_SigChange	6.62	7.02	6.07	0.95	0.000325	0.00253	TRUE	SigDecrease	6.54	7.14	5.5	1.64	7.21e-09	1.01e-07	TRUE	SigDecrease	6.45	7.02	5.5	1.52	4.84e-08	2.74e-07	TRUE	SigDecrease	intron	intron (NM_001290797, intron 25 of 25)	27948	NM_198006	Coa5	0.029276	0.54	intron	intron	intron	Other
chr1	37409760	37410050	5.26	5.45	5.03	0.42	0.189	0.352	FALSE	No_SigChange	5.28	5.45	5.09	0.36	0.266	0.368	FALSE	No_SigChange	4.69	5.03	4.25	0.78	0.0373	0.0611	FALSE	No_SigChange	4.97	5.45	4.25	1.2	0.000587	0.00136	TRUE	SigDecrease	3'UTR	3' UTR (NM_030266, exon 26 of 26)	20198	NM_198006	Coa5	0	0.496552	3'UTR	3'UTR	3'UTR	Other
chr1	37419510	37419830	5.96	5.92	5.99	-0.07	0.797	0.887	FALSE	No_SigChange	5.6	5.92	5.18	0.74	0.017	0.0483	FALSE	No_SigChange	5.87	5.99	5.73	0.26	0.334	0.399	FALSE	No_SigChange	5.83	5.92	5.73	0.2	0.485	0.542	FALSE	No_SigChange	3'UTR	3' UTR (NM_198006, exon 3 of 3)	10433	NM_198006	Coa5	0	0.509375	3'UTR	3'UTR	3'UTR	Other
chr1	37429480	37430580	8.89	8.9	8.88	0.02	0.911	0.953	FALSE	No_SigChange	8.7	8.9	8.47	0.43	0.0693	0.133	FALSE	No_SigChange	8.6	8.88	8.25	0.63	0.013	0.0251	FALSE	No_SigChange	8.61	8.9	8.25	0.65	0.00561	0.0103	FALSE	No_SigChange	promoter-TSS	promoter-TSS (NM_026123)	73	NM_198006	Coa5	0.072793	0.603636	promoter-TSS	promoter-TSS	promoter-TSS	Other
chr1	37540420	37541520	9.36	9.36	9.37	0	0.994	0.998	FALSE	No_SigChange	9.14	9.36	8.88	0.49	0.0584	0.117	FALSE	No_SigChange	9.14	9.36	8.89	0.48	0.0491	0.0774	FALSE	No_SigChange	9.14	9.36	8.89	0.48	0.0458	0.0667	FALSE	No_SigChange	Intergenic	promoter-TSS (NM_173870)	-4711	NM_173870	Mgat4a	0.094631	0.709091	promoter-TSS	promoter-TSS	promoter-TSS	Other
chr1	37579330	37580060	5.92	0	6.91	-6.91	2.6e-19	2.03e-16	TRUE	SigIncrease	2.93	0	3.83	-3.83	3.57e-05	0.000444	TRUE	SigIncrease	7.19	6.9	7.43	-0.53	0.0528	0.0823	FALSE	No_SigChange	6.44	0	7.43	-7.43	2.3e-22	2.97e-20	TRUE	SigIncrease	Intergenic	Intergenic	-43436	NM_173870	Mgat4a	0.026063	0.50137	Intergenic	Intergenic	Intergenic	Other
chr1	37634680	37634900	5.17	5.47	4.81	0.66	0.036	0.104	FALSE	No_SigChange	5.12	5.47	4.66	0.81	0.0298	0.0721	FALSE	No_SigChange	4.77	4.8	4.74	0.06	0.863	0.889	FALSE	No_SigChange	5.15	5.47	4.74	0.72	0.031	0.0471	FALSE	No_SigChange	intron	B2_Mm2|SINE|B2	85021	NM_028096	2010300C02Rik	0.013699	0.504545	B2_Mm2	B2	SINE	SINE
chr1	37635850	37636540	6.3	6.01	6.55	-0.55	0.0183	0.0618	FALSE	No_SigChange	6.39	6	6.69	-0.69	0.0148	0.0437	FALSE	No_SigChange	6.48	6.55	6.41	0.14	0.539	0.599	FALSE	No_SigChange	6.22	6	6.41	-0.41	0.117	0.155	FALSE	No_SigChange	intron	intron (NM_028096, intron 3 of 9)	83616	NM_028096	2010300C02Rik	0.01016	0.502899	intron	intron	intron	Other
chr1	37639160	37639570	6.44	6.37	6.5	-0.13	0.567	0.729	FALSE	No_SigChange	6.31	6.37	6.25	0.12	0.665	0.744	FALSE	No_SigChange	6.4	6.5	6.28	0.22	0.412	0.478	FALSE	No_SigChange	6.33	6.37	6.28	0.08	0.764	0.799	FALSE	No_SigChange	intron	intron (NM_028096, intron 2 of 9)	80446	NM_028096	2010300C02Rik	0.01467	0.502439	intron	intron	intron	Other
chr1	37666560	37666830	5.11	5.75	3.93	1.82	1.96e-07	4.83e-06	TRUE	SigDecrease	5.44	5.75	5.04	0.71	0.0717	0.137	FALSE	No_SigChange	3.67	3.93	3.36	0.57	0.237	0.296	FALSE	No_SigChange	5	5.75	3.36	2.4	2.3e-09	1.74e-08	TRUE	SigDecrease	intron	intron (NM_028096, intron 1 of 9)	53116	NM_028096	2010300C02Rik	0.022305	0.574074	intron	intron	intron	Other
chr1	37675430	37675860	5.97	5.79	6.13	-0.34	0.186	0.348	FALSE	No_SigChange	5.9	5.79	6.01	-0.22	0.5	0.599	FALSE	No_SigChange	5.95	6.13	5.74	0.39	0.186	0.241	FALSE	No_SigChange	5.76	5.79	5.74	0.05	0.883	0.903	FALSE	No_SigChange	intron	intron (NM_028096, intron 1 of 9)	44166	NM_028096	2010300C02Rik	0.013986	0.553488	intron	intron	intron	Other
chr1	37678400	37678770	6.23	6.11	6.33	-0.23	0.392	0.578	FALSE	No_SigChange	5.93	6.11	5.73	0.37	0.179	0.272	FALSE	No_SigChange	5.96	6.33	5.44	0.89	0.00214	0.00553	TRUE	SigDecrease	5.81	6.11	5.44	0.66	0.0208	0.033	FALSE	No_SigChange	intron	intron (NM_028096, intron 1 of 9)	41226	NM_028096	2010300C02Rik	0.00813	0.548649	intron	intron	intron	Other
chr1	37691090	37691610	6.31	6.18	6.44	-0.26	0.309	0.494	FALSE	No_SigChange	6.24	6.18	6.29	-0.11	0.681	0.756	FALSE	No_SigChange	6.14	6.44	5.77	0.66	0.0115	0.0227	FALSE	No_SigChange	5.99	6.18	5.77	0.4	0.135	0.175	FALSE	No_SigChange	intron	L2a|LINE|L2	28461	NM_028096	2010300C02Rik	0.017341	0.473077	L2a	L2	LINE	LINE
chr1	37694380	37694860	6.05	5.83	6.23	-0.4	0.159	0.312	FALSE	No_SigChange	5.49	5.83	5.05	0.78	0.052	0.108	FALSE	No_SigChange	5.69	6.23	4.81	1.42	1.1e-06	8.27e-06	TRUE	SigDecrease	5.41	5.83	4.81	1.02	0.0023	0.00462	TRUE	SigDecrease	intron	intron (NM_028096, intron 1 of 9)	25191	NM_028096	2010300C02Rik	0.018789	0.552083	intron	intron	intron	Other
chr1	37702420	37702660	5.4	5.86	4.7	1.16	0.00172	0.00949	TRUE	SigDecrease	5.37	5.86	4.63	1.23	0.00299	0.0137	FALSE	No_SigChange	4.31	4.7	3.78	0.92	0.0426	0.0685	FALSE	No_SigChange	5.17	5.86	3.78	2.08	4.13e-07	1.91e-06	TRUE	SigDecrease	intron	intron (NM_028096, intron 1 of 9)	17271	NM_028096	2010300C02Rik	0.012552	0.566667	intron	intron	intron	Other
chr1	37719250	37720580	8.44	8.3	8.56	-0.26	0.178	0.338	FALSE	No_SigChange	8.27	8.3	8.25	0.05	0.864	0.902	FALSE	No_SigChange	8.4	8.56	8.22	0.34	0.213	0.27	FALSE	No_SigChange	8.26	8.3	8.22	0.07	0.782	0.815	FALSE	No_SigChange	promoter-TSS	promoter-TSS (NM_028096)	-104	NM_028096	2010300C02Rik	0.087284	0.676692	promoter-TSS	promoter-TSS	promoter-TSS	Other
chr1	37864470	37865620	10.17	10.24	10.11	0.13	0.502	0.676	FALSE	No_SigChange	10.03	10.23	9.79	0.44	0.0713	0.136	FALSE	No_SigChange	9.86	10.1	9.56	0.54	0.0185	0.0339	FALSE	No_SigChange	9.94	10.23	9.56	0.67	0.000541	0.00127	TRUE	SigDecrease	promoter-TSS	promoter-TSS (NM_207228)	34	NM_207228	Tsga10	0.085292	0.673913	promoter-TSS	promoter-TSS	promoter-TSS	Other
chr1	37867070	37867450	6.07	6.2	5.92	0.28	0.359	0.547	FALSE	No_SigChange	6.07	6.2	5.92	0.28	0.352	0.457	FALSE	No_SigChange	5.75	5.92	5.55	0.38	0.215	0.272	FALSE	No_SigChange	5.91	6.2	5.55	0.66	0.0327	0.0493	FALSE	No_SigChange	Intergenic	B3|SINE|B2	-2181	NM_207228	Tsga10	0.002639	0.4	B3	B2	SINE	SINE
chr1	37871780	37872690	8.35	8.45	8.23	0.22	0.254	0.434	FALSE	No_SigChange	8.21	8.45	7.91	0.54	0.0712	0.136	FALSE	No_SigChange	7.88	8.23	7.42	0.81	0.00193	0.00507	TRUE	SigDecrease	8.03	8.45	7.42	1.03	6.22e-05	0.000181	TRUE	SigDecrease	promoter-TSS	promoter-TSS (NM_001037918)	29	NM_001037918	Lipt1	0.038504	0.505495	promoter-TSS	promoter-TSS	promoter-TSS	Other
chr1	37889880	37890710	7.68	7.7	7.66	0.04	0.848	0.918	FALSE	No_SigChange	7.5	7.7	7.28	0.42	0.115	0.194	FALSE	No_SigChange	7.47	7.66	7.25	0.41	0.107	0.15	FALSE	No_SigChange	7.49	7.7	7.25	0.45	0.0555	0.0791	FALSE	No_SigChange	promoter-TSS	promoter-TSS (NM_027098)	116	NM_026913	Mitd1	0.055489	0.514458	promoter-TSS	promoter-TSS	promoter-TSS	Other
chr1	37900210	37900740	6.11	6.56	5.46	1.1	0.000179	0.0015	TRUE	SigDecrease	6.16	6.56	5.61	0.95	0.0012	0.0069	TRUE	SigDecrease	4.67	5.46	2.81	2.65	5.76e-09	8.27e-08	TRUE	SigDecrease	5.66	6.56	2.81	3.75	6.43e-23	9.29e-21	TRUE	SigDecrease	Intergenic	ORR1B1|LTR|ERVL-MaLR	9922	NM_027098	Mrpl30	0.013233	0.498113	ORR1B1	ERVL-MaLR	LTR	LTR
chr1	37931790	37932180	7.76	7.88	7.63	0.25	0.257	0.437	FALSE	No_SigChange	7.57	7.88	7.17	0.7	0.00273	0.0128	FALSE	No_SigChange	7.02	7.62	5.98	1.65	2.85e-11	7.58e-10	TRUE	SigDecrease	7.22	7.88	5.98	1.9	6.82e-16	2.2e-14	TRUE	SigDecrease	Intergenic	Intergenic	-15492	NM_001033427	Lyg2	0.010283	0.525641	Intergenic	Intergenic	Intergenic	Other
chr1	37934190	37934550	5.15	4.48	5.61	-1.13	0.00156	0.00879	TRUE	SigIncrease	4.31	4.47	4.13	0.35	0.443	0.546	FALSE	No_SigChange	5.19	5.6	4.61	0.99	0.00378	0.00892	TRUE	SigDecrease	4.55	4.47	4.61	-0.14	0.752	0.789	FALSE	No_SigChange	Intergenic	MTA_Mm|LTR|ERVL-MaLR	-17877	NM_001033427	Lyg2	0.008357	0.511111	MTA_Mm	ERVL-MaLR	LTR	LTR
chr1	37959750	37959910	4.27	3.58	4.73	-1.14	0.00428	0.0197	FALSE	No_SigChange	3.17	3.58	2.58	1	0.118	0.198	FALSE	No_SigChange	3.88	4.73	1.58	3.14	9e-08	9.25e-07	TRUE	SigDecrease	2.9	3.58	1.58	2	0.00686	0.0123	FALSE	No_SigChange	Intergenic	Intergenic	-2071	NM_027111	Lyg1	0.012579	0.45	Intergenic	Intergenic	Intergenic	Other
chr1	37965610	37966050	6.16	5.49	6.62	-1.13	5.3e-06	8.02e-05	TRUE	SigIncrease	5.61	5.49	5.71	-0.22	0.44	0.543	FALSE	No_SigChange	6.52	6.62	6.42	0.2	0.429	0.494	FALSE	No_SigChange	6.03	5.49	6.42	-0.93	0.000627	0.00144	TRUE	SigIncrease	Intergenic	Intergenic	-8071	NM_027111	Lyg1	0.020501	0.536364	Intergenic	Intergenic	Intergenic	Other
chr1	37985680	37986380	7.07	6.76	7.33	-0.56	0.00604	0.0259	FALSE	No_SigChange	6.43	6.76	6.01	0.75	0.00728	0.0263	FALSE	No_SigChange	6.98	7.32	6.53	0.8	0.000228	0.000828	TRUE	SigDecrease	6.65	6.76	6.53	0.23	0.316	0.373	FALSE	No_SigChange	3'UTR	3' UTR (NM_172054, exon 5 of 5)	11178	NM_172054	Txndc9	0.014306	0.497143	3'UTR	3'UTR	3'UTR	Other
chr1	37996690	37998680	10.25	10.3	10.19	0.12	0.552	0.717	FALSE	No_SigChange	10.08	10.3	9.8	0.5	0.0647	0.127	FALSE	No_SigChange	9.93	10.18	9.62	0.56	0.0206	0.0371	FALSE	No_SigChange	10	10.3	9.62	0.68	0.00376	0.00716	TRUE	SigDecrease	promoter-TSS	promoter-TSS (NM_172054)	-325	NM_198303	Eif5b	0.07994	0.604523	promoter-TSS	promoter-TSS	promoter-TSS	Other
chr1	38058540	38058780	5.67	5.13	6.05	-0.93	0.0016	0.00895	TRUE	SigIncrease	4.56	5.13	3.61	1.51	0.0739	0.14	FALSE	No_SigChange	5.68	6.05	5.17	0.88	0.000587	0.00185	TRUE	SigDecrease	5.15	5.13	5.17	-0.04	0.902	0.919	FALSE	No_SigChange	intron	intron (NM_019570, intron 14 of 22)	60650	NM_198303	Eif5b	0.016736	0.525	intron	intron	intron	Other
chr1	38128430	38130490	9.99	9.94	10.03	-0.1	0.601	0.754	FALSE	No_SigChange	9.75	9.94	9.54	0.4	0.128	0.21	FALSE	No_SigChange	9.78	10.03	9.47	0.56	0.0145	0.0275	FALSE	No_SigChange	9.72	9.94	9.47	0.47	0.0282	0.0432	FALSE	No_SigChange	intron	CpG	202	NM_019570	Rev1	0.102963	0.645631	CpG	CpG	CpG	Other
chr1	38131060	38131430	5.6	5.55	5.65	-0.1	0.736	0.849	FALSE	No_SigChange	5.65	5.55	5.75	-0.19	0.517	0.615	FALSE	No_SigChange	5.55	5.65	5.43	0.21	0.469	0.533	FALSE	No_SigChange	5.49	5.55	5.43	0.12	0.667	0.712	FALSE	No_SigChange	Intergenic	MTD|LTR|ERVL-MaLR	-1583	NM_019570	Rev1	0.01084	0.475676	MTD	ERVL-MaLR	LTR	LTR
chr1	38132850	38133320	6.58	6.18	6.89	-0.71	0.0131	0.0477	FALSE	No_SigChange	5.89	6.18	5.52	0.66	0.0337	0.0788	FALSE	No_SigChange	6.74	6.88	6.57	0.31	0.264	0.325	FALSE	No_SigChange	6.39	6.18	6.57	-0.4	0.13	0.169	FALSE	No_SigChange	Intergenic	RLTR12BD_Mm|LTR|ERVK	-3423	NM_019570	Rev1	0.017058	0.444681	RLTR12BD_Mm	ERVK	LTR	LTR
chr1	38185660	38185960	5.37	5.41	5.34	0.07	0.809	0.895	FALSE	No_SigChange	5.24	5.41	5.04	0.36	0.286	0.389	FALSE	No_SigChange	5.12	5.34	4.87	0.47	0.138	0.186	FALSE	No_SigChange	5.16	5.41	4.87	0.54	0.0897	0.122	FALSE	No_SigChange	intron	intron (NM_001290814, intron 18 of 21)	-56148	NM_019570	Rev1	0.023411	0.436667	intron	intron	intron	Other
chr1	38202930	38203200	5.01	5.61	3.95	1.65	5.92e-07	1.25e-05	TRUE	SigDecrease	5.21	5.61	4.66	0.95	0.00382	0.0165	FALSE	No_SigChange	3.7	3.95	3.39	0.56	0.308	0.372	FALSE	No_SigChange	4.89	5.6	3.39	2.21	4.81e-07	2.19e-06	TRUE	SigDecrease	intron	intron (NM_001290814, intron 15 of 21)	-73403	NM_019570	Rev1	0.003717	0.492593	intron	intron	intron	Other
chr1	38209930	38210450	5.88	6.49	4.82	1.67	4.04e-08	1.25e-06	TRUE	SigDecrease	6.2	6.49	5.83	0.65	0.0114	0.0364	FALSE	No_SigChange	4.2	4.82	3.09	1.73	0.00127	0.00355	TRUE	SigDecrease	5.62	6.49	3.09	3.4	9.14e-18	4.4e-16	TRUE	SigDecrease	exon	exon (NM_001290814, exon 12 of 22)	-80528	NM_019570	Rev1	0.065511	0.65	exon	exon	exon	Other
chr1	38218250	38218480	4.98	4.95	5.01	-0.06	0.868	0.929	FALSE	No_SigChange	4.51	4.95	3.86	1.09	0.0111	0.0357	FALSE	No_SigChange	4.45	5.01	3.52	1.49	0.00219	0.00563	TRUE	SigDecrease	4.41	4.95	3.52	1.43	0.00849	0.0148	FALSE	No_SigChange	exon	exon (NM_001290814, exon 11 of 22)	-88703	NM_019570	Rev1	0.074236	0.686957	exon	exon	exon	Other
chr1	38252890	38253080	4.47	3.29	5.11	-1.82	3.78e-05	0.000416	TRUE	SigIncrease	3.23	3.28	3.17	0.11	0.877	0.912	FALSE	No_SigChange	4.82	5.11	4.47	0.63	0.111	0.155	FALSE	No_SigChange	4	3.28	4.47	-1.19	0.027	0.0416	FALSE	No_SigChange	intron	intron (NM_001290814, intron 9 of 21)	-123323	NM_019570	Rev1	0.005291	0.410526	intron	intron	intron	Other
chr1	38291700	38291870	3.94	2.7	4.6	-1.9	0.000174	0.00147	TRUE	SigIncrease	2.04	2.7	0.81	1.89	0.0583	0.117	FALSE	No_SigChange	4.3	4.6	3.93	0.67	0.108	0.151	FALSE	No_SigChange	3.44	2.7	3.93	-1.23	0.0505	0.0727	FALSE	No_SigChange	intron	intron (NM_001290814, intron 8 of 21)	-162123	NM_019570	Rev1	0.005917	0.423529	intron	intron	intron	Other
chr1	38307230	38307600	4.61	3.58	5.21	-1.62	0.000151	0.0013	TRUE	SigIncrease	3.79	3.58	3.98	-0.39	0.502	0.601	FALSE	No_SigChange	5.34	5.21	5.47	-0.26	0.4	0.465	FALSE	No_SigChange	4.81	3.58	5.47	-1.88	2.94e-05	9.2e-05	TRUE	SigIncrease	intron	B3|SINE|B2	-177753	NM_019570	Rev1	0.02981	0.478378	B3	B2	SINE	SINE
chr1	38307630	38307790	2.78	0	3.67	-3.67	8.09e-05	0.000782	TRUE	SigIncrease	1.52	0	2.25	-2.25	0.0589	0.118	FALSE	No_SigChange	3.68	3.67	3.7	-0.03	0.95	0.96	FALSE	No_SigChange	2.81	0	3.7	-3.7	6.57e-05	0.00019	TRUE	SigIncrease	intron	intron (NM_001290814, intron 8 of 21)	-178048	NM_019570	Rev1	0.018868	0.3625	intron	intron	intron	Other
chr1	38315410	38315740	3.7	1.91	4.48	-2.57	1.67e-05	0.000211	TRUE	SigIncrease	1.81	1.91	1.7	0.21	0.847	0.889	FALSE	No_SigChange	4.68	4.47	4.87	-0.4	0.264	0.325	FALSE	No_SigChange	4.04	1.9	4.87	-2.96	1.27e-07	6.59e-07	TRUE	SigIncrease	intron	intron (NM_001290814, intron 8 of 21)	-185913	NM_019570	Rev1	0.024316	0.5	intron	intron	intron	Other
chr1	38330610	38330830	3	2.64	3.29	-0.64	0.39	0.577	FALSE	No_SigChange	2.67	2.64	2.7	-0.06	0.944	0.961	FALSE	No_SigChange	4.85	3.28	5.58	-2.3	2.81e-09	4.38e-08	TRUE	SigIncrease	4.76	2.64	5.58	-2.94	0.000201	0.00052	TRUE	SigIncrease	intron	RMER6A|LTR|ERVK	-201058	NM_019570	Rev1	0.009132	0.440909	RMER6A	ERVK	LTR	LTR
chr1	38393690	38393860	5.18	5.31	5.04	0.27	0.358	0.546	FALSE	No_SigChange	4.96	5.31	4.51	0.8	0.0318	0.0756	FALSE	No_SigChange	4.47	5.04	3.52	1.52	0.00201	0.00524	TRUE	SigDecrease	4.68	5.31	3.52	1.79	0.000221	0.000568	TRUE	SigDecrease	intron	intron (NM_001290814, intron 5 of 21)	-264113	NM_019570	Rev1	0.011834	0.576471	intron	intron	intron	Other
chr1	38394640	38394840	5.31	4.67	5.75	-1.08	0.000231	0.00185	TRUE	SigIncrease	4.58	4.67	4.48	0.2	0.617	0.702	FALSE	No_SigChange	5.4	5.75	4.94	0.8	0.00561	0.0124	FALSE	No_SigChange	4.81	4.67	4.94	-0.27	0.436	0.494	FALSE	No_SigChange	intron	intron (NM_001290814, intron 5 of 21)	-265078	NM_019570	Rev1	0.01005	0.595	intron	intron	intron	Other
chr1	38430240	38430770	6.01	5.67	6.29	-0.62	0.0169	0.0582	FALSE	No_SigChange	5.29	5.66	4.78	0.88	0.00788	0.0279	FALSE	No_SigChange	6.37	6.29	6.45	-0.16	0.539	0.6	FALSE	No_SigChange	6.11	5.66	6.45	-0.78	0.00139	0.00294	TRUE	SigIncrease	intron	intron (NM_001290814, intron 4 of 21)	234450	NM_010678	Aff3	0.024575	0.554717	intron	intron	intron	Other
chr1	38433130	38433390	5.6	5.89	5.25	0.64	0.0224	0.072	FALSE	No_SigChange	5.14	5.89	3.52	2.36	2.46e-07	7.78e-06	TRUE	SigDecrease	4.35	5.25	1.46	3.79	9.24e-12	2.81e-10	TRUE	SigDecrease	4.95	5.89	1.46	4.43	7.15e-16	2.3e-14	TRUE	SigDecrease	intron	intron (NM_001290814, intron 4 of 21)	231695	NM_010678	Aff3	0	0.503846	intron	intron	intron	Other
chr1	38467460	38467730	5.25	5.02	5.45	-0.43	0.125	0.263	FALSE	No_SigChange	4.56	5.02	3.88	1.14	0.00524	0.0207	FALSE	No_SigChange	4.89	5.45	3.98	1.47	0.000204	0.000752	TRUE	SigDecrease	4.59	5.02	3.98	1.04	0.0176	0.0284	FALSE	No_SigChange	intron	intron (NM_001290814, intron 4 of 21)	197360	NM_010678	Aff3	0.01487	0.488889	intron	intron	intron	Other
chr1	38501230	38501570	4.56	2.09	5.43	-3.34	1.05e-11	9.71e-10	TRUE	SigIncrease	2.52	2.09	2.86	-0.77	0.392	0.497	FALSE	No_SigChange	5.22	5.42	4.98	0.45	0.133	0.181	FALSE	No_SigChange	4.16	2.09	4.98	-2.89	8.83e-08	4.72e-07	TRUE	SigIncrease	intron	intron (NM_001290814, intron 4 of 21)	163555	NM_010678	Aff3	0.014749	0.473529	intron	intron	intron	Other
chr1	38503500	38503840	5.35	4.29	5.95	-1.67	3.87e-06	6.16e-05	TRUE	SigIncrease	4.16	4.28	4.02	0.26	0.572	0.664	FALSE	No_SigChange	5.47	5.95	4.74	1.21	0.000245	0.000881	TRUE	SigDecrease	4.53	4.28	4.74	-0.46	0.286	0.341	FALSE	No_SigChange	intron	intron (NM_001290814, intron 4 of 21)	161285	NM_010678	Aff3	0.032448	0.491176	intron	intron	intron	Other
chr1	38601740	38601920	4.55	4	4.95	-0.95	0.0166	0.0573	FALSE	No_SigChange	3.47	4	2.64	1.35	0.0167	0.0477	FALSE	No_SigChange	4.05	4.95	1.17	3.78	3.33e-09	5.11e-08	TRUE	SigDecrease	3.19	4	1.17	2.83	0.00015	0.0004	TRUE	SigDecrease	intron	intron (NM_001290814, intron 1 of 21)	63125	NM_010678	Aff3	0.03352	0.488889	intron	intron	intron	Other
chr1	38606890	38607050	4.76	4.85	4.67	0.17	0.824	0.904	FALSE	No_SigChange	4.36	4.84	3.61	1.23	0.0274	0.068	FALSE	No_SigChange	3.78	4.67	1	3.67	2.31e-07	2.1e-06	TRUE	SigDecrease	3.94	4.84	1	3.84	7.45e-07	3.28e-06	TRUE	SigDecrease	intron	intron (NM_001290814, intron 1 of 21)	57985	NM_010678	Aff3	0.006289	0.53125	intron	intron	intron	Other
chr1	38620650	38621260	6.87	6.46	7.18	-0.72	0.0127	0.0465	FALSE	No_SigChange	6.55	6.46	6.64	-0.19	0.577	0.668	FALSE	No_SigChange	7.03	7.18	6.87	0.31	0.22	0.278	FALSE	No_SigChange	6.68	6.46	6.87	-0.41	0.18	0.226	FALSE	No_SigChange	intron	intron (NM_001290814, intron 1 of 21)	44000	NM_010678	Aff3	0.021346	0.488525	intron	intron	intron	Other
chr1	38621630	38622290	7.01	6.97	7.05	-0.08	0.728	0.843	FALSE	No_SigChange	6.6	6.97	6.11	0.86	0.00552	0.0215	FALSE	No_SigChange	6.55	7.05	5.78	1.27	4.59e-06	2.87e-05	TRUE	SigDecrease	6.49	6.97	5.78	1.19	0.00017	0.000447	TRUE	SigDecrease	intron	BGLII_B|LTR|ERVK	42995	NM_010678	Aff3	0.015175	0.463636	BGLII_B	ERVK	LTR	LTR
chr1	38626400	38628660	9.55	9.51	9.59	-0.08	0.705	0.828	FALSE	No_SigChange	9.28	9.51	9.01	0.5	0.0853	0.155	FALSE	No_SigChange	9.26	9.59	8.82	0.77	0.00285	0.00705	TRUE	SigDecrease	9.21	9.51	8.82	0.69	0.00946	0.0163	FALSE	No_SigChange	intron	promoter-TSS (NM_001290814)	37425	NM_010678	Aff3	0.085436	0.669469	promoter-TSS	promoter-TSS	promoter-TSS	Other
chr1	38628940	38629580	6.43	6.68	6.13	0.55	0.0354	0.102	FALSE	No_SigChange	6.36	6.68	5.94	0.75	0.00961	0.0322	FALSE	No_SigChange	5.56	6.13	4.6	1.53	0.00693	0.0148	FALSE	No_SigChange	5.99	6.68	4.6	2.08	1.47e-07	7.51e-07	TRUE	SigDecrease	intron	Intergenic	35695	NM_010678	Aff3	0.017214	0.496875	Intergenic	Intergenic	Intergenic	Other
chr1	38630880	38631780	6.89	7.3	6.34	0.96	0.000735	0.00479	TRUE	SigDecrease	6.63	7.3	5.35	1.95	0.0149	0.044	FALSE	No_SigChange	5.6	6.33	4.04	2.29	0.00112	0.0032	TRUE	SigDecrease	6.44	7.29	4.04	3.25	1.93e-05	6.28e-05	TRUE	SigDecrease	intron	Intergenic	33625	NM_010678	Aff3	0.005562	0.503333	Intergenic	Intergenic	Intergenic	Other
chr1	38655170	38655570	5.76	5.55	5.95	-0.41	0.17	0.328	FALSE	No_SigChange	5.75	5.55	5.94	-0.39	0.221	0.319	FALSE	No_SigChange	6.12	5.95	6.27	-0.31	0.286	0.349	FALSE	No_SigChange	5.95	5.54	6.27	-0.72	0.0195	0.0311	FALSE	No_SigChange	intron	Intergenic	9585	NM_010678	Aff3	0.007519	0.515	Intergenic	Intergenic	Intergenic	Other
chr1	38720320	38720740	5.58	4.81	6.08	-1.27	0.000124	0.00111	TRUE	SigIncrease	5.16	4.81	5.44	-0.64	0.097	0.171	FALSE	No_SigChange	5.65	6.07	5.04	1.03	0.000837	0.0025	TRUE	SigDecrease	4.93	4.8	5.04	-0.24	0.568	0.621	FALSE	No_SigChange	Intergenic	Intergenic	-55575	NM_010678	Aff3	0.019093	0.497619	Intergenic	Intergenic	Intergenic	Other
chr1	38766990	38767420	6.16	5.79	6.46	-0.66	0.0201	0.0665	FALSE	No_SigChange	5.55	5.79	5.25	0.55	0.0844	0.154	FALSE	No_SigChange	6.09	6.46	5.59	0.87	0.00207	0.00537	TRUE	SigDecrease	5.7	5.79	5.59	0.2	0.497	0.553	FALSE	No_SigChange	Intergenic	Intergenic	54010	NM_001029878	Lonrf2	0.025641	0.548837	Intergenic	Intergenic	Intergenic	Other
chr1	38770040	38770360	5.96	5.37	6.37	-1	0.000166	0.00141	TRUE	SigIncrease	5.28	5.37	5.18	0.19	0.649	0.73	FALSE	No_SigChange	6.3	6.37	6.21	0.16	0.577	0.635	FALSE	No_SigChange	5.85	5.37	6.21	-0.84	0.00777	0.0137	FALSE	No_SigChange	Intergenic	Intergenic	51015	NM_001029878	Lonrf2	0.018809	0.54375	Intergenic	Intergenic	Intergenic	Other
chr1	38787460	38787820	5.68	5.71	5.65	0.06	0.813	0.897	FALSE	No_SigChange	5.72	5.71	5.73	-0.01	0.956	0.97	FALSE	No_SigChange	5.71	5.65	5.77	-0.12	0.693	0.741	FALSE	No_SigChange	5.74	5.71	5.77	-0.06	0.846	0.871	FALSE	No_SigChange	Intergenic	Intergenic	33575	NM_001029878	Lonrf2	0.013928	0.530556	Intergenic	Intergenic	Intergenic	Other
chr1	38796940	38797170	5.15	4.83	5.41	-0.58	0.0589	0.151	FALSE	No_SigChange	3.88	4.83	0	4.83	7.13e-09	4.18e-07	TRUE	SigDecrease	4.6	5.41	2.58	2.82	3.1e-10	6.29e-09	TRUE	SigDecrease	4.11	4.83	2.58	2.25	9.39e-06	3.27e-05	TRUE	SigDecrease	3'UTR	3' UTR (NM_001029878, exon 11 of 11)	24160	NM_001029878	Lonrf2	0.021834	0.426087	3'UTR	3'UTR	3'UTR	Other
chr1	38799380	38799570	4.82	4.51	5.08	-0.57	0.123	0.259	FALSE	No_SigChange	4.5	4.51	4.49	0.01	0.975	0.983	FALSE	No_SigChange	4.89	5.07	4.67	0.4	0.243	0.303	FALSE	No_SigChange	4.59	4.51	4.67	-0.17	0.676	0.72	FALSE	No_SigChange	intron	MLT1D|LTR|ERVL-MaLR	21740	NM_001029878	Lonrf2	0.010582	0.557895	MLT1D	ERVL-MaLR	LTR	LTR
chr1	38824080	38824280	4.96	4.51	5.3	-0.8	0.0188	0.063	FALSE	No_SigChange	4.12	4.51	3.58	0.92	0.0423	0.0929	FALSE	No_SigChange	4.73	5.3	3.78	1.52	0.000442	0.00145	TRUE	SigDecrease	4.19	4.51	3.78	0.73	0.145	0.187	FALSE	No_SigChange	Intergenic	RodERV21-int|LTR|ERV1	-2965	NM_001029878	Lonrf2	0	0.46	RodERV21-int	ERV1	LTR	LTR
chr1	38834920	38837000	8.84	8.62	9.02	-0.4	0.0529	0.139	FALSE	No_SigChange	8.32	8.62	7.93	0.69	0.0129	0.0396	FALSE	No_SigChange	8.6	9.02	8	1.02	0.000354	0.00121	TRUE	SigDecrease	8.34	8.62	8	0.62	0.035	0.0525	FALSE	No_SigChange	Intergenic	CpG	-14745	NM_001029878	Lonrf2	0.074555	0.594231	CpG	CpG	CpG	Other
chr1	38856360	38856600	5.21	4.92	5.46	-0.54	0.0888	0.204	FALSE	No_SigChange	4.71	4.92	4.46	0.46	0.222	0.32	FALSE	No_SigChange	5.16	5.46	4.78	0.68	0.0556	0.086	FALSE	No_SigChange	4.85	4.92	4.78	0.14	0.719	0.759	FALSE	No_SigChange	Intergenic	Intergenic	-35265	NM_001029878	Lonrf2	0.012552	0.45	Intergenic	Intergenic	Intergenic	Other
chr1	38869200	38869830	7.05	7.12	6.97	0.15	0.517	0.688	FALSE	No_SigChange	6.84	7.12	6.49	0.63	0.0387	0.0871	FALSE	No_SigChange	6.58	6.97	6.04	0.93	0.000591	0.00186	TRUE	SigDecrease	6.68	7.12	6.04	1.08	2.53e-05	8.04e-05	TRUE	SigDecrease	intron	intron (NM_145142, intron 5 of 6)	28645	NM_145142	Chst10	0.017488	0.520635	intron	intron	intron	Other
chr1	38897300	38898230	8.5	8.48	8.52	-0.04	0.848	0.918	FALSE	No_SigChange	8.28	8.48	8.05	0.43	0.133	0.217	FALSE	No_SigChange	8.23	8.52	7.88	0.64	0.0165	0.0308	FALSE	No_SigChange	8.21	8.48	7.88	0.6	0.0184	0.0296	FALSE	No_SigChange	intron	intron (NM_145142, intron 1 of 6)	395	NM_145142	Chst10	0.073197	0.627957	intron	intron	intron	Other
chr1	38934730	38935060	5.69	5.47	5.88	-0.41	0.156	0.308	FALSE	No_SigChange	5.24	5.47	4.97	0.5	0.193	0.288	FALSE	No_SigChange	5.63	5.88	5.34	0.54	0.0777	0.114	FALSE	No_SigChange	5.4	5.47	5.34	0.13	0.722	0.761	FALSE	No_SigChange	Intergenic	B3A|SINE|B2	-4254	NM_001011684	Nms	0.012158	0.466667	B3A	B2	SINE	SINE
chr1	38936790	38937160	5.84	5.61	6.04	-0.43	0.0807	0.19	FALSE	No_SigChange	5.42	5.61	5.2	0.41	0.168	0.258	FALSE	No_SigChange	5.78	6.04	5.47	0.57	0.0414	0.0668	FALSE	No_SigChange	5.54	5.6	5.47	0.14	0.653	0.699	FALSE	No_SigChange	Intergenic	Lx8|LINE|L1	-2174	NM_001011684	Nms	0.01626	0.494595	Lx8	L1	LINE	LINE
chr1	38939650	38940000	5.38	5.73	4.92	0.82	0.00512	0.0227	FALSE	No_SigChange	5.35	5.73	4.82	0.91	0.0103	0.0338	FALSE	No_SigChange	4.47	4.92	3.83	1.08	0.027	0.0466	FALSE	No_SigChange	5.07	5.73	3.83	1.9	1.1e-05	3.77e-05	TRUE	SigDecrease	intron	intron (NM_001011684, intron 1 of 9)	676	NM_001011684	Nms	0.014327	0.485714	intron	intron	intron	Other
chr1	38987210	38988160	9.2	9.28	9.12	0.16	0.44	0.623	FALSE	No_SigChange	9.06	9.27	8.82	0.46	0.072	0.137	FALSE	No_SigChange	8.81	9.11	8.43	0.68	0.00781	0.0164	FALSE	No_SigChange	8.91	9.27	8.43	0.84	0.000246	0.000624	TRUE	SigDecrease	promoter-TSS	promoter-TSS (NM_026850)	-129	NM_026850	Pdcl3	0.061117	0.605263	promoter-TSS	promoter-TSS	promoter-TSS	Other
chr1	39001270	39001520	5.59	5.71	5.45	0.26	0.306	0.491	FALSE	No_SigChange	5.46	5.71	5.15	0.56	0.0568	0.115	FALSE	No_SigChange	5.18	5.45	4.86	0.59	0.0488	0.0769	FALSE	No_SigChange	5.35	5.71	4.86	0.85	0.00511	0.00944	TRUE	SigDecrease	Intergenic	Intergenic	13581	NM_026850	Pdcl3	0.016064	0.444	Intergenic	Intergenic	Intergenic	Other
chr1	39006870	39007240	5.41	6.12	3.95	2.16	3.02e-11	2.45e-09	TRUE	SigDecrease	5.89	6.12	5.63	0.49	0.0891	0.16	FALSE	No_SigChange	4.02	3.95	4.09	-0.14	0.792	0.827	FALSE	No_SigChange	5.43	6.12	4.09	2.03	1.69e-08	1.06e-07	TRUE	SigDecrease	Intergenic	RMER17C|LTR|ERVK	19241	NM_026850	Pdcl3	0.00542	0.537838	RMER17C	ERVK	LTR	LTR
chr1	39010670	39011110	6.48	6.58	6.38	0.19	0.441	0.623	FALSE	No_SigChange	6.33	6.58	6.02	0.55	0.0562	0.114	FALSE	No_SigChange	6.09	6.38	5.73	0.65	0.0155	0.0291	FALSE	No_SigChange	6.21	6.58	5.73	0.84	0.00315	0.00612	TRUE	SigDecrease	Intergenic	Intergenic	23076	NM_026850	Pdcl3	0.022779	0.518182	Intergenic	Intergenic	Intergenic	Other
chr1	39017400	39017700	3.89	0.58	4.82	-4.23	1.86e-08	6.48e-07	TRUE	SigIncrease	2.78	0.58	3.61	-3.03	0.0014	0.00774	TRUE	SigIncrease	5.45	4.82	5.88	-1.06	0.00239	0.00606	TRUE	SigIncrease	4.92	0.58	5.88	-5.3	1.64e-15	4.84e-14	TRUE	SigIncrease	Intergenic	ORR1B1|LTR|ERVL-MaLR	29736	NM_026850	Pdcl3	0.020067	0.53	ORR1B1	ERVL-MaLR	LTR	LTR
chr1	39122740	39123340	6.01	6.15	5.85	0.3	0.294	0.479	FALSE	No_SigChange	6.2	6.15	6.24	-0.08	0.796	0.85	FALSE	No_SigChange	6.35	5.85	6.71	-0.86	0.00428	0.00989	TRUE	SigIncrease	6.46	6.15	6.71	-0.56	0.0733	0.101	FALSE	No_SigChange	Intergenic	RMER16C|LTR|ERVK	-71232	NM_008719	Npas2	0.015025	0.475	RMER16C	ERVK	LTR	LTR
chr1	39186680	39187170	7.46	7.56	7.34	0.22	0.297	0.482	FALSE	No_SigChange	7.27	7.56	6.9	0.66	0.0119	0.0374	FALSE	No_SigChange	6.97	7.34	6.47	0.87	0.000503	0.00162	TRUE	SigDecrease	7.12	7.56	6.47	1.08	2.25e-05	7.23e-05	TRUE	SigDecrease	Intergenic	promoter-TSS (NR_105767)	-7347	NM_008719	Npas2	0.00409	0.510204	promoter-TSS	promoter-TSS	promoter-TSS	Other
chr1	39192230	39194720	9.35	9.4	9.3	0.11	0.63	0.776	FALSE	No_SigChange	9.2	9.4	8.96	0.45	0.131	0.214	FALSE	No_SigChange	8.95	9.3	8.48	0.81	0.00121	0.00341	TRUE	SigDecrease	9.01	9.4	8.48	0.92	0.000549	0.00128	TRUE	SigDecrease	promoter-TSS	promoter-TSS (NM_008719)	-797	NM_008719	Npas2	0.069104	0.65261	promoter-TSS	promoter-TSS	promoter-TSS	Other
chr1	39196640	39197150	5.74	5.69	5.78	-0.09	0.752	0.858	FALSE	No_SigChange	5.6	5.69	5.49	0.2	0.52	0.618	FALSE	No_SigChange	5.71	5.78	5.64	0.14	0.609	0.664	FALSE	No_SigChange	5.66	5.69	5.64	0.06	0.845	0.87	FALSE	No_SigChange	intron	intron (NM_008719, intron 1 of 20)	2623	NM_008719	Npas2	0.015717	0.45098	intron	intron	intron	Other
chr1	39206980	39207170	5.35	5.25	5.44	-0.19	0.472	0.651	FALSE	No_SigChange	5.25	5.25	5.25	0	0.997	0.999	FALSE	No_SigChange	4.96	5.44	4.23	1.21	0.000144	0.000558	TRUE	SigDecrease	4.82	5.25	4.23	1.02	0.00251	0.00499	TRUE	SigDecrease	intron	intron (NM_008719, intron 1 of 20)	12803	NM_008719	Npas2	0.015873	0.526316	intron	intron	intron	Other
chr1	39253900	39254150	5.24	5.57	4.82	0.75	0.0122	0.0451	FALSE	No_SigChange	5.47	5.57	5.36	0.21	0.55	0.644	FALSE	No_SigChange	4.31	4.82	3.52	1.3	0.00379	0.00894	TRUE	SigDecrease	4.88	5.57	3.52	2.05	8.53e-07	3.71e-06	TRUE	SigDecrease	intron	intron (NM_008719, intron 1 of 20)	59753	NM_008719	Npas2	0.016064	0.588	intron	intron	intron	Other
chr1	39292000	39292400	6.83	6.68	6.96	-0.29	0.155	0.307	FALSE	No_SigChange	6.37	6.67	5.99	0.69	0.0143	0.0426	FALSE	No_SigChange	6.88	6.96	6.8	0.16	0.471	0.535	FALSE	No_SigChange	6.74	6.67	6.8	-0.12	0.597	0.648	FALSE	No_SigChange	intron	intron (NM_008719, intron 3 of 20)	-75651	NM_053257	Rpl31	0.007519	0.505	intron	intron	intron	Other
chr1	39335700	39336050	6.15	6.25	6.03	0.22	0.375	0.562	FALSE	No_SigChange	5.86	6.25	5.32	0.93	0.00144	0.00793	TRUE	SigDecrease	5.47	6.03	4.55	1.48	5.43e-06	3.33e-05	TRUE	SigDecrease	5.64	6.25	4.55	1.7	5.15e-08	2.9e-07	TRUE	SigDecrease	intron	intron (NM_008719, intron 14 of 20)	-31976	NM_053257	Rpl31	0.028653	0.548571	intron	intron	intron	Other
chr1	39340520	39340960	5.76	5.7	5.82	-0.12	0.62	0.769	FALSE	No_SigChange	5.67	5.7	5.64	0.06	0.862	0.901	FALSE	No_SigChange	5.43	5.82	4.91	0.91	0.0117	0.023	FALSE	No_SigChange	5.36	5.7	4.91	0.79	0.0353	0.0529	FALSE	No_SigChange	intron	intron (NM_008719, intron 16 of 20)	-27111	NM_053257	Rpl31	0.025057	0.472727	intron	intron	intron	Other
chr1	39345170	39345460	5.52	5.7	5.32	0.38	0.228	0.403	FALSE	No_SigChange	5.48	5.7	5.22	0.48	0.179	0.272	FALSE	No_SigChange	4.91	5.32	4.34	0.98	0.00796	0.0166	FALSE	No_SigChange	5.17	5.7	4.34	1.36	8.13e-05	0.00023	TRUE	SigDecrease	exon	exon (NM_008719, exon 17 of 21)	-22536	NM_053257	Rpl31	0.034602	0.548276	exon	exon	exon	Other
chr1	39359650	39359870	5.56	5.73	5.36	0.38	0.166	0.322	FALSE	No_SigChange	5.51	5.73	5.24	0.49	0.107	0.184	FALSE	No_SigChange	4.9	5.36	4.25	1.11	0.0012	0.0034	TRUE	SigDecrease	5.17	5.73	4.25	1.49	6.05e-06	2.19e-05	TRUE	SigDecrease	exon	exon (NM_008719, exon 20 of 21)	-8091	NM_053257	Rpl31	0.027397	0.631818	exon	exon	exon	Other
chr1	39361790	39362840	7.55	7.85	7.17	0.68	0.00345	0.0166	FALSE	No_SigChange	7.62	7.85	7.34	0.5	0.0762	0.143	FALSE	No_SigChange	6.9	7.17	6.56	0.61	0.0431	0.0693	FALSE	No_SigChange	7.34	7.85	6.56	1.29	1.15e-05	3.93e-05	TRUE	SigDecrease	3'UTR	3' UTR (NM_008719, exon 21 of 21)	-5536	NM_053257	Rpl31	0.027645	0.512381	3'UTR	3'UTR	3'UTR	Other
chr1	39363420	39363750	5.25	4.69	5.65	-0.96	0.0141	0.0505	FALSE	No_SigChange	4.51	4.68	4.32	0.36	0.431	0.535	FALSE	No_SigChange	5.21	5.65	4.57	1.08	0.00353	0.00844	TRUE	SigDecrease	4.63	4.68	4.57	0.12	0.81	0.839	FALSE	No_SigChange	TTS	TTS (NM_008719)	-4266	NM_053257	Rpl31	0.015198	0.472727	TTS	TTS	TTS	Other
chr1	39367420	39368290	8.21	8.12	8.29	-0.17	0.417	0.602	FALSE	No_SigChange	7.94	8.12	7.74	0.38	0.164	0.254	FALSE	No_SigChange	8.06	8.29	7.8	0.49	0.0593	0.0907	FALSE	No_SigChange	7.97	8.12	7.8	0.32	0.183	0.23	FALSE	No_SigChange	promoter-TSS	promoter-TSS (NM_001252218)	4	NM_001252219	Rpl31	0.089758	0.609195	promoter-TSS	promoter-TSS	promoter-TSS	Other
chr1	39372140	39375030	8.6	8.8	8.37	0.43	0.0312	0.0929	FALSE	No_SigChange	8.31	8.8	7.55	1.25	1.93e-05	0.000272	TRUE	SigDecrease	7.78	8.37	6.75	1.61	0.00144	0.00395	TRUE	SigDecrease	8.11	8.8	6.75	2.05	8.07e-09	5.42e-08	TRUE	SigDecrease	intron	intron (NM_018775, intron 19 of 19)	5734	NM_001252219	Rpl31	0.009346	0.448097	intron	intron	intron	Other
chr1	39376220	39377330	6.9	6.53	7.2	-0.67	0.0173	0.0592	FALSE	No_SigChange	6.17	6.53	5.69	0.84	0.00902	0.0308	FALSE	No_SigChange	6.43	7.2	4.66	2.54	0.00367	0.0087	TRUE	SigDecrease	5.88	6.53	4.66	1.87	0.032	0.0485	FALSE	No_SigChange	intron	intron (NM_018775, intron 16 of 19)	8924	NM_001252219	Rpl31	0.014427	0.463063	intron	intron	intron	Other
chr1	39390960	39391310	5.89	6.1	5.64	0.46	0.0914	0.209	FALSE	No_SigChange	5.63	6.1	4.92	1.18	0.000823	0.00518	TRUE	SigDecrease	4.9	5.64	3.32	2.32	0.00641	0.0139	FALSE	No_SigChange	5.3	6.1	3.32	2.78	0.00116	0.00251	TRUE	SigDecrease	exon	exon (NM_018775, exon 8 of 20)	23284	NM_001252219	Rpl31	0.037249	0.605714	exon	exon	exon	Other
chr1	39392170	39392570	6.18	6.26	6.11	0.15	0.536	0.704	FALSE	No_SigChange	6.04	6.26	5.77	0.48	0.0634	0.125	FALSE	No_SigChange	5.73	6.11	5.23	0.88	0.00435	0.01	FALSE	No_SigChange	5.83	6.25	5.23	1.03	0.000447	0.00107	TRUE	SigDecrease	intron	intron (NM_018775, intron 6 of 19)	24519	NM_001252219	Rpl31	0.007519	0.52	intron	intron	intron	Other
chr1	39474940	39475160	4.23	2.64	4.97	-2.32	4.02e-06	6.36e-05	TRUE	SigIncrease	1.91	2.64	0.32	2.32	0.0269	0.0672	FALSE	No_SigChange	4.19	4.96	2.39	2.57	1.42e-06	1.03e-05	TRUE	SigDecrease	2.52	2.64	2.39	0.25	0.757	0.793	FALSE	No_SigChange	intron	intron (NM_018775, intron 1 of 19)	3697	NM_018775	Tbc1d8	0.004566	0.527273	intron	intron	intron	Other
chr1	39477860	39479050	9.3	9.19	9.39	-0.21	0.326	0.513	FALSE	No_SigChange	8.91	9.19	8.57	0.62	0.0241	0.062	FALSE	No_SigChange	9.01	9.39	8.49	0.9	0.000418	0.00138	TRUE	SigDecrease	8.88	9.19	8.49	0.7	0.00505	0.00933	TRUE	SigDecrease	exon	exon (NM_018775, exon 1 of 20)	292	NM_018775	Tbc1d8	0.089992	0.659664	exon	exon	exon	Other
chr1	39522740	39522950	5.07	4.92	5.21	-0.29	0.365	0.552	FALSE	No_SigChange	5.02	4.92	5.11	-0.19	0.581	0.671	FALSE	No_SigChange	5.15	5.21	5.1	0.11	0.736	0.779	FALSE	No_SigChange	5.01	4.92	5.1	-0.18	0.587	0.638	FALSE	No_SigChange	Intergenic	Intergenic	-12957	NM_028043	Cnot11	0.009569	0.461905	Intergenic	Intergenic	Intergenic	Other
chr1	39527260	39527820	6.88	6.73	7.02	-0.29	0.197	0.364	FALSE	No_SigChange	6.57	6.73	6.4	0.33	0.219	0.316	FALSE	No_SigChange	6.68	7.01	6.24	0.77	0.00358	0.00854	TRUE	SigDecrease	6.51	6.73	6.24	0.49	0.0613	0.0865	FALSE	No_SigChange	Intergenic	Intergenic	-8262	NM_028043	Cnot11	0.014311	0.516071	Intergenic	Intergenic	Intergenic	Other
chr1	39530280	39531050	7.12	7.07	7.16	-0.08	0.682	0.812	FALSE	No_SigChange	6.91	7.07	6.72	0.35	0.195	0.29	FALSE	No_SigChange	6.88	7.15	6.55	0.61	0.0143	0.0272	FALSE	No_SigChange	6.83	7.07	6.55	0.53	0.0343	0.0515	FALSE	No_SigChange	Intergenic	Intergenic	-5137	NM_028043	Cnot11	0.016905	0.45974	Intergenic	Intergenic	Intergenic	Other
chr1	39533950	39534180	4.94	4.63	5.2	-0.57	0.0883	0.203	FALSE	No_SigChange	4.21	4.63	3.61	1.01	0.0282	0.0695	FALSE	No_SigChange	4.5	5.2	3.09	2.11	2.27e-07	2.07e-06	TRUE	SigDecrease	4.05	4.63	3.09	1.54	0.00118	0.00255	TRUE	SigDecrease	Intergenic	RMER10A|LTR|ERVL	-1737	NM_028043	Cnot11	0.008734	0.469565	RMER10A	ERVL	LTR	LTR
chr1	39535260	39536340	8.92	8.92	8.93	0	0.982	0.991	FALSE	No_SigChange	8.63	8.92	8.26	0.66	0.012	0.0377	FALSE	No_SigChange	8.65	8.92	8.32	0.61	0.018	0.0331	FALSE	No_SigChange	8.65	8.92	8.32	0.6	0.0217	0.0342	FALSE	No_SigChange	promoter-TSS	promoter-TSS (NM_028043)	-2	NM_028043	Cnot11	0.1038	0.652778	promoter-TSS	promoter-TSS	promoter-TSS	Other
chr1	39576500	39577840	9.32	9.23	9.41	-0.18	0.402	0.588	FALSE	No_SigChange	8.99	9.23	8.69	0.54	0.0588	0.118	FALSE	No_SigChange	9.17	9.41	8.89	0.52	0.039	0.0635	FALSE	No_SigChange	9.07	9.23	8.89	0.34	0.144	0.185	FALSE	No_SigChange	exon	exon (NM_001033135, exon 1 of 7)	177	NM_001033135	Rnf149	0.103062	0.664179	exon	exon	exon	Other
chr1	39614530	39615500	7.25	7.37	7.12	0.25	0.247	0.425	FALSE	No_SigChange	7.34	7.37	7.3	0.07	0.807	0.858	FALSE	No_SigChange	7.39	7.12	7.61	-0.49	0.0658	0.0991	FALSE	No_SigChange	7.5	7.37	7.61	-0.24	0.361	0.419	FALSE	No_SigChange	Intergenic	Intergenic	36167	NM_170597	Creg2	0.02064	0.5	Intergenic	Intergenic	Intergenic	Other
chr1	39628670	39628980	3.77	2.39	4.46	-2.07	0.000182	0.00152	TRUE	SigIncrease	1.64	2.39	0	2.39	0.0431	0.0941	FALSE	No_SigChange	4.74	4.46	4.98	-0.52	0.135	0.183	FALSE	No_SigChange	4.2	2.39	4.98	-2.59	5.36e-07	2.42e-06	TRUE	SigIncrease	intron	ORR1G-int|LTR|ERVL-MaLR	22357	NM_170597	Creg2	0.019417	0.5	ORR1G-int	ERVL-MaLR	LTR	LTR
chr1	39636620	39637050	5.91	6.24	5.47	0.78	0.00122	0.00721	TRUE	SigDecrease	5.88	6.24	5.41	0.83	0.00187	0.00963	TRUE	SigDecrease	5.03	5.47	4.41	1.06	0.00268	0.00669	TRUE	SigDecrease	5.6	6.24	4.41	1.83	4.37e-08	2.5e-07	TRUE	SigDecrease	intron	intron (NM_170597, intron 2 of 3)	14347	NM_170597	Creg2	0.011655	0.523256	intron	intron	intron	Other
chr1	39649980	39651240	7.59	7.78	7.37	0.42	0.049	0.131	FALSE	No_SigChange	7.56	7.78	7.31	0.48	0.0613	0.122	FALSE	No_SigChange	7.08	7.36	6.72	0.64	0.02	0.0361	FALSE	No_SigChange	7.35	7.78	6.72	1.06	0.000182	0.000476	TRUE	SigDecrease	exon	exon (NM_170597, exon 1 of 4)	572	NM_170597	Creg2	0.068308	0.613492	exon	exon	exon	Other
chr1	39663620	39664580	7.02	5.96	7.63	-1.67	1.45e-09	7.19e-08	TRUE	SigIncrease	5.99	5.96	6.03	-0.07	0.843	0.886	FALSE	No_SigChange	7.38	7.63	7.09	0.54	0.0428	0.0689	FALSE	No_SigChange	6.63	5.96	7.09	-1.13	0.000288	0.000719	TRUE	SigIncrease	Intergenic	RSINE1|SINE|B4	-12918	NM_170597	Creg2	0.01877	0.482292	RSINE1	B4	SINE	SINE
chr1	39720660	39721400	7.34	7.57	7.07	0.5	0.0214	0.0696	FALSE	No_SigChange	7.35	7.57	7.09	0.48	0.0921	0.164	FALSE	No_SigChange	6.78	7.07	6.41	0.66	0.0208	0.0373	FALSE	No_SigChange	7.1	7.57	6.41	1.15	6.43e-05	0.000187	TRUE	SigDecrease	promoter-TSS	promoter-TSS (NM_001145660)	-41	NM_001145660	Rfx8	0.058187	0.624324	promoter-TSS	promoter-TSS	promoter-TSS	Other
chr1	39736280	39736760	6.69	6.43	6.91	-0.48	0.0376	0.107	FALSE	No_SigChange	6.44	6.43	6.44	-0.01	0.985	0.99	FALSE	No_SigChange	6.68	6.91	6.41	0.5	0.0353	0.0584	FALSE	No_SigChange	6.42	6.43	6.41	0.02	0.932	0.944	FALSE	No_SigChange	Intergenic	Intergenic	-15531	NM_001145660	Rfx8	0.010438	0.4625	Intergenic	Intergenic	Intergenic	Other
chr1	39738820	39738980	5.32	5.52	5.09	0.43	0.118	0.253	FALSE	No_SigChange	4.99	5.51	4.15	1.36	5.72e-05	0.000648	TRUE	SigDecrease	4.29	5.09	2.39	2.69	2.98e-08	3.5e-07	TRUE	SigDecrease	4.67	5.51	2.39	3.12	2.14e-11	2.53e-10	TRUE	SigDecrease	Intergenic	MTE2b|LTR|ERVL-MaLR	-17911	NM_001145660	Rfx8	0.012579	0.51875	MTE2b	ERVL-MaLR	LTR	LTR
chr1	39761270	39762360	7.62	7.84	7.36	0.48	0.0178	0.0605	FALSE	No_SigChange	7.77	7.84	7.7	0.14	0.579	0.67	FALSE	No_SigChange	7.05	7.36	6.64	0.72	0.00357	0.00851	TRUE	SigDecrease	7.36	7.84	6.64	1.19	1.16e-06	4.91e-06	TRUE	SigDecrease	Intergenic	Intergenic	-40826	NM_001145660	Rfx8	0.02663	0.50367	Intergenic	Intergenic	Intergenic	Other
chr1	39772600	39772760	4.94	5.11	4.75	0.35	0.269	0.451	FALSE	No_SigChange	4.64	5.11	3.93	1.18	0.00684	0.0251	FALSE	No_SigChange	3.83	4.75	0.58	4.17	4.05e-09	6.07e-08	TRUE	SigDecrease	4.17	5.11	0.58	4.52	1.16e-10	1.17e-09	TRUE	SigDecrease	Intergenic	Intergenic	32652	NM_001177348	Gm3646	0.012579	0.6	Intergenic	Intergenic	Intergenic	Other
chr1	39815790	39816210	4.15	2.75	4.85	-2.09	6.46e-05	0.000649	TRUE	SigIncrease	3.6	2.75	4.13	-1.38	0.0401	0.0893	FALSE	No_SigChange	5.65	4.84	6.17	-1.33	1.56e-05	8.27e-05	TRUE	SigIncrease	5.3	2.75	6.17	-3.42	5.12e-16	1.69e-14	TRUE	SigIncrease	Intergenic	RMER6A|LTR|ERVK	-10668	NM_001177348	Gm3646	0.01432	0.452381	RMER6A	ERVK	LTR	LTR
chr1	39859200	39859690	6.79	7.07	6.43	0.64	0.00552	0.0241	FALSE	No_SigChange	6.71	7.07	6.22	0.85	0.00566	0.0219	FALSE	No_SigChange	6.13	6.43	5.75	0.68	0.00957	0.0194	FALSE	No_SigChange	6.56	7.07	5.75	1.32	2.37e-06	9.38e-06	TRUE	SigDecrease	Intergenic	MIR3|SINE|MIR	-12115	NR_040465	1700066B17Rik	0.014315	0.540816	MIR3	MIR	SINE	SINE
chr1	39884960	39885270	5.61	5.89	5.26	0.63	0.0132	0.0479	FALSE	No_SigChange	5.39	5.89	4.61	1.27	0.000346	0.00266	TRUE	SigDecrease	4.61	5.25	3.43	1.83	0.0617	0.0937	FALSE	No_SigChange	5.13	5.89	3.43	2.46	0.0118	0.0199	FALSE	No_SigChange	Intergenic	Intergenic	-15798	NM_001252201	Map4k4	0.02589	0.509677	Intergenic	Intergenic	Intergenic	Other
chr1	39893010	39893560	6.55	5.93	6.98	-1.05	1.16e-05	0.000155	TRUE	SigIncrease	5.71	5.93	5.45	0.48	0.119	0.199	FALSE	No_SigChange	6.9	6.98	6.81	0.17	0.485	0.548	FALSE	No_SigChange	6.44	5.93	6.81	-0.88	0.000577	0.00134	TRUE	SigIncrease	Intergenic	C-rich|Low_complexity|Low_complexity	-7628	NM_001252201	Map4k4	0.005464	0.432727	C-rich	Low_complexity	Low_complexity	Other
chr1	39900070	39901870	9.19	9.19	9.19	0	1	1	FALSE	No_SigChange	8.94	9.18	8.63	0.55	0.0651	0.127	FALSE	No_SigChange	8.87	9.18	8.48	0.7	0.00631	0.0137	FALSE	No_SigChange	8.87	9.18	8.48	0.7	0.00604	0.0109	FALSE	No_SigChange	promoter-TSS	promoter-TSS (NM_001252202)	57	NM_001252202	Map4k4	0.101723	0.668333	promoter-TSS	promoter-TSS	promoter-TSS	Other
chr1	39902540	39903290	7.8	7.8	7.8	0	1	1	FALSE	No_SigChange	7.08	7.8	5.58	2.21	0.000122	0.00118	TRUE	SigDecrease	7.02	7.8	5.21	2.59	1.95e-14	1.23e-12	TRUE	SigDecrease	7.02	7.8	5.21	2.59	5.6e-13	9.48e-12	TRUE	SigDecrease	intron	intron (NM_008696, intron 2 of 30)	2002	NM_001252202	Map4k4	0.006676	0.46	intron	intron	intron	Other
chr1	39906910	39907130	4.86	4.91	4.82	0.09	0.837	0.911	FALSE	No_SigChange	4.92	4.91	4.94	-0.04	0.928	0.95	FALSE	No_SigChange	4.89	4.82	4.96	-0.15	0.715	0.761	FALSE	No_SigChange	4.93	4.9	4.96	-0.06	0.884	0.903	FALSE	No_SigChange	intron	intron (NM_008696, intron 2 of 30)	6107	NM_001252202	Map4k4	0.03653	0.577273	intron	intron	intron	Other
chr1	39923490	39924140	6.99	7.18	6.77	0.41	0.135	0.278	FALSE	No_SigChange	6.53	7.18	5.29	1.9	3.77e-09	2.47e-07	TRUE	SigDecrease	6.13	6.77	4.95	1.82	3.01e-08	3.53e-07	TRUE	SigDecrease	6.46	7.18	4.95	2.23	6.71e-11	7.14e-10	TRUE	SigDecrease	intron	intron (NM_008696, intron 2 of 30)	22902	NM_001252202	Map4k4	0.01849	0.501538	intron	intron	intron	Other
chr1	39935740	39936780	7.59	7.68	7.5	0.18	0.356	0.543	FALSE	No_SigChange	7.34	7.68	6.88	0.8	0.004	0.017	FALSE	No_SigChange	7.15	7.5	6.7	0.79	0.00141	0.00388	TRUE	SigDecrease	7.27	7.68	6.7	0.98	9.08e-05	0.000255	TRUE	SigDecrease	intron	C-rich|Low_complexity|Low_complexity	35347	NM_001252202	Map4k4	0.052936	0.590385	C-rich	Low_complexity	Low_complexity	Other
chr1	39950050	39950500	6.78	6.72	6.83	-0.12	0.67	0.804	FALSE	No_SigChange	6.54	6.72	6.34	0.38	0.135	0.22	FALSE	No_SigChange	6.72	6.83	6.6	0.24	0.404	0.47	FALSE	No_SigChange	6.66	6.72	6.6	0.12	0.603	0.654	FALSE	No_SigChange	intron	(CGGGG)n|Simple_repeat|Simple_repeat	49362	NM_001252202	Map4k4	0.01559	0.526667	(CGGGG)n	Simple_repeat	Simple_repeat	Other
chr1	39956670	39956980	6.16	6.38	5.9	0.48	0.115	0.247	FALSE	No_SigChange	5.87	6.38	5.05	1.33	0.000119	0.00116	TRUE	SigDecrease	5.31	5.9	4.28	1.61	3.91e-06	2.49e-05	TRUE	SigDecrease	5.68	6.38	4.28	2.1	6.07e-10	5.25e-09	TRUE	SigDecrease	intron	intron (NM_008696, intron 2 of 30)	55912	NM_001252202	Map4k4	0.016181	0.487097	intron	intron	intron	Other
chr1	40000620	40001030	5.83	5.75	5.89	-0.14	0.572	0.732	FALSE	No_SigChange	5.46	5.75	5.1	0.66	0.0248	0.0634	FALSE	No_SigChange	5.33	5.89	4.39	1.5	8.94e-07	6.88e-06	TRUE	SigDecrease	5.23	5.75	4.39	1.36	1.38e-05	4.62e-05	TRUE	SigDecrease	intron	intron (NM_001252201, intron 15 of 30)	-83943	NM_010555	Il1r2	0.02934	0.52439	intron	intron	intron	Other
chr1	40055230	40055900	6.65	6.71	6.59	0.12	0.618	0.767	FALSE	No_SigChange	6.38	6.71	5.97	0.74	0.0312	0.0747	FALSE	No_SigChange	6.21	6.59	5.71	0.88	0.00107	0.00308	TRUE	SigDecrease	6.29	6.71	5.71	1	0.000782	0.00176	TRUE	SigDecrease	Intergenic	RMER17B|LTR|ERVK	-29203	NM_010555	Il1r2	0.03139	0.550746	RMER17B	ERVK	LTR	LTR
chr1	40057670	40058030	5.29	5.77	4.57	1.21	6.27e-05	0.000633	TRUE	SigDecrease	5.34	5.77	4.71	1.06	0.000747	0.0048	TRUE	SigDecrease	4.43	4.57	4.28	0.28	0.478	0.541	FALSE	No_SigChange	5.21	5.77	4.28	1.49	2.1e-05	6.77e-05	TRUE	SigDecrease	Intergenic	Intergenic	-26918	NM_010555	Il1r2	0.013928	0.561111	Intergenic	Intergenic	Intergenic	Other
chr1	40085660	40086100	6.73	6.84	6.61	0.23	0.26	0.441	FALSE	No_SigChange	6.65	6.83	6.45	0.39	0.147	0.233	FALSE	No_SigChange	6.3	6.61	5.89	0.71	0.0102	0.0204	FALSE	No_SigChange	6.44	6.83	5.89	0.94	0.000661	0.00151	TRUE	SigDecrease	promoter-TSS	promoter-TSS (NR_037980)	-29	NR_037980	Gm16894	0.04328	0.525	promoter-TSS	promoter-TSS	promoter-TSS	Other
chr1	40095640	40095930	4.18	4.04	4.3	-0.26	0.514	0.686	FALSE	No_SigChange	4.16	4.04	4.27	-0.22	0.611	0.697	FALSE	No_SigChange	4.54	4.3	4.74	-0.44	0.212	0.269	FALSE	No_SigChange	4.43	4.04	4.74	-0.7	0.0666	0.0931	FALSE	No_SigChange	intron	intron (NM_010555, intron 1 of 8)	-9934	NR_037980	Gm16894	0.00346	0.427586	intron	intron	intron	Other
chr1	40101520	40101970	5.78	5.81	5.75	0.06	0.833	0.909	FALSE	No_SigChange	5.73	5.81	5.66	0.15	0.642	0.724	FALSE	No_SigChange	5.3	5.75	4.66	1.09	0.000695	0.00214	TRUE	SigDecrease	5.34	5.8	4.66	1.15	0.00039	0.000944	TRUE	SigDecrease	intron	intron (NM_010555, intron 1 of 8)	-15894	NR_037980	Gm16894	0.024499	0.546667	intron	intron	intron	Other
chr1	40116440	40116680	5.47	5.52	5.41	0.11	0.671	0.805	FALSE	No_SigChange	5.6	5.52	5.67	-0.15	0.585	0.675	FALSE	No_SigChange	5.22	5.41	5	0.41	0.17	0.223	FALSE	No_SigChange	5.28	5.52	5	0.52	0.0791	0.109	FALSE	No_SigChange	intron	intron (NM_010555, intron 5 of 8)	-30709	NR_037980	Gm16894	0.029289	0.520833	intron	intron	intron	Other
chr1	40211490	40211900	4.24	3.36	4.78	-1.42	0.000897	0.0056	TRUE	SigIncrease	2.73	3.36	1.58	1.77	0.022	0.0582	FALSE	No_SigChange	5.27	4.78	5.64	-0.86	0.0147	0.0279	FALSE	No_SigChange	4.91	3.36	5.64	-2.28	9.39e-08	4.99e-07	TRUE	SigIncrease	Intergenic	IAPLTR2b|LTR|ERVK	-13385	NM_008362	Il1r1	0.036675	0.502439	IAPLTR2b	ERVK	LTR	LTR
chr1	40266360	40267140	7.32	7.62	6.94	0.68	0.00091	0.00567	TRUE	SigDecrease	7.37	7.62	7.07	0.55	0.0597	0.119	FALSE	No_SigChange	6.45	6.94	5.71	1.23	4.79e-05	0.000217	TRUE	SigDecrease	6.96	7.62	5.71	1.91	9.24e-10	7.68e-09	TRUE	SigDecrease	5'UTR	5' UTR (NM_001123382, exon 1 of 11)	164	NM_001123382	Il1r1	0.046213	0.60641	5'UTR	5'UTR	5'UTR	Other
chr1	40290730	40290990	5.11	5.48	4.61	0.87	0.00846	0.0338	FALSE	No_SigChange	5.42	5.48	5.35	0.13	0.656	0.736	FALSE	No_SigChange	4.72	4.61	4.82	-0.21	0.562	0.621	FALSE	No_SigChange	5.19	5.48	4.82	0.66	0.0373	0.0556	FALSE	No_SigChange	intron	intron (NM_001123382, intron 2 of 10)	24274	NM_001123382	Il1r1	0.019305	0.476923	intron	intron	intron	Other
chr1	40303320	40303590	4.98	4.91	5.05	-0.15	0.726	0.842	FALSE	No_SigChange	4.62	4.91	4.27	0.64	0.202	0.298	FALSE	No_SigChange	4.52	5.05	3.67	1.38	0.00195	0.00512	TRUE	SigDecrease	4.42	4.9	3.67	1.23	0.0129	0.0216	FALSE	No_SigChange	intron	RLTR17|LTR|ERVK	-21172	NM_133193	Il1rl2	0.01487	0.503704	RLTR17	ERVK	LTR	LTR
chr1	40306280	40306520	4.54	4.83	4.17	0.66	0.077	0.184	FALSE	No_SigChange	4.71	4.83	4.58	0.25	0.489	0.589	FALSE	No_SigChange	3.66	4.17	2.86	1.31	0.0119	0.0233	FALSE	No_SigChange	4.16	4.83	2.86	1.97	2.75e-05	8.67e-05	TRUE	SigDecrease	intron	RLTR17|LTR|ERVK	-18227	NM_133193	Il1rl2	0.008368	0.479167	RLTR17	ERVK	LTR	LTR
chr1	40325330	40326530	8.03	8.32	7.66	0.66	0.00483	0.0217	FALSE	No_SigChange	7.98	8.32	7.54	0.79	0.0119	0.0375	FALSE	No_SigChange	7.08	7.66	6.1	1.56	6.09e-10	1.14e-08	TRUE	SigDecrease	7.6	8.32	6.1	2.22	3.89e-15	1.07e-13	TRUE	SigDecrease	intron	CpG	1303	NM_133193	Il1rl2	0.036697	0.5575	CpG	CpG	CpG	Other
chr1	40380090	40380400	5.11	5.03	5.19	-0.16	0.64	0.783	FALSE	No_SigChange	4.86	5.03	4.66	0.37	0.333	0.438	FALSE	No_SigChange	5	5.19	4.78	0.41	0.256	0.317	FALSE	No_SigChange	4.91	5.03	4.78	0.25	0.513	0.569	FALSE	No_SigChange	Intergenic	Intergenic	55618	NM_133193	Il1rl2	0.009709	0.441935	Intergenic	Intergenic	Intergenic	Other
chr1	40465630	40465850	5.19	5.55	4.71	0.83	0.0052	0.023	FALSE	No_SigChange	5.5	5.55	5.45	0.09	0.775	0.833	FALSE	No_SigChange	4.64	4.71	4.57	0.14	0.678	0.728	FALSE	No_SigChange	5.14	5.54	4.57	0.98	0.00232	0.00465	TRUE	SigDecrease	promoter-TSS	promoter-TSS (NM_008365)	119	NM_001161843	Il18r1	0.027397	0.604545	promoter-TSS	promoter-TSS	promoter-TSS	Other
chr1	40579950	40580140	5.12	5.21	5.02	0.19	0.576	0.735	FALSE	No_SigChange	5.04	5.21	4.85	0.36	0.327	0.432	FALSE	No_SigChange	4.34	5.02	3	2.02	5.54e-06	3.38e-05	TRUE	SigDecrease	4.49	5.21	3	2.21	1.24e-06	5.22e-06	TRUE	SigDecrease	promoter-TSS	promoter-TSS (NM_177084)	-182	NM_177084	Slc9a4	0.021164	0.478947	promoter-TSS	promoter-TSS	promoter-TSS	Other
chr1	40658000	40658330	5.3	5.66	4.83	0.83	0.00435	0.02	FALSE	No_SigChange	5.35	5.66	4.97	0.69	0.0282	0.0695	FALSE	No_SigChange	5.04	4.83	5.23	-0.4	0.183	0.237	FALSE	No_SigChange	5.46	5.66	5.23	0.43	0.145	0.187	FALSE	No_SigChange	Intergenic	Intergenic	-23547	NM_001033289	Slc9a2	0.018237	0.469697	Intergenic	Intergenic	Intergenic	Other
chr1	40665390	40666310	7.34	7.66	6.93	0.73	0.00469	0.0212	FALSE	No_SigChange	7.1	7.66	6.18	1.47	2.87e-06	5.77e-05	TRUE	SigDecrease	6.03	6.93	3.21	3.72	2.22e-07	2.03e-06	TRUE	SigDecrease	6.72	7.66	3.21	4.45	1.17e-09	9.52e-09	TRUE	SigDecrease	Intergenic	Intergenic	-15862	NM_001033289	Slc9a2	0.01197	0.461957	Intergenic	Intergenic	Intergenic	Other
chr1	40680270	40682180	8.64	8.79	8.46	0.33	0.142	0.289	FALSE	No_SigChange	8.67	8.79	8.54	0.25	0.368	0.473	FALSE	No_SigChange	8.15	8.46	7.75	0.71	0.00835	0.0173	FALSE	No_SigChange	8.36	8.79	7.75	1.04	0.000132	0.000357	TRUE	SigDecrease	promoter-TSS	promoter-TSS (NM_001033289)	-487	NM_001033289	Slc9a2	0.075956	0.627749	promoter-TSS	promoter-TSS	promoter-TSS	Other
chr1	40714150	40714570	5.85	5.37	6.21	-0.84	0.00148	0.00842	TRUE	SigIncrease	5.12	5.37	4.82	0.55	0.0901	0.162	FALSE	No_SigChange	6.2	6.21	6.18	0.03	0.891	0.912	FALSE	No_SigChange	5.83	5.37	6.18	-0.81	0.00324	0.00627	TRUE	SigIncrease	intron	intron (NM_001033289, intron 1 of 11)	32648	NM_001033289	Slc9a2	0.02148	0.497619	intron	intron	intron	Other
chr1	40768620	40768990	5.98	6.12	5.82	0.3	0.322	0.509	FALSE	No_SigChange	6.13	6.12	6.14	-0.02	0.932	0.953	FALSE	No_SigChange	5.71	5.82	5.58	0.23	0.481	0.545	FALSE	No_SigChange	5.88	6.12	5.58	0.54	0.04	0.0591	FALSE	No_SigChange	TTS	TTS (NM_001033289)	21852	NM_172499	Mfsd9	0.01626	0.505405	TTS	TTS	TTS	Other
chr1	40790230	40790930	7.94	8.09	7.77	0.32	0.0633	0.159	FALSE	No_SigChange	8.02	8.09	7.95	0.14	0.552	0.646	FALSE	No_SigChange	7.66	7.77	7.54	0.23	0.312	0.376	FALSE	No_SigChange	7.84	8.09	7.54	0.55	0.0161	0.0263	FALSE	No_SigChange	promoter-TSS	promoter-TSS (NM_172499)	77	NM_172499	Mfsd9	0.051502	0.587143	promoter-TSS	promoter-TSS	promoter-TSS	Other
chr1	40797420	40797650	6.15	6.21	6.09	0.12	0.597	0.751	FALSE	No_SigChange	5.93	6.21	5.57	0.64	0.0308	0.0739	FALSE	No_SigChange	5.87	6.09	5.61	0.48	0.0729	0.108	FALSE	No_SigChange	5.94	6.21	5.61	0.6	0.0257	0.0398	FALSE	No_SigChange	Intergenic	Intergenic	-6878	NM_172499	Mfsd9	0.0131	0.473913	Intergenic	Intergenic	Intergenic	Other
chr1	40844590	40844890	5.02	5.29	4.69	0.61	0.0463	0.125	FALSE	No_SigChange	5.37	5.29	5.45	-0.16	0.593	0.681	FALSE	No_SigChange	4.7	4.68	4.71	-0.03	0.935	0.948	FALSE	No_SigChange	5.03	5.29	4.71	0.58	0.0893	0.121	FALSE	No_SigChange	intron	intron (NM_001081198, intron 4 of 4)	39139	NM_001081198	Tmem182	0.003344	0.43	intron	intron	intron	Other
chr1	40887650	40887950	5.68	5.76	5.59	0.17	0.55	0.715	FALSE	No_SigChange	5.39	5.76	4.89	0.87	0.0102	0.0335	FALSE	No_SigChange	5.46	5.59	5.32	0.27	0.344	0.409	FALSE	No_SigChange	5.56	5.76	5.32	0.44	0.156	0.199	FALSE	No_SigChange	Intergenic	Intergenic	82199	NM_001081198	Tmem182	0.023411	0.52	Intergenic	Intergenic	Intergenic	Other
chr1	40908140	40908310	3.71	4.34	2.58	1.75	0.0753	0.181	FALSE	No_SigChange	4.45	4.34	4.55	-0.22	0.709	0.78	FALSE	No_SigChange	3	2.58	3.32	-0.74	0.251	0.312	FALSE	No_SigChange	3.92	4.34	3.32	1.02	0.114	0.151	FALSE	No_SigChange	Intergenic	Intergenic	102624	NM_001081198	Tmem182	0	0.405882	Intergenic	Intergenic	Intergenic	Other
chr1	40968330	40968760	5.82	5.19	6.26	-1.07	0.000475	0.00336	TRUE	SigIncrease	4.68	5.19	3.88	1.31	0.00199	0.0101	FALSE	No_SigChange	5.87	6.26	5.35	0.91	0.00155	0.00421	TRUE	SigDecrease	5.27	5.19	5.35	-0.16	0.657	0.703	FALSE	No_SigChange	Intergenic	Intergenic	162944	NM_001081198	Tmem182	0.011655	0.432558	Intergenic	Intergenic	Intergenic	Other
chr1	41001730	41001930	4.43	4.61	4.21	0.41	0.314	0.5	FALSE	No_SigChange	4.75	4.61	4.87	-0.26	0.504	0.603	FALSE	No_SigChange	3.92	4.21	3.55	0.65	0.163	0.214	FALSE	No_SigChange	4.18	4.61	3.55	1.06	0.022	0.0346	FALSE	No_SigChange	Intergenic	Intergenic	179422	NR_040475	4930448I06Rik	0.01005	0.47	Intergenic	Intergenic	Intergenic	Other
chr1	41131250	41131880	7.61	7.31	7.85	-0.54	0.0213	0.0693	FALSE	No_SigChange	7.11	7.31	6.87	0.44	0.09	0.161	FALSE	No_SigChange	7.4	7.85	6.73	1.13	0.000145	0.000562	TRUE	SigDecrease	7.05	7.31	6.73	0.58	0.0345	0.0518	FALSE	No_SigChange	Intergenic	Intergenic	49687	NR_040475	4930448I06Rik	0.020668	0.496825	Intergenic	Intergenic	Intergenic	Other
chr1	41140660	41140810	5.26	5	5.48	-0.48	0.202	0.37	FALSE	No_SigChange	4.49	5	3.7	1.3	0.0103	0.0339	FALSE	No_SigChange	4.89	5.48	3.86	1.62	1.83e-05	9.51e-05	TRUE	SigDecrease	4.54	5	3.86	1.14	0.0158	0.0259	FALSE	No_SigChange	Intergenic	Intergenic	40517	NR_040475	4930448I06Rik	0.006711	0.473333	Intergenic	Intergenic	Intergenic	Other
chr1	41264180	41264610	5.77	5.93	5.59	0.34	0.215	0.387	FALSE	No_SigChange	5.92	5.93	5.91	0.02	0.937	0.956	FALSE	No_SigChange	5.39	5.59	5.15	0.44	0.169	0.222	FALSE	No_SigChange	5.59	5.93	5.15	0.78	0.0179	0.0288	FALSE	No_SigChange	Intergenic	LTR41|LTR|ERVL	-83143	NR_040475	4930448I06Rik	0.02331	0.5	LTR41	ERVL	LTR	LTR
chr1	41390200	41390610	7.05	7.2	6.88	0.32	0.117	0.251	FALSE	No_SigChange	6.67	7.2	5.83	1.37	1.51e-07	5.19e-06	TRUE	SigDecrease	6.28	6.88	5.25	1.63	4.85e-10	9.36e-09	TRUE	SigDecrease	6.53	7.2	5.25	1.95	1.04e-15	3.21e-14	TRUE	SigDecrease	Intergenic	Intergenic	-209153	NR_040475	4930448I06Rik	0.00978	0.490244	Intergenic	Intergenic	Intergenic	Other
chr1	41502530	41502780	3.78	4.37	2.75	1.62	0.00256	0.0131	FALSE	No_SigChange	4.73	4.37	5.02	-0.65	0.0837	0.153	FALSE	No_SigChange	2.25	2.75	1.46	1.29	0.163	0.215	FALSE	No_SigChange	3.55	4.37	1.46	2.91	2.14e-05	6.89e-05	TRUE	SigDecrease	Intergenic	RMER17B|LTR|ERVK	-321403	NR_040475	4930448I06Rik	0.02008	0.576	RMER17B	ERVK	LTR	LTR
chr1	41810470	41810740	5.81	5.93	5.69	0.24	0.36	0.548	FALSE	No_SigChange	5.68	5.93	5.38	0.55	0.0571	0.115	FALSE	No_SigChange	5.5	5.68	5.28	0.4	0.188	0.243	FALSE	No_SigChange	5.64	5.93	5.28	0.64	0.0296	0.0452	FALSE	No_SigChange	Intergenic	Intergenic	-629353	NR_040475	4930448I06Rik	0.011152	0.459259	Intergenic	Intergenic	Intergenic	Other
chr1	42035280	42035660	5.89	5.57	6.16	-0.59	0.0374	0.107	FALSE	No_SigChange	5.64	5.57	5.7	-0.13	0.699	0.771	FALSE	No_SigChange	6.33	6.16	6.49	-0.33	0.154	0.205	FALSE	No_SigChange	6.1	5.57	6.49	-0.92	0.00153	0.0032	TRUE	SigIncrease	Intergenic	Intergenic	659355	NR_027826	Pantr1	0.01847	0.502632	Intergenic	Intergenic	Intergenic	Other
chr1	42058510	42058910	6.77	6.48	7.01	-0.53	0.0228	0.0731	FALSE	No_SigChange	5.76	6.48	4.23	2.25	3.36e-08	1.52e-06	TRUE	SigDecrease	6.22	7.01	4.37	2.63	1.47e-19	3.2e-17	TRUE	SigDecrease	5.78	6.48	4.37	2.11	1.83e-11	2.19e-10	TRUE	SigDecrease	Intergenic	ORR1D2|LTR|ERVL-MaLR	636115	NR_027826	Pantr1	0	0.4325	ORR1D2	ERVL-MaLR	LTR	LTR
chr1	42392190	42392390	5.02	5.39	4.51	0.88	0.00504	0.0224	FALSE	No_SigChange	4.95	5.39	4.3	1.09	0.00279	0.013	FALSE	No_SigChange	3.79	4.51	2.32	2.18	3.95e-05	0.000184	TRUE	SigDecrease	4.55	5.39	2.32	3.07	1.51e-10	1.48e-09	TRUE	SigDecrease	Intergenic	Intergenic	302535	NR_027826	Pantr1	0.005025	0.54	Intergenic	Intergenic	Intergenic	Other
chr1	42436510	42437060	6.5	6.27	6.7	-0.43	0.0494	0.132	FALSE	No_SigChange	6.04	6.27	5.78	0.48	0.0737	0.139	FALSE	No_SigChange	6.65	6.7	6.6	0.1	0.633	0.686	FALSE	No_SigChange	6.44	6.26	6.6	-0.33	0.161	0.205	FALSE	No_SigChange	Intergenic	RLTR9E|LTR|ERVK	258040	NR_027826	Pantr1	0.01275	0.509091	RLTR9E	ERVK	LTR	LTR
chr1	42491120	42492090	7.96	7.87	8.05	-0.18	0.411	0.596	FALSE	No_SigChange	7.71	7.87	7.53	0.34	0.147	0.234	FALSE	No_SigChange	7.58	8.04	6.9	1.14	8.63e-06	4.96e-05	TRUE	SigDecrease	7.46	7.87	6.9	0.97	8.2e-05	0.000232	TRUE	SigDecrease	Intergenic	Intergenic	203220	NR_027826	Pantr1	0.042312	0.585567	Intergenic	Intergenic	Intergenic	Other
chr1	42543180	42543540	5.7	5.67	5.72	-0.05	0.849	0.918	FALSE	No_SigChange	5.56	5.67	5.44	0.23	0.444	0.548	FALSE	No_SigChange	5.69	5.72	5.66	0.06	0.815	0.847	FALSE	No_SigChange	5.66	5.67	5.66	0.01	0.964	0.971	FALSE	No_SigChange	Intergenic	Intergenic	151465	NR_027826	Pantr1	0.033426	0.502778	Intergenic	Intergenic	Intergenic	Other
chr1	42589200	42589750	4.94	2.75	5.77	-3.02	1.3e-13	2.15e-11	TRUE	SigIncrease	4.12	2.75	4.81	-2.05	4.51e-05	0.000535	TRUE	SigIncrease	6.07	5.77	6.32	-0.54	0.0333	0.0555	FALSE	No_SigChange	5.43	2.75	6.32	-3.56	5.83e-19	3.69e-17	TRUE	SigIncrease	Intergenic	Intergenic	105350	NR_027826	Pantr1	0.014572	0.487273	Intergenic	Intergenic	Intergenic	Other
chr1	42591790	42592220	4.12	4.19	4.04	0.15	0.748	0.856	FALSE	No_SigChange	4.73	4.19	5.13	-0.94	0.0509	0.106	FALSE	No_SigChange	5.54	4.04	6.26	-2.22	2.98e-12	1.03e-10	TRUE	SigIncrease	5.57	4.19	6.26	-2.07	1.76e-09	1.36e-08	TRUE	SigIncrease	Intergenic	Intergenic	102820	NR_027826	Pantr1	0.002331	0.516279	Intergenic	Intergenic	Intergenic	Other
chr1	42606170	42606520	4.04	2.52	4.77	-2.24	5.45e-06	8.21e-05	TRUE	SigIncrease	2.32	2.52	2.09	0.43	0.596	0.685	FALSE	No_SigChange	5.4	4.77	5.83	-1.07	0.000253	0.000905	TRUE	SigIncrease	4.97	2.52	5.83	-3.31	5.33e-15	1.41e-13	TRUE	SigIncrease	Intergenic	Intergenic	88480	NR_027826	Pantr1	0.020057	0.482857	Intergenic	Intergenic	Intergenic	Other
chr1	42684200	42685340	8.17	8.33	7.99	0.34	0.145	0.293	FALSE	No_SigChange	8.15	8.33	7.95	0.38	0.162	0.251	FALSE	No_SigChange	7.67	7.98	7.28	0.71	0.0177	0.0326	FALSE	No_SigChange	7.9	8.33	7.28	1.05	0.000818	0.00183	TRUE	SigDecrease	intron	CpG	10055	NR_027826	Pantr1	0.050922	0.592982	CpG	CpG	CpG	Other
chr1	42686110	42687130	8.09	8.32	7.81	0.51	0.0263	0.0814	FALSE	No_SigChange	8.16	8.32	7.97	0.35	0.245	0.345	FALSE	No_SigChange	7.53	7.81	7.2	0.61	0.035	0.0579	FALSE	No_SigChange	7.87	8.32	7.2	1.13	0.000175	0.00046	TRUE	SigDecrease	intron	CpG	8205	NR_027826	Pantr1	0.052012	0.57549	CpG	CpG	CpG	Other
chr1	42693930	42699760	10.77	11	10.51	0.48	0.0193	0.0645	FALSE	No_SigChange	10.7	10.99	10.32	0.67	0.00906	0.0309	FALSE	No_SigChange	10.22	10.51	9.86	0.65	0.0113	0.0223	FALSE	No_SigChange	10.54	10.99	9.86	1.13	6.85e-06	2.45e-05	TRUE	SigDecrease	promoter-TSS	promoter-TSS (NM_008900)	-301	NM_008900	Pou3f3	0.080631	0.621441	promoter-TSS	promoter-TSS	promoter-TSS	Other
chr1	42703400	42704340	7.16	7.47	6.78	0.69	0.00147	0.00838	TRUE	SigDecrease	7.1	7.47	6.61	0.86	0.00259	0.0123	FALSE	No_SigChange	6.03	6.78	4.41	2.37	1.24e-16	1.36e-14	TRUE	SigDecrease	6.63	7.47	4.41	3.06	1.02e-23	1.76e-21	TRUE	SigDecrease	TTS	TTS (NR_027891)	3534	NR_027891	2900092D14Rik	0.022364	0.528723	TTS	TTS	TTS	Other
chr1	42713110	42714940	8.67	9.04	8.16	0.89	4.03e-05	0.00044	TRUE	SigDecrease	8.76	9.04	8.42	0.62	0.0254	0.0644	FALSE	No_SigChange	7.92	8.15	7.63	0.52	0.0193	0.0351	FALSE	No_SigChange	8.5	9.04	7.63	1.41	9.19e-09	6.1e-08	TRUE	SigDecrease	Intergenic	promoter-TSS (NR_110495)	13689	NR_027891	2900092D14Rik	0.04538	0.572131	promoter-TSS	promoter-TSS	promoter-TSS	Other
chr1	42718740	42718890	5.12	4.95	5.28	-0.32	0.328	0.514	FALSE	No_SigChange	4.84	4.95	4.73	0.22	0.525	0.622	FALSE	No_SigChange	4.9	5.27	4.39	0.88	0.0141	0.0269	FALSE	No_SigChange	4.7	4.95	4.39	0.56	0.127	0.166	FALSE	No_SigChange	Intergenic	Intergenic	18479	NR_027891	2900092D14Rik	0.026846	0.573333	Intergenic	Intergenic	Intergenic	Other
chr1	42761290	42761610	4.26	3.64	4.69	-1.04	0.0131	0.0475	FALSE	No_SigChange	2.78	3.64	0.32	3.32	0.00017	0.00153	TRUE	SigDecrease	5.13	4.68	5.47	-0.78	0.0307	0.0519	FALSE	No_SigChange	4.83	3.64	5.47	-1.83	1.28e-05	4.32e-05	TRUE	SigIncrease	Intergenic	Intergenic	61114	NR_027891	2900092D14Rik	0.025078	0.465625	Intergenic	Intergenic	Intergenic	Other
chr1	42850860	42852020	9.16	9.17	9.16	0.01	0.97	0.985	FALSE	No_SigChange	8.99	9.17	8.78	0.39	0.0928	0.165	FALSE	No_SigChange	8.94	9.16	8.69	0.47	0.0455	0.0725	FALSE	No_SigChange	8.95	9.17	8.69	0.48	0.0276	0.0424	FALSE	No_SigChange	intron	CpG	207	NM_023514	Mrps9	0.047455	0.563793	CpG	CpG	CpG	Other
chr1	42856340	42856580	5.33	5.16	5.48	-0.32	0.312	0.498	FALSE	No_SigChange	4.61	5.16	3.7	1.46	0.000731	0.00472	TRUE	SigDecrease	5.07	5.47	4.51	0.97	0.00497	0.0112	FALSE	No_SigChange	4.87	5.16	4.51	0.65	0.102	0.137	FALSE	No_SigChange	intron	intron (NM_023514, intron 1 of 10)	5227	NM_023514	Mrps9	0.016736	0.466667	intron	intron	intron	Other
chr1	42905330	42905480	4.37	2.46	5.16	-2.7	3.2e-07	7.36e-06	TRUE	SigIncrease	1.7	2.46	0	2.46	0.0361	0.0829	FALSE	No_SigChange	4.47	5.16	3.09	2.07	6.5e-06	3.88e-05	TRUE	SigDecrease	2.81	2.46	3.09	-0.63	0.393	0.451	FALSE	No_SigChange	exon	exon (NM_023514, exon 11 of 11)	-47467	NM_053107	Gpr45	0.026846	0.533333	exon	exon	exon	Other
chr1	42906900	42907750	6.61	6.3	6.86	-0.56	0.0607	0.154	FALSE	No_SigChange	5.79	6.3	5	1.3	0.000613	0.00412	TRUE	SigDecrease	6.43	6.86	5.82	1.04	9.88e-05	0.000404	TRUE	SigDecrease	6.08	6.3	5.82	0.48	0.15	0.192	FALSE	No_SigChange	Intergenic	Intergenic	-45547	NM_053107	Gpr45	0.015312	0.510588	Intergenic	Intergenic	Intergenic	Other
chr1	42915060	42915430	6.01	5.77	6.22	-0.44	0.0893	0.205	FALSE	No_SigChange	5.92	5.77	6.05	-0.28	0.353	0.458	FALSE	No_SigChange	5.96	6.22	5.66	0.56	0.0262	0.0453	FALSE	No_SigChange	5.72	5.77	5.66	0.12	0.682	0.725	FALSE	No_SigChange	Intergenic	Intergenic	-37627	NM_053107	Gpr45	0.01084	0.405405	Intergenic	Intergenic	Intergenic	Other
chr1	42917940	42918470	7.13	7.38	6.81	0.57	0.00513	0.0228	FALSE	No_SigChange	7.14	7.38	6.84	0.54	0.0265	0.0664	FALSE	No_SigChange	6.52	6.81	6.14	0.67	0.005	0.0113	FALSE	No_SigChange	6.89	7.38	6.14	1.24	5.55e-07	2.5e-06	TRUE	SigDecrease	Intergenic	Intergenic	-34667	NM_053107	Gpr45	0.011342	0.439623	Intergenic	Intergenic	Intergenic	Other
chr1	42952450	42953740	8.79	8.64	8.93	-0.29	0.175	0.335	FALSE	No_SigChange	8.67	8.64	8.71	-0.07	0.784	0.84	FALSE	No_SigChange	8.77	8.93	8.6	0.33	0.215	0.272	FALSE	No_SigChange	8.62	8.64	8.6	0.04	0.878	0.898	FALSE	No_SigChange	5'UTR	5' UTR (NM_053107, exon 1 of 2)	223	NM_053107	Gpr45	0.069822	0.652713	5'UTR	5'UTR	5'UTR	Other
chr1	43051910	43052260	5.61	5.51	5.71	-0.2	0.455	0.636	FALSE	No_SigChange	5.66	5.51	5.8	-0.29	0.338	0.442	FALSE	No_SigChange	5.14	5.7	4.19	1.52	6.28e-06	3.76e-05	TRUE	SigDecrease	4.99	5.51	4.19	1.32	0.000423	0.00102	TRUE	SigDecrease	intron	intron (NM_001013025, intron 11 of 12)	46537	NM_001013025	Tgfbrap1	0.014327	0.557143	intron	intron	intron	Other
chr1	43065920	43066320	6.08	6.25	5.88	0.37	0.128	0.268	FALSE	No_SigChange	5.95	6.25	5.57	0.68	0.0121	0.038	FALSE	No_SigChange	5.66	5.88	5.39	0.49	0.0692	0.103	FALSE	No_SigChange	5.88	6.25	5.39	0.85	0.00129	0.00275	TRUE	SigDecrease	intron	intron (NM_001013025, intron 5 of 12)	32502	NM_001013025	Tgfbrap1	0.012531	0.5275	intron	intron	intron	Other
chr1	43091720	43093130	8.88	8.86	8.89	-0.02	0.913	0.954	FALSE	No_SigChange	8.51	8.86	8.04	0.82	0.00184	0.00951	TRUE	SigDecrease	8.55	8.88	8.11	0.77	0.00558	0.0124	FALSE	No_SigChange	8.53	8.86	8.11	0.75	0.00984	0.0169	FALSE	No_SigChange	intron	CpG	6197	NM_001013025	Tgfbrap1	0.07736	0.638298	CpG	CpG	CpG	Other
chr1	43098240	43099140	8.97	9	8.95	0.06	0.786	0.881	FALSE	No_SigChange	8.78	9	8.52	0.48	0.0727	0.138	FALSE	No_SigChange	8.66	8.94	8.31	0.63	0.0133	0.0256	FALSE	No_SigChange	8.7	9	8.31	0.69	0.00557	0.0102	FALSE	No_SigChange	promoter-TSS	promoter-TSS (NM_133818)	-20	NM_133818	AI597479	0.064516	0.612222	promoter-TSS	promoter-TSS	promoter-TSS	Other
chr1	43110710	43110950	5.72	5.46	5.94	-0.48	0.0759	0.182	FALSE	No_SigChange	5.45	5.46	5.44	0.02	0.962	0.974	FALSE	No_SigChange	5.59	5.94	5.14	0.8	0.00389	0.00913	TRUE	SigDecrease	5.31	5.46	5.14	0.32	0.292	0.348	FALSE	No_SigChange	intron	intron (NM_133818, intron 2 of 3)	12120	NM_133818	AI597479	0.008368	0.4375	intron	intron	intron	Other
chr1	43128290	43128540	4.72	5.29	3.78	1.5	0.00054	0.00372	TRUE	SigDecrease	5.07	5.28	4.82	0.46	0.233	0.332	FALSE	No_SigChange	3.41	3.78	2.91	0.87	0.185	0.239	FALSE	No_SigChange	4.54	5.28	2.91	2.38	4.28e-06	1.6e-05	TRUE	SigDecrease	exon	exon (NM_010212, exon 5 of 6)	29705	NM_133818	AI597479	0.016064	0.528	exon	exon	exon	Other
chr1	43138260	43138880	5.92	5.77	6.06	-0.29	0.244	0.421	FALSE	No_SigChange	6.01	5.77	6.21	-0.44	0.0943	0.167	FALSE	No_SigChange	6.1	6.06	6.14	-0.08	0.742	0.784	FALSE	No_SigChange	5.97	5.77	6.14	-0.37	0.157	0.201	FALSE	No_SigChange	intron	intron (NM_001289533, intron 3 of 5)	25391	NM_010212	Fhl2	0.024233	0.490323	intron	intron	intron	Other
chr1	43139580	43140020	6.8	6.61	6.96	-0.35	0.0853	0.198	FALSE	No_SigChange	6.62	6.61	6.63	-0.01	0.962	0.974	FALSE	No_SigChange	6.8	6.96	6.61	0.35	0.139	0.187	FALSE	No_SigChange	6.61	6.61	6.61	0	0.995	0.997	FALSE	No_SigChange	intron	intron (NM_001289533, intron 3 of 5)	24161	NM_010212	Fhl2	0.01139	0.490909	intron	intron	intron	Other
chr1	43163290	43164480	8.08	8.29	7.84	0.45	0.0305	0.0914	FALSE	No_SigChange	8.19	8.28	8.08	0.21	0.415	0.519	FALSE	No_SigChange	7.58	7.84	7.27	0.56	0.0302	0.0512	FALSE	No_SigChange	7.87	8.28	7.27	1.01	0.000238	0.000607	TRUE	SigDecrease	promoter-TSS	promoter-TSS (NM_010212)	76	NM_010212	Fhl2	0.053827	0.602521	promoter-TSS	promoter-TSS	promoter-TSS	Other
chr1	43167920	43169010	6.67	6.93	6.35	0.59	0.0184	0.0621	FALSE	No_SigChange	7.22	6.93	7.45	-0.52	0.0701	0.134	FALSE	No_SigChange	6.46	6.35	6.56	-0.21	0.433	0.498	FALSE	No_SigChange	6.76	6.93	6.56	0.37	0.173	0.219	FALSE	No_SigChange	Intergenic	intron (NM_001289533, intron 1 of 5)	-4504	NM_010212	Fhl2	0.016529	0.525688	intron	intron	intron	Other
chr1	43186110	43186850	7.62	7.46	7.77	-0.31	0.119	0.253	FALSE	No_SigChange	7.14	7.45	6.73	0.73	0.00675	0.0249	FALSE	No_SigChange	7.41	7.77	6.93	0.83	0.000194	0.00072	TRUE	SigDecrease	7.22	7.45	6.93	0.52	0.0308	0.0468	FALSE	No_SigChange	Intergenic	intron (NM_001289533, intron 1 of 5)	-22519	NM_010212	Fhl2	0.014885	0.516216	intron	intron	intron	Other
chr1	43225840	43226240	6.03	5.98	6.08	-0.09	0.737	0.849	FALSE	No_SigChange	5.59	5.98	5.05	0.93	0.00193	0.00988	TRUE	SigDecrease	5.47	6.07	4.43	1.65	4.83e-07	4.03e-06	TRUE	SigDecrease	5.4	5.98	4.43	1.56	7.76e-07	3.4e-06	TRUE	SigDecrease	Intergenic	ID_B1|SINE|B4	-62079	NM_010212	Fhl2	0.017544	0.485	ID_B1	B4	SINE	SINE
chr1	43264440	43264790	5.9	5.83	5.96	-0.13	0.622	0.77	FALSE	No_SigChange	5.73	5.83	5.62	0.21	0.482	0.583	FALSE	No_SigChange	5.7	5.96	5.39	0.57	0.0451	0.072	FALSE	No_SigChange	5.63	5.83	5.39	0.44	0.142	0.183	FALSE	No_SigChange	Intergenic	Intergenic	-100654	NM_010212	Fhl2	0.011461	0.474286	Intergenic	Intergenic	Intergenic	Other
chr1	43269470	43269950	6.37	6.38	6.35	0.03	0.876	0.934	FALSE	No_SigChange	6.41	6.38	6.43	-0.05	0.847	0.889	FALSE	No_SigChange	6.28	6.35	6.21	0.13	0.599	0.656	FALSE	No_SigChange	6.3	6.38	6.21	0.17	0.491	0.548	FALSE	No_SigChange	Intergenic	Intergenic	-105749	NM_010212	Fhl2	0.025052	0.5	Intergenic	Intergenic	Intergenic	Other
chr1	43291880	43292200	5.56	5.45	5.66	-0.21	0.448	0.629	FALSE	No_SigChange	5.37	5.45	5.29	0.16	0.618	0.703	FALSE	No_SigChange	5.55	5.66	5.43	0.23	0.415	0.48	FALSE	No_SigChange	5.44	5.45	5.43	0.02	0.94	0.95	FALSE	No_SigChange	Intergenic	Intergenic	-128079	NM_010212	Fhl2	0.028213	0.534375	Intergenic	Intergenic	Intergenic	Other
chr1	43299470	43299850	5.31	5.39	5.22	0.17	0.555	0.719	FALSE	No_SigChange	5.38	5.39	5.37	0.02	0.96	0.973	FALSE	No_SigChange	5.05	5.22	4.87	0.35	0.252	0.312	FALSE	No_SigChange	5.15	5.39	4.87	0.52	0.101	0.135	FALSE	No_SigChange	Intergenic	Intergenic	-135699	NM_010212	Fhl2	0.010554	0.421053	Intergenic	Intergenic	Intergenic	Other
chr1	43396600	43396790	5.38	5.08	5.63	-0.55	0.0627	0.158	FALSE	No_SigChange	4.64	5.08	4.02	1.05	0.0114	0.0363	FALSE	No_SigChange	5.04	5.63	4.02	1.61	1.48e-05	7.89e-05	TRUE	SigDecrease	4.64	5.07	4.02	1.05	0.0121	0.0204	FALSE	No_SigChange	Intergenic	Intergenic	-49056	NM_010879	Nck2	0.010582	0.505263	Intergenic	Intergenic	Intergenic	Other
chr1	43423340	43423600	4.64	5.04	4.09	0.96	0.00971	0.0377	FALSE	No_SigChange	5.29	5.04	5.51	-0.46	0.218	0.316	FALSE	No_SigChange	4.61	4.09	4.99	-0.9	0.0225	0.04	FALSE	No_SigChange	5.02	5.04	4.99	0.05	0.885	0.904	FALSE	No_SigChange	Intergenic	Intergenic	-22281	NM_010879	Nck2	0.007722	0.446154	Intergenic	Intergenic	Intergenic	Other
chr1	43432110	43432310	2.52	0	3.39	-3.39	0.000463	0.00329	TRUE	SigIncrease	2.04	0	2.86	-2.86	0.00775	0.0275	FALSE	No_SigChange	4.35	3.39	4.92	-1.53	0.000142	0.000552	TRUE	SigIncrease	3.96	0	4.92	-4.92	2.31e-09	1.74e-08	TRUE	SigIncrease	Intergenic	Intergenic	-13541	NM_010879	Nck2	0.005025	0.46	Intergenic	Intergenic	Intergenic	Other
chr1	43444290	43447120	9.89	9.83	9.95	-0.12	0.566	0.727	FALSE	No_SigChange	9.65	9.83	9.45	0.38	0.139	0.224	FALSE	No_SigChange	9.69	9.95	9.38	0.57	0.0188	0.0343	FALSE	No_SigChange	9.62	9.83	9.38	0.45	0.0572	0.0812	FALSE	No_SigChange	promoter-TSS	promoter-TSS (NM_010879)	-46	NM_010879	Nck2	0.057264	0.573852	promoter-TSS	promoter-TSS	promoter-TSS	Other
chr1	43470470	43470850	4.51	3.61	5.05	-1.44	0.000467	0.00331	TRUE	SigIncrease	4.55	3.61	5.11	-1.5	0.000345	0.00265	TRUE	SigIncrease	5.29	5.05	5.49	-0.44	0.174	0.227	FALSE	No_SigChange	4.84	3.61	5.49	-1.88	3.38e-06	1.3e-05	TRUE	SigIncrease	intron	B4A|SINE|B4	24909	NM_010879	Nck2	0.005277	0.476316	B4A	B4	SINE	SINE
chr1	43472220	43472510	5.29	5.02	5.52	-0.49	0.0815	0.192	FALSE	No_SigChange	4.97	5.02	4.92	0.1	0.764	0.824	FALSE	No_SigChange	4.72	5.51	2.81	2.71	8.95e-11	2.07e-09	TRUE	SigDecrease	4.3	5.02	2.81	2.21	3.69e-06	1.4e-05	TRUE	SigDecrease	intron	intron (NM_010879, intron 1 of 4)	26614	NM_010879	Nck2	0.017301	0.503448	intron	intron	intron	Other
chr1	43511270	43511750	6.45	6.01	6.79	-0.79	0.00533	0.0234	FALSE	No_SigChange	6.04	6	6.08	-0.07	0.795	0.849	FALSE	No_SigChange	6.68	6.79	6.55	0.24	0.427	0.492	FALSE	No_SigChange	6.3	6	6.55	-0.55	0.0275	0.0424	FALSE	No_SigChange	intron	intron (NM_010879, intron 2 of 4)	65759	NM_010879	Nck2	0.02714	0.495833	intron	intron	intron	Other
chr1	43571030	43571490	6.53	6.2	6.8	-0.6	0.00719	0.0297	FALSE	No_SigChange	5.51	6.2	4.15	2.05	1e-09	8.25e-08	TRUE	SigDecrease	6.25	6.8	5.36	1.44	4.1e-08	4.64e-07	TRUE	SigDecrease	5.84	6.2	5.36	0.85	0.00434	0.00813	TRUE	SigDecrease	TTS	TTS (NM_010879)	125509	NM_010879	Nck2	0.008715	0.478261	TTS	TTS	TTS	Other
chr1	43730500	43731120	7.29	7.53	7	0.54	0.0157	0.0549	FALSE	No_SigChange	7.22	7.53	6.83	0.71	0.0139	0.0418	FALSE	No_SigChange	6.42	6.99	5.45	1.54	4.09e-06	2.6e-05	TRUE	SigDecrease	6.84	7.53	5.45	2.08	9.12e-10	7.59e-09	TRUE	SigDecrease	5'UTR	5' UTR (NM_024283, exon 1 of 4)	208	NM_024283	1500015O10Rik	0.030695	0.591935	5'UTR	5'UTR	5'UTR	Other
chr1	43738110	43738650	6.42	6.01	6.74	-0.74	0.00159	0.00891	TRUE	SigIncrease	6.07	6	6.13	-0.12	0.671	0.749	FALSE	No_SigChange	6.55	6.74	6.32	0.43	0.0843	0.122	FALSE	No_SigChange	6.17	6	6.32	-0.31	0.262	0.316	FALSE	No_SigChange	intron	B3|SINE|B2	7778	NM_024283	1500015O10Rik	0.016698	0.383333	B3	B2	SINE	SINE
chr1	43820660	43820990	5.6	5.81	5.34	0.47	0.074	0.179	FALSE	No_SigChange	5.19	5.81	4.09	1.72	4.5e-07	1.27e-05	TRUE	SigDecrease	5.2	5.34	5.05	0.28	0.38	0.445	FALSE	No_SigChange	5.48	5.81	5.05	0.76	0.0156	0.0255	FALSE	No_SigChange	intron	intron (NM_026430, intron 1 of 14)	6883	NM_026430	Uxs1	0.006079	0.451515	intron	intron	intron	Other
chr1	43826830	43828390	9.86	9.84	9.89	-0.04	0.819	0.901	FALSE	No_SigChange	9.67	9.84	9.47	0.37	0.15	0.238	FALSE	No_SigChange	9.67	9.88	9.42	0.46	0.043	0.0691	FALSE	No_SigChange	9.65	9.84	9.42	0.42	0.0476	0.0689	FALSE	No_SigChange	promoter-TSS	promoter-TSS (NM_026430)	98	NM_026430	Uxs1	0.074407	0.598077	promoter-TSS	promoter-TSS	promoter-TSS	Other
chr1	43882370	43883090	7.38	7.3	7.45	-0.16	0.432	0.615	FALSE	No_SigChange	7.25	7.3	7.2	0.1	0.682	0.758	FALSE	No_SigChange	7.16	7.45	6.8	0.65	0.00984	0.0199	FALSE	No_SigChange	7.07	7.29	6.8	0.49	0.0451	0.0658	FALSE	No_SigChange	Intergenic	RMER17B|LTR|ERVK	-51277	NM_009418	Tpp2	0.019471	0.565278	RMER17B	ERVK	LTR	LTR
chr1	43898890	43899990	8.11	8.04	8.17	-0.13	0.482	0.659	FALSE	No_SigChange	7.84	8.04	7.61	0.42	0.0749	0.141	FALSE	No_SigChange	8.01	8.17	7.84	0.33	0.158	0.209	FALSE	No_SigChange	7.94	8.04	7.84	0.2	0.381	0.439	FALSE	No_SigChange	Intergenic	Intergenic	-34567	NM_009418	Tpp2	0.021838	0.517273	Intergenic	Intergenic	Intergenic	Other
chr1	43933330	43934540	9.71	9.67	9.74	-0.07	0.737	0.849	FALSE	No_SigChange	9.54	9.67	9.4	0.27	0.28	0.383	FALSE	No_SigChange	9.5	9.74	9.22	0.51	0.0351	0.0581	FALSE	No_SigChange	9.46	9.67	9.22	0.44	0.0329	0.0496	FALSE	No_SigChange	promoter-TSS	promoter-TSS (NM_009418)	-72	NM_009418	Tpp2	0.076923	0.603306	promoter-TSS	promoter-TSS	promoter-TSS	Other
chr1	43966750	43967150	5.79	5.42	6.09	-0.67	0.0204	0.067	FALSE	No_SigChange	5.25	5.42	5.07	0.35	0.338	0.442	FALSE	No_SigChange	5.67	6.09	5.08	1.01	0.000154	0.000591	TRUE	SigDecrease	5.26	5.42	5.08	0.34	0.339	0.396	FALSE	No_SigChange	intron	Lx2B2|LINE|L1	32943	NM_009418	Tpp2	0.010025	0.4675	Lx2B2	L1	LINE	LINE
chr1	44034980	44035850	7.71	7.84	7.57	0.28	0.185	0.347	FALSE	No_SigChange	7.53	7.84	7.13	0.71	0.0142	0.0425	FALSE	No_SigChange	7.15	7.56	6.56	1.01	9.3e-05	0.000384	TRUE	SigDecrease	7.34	7.84	6.56	1.28	1.42e-06	5.88e-06	TRUE	SigDecrease	Intergenic	RMER17B|LTR|ERVK	-15409	NM_001013799	Mettl21c	0.012658	0.571264	RMER17B	ERVK	LTR	LTR
chr1	44041830	44042530	7.04	6.96	7.12	-0.16	0.428	0.611	FALSE	No_SigChange	6.84	6.96	6.71	0.25	0.304	0.408	FALSE	No_SigChange	6.87	7.12	6.56	0.56	0.0214	0.0382	FALSE	No_SigChange	6.77	6.95	6.56	0.39	0.107	0.142	FALSE	No_SigChange	Intergenic	MER119|DNA|hAT-Charlie	-22174	NM_001013799	Mettl21c	0.02289	0.422857	MER119	hAT-Charlie	DNA	Other
chr1	44064770	44065010	5.4	5.19	5.58	-0.4	0.144	0.291	FALSE	No_SigChange	5.36	5.19	5.51	-0.32	0.295	0.399	FALSE	No_SigChange	5.53	5.58	5.47	0.12	0.672	0.722	FALSE	No_SigChange	5.33	5.19	5.47	-0.28	0.349	0.406	FALSE	No_SigChange	Intergenic	Intergenic	37498	NM_029368	Tex30	0.004184	0.404167	Intergenic	Intergenic	Intergenic	Other
chr1	44081500	44081650	3.85	2.32	4.57	-2.25	7.16e-05	0.000706	TRUE	SigIncrease	2.58	2.32	2.81	-0.49	0.544	0.639	FALSE	No_SigChange	4.23	4.57	3.78	0.79	0.0538	0.0835	FALSE	No_SigChange	3.23	2.32	3.78	-1.46	0.0252	0.0391	FALSE	No_SigChange	Intergenic	RLTR20C2_MM|LTR|ERVK	20813	NM_029368	Tex30	0.060403	0.56	RLTR20C2_MM	ERVK	LTR	LTR
chr1	44101640	44103230	9.47	9.42	9.52	-0.1	0.603	0.756	FALSE	No_SigChange	9.26	9.42	9.09	0.32	0.173	0.264	FALSE	No_SigChange	9.23	9.52	8.88	0.64	0.00787	0.0165	FALSE	No_SigChange	9.17	9.42	8.88	0.54	0.0213	0.0336	FALSE	No_SigChange	promoter-TSS	promoter-TSS (NM_029368)	-47	NM_029368	Tex30	0.072373	0.561635	promoter-TSS	promoter-TSS	promoter-TSS	Other
chr1	44118400	44120400	10.05	10.13	9.96	0.17	0.403	0.589	FALSE	No_SigChange	9.91	10.13	9.64	0.49	0.041	0.0908	FALSE	No_SigChange	9.67	9.96	9.31	0.65	0.0167	0.031	FALSE	No_SigChange	9.78	10.13	9.31	0.82	0.00144	0.00304	TRUE	SigDecrease	promoter-TSS	promoter-TSS (NM_023645)	-568	NM_144558	Bivm	0.041521	0.571	promoter-TSS	promoter-TSS	promoter-TSS	Other
chr1	44147330	44148910	9.45	9.45	9.44	0.01	0.956	0.977	FALSE	No_SigChange	9.31	9.45	9.15	0.3	0.213	0.31	FALSE	No_SigChange	9.26	9.44	9.05	0.39	0.132	0.18	FALSE	No_SigChange	9.26	9.45	9.05	0.4	0.101	0.135	FALSE	No_SigChange	exon	exon (NM_011729, exon 1 of 15)	376	NM_011729	Ercc5	0.051932	0.505696	exon	exon	exon	Other
chr1	44155340	44155710	4.48	3.29	5.13	-1.84	3.62e-05	0.000402	TRUE	SigIncrease	3.6	3.28	3.86	-0.57	0.328	0.432	FALSE	No_SigChange	4.79	5.13	4.34	0.79	0.0261	0.0451	FALSE	No_SigChange	3.91	3.28	4.34	-1.06	0.0542	0.0774	FALSE	No_SigChange	intron	intron (NM_011729, intron 1 of 14)	7781	NM_011729	Ercc5	0.00542	0.386486	intron	intron	intron	Other
chr1	44173780	44174190	5.32	4.86	5.67	-0.81	0.00826	0.0332	FALSE	No_SigChange	4.56	4.86	4.19	0.67	0.113	0.192	FALSE	No_SigChange	4.75	5.67	1.46	4.21	1.79e-14	1.14e-12	TRUE	SigDecrease	3.99	4.86	1.46	3.4	8.99e-08	4.8e-07	TRUE	SigDecrease	exon	exon (NM_011729, exon 10 of 15)	26241	NM_011729	Ercc5	0.017115	0.473171	exon	exon	exon	Other
chr1	44198290	44199010	6.86	7.1	6.57	0.52	0.0216	0.0701	FALSE	No_SigChange	7.04	7.1	6.99	0.11	0.7	0.772	FALSE	No_SigChange	6.09	6.57	5.36	1.21	1.49e-05	7.96e-05	TRUE	SigDecrease	6.47	7.1	5.36	1.74	2.35e-09	1.77e-08	TRUE	SigDecrease	Intergenic	Intergenic	20281	NM_207281	Mettl21e	0.054242	0.541667	Intergenic	Intergenic	Intergenic	Other
chr1	44244780	44245160	5.52	5.97	4.87	1.1	0.000228	0.00184	TRUE	SigDecrease	6.34	5.96	6.64	-0.68	0.019	0.0523	FALSE	No_SigChange	5.21	4.87	5.49	-0.62	0.0429	0.069	FALSE	No_SigChange	5.75	5.96	5.49	0.47	0.114	0.151	FALSE	No_SigChange	Intergenic	L1_Mus1|LINE|L1	-26039	NM_207281	Mettl21e	0.021108	0.521053	L1_Mus1	L1	LINE	LINE
chr1	44331750	44332250	6.02	5.92	6.11	-0.19	0.431	0.614	FALSE	No_SigChange	5.86	5.92	5.81	0.11	0.701	0.773	FALSE	No_SigChange	6.12	6.11	6.13	-0.02	0.933	0.946	FALSE	No_SigChange	6.03	5.92	6.13	-0.22	0.453	0.511	FALSE	No_SigChange	Intergenic	RLTR9E|LTR|ERVK	-113069	NM_207281	Mettl21e	0.008016	0.436	RLTR9E	ERVK	LTR	LTR
chr1	44409240	44409540	3.48	3.25	3.67	-0.42	0.478	0.656	FALSE	No_SigChange	4.55	3.25	5.22	-1.97	3.46e-06	6.7e-05	TRUE	SigIncrease	4.73	3.67	5.33	-1.66	0.000147	0.000569	TRUE	SigIncrease	4.64	3.25	5.33	-2.08	4.38e-06	1.64e-05	TRUE	SigIncrease	Intergenic	Intergenic	-142281	NM_028450	Gulp1	0	0.46	Intergenic	Intergenic	Intergenic	Other
chr1	44540150	44540300	4.29	4.64	3.81	0.84	0.0474	0.128	FALSE	No_SigChange	4.57	4.64	4.49	0.15	0.717	0.786	FALSE	No_SigChange	4.1	3.8	4.34	-0.53	0.214	0.271	FALSE	No_SigChange	4.5	4.64	4.34	0.3	0.457	0.515	FALSE	No_SigChange	Intergenic	Lx2|LINE|L1	-11446	NM_028450	Gulp1	0.006711	0.493333	Lx2	L1	LINE	LINE
chr1	44550460	44550820	4.18	4.6	3.58	1.02	0.045	0.123	FALSE	No_SigChange	5.12	4.6	5.51	-0.91	0.0211	0.0562	FALSE	No_SigChange	4.52	3.58	5.09	-1.5	0.00197	0.00516	TRUE	SigIncrease	4.86	4.6	5.09	-0.49	0.159	0.202	FALSE	No_SigChange	Intergenic	RMER13B|LTR|ERVK	-1031	NM_028450	Gulp1	0.011142	0.544444	RMER13B	ERVK	LTR	LTR
chr1	44551380	44552710	9.33	9.16	9.48	-0.32	0.117	0.25	FALSE	No_SigChange	9.05	9.16	8.94	0.22	0.362	0.467	FALSE	No_SigChange	9.09	9.47	8.57	0.9	0.00141	0.00387	TRUE	SigDecrease	8.89	9.16	8.57	0.59	0.0349	0.0523	FALSE	No_SigChange	intron	CpG	374	NM_028450	Gulp1	0.051919	0.606767	CpG	CpG	CpG	Other
chr1	44584770	44585240	6.18	6.22	6.13	0.09	0.698	0.823	FALSE	No_SigChange	6.41	6.22	6.58	-0.35	0.183	0.277	FALSE	No_SigChange	6.24	6.13	6.35	-0.23	0.364	0.429	FALSE	No_SigChange	6.29	6.22	6.35	-0.13	0.576	0.628	FALSE	No_SigChange	intron	intron (NM_028450, intron 1 of 10)	33334	NM_028450	Gulp1	0.004264	0.453191	intron	intron	intron	Other
chr1	44613070	44613990	8.06	7.98	8.14	-0.16	0.358	0.546	FALSE	No_SigChange	7.55	7.97	6.94	1.04	0.000134	0.00127	TRUE	SigDecrease	7.61	8.13	6.77	1.36	9.96e-09	1.34e-07	TRUE	SigDecrease	7.49	7.97	6.77	1.2	7.03e-07	3.11e-06	TRUE	SigDecrease	intron	RLTR25B|LTR|ERVK	61859	NM_028450	Gulp1	0.001088	0.397826	RLTR25B	ERVK	LTR	LTR
chr1	45313760	45314220	6.02	6.15	5.87	0.28	0.309	0.495	FALSE	No_SigChange	6.36	6.15	6.55	-0.39	0.122	0.202	FALSE	No_SigChange	5.9	5.87	5.93	-0.06	0.831	0.861	FALSE	No_SigChange	6.05	6.15	5.93	0.22	0.37	0.428	FALSE	No_SigChange	intron	intron (NM_009930, intron 1 of 50)	2452	NM_009930	Col3a1	0.008715	0.382609	intron	intron	intron	Other
chr1	45357810	45358560	7.19	7.21	7.17	0.04	0.853	0.921	FALSE	No_SigChange	6.84	7.21	6.36	0.84	0.00337	0.015	FALSE	No_SigChange	7.1	7.17	7.04	0.13	0.61	0.665	FALSE	No_SigChange	7.12	7.2	7.04	0.17	0.5	0.557	FALSE	No_SigChange	Intergenic	RLTR9D2|LTR|ERVK	46647	NM_009930	Col3a1	0.00534	0.478667	RLTR9D2	ERVK	LTR	LTR
chr1	45359770	45360140	6.07	6.31	5.78	0.53	0.0483	0.13	FALSE	No_SigChange	5.77	6.31	4.88	1.43	8.72e-06	0.000143	TRUE	SigDecrease	5.3	5.78	4.58	1.2	0.0015	0.00408	TRUE	SigDecrease	5.69	6.31	4.58	1.73	5.31e-07	2.4e-06	TRUE	SigDecrease	Intergenic	Lx|LINE|L1	48417	NM_009930	Col3a1	0.00542	0.489189	Lx	L1	LINE	LINE
chr1	45432050	45432210	5.11	5.03	5.19	-0.16	0.642	0.785	FALSE	No_SigChange	4.99	5.03	4.94	0.09	0.787	0.843	FALSE	No_SigChange	4.93	5.19	4.63	0.56	0.111	0.154	FALSE	No_SigChange	4.84	5.03	4.63	0.4	0.241	0.293	FALSE	No_SigChange	intron	intron (NM_007737, intron 6 of 53)	71152	NM_007737	Col5a2	0.018868	0.45	intron	intron	intron	Other
chr1	45502250	45503320	7.57	7.31	7.79	-0.48	0.0261	0.0809	FALSE	No_SigChange	7.24	7.31	7.16	0.15	0.591	0.68	FALSE	No_SigChange	7.46	7.78	7.05	0.73	0.0134	0.0258	FALSE	No_SigChange	7.19	7.31	7.05	0.26	0.369	0.427	FALSE	No_SigChange	intron	intron (NM_007737, intron 1 of 53)	497	NM_007737	Col5a2	0.021515	0.46729	intron	intron	intron	Other
chr1	45575010	45575460	6.29	6.47	6.1	0.37	0.103	0.229	FALSE	No_SigChange	6.21	6.47	5.9	0.57	0.0236	0.0611	FALSE	No_SigChange	5.89	6.1	5.65	0.45	0.106	0.148	FALSE	No_SigChange	6.11	6.47	5.65	0.82	0.00179	0.00369	TRUE	SigDecrease	Intergenic	RLTR9F|LTR|ERVK	-71953	NM_007737	Col5a2	0.008909	0.488889	RLTR9F	ERVK	LTR	LTR
chr1	45580580	45580920	5.68	6.21	4.83	1.38	8.99e-05	0.000851	TRUE	SigDecrease	5.94	6.21	5.61	0.6	0.107	0.184	FALSE	No_SigChange	4.52	4.83	4.13	0.7	0.0909	0.13	FALSE	No_SigChange	5.52	6.21	4.13	2.08	1.76e-07	8.85e-07	TRUE	SigDecrease	Intergenic	RLTR53B_Mm|LTR|ERVK	-77468	NM_007737	Col5a2	0.00295	0.391176	RLTR53B_Mm	ERVK	LTR	LTR
chr1	45672770	45673010	5.3	5.5	5.08	0.42	0.223	0.396	FALSE	No_SigChange	5.48	5.5	5.46	0.04	0.902	0.931	FALSE	No_SigChange	4.75	5.07	4.32	0.75	0.077	0.113	FALSE	No_SigChange	5.03	5.5	4.32	1.18	0.00399	0.00755	TRUE	SigDecrease	Intergenic	Intergenic	-122611	NM_028599	Wdr75	0.012552	0.466667	Intergenic	Intergenic	Intergenic	Other
chr1	45766180	45766400	5.07	5.12	5.01	0.11	0.745	0.855	FALSE	No_SigChange	4.91	5.12	4.67	0.45	0.214	0.311	FALSE	No_SigChange	5.08	5.01	5.14	-0.13	0.725	0.769	FALSE	No_SigChange	5.13	5.12	5.14	-0.02	0.955	0.964	FALSE	No_SigChange	Intergenic	Intergenic	-29211	NM_028599	Wdr75	0.018265	0.35	Intergenic	Intergenic	Intergenic	Other
chr1	45794750	45795860	9.28	9.34	9.21	0.13	0.473	0.651	FALSE	No_SigChange	9.21	9.34	9.07	0.27	0.215	0.313	FALSE	No_SigChange	9.04	9.21	8.85	0.36	0.148	0.198	FALSE	No_SigChange	9.11	9.34	8.85	0.49	0.0411	0.0605	FALSE	No_SigChange	promoter-TSS	promoter-TSS (NM_028599)	-196	NM_028599	Wdr75	0.06312	0.572072	promoter-TSS	promoter-TSS	promoter-TSS	Other
chr1	45816870	45817140	5.45	5.27	5.61	-0.35	0.194	0.36	FALSE	No_SigChange	4.97	5.27	4.6	0.67	0.0408	0.0904	FALSE	No_SigChange	5.34	5.61	5	0.61	0.0792	0.116	FALSE	No_SigChange	5.14	5.26	5	0.27	0.477	0.534	FALSE	No_SigChange	intron	intron (NM_028599, intron 13 of 20)	21504	NM_028599	Wdr75	0.003717	0.392593	intron	intron	intron	Other
chr1	45824710	45825520	6.65	6.53	6.77	-0.24	0.262	0.442	FALSE	No_SigChange	6.27	6.53	5.96	0.57	0.0414	0.0914	FALSE	No_SigChange	6.52	6.77	6.22	0.55	0.0363	0.0597	FALSE	No_SigChange	6.38	6.53	6.22	0.31	0.27	0.324	FALSE	No_SigChange	Intergenic	Intergenic	29614	NM_028599	Wdr75	0.011125	0.433333	Intergenic	Intergenic	Intergenic	Other
chr1	45866780	45867070	5.2	5.92	3.73	2.19	4.19e-08	1.29e-06	TRUE	SigDecrease	5.97	5.92	6.02	-0.1	0.788	0.843	FALSE	No_SigChange	2.88	3.73	0.58	3.14	0.000154	0.000593	TRUE	SigDecrease	4.95	5.92	0.58	5.33	1.19e-14	2.92e-13	TRUE	SigDecrease	Intergenic	Intergenic	58669	NM_016917	Slc40a1	0	0.431034	Intergenic	Intergenic	Intergenic	Other
chr1	45883110	45883850	6.53	6.02	6.91	-0.9	6.8e-05	0.000677	TRUE	SigIncrease	5.59	6.02	4.98	1.04	0.000652	0.00432	TRUE	SigDecrease	6.26	6.91	5.02	1.89	1.03e-09	1.82e-08	TRUE	SigDecrease	5.6	6.01	5.02	0.99	0.00426	0.008	TRUE	SigDecrease	Intergenic	Lx|LINE|L1	42114	NM_016917	Slc40a1	0.00406	0.451351	Lx	L1	LINE	LINE
chr1	45905240	45905420	4.68	4.32	4.97	-0.64	0.0708	0.173	FALSE	No_SigChange	4.29	4.32	4.27	0.05	0.902	0.931	FALSE	No_SigChange	4.58	4.96	4.06	0.9	0.0262	0.0453	FALSE	No_SigChange	4.2	4.32	4.06	0.25	0.574	0.626	FALSE	No_SigChange	Intergenic	Intergenic	20264	NM_016917	Slc40a1	0.01676	0.522222	Intergenic	Intergenic	Intergenic	Other
chr1	45925240	45926760	9.65	9.7	9.59	0.11	0.587	0.743	FALSE	No_SigChange	9.46	9.7	9.17	0.53	0.0427	0.0934	FALSE	No_SigChange	9.12	9.59	8.41	1.18	4.65e-06	2.91e-05	TRUE	SigDecrease	9.19	9.7	8.41	1.29	7.33e-07	3.23e-06	TRUE	SigDecrease	promoter-TSS	promoter-TSS (NM_016917)	-406	NM_016917	Slc40a1	0.044108	0.559868	promoter-TSS	promoter-TSS	promoter-TSS	Other
chr1	46018540	46018760	4.97	5.21	4.67	0.54	0.121	0.257	FALSE	No_SigChange	5.31	5.21	5.4	-0.19	0.585	0.675	FALSE	No_SigChange	4.65	4.67	4.63	0.04	0.91	0.928	FALSE	No_SigChange	4.95	5.21	4.63	0.58	0.0837	0.114	FALSE	No_SigChange	Intergenic	Intergenic	11787	NR_037691	Gm4776	0	0.472727	Intergenic	Intergenic	Intergenic	Other
chr1	46022300	46022510	4.95	4.94	4.97	-0.02	0.942	0.97	FALSE	No_SigChange	4.96	4.94	4.98	-0.04	0.918	0.942	FALSE	No_SigChange	4.79	4.96	4.58	0.38	0.258	0.32	FALSE	No_SigChange	4.77	4.94	4.58	0.36	0.315	0.371	FALSE	No_SigChange	intron	intron (NR_037690, intron 2 of 2)	8032	NR_037691	Gm4776	0.004785	0.466667	intron	intron	intron	Other
chr1	46066560	46067200	7.99	8.3	7.6	0.7	0.00157	0.00881	TRUE	SigDecrease	8.14	8.3	7.98	0.32	0.25	0.35	FALSE	No_SigChange	7.41	7.6	7.19	0.41	0.0901	0.129	FALSE	No_SigChange	7.85	8.3	7.19	1.1	5.12e-05	0.000152	TRUE	SigDecrease	intron	intron (NM_001160386, intron 1 of 65)	142	NM_001160386	Dnah7b	0.042254	0.567187	intron	intron	intron	Other
chr1	46088830	46089360	5.53	6.16	4.37	1.79	1.38e-07	3.58e-06	TRUE	SigDecrease	6.04	6.16	5.91	0.26	0.408	0.513	FALSE	No_SigChange	4.24	4.37	4.09	0.29	0.529	0.59	FALSE	No_SigChange	5.47	6.16	4.09	2.08	4.21e-08	2.41e-07	TRUE	SigDecrease	intron	G-rich|Low_complexity|Low_complexity	22357	NM_001160386	Dnah7b	0.122873	0.767925	G-rich	Low_complexity	Low_complexity	Other
chr1	46425320	46425840	6.74	7.03	6.37	0.65	0.00458	0.0208	FALSE	No_SigChange	6.88	7.03	6.72	0.31	0.233	0.332	FALSE	No_SigChange	6.36	6.37	6.35	0.02	0.915	0.931	FALSE	No_SigChange	6.73	7.03	6.35	0.68	0.00823	0.0144	FALSE	No_SigChange	Intergenic	CpG	358842	NM_001160386	Dnah7b	0.04817	0.592308	CpG	CpG	CpG	Other
chr1	46849880	46850250	6.39	6.51	6.25	0.26	0.305	0.49	FALSE	No_SigChange	6.23	6.51	5.89	0.62	0.0247	0.0632	FALSE	No_SigChange	6.32	6.25	6.38	-0.13	0.632	0.686	FALSE	No_SigChange	6.45	6.51	6.38	0.13	0.606	0.657	FALSE	No_SigChange	intron	intron (NM_172653, intron 1 of 9)	3444	NM_172653	Slc39a10	0.00542	0.408108	intron	intron	intron	Other
chr1	46852470	46854280	10.32	10.31	10.34	-0.03	0.876	0.933	FALSE	No_SigChange	10.19	10.31	10.06	0.24	0.257	0.358	FALSE	No_SigChange	10.18	10.33	10	0.33	0.155	0.206	FALSE	No_SigChange	10.16	10.31	10	0.3	0.148	0.19	FALSE	No_SigChange	intron	CpG	134	NM_172653	Slc39a10	0.098397	0.637017	CpG	CpG	CpG	Other
chr1	46856480	46856760	5.72	6.24	4.89	1.35	3.75e-06	5.99e-05	TRUE	SigDecrease	5.84	6.24	5.29	0.96	0.00644	0.0241	FALSE	No_SigChange	4.37	4.89	3.55	1.34	0.00188	0.00494	TRUE	SigDecrease	5.45	6.24	3.55	2.69	6.37e-16	2.07e-14	TRUE	SigDecrease	Intergenic	Intergenic	-3111	NM_172653	Slc39a10	0.010753	0.442857	Intergenic	Intergenic	Intergenic	Other
chr1	46885290	46885710	5.97	5.86	6.08	-0.22	0.385	0.571	FALSE	No_SigChange	5.43	5.86	4.81	1.05	0.00177	0.00925	TRUE	SigDecrease	5.73	6.08	5.27	0.81	0.00393	0.00922	TRUE	SigDecrease	5.59	5.86	5.27	0.59	0.042	0.0617	FALSE	No_SigChange	Intergenic	Intergenic	-31991	NM_172653	Slc39a10	0.00716	0.438095	Intergenic	Intergenic	Intergenic	Other
chr1	46887960	46888320	5.63	5.78	5.46	0.32	0.245	0.423	FALSE	No_SigChange	5.39	5.78	4.85	0.93	0.00587	0.0225	FALSE	No_SigChange	5.03	5.46	4.41	1.05	0.00135	0.00373	TRUE	SigDecrease	5.25	5.78	4.41	1.37	5.98e-05	0.000175	TRUE	SigDecrease	Intergenic	Intergenic	-34631	NM_172653	Slc39a10	0.013928	0.413889	Intergenic	Intergenic	Intergenic	Other
chr1	46894080	46894910	8.36	8.48	8.22	0.26	0.177	0.337	FALSE	No_SigChange	8.15	8.48	7.72	0.76	0.00508	0.0202	FALSE	No_SigChange	7.61	8.22	6.51	1.71	5.06e-13	2.16e-11	TRUE	SigDecrease	7.81	8.48	6.51	1.97	1.47e-18	8.5e-17	TRUE	SigDecrease	Intergenic	Intergenic	-40986	NM_172653	Slc39a10	0.008444	0.49759	Intergenic	Intergenic	Intergenic	Other
chr1	46905060	46905380	5.12	3.52	5.86	-2.34	3.63e-09	1.59e-07	TRUE	SigIncrease	3.04	3.52	2.32	1.2	0.0761	0.143	FALSE	No_SigChange	5.44	5.86	4.83	1.03	0.00323	0.00783	TRUE	SigDecrease	4.32	3.52	4.83	-1.31	0.00443	0.0083	TRUE	SigIncrease	Intergenic	ORR1E|LTR|ERVL-MaLR	-51711	NM_172653	Slc39a10	0.037618	0.55625	ORR1E	ERVL-MaLR	LTR	LTR
chr1	46914420	46914640	5.96	6	5.91	0.09	0.717	0.836	FALSE	No_SigChange	5.76	6	5.48	0.51	0.0704	0.135	FALSE	No_SigChange	5.85	5.91	5.78	0.13	0.629	0.682	FALSE	No_SigChange	5.89	6	5.78	0.22	0.401	0.459	FALSE	No_SigChange	Intergenic	B3|SINE|B2	-61021	NM_172653	Slc39a10	0	0.490909	B3	B2	SINE	SINE
chr1	46921590	46922100	7.06	6.81	7.27	-0.45	0.0377	0.107	FALSE	No_SigChange	6.45	6.81	5.97	0.85	0.00836	0.0291	FALSE	No_SigChange	7.08	7.26	6.87	0.39	0.113	0.157	FALSE	No_SigChange	6.84	6.81	6.87	-0.06	0.832	0.859	FALSE	No_SigChange	Intergenic	Intergenic	-68336	NM_172653	Slc39a10	0.001965	0.413725	Intergenic	Intergenic	Intergenic	Other
chr1	47076510	47076690	5.14	5.1	5.19	-0.09	0.754	0.86	FALSE	No_SigChange	4.7	5.1	4.15	0.95	0.0152	0.0445	FALSE	No_SigChange	4.78	5.19	4.21	0.98	0.0237	0.0417	FALSE	No_SigChange	4.72	5.1	4.21	0.89	0.0506	0.0729	FALSE	No_SigChange	Intergenic	RLTR9E|LTR|ERVK	-223091	NM_172653	Slc39a10	0.01676	0.527778	RLTR9E	ERVK	LTR	LTR
chr1	47181540	47181730	3.32	4.09	1.58	2.5	0.000403	0.00293	TRUE	SigDecrease	4.43	4.09	4.7	-0.61	0.187	0.281	FALSE	No_SigChange	2.49	1.58	3.04	-1.46	0.101	0.143	FALSE	No_SigChange	3.66	4.09	3.04	1.04	0.0864	0.118	FALSE	No_SigChange	Intergenic	L1_Mus1|LINE|L1	-328126	NM_172653	Slc39a10	0.026455	0.552632	L1_Mus1	L1	LINE	LINE
chr1	47488560	47488850	4.47	3.49	5.04	-1.55	0.000211	0.00172	TRUE	SigIncrease	4.09	3.49	4.51	-1.02	0.0238	0.0615	FALSE	No_SigChange	5.27	5.04	5.47	-0.42	0.217	0.275	FALSE	No_SigChange	4.79	3.49	5.47	-1.98	1.87e-06	7.58e-06	TRUE	SigIncrease	Intergenic	RLTR9B2|LTR|ERVK	-635196	NM_172653	Slc39a10	0.013841	0.455172	RLTR9B2	ERVK	LTR	LTR
chr1	47720960	47721650	4.44	5.14	3.04	2.1	3.26e-06	5.34e-05	TRUE	SigDecrease	5.45	5.14	5.71	-0.58	0.0489	0.103	FALSE	No_SigChange	4.16	3.04	4.78	-1.74	0.000865	0.00257	TRUE	SigIncrease	4.97	5.14	4.78	0.36	0.318	0.375	FALSE	No_SigChange	Intergenic	L1Md_T|LINE|L1	-867796	NM_172653	Slc39a10	0.05225	0.578261	L1Md_T	L1	LINE	LINE
chr1	47834180	47834380	5.51	5.18	5.78	-0.6	0.0506	0.134	FALSE	No_SigChange	4.62	5.18	3.7	1.48	0.000273	0.00221	TRUE	SigDecrease	5.36	5.78	4.77	1.01	0.00365	0.00866	TRUE	SigDecrease	4.99	5.18	4.77	0.41	0.266	0.32	FALSE	No_SigChange	Intergenic	ORR1C2-int|LTR|ERVL-MaLR	-980771	NM_172653	Slc39a10	0	0.425	ORR1C2-int	ERVL-MaLR	LTR	LTR
chr1	47914190	47914820	7.3	7.57	6.95	0.62	0.00782	0.0318	FALSE	No_SigChange	7.08	7.57	6.31	1.26	1.37e-07	4.82e-06	TRUE	SigDecrease	6.43	6.95	5.61	1.34	1.24e-06	9.21e-06	TRUE	SigDecrease	6.9	7.57	5.61	1.96	5.98e-15	1.57e-13	TRUE	SigDecrease	Intergenic	Intergenic	-1060996	NM_172653	Slc39a10	0.004769	0.473016	Intergenic	Intergenic	Intergenic	Other
chr1	47929830	47930160	5.54	5.42	5.66	-0.24	0.433	0.616	FALSE	No_SigChange	5.55	5.42	5.67	-0.26	0.366	0.471	FALSE	No_SigChange	5.57	5.66	5.47	0.18	0.595	0.652	FALSE	No_SigChange	5.45	5.42	5.47	-0.06	0.845	0.871	FALSE	No_SigChange	Intergenic	ERVB7_2B-LTR_MM|LTR|ERVK	-1076486	NM_172653	Slc39a10	0.033435	0.530303	ERVB7_2B-LTR_MM	ERVK	LTR	LTR
chr1	48480020	48480280	4.28	4.67	3.73	0.94	0.0296	0.0893	FALSE	No_SigChange	4.64	4.67	4.61	0.06	0.88	0.914	FALSE	No_SigChange	4.37	3.73	4.82	-1.09	0.00892	0.0183	FALSE	No_SigChange	4.75	4.67	4.82	-0.15	0.669	0.714	FALSE	No_SigChange	Intergenic	RMER17B|LTR|ERVK	-1626641	NM_172653	Slc39a10	0.007722	0.55	RMER17B	ERVK	LTR	LTR
chr1	48488760	48488960	4.92	5.31	4.39	0.92	0.0136	0.049	FALSE	No_SigChange	4.54	5.31	2.75	2.56	2.72e-07	8.44e-06	TRUE	SigDecrease	3.67	4.39	2.17	2.22	0.000269	0.000954	TRUE	SigDecrease	4.47	5.31	2.17	3.14	1.69e-08	1.06e-07	TRUE	SigDecrease	Intergenic	Intergenic	-1635351	NM_172653	Slc39a10	0	0.44	Intergenic	Intergenic	Intergenic	Other
chr1	48651420	48651790	5.67	5.95	5.31	0.64	0.0225	0.0724	FALSE	No_SigChange	5.82	5.95	5.67	0.29	0.327	0.431	FALSE	No_SigChange	5.09	5.31	4.82	0.49	0.205	0.262	FALSE	No_SigChange	5.49	5.95	4.82	1.13	0.00144	0.00304	TRUE	SigDecrease	Intergenic	ERVB7_2B-LTR_MM|LTR|ERVK	-1798096	NM_172653	Slc39a10	0.01626	0.478378	ERVB7_2B-LTR_MM	ERVK	LTR	LTR
chr1	48656670	48656840	3.34	3.55	3.09	0.47	0.436	0.619	FALSE	No_SigChange	4.15	3.55	4.57	-1.02	0.03	0.0725	FALSE	No_SigChange	3.42	3.09	3.7	-0.61	0.308	0.372	FALSE	No_SigChange	3.63	3.55	3.7	-0.15	0.794	0.826	FALSE	No_SigChange	Intergenic	ERVB7_2-LTR_MM|LTR|ERVK	-1803246	NM_172653	Slc39a10	0.029586	0.505882	ERVB7_2-LTR_MM	ERVK	LTR	LTR
chr1	49260890	49261110	4.43	5	3.49	1.51	0.05	0.133	FALSE	No_SigChange	5.07	5	5.14	-0.14	0.68	0.756	FALSE	No_SigChange	3.67	3.49	3.83	-0.34	0.581	0.638	FALSE	No_SigChange	4.53	5	3.83	1.17	0.00468	0.00871	TRUE	SigDecrease	Intergenic	Intergenic	-1666523	NM_019790	Tmeff2	0	0.513636	Intergenic	Intergenic	Intergenic	Other
chr1	49934810	49935100	5.95	5.43	6.33	-0.9	0.000463	0.00329	TRUE	SigIncrease	5.47	5.43	5.5	-0.07	0.845	0.888	FALSE	No_SigChange	6.18	6.33	6	0.32	0.229	0.287	FALSE	No_SigChange	5.75	5.43	6	-0.57	0.0715	0.0992	FALSE	No_SigChange	Intergenic	L1Md_F2|LINE|L1	-992568	NM_019790	Tmeff2	0.031142	0.572414	L1Md_F2	L1	LINE	LINE
chr1	49986940	49987430	3.83	2.95	4.37	-1.42	0.00388	0.0183	FALSE	No_SigChange	4.14	2.95	4.78	-1.83	0.000291	0.00232	TRUE	SigIncrease	5.29	4.37	5.85	-1.48	4.79e-06	2.98e-05	TRUE	SigIncrease	5.03	2.95	5.85	-2.9	2.39e-12	3.5e-11	TRUE	SigIncrease	Intergenic	RLTR44C|LTR|ERVK	-940338	NM_019790	Tmeff2	0.018405	0.473469	RLTR44C	ERVK	LTR	LTR
chr1	50026150	50026320	2.49	2.81	2.09	0.72	0.397	0.583	FALSE	No_SigChange	2.91	2.81	3	-0.19	0.776	0.834	FALSE	No_SigChange	3.82	2.08	4.58	-2.5	3.33e-05	0.000159	TRUE	SigIncrease	3.95	2.8	4.58	-1.78	0.000473	0.00112	TRUE	SigIncrease	Intergenic	Lx2|LINE|L1	-901288	NM_019790	Tmeff2	0	0.376471	Lx2	L1	LINE	LINE
chr1	50555160	50555370	4.59	4.89	4.21	0.69	0.0588	0.15	FALSE	No_SigChange	4.73	4.89	4.55	0.34	0.339	0.443	FALSE	No_SigChange	4.39	4.21	4.55	-0.35	0.363	0.428	FALSE	No_SigChange	4.73	4.89	4.55	0.34	0.336	0.393	FALSE	No_SigChange	Intergenic	RMER17B|LTR|ERVK	-372258	NM_019790	Tmeff2	0.004785	0.547619	RMER17B	ERVK	LTR	LTR
chr1	50637910	50638420	6.5	6.48	6.53	-0.05	0.818	0.9	FALSE	No_SigChange	5.7	6.47	3.93	2.54	2.22e-11	3.53e-09	TRUE	SigDecrease	5.92	6.53	4.84	1.68	3.6e-07	3.1e-06	TRUE	SigDecrease	5.88	6.47	4.84	1.63	8.9e-07	3.85e-06	TRUE	SigDecrease	Intergenic	LTR37A|LTR|ERV1	-289358	NM_019790	Tmeff2	0.001965	0.323529	LTR37A	ERV1	LTR	LTR
chr1	50652240	50652620	6.1	6.37	5.75	0.63	0.0301	0.0905	FALSE	No_SigChange	5.94	6.37	5.32	1.05	0.000344	0.00264	TRUE	SigDecrease	5.38	5.75	4.89	0.85	0.035	0.058	FALSE	No_SigChange	5.81	6.37	4.89	1.48	0.000129	0.000348	TRUE	SigDecrease	Intergenic	Intergenic	-275093	NM_019790	Tmeff2	0.002639	0.413158	Intergenic	Intergenic	Intergenic	Other
chr1	50653490	50653770	5.9	6.2	5.52	0.69	0.00806	0.0326	FALSE	No_SigChange	5.48	6.2	3.95	2.25	4.61e-10	4.34e-08	TRUE	SigDecrease	4.77	5.51	3.13	2.39	1.51e-07	1.45e-06	TRUE	SigDecrease	5.36	6.2	3.13	3.07	9.74e-14	1.95e-12	TRUE	SigDecrease	Intergenic	B4|SINE|B4	-273893	NM_019790	Tmeff2	0	0.425	B4	B4	SINE	SINE
chr1	50900280	50900680	5.25	5.07	5.41	-0.34	0.238	0.414	FALSE	No_SigChange	4.99	5.06	4.92	0.15	0.663	0.742	FALSE	No_SigChange	5.78	5.41	6.07	-0.66	0.0166	0.0309	FALSE	No_SigChange	5.65	5.06	6.07	-1.01	0.000416	0.001	TRUE	SigIncrease	Intergenic	RLTR10D2|LTR|ERVK	-27043	NM_019790	Tmeff2	0.02005	0.515	RLTR10D2	ERVK	LTR	LTR
chr1	50926180	50928250	10.12	10.06	10.18	-0.12	0.56	0.723	FALSE	No_SigChange	9.93	10.06	9.78	0.29	0.219	0.317	FALSE	No_SigChange	9.94	10.18	9.65	0.53	0.0366	0.0602	FALSE	No_SigChange	9.87	10.06	9.65	0.41	0.0819	0.112	FALSE	No_SigChange	promoter-TSS	promoter-TSS (NM_019790)	-308	NM_019790	Tmeff2	0.050266	0.589855	promoter-TSS	promoter-TSS	promoter-TSS	Other
chr1	51094740	51094950	5.13	5.16	5.11	0.05	0.859	0.924	FALSE	No_SigChange	4.51	5.16	3.29	1.87	3.07e-06	6.1e-05	TRUE	SigDecrease	4.38	5.11	2.86	2.25	6.89e-07	5.48e-06	TRUE	SigDecrease	4.42	5.16	2.86	2.3	7.46e-07	3.28e-06	TRUE	SigDecrease	intron	MER45B|DNA|hAT-Tip100	167322	NM_019790	Tmeff2	0.004785	0.357143	MER45B	hAT-Tip100	DNA	Other
chr1	51152020	51152370	4.43	4.54	4.3	0.24	0.513	0.685	FALSE	No_SigChange	5.05	4.54	5.43	-0.9	0.00904	0.0308	FALSE	No_SigChange	4.59	4.3	4.83	-0.53	0.19	0.245	FALSE	No_SigChange	4.69	4.54	4.83	-0.3	0.467	0.525	FALSE	No_SigChange	intron	intron (NM_019790, intron 7 of 9)	-136931	NM_138741	Sdpr	0.002865	0.417143	intron	intron	intron	Other
chr1	51208180	51208540	4.29	3.88	4.6	-0.72	0.0672	0.166	FALSE	No_SigChange	3.63	3.88	3.32	0.56	0.271	0.373	FALSE	No_SigChange	5.19	4.6	5.61	-1.01	0.0016	0.00433	TRUE	SigIncrease	4.99	3.88	5.61	-1.73	2.25e-06	8.97e-06	TRUE	SigIncrease	Intergenic	RLTR10B2|LTR|ERVK	-80766	NM_138741	Sdpr	0.02507	0.463889	RLTR10B2	ERVK	LTR	LTR
chr1	51271920	51272110	5.43	5.4	5.46	-0.06	0.84	0.913	FALSE	No_SigChange	5.14	5.4	4.82	0.58	0.0717	0.137	FALSE	No_SigChange	4.87	5.46	3.88	1.58	1.95e-05	9.99e-05	TRUE	SigDecrease	4.83	5.4	3.88	1.52	7.46e-05	0.000213	TRUE	SigDecrease	intron	intron (NR_045151, intron 2 of 4)	-17111	NM_138741	Sdpr	0.015873	0.521053	intron	intron	intron	Other
chr1	51273580	51274180	6.19	6.17	6.21	-0.04	0.888	0.94	FALSE	No_SigChange	6.06	6.17	5.94	0.23	0.463	0.565	FALSE	No_SigChange	6.04	6.21	5.84	0.36	0.218	0.276	FALSE	No_SigChange	6.02	6.17	5.84	0.32	0.332	0.389	FALSE	No_SigChange	intron	intron (NR_045151, intron 2 of 4)	-15246	NM_138741	Sdpr	0.010017	0.433333	intron	intron	intron	Other
chr1	51288920	51289720	6.74	6.89	6.58	0.3	0.136	0.279	FALSE	No_SigChange	7.11	6.89	7.3	-0.41	0.0759	0.142	FALSE	No_SigChange	6.52	6.58	6.45	0.13	0.586	0.643	FALSE	No_SigChange	6.68	6.89	6.45	0.44	0.0808	0.111	FALSE	No_SigChange	5'UTR	5' UTR (NM_138741, exon 1 of 2)	194	NM_138741	Sdpr	0.018773	0.51875	5'UTR	5'UTR	5'UTR	Other
chr1	51333560	51334360	6.92	7.14	6.67	0.46	0.0408	0.114	FALSE	No_SigChange	7.36	7.14	7.56	-0.42	0.0759	0.142	FALSE	No_SigChange	6.87	6.67	7.05	-0.38	0.135	0.183	FALSE	No_SigChange	7.09	7.13	7.05	0.09	0.708	0.749	FALSE	No_SigChange	promoter-TSS	promoter-TSS (NR_045151)	-181	NR_045151	9330175M20Rik	0.02378	0.44	promoter-TSS	promoter-TSS	promoter-TSS	Other
chr1	51411310	51411980	5.71	3.95	6.48	-2.53	3.95e-18	2.39e-15	TRUE	SigIncrease	4.64	3.95	5.11	-1.16	0.00244	0.0118	FALSE	No_SigChange	6.38	6.48	6.27	0.21	0.41	0.475	FALSE	No_SigChange	5.53	3.95	6.27	-2.31	2.52e-12	3.67e-11	TRUE	SigIncrease	Intergenic	Intergenic	66754	NM_028696	Nabp1	0.023916	0.51791	Intergenic	Intergenic	Intergenic	Other
chr1	51433340	51433720	4.48	5	3.64	1.36	0.000514	0.00358	TRUE	SigDecrease	5	5	5.01	-0.01	0.972	0.981	FALSE	No_SigChange	4.04	3.64	4.36	-0.72	0.0968	0.138	FALSE	No_SigChange	4.71	5	4.36	0.64	0.0699	0.0972	FALSE	No_SigChange	Intergenic	L1Md_Gf|LINE|L1	44869	NM_028696	Nabp1	0.05277	0.618421	L1Md_Gf	L1	LINE	LINE
chr1	51458650	51459710	8.13	7.83	8.37	-0.54	0.00468	0.0211	FALSE	No_SigChange	7.98	7.83	8.12	-0.3	0.212	0.31	FALSE	No_SigChange	8.26	8.37	8.14	0.23	0.328	0.393	FALSE	No_SigChange	7.99	7.83	8.14	-0.31	0.185	0.232	FALSE	No_SigChange	Intergenic	LTR41|LTR|ERVL	19219	NM_028696	Nabp1	0.015109	0.490566	LTR41	ERVL	LTR	LTR
chr1	51465480	51465650	4.7	4.95	4.39	0.56	0.169	0.326	FALSE	No_SigChange	4.79	4.95	4.6	0.35	0.378	0.483	FALSE	No_SigChange	4.06	4.39	3.64	0.75	0.1	0.142	FALSE	No_SigChange	4.44	4.95	3.64	1.31	0.0046	0.00859	TRUE	SigDecrease	Intergenic	Intergenic	12834	NM_028696	Nabp1	0.005917	0.441176	Intergenic	Intergenic	Intergenic	Other
chr1	51466410	51466960	5.81	5.47	6.09	-0.63	0.0324	0.0957	FALSE	No_SigChange	5.83	5.47	6.11	-0.65	0.0438	0.0952	FALSE	No_SigChange	6.17	6.09	6.25	-0.16	0.595	0.651	FALSE	No_SigChange	5.91	5.47	6.25	-0.79	0.0164	0.0266	FALSE	No_SigChange	Intergenic	Intergenic	11714	NM_028696	Nabp1	0.003643	0.387273	Intergenic	Intergenic	Intergenic	Other
chr1	51468120	51468500	4.49	4.7	4.25	0.45	0.284	0.468	FALSE	No_SigChange	5.12	4.7	5.45	-0.75	0.0517	0.107	FALSE	No_SigChange	5.03	4.25	5.54	-1.29	0.000394	0.00132	TRUE	SigIncrease	5.18	4.7	5.54	-0.84	0.011	0.0188	FALSE	No_SigChange	Intergenic	Intergenic	10089	NM_028696	Nabp1	0.005277	0.389474	Intergenic	Intergenic	Intergenic	Other
chr1	51477560	51479000	9.55	9.64	9.45	0.18	0.322	0.509	FALSE	No_SigChange	9.5	9.64	9.35	0.29	0.211	0.308	FALSE	No_SigChange	9.37	9.45	9.28	0.17	0.461	0.526	FALSE	No_SigChange	9.47	9.64	9.28	0.36	0.0885	0.12	FALSE	No_SigChange	5'UTR	5' UTR (NM_028696, exon 1 of 6)	119	NM_028696	Nabp1	0.061849	0.5625	5'UTR	5'UTR	5'UTR	Other
chr1	51508580	51509960	7.25	7.37	7.12	0.25	0.313	0.499	FALSE	No_SigChange	7.76	7.37	8.07	-0.71	0.0174	0.049	FALSE	No_SigChange	7.64	7.12	8.03	-0.91	0.000761	0.00231	TRUE	SigIncrease	7.73	7.37	8.03	-0.66	0.00829	0.0145	FALSE	No_SigChange	Intergenic	Intergenic	-30871	NM_028696	Nabp1	0.012328	0.439855	Intergenic	Intergenic	Intergenic	Other
chr1	51536030	51536740	7.26	6.87	7.57	-0.7	0.0113	0.0423	FALSE	No_SigChange	6.32	6.87	5.43	1.43	0.000246	0.00203	TRUE	SigDecrease	6.93	7.57	5.77	1.79	1.03e-08	1.37e-07	TRUE	SigDecrease	6.42	6.87	5.77	1.09	0.00366	0.00699	TRUE	SigDecrease	Intergenic	PB1D7|SINE|Alu	-57986	NM_028696	Nabp1	0.004231	0.428169	PB1D7	Alu	SINE	SINE
chr1	51551750	51552030	5.25	5.36	5.14	0.22	0.454	0.635	FALSE	No_SigChange	5.05	5.36	4.66	0.7	0.0581	0.117	FALSE	No_SigChange	4.82	5.14	4.43	0.71	0.0272	0.0468	FALSE	No_SigChange	4.96	5.36	4.43	0.93	0.0057	0.0104	FALSE	No_SigChange	Intergenic	RLTR20A3_MM|LTR|ERVK	-73491	NM_028696	Nabp1	0.007168	0.528571	RLTR20A3_MM	ERVK	LTR	LTR
chr1	51572320	51573660	8.08	8.03	8.13	-0.11	0.627	0.773	FALSE	No_SigChange	8.2	8.02	8.35	-0.33	0.257	0.358	FALSE	No_SigChange	8.09	8.13	8.05	0.08	0.78	0.817	FALSE	No_SigChange	8.04	8.02	8.05	-0.03	0.919	0.933	FALSE	No_SigChange	Intergenic	ORR1F|LTR|ERVL-MaLR	-94591	NM_028696	Nabp1	0.010456	0.446269	ORR1F	ERVL-MaLR	LTR	LTR
chr1	51596920	51597590	6.98	7.1	6.84	0.26	0.236	0.412	FALSE	No_SigChange	7.18	7.1	7.26	-0.16	0.535	0.631	FALSE	No_SigChange	7	6.84	7.14	-0.3	0.234	0.293	FALSE	No_SigChange	7.12	7.1	7.14	-0.04	0.878	0.899	FALSE	No_SigChange	Intergenic	Intergenic	-118856	NM_028696	Nabp1	0.016442	0.437313	Intergenic	Intergenic	Intergenic	Other
chr1	51600460	51600670	5.06	4.95	5.16	-0.21	0.569	0.73	FALSE	No_SigChange	4.75	4.95	4.51	0.45	0.291	0.395	FALSE	No_SigChange	5.03	5.16	4.89	0.26	0.396	0.461	FALSE	No_SigChange	4.92	4.95	4.89	0.06	0.881	0.901	FALSE	No_SigChange	Intergenic	Intergenic	-122166	NM_028696	Nabp1	0.014354	0.385714	Intergenic	Intergenic	Intergenic	Other
chr1	51615470	51615910	5.67	5.61	5.72	-0.11	0.648	0.789	FALSE	No_SigChange	5.95	5.61	6.23	-0.63	0.0228	0.0597	FALSE	No_SigChange	5.91	5.72	6.09	-0.37	0.168	0.221	FALSE	No_SigChange	5.87	5.6	6.09	-0.48	0.082	0.112	FALSE	No_SigChange	Intergenic	Intergenic	-137291	NM_028696	Nabp1	0.013667	0.427273	Intergenic	Intergenic	Intergenic	Other
chr1	51624650	51625130	6.12	6.18	6.05	0.14	0.647	0.788	FALSE	No_SigChange	6.02	6.18	5.85	0.34	0.298	0.401	FALSE	No_SigChange	6.14	6.05	6.23	-0.18	0.489	0.552	FALSE	No_SigChange	6.21	6.18	6.23	-0.05	0.878	0.899	FALSE	No_SigChange	Intergenic	Intergenic	-146491	NM_028696	Nabp1	0.010438	0.485417	Intergenic	Intergenic	Intergenic	Other
chr1	51643680	51643880	4.71	4.89	4.49	0.4	0.332	0.519	FALSE	No_SigChange	5.21	4.89	5.48	-0.58	0.193	0.287	FALSE	No_SigChange	3.87	4.49	2.75	1.74	0.000449	0.00147	TRUE	SigDecrease	4.19	4.89	2.75	2.14	7.89e-05	0.000224	TRUE	SigDecrease	Intergenic	Intergenic	-165381	NM_028696	Nabp1	0.01005	0.48	Intergenic	Intergenic	Intergenic	Other
chr1	51644240	51644660	5.28	5.19	5.37	-0.18	0.558	0.722	FALSE	No_SigChange	5.56	5.19	5.85	-0.66	0.0339	0.0791	FALSE	No_SigChange	5.44	5.36	5.51	-0.14	0.645	0.697	FALSE	No_SigChange	5.36	5.19	5.51	-0.32	0.331	0.387	FALSE	No_SigChange	Intergenic	Intergenic	-166051	NM_028696	Nabp1	0.009547	0.445238	Intergenic	Intergenic	Intergenic	Other
chr1	51687940	51688300	5.99	5.86	6.11	-0.25	0.424	0.608	FALSE	No_SigChange	5.64	5.86	5.37	0.48	0.137	0.221	FALSE	No_SigChange	5.59	6.11	4.77	1.34	2.4e-05	0.00012	TRUE	SigDecrease	5.41	5.86	4.77	1.09	0.00137	0.00291	TRUE	SigDecrease	Intergenic	RMER17C2|LTR|ERVK	-209721	NM_028696	Nabp1	0.011142	0.477778	RMER17C2	ERVK	LTR	LTR
chr1	51746770	51747210	6	6.05	5.95	0.1	0.695	0.821	FALSE	No_SigChange	5.81	6.05	5.52	0.52	0.0811	0.15	FALSE	No_SigChange	5.78	5.95	5.59	0.35	0.244	0.304	FALSE	No_SigChange	5.84	6.05	5.59	0.46	0.164	0.208	FALSE	No_SigChange	Intergenic	Intergenic	168984	NM_001161817	Myo1b	0.031891	0.488636	Intergenic	Intergenic	Intergenic	Other
chr1	51747550	51747900	6.35	6.74	5.79	0.95	0.000104	0.000961	TRUE	SigDecrease	6.42	6.74	6	0.74	0.00242	0.0117	FALSE	No_SigChange	5.81	5.79	5.82	-0.03	0.925	0.939	FALSE	No_SigChange	6.35	6.74	5.82	0.92	0.000161	0.000426	TRUE	SigDecrease	Intergenic	Intergenic	168249	NM_001161817	Myo1b	0.028653	0.488571	Intergenic	Intergenic	Intergenic	Other
chr1	51758650	51758990	5.18	4.77	5.5	-0.73	0.0316	0.0938	FALSE	No_SigChange	4.32	4.77	3.67	1.09	0.0348	0.0808	FALSE	No_SigChange	4.72	5.5	2.91	2.59	1.07e-10	2.44e-09	TRUE	SigDecrease	4.12	4.77	2.91	1.86	0.000239	0.000609	TRUE	SigDecrease	intron	intron (NM_001290982, intron 25 of 28)	157154	NM_001161817	Myo1b	0.014749	0.482353	intron	intron	intron	Other
chr1	51795910	51796110	4.35	3.39	4.92	-1.53	0.00153	0.00866	TRUE	SigIncrease	3.58	3.39	3.75	-0.36	0.563	0.656	FALSE	No_SigChange	4.51	4.92	3.95	0.96	0.0127	0.0246	FALSE	No_SigChange	3.7	3.39	3.95	-0.56	0.354	0.411	FALSE	No_SigChange	intron	intron (NM_001290982, intron 11 of 28)	119964	NM_001161817	Myo1b	0.015075	0.485	intron	intron	intron	Other
chr1	51802810	51802980	3.95	2.17	4.73	-2.56	0.00895	0.0353	FALSE	No_SigChange	2.95	2.17	3.46	-1.29	0.107	0.184	FALSE	No_SigChange	4.47	4.73	4.15	0.58	0.157	0.208	FALSE	No_SigChange	3.47	2.17	4.15	-1.98	0.00556	0.0102	FALSE	No_SigChange	intron	intron (NM_001290982, intron 7 of 28)	113079	NM_001161817	Myo1b	0.011834	0.505882	intron	intron	intron	Other
chr1	51871380	51871530	4.9	4.88	4.92	-0.04	0.924	0.96	FALSE	No_SigChange	4.36	4.88	3.52	1.36	0.00223	0.011	FALSE	No_SigChange	4.2	4.92	2.7	2.22	1.38e-05	7.42e-05	TRUE	SigDecrease	4.17	4.88	2.7	2.18	2.75e-05	8.66e-05	TRUE	SigDecrease	intron	C-rich|Low_complexity|Low_complexity	44519	NM_001161817	Myo1b	0	0.546667	C-rich	Low_complexity	Low_complexity	Other
chr1	51879280	51879760	6.77	6.77	6.77	0	0.988	0.994	FALSE	No_SigChange	6.43	6.77	5.97	0.81	0.00343	0.0152	FALSE	No_SigChange	6.31	6.77	5.64	1.13	1.87e-06	1.31e-05	TRUE	SigDecrease	6.32	6.77	5.64	1.13	1.07e-05	3.68e-05	TRUE	SigDecrease	intron	intron (NM_001290982, intron 2 of 28)	36454	NM_001161817	Myo1b	0.018789	0.552083	intron	intron	intron	Other
chr1	51914810	51916550	9.39	9.33	9.44	-0.11	0.61	0.761	FALSE	No_SigChange	9.12	9.33	8.89	0.44	0.0971	0.171	FALSE	No_SigChange	9.22	9.44	8.97	0.47	0.068	0.102	FALSE	No_SigChange	9.16	9.33	8.97	0.36	0.144	0.186	FALSE	No_SigChange	intron	CpG	294	NM_001161817	Myo1b	0.06958	0.612069	CpG	CpG	CpG	Other
chr1	51922720	51923170	5.85	5.81	5.89	-0.07	0.772	0.872	FALSE	No_SigChange	5.88	5.81	5.94	-0.13	0.655	0.735	FALSE	No_SigChange	5.76	5.89	5.63	0.26	0.365	0.43	FALSE	No_SigChange	5.72	5.81	5.63	0.18	0.543	0.597	FALSE	No_SigChange	Intergenic	Intergenic	-6971	NM_010863	Myo1b	0.026726	0.446667	Intergenic	Intergenic	Intergenic	Other
chr1	51931240	51931910	7.02	6.9	7.12	-0.22	0.297	0.481	FALSE	No_SigChange	6.77	6.9	6.61	0.29	0.332	0.436	FALSE	No_SigChange	6.74	7.12	6.22	0.9	0.000104	0.000423	TRUE	SigDecrease	6.6	6.9	6.22	0.68	0.00534	0.00982	TRUE	SigDecrease	Intergenic	Intergenic	-15601	NM_010863	Myo1b	0.010463	0.462687	Intergenic	Intergenic	Intergenic	Other
chr1	51944890	51945090	4.9	4.7	5.08	-0.38	0.264	0.446	FALSE	No_SigChange	4.87	4.7	5.02	-0.32	0.362	0.467	FALSE	No_SigChange	4.96	5.07	4.83	0.24	0.492	0.555	FALSE	No_SigChange	4.77	4.7	4.83	-0.13	0.722	0.761	FALSE	No_SigChange	Intergenic	Intergenic	-29016	NM_010863	Myo1b	0.01005	0.46	Intergenic	Intergenic	Intergenic	Other
chr1	51998570	51998780	4.55	4.61	4.49	0.12	0.759	0.863	FALSE	No_SigChange	5.07	4.61	5.42	-0.8	0.0207	0.0556	FALSE	No_SigChange	4.88	4.49	5.19	-0.7	0.0535	0.0831	FALSE	No_SigChange	4.93	4.61	5.19	-0.58	0.0893	0.121	FALSE	No_SigChange	Intergenic	Intergenic	-9569	NM_011487	Stat4	0.009569	0.452381	Intergenic	Intergenic	Intergenic	Other
chr1	52003890	52004520	6.15	5.99	6.29	-0.3	0.212	0.384	FALSE	No_SigChange	6.26	5.99	6.49	-0.5	0.0589	0.118	FALSE	No_SigChange	6.48	6.29	6.66	-0.37	0.136	0.184	FALSE	No_SigChange	6.36	5.99	6.66	-0.67	0.0105	0.018	FALSE	No_SigChange	Intergenic	MIRb|SINE|MIR	-4039	NM_011487	Stat4	0.017488	0.436508	MIRb	MIR	SINE	SINE
chr1	52008310	52009510	7.85	7.89	7.81	0.08	0.692	0.819	FALSE	No_SigChange	7.8	7.89	7.7	0.18	0.46	0.563	FALSE	No_SigChange	7.71	7.81	7.61	0.2	0.373	0.439	FALSE	No_SigChange	7.75	7.88	7.61	0.28	0.242	0.294	FALSE	No_SigChange	intron	intron (NM_011487, intron 1 of 23)	666	NM_011487	Stat4	0.022519	0.500833	intron	intron	intron	Other
chr1	52046480	52047330	7.02	6.84	7.18	-0.35	0.112	0.242	FALSE	No_SigChange	6.77	6.84	6.7	0.14	0.605	0.692	FALSE	No_SigChange	6.97	7.18	6.72	0.46	0.0393	0.0639	FALSE	No_SigChange	6.78	6.84	6.72	0.12	0.618	0.668	FALSE	No_SigChange	intron	G-rich|Low_complexity|Low_complexity	38661	NM_011487	Stat4	0.011779	0.6	G-rich	Low_complexity	Low_complexity	Other
chr1	52079880	52080440	6.76	6.58	6.91	-0.33	0.142	0.288	FALSE	No_SigChange	6.16	6.58	5.57	1.01	0.00041	0.00303	TRUE	SigDecrease	6.14	6.91	4.36	2.55	7.41e-18	1.08e-15	TRUE	SigDecrease	5.86	6.58	4.36	2.22	4.3e-11	4.77e-10	TRUE	SigDecrease	intron	intron (NM_011487, intron 10 of 23)	-39278	NM_001205314	Stat1	0.012522	0.441071	intron	intron	intron	Other
chr1	52100510	52100890	5.42	5.06	5.71	-0.66	0.0257	0.08	FALSE	No_SigChange	5.09	5.05	5.13	-0.08	0.82	0.869	FALSE	No_SigChange	5.36	5.71	4.88	0.83	0.00623	0.0135	FALSE	No_SigChange	4.97	5.05	4.88	0.17	0.607	0.657	FALSE	No_SigChange	intron	intron (NM_011487, intron 17 of 23)	-18738	NM_001205314	Stat1	0.013193	0.444737	intron	intron	intron	Other
chr1	52113360	52114150	8.7	8.81	8.58	0.22	0.173	0.332	FALSE	No_SigChange	8.69	8.81	8.57	0.24	0.308	0.412	FALSE	No_SigChange	8.62	8.58	8.65	-0.06	0.754	0.795	FALSE	No_SigChange	8.73	8.8	8.65	0.16	0.419	0.477	FALSE	No_SigChange	Intergenic	CpG	-5683	NM_001205314	Stat1	0.048162	0.544304	CpG	CpG	CpG	Other
chr1	52119080	52120260	9.21	9.1	9.31	-0.21	0.271	0.453	FALSE	No_SigChange	8.86	9.1	8.58	0.52	0.0366	0.0836	FALSE	No_SigChange	8.86	9.31	8.19	1.12	5.75e-07	4.68e-06	TRUE	SigDecrease	8.71	9.1	8.19	0.91	2.83e-05	8.89e-05	TRUE	SigDecrease	promoter-TSS	promoter-TSS (NM_001205313)	48	NM_001205313	Stat1	0.052587	0.54661	promoter-TSS	promoter-TSS	promoter-TSS	Other
chr1	52146560	52146970	6.51	6.37	6.64	-0.27	0.27	0.452	FALSE	No_SigChange	6.2	6.36	6.01	0.35	0.193	0.288	FALSE	No_SigChange	6.38	6.64	6.07	0.57	0.0218	0.0388	FALSE	No_SigChange	6.22	6.36	6.07	0.29	0.268	0.322	FALSE	No_SigChange	intron	intron (NM_009283, intron 15 of 24)	27143	NM_001205313	Stat1	0.01467	0.495122	intron	intron	intron	Other
chr1	52169970	52170810	7.27	7.24	7.29	-0.05	0.838	0.912	FALSE	No_SigChange	7.05	7.24	6.83	0.41	0.141	0.227	FALSE	No_SigChange	7.02	7.29	6.69	0.6	0.0225	0.0398	FALSE	No_SigChange	6.99	7.24	6.69	0.55	0.0355	0.0531	FALSE	No_SigChange	intron	B3A|SINE|B2	50768	NM_001205313	Stat1	0.009535	0.509524	B3A	B2	SINE	SINE
chr1	52216920	52217130	4.99	4.63	5.28	-0.65	0.0571	0.147	FALSE	No_SigChange	4.43	4.63	4.19	0.44	0.314	0.418	FALSE	No_SigChange	5.04	5.27	4.75	0.52	0.115	0.16	FALSE	No_SigChange	4.69	4.63	4.75	-0.13	0.733	0.771	FALSE	No_SigChange	intron	B3|SINE|B2	16207	NM_001081081	Gls	0	0.4	B3	B2	SINE	SINE
chr1	52232020	52233920	10.35	10.35	10.36	-0.01	0.975	0.987	FALSE	No_SigChange	10.14	10.35	9.89	0.46	0.0532	0.11	FALSE	No_SigChange	10.12	10.35	9.84	0.51	0.0418	0.0675	FALSE	No_SigChange	10.12	10.35	9.84	0.51	0.028	0.043	FALSE	No_SigChange	exon	exon (NM_001113383, exon 1 of 15)	262	NM_001081081	Gls	0.090574	0.66	exon	exon	exon	Other
chr1	52302580	52302960	6	6.01	5.98	0.03	0.913	0.955	FALSE	No_SigChange	5.96	6.01	5.91	0.1	0.72	0.788	FALSE	No_SigChange	5.88	5.98	5.78	0.2	0.503	0.565	FALSE	No_SigChange	5.9	6.01	5.78	0.23	0.425	0.483	FALSE	No_SigChange	Intergenic	Lx8b|LINE|L1	-69538	NM_001113383	Gls	0.015831	0.507895	Lx8b	L1	LINE	LINE
chr1	52307120	52307350	4.37	3.39	4.94	-1.55	0.00108	0.0065	TRUE	SigIncrease	3.44	3.39	3.49	-0.1	0.883	0.917	FALSE	No_SigChange	5.13	4.94	5.3	-0.36	0.24	0.3	FALSE	No_SigChange	4.64	3.39	5.3	-1.91	2.88e-05	9.03e-05	TRUE	SigIncrease	Intergenic	Intergenic	-74003	NM_001113383	Gls	0.0131	0.46087	Intergenic	Intergenic	Intergenic	Other
chr1	52312290	52312770	4.45	3.95	4.82	-0.87	0.0535	0.14	FALSE	No_SigChange	3.67	3.95	3.32	0.63	0.302	0.406	FALSE	No_SigChange	5.98	4.82	6.61	-1.8	1.97e-07	1.83e-06	TRUE	SigIncrease	5.83	3.95	6.61	-2.66	2.95e-15	8.29e-14	TRUE	SigIncrease	Intergenic	Intergenic	-79298	NM_001113383	Gls	0.004175	0.404167	Intergenic	Intergenic	Intergenic	Other
chr1	52321040	52321490	3.79	3.09	4.27	-1.18	0.0296	0.0891	FALSE	No_SigChange	3.17	3.09	3.25	-0.16	0.825	0.872	FALSE	No_SigChange	5.16	4.26	5.71	-1.44	1.02e-05	5.76e-05	TRUE	SigIncrease	4.92	3.09	5.71	-2.62	3.41e-09	2.48e-08	TRUE	SigIncrease	Intergenic	MTD|LTR|ERVL-MaLR	-88033	NM_001113383	Gls	0.011136	0.502222	MTD	ERVL-MaLR	LTR	LTR
chr1	52326070	52326470	5.64	5.22	5.97	-0.75	0.0196	0.0652	FALSE	No_SigChange	4.47	5.22	2.86	2.36	2.98e-06	5.94e-05	TRUE	SigDecrease	5.32	5.96	4.15	1.81	2.57e-08	3.07e-07	TRUE	SigDecrease	4.78	5.22	4.15	1.07	0.0108	0.0184	FALSE	No_SigChange	Intergenic	RMER16B|LTR|ERVK	-93038	NM_001113383	Gls	0.007519	0.4375	RMER16B	ERVK	LTR	LTR
chr1	52354100	52354480	5.37	4.66	5.84	-1.18	0.000179	0.0015	TRUE	SigIncrease	4.34	4.66	3.93	0.73	0.0987	0.173	FALSE	No_SigChange	5.76	5.84	5.69	0.15	0.595	0.652	FALSE	No_SigChange	5.26	4.66	5.69	-1.03	0.00101	0.00222	TRUE	SigIncrease	Intergenic	Intergenic	-121058	NM_001113383	Gls	0.010554	0.460526	Intergenic	Intergenic	Intergenic	Other
chr1	52393000	52393170	3.98	2.7	4.64	-1.94	0.0503	0.134	FALSE	No_SigChange	3.54	2.7	4.07	-1.37	0.0568	0.115	FALSE	No_SigChange	4.55	4.64	4.46	0.18	0.651	0.702	FALSE	No_SigChange	3.83	2.7	4.46	-1.76	0.00873	0.0152	FALSE	No_SigChange	Intergenic	Intergenic	107363	NM_008667	Nab1	0.011834	0.4	Intergenic	Intergenic	Intergenic	Other
chr1	52431730	52432350	6.95	6.45	7.31	-0.87	0.00055	0.00378	TRUE	SigIncrease	6.76	6.45	7.02	-0.58	0.0317	0.0756	FALSE	No_SigChange	7.31	7.31	7.3	0.01	0.968	0.975	FALSE	No_SigChange	6.94	6.44	7.3	-0.86	0.000253	0.000642	TRUE	SigIncrease	Intergenic	RLTR17|LTR|ERVK	68408	NM_008667	Nab1	0.017771	0.48871	RLTR17	ERVK	LTR	LTR
chr1	52456650	52457110	5.84	4.97	6.38	-1.41	1.68e-06	3.04e-05	TRUE	SigIncrease	4.55	4.96	3.98	0.99	0.0302	0.0729	FALSE	No_SigChange	5.93	6.38	5.27	1.11	1.31e-05	7.1e-05	TRUE	SigDecrease	5.12	4.96	5.27	-0.3	0.411	0.469	FALSE	No_SigChange	3'UTR	3' UTR (NM_008667, exon 8 of 8)	43568	NM_008667	Nab1	0.013072	0.465217	3'UTR	3'UTR	3'UTR	Other
chr1	52489750	52490180	6.22	5.81	6.54	-0.73	0.00269	0.0136	FALSE	No_SigChange	5.63	5.81	5.43	0.38	0.227	0.326	FALSE	No_SigChange	6.41	6.54	6.27	0.27	0.281	0.344	FALSE	No_SigChange	6.06	5.8	6.27	-0.47	0.11	0.146	FALSE	No_SigChange	exon	exon (NM_008667, exon 2 of 8)	10483	NM_008667	Nab1	0.016317	0.504651	exon	exon	exon	Other
chr1	52499700	52500960	8.87	8.79	8.95	-0.16	0.412	0.597	FALSE	No_SigChange	8.63	8.79	8.45	0.34	0.172	0.264	FALSE	No_SigChange	8.81	8.95	8.65	0.29	0.221	0.279	FALSE	No_SigChange	8.72	8.79	8.65	0.14	0.566	0.619	FALSE	No_SigChange	5'UTR	5' UTR (NM_008667, exon 1 of 8)	118	NM_008667	Nab1	0.115171	0.715079	5'UTR	5'UTR	5'UTR	Other
chr1	52527640	52527940	5.32	5.48	5.14	0.34	0.313	0.499	FALSE	No_SigChange	4.63	5.48	2.25	3.23	0.00029	0.00231	TRUE	SigDecrease	4.52	5.14	3.43	1.71	0.000319	0.0011	TRUE	SigDecrease	4.79	5.48	3.43	2.06	1.3e-05	4.4e-05	TRUE	SigDecrease	Intergenic	L1_Rod|LINE|L1	-27342	NM_008667	Nab1	0.006689	0.426667	L1_Rod	L1	LINE	LINE
chr1	52530050	52530240	6.07	5.92	6.2	-0.28	0.319	0.505	FALSE	No_SigChange	5.86	5.92	5.79	0.13	0.64	0.722	FALSE	No_SigChange	6.03	6.2	5.84	0.36	0.231	0.29	FALSE	No_SigChange	5.88	5.92	5.84	0.08	0.745	0.783	FALSE	No_SigChange	Intergenic	ORR1D1|LTR|ERVL-MaLR	-29697	NM_008667	Nab1	0	0.552632	ORR1D1	ERVL-MaLR	LTR	LTR
chr1	52597930	52598470	5.87	6.2	5.43	0.77	0.0132	0.0479	FALSE	No_SigChange	6.28	6.2	6.36	-0.16	0.559	0.652	FALSE	No_SigChange	5.78	5.43	6.07	-0.63	0.043	0.0691	FALSE	No_SigChange	6.13	6.2	6.07	0.13	0.646	0.693	FALSE	No_SigChange	Intergenic	Intergenic	-32505	NR_024590	Tmem194b	0.024119	0.475926	Intergenic	Intergenic	Intergenic	Other
chr1	52630340	52631820	9.03	9.06	9	0.07	0.729	0.844	FALSE	No_SigChange	8.95	9.06	8.84	0.23	0.333	0.438	FALSE	No_SigChange	8.74	8.99	8.43	0.57	0.0252	0.0438	FALSE	No_SigChange	8.78	9.06	8.43	0.64	0.00478	0.00888	TRUE	SigDecrease	intron	intron (NR_024590, intron 1 of 8)	375	NM_001142647	Tmem194b	0.037187	0.504054	intron	intron	intron	Other
chr1	52687060	52687290	5.25	4.63	5.68	-1.05	0.000436	0.00312	TRUE	SigIncrease	4.53	4.63	4.43	0.2	0.665	0.743	FALSE	No_SigChange	5.53	5.68	5.37	0.31	0.297	0.361	FALSE	No_SigChange	5.04	4.63	5.37	-0.74	0.0425	0.0623	FALSE	No_SigChange	intron	B4A|SINE|B4	40143	NM_133829	Mfsd6	0.008734	0.43913	B4A	B4	SINE	SINE
chr1	52726060	52727660	9	8.93	9.06	-0.13	0.527	0.697	FALSE	No_SigChange	8.74	8.93	8.51	0.42	0.0899	0.161	FALSE	No_SigChange	8.69	9.06	8.19	0.87	0.0023	0.00588	TRUE	SigDecrease	8.61	8.93	8.19	0.75	0.00784	0.0138	FALSE	No_SigChange	intron	CpG	458	NM_133829	Mfsd6	0.075047	0.62625	CpG	CpG	CpG	Other
chr1	52748450	52748630	4.71	4.82	4.58	0.24	0.518	0.689	FALSE	No_SigChange	4.66	4.82	4.49	0.33	0.398	0.503	FALSE	No_SigChange	4.89	4.58	5.14	-0.56	0.111	0.155	FALSE	No_SigChange	4.99	4.82	5.14	-0.32	0.335	0.392	FALSE	No_SigChange	Intergenic	Intergenic	-21222	NM_178081	Mfsd6	0.005587	0.416667	Intergenic	Intergenic	Intergenic	Other
chr1	52816880	52818010	8.59	8.68	8.5	0.18	0.372	0.56	FALSE	No_SigChange	8.47	8.68	8.24	0.44	0.0775	0.145	FALSE	No_SigChange	7.94	8.5	7.02	1.48	2.57e-09	4.05e-08	TRUE	SigDecrease	8.08	8.68	7.02	1.65	4.94e-12	6.76e-11	TRUE	SigDecrease	5'UTR	5' UTR (NM_008384, exon 1 of 6)	243	NM_008384	Inpp1	0.057573	0.59292	5'UTR	5'UTR	5'UTR	Other
chr1	52823150	52823300	4.81	4.98	4.63	0.35	0.342	0.53	FALSE	No_SigChange	4.62	4.98	4.15	0.83	0.0439	0.0954	FALSE	No_SigChange	4.46	4.63	4.27	0.36	0.34	0.405	FALSE	No_SigChange	4.66	4.97	4.27	0.71	0.0823	0.113	FALSE	No_SigChange	Intergenic	ORR1B1-int|LTR|ERVL-MaLR	-5537	NM_008384	Inpp1	0	0.42	ORR1B1-int	ERVL-MaLR	LTR	LTR
chr1	52840860	52841160	3.74	3.93	3.52	0.41	0.434	0.617	FALSE	No_SigChange	3.93	3.93	3.93	0	0.998	0.999	FALSE	No_SigChange	4.63	3.52	5.25	-1.73	5.73e-05	0.000253	TRUE	SigIncrease	4.73	3.93	5.25	-1.32	0.000433	0.00104	TRUE	SigIncrease	Intergenic	RMER6D|LTR|ERVK	-4036	NM_146108	Hibch	0.003344	0.41	RMER6D	ERVK	LTR	LTR
chr1	52844420	52845510	9.19	9.31	9.05	0.27	0.162	0.316	FALSE	No_SigChange	9.09	9.31	8.84	0.47	0.0583	0.117	FALSE	No_SigChange	8.9	9.04	8.74	0.3	0.19	0.245	FALSE	No_SigChange	9.05	9.31	8.74	0.57	0.0042	0.00791	FALSE	No_SigChange	promoter-TSS	promoter-TSS (NM_146108)	-81	NM_146108	Hibch	0.040404	0.533945	promoter-TSS	promoter-TSS	promoter-TSS	Other
chr1	52864400	52864600	4.45	4.98	3.61	1.36	0.000478	0.00337	TRUE	SigDecrease	4.48	4.98	3.73	1.25	0.00166	0.00881	TRUE	SigDecrease	3.49	3.61	3.36	0.26	0.631	0.685	FALSE	No_SigChange	4.38	4.97	3.36	1.62	0.000129	0.000349	TRUE	SigDecrease	intron	MER2|DNA|TcMar-Tigger	19454	NM_146108	Hibch	0	0.39	MER2	TcMar-Tigger	DNA	Other
chr1	52952420	52954020	9.84	9.95	9.72	0.22	0.218	0.39	FALSE	No_SigChange	9.62	9.94	9.21	0.74	0.00345	0.0153	FALSE	No_SigChange	9.41	9.72	9.02	0.7	0.00842	0.0175	FALSE	No_SigChange	9.55	9.94	9.02	0.93	0.000147	0.000393	TRUE	SigDecrease	promoter-TSS	promoter-TSS (NM_144953)	-380	NM_144953	1700019D03Rik	0.036273	0.560625	promoter-TSS	promoter-TSS	promoter-TSS	Other
chr1	52954990	52955410	6.24	6.3	6.18	0.12	0.654	0.793	FALSE	No_SigChange	6.21	6.3	6.1	0.2	0.491	0.591	FALSE	No_SigChange	6.02	6.18	5.85	0.33	0.309	0.373	FALSE	No_SigChange	6.09	6.3	5.85	0.45	0.129	0.168	FALSE	No_SigChange	Intergenic	Intergenic	-2360	NM_144953	1700019D03Rik	0.011933	0.514286	Intergenic	Intergenic	Intergenic	Other
chr1	52964480	52965010	6.57	6.29	6.8	-0.51	0.0359	0.103	FALSE	No_SigChange	6.26	6.29	6.22	0.06	0.829	0.875	FALSE	No_SigChange	6.49	6.8	6.09	0.7	0.0103	0.0206	FALSE	No_SigChange	6.19	6.29	6.09	0.2	0.514	0.57	FALSE	No_SigChange	Intergenic	Intergenic	-11905	NM_144953	1700019D03Rik	0.026465	0.539623	Intergenic	Intergenic	Intergenic	Other
chr1	53053260	53053490	5.21	5.19	5.24	-0.05	0.866	0.928	FALSE	No_SigChange	5.14	5.19	5.1	0.09	0.778	0.835	FALSE	No_SigChange	4.92	5.24	4.51	0.73	0.0509	0.0797	FALSE	No_SigChange	4.89	5.19	4.51	0.68	0.0798	0.109	FALSE	No_SigChange	Intergenic	Lx3B|LINE|L1	-8288	NM_010834	Mstn	0.008734	0.417391	Lx3B	L1	LINE	LINE
chr1	53187210	53187920	6.55	6.79	6.27	0.52	0.0295	0.089	FALSE	No_SigChange	6.82	6.79	6.85	-0.06	0.81	0.86	FALSE	No_SigChange	6.76	6.26	7.12	-0.86	0.000699	0.00214	TRUE	SigIncrease	6.96	6.79	7.12	-0.33	0.171	0.216	FALSE	No_SigChange	promoter-TSS	promoter-TSS (NM_027070)	52	NM_027070	1700019A02Rik	0.019746	0.490141	promoter-TSS	promoter-TSS	promoter-TSS	Other
chr1	53191230	53191730	6.17	5.64	6.55	-0.91	0.000125	0.00112	TRUE	SigIncrease	5.19	5.64	4.54	1.1	0.0024	0.0117	FALSE	No_SigChange	5.97	6.55	4.99	1.56	2.54e-08	3.04e-07	TRUE	SigDecrease	5.35	5.64	4.99	0.65	0.0524	0.0752	FALSE	No_SigChange	intron	intron (NM_153556, intron 12 of 12)	-3863	NM_027070	1700019A02Rik	0.006012	0.428	intron	intron	intron	Other
chr1	53210030	53210520	7.03	6.99	7.07	-0.07	0.736	0.849	FALSE	No_SigChange	6.16	6.99	4	2.99	2.01e-15	1.48e-12	TRUE	SigDecrease	6.11	7.06	2.17	4.89	3.44e-13	1.54e-11	TRUE	SigDecrease	6.04	6.99	2.17	4.82	1.09e-27	4.45e-25	TRUE	SigDecrease	intron	intron (NM_153556, intron 6 of 12)	-22658	NM_027070	1700019A02Rik	0	0.408163	intron	intron	intron	Other
chr1	53296690	53297550	9.33	9.32	9.34	-0.03	0.895	0.944	FALSE	No_SigChange	9.12	9.31	8.88	0.43	0.0771	0.144	FALSE	No_SigChange	9.11	9.34	8.84	0.5	0.0274	0.0471	FALSE	No_SigChange	9.09	9.31	8.84	0.48	0.0248	0.0386	FALSE	No_SigChange	promoter-TSS	promoter-TSS (NM_145517)	25	NM_145517	Ormdl1	0.08149	0.612791	promoter-TSS	promoter-TSS	promoter-TSS	Other
chr1	53313240	53314020	7.89	7.84	7.94	-0.1	0.614	0.764	FALSE	No_SigChange	7.69	7.83	7.52	0.31	0.201	0.297	FALSE	No_SigChange	7.74	7.94	7.51	0.43	0.0864	0.125	FALSE	No_SigChange	7.68	7.83	7.51	0.33	0.158	0.202	FALSE	No_SigChange	promoter-TSS	promoter-TSS (NR_104360)	-33	NM_028091	Osgepl1	0.033376	0.487179	promoter-TSS	promoter-TSS	promoter-TSS	Other
chr1	53352350	53353030	8.63	8.52	8.74	-0.22	0.285	0.469	FALSE	No_SigChange	8.37	8.52	8.21	0.31	0.211	0.308	FALSE	No_SigChange	8.52	8.73	8.26	0.47	0.0597	0.0913	FALSE	No_SigChange	8.4	8.52	8.26	0.25	0.288	0.343	FALSE	No_SigChange	promoter-TSS	promoter-TSS (NM_133728)	9	NM_133728	Asnsd1	0.063328	0.591176	promoter-TSS	promoter-TSS	promoter-TSS	Other
chr1	53377430	53377730	5.75	6.06	5.36	0.7	0.0227	0.0728	FALSE	No_SigChange	5.39	6.06	4.11	1.95	0.00772	0.0275	FALSE	No_SigChange	4.58	5.36	2.75	2.6	3.82e-09	5.75e-08	TRUE	SigDecrease	5.2	6.06	2.75	3.3	1.07e-12	1.69e-11	TRUE	SigDecrease	Intergenic	MMERVK9E_I-int|LTR|ERVK	-24881	NM_133728	Asnsd1	0.003344	0.42	MMERVK9E_I-int	ERVK	LTR	LTR
chr1	53393840	53394390	5.94	5.69	6.15	-0.47	0.062	0.156	FALSE	No_SigChange	5.64	5.68	5.6	0.09	0.792	0.847	FALSE	No_SigChange	5.79	6.15	5.29	0.86	0.00537	0.012	FALSE	No_SigChange	5.5	5.68	5.29	0.39	0.219	0.269	FALSE	No_SigChange	Intergenic	RLTR9D|LTR|ERVK	-41416	NM_133728	Asnsd1	0.023679	0.525455	RLTR9D	ERVK	LTR	LTR
chr1	53581380	53581890	6.91	6.93	6.89	0.04	0.854	0.921	FALSE	No_SigChange	6.64	6.93	6.27	0.66	0.00939	0.0317	FALSE	No_SigChange	6.65	6.89	6.36	0.53	0.0603	0.092	FALSE	No_SigChange	6.67	6.93	6.36	0.57	0.0246	0.0383	FALSE	No_SigChange	intron	RLTR9D|LTR|ERVK	125149	NM_001252070	Dnah7a	0.005894	0.490196	RLTR9D	ERVK	LTR	LTR
chr1	53613410	53613760	5.68	4.17	6.4	-2.23	0.00526	0.0232	FALSE	No_SigChange	4.43	4.17	4.66	-0.49	0.387	0.491	FALSE	No_SigChange	6	6.39	5.44	0.95	0.00118	0.00333	TRUE	SigDecrease	4.94	4.17	5.44	-1.27	0.119	0.156	FALSE	No_SigChange	intron	MMERVK9C_I-int|LTR|ERVK	93199	NM_001252070	Dnah7a	0.037249	0.605714	MMERVK9C_I-int	ERVK	LTR	LTR
chr1	53706330	53707010	7.98	8.05	7.89	0.16	0.407	0.592	FALSE	No_SigChange	7.8	8.05	7.48	0.57	0.0255	0.0645	FALSE	No_SigChange	7.56	7.89	7.12	0.77	0.000427	0.00141	TRUE	SigDecrease	7.66	8.05	7.12	0.93	8.27e-05	0.000234	TRUE	SigDecrease	intron	CpG	114	NM_001252070	Dnah7a	0.050074	0.554412	CpG	CpG	CpG	Other
chr1	53711090	53711430	4.69	4.36	4.97	-0.61	0.148	0.297	FALSE	No_SigChange	4.55	4.36	4.71	-0.36	0.392	0.496	FALSE	No_SigChange	5.42	4.96	5.77	-0.81	0.021	0.0376	FALSE	No_SigChange	5.23	4.36	5.77	-1.42	5.28e-05	0.000156	TRUE	SigIncrease	Intergenic	Intergenic	-4476	NM_001252070	Dnah7a	0.023599	0.494118	Intergenic	Intergenic	Intergenic	Other
chr1	53748680	53748900	5.81	6.06	5.51	0.55	0.025	0.0784	FALSE	No_SigChange	5.57	6.05	4.85	1.21	0.000227	0.00192	TRUE	SigDecrease	4.87	5.51	3.7	1.81	0.0292	0.0498	FALSE	No_SigChange	5.31	6.05	3.7	2.35	0.00362	0.00694	TRUE	SigDecrease	Intergenic	MMERVK9C_I-int|LTR|ERVK	36425	NM_133810	Stk17b	0.031963	0.65	MMERVK9C_I-int	ERVK	LTR	LTR
chr1	53749970	53750450	6.54	6.49	6.58	-0.09	0.731	0.845	FALSE	No_SigChange	6.09	6.49	5.53	0.96	0.00312	0.0142	FALSE	No_SigChange	6.07	6.58	5.29	1.29	3.71e-05	0.000174	TRUE	SigDecrease	6.01	6.49	5.29	1.2	0.000167	0.000441	TRUE	SigDecrease	Intergenic	MMERVK9C_I-int|LTR|ERVK	35005	NM_133810	Stk17b	0.002088	0.427083	MMERVK9C_I-int	ERVK	LTR	LTR
chr1	53751100	53751410	6.64	6.35	6.88	-0.53	0.0269	0.0829	FALSE	No_SigChange	6.1	6.35	5.81	0.54	0.0843	0.154	FALSE	No_SigChange	6.46	6.88	5.88	1	0.00168	0.00451	TRUE	SigDecrease	6.13	6.35	5.88	0.46	0.139	0.18	FALSE	No_SigChange	Intergenic	Lx4A|LINE|L1	33960	NM_133810	Stk17b	0.003236	0.493548	Lx4A	L1	LINE	LINE
chr1	53784380	53785680	9.2	9.21	9.19	0.02	0.94	0.969	FALSE	No_SigChange	8.98	9.21	8.72	0.48	0.0607	0.121	FALSE	No_SigChange	8.92	9.19	8.58	0.61	0.0216	0.0386	FALSE	No_SigChange	8.93	9.2	8.58	0.62	0.00831	0.0146	FALSE	No_SigChange	intron	CpG	185	NM_133810	Stk17b	0.077752	0.602308	CpG	CpG	CpG	Other
chr1	53823600	53824230	7.89	7.99	7.78	0.21	0.373	0.561	FALSE	No_SigChange	7.55	7.99	6.9	1.09	6.43e-05	0.000711	TRUE	SigDecrease	7.25	7.78	6.39	1.39	3.58e-09	5.44e-08	TRUE	SigDecrease	7.4	7.99	6.39	1.6	1.5e-09	1.18e-08	TRUE	SigDecrease	intron	intron (NM_001001883, intron 28 of 28)	-38700	NM_133810	Stk17b	0.014308	0.452381	intron	intron	intron	Other
chr1	53866400	53867730	7.87	7.62	8.09	-0.47	0.0103	0.0396	FALSE	No_SigChange	7.48	7.61	7.34	0.28	0.24	0.34	FALSE	No_SigChange	7.93	8.08	7.76	0.32	0.23	0.289	FALSE	No_SigChange	7.69	7.61	7.76	-0.15	0.582	0.634	FALSE	No_SigChange	intron	intron (NM_001001883, intron 18 of 28)	-81850	NM_133810	Stk17b	0.003762	0.433835	intron	intron	intron	Other
chr1	53894530	53894980	5.75	5.55	5.93	-0.38	0.142	0.289	FALSE	No_SigChange	5.09	5.55	4.43	1.12	0.00306	0.0139	FALSE	No_SigChange	5.61	5.93	5.21	0.72	0.0191	0.0348	FALSE	No_SigChange	5.39	5.54	5.21	0.34	0.321	0.378	FALSE	No_SigChange	intron	intron (NM_001001883, intron 14 of 28)	-109540	NM_133810	Stk17b	0.013363	0.48	intron	intron	intron	Other
chr1	53909110	53909340	5	4.39	5.43	-1.03	0.00103	0.00624	TRUE	SigIncrease	4.41	4.39	4.43	-0.04	0.941	0.959	FALSE	No_SigChange	5.36	5.42	5.28	0.14	0.647	0.699	FALSE	No_SigChange	4.91	4.39	5.28	-0.89	0.0129	0.0216	FALSE	No_SigChange	intron	intron (NM_001001883, intron 13 of 28)	-124010	NM_133810	Stk17b	0.004367	0.33913	intron	intron	intron	Other
chr1	54039230	54039470	5.31	5.16	5.45	-0.29	0.289	0.473	FALSE	No_SigChange	5.28	5.16	5.39	-0.23	0.454	0.556	FALSE	No_SigChange	5.36	5.45	5.27	0.18	0.505	0.568	FALSE	No_SigChange	5.21	5.16	5.27	-0.11	0.711	0.752	FALSE	No_SigChange	intron	intron (NM_001001883, intron 2 of 28)	155684	NM_001001883	Hecw2	0.012552	0.4	intron	intron	intron	Other
chr1	54194060	54195410	9.42	9.29	9.54	-0.24	0.221	0.394	FALSE	No_SigChange	9.14	9.29	8.97	0.32	0.231	0.33	FALSE	No_SigChange	9.22	9.54	8.82	0.71	0.00334	0.00806	TRUE	SigDecrease	9.08	9.29	8.82	0.47	0.0483	0.0699	FALSE	No_SigChange	intron	CpG	299	NM_001001883	Hecw2	0.111935	0.673333	CpG	CpG	CpG	Other
chr1	54250210	54251310	9.35	9.41	9.29	0.11	0.542	0.709	FALSE	No_SigChange	9.18	9.41	8.91	0.5	0.0304	0.0733	FALSE	No_SigChange	9.02	9.29	8.68	0.61	0.0152	0.0286	FALSE	No_SigChange	9.09	9.4	8.68	0.72	0.00181	0.00372	TRUE	SigDecrease	promoter-TSS	promoter-TSS (NM_030025)	77	NM_030025	Ccdc150	0.040036	0.52	promoter-TSS	promoter-TSS	promoter-TSS	Other
chr1	54275570	54275760	5.37	5.55	5.16	0.39	0.188	0.352	FALSE	No_SigChange	5.04	5.55	4.23	1.32	0.000187	0.00164	TRUE	SigDecrease	4.63	5.16	3.81	1.35	0.000328	0.00113	TRUE	SigDecrease	4.93	5.55	3.81	1.75	5.61e-06	2.05e-05	TRUE	SigDecrease	intron	RLTR31_Mur|LTR|ERVK	24982	NM_030025	Ccdc150	0.010582	0.552632	RLTR31_Mur	ERVK	LTR	LTR
chr1	54381310	54381900	7.02	6.78	7.23	-0.45	0.0251	0.0785	FALSE	No_SigChange	6.77	6.78	6.75	0.03	0.919	0.943	FALSE	No_SigChange	7.08	7.22	6.91	0.31	0.16	0.211	FALSE	No_SigChange	6.85	6.78	6.91	-0.14	0.551	0.605	FALSE	No_SigChange	Intergenic	Intergenic	57366	NM_001033194	Gtf3c3	0.005093	0.415254	Intergenic	Intergenic	Intergenic	Other
chr1	54384130	54384650	6.46	6.11	6.73	-0.62	0.0091	0.0358	FALSE	No_SigChange	5.97	6.11	5.81	0.31	0.333	0.437	FALSE	No_SigChange	6.37	6.73	5.88	0.85	0.000673	0.00208	TRUE	SigDecrease	6	6.11	5.88	0.23	0.445	0.502	FALSE	No_SigChange	Intergenic	Intergenic	54581	NM_001033194	Gtf3c3	0.003854	0.401923	Intergenic	Intergenic	Intergenic	Other
chr1	54438600	54439480	7.71	7.7	7.71	-0.01	0.945	0.972	FALSE	No_SigChange	7.62	7.7	7.53	0.17	0.479	0.58	FALSE	No_SigChange	7.58	7.71	7.43	0.28	0.222	0.28	FALSE	No_SigChange	7.57	7.7	7.43	0.26	0.232	0.283	FALSE	No_SigChange	promoter-TSS	promoter-TSS (NM_001033194)	-69	NM_001033194	Gtf3c3	0.042093	0.527273	promoter-TSS	promoter-TSS	promoter-TSS	Other
chr1	54484650	54485460	8.02	7.76	8.24	-0.48	0.0397	0.112	FALSE	No_SigChange	6.99	7.76	5.23	2.53	3.87e-05	0.000473	TRUE	SigDecrease	7.54	8.23	6.13	2.1	1.34e-12	5.07e-11	TRUE	SigDecrease	7.16	7.76	6.13	1.63	3.32e-07	1.57e-06	TRUE	SigDecrease	intron	L1MA4|LINE|L1	-46084	NM_001033194	Gtf3c3	0.003708	0.417284	L1MA4	L1	LINE	LINE
chr1	54498650	54499060	5.58	4.86	6.05	-1.2	5.19e-05	0.000542	TRUE	SigIncrease	4.08	4.86	2.25	2.61	4.14e-06	7.76e-05	TRUE	SigDecrease	5.61	6.05	4.95	1.1	0.000365	0.00124	TRUE	SigDecrease	4.91	4.86	4.95	-0.1	0.804	0.834	FALSE	No_SigChange	intron	MIRb|SINE|MIR	58829	NM_001163314	Pgap1	0.00978	0.490244	MIRb	MIR	SINE	SINE
chr1	54557000	54558220	9.21	9.24	9.19	0.05	0.799	0.888	FALSE	No_SigChange	9.1	9.24	8.94	0.3	0.22	0.318	FALSE	No_SigChange	8.87	9.19	8.47	0.71	0.00663	0.0143	FALSE	No_SigChange	8.91	9.24	8.47	0.77	0.00187	0.00385	TRUE	SigDecrease	promoter-TSS	promoter-TSS (NM_001163314)	74	NM_001163314	Pgap1	0.059065	0.592623	promoter-TSS	promoter-TSS	promoter-TSS	Other
chr1	54566230	54566700	5.91	5.22	6.37	-1.15	0.000257	0.00203	TRUE	SigIncrease	5.2	5.22	5.18	0.04	0.921	0.944	FALSE	No_SigChange	6.4	6.37	6.43	-0.07	0.811	0.844	FALSE	No_SigChange	5.95	5.22	6.43	-1.22	0.000346	0.000849	TRUE	SigIncrease	Intergenic	MLTR31FA_MM|LTR|ERVK	-8781	NM_001163314	Pgap1	0.006397	0.387234	MLTR31FA_MM	ERVK	LTR	LTR
chr1	54570110	54570490	5.37	5.38	5.37	0.02	0.958	0.978	FALSE	No_SigChange	5.1	5.38	4.75	0.63	0.0946	0.168	FALSE	No_SigChange	5.39	5.36	5.42	-0.05	0.895	0.915	FALSE	No_SigChange	5.4	5.38	5.42	-0.04	0.929	0.941	FALSE	No_SigChange	Intergenic	RLTR20B5_MM|LTR|ERVK	-12616	NM_001163314	Pgap1	0.013193	0.476316	RLTR20B5_MM	ERVK	LTR	LTR
chr1	54585440	54585750	5.37	5.54	5.18	0.36	0.216	0.388	FALSE	No_SigChange	5.15	5.54	4.61	0.92	0.0068	0.0251	FALSE	No_SigChange	4.92	5.18	4.61	0.56	0.125	0.172	FALSE	No_SigChange	5.15	5.54	4.61	0.92	0.0167	0.0271	FALSE	No_SigChange	Intergenic	L1MB3|LINE|L1	-27911	NM_001163314	Pgap1	0.02589	0.454839	L1MB3	L1	LINE	LINE
chr1	54618740	54619060	4.04	0.81	4.97	-4.16	3.2e-10	1.92e-08	TRUE	SigIncrease	1.58	0.81	2.09	-1.28	0.254	0.354	FALSE	No_SigChange	5.1	4.96	5.23	-0.26	0.385	0.451	FALSE	No_SigChange	4.29	0.8	5.23	-4.42	1.8e-11	2.16e-10	TRUE	SigIncrease	Intergenic	RMER13A1|LTR|ERVK	-61216	NM_001163314	Pgap1	0.021944	0.5125	RMER13A1	ERVK	LTR	LTR
chr1	54665980	54666210	5.27	5.47	5.03	0.43	0.121	0.257	FALSE	No_SigChange	5.16	5.47	4.77	0.7	0.0251	0.0638	FALSE	No_SigChange	4.92	5.03	4.79	0.24	0.446	0.511	FALSE	No_SigChange	5.17	5.47	4.79	0.67	0.0278	0.0427	FALSE	No_SigChange	intron	intron (NM_001081433, intron 18 of 27)	-108411	NM_001163314	Pgap1	0.008734	0.46087	intron	intron	intron	Other
chr1	54759930	54760170	6.43	6.44	6.43	0.01	0.975	0.987	FALSE	No_SigChange	6.18	6.44	5.86	0.58	0.0446	0.0965	FALSE	No_SigChange	6.34	6.43	6.25	0.18	0.47	0.534	FALSE	No_SigChange	6.34	6.44	6.25	0.19	0.481	0.538	FALSE	No_SigChange	intron	intron (NM_001081433, intron 8 of 27)	166337	NM_001081433	Ankrd44	0	0.545833	intron	intron	intron	Other
chr1	54776220	54776520	6.21	5.61	6.64	-1.03	1.02e-05	0.000139	TRUE	SigIncrease	5.3	5.61	4.91	0.7	0.033	0.0776	FALSE	No_SigChange	6.31	6.64	5.89	0.74	0.00248	0.00625	TRUE	SigDecrease	5.76	5.6	5.89	-0.29	0.279	0.334	FALSE	No_SigChange	intron	intron (NM_001081433, intron 4 of 27)	150017	NM_001081433	Ankrd44	0.023411	0.533333	intron	intron	intron	Other
chr1	54816880	54817210	5.95	5.89	6.01	-0.11	0.646	0.787	FALSE	No_SigChange	5.5	5.89	4.95	0.94	0.00297	0.0136	FALSE	No_SigChange	5.71	6	5.34	0.66	0.0242	0.0423	FALSE	No_SigChange	5.64	5.89	5.34	0.55	0.0638	0.0895	FALSE	No_SigChange	intron	RLTR11A2|LTR|ERVK	109342	NM_001081433	Ankrd44	0.006079	0.460606	RLTR11A2	ERVK	LTR	LTR
chr1	54912550	54912800	4.05	1.91	4.88	-2.98	4.49e-07	9.86e-06	TRUE	SigIncrease	2.58	1.91	3.04	-1.14	0.213	0.311	FALSE	No_SigChange	4.29	4.88	3.28	1.6	0.000211	0.000774	TRUE	SigDecrease	2.75	1.9	3.28	-1.38	0.106	0.142	FALSE	No_SigChange	intron	intron (NM_001081433, intron 1 of 27)	13712	NM_001081433	Ankrd44	0.012048	0.5	intron	intron	intron	Other
chr1	54925420	54926920	9.55	9.48	9.62	-0.14	0.488	0.664	FALSE	No_SigChange	9.23	9.48	8.93	0.55	0.0293	0.0713	FALSE	No_SigChange	9.31	9.62	8.93	0.69	0.0058	0.0128	FALSE	No_SigChange	9.23	9.48	8.93	0.55	0.022	0.0346	FALSE	No_SigChange	5'UTR	5' UTR (NM_001081433, exon 1 of 28)	217	NM_001081433	Ankrd44	0.090727	0.662	5'UTR	5'UTR	5'UTR	Other
chr1	54979410	54979620	5.1	5.16	5.04	0.12	0.703	0.826	FALSE	No_SigChange	5	5.16	4.83	0.33	0.337	0.441	FALSE	No_SigChange	4.55	5.04	3.81	1.24	0.00639	0.0138	FALSE	No_SigChange	4.63	5.16	3.81	1.35	0.00452	0.00844	TRUE	SigDecrease	Intergenic	Intergenic	47963	NM_031179	Sf3b1	0	0.404762	Intergenic	Intergenic	Intergenic	Other
chr1	54983080	54983780	6.53	6.26	6.75	-0.5	0.0337	0.0985	FALSE	No_SigChange	6	6.26	5.69	0.56	0.0599	0.12	FALSE	No_SigChange	6.72	6.75	6.68	0.07	0.79	0.826	FALSE	No_SigChange	6.48	6.25	6.68	-0.43	0.116	0.153	FALSE	No_SigChange	Intergenic	Intergenic	44048	NM_031179	Sf3b1	0.012876	0.441429	Intergenic	Intergenic	Intergenic	Other
chr1	55027010	55028010	9.09	9.12	9.05	0.06	0.74	0.851	FALSE	No_SigChange	8.94	9.12	8.73	0.38	0.149	0.236	FALSE	No_SigChange	8.89	9.05	8.71	0.34	0.164	0.216	FALSE	No_SigChange	8.93	9.12	8.71	0.41	0.08	0.11	FALSE	No_SigChange	promoter-TSS	promoter-TSS (NM_031179)	-32	NM_031179	Sf3b1	0.083083	0.605	promoter-TSS	promoter-TSS	promoter-TSS	Other
chr1	55029190	55029570	5.27	4.79	5.62	-0.83	0.0253	0.079	FALSE	No_SigChange	4.95	4.79	5.1	-0.3	0.472	0.574	FALSE	No_SigChange	5.43	5.62	5.21	0.41	0.307	0.371	FALSE	No_SigChange	5.02	4.79	5.21	-0.42	0.386	0.444	FALSE	No_SigChange	Intergenic	Intergenic	-1902	NM_031179	Sf3b1	0.005277	0.460526	Intergenic	Intergenic	Intergenic	Other
chr1	55042450	55042610	4.79	4.66	4.91	-0.25	0.517	0.688	FALSE	No_SigChange	4.44	4.66	4.19	0.47	0.353	0.458	FALSE	No_SigChange	4.23	4.9	2.91	2	1.29e-05	7.03e-05	TRUE	SigDecrease	4.03	4.66	2.91	1.75	0.00193	0.00395	TRUE	SigDecrease	Intergenic	RodERV21-int|LTR|ERV1	-10240	NM_001039710	Coq10b	0	0.45	RodERV21-int	ERV1	LTR	LTR
chr1	55052200	55053410	9.84	9.79	9.88	-0.09	0.619	0.768	FALSE	No_SigChange	9.59	9.79	9.36	0.43	0.0839	0.153	FALSE	No_SigChange	9.52	9.88	9.05	0.84	0.000339	0.00116	TRUE	SigDecrease	9.47	9.79	9.05	0.74	0.000312	0.000775	TRUE	SigDecrease	promoter-TSS	promoter-TSS (NM_001039710)	35	NM_026424	Coq10b	0.084367	0.624793	promoter-TSS	promoter-TSS	promoter-TSS	Other
chr1	55075640	55076120	5.97	5.85	6.09	-0.24	0.44	0.623	FALSE	No_SigChange	5.33	5.84	4.54	1.3	0.0032	0.0144	FALSE	No_SigChange	5.29	6.09	3.39	2.69	2.31e-13	1.08e-11	TRUE	SigDecrease	5.09	5.84	3.39	2.45	2.72e-09	2.03e-08	TRUE	SigDecrease	Intergenic	Lx3C|LINE|L1	12052	NM_010477	Hspd1	0.006263	0.454167	Lx3C	L1	LINE	LINE
chr1	55076660	55077580	6.89	6.68	7.07	-0.38	0.206	0.375	FALSE	No_SigChange	6.52	6.68	6.34	0.35	0.317	0.421	FALSE	No_SigChange	6.63	7.06	6	1.06	2.19e-05	0.000111	TRUE	SigDecrease	6.38	6.68	6	0.68	0.0328	0.0495	FALSE	No_SigChange	TTS	TTS (NM_010477)	10812	NM_010477	Hspd1	0.005441	0.411957	TTS	TTS	TTS	Other
chr1	55082270	55082610	5.46	5.69	5.18	0.51	0.0958	0.216	FALSE	No_SigChange	5.06	5.69	3.91	1.79	1.16e-06	2.76e-05	TRUE	SigDecrease	4.31	5.18	1.81	3.37	1.98e-09	3.22e-08	TRUE	SigDecrease	4.79	5.69	1.81	3.88	4.98e-14	1.07e-12	TRUE	SigDecrease	intron	B3|SINE|B2	5492	NM_010477	Hspd1	0.00295	0.426471	B3	B2	SINE	SINE
chr1	55086980	55088790	10.15	10.15	10.15	0	0.998	1	FALSE	No_SigChange	9.92	10.15	9.64	0.5	0.0438	0.0952	FALSE	No_SigChange	9.82	10.15	9.39	0.75	0.00256	0.00642	TRUE	SigDecrease	9.82	10.15	9.39	0.75	0.000756	0.00171	TRUE	SigDecrease	promoter-TSS	promoter-TSS (NM_010477)	47	NM_010477	Hspd1	0.086235	0.646409	promoter-TSS	promoter-TSS	promoter-TSS	Other
chr1	55102830	55103480	6.35	6.56	6.11	0.44	0.0767	0.183	FALSE	No_SigChange	6.34	6.56	6.08	0.47	0.1	0.175	FALSE	No_SigChange	6.13	6.11	6.15	-0.04	0.879	0.902	FALSE	No_SigChange	6.37	6.56	6.15	0.4	0.183	0.229	FALSE	No_SigChange	Intergenic	RMER13B|LTR|ERVK	15007	NM_008303	Hspe1	0.016949	0.529231	RMER13B	ERVK	LTR	LTR
chr1	55108320	55109540	8.08	7.9	8.24	-0.33	0.198	0.365	FALSE	No_SigChange	7.52	7.9	6.99	0.91	0.00384	0.0165	FALSE	No_SigChange	7.9	8.24	7.46	0.78	0.00219	0.00563	TRUE	SigDecrease	7.7	7.9	7.46	0.44	0.125	0.163	FALSE	No_SigChange	Intergenic	RMER17C|LTR|ERVK	20782	NM_008303	Hspe1	0.008203	0.47541	RMER17C	ERVK	LTR	LTR
chr1	55130710	55131980	9.65	9.66	9.63	0.03	0.876	0.934	FALSE	No_SigChange	9.41	9.66	9.12	0.54	0.0208	0.0558	FALSE	No_SigChange	9.35	9.63	9	0.63	0.00578	0.0127	FALSE	No_SigChange	9.36	9.66	9	0.66	0.00162	0.00339	TRUE	SigDecrease	promoter-TSS	promoter-TSS (NM_025283)	100	NM_025283	Mob4	0.074862	0.619685	promoter-TSS	promoter-TSS	promoter-TSS	Other
chr1	55135870	55136120	5.24	5.17	5.31	-0.14	0.67	0.804	FALSE	No_SigChange	4.94	5.17	4.67	0.5	0.192	0.287	FALSE	No_SigChange	5.09	5.31	4.83	0.48	0.205	0.262	FALSE	No_SigChange	5.01	5.17	4.83	0.34	0.414	0.472	FALSE	No_SigChange	intron	B3|SINE|B2	4750	NM_025283	Mob4	0	0.456	B3	B2	SINE	SINE
chr1	55161810	55162420	7.43	7.27	7.57	-0.3	0.175	0.335	FALSE	No_SigChange	6.94	7.27	6.52	0.76	0.00775	0.0275	FALSE	No_SigChange	7.17	7.57	6.63	0.94	0.000272	0.000962	TRUE	SigDecrease	6.99	7.27	6.63	0.64	0.00628	0.0114	FALSE	No_SigChange	Intergenic	B3A|SINE|B2	30870	NM_025283	Mob4	0.019704	0.5	B3A	B2	SINE	SINE
chr1	55162790	55163250	6.49	6.37	6.59	-0.22	0.324	0.511	FALSE	No_SigChange	5.94	6.37	5.31	1.06	0.000399	0.00297	TRUE	SigDecrease	5.9	6.59	4.51	2.08	2.44e-12	8.64e-11	TRUE	SigDecrease	5.72	6.37	4.51	1.87	9.65e-09	6.38e-08	TRUE	SigDecrease	Intergenic	Intergenic	31775	NM_025283	Mob4	0.010893	0.463043	Intergenic	Intergenic	Intergenic	Other
chr1	55163980	55164560	6.97	7.36	6.45	0.91	0.000129	0.00114	TRUE	SigDecrease	7.18	7.36	6.99	0.37	0.167	0.258	FALSE	No_SigChange	6.16	6.45	5.79	0.66	0.00741	0.0157	FALSE	No_SigChange	6.77	7.36	5.79	1.57	8.7e-10	7.27e-09	TRUE	SigDecrease	Intergenic	Intergenic	33025	NM_025283	Mob4	0.010363	0.494828	Intergenic	Intergenic	Intergenic	Other
chr1	55192870	55193280	5.62	5.38	5.83	-0.44	0.0834	0.195	FALSE	No_SigChange	5.56	5.38	5.72	-0.34	0.235	0.334	FALSE	No_SigChange	5.53	5.82	5.16	0.67	0.0142	0.027	FALSE	No_SigChange	5.27	5.38	5.16	0.22	0.454	0.512	FALSE	No_SigChange	intron	B3|SINE|B2	33707	NM_028713	Rftn2	0.00978	0.443902	B3	B2	SINE	SINE
chr1	55196630	55196820	4.48	4.91	3.86	1.05	0.0127	0.0465	FALSE	No_SigChange	4.23	4.91	2.91	2	7.92e-05	0.000838	TRUE	SigDecrease	2.95	3.86	0	3.86	2.99e-05	0.000145	TRUE	SigDecrease	3.95	4.9	0	4.91	4e-09	2.87e-08	TRUE	SigDecrease	intron	intron (NM_028713, intron 5 of 8)	30057	NM_028713	Rftn2	0.021164	0.473684	intron	intron	intron	Other
chr1	55198550	55199300	7.81	7.65	7.95	-0.31	0.217	0.389	FALSE	No_SigChange	7.25	7.64	6.71	0.93	0.00297	0.0136	FALSE	No_SigChange	7.42	7.95	6.58	1.37	3.08e-06	2.04e-05	TRUE	SigDecrease	7.21	7.64	6.58	1.06	0.0014	0.00295	TRUE	SigDecrease	intron	PB1D7|SINE|Alu	27857	NM_028713	Rftn2	0.006676	0.506667	PB1D7	Alu	SINE	SINE
chr1	55205940	55206280	6.21	6.3	6.11	0.19	0.443	0.625	FALSE	No_SigChange	5.86	6.3	5.23	1.07	0.00193	0.00991	TRUE	SigDecrease	5.71	6.11	5.16	0.95	0.000564	0.00179	TRUE	SigDecrease	5.84	6.3	5.16	1.14	0.000117	0.000319	TRUE	SigDecrease	intron	intron (NM_028713, intron 4 of 8)	20672	NM_028713	Rftn2	0.00885	0.464706	intron	intron	intron	Other
chr1	55210310	55210910	5.82	5.92	5.72	0.2	0.436	0.619	FALSE	No_SigChange	5.59	5.92	5.17	0.75	0.0153	0.0447	FALSE	No_SigChange	5.19	5.72	4.34	1.38	1.36e-05	7.35e-05	TRUE	SigDecrease	5.33	5.92	4.34	1.58	2.55e-06	1e-05	TRUE	SigDecrease	intron	MT2A|LTR|ERVL	16172	NM_028713	Rftn2	0.015025	0.503333	MT2A	ERVL	LTR	LTR
chr1	55212790	55213870	6.95	6.99	6.92	0.07	0.764	0.867	FALSE	No_SigChange	7.12	6.98	7.25	-0.26	0.311	0.415	FALSE	No_SigChange	6.61	6.91	6.23	0.68	0.0127	0.0246	FALSE	No_SigChange	6.66	6.98	6.23	0.75	0.00148	0.00311	TRUE	SigDecrease	intron	intron (NM_028713, intron 2 of 8)	13452	NM_028713	Rftn2	0.011121	0.457407	intron	intron	intron	Other
chr1	55226170	55226760	6.38	6.92	5.51	1.41	1.22e-06	2.32e-05	TRUE	SigDecrease	6.42	6.92	5.66	1.26	2.48e-05	0.000332	TRUE	SigDecrease	4.99	5.51	4.17	1.34	0.000566	0.00179	TRUE	SigDecrease	6.12	6.92	4.17	2.75	8.47e-14	1.73e-12	TRUE	SigDecrease	5'UTR	5' UTR (NM_028713, exon 1 of 9)	317	NM_028713	Rftn2	0.037351	0.49322	5'UTR	5'UTR	5'UTR	Other
chr1	55235320	55235590	5.49	5.63	5.34	0.29	0.335	0.522	FALSE	No_SigChange	5.55	5.63	5.46	0.17	0.597	0.685	FALSE	No_SigChange	4.93	5.34	4.37	0.96	0.00796	0.0166	FALSE	No_SigChange	5.13	5.63	4.37	1.25	0.000325	0.000802	TRUE	SigDecrease	Intergenic	RLTR9F|LTR|ERVK	-1722	NM_175439	Mars2	0.037175	0.588889	RLTR9F	ERVK	LTR	LTR
[truncated: 82,208 more rows]

## Sheet: GABPA ChIP-seq
# Enriched regions were identified using the ‘dpeak’ peak-calling algorithm of DANPOS v2.2.2 (Chen et al., 2013) with the options –m, –kd 250, -kw 150 and –p 1e-100 and filtered further (see Materials and Methods).
[truncated: 4,737 more rows]

[truncated: 4 more sheets: MAX ChIP-seq, NRF1 ChIP-seq, SP1 ChIP-seq, YY1 ChIP-seq]
