# Supplementary material for: Distinct contributions of DNA methylation and histone acetylation to the genomic occupancy of transcription factors
Source: HighWire-hosted journal article supplement (doi:10.1101/gr.257576.119), 2020-09-22
Supplement: Supplemental_Table_S3.xlsx [file Supplemental_Table_S3.xlsx]

## Sheet: Table Legend
Raw read counts and differential analyses results at repetitive elements

## Sheet: Differential analysis results
# Differential analysis performed with DESeq2, Significance was called with a "padj" value < 0.05
Data	RepName	RepClass	RepType	Comparison	baseMean	log2FoldChange	lfcSE	stat	pvalue	padj	Significant	SigChange
ATAC	4.5SRNA	scRNA	scRNA	J1.TSA.vs.J1.DMSO	16308	-0.251668	0.103989	-2.42013	0.015515	0.0621979	FALSE	NoSigChange
ATAC	5S	rRNA	rRNA	J1.TSA.vs.J1.DMSO	8878.21	-0.324178	0.0904415	-3.58439	0.00033787	0.00402165	TRUE	SigDecrease
ATAC	7SK	RNA	RNA	J1.TSA.vs.J1.DMSO	5260.19	0.0297675	0.0343962	0.865431	0.386802	0.501026	FALSE	NoSigChange
ATAC	7SLRNA	srpRNA	srpRNA	J1.TSA.vs.J1.DMSO	3261.25	-0.0762219	0.0670945	-1.13604	0.255941	0.371054	FALSE	NoSigChange
ATAC	A-rich	Low_complexity	Low_complexity	J1.TSA.vs.J1.DMSO	50025.8	0.19901	0.112016	1.77662	0.0756313	0.164428	FALSE	NoSigChange
ATAC	AAATGn	Simple_repeat	Simple_repeat	J1.TSA.vs.J1.DMSO	168.563	0.213909	0.161425	1.32513	0.185129	0.29806	FALSE	NoSigChange
ATAC	AACTGn	Simple_repeat	Simple_repeat	J1.TSA.vs.J1.DMSO	387.439	0.175818	0.0941719	1.86699	0.0619027	0.143915	FALSE	NoSigChange
ATAC	AAGTGn	Simple_repeat	Simple_repeat	J1.TSA.vs.J1.DMSO	55.5441	-0.504157	0.214888	-2.34614	0.0189691	0.0705741	FALSE	NoSigChange
ATAC	AATAGn	Simple_repeat	Simple_repeat	J1.TSA.vs.J1.DMSO	325.178	0.489649	0.168878	2.89943	0.00373842	0.0226358	TRUE	SigIncrease
ATAC	AATTGn	Simple_repeat	Simple_repeat	J1.TSA.vs.J1.DMSO	69.2853	0.420269	0.173714	2.41932	0.0155495	0.0621979	FALSE	NoSigChange
ATAC	ACATGn	Simple_repeat	Simple_repeat	J1.TSA.vs.J1.DMSO	134.684	0.166754	0.149167	1.1179	0.263609	0.377956	FALSE	NoSigChange
ATAC	ACCGn	Simple_repeat	Simple_repeat	J1.TSA.vs.J1.DMSO	86.7203	-0.155989	0.143937	-1.08374	0.278482	0.394775	FALSE	NoSigChange
ATAC	ACCTGn	Simple_repeat	Simple_repeat	J1.TSA.vs.J1.DMSO	170.987	-0.0149743	0.153549	-0.0975209	0.922313	0.939968	FALSE	NoSigChange
ATAC	ACGTGn	Simple_repeat	Simple_repeat	J1.TSA.vs.J1.DMSO	33.1947	0.20767	0.288938	0.718737	0.472303	0.583855	FALSE	NoSigChange
ATAC	ACTAGn	Simple_repeat	Simple_repeat	J1.TSA.vs.J1.DMSO	201.667	0.178678	0.112573	1.58722	0.112463	0.212798	FALSE	NoSigChange
ATAC	ACTCGn	Simple_repeat	Simple_repeat	J1.TSA.vs.J1.DMSO	12.8575	0.149641	0.395787	0.378085	0.705367	0.773613	FALSE	NoSigChange
ATAC	ACTGn	Simple_repeat	Simple_repeat	J1.TSA.vs.J1.DMSO	1035.93	0.0265807	0.0565832	0.469763	0.638524	0.725446	FALSE	NoSigChange
ATAC	ACTTGn	Simple_repeat	Simple_repeat	J1.TSA.vs.J1.DMSO	12.5114	-0.240933	0.407074	-0.591867	0.55394	0.656316	FALSE	NoSigChange
ATAC	AGATGn	Simple_repeat	Simple_repeat	J1.TSA.vs.J1.DMSO	104.917	0.393716	0.12592	3.12671	0.00176772	0.0134451	TRUE	SigIncrease
ATAC	AGCTGn	Simple_repeat	Simple_repeat	J1.TSA.vs.J1.DMSO	718.858	-0.277992	0.0997971	-2.78557	0.00534336	0.0295829	TRUE	SigDecrease
ATAC	AGGGGGn	Simple_repeat	Simple_repeat	J1.TSA.vs.J1.DMSO	4331.62	-0.0359823	0.0787397	-0.456977	0.647687	0.73313	FALSE	NoSigChange
ATAC	AGGTGn	Simple_repeat	Simple_repeat	J1.TSA.vs.J1.DMSO	519.767	0.133745	0.0742807	1.80054	0.0717761	0.157867	FALSE	NoSigChange
ATAC	AGTAGn	Simple_repeat	Simple_repeat	J1.TSA.vs.J1.DMSO	194.24	0.11848	0.106054	1.11717	0.263923	0.378012	FALSE	NoSigChange
ATAC	AGTTGn	Simple_repeat	Simple_repeat	J1.TSA.vs.J1.DMSO	53.8709	0.129129	0.193573	0.667082	0.50472	0.61458	FALSE	NoSigChange
ATAC	AmnSINE1	SINE	Deu	J1.TSA.vs.J1.DMSO	7421.54	-0.0562785	0.0283353	-1.98616	0.0470156	0.122622	FALSE	NoSigChange
ATAC	AmnSINE2	SINE	Deu	J1.TSA.vs.J1.DMSO	2034.08	-0.044815	0.0539103	-0.831288	0.405811	0.518686	FALSE	NoSigChange
ATAC	An	Simple_repeat	Simple_repeat	J1.TSA.vs.J1.DMSO	30474.6	0.0733903	0.10696	0.686147	0.49262	0.603655	FALSE	NoSigChange
ATAC	Arthur1	DNA	hAT-Tip100	J1.TSA.vs.J1.DMSO	5653.96	0.205751	0.0999014	2.05954	0.0394425	0.109926	FALSE	NoSigChange
ATAC	Arthur1A	DNA	hAT-Tip100	J1.TSA.vs.J1.DMSO	790.013	0.046587	0.079972	0.582541	0.560202	0.662291	FALSE	NoSigChange
ATAC	Arthur1B	DNA	hAT-Tip100	J1.TSA.vs.J1.DMSO	3556.29	0.168507	0.0804617	2.09425	0.0362379	0.106169	FALSE	NoSigChange
ATAC	Arthur1C	DNA	hAT-Tip100	J1.TSA.vs.J1.DMSO	887.755	0.028466	0.063025	0.451661	0.651513	0.735333	FALSE	NoSigChange
ATAC	AT_rich	Low_complexity	Low_complexity	J1.TSA.vs.J1.DMSO	210943	0.608798	0.310397	1.96136	0.0498375	0.126816	FALSE	NoSigChange
ATAC	ATAAGn	Simple_repeat	Simple_repeat	J1.TSA.vs.J1.DMSO	96.4874	0.709406	0.219824	3.22716	0.00125027	0.0106653	TRUE	SigIncrease
ATAC	ATAGGn	Simple_repeat	Simple_repeat	J1.TSA.vs.J1.DMSO	181.684	0.245415	0.12825	1.91358	0.0556745	0.135223	FALSE	NoSigChange
ATAC	ATATGn	Simple_repeat	Simple_repeat	J1.TSA.vs.J1.DMSO	449.335	0.467451	0.196669	2.37684	0.0174615	0.0668995	FALSE	NoSigChange
ATAC	ATCTGn	Simple_repeat	Simple_repeat	J1.TSA.vs.J1.DMSO	41.2889	0.436372	0.230314	1.89469	0.058134	0.139161	FALSE	NoSigChange
ATAC	ATGGTGn	Simple_repeat	Simple_repeat	J1.TSA.vs.J1.DMSO	3657.76	0.126623	0.0800455	1.58189	0.113675	0.213603	FALSE	NoSigChange
ATAC	ATGn	Simple_repeat	Simple_repeat	J1.TSA.vs.J1.DMSO	6152.63	0.203518	0.100103	2.03308	0.0420441	0.115023	FALSE	NoSigChange
ATAC	ATGTGn	Simple_repeat	Simple_repeat	J1.TSA.vs.J1.DMSO	509.052	0.190922	0.0917986	2.07979	0.0375447	0.107148	FALSE	NoSigChange
ATAC	ATTAGn	Simple_repeat	Simple_repeat	J1.TSA.vs.J1.DMSO	118.252	0.260123	0.189261	1.37442	0.169312	0.280191	FALSE	NoSigChange
ATAC	ATTGn	Simple_repeat	Simple_repeat	J1.TSA.vs.J1.DMSO	3532.83	0.215477	0.0783242	2.75109	0.00593966	0.0320659	TRUE	SigIncrease
ATAC	ATTTGn	Simple_repeat	Simple_repeat	J1.TSA.vs.J1.DMSO	349.209	-0.0973833	0.0866967	-1.12326	0.261325	0.376006	FALSE	NoSigChange
ATAC	B1_Mm	SINE	Alu	J1.TSA.vs.J1.DMSO	236808	0.0429819	0.050805	0.846018	0.397543	0.510148	FALSE	NoSigChange
ATAC	B1_Mur1	SINE	Alu	J1.TSA.vs.J1.DMSO	210828	-0.0167454	0.0546088	-0.306642	0.759116	0.816777	FALSE	NoSigChange
ATAC	B1_Mur2	SINE	Alu	J1.TSA.vs.J1.DMSO	175434	-0.0199283	0.0560551	-0.355513	0.722205	0.788046	FALSE	NoSigChange
ATAC	B1_Mur3	SINE	Alu	J1.TSA.vs.J1.DMSO	138886	-0.0211529	0.0567555	-0.372702	0.70937	0.777337	FALSE	NoSigChange
ATAC	B1_Mur4	SINE	Alu	J1.TSA.vs.J1.DMSO	225124	-0.00761881	0.0573038	-0.132955	0.894229	0.918623	FALSE	NoSigChange
ATAC	B1_Mus1	SINE	Alu	J1.TSA.vs.J1.DMSO	542957	0.0165942	0.0516835	0.321074	0.748154	0.809776	FALSE	NoSigChange
ATAC	B1_Mus2	SINE	Alu	J1.TSA.vs.J1.DMSO	424417	-0.0239277	0.05816	-0.411411	0.680771	0.75783	FALSE	NoSigChange
ATAC	B1F	SINE	Alu	J1.TSA.vs.J1.DMSO	231834	-0.00365464	0.044957	-0.081292	0.93521	0.948728	FALSE	NoSigChange
ATAC	B1F1	SINE	Alu	J1.TSA.vs.J1.DMSO	103832	-0.0230631	0.0465457	-0.495494	0.620251	0.709384	FALSE	NoSigChange
ATAC	B1F2	SINE	Alu	J1.TSA.vs.J1.DMSO	88908.4	-0.031239	0.049974	-0.625105	0.531902	0.637127	FALSE	NoSigChange
ATAC	B2_Mm1a	SINE	B2	J1.TSA.vs.J1.DMSO	134394	-0.043104	0.103606	-0.416039	0.677381	0.754601	FALSE	NoSigChange
ATAC	B2_Mm1t	SINE	B2	J1.TSA.vs.J1.DMSO	164530	-0.00375849	0.0882209	-0.0426031	0.966018	0.971922	FALSE	NoSigChange
ATAC	B2_Mm2	SINE	B2	J1.TSA.vs.J1.DMSO	605033	0.00136522	0.0736874	0.0185272	0.985218	0.986496	FALSE	NoSigChange
ATAC	B3	SINE	B2	J1.TSA.vs.J1.DMSO	1.05296e+06	0.019036	0.0455981	0.417472	0.676333	0.754522	FALSE	NoSigChange
ATAC	B3A	SINE	B2	J1.TSA.vs.J1.DMSO	618609	0.0343396	0.0378712	0.906746	0.364541	0.477803	FALSE	NoSigChange
ATAC	B4	SINE	B4	J1.TSA.vs.J1.DMSO	418686	0.0636474	0.0464489	1.37027	0.170603	0.281774	FALSE	NoSigChange
ATAC	B4A	SINE	B4	J1.TSA.vs.J1.DMSO	740143	0.0729153	0.0457613	1.59338	0.111074	0.211988	FALSE	NoSigChange
ATAC	BC1_Mm	scRNA	scRNA	J1.TSA.vs.J1.DMSO	25104.1	0.0226882	0.0493132	0.460085	0.645456	0.731169	FALSE	NoSigChange
ATAC	BGLII	LTR	ERVK	J1.TSA.vs.J1.DMSO	42203.7	-0.487783	0.0643022	-7.58579	3.30471e-14	2.55123e-11	TRUE	SigDecrease
ATAC	BGLII_A	LTR	ERVK	J1.TSA.vs.J1.DMSO	4062.69	-0.314828	0.0611232	-5.15071	2.59508e-07	1.6695e-05	TRUE	SigDecrease
ATAC	BGLII_B	LTR	ERVK	J1.TSA.vs.J1.DMSO	16308.5	-0.151657	0.0520236	-2.91515	0.00355519	0.0219568	TRUE	SigDecrease
ATAC	BGLII_B2	LTR	ERVK	J1.TSA.vs.J1.DMSO	3721.94	-0.128856	0.0375886	-3.42805	0.000607923	0.00621611	TRUE	SigDecrease
ATAC	BGLII_C	LTR	ERVK	J1.TSA.vs.J1.DMSO	613.855	0.115998	0.0688746	1.68419	0.0921455	0.185618	FALSE	NoSigChange
ATAC	BGLII_Mur	LTR	ERVK	J1.TSA.vs.J1.DMSO	7462.47	-0.0986942	0.0347885	-2.83698	0.00455423	0.0259474	TRUE	SigDecrease
ATAC	BGLII_Mus	LTR	ERVK	J1.TSA.vs.J1.DMSO	9699.16	-0.267268	0.0640351	-4.17378	2.99593e-05	0.000650509	TRUE	SigDecrease
ATAC	BLACKJACK	DNA	hAT-Blackjack	J1.TSA.vs.J1.DMSO	4359.03	0.167025	0.123012	1.3578	0.174527	0.285758	FALSE	NoSigChange
ATAC	C-rich	Low_complexity	Low_complexity	J1.TSA.vs.J1.DMSO	166742	-0.243603	0.124422	-1.95788	0.0502439	0.127389	FALSE	NoSigChange
ATAC	C573_MM	Other	Other	J1.TSA.vs.J1.DMSO	4467.02	0.730984	0.143651	5.08861	3.60704e-07	2.22771e-05	TRUE	SigIncrease
ATAC	CAAAAAn	Simple_repeat	Simple_repeat	J1.TSA.vs.J1.DMSO	10709.9	0.177301	0.0931498	1.9034	0.0569884	0.13727	FALSE	NoSigChange
ATAC	CAAAAn	Simple_repeat	Simple_repeat	J1.TSA.vs.J1.DMSO	38297.4	0.149496	0.0768358	1.94566	0.0516957	0.12882	FALSE	NoSigChange
ATAC	CAAACn	Simple_repeat	Simple_repeat	J1.TSA.vs.J1.DMSO	6619.11	0.0861191	0.0544473	1.5817	0.113719	0.213603	FALSE	NoSigChange
ATAC	CAAAGn	Simple_repeat	Simple_repeat	J1.TSA.vs.J1.DMSO	1146	-0.0481967	0.0559713	-0.861097	0.389185	0.502846	FALSE	NoSigChange
ATAC	CAAAn	Simple_repeat	Simple_repeat	J1.TSA.vs.J1.DMSO	50936.2	0.225248	0.0838117	2.68755	0.00719788	0.0360829	TRUE	SigIncrease
ATAC	CAAATn	Simple_repeat	Simple_repeat	J1.TSA.vs.J1.DMSO	333.169	0.287447	0.0985651	2.91632	0.0035419	0.0219568	TRUE	SigIncrease
ATAC	CAACCn	Simple_repeat	Simple_repeat	J1.TSA.vs.J1.DMSO	440.19	0.0392773	0.0886395	0.443113	0.657684	0.739056	FALSE	NoSigChange
ATAC	CAACGn	Simple_repeat	Simple_repeat	J1.TSA.vs.J1.DMSO	13.2758	0.0102967	0.375651	0.0274103	0.978133	0.980673	FALSE	NoSigChange
ATAC	CAACTn	Simple_repeat	Simple_repeat	J1.TSA.vs.J1.DMSO	116.936	0.0763115	0.121431	0.628434	0.52972	0.635499	FALSE	NoSigChange
ATAC	CAAGAn	Simple_repeat	Simple_repeat	J1.TSA.vs.J1.DMSO	437.398	0.525521	0.0935661	5.61658	1.9478e-08	1.73107e-06	TRUE	SigIncrease
ATAC	CAAGCn	Simple_repeat	Simple_repeat	J1.TSA.vs.J1.DMSO	344.724	0.0494676	0.0862521	0.573523	0.566291	0.66698	FALSE	NoSigChange
ATAC	CAAGGn	Simple_repeat	Simple_repeat	J1.TSA.vs.J1.DMSO	651.973	-0.0429118	0.102376	-0.419159	0.6751	0.753691	FALSE	NoSigChange
ATAC	CAAGn	Simple_repeat	Simple_repeat	J1.TSA.vs.J1.DMSO	3402.36	-0.0209882	0.0344588	-0.609081	0.542471	0.646776	FALSE	NoSigChange
ATAC	CAAGTn	Simple_repeat	Simple_repeat	J1.TSA.vs.J1.DMSO	27.0875	-0.334215	0.28346	-1.17905	0.238376	0.352204	FALSE	NoSigChange
ATAC	CAAn	Simple_repeat	Simple_repeat	J1.TSA.vs.J1.DMSO	19373.8	0.216005	0.0892553	2.42008	0.015517	0.0621979	FALSE	NoSigChange
ATAC	CAATAn	Simple_repeat	Simple_repeat	J1.TSA.vs.J1.DMSO	382.532	0.265906	0.147553	1.8021	0.0715298	0.157774	FALSE	NoSigChange
ATAC	CAATCn	Simple_repeat	Simple_repeat	J1.TSA.vs.J1.DMSO	94.7698	0.189671	0.164003	1.15651	0.247474	0.362868	FALSE	NoSigChange
ATAC	CAATGn	Simple_repeat	Simple_repeat	J1.TSA.vs.J1.DMSO	42.9606	0.178445	0.233379	0.764615	0.444501	0.55622	FALSE	NoSigChange
ATAC	CAATn	Simple_repeat	Simple_repeat	J1.TSA.vs.J1.DMSO	3421.54	0.186049	0.0686803	2.70891	0.00675047	0.0343985	TRUE	SigIncrease
ATAC	CAATTn	Simple_repeat	Simple_repeat	J1.TSA.vs.J1.DMSO	62.1363	0.158917	0.231015	0.687909	0.49151	0.602773	FALSE	NoSigChange
ATAC	CACAAn	Simple_repeat	Simple_repeat	J1.TSA.vs.J1.DMSO	622.397	0.130948	0.0642988	2.03656	0.041694	0.114547	FALSE	NoSigChange
ATAC	CACACn	Simple_repeat	Simple_repeat	J1.TSA.vs.J1.DMSO	2170.97	0.0515048	0.0483395	1.06548	0.286658	0.401788	FALSE	NoSigChange
ATAC	CACAGn	Simple_repeat	Simple_repeat	J1.TSA.vs.J1.DMSO	6602.24	0.0802448	0.0672173	1.19381	0.232552	0.347114	FALSE	NoSigChange
ATAC	CACATn	Simple_repeat	Simple_repeat	J1.TSA.vs.J1.DMSO	540.938	0.206135	0.0721417	2.85736	0.00427175	0.024889	TRUE	SigIncrease
ATAC	CACCATn	Simple_repeat	Simple_repeat	J1.TSA.vs.J1.DMSO	3957.02	0.136557	0.077193	1.76904	0.0768879	0.166035	FALSE	NoSigChange
ATAC	CACCCn	Simple_repeat	Simple_repeat	J1.TSA.vs.J1.DMSO	6166.36	-0.0218014	0.0986272	-0.221049	0.825054	0.860732	FALSE	NoSigChange
ATAC	CACCGn	Simple_repeat	Simple_repeat	J1.TSA.vs.J1.DMSO	151.523	-0.46065	0.19536	-2.35796	0.0183757	0.0695394	FALSE	NoSigChange
ATAC	CACCTn	Simple_repeat	Simple_repeat	J1.TSA.vs.J1.DMSO	927.394	-0.18248	0.10379	-1.75817	0.0787186	0.168107	FALSE	NoSigChange
ATAC	CACGAn	Simple_repeat	Simple_repeat	J1.TSA.vs.J1.DMSO	9.20728	-0.0368247	0.408651	-0.090113	0.928197	0.942853	FALSE	NoSigChange
ATAC	CACGCn	Simple_repeat	Simple_repeat	J1.TSA.vs.J1.DMSO	156.517	-0.479957	0.19408	-2.47299	0.0133988	0.0553148	FALSE	NoSigChange
ATAC	CACGn	Simple_repeat	Simple_repeat	J1.TSA.vs.J1.DMSO	6546.75	-0.176275	0.104279	-1.69041	0.0909495	0.184286	FALSE	NoSigChange
ATAC	CACGTn	Simple_repeat	Simple_repeat	J1.TSA.vs.J1.DMSO	17.8014	-0.47897	0.37867	-1.26487	0.205917	0.317935	FALSE	NoSigChange
ATAC	CACTAn	Simple_repeat	Simple_repeat	J1.TSA.vs.J1.DMSO	489.6	0.135803	0.0998667	1.35984	0.173881	0.285305	FALSE	NoSigChange
ATAC	CACTCn	Simple_repeat	Simple_repeat	J1.TSA.vs.J1.DMSO	468.259	0.0411102	0.0815767	0.503945	0.6143	0.706239	FALSE	NoSigChange
ATAC	CACTGn	Simple_repeat	Simple_repeat	J1.TSA.vs.J1.DMSO	1079.05	0.0304114	0.0904461	0.336238	0.736692	0.799896	FALSE	NoSigChange
ATAC	CACTTn	Simple_repeat	Simple_repeat	J1.TSA.vs.J1.DMSO	14.6725	0.556548	0.450154	1.23635	0.216328	0.327462	FALSE	NoSigChange
ATAC	CAGAAn	Simple_repeat	Simple_repeat	J1.TSA.vs.J1.DMSO	958.427	-0.121281	0.0808439	-1.50019	0.133565	0.237861	FALSE	NoSigChange
ATAC	CAGACn	Simple_repeat	Simple_repeat	J1.TSA.vs.J1.DMSO	828.303	0.11802	0.117152	1.00741	0.313738	0.430206	FALSE	NoSigChange
ATAC	CAGAGAn	Simple_repeat	Simple_repeat	J1.TSA.vs.J1.DMSO	27540.1	0.170017	0.0428875	3.96425	7.36257e-05	0.00124921	TRUE	SigIncrease
ATAC	CAGAGn	Simple_repeat	Simple_repeat	J1.TSA.vs.J1.DMSO	4827.46	0.115001	0.105566	1.08938	0.275985	0.392738	FALSE	NoSigChange
ATAC	CAGAn	Simple_repeat	Simple_repeat	J1.TSA.vs.J1.DMSO	24856.1	0.128058	0.056819	2.25378	0.02421	0.0836248	FALSE	NoSigChange
ATAC	CAGATn	Simple_repeat	Simple_repeat	J1.TSA.vs.J1.DMSO	38.9463	0.192996	0.212425	0.908537	0.363594	0.477803	FALSE	NoSigChange
ATAC	CAGCCn	Simple_repeat	Simple_repeat	J1.TSA.vs.J1.DMSO	2581.69	-0.130432	0.109446	-1.19174	0.233362	0.347455	FALSE	NoSigChange
ATAC	CAGCGn	Simple_repeat	Simple_repeat	J1.TSA.vs.J1.DMSO	406.217	-0.518881	0.215516	-2.40762	0.016057	0.0630841	FALSE	NoSigChange
ATAC	CAGCn	Simple_repeat	Simple_repeat	J1.TSA.vs.J1.DMSO	2360.18	-0.256921	0.0851129	-3.01859	0.00253954	0.0172733	TRUE	SigDecrease
ATAC	CAGCTn	Simple_repeat	Simple_repeat	J1.TSA.vs.J1.DMSO	1296.21	-0.247022	0.0838235	-2.94693	0.00320944	0.0208209	TRUE	SigDecrease
ATAC	CAGGAn	Simple_repeat	Simple_repeat	J1.TSA.vs.J1.DMSO	729.479	0.134948	0.0613132	2.20097	0.0277383	0.090151	FALSE	NoSigChange
ATAC	CAGGCn	Simple_repeat	Simple_repeat	J1.TSA.vs.J1.DMSO	692.747	-0.0658335	0.109419	-0.601662	0.547399	0.650706	FALSE	NoSigChange
ATAC	CAGGGn	Simple_repeat	Simple_repeat	J1.TSA.vs.J1.DMSO	1548.72	-0.27801	0.133044	-2.0896	0.0366535	0.106846	FALSE	NoSigChange
ATAC	CAGGn	Simple_repeat	Simple_repeat	J1.TSA.vs.J1.DMSO	13932.5	0.034358	0.127005	0.270526	0.786756	0.836605	FALSE	NoSigChange
ATAC	CAGGTn	Simple_repeat	Simple_repeat	J1.TSA.vs.J1.DMSO	66.6023	0.269632	0.178213	1.51298	0.130285	0.232925	FALSE	NoSigChange
ATAC	CAGn	Simple_repeat	Simple_repeat	J1.TSA.vs.J1.DMSO	17264.6	-0.278946	0.108274	-2.5763	0.00998628	0.0450942	TRUE	SigDecrease
ATAC	CAGTAn	Simple_repeat	Simple_repeat	J1.TSA.vs.J1.DMSO	803.635	0.137147	0.0829431	1.6535	0.0982289	0.195404	FALSE	NoSigChange
ATAC	CAGTCn	Simple_repeat	Simple_repeat	J1.TSA.vs.J1.DMSO	162.13	0.242945	0.114231	2.12679	0.0334375	0.100835	FALSE	NoSigChange
ATAC	CAGTGn	Simple_repeat	Simple_repeat	J1.TSA.vs.J1.DMSO	1272.51	-0.0770878	0.0667774	-1.1544	0.248336	0.363196	FALSE	NoSigChange
ATAC	CAGTn	Simple_repeat	Simple_repeat	J1.TSA.vs.J1.DMSO	1320.3	-0.095627	0.0617842	-1.54776	0.12168	0.221812	FALSE	NoSigChange
ATAC	CAGTTn	Simple_repeat	Simple_repeat	J1.TSA.vs.J1.DMSO	388.229	0.201541	0.0834865	2.41406	0.015776	0.0626174	FALSE	NoSigChange
ATAC	CAn	Simple_repeat	Simple_repeat	J1.TSA.vs.J1.DMSO	530447	0.164456	0.0571697	2.87662	0.00401954	0.023961	TRUE	SigIncrease
ATAC	CATAAn	Simple_repeat	Simple_repeat	J1.TSA.vs.J1.DMSO	242.33	0.267596	0.144349	1.85382	0.063765	0.145715	FALSE	NoSigChange
ATAC	CATACn	Simple_repeat	Simple_repeat	J1.TSA.vs.J1.DMSO	393.899	0.276513	0.0776778	3.55975	0.000371211	0.00428893	TRUE	SigIncrease
ATAC	CATAGn	Simple_repeat	Simple_repeat	J1.TSA.vs.J1.DMSO	267.521	0.256143	0.109387	2.34161	0.0192006	0.0709227	FALSE	NoSigChange
ATAC	CATAn	Simple_repeat	Simple_repeat	J1.TSA.vs.J1.DMSO	28494.9	0.272488	0.119145	2.28703	0.022194	0.0787758	FALSE	NoSigChange
ATAC	CATATAn	Simple_repeat	Simple_repeat	J1.TSA.vs.J1.DMSO	11759.1	0.413872	0.176905	2.33951	0.0193089	0.0711527	FALSE	NoSigChange
ATAC	CATATn	Simple_repeat	Simple_repeat	J1.TSA.vs.J1.DMSO	497.562	0.524729	0.19845	2.64413	0.00819002	0.0399832	TRUE	SigIncrease
ATAC	CATCCn	Simple_repeat	Simple_repeat	J1.TSA.vs.J1.DMSO	574.741	0.049054	0.0696593	0.704198	0.481309	0.592145	FALSE	NoSigChange
ATAC	CATCGn	Simple_repeat	Simple_repeat	J1.TSA.vs.J1.DMSO	42.1722	-0.0629902	0.235123	-0.267903	0.788774	0.837027	FALSE	NoSigChange
ATAC	CATCTn	Simple_repeat	Simple_repeat	J1.TSA.vs.J1.DMSO	121.752	0.110634	0.126915	0.871717	0.383363	0.497824	FALSE	NoSigChange
ATAC	CATGCn	Simple_repeat	Simple_repeat	J1.TSA.vs.J1.DMSO	202.94	0.177577	0.119026	1.49192	0.13572	0.240587	FALSE	NoSigChange
ATAC	CATGn	Simple_repeat	Simple_repeat	J1.TSA.vs.J1.DMSO	3998.74	0.0815356	0.0699309	1.16595	0.243636	0.35792	FALSE	NoSigChange
ATAC	CATGTn	Simple_repeat	Simple_repeat	J1.TSA.vs.J1.DMSO	191.649	0.0263041	0.109688	0.239808	0.810479	0.852439	FALSE	NoSigChange
ATAC	CATn	Simple_repeat	Simple_repeat	J1.TSA.vs.J1.DMSO	6080.03	0.192547	0.0910761	2.11413	0.0345039	0.102561	FALSE	NoSigChange
ATAC	CATTAn	Simple_repeat	Simple_repeat	J1.TSA.vs.J1.DMSO	78.8701	0.23498	0.180852	1.2993	0.193841	0.306965	FALSE	NoSigChange
ATAC	CATTCn	Satellite	Satellite	J1.TSA.vs.J1.DMSO	223.957	-0.0128184	0.0878713	-0.145878	0.884018	0.909343	FALSE	NoSigChange
ATAC	CATTGn	Simple_repeat	Simple_repeat	J1.TSA.vs.J1.DMSO	83.3556	-0.212431	0.184045	-1.15424	0.248403	0.363196	FALSE	NoSigChange
ATAC	CATTTn	Simple_repeat	Simple_repeat	J1.TSA.vs.J1.DMSO	187.268	0.234559	0.158137	1.48326	0.138005	0.24361	FALSE	NoSigChange
ATAC	CCAAn	Simple_repeat	Simple_repeat	J1.TSA.vs.J1.DMSO	6768.48	0.100191	0.0645752	1.55154	0.120772	0.220735	FALSE	NoSigChange
ATAC	CCAn	Simple_repeat	Simple_repeat	J1.TSA.vs.J1.DMSO	16972.7	0.0199587	0.0437352	0.456353	0.648136	0.73313	FALSE	NoSigChange
ATAC	CCCAn	Simple_repeat	Simple_repeat	J1.TSA.vs.J1.DMSO	4337.1	0.0724795	0.0538877	1.34501	0.178621	0.289799	FALSE	NoSigChange
ATAC	CCCCAAn	Simple_repeat	Simple_repeat	J1.TSA.vs.J1.DMSO	660.33	-0.335101	0.118118	-2.83701	0.00455381	0.0259474	TRUE	SigDecrease
ATAC	CCCCAGn	Simple_repeat	Simple_repeat	J1.TSA.vs.J1.DMSO	8345.95	-0.293044	0.153702	-1.90657	0.0565758	0.136703	FALSE	NoSigChange
ATAC	CCCCCAn	Simple_repeat	Simple_repeat	J1.TSA.vs.J1.DMSO	9661.88	-0.0832122	0.104061	-0.799651	0.423913	0.536493	FALSE	NoSigChange
ATAC	CCCCCGn	Simple_repeat	Simple_repeat	J1.TSA.vs.J1.DMSO	2971.25	-0.294918	0.184675	-1.59695	0.110277	0.210988	FALSE	NoSigChange
ATAC	CCCCCTn	Simple_repeat	Simple_repeat	J1.TSA.vs.J1.DMSO	4595.23	-0.0924653	0.0837232	-1.10442	0.269412	0.38516	FALSE	NoSigChange
ATAC	CCCCGn	Simple_repeat	Simple_repeat	J1.TSA.vs.J1.DMSO	39702.9	-0.407485	0.184434	-2.20939	0.0271478	0.0888054	FALSE	NoSigChange
ATAC	CCCGAAn	Simple_repeat	Simple_repeat	J1.TSA.vs.J1.DMSO	224.699	-0.487278	0.238253	-2.04521	0.0408341	0.112385	FALSE	NoSigChange
ATAC	CCCGAn	Simple_repeat	Simple_repeat	J1.TSA.vs.J1.DMSO	186.976	-0.292718	0.203094	-1.44129	0.149503	0.255628	FALSE	NoSigChange
ATAC	CCCGGn	Simple_repeat	Simple_repeat	J1.TSA.vs.J1.DMSO	1313.51	-0.470705	0.220542	-2.13431	0.0328173	0.0999407	FALSE	NoSigChange
ATAC	CCCGn	Simple_repeat	Simple_repeat	J1.TSA.vs.J1.DMSO	4481.17	-0.411402	0.19666	-2.09194	0.0364436	0.10657	FALSE	NoSigChange
ATAC	CCCTAAn	Simple_repeat	Simple_repeat	J1.TSA.vs.J1.DMSO	8346.14	0.398803	0.0814161	4.89833	9.6655e-07	4.6636e-05	TRUE	SigIncrease
ATAC	CCCTAGn	Simple_repeat	Simple_repeat	J1.TSA.vs.J1.DMSO	457.856	0.0414278	0.0951226	0.43552	0.663185	0.744079	FALSE	NoSigChange
ATAC	CCCTAn	Simple_repeat	Simple_repeat	J1.TSA.vs.J1.DMSO	50.5441	0.187696	0.188336	0.996604	0.318957	0.436586	FALSE	NoSigChange
ATAC	CCCTGn	Simple_repeat	Simple_repeat	J1.TSA.vs.J1.DMSO	1736.26	-0.232445	0.121624	-1.91117	0.0559828	0.135695	FALSE	NoSigChange
ATAC	CCGAAn	Simple_repeat	Simple_repeat	J1.TSA.vs.J1.DMSO	83.9884	-0.202721	0.217327	-0.932793	0.350927	0.466292	FALSE	NoSigChange
ATAC	CCGAGn	Simple_repeat	Simple_repeat	J1.TSA.vs.J1.DMSO	1210.93	-0.524944	0.191131	-2.74652	0.00602312	0.0322322	TRUE	SigDecrease
ATAC	CCGCGn	Simple_repeat	Simple_repeat	J1.TSA.vs.J1.DMSO	6586.92	-0.448019	0.203693	-2.19948	0.0278437	0.090151	FALSE	NoSigChange
ATAC	CCGGAn	Simple_repeat	Simple_repeat	J1.TSA.vs.J1.DMSO	95.0017	-0.368458	0.254874	-1.44565	0.148276	0.254376	FALSE	NoSigChange
ATAC	CCGGGn	Simple_repeat	Simple_repeat	J1.TSA.vs.J1.DMSO	1607.57	-0.451705	0.230782	-1.95728	0.0503141	0.127389	FALSE	NoSigChange
ATAC	CCGGn	Simple_repeat	Simple_repeat	J1.TSA.vs.J1.DMSO	298.532	-0.360143	0.22904	-1.5724	0.115857	0.216304	FALSE	NoSigChange
ATAC	CCGn	Simple_repeat	Simple_repeat	J1.TSA.vs.J1.DMSO	54062.7	-0.447489	0.205667	-2.1758	0.0295705	0.0933677	FALSE	NoSigChange
ATAC	CCGTAn	Simple_repeat	Simple_repeat	J1.TSA.vs.J1.DMSO	11.9543	0.549833	0.417719	1.31628	0.188081	0.301555	FALSE	NoSigChange
ATAC	CCTAAn	Simple_repeat	Simple_repeat	J1.TSA.vs.J1.DMSO	79.5108	0.268954	0.137788	1.95194	0.0509457	0.128111	FALSE	NoSigChange
ATAC	CCTAGn	Simple_repeat	Simple_repeat	J1.TSA.vs.J1.DMSO	226.018	0.130858	0.133571	0.979684	0.327242	0.445557	FALSE	NoSigChange
ATAC	CCTAn	Simple_repeat	Simple_repeat	J1.TSA.vs.J1.DMSO	1690.23	0.111501	0.0849513	1.31253	0.189341	0.302631	FALSE	NoSigChange
ATAC	CCTATn	Simple_repeat	Simple_repeat	J1.TSA.vs.J1.DMSO	159.378	0.406392	0.120398	3.37541	0.00073707	0.00710602	TRUE	SigIncrease
ATAC	CCTCGn	Simple_repeat	Simple_repeat	J1.TSA.vs.J1.DMSO	570.898	-0.209619	0.167354	-1.25254	0.210372	0.322813	FALSE	NoSigChange
ATAC	CCTGn	Simple_repeat	Simple_repeat	J1.TSA.vs.J1.DMSO	14600.8	-0.000938015	0.129361	-0.00725117	0.994214	0.994859	FALSE	NoSigChange
ATAC	CCTTGn	Simple_repeat	Simple_repeat	J1.TSA.vs.J1.DMSO	333.177	0.224875	0.103431	2.17415	0.0296938	0.0934444	FALSE	NoSigChange
ATAC	CENSAT_MC	Satellite	centr	J1.TSA.vs.J1.DMSO	32.1143	0.125567	0.240998	0.521028	0.602347	0.695605	FALSE	NoSigChange
ATAC	CGAAAn	Simple_repeat	Simple_repeat	J1.TSA.vs.J1.DMSO	391.745	-0.00875661	0.128348	-0.0682258	0.945606	0.956333	FALSE	NoSigChange
ATAC	CGAAGn	Simple_repeat	Simple_repeat	J1.TSA.vs.J1.DMSO	21.9552	-0.758982	0.301047	-2.52114	0.0116975	0.0501692	FALSE	NoSigChange
ATAC	CGAAn	Simple_repeat	Simple_repeat	J1.TSA.vs.J1.DMSO	172.563	-0.359209	0.139256	-2.57948	0.0098948	0.0450666	TRUE	SigDecrease
ATAC	CGAGAn	Simple_repeat	Simple_repeat	J1.TSA.vs.J1.DMSO	37.7179	0.32612	0.233385	1.39735	0.162308	0.271821	FALSE	NoSigChange
ATAC	CGAGGn	Simple_repeat	Simple_repeat	J1.TSA.vs.J1.DMSO	739.437	-0.291457	0.16006	-1.82092	0.0686187	0.152662	FALSE	NoSigChange
ATAC	CGAGn	Simple_repeat	Simple_repeat	J1.TSA.vs.J1.DMSO	2641.08	-0.469182	0.207274	-2.26358	0.0235998	0.0820677	FALSE	NoSigChange
ATAC	CGAGTn	Simple_repeat	Simple_repeat	J1.TSA.vs.J1.DMSO	1.32382	1.28786	1.36481	0.943615	0.345366	0.461285	FALSE	NoSigChange
ATAC	CGAn	Simple_repeat	Simple_repeat	J1.TSA.vs.J1.DMSO	517.579	-0.192863	0.10337	-1.86574	0.0620774	0.143915	FALSE	NoSigChange
ATAC	CGATGn	Simple_repeat	Simple_repeat	J1.TSA.vs.J1.DMSO	17.5853	0.490629	0.310943	1.57788	0.114594	0.214724	FALSE	NoSigChange
ATAC	CGATn	Simple_repeat	Simple_repeat	J1.TSA.vs.J1.DMSO	46.5877	-0.0201334	0.2223	-0.090569	0.927835	0.942853	FALSE	NoSigChange
ATAC	CGCGGn	Simple_repeat	Simple_repeat	J1.TSA.vs.J1.DMSO	6394.29	-0.400791	0.2041	-1.9637	0.0495648	0.126702	FALSE	NoSigChange
ATAC	CGCTGn	Simple_repeat	Simple_repeat	J1.TSA.vs.J1.DMSO	232.068	-0.443073	0.193911	-2.28492	0.0223173	0.0790318	FALSE	NoSigChange
ATAC	CGGAAn	Simple_repeat	Simple_repeat	J1.TSA.vs.J1.DMSO	23.0342	0.213178	0.292434	0.728977	0.466015	0.578399	FALSE	NoSigChange
ATAC	CGGAGn	Simple_repeat	Simple_repeat	J1.TSA.vs.J1.DMSO	878.502	-0.481688	0.220627	-2.18327	0.0290162	0.0921831	FALSE	NoSigChange
ATAC	CGGAn	Simple_repeat	Simple_repeat	J1.TSA.vs.J1.DMSO	542.562	-0.108218	0.133729	-0.809231	0.418382	0.530363	FALSE	NoSigChange
ATAC	CGGGAn	Simple_repeat	Simple_repeat	J1.TSA.vs.J1.DMSO	104.894	-0.0599962	0.172999	-0.3468	0.728742	0.793496	FALSE	NoSigChange
ATAC	CGGGGGn	Simple_repeat	Simple_repeat	J1.TSA.vs.J1.DMSO	3368.83	-0.405526	0.169319	-2.39504	0.0166186	0.0649261	FALSE	NoSigChange
ATAC	CGGGGn	Simple_repeat	Simple_repeat	J1.TSA.vs.J1.DMSO	36846.4	-0.407375	0.185758	-2.19304	0.0283047	0.0908576	FALSE	NoSigChange
ATAC	CGGGn	Simple_repeat	Simple_repeat	J1.TSA.vs.J1.DMSO	4797.44	-0.450168	0.202991	-2.21767	0.0265773	0.0873092	FALSE	NoSigChange
ATAC	CGGn	Simple_repeat	Simple_repeat	J1.TSA.vs.J1.DMSO	49074.5	-0.471186	0.205276	-2.29538	0.0217116	0.0775988	FALSE	NoSigChange
ATAC	CGGTGn	Simple_repeat	Simple_repeat	J1.TSA.vs.J1.DMSO	271.32	-0.42471	0.147703	-2.87542	0.00403488	0.023961	TRUE	SigDecrease
ATAC	CGGTn	Simple_repeat	Simple_repeat	J1.TSA.vs.J1.DMSO	119.344	-0.378595	0.139325	-2.71736	0.00658056	0.0340953	TRUE	SigDecrease
ATAC	CGn	Simple_repeat	Simple_repeat	J1.TSA.vs.J1.DMSO	6134.85	-0.24565	0.139577	-1.75995	0.0784156	0.168078	FALSE	NoSigChange
ATAC	CGTGn	Simple_repeat	Simple_repeat	J1.TSA.vs.J1.DMSO	7250.05	-0.192956	0.107294	-1.79838	0.0721166	0.158165	FALSE	NoSigChange
ATAC	CGTTGn	Simple_repeat	Simple_repeat	J1.TSA.vs.J1.DMSO	68.591	-0.217941	0.261944	-0.832017	0.405399	0.518589	FALSE	NoSigChange
ATAC	Chap1_Mam	DNA	hAT-Charlie	J1.TSA.vs.J1.DMSO	788.654	0.14929	0.0909703	1.64108	0.10078	0.198728	FALSE	NoSigChange
ATAC	Charlie1	DNA	hAT-Charlie	J1.TSA.vs.J1.DMSO	6174.63	0.123965	0.0932581	1.32926	0.183761	0.296728	FALSE	NoSigChange
ATAC	Charlie10	DNA	hAT-Charlie	J1.TSA.vs.J1.DMSO	1868.57	0.15258	0.0959844	1.58964	0.111917	0.212043	FALSE	NoSigChange
ATAC	Charlie10a	DNA	hAT-Charlie	J1.TSA.vs.J1.DMSO	325.324	0.168213	0.078162	2.15211	0.031389	0.0971236	FALSE	NoSigChange
ATAC	Charlie10b	DNA	hAT-Charlie	J1.TSA.vs.J1.DMSO	273.953	0.0773003	0.11144	0.693646	0.487904	0.599303	FALSE	NoSigChange
ATAC	Charlie11	DNA	hAT-Charlie	J1.TSA.vs.J1.DMSO	324.468	0.15245	0.121168	1.25817	0.208329	0.321017	FALSE	NoSigChange
ATAC	Charlie12	DNA	hAT-Charlie	J1.TSA.vs.J1.DMSO	4729.5	0.12937	0.07954	1.62647	0.103849	0.203561	FALSE	NoSigChange
ATAC	Charlie13a	DNA	hAT-Charlie	J1.TSA.vs.J1.DMSO	1487.43	-0.0395202	0.046954	-0.841678	0.399968	0.51249	FALSE	NoSigChange
ATAC	Charlie13b	DNA	hAT-Charlie	J1.TSA.vs.J1.DMSO	795.969	0.0245206	0.0766175	0.32004	0.748938	0.809776	FALSE	NoSigChange
ATAC	Charlie14a	DNA	hAT-Charlie	J1.TSA.vs.J1.DMSO	280.268	0.252612	0.109457	2.30787	0.0210062	0.0755454	FALSE	NoSigChange
ATAC	Charlie15a	DNA	hAT-Charlie	J1.TSA.vs.J1.DMSO	1118.42	0.0326644	0.070306	0.464603	0.642216	0.728033	FALSE	NoSigChange
ATAC	Charlie15b	DNA	hAT-Charlie	J1.TSA.vs.J1.DMSO	1352.98	0.0946734	0.0942631	1.00435	0.315209	0.431839	FALSE	NoSigChange
ATAC	Charlie16a	DNA	hAT-Charlie	J1.TSA.vs.J1.DMSO	1079.95	0.144003	0.0732375	1.96625	0.0492694	0.126156	FALSE	NoSigChange
ATAC	Charlie17	DNA	hAT-Charlie	J1.TSA.vs.J1.DMSO	668.001	0.155092	0.131846	1.17631	0.239469	0.352806	FALSE	NoSigChange
ATAC	Charlie17a	DNA	hAT-Charlie	J1.TSA.vs.J1.DMSO	354.641	-0.0420523	0.0830381	-0.506421	0.612561	0.70529	FALSE	NoSigChange
ATAC	Charlie17b	DNA	hAT-Charlie	J1.TSA.vs.J1.DMSO	1065.11	-0.0195069	0.0532852	-0.366085	0.714301	0.782185	FALSE	NoSigChange
ATAC	Charlie18a	DNA	hAT-Charlie	J1.TSA.vs.J1.DMSO	986.263	0.154736	0.0987419	1.56707	0.117098	0.21783	FALSE	NoSigChange
ATAC	Charlie19a	DNA	hAT-Charlie	J1.TSA.vs.J1.DMSO	1354.7	0.00555068	0.077586	0.0715423	0.942966	0.954715	FALSE	NoSigChange
ATAC	Charlie1a	DNA	hAT-Charlie	J1.TSA.vs.J1.DMSO	16319.7	0.111844	0.0975573	1.14645	0.25161	0.366842	FALSE	NoSigChange
ATAC	Charlie1b	DNA	hAT-Charlie	J1.TSA.vs.J1.DMSO	4897.21	0.120852	0.0830229	1.45565	0.14549	0.25135	FALSE	NoSigChange
ATAC	Charlie1b_Mars	DNA	hAT-Charlie	J1.TSA.vs.J1.DMSO	13.7932	0.695137	0.439225	1.58264	0.113502	0.213603	FALSE	NoSigChange
ATAC	Charlie20a	DNA	hAT-Charlie	J1.TSA.vs.J1.DMSO	977.15	0.1186	0.0930005	1.27527	0.202215	0.315692	FALSE	NoSigChange
ATAC	Charlie21a	DNA	hAT-Charlie	J1.TSA.vs.J1.DMSO	766.724	0.280995	0.16078	1.74769	0.0805171	0.170835	FALSE	NoSigChange
ATAC	Charlie22a	DNA	hAT-Charlie	J1.TSA.vs.J1.DMSO	774.888	0.149679	0.0860229	1.73999	0.0818603	0.171993	FALSE	NoSigChange
ATAC	Charlie23a	DNA	hAT-Charlie	J1.TSA.vs.J1.DMSO	718.87	0.215883	0.0867341	2.48902	0.0128096	0.0535185	FALSE	NoSigChange
ATAC	Charlie24	DNA	hAT-Charlie	J1.TSA.vs.J1.DMSO	2424.51	0.041525	0.0731552	0.567629	0.570287	0.66909	FALSE	NoSigChange
ATAC	Charlie25	DNA	hAT-Charlie	J1.TSA.vs.J1.DMSO	1930.72	0.178475	0.0929543	1.92002	0.0548549	0.134013	FALSE	NoSigChange
ATAC	Charlie26a	DNA	hAT-Charlie	J1.TSA.vs.J1.DMSO	420.164	0.0224628	0.123547	0.181816	0.855727	0.887832	FALSE	NoSigChange
ATAC	Charlie29a	DNA	hAT-Charlie	J1.TSA.vs.J1.DMSO	1609.08	0.145801	0.113298	1.28688	0.198135	0.311373	FALSE	NoSigChange
ATAC	Charlie2a	DNA	hAT-Charlie	J1.TSA.vs.J1.DMSO	2569.61	0.143658	0.115843	1.24012	0.214933	0.325669	FALSE	NoSigChange
ATAC	Charlie2b	DNA	hAT-Charlie	J1.TSA.vs.J1.DMSO	3879.2	0.209804	0.122823	1.70818	0.0876027	0.179563	FALSE	NoSigChange
ATAC	Charlie4	DNA	hAT-Charlie	J1.TSA.vs.J1.DMSO	630.3	0.225959	0.112646	2.00591	0.0448655	0.11903	FALSE	NoSigChange
ATAC	Charlie4a	DNA	hAT-Charlie	J1.TSA.vs.J1.DMSO	5645.17	0.125768	0.0873357	1.44006	0.149851	0.255923	FALSE	NoSigChange
ATAC	Charlie4z	DNA	hAT-Charlie	J1.TSA.vs.J1.DMSO	1807.84	0.025695	0.0545327	0.471185	0.637509	0.725301	FALSE	NoSigChange
ATAC	Charlie5	DNA	hAT-Charlie	J1.TSA.vs.J1.DMSO	6077.08	0.175229	0.119923	1.46118	0.143965	0.249495	FALSE	NoSigChange
ATAC	Charlie6	DNA	hAT-Charlie	J1.TSA.vs.J1.DMSO	951.527	0.134927	0.0991281	1.36114	0.173471	0.284935	FALSE	NoSigChange
ATAC	Charlie7	DNA	hAT-Charlie	J1.TSA.vs.J1.DMSO	4292.67	0.185349	0.127643	1.45209	0.146476	0.251848	FALSE	NoSigChange
ATAC	Charlie7a	DNA	hAT-Charlie	J1.TSA.vs.J1.DMSO	367.355	0.0918222	0.15528	0.591332	0.554298	0.656316	FALSE	NoSigChange
ATAC	Charlie8	DNA	hAT-Charlie	J1.TSA.vs.J1.DMSO	4586.7	-0.037923	0.0489633	-0.774517	0.438625	0.552396	FALSE	NoSigChange
ATAC	Charlie9	DNA	hAT-Charlie	J1.TSA.vs.J1.DMSO	924.922	0.19429	0.0984165	1.97417	0.048363	0.124355	FALSE	NoSigChange
ATAC	Cheshire	DNA	hAT-Charlie	J1.TSA.vs.J1.DMSO	5650.52	0.109772	0.0807657	1.35915	0.1741	0.285361	FALSE	NoSigChange
ATAC	Cheshire_Mars	DNA	hAT-Charlie	J1.TSA.vs.J1.DMSO	11.9377	-0.336614	0.405427	-0.830271	0.406386	0.51899	FALSE	NoSigChange
ATAC	Cheshire_Mars_	DNA	hAT-Charlie	J1.TSA.vs.J1.DMSO	55.1764	0.0515388	0.175788	0.293188	0.769379	0.823801	FALSE	NoSigChange
ATAC	Cn	Simple_repeat	Simple_repeat	J1.TSA.vs.J1.DMSO	4100.1	-0.119859	0.108376	-1.10596	0.268744	0.38456	FALSE	NoSigChange
ATAC	CR1_Mam	LINE	CR1	J1.TSA.vs.J1.DMSO	1492.02	-0.0620689	0.047914	-1.29542	0.195175	0.308444	FALSE	NoSigChange
ATAC	CT-rich	Low_complexity	Low_complexity	J1.TSA.vs.J1.DMSO	104384	0.0263988	0.0357577	0.738269	0.460351	0.573035	FALSE	NoSigChange
ATAC	CTAAAn	Simple_repeat	Simple_repeat	J1.TSA.vs.J1.DMSO	267.117	0.398259	0.131688	3.02427	0.00249232	0.0170272	TRUE	SigIncrease
ATAC	CTAAGn	Simple_repeat	Simple_repeat	J1.TSA.vs.J1.DMSO	31.8023	0.281648	0.268257	1.04992	0.293754	0.408609	FALSE	NoSigChange
ATAC	CTAAn	Simple_repeat	Simple_repeat	J1.TSA.vs.J1.DMSO	1152.91	0.17479	0.0954569	1.83108	0.0670882	0.151218	FALSE	NoSigChange
ATAC	CTAATn	Simple_repeat	Simple_repeat	J1.TSA.vs.J1.DMSO	205.044	0.183387	0.142875	1.28355	0.199299	0.312404	FALSE	NoSigChange
ATAC	CTACTn	Simple_repeat	Simple_repeat	J1.TSA.vs.J1.DMSO	134.768	0.108409	0.152723	0.70984	0.477803	0.589663	FALSE	NoSigChange
ATAC	CTAGGGn	Simple_repeat	Simple_repeat	J1.TSA.vs.J1.DMSO	671.011	0.184754	0.0705183	2.61995	0.00879431	0.0412718	TRUE	SigIncrease
ATAC	CTAGGn	Simple_repeat	Simple_repeat	J1.TSA.vs.J1.DMSO	284.798	0.106609	0.144478	0.737892	0.46058	0.573035	FALSE	NoSigChange
ATAC	CTAGn	Simple_repeat	Simple_repeat	J1.TSA.vs.J1.DMSO	154.671	-0.0809524	0.106293	-0.761597	0.446301	0.557966	FALSE	NoSigChange
ATAC	CTAGTn	Simple_repeat	Simple_repeat	J1.TSA.vs.J1.DMSO	74.8439	0.111245	0.162834	0.683182	0.494492	0.604988	FALSE	NoSigChange
ATAC	CTAn	Simple_repeat	Simple_repeat	J1.TSA.vs.J1.DMSO	2389.87	0.239522	0.120401	1.98937	0.0466608	0.122316	FALSE	NoSigChange
ATAC	CTATAn	Simple_repeat	Simple_repeat	J1.TSA.vs.J1.DMSO	721.064	0.361696	0.174601	2.07156	0.0383068	0.10793	FALSE	NoSigChange
ATAC	CTATGn	Simple_repeat	Simple_repeat	J1.TSA.vs.J1.DMSO	374.505	0.0787752	0.0816003	0.965378	0.334355	0.451658	FALSE	NoSigChange
ATAC	CTATTn	Simple_repeat	Simple_repeat	J1.TSA.vs.J1.DMSO	354.334	0.389501	0.199619	1.95122	0.0510308	0.128116	FALSE	NoSigChange
ATAC	CTCAn	Simple_repeat	Simple_repeat	J1.TSA.vs.J1.DMSO	2756.38	0.0126001	0.0523888	0.240511	0.809934	0.852439	FALSE	NoSigChange
ATAC	CTCCGn	Simple_repeat	Simple_repeat	J1.TSA.vs.J1.DMSO	1389.93	-0.536122	0.197421	-2.71562	0.00661517	0.03416	TRUE	SigDecrease
ATAC	CTCGGn	Simple_repeat	Simple_repeat	J1.TSA.vs.J1.DMSO	2431.64	-0.56602	0.192869	-2.93473	0.00333835	0.0214767	TRUE	SigDecrease
ATAC	CTCGn	Simple_repeat	Simple_repeat	J1.TSA.vs.J1.DMSO	6257.2	-0.588257	0.186127	-3.16052	0.00157489	0.0125991	TRUE	SigDecrease
ATAC	CTCTGn	Simple_repeat	Simple_repeat	J1.TSA.vs.J1.DMSO	4653.42	0.184187	0.104619	1.76055	0.078314	0.168078	FALSE	NoSigChange
ATAC	CTGGGGn	Simple_repeat	Simple_repeat	J1.TSA.vs.J1.DMSO	7142.35	-0.17982	0.152848	-1.17646	0.239412	0.352806	FALSE	NoSigChange
ATAC	CTGn	Simple_repeat	Simple_repeat	J1.TSA.vs.J1.DMSO	17939.9	-0.288972	0.114805	-2.51706	0.0118338	0.0506135	FALSE	NoSigChange
ATAC	CTGTGn	Simple_repeat	Simple_repeat	J1.TSA.vs.J1.DMSO	9723.73	0.108148	0.0763375	1.41671	0.156568	0.263622	FALSE	NoSigChange
ATAC	CTTAAn	Simple_repeat	Simple_repeat	J1.TSA.vs.J1.DMSO	12.8249	0.645943	0.399056	1.61868	0.105516	0.204413	FALSE	NoSigChange
ATAC	CTTAGn	Simple_repeat	Simple_repeat	J1.TSA.vs.J1.DMSO	64.9637	0.112669	0.170898	0.659277	0.509718	0.617743	FALSE	NoSigChange
ATAC	CTTAn	Simple_repeat	Simple_repeat	J1.TSA.vs.J1.DMSO	776.122	0.396467	0.130027	3.04911	0.00229523	0.0160354	TRUE	SigIncrease
ATAC	CTTATn	Simple_repeat	Simple_repeat	J1.TSA.vs.J1.DMSO	76.5263	0.184748	0.176506	1.0467	0.295239	0.409201	FALSE	NoSigChange
ATAC	CTTCGn	Simple_repeat	Simple_repeat	J1.TSA.vs.J1.DMSO	8.48645	-0.67138	0.458499	-1.4643	0.143112	0.248554	FALSE	NoSigChange
ATAC	CTTGn	Simple_repeat	Simple_repeat	J1.TSA.vs.J1.DMSO	3018.57	0.0688535	0.0522078	1.31884	0.187224	0.300805	FALSE	NoSigChange
ATAC	CTTTAn	Simple_repeat	Simple_repeat	J1.TSA.vs.J1.DMSO	17.1908	0.100823	0.358398	0.281315	0.778469	0.83238	FALSE	NoSigChange
ATAC	CTTTGn	Simple_repeat	Simple_repeat	J1.TSA.vs.J1.DMSO	1062.64	0.0165887	0.0613183	0.270535	0.786749	0.836605	FALSE	NoSigChange
ATAC	CYRA11_Mm	Unknown	Y-chromosome	J1.TSA.vs.J1.DMSO	9267.23	0.296598	0.0680572	4.35808	1.31211e-05	0.000353652	TRUE	SigIncrease
ATAC	DNA1_Mam	DNA	TcMar	J1.TSA.vs.J1.DMSO	184.721	0.130906	0.102712	1.2745	0.202486	0.315796	FALSE	NoSigChange
ATAC	ERV3-16A3_I-int	LTR	ERVL	J1.TSA.vs.J1.DMSO	7162.41	0.118887	0.0738203	1.61049	0.107291	0.206297	FALSE	NoSigChange
ATAC	ERV3-16A3_LTR	LTR	ERVL	J1.TSA.vs.J1.DMSO	2359.93	0.0334177	0.0461317	0.724397	0.468822	0.580482	FALSE	NoSigChange
ATAC	ERVB2_1-I_MM-int	LTR	ERVK	J1.TSA.vs.J1.DMSO	913.455	0.269084	0.113923	2.36198	0.0181775	0.0690643	FALSE	NoSigChange
ATAC	ERVB2_1A-I_MM-int	LTR	ERVK	J1.TSA.vs.J1.DMSO	3914.39	0.0531485	0.0692426	0.76757	0.442743	0.555317	FALSE	NoSigChange
ATAC	ERVB3_1-I_MM-int	LTR	ERVK	J1.TSA.vs.J1.DMSO	1968.09	0.236476	0.0898591	2.63163	0.00849753	0.0406613	TRUE	SigIncrease
ATAC	ERVB3_1-LTR_MM	LTR	ERVK	J1.TSA.vs.J1.DMSO	2578.83	-0.257452	0.0969057	-2.65673	0.00789032	0.0388445	TRUE	SigDecrease
ATAC	ERVB4_1-I_MM-int	LTR	ERVK	J1.TSA.vs.J1.DMSO	8887.65	0.300426	0.0547973	5.48249	4.19382e-08	3.23763e-06	TRUE	SigIncrease
ATAC	ERVB4_1-LTR_MM	LTR	ERVK	J1.TSA.vs.J1.DMSO	97.6821	0.0358152	0.156455	0.228917	0.818934	0.857386	FALSE	NoSigChange
ATAC	ERVB4_1B-I_MM-int	LTR	ERVK	J1.TSA.vs.J1.DMSO	16880.6	0.191672	0.0820473	2.33612	0.019485	0.0712912	FALSE	NoSigChange
ATAC	ERVB4_1B-LTR_MM	LTR	ERVK	J1.TSA.vs.J1.DMSO	10312.7	0.0943461	0.0540816	1.74451	0.0810695	0.17127	FALSE	NoSigChange
ATAC	ERVB4_1C-LTR_Mm	LTR	ERVK	J1.TSA.vs.J1.DMSO	12028	-0.146262	0.0650788	-2.24747	0.0246101	0.0847334	FALSE	NoSigChange
ATAC	ERVB4_2-I_MM-int	LTR	ERVK	J1.TSA.vs.J1.DMSO	12499.5	0.194506	0.0630725	3.08386	0.00204335	0.0148818	TRUE	SigIncrease
ATAC	ERVB4_2-LTR_MM	LTR	ERVK	J1.TSA.vs.J1.DMSO	2245.86	0.128722	0.079515	1.61884	0.105482	0.204413	FALSE	NoSigChange
ATAC	ERVB4_3-I_MM-int	LTR	ERVK	J1.TSA.vs.J1.DMSO	4079.04	0.390864	0.0696672	5.61044	2.01808e-08	1.73107e-06	TRUE	SigIncrease
ATAC	ERVB4_3-LTR_MM	LTR	ERVK	J1.TSA.vs.J1.DMSO	1303.59	0.41688	0.126235	3.30242	0.00095856	0.00875749	TRUE	SigIncrease
ATAC	ERVB5_1-I_MM-int	LTR	ERVK	J1.TSA.vs.J1.DMSO	5490.81	0.270851	0.0611915	4.42628	9.58706e-06	0.000290244	TRUE	SigIncrease
ATAC	ERVB5_1-LTR_MM	LTR	ERVK	J1.TSA.vs.J1.DMSO	1769.84	0.238854	0.0718973	3.32216	0.000893249	0.00829243	TRUE	SigIncrease
ATAC	ERVB5_2-LTR_MM	LTR	ERVK	J1.TSA.vs.J1.DMSO	3869.95	0.268018	0.051656	5.18852	2.11974e-07	1.42299e-05	TRUE	SigIncrease
ATAC	ERVB7_1-LTR_MM	LTR	ERVK	J1.TSA.vs.J1.DMSO	29921.9	-0.255714	0.139058	-1.83891	0.0659286	0.148821	FALSE	NoSigChange
ATAC	ERVB7_2-LTR_MM	LTR	ERVK	J1.TSA.vs.J1.DMSO	12119.7	-0.0314601	0.122897	-0.255988	0.79796	0.844449	FALSE	NoSigChange
ATAC	ERVB7_2B-LTR_MM	LTR	ERVK	J1.TSA.vs.J1.DMSO	15660	-0.0199225	0.119427	-0.166817	0.867514	0.895349	FALSE	NoSigChange
ATAC	ERVB7_3-LTR_MM	LTR	ERVK	J1.TSA.vs.J1.DMSO	10034.6	-0.114411	0.0958242	-1.19397	0.232491	0.347114	FALSE	NoSigChange
ATAC	ERVB7_4-LTR_MM	LTR	ERVK	J1.TSA.vs.J1.DMSO	5647.1	0.154773	0.0890654	1.73774	0.0822565	0.172092	FALSE	NoSigChange
ATAC	ERVL-B4-int	LTR	ERVL	J1.TSA.vs.J1.DMSO	12318.9	0.12451	0.0712499	1.74751	0.0805493	0.170835	FALSE	NoSigChange
ATAC	ERVL-E-int	LTR	ERVL	J1.TSA.vs.J1.DMSO	8143.12	0.100714	0.0625713	1.60959	0.107487	0.206418	FALSE	NoSigChange
ATAC	ERVL-int	LTR	ERVL	J1.TSA.vs.J1.DMSO	6118.91	0.194335	0.0849043	2.28887	0.022087	0.0787583	FALSE	NoSigChange
ATAC	ETnERV-int	LTR	ERVK	J1.TSA.vs.J1.DMSO	42933.5	-0.243552	0.0831266	-2.92989	0.00339084	0.0217239	TRUE	SigDecrease
ATAC	ETnERV2-int	LTR	ERVK	J1.TSA.vs.J1.DMSO	29852.1	0.0422987	0.0751914	0.562547	0.573744	0.671615	FALSE	NoSigChange
ATAC	ETnERV3-int	LTR	ERVK	J1.TSA.vs.J1.DMSO	12381.4	0.33859	0.110023	3.07746	0.00208773	0.0150107	TRUE	SigIncrease
ATAC	Eulor1	DNA	DNA	J1.TSA.vs.J1.DMSO	175.253	0.316847	0.191682	1.65298	0.0983347	0.195404	FALSE	NoSigChange
ATAC	Eulor10	DNA?	DNA?	J1.TSA.vs.J1.DMSO	127.4	-0.209458	0.137951	-1.51835	0.128926	0.231466	FALSE	NoSigChange
ATAC	Eulor11	DNA	DNA	J1.TSA.vs.J1.DMSO	329.241	0.169373	0.112021	1.51198	0.130539	0.233008	FALSE	NoSigChange
ATAC	Eulor12	DNA?	DNA?	J1.TSA.vs.J1.DMSO	153.806	0.0759273	0.114867	0.661003	0.508611	0.61737	FALSE	NoSigChange
ATAC	Eulor2A	DNA?	DNA?	J1.TSA.vs.J1.DMSO	206.983	-0.0601539	0.0969173	-0.620672	0.534815	0.639177	FALSE	NoSigChange
ATAC	Eulor2B	DNA?	DNA?	J1.TSA.vs.J1.DMSO	230.385	-0.188445	0.113748	-1.65669	0.0975814	0.194407	FALSE	NoSigChange
ATAC	Eulor2C	DNA?	DNA?	J1.TSA.vs.J1.DMSO	98.8422	0.0845339	0.153344	0.551268	0.58145	0.675515	FALSE	NoSigChange
ATAC	Eulor3	DNA?	DNA?	J1.TSA.vs.J1.DMSO	132.553	0.163053	0.167115	0.975691	0.329218	0.447458	FALSE	NoSigChange
ATAC	Eulor4	Unknown	Unknown	J1.TSA.vs.J1.DMSO	102.603	0.45322	0.203534	2.22675	0.0259639	0.0867711	FALSE	NoSigChange
ATAC	Eulor5A	DNA?	DNA?	J1.TSA.vs.J1.DMSO	459.333	0.147727	0.10581	1.39615	0.16267	0.271821	FALSE	NoSigChange
ATAC	Eulor5B	DNA?	DNA?	J1.TSA.vs.J1.DMSO	167.477	0.29113	0.130539	2.23021	0.0257335	0.0863664	FALSE	NoSigChange
ATAC	Eulor6A	DNA?	DNA?	J1.TSA.vs.J1.DMSO	78.8432	0.0752974	0.15775	0.47732	0.633134	0.721979	FALSE	NoSigChange
ATAC	Eulor6B	DNA?	DNA?	J1.TSA.vs.J1.DMSO	289.914	0.181953	0.11923	1.52606	0.126994	0.229064	FALSE	NoSigChange
ATAC	Eulor6C	DNA?	DNA?	J1.TSA.vs.J1.DMSO	58.5818	0.270449	0.195602	1.38265	0.166773	0.277413	FALSE	NoSigChange
ATAC	Eulor6D	DNA?	DNA?	J1.TSA.vs.J1.DMSO	479.39	-0.0998894	0.0921188	-1.08435	0.278208	0.394775	FALSE	NoSigChange
ATAC	Eulor6E	DNA?	DNA?	J1.TSA.vs.J1.DMSO	94.8811	0.175241	0.143654	1.21988	0.222511	0.334851	FALSE	NoSigChange
ATAC	Eulor8	DNA	TcMar?	J1.TSA.vs.J1.DMSO	851.839	-0.312618	0.0771595	-4.05158	5.0872e-05	0.000946342	TRUE	SigDecrease
ATAC	Eulor9A	DNA	DNA	J1.TSA.vs.J1.DMSO	298.505	-0.144824	0.121126	-1.19565	0.231835	0.346854	FALSE	NoSigChange
ATAC	Eulor9B	DNA	DNA	J1.TSA.vs.J1.DMSO	49.1246	0.0799934	0.211635	0.377979	0.705446	0.773613	FALSE	NoSigChange
ATAC	Eulor9C	DNA	DNA	J1.TSA.vs.J1.DMSO	290.526	-0.124768	0.0928169	-1.34424	0.178872	0.289799	FALSE	NoSigChange
ATAC	FAM	SINE	Alu	J1.TSA.vs.J1.DMSO	473.98	-0.172916	0.077353	-2.23541	0.0253901	0.0861428	FALSE	NoSigChange
ATAC	FordPrefect	DNA	hAT-Tip100	J1.TSA.vs.J1.DMSO	2866.2	0.10592	0.0459071	2.30728	0.0210392	0.0755454	FALSE	NoSigChange
ATAC	FordPrefect_a	DNA	hAT-Tip100	J1.TSA.vs.J1.DMSO	382.136	0.179373	0.0935312	1.91779	0.0551376	0.13449	FALSE	NoSigChange
ATAC	G-rich	Low_complexity	Low_complexity	J1.TSA.vs.J1.DMSO	162631	-0.214052	0.118631	-1.80436	0.0711751	0.157216	FALSE	NoSigChange
ATAC	GA-rich	Low_complexity	Low_complexity	J1.TSA.vs.J1.DMSO	104513	0.0195617	0.0362817	0.539163	0.589774	0.68467	FALSE	NoSigChange
ATAC	GAAAAn	Simple_repeat	Simple_repeat	J1.TSA.vs.J1.DMSO	5755.25	0.232808	0.127548	1.82526	0.0679612	0.151652	FALSE	NoSigChange
ATAC	GAAAn	Simple_repeat	Simple_repeat	J1.TSA.vs.J1.DMSO	23145.4	0.234196	0.139399	1.68005	0.0929482	0.186865	FALSE	NoSigChange
ATAC	GAAn	Simple_repeat	Simple_repeat	J1.TSA.vs.J1.DMSO	12557	0.228324	0.136987	1.66676	0.0955613	0.191619	FALSE	NoSigChange
ATAC	GAATGn	Simple_repeat	Simple_repeat	J1.TSA.vs.J1.DMSO	120.754	0.167311	0.149674	1.11783	0.263639	0.377956	FALSE	NoSigChange
ATAC	GACTGn	Simple_repeat	Simple_repeat	J1.TSA.vs.J1.DMSO	140.267	-0.109424	0.154273	-0.709286	0.478147	0.589663	FALSE	NoSigChange
ATAC	GAGAAn	Simple_repeat	Simple_repeat	J1.TSA.vs.J1.DMSO	5373.93	0.146877	0.0796143	1.84486	0.0650575	0.147286	FALSE	NoSigChange
ATAC	GAGTGn	Simple_repeat	Simple_repeat	J1.TSA.vs.J1.DMSO	272.116	0.313652	0.107437	2.9194	0.00350703	0.0219568	TRUE	SigIncrease
ATAC	GAn	Simple_repeat	Simple_repeat	J1.TSA.vs.J1.DMSO	146571	0.139934	0.0587697	2.38106	0.0172628	0.0663794	FALSE	NoSigChange
ATAC	GATTGn	Simple_repeat	Simple_repeat	J1.TSA.vs.J1.DMSO	47.8035	0.404613	0.185399	2.1824	0.0290804	0.0921973	FALSE	NoSigChange
ATAC	GC_rich	Low_complexity	Low_complexity	J1.TSA.vs.J1.DMSO	345401	-0.447152	0.203324	-2.19921	0.027863	0.090151	FALSE	NoSigChange
ATAC	GCATGn	Simple_repeat	Simple_repeat	J1.TSA.vs.J1.DMSO	146.124	0.145341	0.123216	1.17956	0.238176	0.352204	FALSE	NoSigChange
ATAC	GCCTAAn	Simple_repeat	Simple_repeat	J1.TSA.vs.J1.DMSO	286.14	0.18566	0.10966	1.69305	0.0904457	0.183748	FALSE	NoSigChange
ATAC	GCCTGn	Simple_repeat	Simple_repeat	J1.TSA.vs.J1.DMSO	730.564	-0.113463	0.166638	-0.680893	0.495939	0.606278	FALSE	NoSigChange
ATAC	GCGTGn	Simple_repeat	Simple_repeat	J1.TSA.vs.J1.DMSO	182.534	-0.289047	0.181624	-1.59146	0.111506	0.212027	FALSE	NoSigChange
ATAC	GCTGn	Simple_repeat	Simple_repeat	J1.TSA.vs.J1.DMSO	1384.49	-0.170667	0.105743	-1.61399	0.106531	0.205604	FALSE	NoSigChange
ATAC	GCTTGn	Simple_repeat	Simple_repeat	J1.TSA.vs.J1.DMSO	263.293	-0.0803219	0.107322	-0.748417	0.454209	0.566477	FALSE	NoSigChange
ATAC	GGAAAn	Simple_repeat	Simple_repeat	J1.TSA.vs.J1.DMSO	3243.08	0.127184	0.107559	1.18246	0.237024	0.351214	FALSE	NoSigChange
ATAC	GGAAn	Simple_repeat	Simple_repeat	J1.TSA.vs.J1.DMSO	19748.9	0.140595	0.0897574	1.56639	0.117258	0.217865	FALSE	NoSigChange
ATAC	GGAGAAn	Simple_repeat	Simple_repeat	J1.TSA.vs.J1.DMSO	3942.51	0.0717124	0.0619689	1.15723	0.247178	0.362778	FALSE	NoSigChange
ATAC	GGAGAn	Simple_repeat	Simple_repeat	J1.TSA.vs.J1.DMSO	6820.35	0.212226	0.0554514	3.82725	0.000129583	0.00190548	TRUE	SigIncrease
ATAC	GGAn	Simple_repeat	Simple_repeat	J1.TSA.vs.J1.DMSO	30694.2	0.00545662	0.0588701	0.0926892	0.926151	0.942646	FALSE	NoSigChange
ATAC	GGATGn	Simple_repeat	Simple_repeat	J1.TSA.vs.J1.DMSO	1553.04	-0.166991	0.103569	-1.61236	0.106883	0.205835	FALSE	NoSigChange
ATAC	GGCTGn	Simple_repeat	Simple_repeat	J1.TSA.vs.J1.DMSO	3218.91	-0.261007	0.140133	-1.86256	0.0625242	0.144734	FALSE	NoSigChange
ATAC	GGGAAn	Simple_repeat	Simple_repeat	J1.TSA.vs.J1.DMSO	3424.44	0.130766	0.0492296	2.65625	0.00790154	0.0388445	TRUE	SigIncrease
ATAC	GGGAGAn	Simple_repeat	Simple_repeat	J1.TSA.vs.J1.DMSO	9962.54	0.13038	0.0436065	2.98991	0.0027906	0.0187334	TRUE	SigIncrease
ATAC	GGGAn	Simple_repeat	Simple_repeat	J1.TSA.vs.J1.DMSO	19113	-0.0972618	0.0597362	-1.62819	0.103485	0.203283	FALSE	NoSigChange
ATAC	GGGGAn	Simple_repeat	Simple_repeat	J1.TSA.vs.J1.DMSO	6157.58	0.0306567	0.0753904	0.406639	0.684273	0.760357	FALSE	NoSigChange
ATAC	GGGTGn	Simple_repeat	Simple_repeat	J1.TSA.vs.J1.DMSO	6088.48	-0.0704914	0.106092	-0.664438	0.50641	0.615666	FALSE	NoSigChange
ATAC	GGTTGn	Simple_repeat	Simple_repeat	J1.TSA.vs.J1.DMSO	432.721	0.0570584	0.0715897	0.79702	0.425439	0.537984	FALSE	NoSigChange
ATAC	Gn	Simple_repeat	Simple_repeat	J1.TSA.vs.J1.DMSO	3800.78	-0.0357084	0.0992397	-0.35982	0.718982	0.785084	FALSE	NoSigChange
ATAC	GSAT_MM	Satellite	Satellite	J1.TSA.vs.J1.DMSO	644.374	0.172507	0.103774	1.66234	0.0964443	0.192639	FALSE	NoSigChange
ATAC	GTATGn	Simple_repeat	Simple_repeat	J1.TSA.vs.J1.DMSO	412.972	0.124444	0.103677	1.20031	0.23002	0.345142	FALSE	NoSigChange
ATAC	GTCTGn	Simple_repeat	Simple_repeat	J1.TSA.vs.J1.DMSO	410.33	0.120404	0.107544	1.11958	0.262892	0.377586	FALSE	NoSigChange
ATAC	GTGTGn	Simple_repeat	Simple_repeat	J1.TSA.vs.J1.DMSO	2031.45	0.0509644	0.0600312	0.848965	0.395901	0.508545	FALSE	NoSigChange
ATAC	GTTTGn	Simple_repeat	Simple_repeat	J1.TSA.vs.J1.DMSO	6379.07	0.146444	0.0569506	2.57143	0.0101281	0.0454229	TRUE	SigIncrease
ATAC	HAL1	LINE	L1	J1.TSA.vs.J1.DMSO	20665.5	0.0807335	0.0751944	1.07366	0.282973	0.399735	FALSE	NoSigChange
ATAC	HAL1_SS	LINE	L1	J1.TSA.vs.J1.DMSO	189.258	0.400048	0.207183	1.93089	0.0534961	0.132368	FALSE	NoSigChange
ATAC	HAL1b	LINE	L1	J1.TSA.vs.J1.DMSO	3430	0.119496	0.111738	1.06943	0.284876	0.400955	FALSE	NoSigChange
ATAC	HAL1M8	LINE	L1	J1.TSA.vs.J1.DMSO	4162.2	0.105991	0.0785278	1.34973	0.177102	0.288477	FALSE	NoSigChange
ATAC	HAL1ME	LINE	L1	J1.TSA.vs.J1.DMSO	4132.5	0.151129	0.0977732	1.54571	0.122174	0.22213	FALSE	NoSigChange
ATAC	hAT-N1_Mam	DNA	hAT?	J1.TSA.vs.J1.DMSO	864.554	0.163117	0.0938184	1.73864	0.0820976	0.171993	FALSE	NoSigChange
ATAC	Helitron1Na_Mam	RC	Helitron	J1.TSA.vs.J1.DMSO	329.468	0.139876	0.105266	1.32879	0.183918	0.296728	FALSE	NoSigChange
ATAC	Helitron1Nb_Mam	RC	Helitron	J1.TSA.vs.J1.DMSO	413.481	0.2364	0.115542	2.04601	0.0407556	0.112369	FALSE	NoSigChange
ATAC	Helitron2Na_Mam	RC?	Helitron?	J1.TSA.vs.J1.DMSO	298.433	0.0079276	0.116622	0.0679771	0.945804	0.956333	FALSE	NoSigChange
ATAC	Helitron3Na_Mam	RC	Helitron	J1.TSA.vs.J1.DMSO	1133.3	0.0447301	0.0751281	0.595383	0.551587	0.65411	FALSE	NoSigChange
ATAC	HERV16-int	LTR	ERVL	J1.TSA.vs.J1.DMSO	1979.6	0.133077	0.0749813	1.7748	0.0759307	0.164428	FALSE	NoSigChange
ATAC	HERVL40-int	LTR	ERVL	J1.TSA.vs.J1.DMSO	1439.68	0.188736	0.0714557	2.6413	0.00825878	0.0400992	TRUE	SigIncrease
ATAC	HERVL74-int	LTR	ERVL	J1.TSA.vs.J1.DMSO	1061.35	0.214335	0.0912874	2.34792	0.0188787	0.0705741	FALSE	NoSigChange
ATAC	HUERS-P3b-int	LTR	ERV1	J1.TSA.vs.J1.DMSO	11.1247	0.314065	0.379306	0.827997	0.407672	0.520203	FALSE	NoSigChange
ATAC	HY1	scRNA	scRNA	J1.TSA.vs.J1.DMSO	273.729	0.0127603	0.101937	0.125179	0.900382	0.9231	FALSE	NoSigChange
ATAC	HY3	scRNA	scRNA	J1.TSA.vs.J1.DMSO	125.044	-0.222519	0.151225	-1.47145	0.14117	0.246848	FALSE	NoSigChange
ATAC	HY4	scRNA	scRNA	J1.TSA.vs.J1.DMSO	11.9922	-0.442645	0.394254	-1.12274	0.261548	0.376006	FALSE	NoSigChange
ATAC	IAP-d-int	LTR	ERVK	J1.TSA.vs.J1.DMSO	14868.4	0.197274	0.0722084	2.732	0.00629503	0.0328362	TRUE	SigIncrease
ATAC	IAP1-MM_I-int	LTR	ERVK	J1.TSA.vs.J1.DMSO	9169.9	0.212755	0.0813765	2.61446	0.00893687	0.0415618	TRUE	SigIncrease
ATAC	IAP1-MM_LTR	LTR	ERVK	J1.TSA.vs.J1.DMSO	9149.59	0.078258	0.115471	0.677731	0.497943	0.608246	FALSE	NoSigChange
ATAC	IAPA_MM-int	LTR	ERVK	J1.TSA.vs.J1.DMSO	2491.51	0.351193	0.102662	3.42087	0.000624203	0.00625824	TRUE	SigIncrease
ATAC	IAPEy-int	LTR	ERVK	J1.TSA.vs.J1.DMSO	33181	0.432711	0.0893509	4.84283	1.28003e-06	5.64676e-05	TRUE	SigIncrease
ATAC	IAPEY_LTR	LTR	ERVK	J1.TSA.vs.J1.DMSO	23597.6	-0.0656021	0.103055	-0.636576	0.524401	0.63128	FALSE	NoSigChange
ATAC	IAPEY2_LTR	LTR	ERVK	J1.TSA.vs.J1.DMSO	25352.5	-0.222911	0.0949527	-2.3476	0.0188947	0.0705741	FALSE	NoSigChange
ATAC	IAPEY3-int	LTR	ERVK	J1.TSA.vs.J1.DMSO	40450.1	0.337242	0.0833193	4.04758	5.1749e-05	0.000951196	TRUE	SigIncrease
ATAC	IAPEY3_LTR	LTR	ERVK	J1.TSA.vs.J1.DMSO	10347.5	0.026864	0.0977693	0.274769	0.783494	0.834861	FALSE	NoSigChange
ATAC	IAPEY3C_LTR	LTR	ERVK	J1.TSA.vs.J1.DMSO	4935.5	0.234026	0.0800421	2.92378	0.00345806	0.0219352	TRUE	SigIncrease
ATAC	IAPEY4_I-int	LTR	ERVK	J1.TSA.vs.J1.DMSO	14577.4	0.153205	0.0387905	3.94954	7.83022e-05	0.00129657	TRUE	SigIncrease
ATAC	IAPEY4_LTR	LTR	ERVK	J1.TSA.vs.J1.DMSO	8511.29	0.0328981	0.12464	0.263944	0.791823	0.839104	FALSE	NoSigChange
ATAC	IAPEY5_I-int	LTR	ERVK	J1.TSA.vs.J1.DMSO	2406.66	0.325913	0.0896336	3.63606	0.00027684	0.00347514	TRUE	SigIncrease
ATAC	IAPEY5_LTR	LTR	ERVK	J1.TSA.vs.J1.DMSO	3015.32	0.168015	0.0820209	2.04844	0.0405166	0.11191	FALSE	NoSigChange
ATAC	IAPEz-int	LTR	ERVK	J1.TSA.vs.J1.DMSO	354740	0.224571	0.07162	3.13559	0.00171506	0.0132112	TRUE	SigIncrease
ATAC	IAPLTR1_Mm	LTR	ERVK	J1.TSA.vs.J1.DMSO	37059.9	0.0490353	0.11599	0.422755	0.672474	0.752391	FALSE	NoSigChange
ATAC	IAPLTR1a_Mm	LTR	ERVK	J1.TSA.vs.J1.DMSO	36094.3	0.0976807	0.108935	0.896692	0.369883	0.483983	FALSE	NoSigChange
ATAC	IAPLTR2_Mm	LTR	ERVK	J1.TSA.vs.J1.DMSO	44716	0.0727357	0.110167	0.660228	0.509107	0.617488	FALSE	NoSigChange
ATAC	IAPLTR2a	LTR	ERVK	J1.TSA.vs.J1.DMSO	16382.9	0.137014	0.114265	1.19909	0.230493	0.345251	FALSE	NoSigChange
ATAC	IAPLTR2a2_Mm	LTR	ERVK	J1.TSA.vs.J1.DMSO	25227.6	0.152992	0.0805358	1.89968	0.0574757	0.138013	FALSE	NoSigChange
ATAC	IAPLTR2b	LTR	ERVK	J1.TSA.vs.J1.DMSO	20547.7	0.153118	0.114332	1.33924	0.180491	0.29181	FALSE	NoSigChange
ATAC	IAPLTR3	LTR	ERVK	J1.TSA.vs.J1.DMSO	6539.93	0.290567	0.0851053	3.4142	0.000639691	0.0063313	TRUE	SigIncrease
ATAC	IAPLTR3-int	LTR	ERVK	J1.TSA.vs.J1.DMSO	25993.1	0.322648	0.0772761	4.17527	2.97637e-05	0.000650509	TRUE	SigIncrease
ATAC	IAPLTR4	LTR	ERVK	J1.TSA.vs.J1.DMSO	6432.65	0.360145	0.0826902	4.35536	1.32849e-05	0.000353652	TRUE	SigIncrease
ATAC	IAPLTR4_I	LTR	ERVK	J1.TSA.vs.J1.DMSO	2852.19	0.318297	0.10002	3.18232	0.00146101	0.0120631	TRUE	SigIncrease
ATAC	ID	SINE	ID	J1.TSA.vs.J1.DMSO	33049.7	-0.0320043	0.0499935	-0.640168	0.522063	0.629247	FALSE	NoSigChange
ATAC	ID_B1	SINE	B4	J1.TSA.vs.J1.DMSO	678024	-0.0430979	0.0523942	-0.82257	0.410752	0.522407	FALSE	NoSigChange
ATAC	ID2	SINE	ID	J1.TSA.vs.J1.DMSO	23856.7	-0.0329453	0.0442117	-0.745171	0.456168	0.568462	FALSE	NoSigChange
ATAC	ID4	SINE	ID	J1.TSA.vs.J1.DMSO	99379.4	-0.0015988	0.0466615	-0.0342639	0.972667	0.976461	FALSE	NoSigChange
ATAC	ID4_	SINE	ID	J1.TSA.vs.J1.DMSO	105740	0.00530142	0.0474903	0.111631	0.911116	0.93284	FALSE	NoSigChange
ATAC	IMPB_01	Satellite	Satellite	J1.TSA.vs.J1.DMSO	147090	0.112039	0.0495414	2.26151	0.0237275	0.0821417	FALSE	NoSigChange
ATAC	Kanga1	DNA	TcMar-Tc2	J1.TSA.vs.J1.DMSO	1753.78	0.0762817	0.0902167	0.845539	0.39781	0.510148	FALSE	NoSigChange
ATAC	Kanga11a	DNA	TcMar-Tc2	J1.TSA.vs.J1.DMSO	1067.62	0.178229	0.105793	1.68469	0.0920486	0.185618	FALSE	NoSigChange
ATAC	Kanga1a	DNA	TcMar-Tc2	J1.TSA.vs.J1.DMSO	1063.51	0.166605	0.0972855	1.71254	0.0867973	0.17934	FALSE	NoSigChange
ATAC	Kanga1b	DNA	TcMar-Tc2	J1.TSA.vs.J1.DMSO	942.063	-0.0909072	0.0586318	-1.55048	0.121027	0.220882	FALSE	NoSigChange
ATAC	Kanga1c	DNA	TcMar-Tc2	J1.TSA.vs.J1.DMSO	883.428	0.171481	0.112521	1.52399	0.127512	0.229729	FALSE	NoSigChange
ATAC	Kanga1d	DNA	TcMar-Tc2	J1.TSA.vs.J1.DMSO	704.791	0.0152653	0.0785011	0.194459	0.845816	0.878238	FALSE	NoSigChange
ATAC	Kanga2_a	DNA	TcMar-Tc2	J1.TSA.vs.J1.DMSO	1851.81	0.163704	0.114934	1.42433	0.15435	0.26074	FALSE	NoSigChange
ATAC	L1_Mm	LINE	L1	J1.TSA.vs.J1.DMSO	64132.2	0.279755	0.119376	2.34349	0.0191045	0.0709071	FALSE	NoSigChange
ATAC	L1_Mur1	LINE	L1	J1.TSA.vs.J1.DMSO	79436.3	0.348004	0.12895	2.69874	0.00696015	0.0350924	TRUE	SigIncrease
ATAC	L1_Mur2	LINE	L1	J1.TSA.vs.J1.DMSO	205283	0.329985	0.125466	2.63009	0.00853634	0.0406794	TRUE	SigIncrease
ATAC	L1_Mur3	LINE	L1	J1.TSA.vs.J1.DMSO	215914	0.28702	0.130511	2.19921	0.0278633	0.090151	FALSE	NoSigChange
ATAC	L1_Mus1	LINE	L1	J1.TSA.vs.J1.DMSO	457034	0.328593	0.102176	3.21594	0.00130016	0.0109101	TRUE	SigIncrease
ATAC	L1_Mus2	LINE	L1	J1.TSA.vs.J1.DMSO	332668	0.33693	0.104078	3.23729	0.00120669	0.0105262	TRUE	SigIncrease
ATAC	L1_Mus3	LINE	L1	J1.TSA.vs.J1.DMSO	689765	0.334576	0.110087	3.0392	0.00237205	0.0164235	TRUE	SigIncrease
ATAC	L1_Mus4	LINE	L1	J1.TSA.vs.J1.DMSO	208515	0.33057	0.100407	3.29229	0.000993739	0.00897271	TRUE	SigIncrease
ATAC	L1_Rod	LINE	L1	J1.TSA.vs.J1.DMSO	71147.6	0.27311	0.134962	2.0236	0.043011	0.116712	FALSE	NoSigChange
ATAC	L1M	LINE	L1	J1.TSA.vs.J1.DMSO	1316.35	0.0967098	0.0993888	0.973046	0.330531	0.44805	FALSE	NoSigChange
ATAC	L1M1	LINE	L1	J1.TSA.vs.J1.DMSO	3426.73	0.201939	0.109142	1.85025	0.0642772	0.146332	FALSE	NoSigChange
ATAC	L1M2	LINE	L1	J1.TSA.vs.J1.DMSO	98954.9	0.227636	0.128169	1.77606	0.0757224	0.164428	FALSE	NoSigChange
ATAC	L1M2a	LINE	L1	J1.TSA.vs.J1.DMSO	1482.71	0.163584	0.0815465	2.00603	0.0448535	0.11903	FALSE	NoSigChange
ATAC	L1M2a1	LINE	L1	J1.TSA.vs.J1.DMSO	49.3316	-0.0394043	0.234526	-0.168017	0.86657	0.894972	FALSE	NoSigChange
ATAC	L1M2b	LINE	L1	J1.TSA.vs.J1.DMSO	86.0507	-0.185145	0.15527	-1.1924	0.233103	0.347404	FALSE	NoSigChange
ATAC	L1M2c	LINE	L1	J1.TSA.vs.J1.DMSO	1830.72	0.15634	0.123225	1.26874	0.204534	0.31762	FALSE	NoSigChange
ATAC	L1M3	LINE	L1	J1.TSA.vs.J1.DMSO	35379.9	0.197087	0.11187	1.76175	0.0781112	0.168078	FALSE	NoSigChange
ATAC	L1M3a	LINE	L1	J1.TSA.vs.J1.DMSO	708.17	0.162044	0.119547	1.35548	0.175264	0.28666	FALSE	NoSigChange
ATAC	L1M3b	LINE	L1	J1.TSA.vs.J1.DMSO	1175.03	0.25563	0.109357	2.33758	0.0194093	0.0712912	FALSE	NoSigChange
ATAC	L1M3c	LINE	L1	J1.TSA.vs.J1.DMSO	1908.97	0.245292	0.122407	2.00391	0.0450796	0.119183	FALSE	NoSigChange
ATAC	L1M3d	LINE	L1	J1.TSA.vs.J1.DMSO	992.475	0.202147	0.111319	1.81593	0.0693818	0.153916	FALSE	NoSigChange
ATAC	L1M3de	LINE	L1	J1.TSA.vs.J1.DMSO	1038.9	0.22033	0.109052	2.02042	0.0433401	0.117193	FALSE	NoSigChange
ATAC	L1M3e	LINE	L1	J1.TSA.vs.J1.DMSO	5340.56	0.258688	0.0581243	4.45059	8.56329e-06	0.000264434	TRUE	SigIncrease
ATAC	L1M3f	LINE	L1	J1.TSA.vs.J1.DMSO	729.319	0.0940208	0.098918	0.950493	0.341862	0.458529	FALSE	NoSigChange
ATAC	L1M4	LINE	L1	J1.TSA.vs.J1.DMSO	71184.2	0.127104	0.0987208	1.28751	0.197917	0.311373	FALSE	NoSigChange
ATAC	L1M4a1	LINE	L1	J1.TSA.vs.J1.DMSO	3350.37	0.129348	0.0945566	1.36794	0.17133	0.282612	FALSE	NoSigChange
ATAC	L1M4a2	LINE	L1	J1.TSA.vs.J1.DMSO	3825.13	0.181173	0.10105	1.7929	0.0729892	0.159751	FALSE	NoSigChange
ATAC	L1M4b	LINE	L1	J1.TSA.vs.J1.DMSO	17956.4	0.0446715	0.0429757	1.03946	0.298591	0.411996	FALSE	NoSigChange
ATAC	L1M4c	LINE	L1	J1.TSA.vs.J1.DMSO	12076.2	0.190978	0.102353	1.86588	0.0620579	0.143915	FALSE	NoSigChange
ATAC	L1M5	LINE	L1	J1.TSA.vs.J1.DMSO	72027	0.163032	0.117389	1.38882	0.164887	0.27493	FALSE	NoSigChange
ATAC	L1M6	LINE	L1	J1.TSA.vs.J1.DMSO	1857.21	0.0138936	0.0682496	0.203571	0.838689	0.872598	FALSE	NoSigChange
ATAC	L1M6B	LINE	L1	J1.TSA.vs.J1.DMSO	266.818	-0.104181	0.0838027	-1.24317	0.213806	0.324899	FALSE	NoSigChange
ATAC	L1M7	LINE	L1	J1.TSA.vs.J1.DMSO	1236.13	-0.0238344	0.079152	-0.301123	0.763321	0.82073	FALSE	NoSigChange
ATAC	L1M8	LINE	L1	J1.TSA.vs.J1.DMSO	1294.81	0.141986	0.0815604	1.74087	0.0817057	0.171993	FALSE	NoSigChange
ATAC	L1MA10	LINE	L1	J1.TSA.vs.J1.DMSO	4005.42	0.194334	0.120985	1.60627	0.108214	0.207299	FALSE	NoSigChange
ATAC	L1MA4	LINE	L1	J1.TSA.vs.J1.DMSO	44063	0.210251	0.121596	1.7291	0.0837918	0.174179	FALSE	NoSigChange
ATAC	L1MA4A	LINE	L1	J1.TSA.vs.J1.DMSO	16321.4	0.182708	0.118164	1.54623	0.122049	0.22213	FALSE	NoSigChange
ATAC	L1MA5	LINE	L1	J1.TSA.vs.J1.DMSO	28458	0.207392	0.113423	1.82848	0.0674775	0.151432	FALSE	NoSigChange
ATAC	L1MA5A	LINE	L1	J1.TSA.vs.J1.DMSO	8597.85	0.200775	0.117338	1.71107	0.0870677	0.179483	FALSE	NoSigChange
ATAC	L1MA6	LINE	L1	J1.TSA.vs.J1.DMSO	41686.5	0.234665	0.118887	1.97384	0.0483998	0.124355	FALSE	NoSigChange
ATAC	L1MA7	LINE	L1	J1.TSA.vs.J1.DMSO	18153.9	0.222981	0.118679	1.87886	0.0602641	0.141841	FALSE	NoSigChange
ATAC	L1MA8	LINE	L1	J1.TSA.vs.J1.DMSO	22174	0.214361	0.115502	1.85591	0.063466	0.145715	FALSE	NoSigChange
ATAC	L1MA9	LINE	L1	J1.TSA.vs.J1.DMSO	25643.6	0.232721	0.119224	1.95196	0.050943	0.128111	FALSE	NoSigChange
ATAC	L1MB1	LINE	L1	J1.TSA.vs.J1.DMSO	16028.3	0.18837	0.108594	1.73462	0.0828077	0.173011	FALSE	NoSigChange
ATAC	L1MB2	LINE	L1	J1.TSA.vs.J1.DMSO	19433.5	0.124777	0.0787872	1.58372	0.113257	0.213603	FALSE	NoSigChange
ATAC	L1MB3	LINE	L1	J1.TSA.vs.J1.DMSO	37476	0.0912624	0.071446	1.27736	0.201475	0.314856	FALSE	NoSigChange
ATAC	L1MB4	LINE	L1	J1.TSA.vs.J1.DMSO	16862.9	0.0780898	0.0803	0.972476	0.330814	0.44805	FALSE	NoSigChange
ATAC	L1MB5	LINE	L1	J1.TSA.vs.J1.DMSO	24916.7	0.0963778	0.074928	1.28627	0.198348	0.311373	FALSE	NoSigChange
ATAC	L1MB7	LINE	L1	J1.TSA.vs.J1.DMSO	44901.7	0.0788735	0.0842989	0.935642	0.349458	0.46514	FALSE	NoSigChange
ATAC	L1MB8	LINE	L1	J1.TSA.vs.J1.DMSO	37052	0.140151	0.0893687	1.56823	0.116826	0.217587	FALSE	NoSigChange
ATAC	L1MC	LINE	L1	J1.TSA.vs.J1.DMSO	25937.9	0.178871	0.112366	1.59186	0.111417	0.212027	FALSE	NoSigChange
ATAC	L1MC1	LINE	L1	J1.TSA.vs.J1.DMSO	40642.7	0.169904	0.0901693	1.88428	0.0595277	0.14092	FALSE	NoSigChange
ATAC	L1MC2	LINE	L1	J1.TSA.vs.J1.DMSO	14717.6	0.187906	0.0946744	1.98476	0.0471713	0.12282	FALSE	NoSigChange
ATAC	L1MC3	LINE	L1	J1.TSA.vs.J1.DMSO	35867.7	0.17377	0.102054	1.70274	0.0886176	0.180986	FALSE	NoSigChange
ATAC	L1MC4	LINE	L1	J1.TSA.vs.J1.DMSO	31274.9	0.125958	0.0852119	1.47818	0.139361	0.245072	FALSE	NoSigChange
ATAC	L1MC4a	LINE	L1	J1.TSA.vs.J1.DMSO	17288	0.153965	0.0934311	1.6479	0.0993731	0.197213	FALSE	NoSigChange
ATAC	L1MC5	LINE	L1	J1.TSA.vs.J1.DMSO	17715.9	0.122132	0.0977902	1.24891	0.211697	0.323894	FALSE	NoSigChange
ATAC	L1MC5a	LINE	L1	J1.TSA.vs.J1.DMSO	12532.2	0.11557	0.0870452	1.3277	0.184278	0.296999	FALSE	NoSigChange
ATAC	L1MCa	LINE	L1	J1.TSA.vs.J1.DMSO	21792.4	0.173021	0.0994834	1.73919	0.0820011	0.171993	FALSE	NoSigChange
ATAC	L1MCb	LINE	L1	J1.TSA.vs.J1.DMSO	4750.94	0.225946	0.112392	2.01035	0.0443946	0.118386	FALSE	NoSigChange
ATAC	L1MCc	LINE	L1	J1.TSA.vs.J1.DMSO	3245.09	0.0922667	0.0705478	1.30786	0.190921	0.304212	FALSE	NoSigChange
ATAC	L1MD	LINE	L1	J1.TSA.vs.J1.DMSO	26510.2	0.182685	0.117453	1.55538	0.119855	0.220304	FALSE	NoSigChange
ATAC	L1Md_A	LINE	L1	J1.TSA.vs.J1.DMSO	1.04699e+06	0.240827	0.0706539	3.40854	0.000653107	0.00642291	TRUE	SigIncrease
ATAC	L1Md_F	LINE	L1	J1.TSA.vs.J1.DMSO	125243	0.291411	0.0723788	4.02619	5.66889e-05	0.00100606	TRUE	SigIncrease
ATAC	L1Md_F2	LINE	L1	J1.TSA.vs.J1.DMSO	1.49353e+06	0.324196	0.102936	3.14948	0.00163564	0.0128848	TRUE	SigIncrease
ATAC	L1Md_F3	LINE	L1	J1.TSA.vs.J1.DMSO	312204	0.296984	0.0887588	3.34597	0.000819955	0.00767279	TRUE	SigIncrease
ATAC	L1Md_Gf	LINE	L1	J1.TSA.vs.J1.DMSO	106267	0.0537448	0.114612	0.468927	0.639122	0.725591	FALSE	NoSigChange
ATAC	L1Md_T	LINE	L1	J1.TSA.vs.J1.DMSO	1.82878e+06	0.111567	0.0659244	1.69235	0.0905793	0.183777	FALSE	NoSigChange
ATAC	L1MD1	LINE	L1	J1.TSA.vs.J1.DMSO	14550.9	0.148154	0.101397	1.46113	0.143979	0.249495	FALSE	NoSigChange
ATAC	L1MD2	LINE	L1	J1.TSA.vs.J1.DMSO	19239.9	0.11925	0.0919355	1.2971	0.194596	0.307844	FALSE	NoSigChange
ATAC	L1MD3	LINE	L1	J1.TSA.vs.J1.DMSO	12777.8	0.169394	0.0833207	2.03303	0.0420495	0.115023	FALSE	NoSigChange
ATAC	L1MDa	LINE	L1	J1.TSA.vs.J1.DMSO	20554.4	0.147847	0.0889028	1.66302	0.0963081	0.192616	FALSE	NoSigChange
ATAC	L1MDb	LINE	L1	J1.TSA.vs.J1.DMSO	3893.67	0.0638109	0.0392412	1.62612	0.103924	0.203561	FALSE	NoSigChange
ATAC	L1ME1	LINE	L1	J1.TSA.vs.J1.DMSO	31608.4	0.150142	0.103337	1.45294	0.14624	0.251848	FALSE	NoSigChange
ATAC	L1ME2	LINE	L1	J1.TSA.vs.J1.DMSO	15305.2	0.159695	0.102144	1.56343	0.117952	0.218892	FALSE	NoSigChange
ATAC	L1ME2z	LINE	L1	J1.TSA.vs.J1.DMSO	7819.57	0.104356	0.100115	1.04236	0.297244	0.410873	FALSE	NoSigChange
ATAC	L1ME3	LINE	L1	J1.TSA.vs.J1.DMSO	8767.88	0.140386	0.094756	1.48156	0.138458	0.244041	FALSE	NoSigChange
ATAC	L1ME3A	LINE	L1	J1.TSA.vs.J1.DMSO	11951.7	0.127216	0.0930369	1.36738	0.171508	0.282612	FALSE	NoSigChange
ATAC	L1ME3B	LINE	L1	J1.TSA.vs.J1.DMSO	3779.89	0.180072	0.101783	1.76917	0.076865	0.166035	FALSE	NoSigChange
ATAC	L1ME3C	LINE	L1	J1.TSA.vs.J1.DMSO	1545.33	0.18811	0.136154	1.3816	0.167094	0.277413	FALSE	NoSigChange
ATAC	L1ME3Cz	LINE	L1	J1.TSA.vs.J1.DMSO	4672.21	0.146936	0.114618	1.28196	0.199855	0.312958	FALSE	NoSigChange
ATAC	L1ME3D	LINE	L1	J1.TSA.vs.J1.DMSO	1739.21	0.205939	0.114427	1.79974	0.0719023	0.157919	FALSE	NoSigChange
ATAC	L1ME3E	LINE	L1	J1.TSA.vs.J1.DMSO	1753.56	0.206764	0.102164	2.02385	0.0429858	0.116712	FALSE	NoSigChange
ATAC	L1ME3F	LINE	L1	J1.TSA.vs.J1.DMSO	1542.31	0.129732	0.113746	1.14055	0.254059	0.369019	FALSE	NoSigChange
ATAC	L1ME3G	LINE	L1	J1.TSA.vs.J1.DMSO	4901.19	0.134797	0.100163	1.34578	0.178373	0.289799	FALSE	NoSigChange
ATAC	L1ME4a	LINE	L1	J1.TSA.vs.J1.DMSO	5682.21	0.207529	0.133169	1.55839	0.119141	0.220041	FALSE	NoSigChange
ATAC	L1ME4b	LINE	L1	J1.TSA.vs.J1.DMSO	8678.83	0.0772916	0.0825489	0.936313	0.349112	0.465081	FALSE	NoSigChange
ATAC	L1ME4c	LINE	L1	J1.TSA.vs.J1.DMSO	4141.43	0.151312	0.115961	1.30485	0.191943	0.305526	FALSE	NoSigChange
ATAC	L1ME5	LINE	L1	J1.TSA.vs.J1.DMSO	868.216	0.186394	0.103175	1.80658	0.0708271	0.156672	FALSE	NoSigChange
ATAC	L1MEa	LINE	L1	J1.TSA.vs.J1.DMSO	892.244	0.151208	0.109429	1.38179	0.167037	0.277413	FALSE	NoSigChange
ATAC	L1MEb	LINE	L1	J1.TSA.vs.J1.DMSO	1780.61	0.160518	0.0915406	1.75352	0.0795132	0.169102	FALSE	NoSigChange
ATAC	L1MEc	LINE	L1	J1.TSA.vs.J1.DMSO	31297.1	0.142598	0.0993134	1.43584	0.151047	0.256564	FALSE	NoSigChange
ATAC	L1MEd	LINE	L1	J1.TSA.vs.J1.DMSO	14103.9	0.160726	0.107133	1.50025	0.133551	0.237861	FALSE	NoSigChange
ATAC	L1MEf	LINE	L1	J1.TSA.vs.J1.DMSO	15377.8	0.186036	0.114488	1.62495	0.104174	0.203561	FALSE	NoSigChange
ATAC	L1MEg	LINE	L1	J1.TSA.vs.J1.DMSO	16179.4	0.193616	0.11763	1.64597	0.0997695	0.19724	FALSE	NoSigChange
ATAC	L1MEg1	LINE	L1	J1.TSA.vs.J1.DMSO	521.349	-0.0324174	0.0977272	-0.331713	0.740106	0.803038	FALSE	NoSigChange
ATAC	L1MEg2	LINE	L1	J1.TSA.vs.J1.DMSO	696.933	0.179233	0.0903487	1.98379	0.0472788	0.122878	FALSE	NoSigChange
ATAC	L1MEh	LINE	L1	J1.TSA.vs.J1.DMSO	933.348	0.0876611	0.12076	0.72591	0.467894	0.579798	FALSE	NoSigChange
ATAC	L1MEi	LINE	L1	J1.TSA.vs.J1.DMSO	2389.88	0.0863055	0.0923918	0.934125	0.35024	0.465779	FALSE	NoSigChange
ATAC	L1MEj	LINE	L1	J1.TSA.vs.J1.DMSO	1150.93	0.0152825	0.0676876	0.22578	0.821373	0.858381	FALSE	NoSigChange
ATAC	L1P5	LINE	L1	J1.TSA.vs.J1.DMSO	588.313	0.188896	0.123771	1.52618	0.126966	0.229064	FALSE	NoSigChange
ATAC	L1PB4	LINE	L1	J1.TSA.vs.J1.DMSO	898.124	0.216179	0.144683	1.49416	0.135134	0.239825	FALSE	NoSigChange
ATAC	L1VL1	LINE	L1	J1.TSA.vs.J1.DMSO	42493.1	0.237986	0.0838225	2.83916	0.0045232	0.0259474	TRUE	SigIncrease
ATAC	L1VL2	LINE	L1	J1.TSA.vs.J1.DMSO	93954.4	0.303561	0.0995197	3.05025	0.00228647	0.0160354	TRUE	SigIncrease
ATAC	L1VL4	LINE	L1	J1.TSA.vs.J1.DMSO	118370	0.304434	0.115845	2.62795	0.00859024	0.0408102	TRUE	SigIncrease
ATAC	L2	LINE	L2	J1.TSA.vs.J1.DMSO	126450	0.059113	0.0439724	1.34432	0.178845	0.289799	FALSE	NoSigChange
ATAC	L2a	LINE	L2	J1.TSA.vs.J1.DMSO	155210	0.0477149	0.0440477	1.08326	0.278695	0.394775	FALSE	NoSigChange
ATAC	L2b	LINE	L2	J1.TSA.vs.J1.DMSO	84911.8	-0.0128067	0.0433527	-0.295408	0.767683	0.823126	FALSE	NoSigChange
ATAC	L2c	LINE	L2	J1.TSA.vs.J1.DMSO	68410.4	0.033531	0.0438028	0.7655	0.443974	0.55622	FALSE	NoSigChange
ATAC	L3	LINE	CR1	J1.TSA.vs.J1.DMSO	49467.7	0.0455017	0.0467137	0.974054	0.33003	0.447858	FALSE	NoSigChange
ATAC	L3b	LINE	CR1	J1.TSA.vs.J1.DMSO	11265.7	0.0350575	0.036278	0.966357	0.333866	0.451391	FALSE	NoSigChange
ATAC	L4_A_Mam	LINE	RTE-X	J1.TSA.vs.J1.DMSO	3953.13	0.10329	0.0705386	1.4643	0.143111	0.248554	FALSE	NoSigChange
ATAC	L4_B_Mam	LINE	RTE-X	J1.TSA.vs.J1.DMSO	1908.74	0.13866	0.0854413	1.62286	0.104618	0.203696	FALSE	NoSigChange
ATAC	L4_C_Mam	LINE	RTE-X	J1.TSA.vs.J1.DMSO	3202.87	0.0971441	0.0675696	1.43769	0.150522	0.256274	FALSE	NoSigChange
ATAC	L5	LINE	RTE-X	J1.TSA.vs.J1.DMSO	669.314	0.0979159	0.0955708	1.02454	0.305581	0.419789	FALSE	NoSigChange
ATAC	LFSINE_Vert	SINE	tRNA	J1.TSA.vs.J1.DMSO	6864.47	-0.0448696	0.0277066	-1.61945	0.105349	0.204413	FALSE	NoSigChange
ATAC	Looper	DNA	PiggyBac	J1.TSA.vs.J1.DMSO	1101.29	0.0705999	0.109731	0.643393	0.519969	0.627237	FALSE	NoSigChange
ATAC	LSU-rRNA_Hsa	rRNA	rRNA	J1.TSA.vs.J1.DMSO	24484.3	-0.130138	0.2906	-0.447825	0.65428	0.736836	FALSE	NoSigChange
ATAC	LTR10_RN	LTR	ERVK	J1.TSA.vs.J1.DMSO	5157.69	0.0941906	0.0415327	2.26787	0.0233373	0.0817069	FALSE	NoSigChange
ATAC	LTR101_Mam	LTR	ERVL	J1.TSA.vs.J1.DMSO	1416.91	-0.128042	0.0635509	-2.01479	0.0439269	0.118046	FALSE	NoSigChange
ATAC	LTR102_Mam	LTR	ERVL	J1.TSA.vs.J1.DMSO	1567.36	0.0728307	0.0767115	0.94941	0.342412	0.458529	FALSE	NoSigChange
ATAC	LTR103_Mam	LTR	ERV1?	J1.TSA.vs.J1.DMSO	555.715	-0.364326	0.0832613	-4.37569	1.21048e-05	0.000339164	TRUE	SigDecrease
ATAC	LTR103b_Mam	LTR	ERV1?	J1.TSA.vs.J1.DMSO	338.543	0.123026	0.0855768	1.43761	0.150545	0.256274	FALSE	NoSigChange
ATAC	LTR104_Mam	LTR	Gypsy	J1.TSA.vs.J1.DMSO	2002.96	-0.0461784	0.0432097	-1.0687	0.285203	0.40105	FALSE	NoSigChange
ATAC	LTR105_Mam	LTR	ERVL	J1.TSA.vs.J1.DMSO	1302.14	0.0171871	0.0612872	0.280436	0.779143	0.832524	FALSE	NoSigChange
ATAC	LTR106_Mam	LTR	LTR	J1.TSA.vs.J1.DMSO	781.995	0.13441	0.128381	1.04697	0.295116	0.409201	FALSE	NoSigChange
ATAC	LTR107_Mam	LTR	LTR	J1.TSA.vs.J1.DMSO	544.277	0.0617003	0.107794	0.572388	0.567059	0.667152	FALSE	NoSigChange
ATAC	LTR108a_Mam	LTR	ERVL	J1.TSA.vs.J1.DMSO	289.989	0.0627625	0.0886846	0.707705	0.479129	0.590403	FALSE	NoSigChange
ATAC	LTR108b_Mam	LTR	ERVL	J1.TSA.vs.J1.DMSO	154.769	0.133486	0.159604	0.836358	0.402954	0.515888	FALSE	NoSigChange
ATAC	LTR108c_Mam	LTR	ERVL	J1.TSA.vs.J1.DMSO	217.987	-0.0733318	0.121898	-0.601581	0.547453	0.650706	FALSE	NoSigChange
ATAC	LTR108d_Mam	LTR	ERVL	J1.TSA.vs.J1.DMSO	229.015	0.0839837	0.101696	0.825833	0.408899	0.520907	FALSE	NoSigChange
ATAC	LTR108e_Mam	LTR	ERVL	J1.TSA.vs.J1.DMSO	235.308	0.226773	0.0993228	2.28319	0.0224192	0.079211	FALSE	NoSigChange
ATAC	LTR109A2	LTR	ERV1	J1.TSA.vs.J1.DMSO	159.264	-0.147968	0.130822	-1.13106	0.258029	0.373253	FALSE	NoSigChange
ATAC	LTR16A	LTR	ERVL	J1.TSA.vs.J1.DMSO	12815.4	0.044214	0.0415172	1.06496	0.286896	0.401788	FALSE	NoSigChange
ATAC	LTR16A1	LTR	ERVL	J1.TSA.vs.J1.DMSO	5236.08	0.0643345	0.0529593	1.21479	0.224446	0.337434	FALSE	NoSigChange
ATAC	LTR16A2	LTR	ERVL	J1.TSA.vs.J1.DMSO	3362.45	0.103129	0.0392954	2.62445	0.00867878	0.0411044	TRUE	SigIncrease
ATAC	LTR16B	LTR	ERVL	J1.TSA.vs.J1.DMSO	2249.85	-0.0323763	0.049797	-0.650165	0.515586	0.622898	FALSE	NoSigChange
ATAC	LTR16B1	LTR	ERVL	J1.TSA.vs.J1.DMSO	2787.62	0.128938	0.0607931	2.12093	0.0339279	0.101916	FALSE	NoSigChange
ATAC	LTR16B2	LTR	ERVL	J1.TSA.vs.J1.DMSO	3347.37	0.0539838	0.045546	1.18526	0.235915	0.35058	FALSE	NoSigChange
ATAC	LTR16C	LTR	ERVL	J1.TSA.vs.J1.DMSO	10569.5	0.0741921	0.0403298	1.83963	0.0658219	0.148798	FALSE	NoSigChange
ATAC	LTR16D	LTR	ERVL	J1.TSA.vs.J1.DMSO	1471.03	0.0948378	0.0611301	1.55141	0.120804	0.220735	FALSE	NoSigChange
ATAC	LTR16D1	LTR	ERVL	J1.TSA.vs.J1.DMSO	689.783	0.11445	0.0771709	1.48307	0.138056	0.24361	FALSE	NoSigChange
ATAC	LTR16D2	LTR	ERVL	J1.TSA.vs.J1.DMSO	464.984	0.240741	0.0738096	3.26165	0.00110765	0.00977267	TRUE	SigIncrease
ATAC	LTR16E1	LTR	ERVL	J1.TSA.vs.J1.DMSO	4015.27	0.027917	0.0413658	0.674882	0.499751	0.609972	FALSE	NoSigChange
ATAC	LTR16E2	LTR	ERVL	J1.TSA.vs.J1.DMSO	3392.3	0.0509952	0.0398557	1.2795	0.200722	0.313997	FALSE	NoSigChange
ATAC	LTR23-int	LTR	ERV1	J1.TSA.vs.J1.DMSO	30.4304	0.286529	0.253784	1.12903	0.258886	0.37357	FALSE	NoSigChange
ATAC	LTR27C	LTR	ERV1	J1.TSA.vs.J1.DMSO	39.8083	-0.0554261	0.244073	-0.227088	0.820355	0.858149	FALSE	NoSigChange
ATAC	LTR28	LTR	ERV1	J1.TSA.vs.J1.DMSO	81.5777	-0.160743	0.168904	-0.951684	0.341258	0.458175	FALSE	NoSigChange
ATAC	LTR28B	LTR	ERV1	J1.TSA.vs.J1.DMSO	705.511	0.0959281	0.056969	1.68386	0.0922079	0.185618	FALSE	NoSigChange
ATAC	LTR29	LTR	ERV1	J1.TSA.vs.J1.DMSO	190.478	0.320536	0.128335	2.49766	0.0125015	0.0527388	FALSE	NoSigChange
ATAC	LTR31	LTR	ERV1	J1.TSA.vs.J1.DMSO	2178.92	-0.157051	0.0688523	-2.28098	0.0225494	0.0794892	FALSE	NoSigChange
ATAC	LTR32	LTR	ERVL	J1.TSA.vs.J1.DMSO	42.944	0.294821	0.200723	1.46879	0.141889	0.247313	FALSE	NoSigChange
ATAC	LTR33	LTR	ERVL	J1.TSA.vs.J1.DMSO	12551.6	0.0495273	0.03391	1.46055	0.144138	0.249495	FALSE	NoSigChange
ATAC	LTR33A	LTR	ERVL	J1.TSA.vs.J1.DMSO	4425.76	-0.0251913	0.0396673	-0.635066	0.525385	0.63128	FALSE	NoSigChange
ATAC	LTR33A_	LTR	ERVL	J1.TSA.vs.J1.DMSO	4408.47	-0.0406699	0.0380017	-1.07021	0.284523	0.400825	FALSE	NoSigChange
ATAC	LTR33B	LTR	ERVL	J1.TSA.vs.J1.DMSO	2103.83	-0.0148938	0.0412762	-0.360831	0.718225	0.784813	FALSE	NoSigChange
ATAC	LTR33C	LTR	ERVL	J1.TSA.vs.J1.DMSO	2199.12	-0.0220341	0.0422894	-0.521031	0.602345	0.695605	FALSE	NoSigChange
ATAC	LTR34	LTR	ERV1	J1.TSA.vs.J1.DMSO	34.0039	-0.156148	0.250367	-0.623679	0.532838	0.637754	FALSE	NoSigChange
ATAC	LTR36	LTR	ERV1	J1.TSA.vs.J1.DMSO	29.3462	0.49669	0.332283	1.49478	0.134972	0.239811	FALSE	NoSigChange
ATAC	LTR37-int	LTR	ERV1	J1.TSA.vs.J1.DMSO	1381.42	0.131621	0.103977	1.26587	0.20556	0.317862	FALSE	NoSigChange
ATAC	LTR37A	LTR	ERV1	J1.TSA.vs.J1.DMSO	2638.47	0.0943422	0.0899276	1.04909	0.294136	0.408773	FALSE	NoSigChange
ATAC	LTR37B	LTR	ERV1	J1.TSA.vs.J1.DMSO	1751.12	0.231357	0.111261	2.0794	0.0375803	0.107148	FALSE	NoSigChange
ATAC	LTR39	LTR	ERV1	J1.TSA.vs.J1.DMSO	83.9832	-0.24985	0.160243	-1.5592	0.11895	0.219951	FALSE	NoSigChange
ATAC	LTR40a	LTR	ERVL	J1.TSA.vs.J1.DMSO	5507.69	0.136804	0.0688265	1.98766	0.0468488	0.122393	FALSE	NoSigChange
ATAC	LTR40A1	LTR	ERVL	J1.TSA.vs.J1.DMSO	658.995	0.0351543	0.103798	0.338681	0.73485	0.79902	FALSE	NoSigChange
ATAC	LTR40b	LTR	ERVL	J1.TSA.vs.J1.DMSO	4240.78	0.141251	0.0750206	1.88282	0.0597245	0.141001	FALSE	NoSigChange
ATAC	LTR40c	LTR	ERVL	J1.TSA.vs.J1.DMSO	1983.9	0.0114445	0.0491515	0.232841	0.815885	0.856753	FALSE	NoSigChange
ATAC	LTR41	LTR	ERVL	J1.TSA.vs.J1.DMSO	7335.93	-0.154181	0.0662382	-2.32768	0.0199292	0.0722317	FALSE	NoSigChange
ATAC	LTR41B	LTR	ERVL	J1.TSA.vs.J1.DMSO	4201.85	-0.119078	0.0639796	-1.86118	0.0627186	0.144966	FALSE	NoSigChange
ATAC	LTR44	LTR	ERV1	J1.TSA.vs.J1.DMSO	4.42302	0.0404288	0.706424	0.0572302	0.954362	0.962465	FALSE	NoSigChange
ATAC	LTR45	LTR	ERV1	J1.TSA.vs.J1.DMSO	132.842	0.0654037	0.11814	0.553611	0.579845	0.674744	FALSE	NoSigChange
ATAC	LTR45C	LTR	ERV1	J1.TSA.vs.J1.DMSO	117.242	0.127993	0.121044	1.05741	0.290325	0.405667	FALSE	NoSigChange
ATAC	LTR48	LTR	ERV1	J1.TSA.vs.J1.DMSO	4175.42	0.0749728	0.0444837	1.6854	0.0919117	0.185618	FALSE	NoSigChange
ATAC	LTR48B	LTR	ERV1	J1.TSA.vs.J1.DMSO	2344.69	-0.046952	0.0541487	-0.867093	0.385891	0.500265	FALSE	NoSigChange
ATAC	LTR50	LTR	ERVL	J1.TSA.vs.J1.DMSO	5297.36	-0.0371575	0.0325311	-1.14222	0.253364	0.368356	FALSE	NoSigChange
ATAC	LTR52	LTR	ERVL	J1.TSA.vs.J1.DMSO	1751.73	0.145718	0.0804876	1.81044	0.0702283	0.15557	FALSE	NoSigChange
ATAC	LTR52-int	LTR	ERVL	J1.TSA.vs.J1.DMSO	449.092	0.141043	0.12897	1.09361	0.274126	0.390452	FALSE	NoSigChange
ATAC	LTR53	LTR	ERVL	J1.TSA.vs.J1.DMSO	2018.11	0.139681	0.0510312	2.73716	0.00619723	0.032546	TRUE	SigIncrease
ATAC	LTR53B	LTR	ERVL	J1.TSA.vs.J1.DMSO	741.308	0.124147	0.0573748	2.16379	0.0304803	0.0950125	FALSE	NoSigChange
ATAC	LTR55	LTR	ERVL?	J1.TSA.vs.J1.DMSO	1929.25	-0.00570869	0.049975	-0.114231	0.909055	0.931374	FALSE	NoSigChange
ATAC	LTR58	LTR	ERV1	J1.TSA.vs.J1.DMSO	45.2857	0.171191	0.189041	0.905575	0.365161	0.478209	FALSE	NoSigChange
ATAC	LTR59	LTR	ERV1	J1.TSA.vs.J1.DMSO	36.3834	0.516057	0.219951	2.34624	0.018964	0.0705741	FALSE	NoSigChange
ATAC	LTR64	LTR	ERV1	J1.TSA.vs.J1.DMSO	38.1553	0.163374	0.234619	0.69634	0.486216	0.597705	FALSE	NoSigChange
ATAC	LTR65	LTR	ERV1	J1.TSA.vs.J1.DMSO	1399.79	-0.0510795	0.0484398	-1.0545	0.291656	0.406423	FALSE	NoSigChange
ATAC	LTR67B	LTR	ERVL	J1.TSA.vs.J1.DMSO	4768.03	-0.0590831	0.0378562	-1.56072	0.118589	0.219546	FALSE	NoSigChange
ATAC	LTR68	LTR	ERV1	J1.TSA.vs.J1.DMSO	602.509	0.0722682	0.0788883	0.916082	0.359624	0.474986	FALSE	NoSigChange
ATAC	LTR69	LTR	ERVL	J1.TSA.vs.J1.DMSO	592.831	0.279063	0.0880333	3.16997	0.00152453	0.0123273	TRUE	SigIncrease
ATAC	LTR72_RN	LTR	ERV1	J1.TSA.vs.J1.DMSO	7694.64	0.0614023	0.0417855	1.46947	0.141707	0.247313	FALSE	NoSigChange
ATAC	LTR73	LTR	ERV1	J1.TSA.vs.J1.DMSO	1280.23	0.0576557	0.0487335	1.18308	0.236777	0.351185	FALSE	NoSigChange
ATAC	LTR75	LTR	ERVL	J1.TSA.vs.J1.DMSO	722.577	-0.0158305	0.0689625	-0.229552	0.81844	0.857386	FALSE	NoSigChange
ATAC	LTR75_1	LTR	ERV1	J1.TSA.vs.J1.DMSO	33.2029	-0.0294067	0.278238	-0.105689	0.915829	0.935831	FALSE	NoSigChange
ATAC	LTR75B	LTR	ERVL	J1.TSA.vs.J1.DMSO	593.924	0.0162519	0.075425	0.215471	0.8294	0.864099	FALSE	NoSigChange
ATAC	LTR77	LTR	ERV1	J1.TSA.vs.J1.DMSO	218.435	0.212267	0.122911	1.727	0.0841675	0.17467	FALSE	NoSigChange
ATAC	LTR78	LTR	ERV1	J1.TSA.vs.J1.DMSO	4475.68	0.0532833	0.0508994	1.04684	0.295175	0.409201	FALSE	NoSigChange
ATAC	LTR78B	LTR	ERV1	J1.TSA.vs.J1.DMSO	2889.96	0.0359647	0.05515	0.652125	0.514321	0.621857	FALSE	NoSigChange
ATAC	LTR79	LTR	ERVL	J1.TSA.vs.J1.DMSO	2517.54	0.0361988	0.0493662	0.733271	0.463393	0.57607	FALSE	NoSigChange
ATAC	LTR80A	LTR	ERVL	J1.TSA.vs.J1.DMSO	705.986	0.322519	0.133595	2.41416	0.0157717	0.0626174	FALSE	NoSigChange
ATAC	LTR80B	LTR	ERVL	J1.TSA.vs.J1.DMSO	730.471	0.0888491	0.115618	0.768473	0.442206	0.555095	FALSE	NoSigChange
ATAC	LTR81	LTR	Gypsy	J1.TSA.vs.J1.DMSO	710.889	-0.029752	0.0955116	-0.311502	0.755419	0.81437	FALSE	NoSigChange
ATAC	LTR81A	LTR	Gypsy	J1.TSA.vs.J1.DMSO	1270.93	-0.147981	0.0497786	-2.97278	0.00295118	0.0194727	TRUE	SigDecrease
ATAC	LTR81B	LTR	Gypsy	J1.TSA.vs.J1.DMSO	1297.57	0.0868996	0.0636517	1.36524	0.172179	0.283331	FALSE	NoSigChange
ATAC	LTR81C	LTR	Gypsy	J1.TSA.vs.J1.DMSO	738.199	0.045997	0.0701717	0.655491	0.512151	0.620205	FALSE	NoSigChange
ATAC	LTR82A	LTR	ERVL	J1.TSA.vs.J1.DMSO	2305.35	0.14149	0.0775198	1.82521	0.0679686	0.151652	FALSE	NoSigChange
ATAC	LTR82B	LTR	ERVL	J1.TSA.vs.J1.DMSO	2046.32	0.107802	0.0632985	1.70308	0.0885539	0.180986	FALSE	NoSigChange
ATAC	LTR83	LTR	ERVL	J1.TSA.vs.J1.DMSO	1184.2	-0.114662	0.0538804	-2.12809	0.03333	0.100835	FALSE	NoSigChange
ATAC	LTR84a	LTR	ERVL	J1.TSA.vs.J1.DMSO	823.171	0.115925	0.0811878	1.42786	0.153331	0.259587	FALSE	NoSigChange
ATAC	LTR84b	LTR	ERVL	J1.TSA.vs.J1.DMSO	1249.38	0.125357	0.0630642	1.98776	0.0468383	0.122393	FALSE	NoSigChange
ATAC	LTR85a	LTR	Gypsy?	J1.TSA.vs.J1.DMSO	1367.37	0.07891	0.0658148	1.19897	0.23054	0.345251	FALSE	NoSigChange
ATAC	LTR85b	LTR	Gypsy?	J1.TSA.vs.J1.DMSO	844.266	-0.18336	0.0598992	-3.06114	0.00220495	0.0157613	TRUE	SigDecrease
ATAC	LTR85c	LTR	Gypsy?	J1.TSA.vs.J1.DMSO	722.674	0.106918	0.0661802	1.61556	0.106189	0.205458	FALSE	NoSigChange
ATAC	LTR86A1	LTR	ERVL	J1.TSA.vs.J1.DMSO	572.259	0.0207122	0.0747435	0.277111	0.781695	0.834096	FALSE	NoSigChange
ATAC	LTR86A2	LTR	ERVL	J1.TSA.vs.J1.DMSO	403.272	0.120805	0.0927442	1.30256	0.192727	0.306023	FALSE	NoSigChange
ATAC	LTR86B1	LTR	ERVL	J1.TSA.vs.J1.DMSO	295.016	0.0158893	0.10099	0.157335	0.87498	0.902451	FALSE	NoSigChange
ATAC	LTR86B2	LTR	ERVL	J1.TSA.vs.J1.DMSO	270.448	0.0853547	0.0935876	0.91203	0.361753	0.476169	FALSE	NoSigChange
ATAC	LTR86C	LTR	ERVL	J1.TSA.vs.J1.DMSO	585.426	0.0937951	0.074048	1.26668	0.20527	0.317862	FALSE	NoSigChange
ATAC	LTR87	LTR	ERVL?	J1.TSA.vs.J1.DMSO	1659.57	-0.0222577	0.0496594	-0.448207	0.654003	0.736836	FALSE	NoSigChange
ATAC	LTR88a	LTR	Gypsy?	J1.TSA.vs.J1.DMSO	507.081	-0.156716	0.0714479	-2.19343	0.0282764	0.0908576	FALSE	NoSigChange
ATAC	LTR88b	LTR	Gypsy?	J1.TSA.vs.J1.DMSO	1589.28	0.018072	0.0478164	0.377946	0.705471	0.773613	FALSE	NoSigChange
ATAC	LTR88c	LTR	Gypsy?	J1.TSA.vs.J1.DMSO	977.643	0.0457232	0.0495807	0.922198	0.356425	0.471568	FALSE	NoSigChange
ATAC	LTR89	LTR	ERVL?	J1.TSA.vs.J1.DMSO	878.606	0.104377	0.0747318	1.39668	0.162509	0.271821	FALSE	NoSigChange
ATAC	LTR9	LTR	ERV1	J1.TSA.vs.J1.DMSO	77.7889	-0.288839	0.169009	-1.70901	0.0874489	0.179563	FALSE	NoSigChange
ATAC	LTR90A	LTR	LTR	J1.TSA.vs.J1.DMSO	514.969	0.187972	0.0842717	2.23055	0.025711	0.0863664	FALSE	NoSigChange
ATAC	LTR90B	LTR	LTR	J1.TSA.vs.J1.DMSO	355.842	0.0843585	0.115679	0.729248	0.46585	0.578399	FALSE	NoSigChange
ATAC	LTR91	LTR	ERVL	J1.TSA.vs.J1.DMSO	342.985	0.22369	0.098682	2.26678	0.0234036	0.0817538	FALSE	NoSigChange
ATAC	LTR9A1	LTR	ERV1	J1.TSA.vs.J1.DMSO	47.4353	0.216799	0.191837	1.13012	0.258425	0.373253	FALSE	NoSigChange
ATAC	LTR9D	LTR	ERV1	J1.TSA.vs.J1.DMSO	43.9025	0.0792735	0.205442	0.385868	0.699594	0.769903	FALSE	NoSigChange
ATAC	LTRIS_Mm	LTR	ERV1	J1.TSA.vs.J1.DMSO	8674.68	0.187229	0.0717574	2.60919	0.00907562	0.0419543	TRUE	SigIncrease
ATAC	LTRIS_Mus	LTR	ERV1	J1.TSA.vs.J1.DMSO	14090.5	0.244931	0.0512033	4.7835	1.72273e-06	7.22138e-05	TRUE	SigIncrease
ATAC	LTRIS2	LTR	ERV1	J1.TSA.vs.J1.DMSO	50413.7	-0.193911	0.0763903	-2.53842	0.0111354	0.0482953	TRUE	SigDecrease
ATAC	LTRIS3	LTR	ERV1	J1.TSA.vs.J1.DMSO	3108.21	0.0148988	0.0610431	0.24407	0.807177	0.851822	FALSE	NoSigChange
ATAC	LTRIS4	LTR	ERV1	J1.TSA.vs.J1.DMSO	1440.84	0.246942	0.0563779	4.38013	1.18611e-05	0.000339164	TRUE	SigIncrease
ATAC	LTRIS4A	LTR	ERV1	J1.TSA.vs.J1.DMSO	3058.49	0.0497402	0.083073	0.598752	0.549338	0.651943	FALSE	NoSigChange
ATAC	LTRIS4B	LTR	ERV1	J1.TSA.vs.J1.DMSO	968.113	0.0847928	0.0643303	1.31808	0.187475	0.300896	FALSE	NoSigChange
ATAC	LTRIS5	LTR	ERV1	J1.TSA.vs.J1.DMSO	910.2	0.215895	0.061043	3.53677	0.000405058	0.00453195	TRUE	SigIncrease
ATAC	LTRIS6	LTR	ERV1	J1.TSA.vs.J1.DMSO	1410.29	0.208922	0.0488729	4.2748	1.91311e-05	0.000476427	TRUE	SigIncrease
ATAC	Lx	LINE	L1	J1.TSA.vs.J1.DMSO	398064	0.334871	0.0896737	3.73433	0.000188219	0.00264191	TRUE	SigIncrease
ATAC	Lx10	LINE	L1	J1.TSA.vs.J1.DMSO	67078.8	0.28999	0.118409	2.44906	0.014323	0.0585045	FALSE	NoSigChange
ATAC	Lx2	LINE	L1	J1.TSA.vs.J1.DMSO	285101	0.322338	0.0812071	3.96933	7.20749e-05	0.00123648	TRUE	SigIncrease
ATAC	Lx2A	LINE	L1	J1.TSA.vs.J1.DMSO	21198.1	0.321039	0.0865651	3.70865	0.000208368	0.00279045	TRUE	SigIncrease
ATAC	Lx2A1	LINE	L1	J1.TSA.vs.J1.DMSO	38947.4	0.350451	0.0761765	4.60052	4.21445e-06	0.000147889	TRUE	SigIncrease
ATAC	Lx2B	LINE	L1	J1.TSA.vs.J1.DMSO	95902.5	0.343083	0.0946725	3.6239	0.000290196	0.0035845	TRUE	SigIncrease
ATAC	Lx2B2	LINE	L1	J1.TSA.vs.J1.DMSO	168178	0.330157	0.0859931	3.83935	0.000123362	0.00188585	TRUE	SigIncrease
ATAC	Lx3_Mus	LINE	L1	J1.TSA.vs.J1.DMSO	211766	0.373021	0.0911236	4.09357	4.24782e-05	0.000826345	TRUE	SigIncrease
ATAC	Lx3A	LINE	L1	J1.TSA.vs.J1.DMSO	146581	0.407363	0.0871952	4.67185	2.98499e-06	0.000107182	TRUE	SigIncrease
ATAC	Lx3B	LINE	L1	J1.TSA.vs.J1.DMSO	90365.6	0.359325	0.0806137	4.45737	8.297e-06	0.00026144	TRUE	SigIncrease
ATAC	Lx3C	LINE	L1	J1.TSA.vs.J1.DMSO	103833	0.33783	0.0803425	4.20487	2.61229e-05	0.000601997	TRUE	SigIncrease
ATAC	Lx4A	LINE	L1	J1.TSA.vs.J1.DMSO	158226	0.328699	0.084263	3.90087	9.58465e-05	0.0015322	TRUE	SigIncrease
ATAC	Lx4B	LINE	L1	J1.TSA.vs.J1.DMSO	83111.9	0.278404	0.0752591	3.69927	0.000216218	0.00282916	TRUE	SigIncrease
ATAC	Lx5	LINE	L1	J1.TSA.vs.J1.DMSO	263076	0.284589	0.0743058	3.82997	0.000128157	0.00190263	TRUE	SigIncrease
ATAC	Lx5b	LINE	L1	J1.TSA.vs.J1.DMSO	107770	0.301511	0.0869786	3.46649	0.000527299	0.00557636	TRUE	SigIncrease
ATAC	Lx5c	LINE	L1	J1.TSA.vs.J1.DMSO	199626	0.269476	0.0782422	3.44413	0.000572908	0.00597682	TRUE	SigIncrease
ATAC	Lx6	LINE	L1	J1.TSA.vs.J1.DMSO	203100	0.300586	0.104217	2.88425	0.00392348	0.0235714	TRUE	SigIncrease
ATAC	Lx7	LINE	L1	J1.TSA.vs.J1.DMSO	343376	0.282361	0.10879	2.59546	0.0094464	0.0434084	TRUE	SigIncrease
ATAC	Lx8	LINE	L1	J1.TSA.vs.J1.DMSO	459700	0.205602	0.0750422	2.73982	0.00614726	0.0323938	TRUE	SigIncrease
ATAC	Lx8b	LINE	L1	J1.TSA.vs.J1.DMSO	197042	0.270117	0.106162	2.54438	0.0109471	0.0478817	TRUE	SigIncrease
ATAC	Lx9	LINE	L1	J1.TSA.vs.J1.DMSO	355371	0.277733	0.116638	2.38116	0.0172581	0.0663794	FALSE	NoSigChange
ATAC	MADE2	DNA	TcMar-Mariner	J1.TSA.vs.J1.DMSO	529.622	0.126649	0.112038	1.13041	0.258303	0.373253	FALSE	NoSigChange
ATAC	Mam_R4	LINE	Dong-R4	J1.TSA.vs.J1.DMSO	632.298	0.182191	0.132289	1.37722	0.168444	0.279352	FALSE	NoSigChange
ATAC	MamGyp-int	LTR	Gypsy	J1.TSA.vs.J1.DMSO	451.32	-0.111428	0.0855691	-1.30219	0.19285	0.306023	FALSE	NoSigChange
ATAC	MamGypLTR1a	LTR	Gypsy	J1.TSA.vs.J1.DMSO	874.034	-0.00545123	0.0652973	-0.0834832	0.933467	0.947583	FALSE	NoSigChange
ATAC	MamGypLTR1b	LTR	Gypsy	J1.TSA.vs.J1.DMSO	1074.93	-0.0537583	0.0557932	-0.963527	0.335283	0.452515	FALSE	NoSigChange
ATAC	MamGypLTR1c	LTR	Gypsy	J1.TSA.vs.J1.DMSO	877.902	0.105287	0.0674285	1.56146	0.118416	0.219489	FALSE	NoSigChange
ATAC	MamGypLTR1d	LTR	Gypsy	J1.TSA.vs.J1.DMSO	669.57	0.243349	0.0683936	3.55807	0.000373593	0.00428893	TRUE	SigIncrease
ATAC	MamGypLTR2b	LTR	Gypsy	J1.TSA.vs.J1.DMSO	527.748	0.0526487	0.0791539	0.665143	0.505959	0.615604	FALSE	NoSigChange
ATAC	MamGypLTR2c	LTR	Gypsy	J1.TSA.vs.J1.DMSO	638.052	0.10002	0.0776328	1.28837	0.197618	0.311349	FALSE	NoSigChange
ATAC	MamGypLTR3	LTR	Gypsy	J1.TSA.vs.J1.DMSO	1325.64	-0.100689	0.0928444	-1.08449	0.278147	0.394775	FALSE	NoSigChange
ATAC	MamGypLTR3a	LTR	Gypsy	J1.TSA.vs.J1.DMSO	1808.42	-0.240462	0.0622395	-3.8635	0.000111773	0.00174321	TRUE	SigDecrease
ATAC	MamRep1151	LTR?	LTR?	J1.TSA.vs.J1.DMSO	984.237	0.310376	0.167206	1.85625	0.0634186	0.145715	FALSE	NoSigChange
ATAC	MamRep1161	DNA	TcMar	J1.TSA.vs.J1.DMSO	126.955	-0.126286	0.175043	-0.721455	0.470629	0.582253	FALSE	NoSigChange
ATAC	MamRep137	DNA	TcMar?	J1.TSA.vs.J1.DMSO	2181.49	0.016626	0.052571	0.316258	0.751807	0.812309	FALSE	NoSigChange
ATAC	MamRep1527	LTR	LTR	J1.TSA.vs.J1.DMSO	2399	0.0990578	0.0682012	1.45243	0.146381	0.251848	FALSE	NoSigChange
ATAC	MamRep1879	DNA	hAT-Tip100?	J1.TSA.vs.J1.DMSO	886.869	-0.213952	0.07351	-2.91051	0.00360837	0.0221965	TRUE	SigDecrease
ATAC	MamRep1894	DNA	hAT	J1.TSA.vs.J1.DMSO	158.048	-0.007809	0.108222	-0.0721573	0.942477	0.954715	FALSE	NoSigChange
ATAC	MamRep38	DNA	hAT	J1.TSA.vs.J1.DMSO	1285.82	0.0780781	0.0501714	1.55623	0.119654	0.220304	FALSE	NoSigChange
ATAC	MamRep4096	DNA	hAT?	J1.TSA.vs.J1.DMSO	1053.27	0.0379273	0.0706013	0.537204	0.591127	0.685725	FALSE	NoSigChange
ATAC	MamRep434	DNA	TcMar-Tigger	J1.TSA.vs.J1.DMSO	2592.79	-0.0383054	0.0909436	-0.4212	0.673609	0.752571	FALSE	NoSigChange
ATAC	MamRep488	DNA	hAT-Tip100	J1.TSA.vs.J1.DMSO	293.867	-0.137195	0.124788	-1.09942	0.271584	0.387325	FALSE	NoSigChange
ATAC	MamRep564	Unknown	Unknown	J1.TSA.vs.J1.DMSO	816.236	-0.132954	0.0717172	-1.85387	0.0637578	0.145715	FALSE	NoSigChange
ATAC	MamRep605	LTR?	LTR?	J1.TSA.vs.J1.DMSO	4150.53	-0.0543136	0.0514679	-1.05529	0.291292	0.406423	FALSE	NoSigChange
ATAC	MamSINE1	SINE	tRNA	J1.TSA.vs.J1.DMSO	2937.51	0.0123926	0.0309443	0.40048	0.688803	0.762084	FALSE	NoSigChange
ATAC	MamTip1	DNA	hAT-Tip100	J1.TSA.vs.J1.DMSO	368.224	0.0286404	0.0882331	0.3246	0.745484	0.807738	FALSE	NoSigChange
ATAC	MamTip2	DNA	hAT-Tip100	J1.TSA.vs.J1.DMSO	4899.91	-0.105455	0.034488	-3.05773	0.00223021	0.0158684	TRUE	SigDecrease
ATAC	MamTip3	DNA	hAT-Tip100	J1.TSA.vs.J1.DMSO	1335.35	-0.135864	0.0451244	-3.01088	0.00260493	0.0176404	TRUE	SigDecrease
ATAC	MARINER1_EC	DNA	TcMar-Tigger	J1.TSA.vs.J1.DMSO	8.51377	0.172749	0.559161	0.308944	0.757364	0.81546	FALSE	NoSigChange
ATAC	MARNA	DNA	TcMar-Mariner	J1.TSA.vs.J1.DMSO	3058.93	0.0410392	0.0645885	0.635395	0.525171	0.63128	FALSE	NoSigChange
ATAC	MER101B	LTR	ERV1	J1.TSA.vs.J1.DMSO	350.625	-0.319444	0.12579	-2.5395	0.0111012	0.0482823	TRUE	SigDecrease
ATAC	MER102a	DNA	hAT-Charlie	J1.TSA.vs.J1.DMSO	2301	0.0986549	0.0695241	1.419	0.155898	0.26278	FALSE	NoSigChange
ATAC	MER102b	DNA	hAT-Charlie	J1.TSA.vs.J1.DMSO	3897.99	0.00297162	0.0456731	0.0650627	0.948124	0.957425	FALSE	NoSigChange
ATAC	MER102c	DNA	hAT-Charlie	J1.TSA.vs.J1.DMSO	2430.25	0.0111276	0.0493741	0.225374	0.821688	0.858381	FALSE	NoSigChange
ATAC	MER103C	DNA	hAT-Charlie	J1.TSA.vs.J1.DMSO	5318.71	0.0116716	0.0667987	0.174728	0.861294	0.89191	FALSE	NoSigChange
ATAC	MER104	DNA	TcMar-Tc2	J1.TSA.vs.J1.DMSO	1058.99	0.0920029	0.0960972	0.957395	0.338368	0.455484	FALSE	NoSigChange
ATAC	MER105	DNA	DNA	J1.TSA.vs.J1.DMSO	840.945	0.00686019	0.067368	0.101832	0.91889	0.938338	FALSE	NoSigChange
ATAC	MER106A	DNA	hAT-Charlie	J1.TSA.vs.J1.DMSO	599.27	0.100056	0.0775631	1.28999	0.197053	0.310776	FALSE	NoSigChange
ATAC	MER106B	DNA	hAT-Charlie	J1.TSA.vs.J1.DMSO	873.308	0.333104	0.103713	3.21178	0.00131916	0.0110097	TRUE	SigIncrease
ATAC	MER110	LTR	ERV1	J1.TSA.vs.J1.DMSO	845.867	0.165634	0.0816467	2.02867	0.042492	0.11571	FALSE	NoSigChange
ATAC	MER110-int	LTR	ERV1	J1.TSA.vs.J1.DMSO	194.82	0.213833	0.137831	1.55142	0.120801	0.220735	FALSE	NoSigChange
ATAC	MER110A	LTR	ERV1	J1.TSA.vs.J1.DMSO	1027.12	0.159156	0.103937	1.53128	0.125701	0.227263	FALSE	NoSigChange
ATAC	MER112	DNA	hAT-Charlie	J1.TSA.vs.J1.DMSO	1456.68	0.11762	0.082281	1.4295	0.152861	0.259076	FALSE	NoSigChange
ATAC	MER113	DNA	hAT-Charlie	J1.TSA.vs.J1.DMSO	3642.01	0.0569893	0.0784247	0.726675	0.467425	0.579682	FALSE	NoSigChange
ATAC	MER113A	DNA	hAT-Charlie	J1.TSA.vs.J1.DMSO	640.234	0.154035	0.0899696	1.71208	0.0868824	0.17934	FALSE	NoSigChange
ATAC	MER113B	DNA	hAT-Charlie	J1.TSA.vs.J1.DMSO	294.222	0.13333	0.136499	0.976784	0.328676	0.447116	FALSE	NoSigChange
ATAC	MER115	DNA	hAT-Tip100	J1.TSA.vs.J1.DMSO	3708.1	0.0749635	0.048276	1.55281	0.120468	0.220735	FALSE	NoSigChange
ATAC	MER117	DNA	hAT-Charlie	J1.TSA.vs.J1.DMSO	4525.37	0.0344972	0.0504363	0.683975	0.493991	0.604855	FALSE	NoSigChange
ATAC	MER119	DNA	hAT-Charlie	J1.TSA.vs.J1.DMSO	2958.75	0.103144	0.0583277	1.76835	0.0770022	0.166049	FALSE	NoSigChange
ATAC	MER121	DNA	TcMar?	J1.TSA.vs.J1.DMSO	3154.38	0.042528	0.0733764	0.579587	0.562193	0.664137	FALSE	NoSigChange
ATAC	MER123	DNA	DNA	J1.TSA.vs.J1.DMSO	135.202	0.0394941	0.161147	0.245081	0.806393	0.851622	FALSE	NoSigChange
ATAC	MER124	DNA?	DNA?	J1.TSA.vs.J1.DMSO	1254.73	0.0409675	0.0858012	0.47747	0.633028	0.721979	FALSE	NoSigChange
ATAC	MER125	DNA	DNA	J1.TSA.vs.J1.DMSO	415.471	0.0753118	0.121351	0.620612	0.534855	0.639177	FALSE	NoSigChange
ATAC	MER126	DNA	DNA	J1.TSA.vs.J1.DMSO	930.622	-0.429575	0.057679	-7.44768	9.49983e-14	4.88925e-11	TRUE	SigDecrease
ATAC	MER127	DNA	TcMar-Tigger	J1.TSA.vs.J1.DMSO	561.884	0.119973	0.131507	0.912291	0.361616	0.476169	FALSE	NoSigChange
ATAC	MER129	LTR?	LTR?	J1.TSA.vs.J1.DMSO	516.788	-0.176646	0.0849263	-2.07999	0.0375265	0.107148	FALSE	NoSigChange
ATAC	MER130	Unknown	Unknown	J1.TSA.vs.J1.DMSO	628.307	0.0415802	0.0806999	0.515245	0.606382	0.699219	FALSE	NoSigChange
ATAC	MER131	SINE?	SINE?	J1.TSA.vs.J1.DMSO	1013.66	0.027697	0.0934268	0.296456	0.766882	0.822839	FALSE	NoSigChange
ATAC	MER132	DNA	TcMar-Pogo	J1.TSA.vs.J1.DMSO	111.622	0.0393259	0.160305	0.245319	0.80621	0.851622	FALSE	NoSigChange
ATAC	MER133A	DNA?	DNA?	J1.TSA.vs.J1.DMSO	161.577	0.0398501	0.120832	0.329798	0.741553	0.804043	FALSE	NoSigChange
ATAC	MER133B	DNA?	DNA?	J1.TSA.vs.J1.DMSO	70.9394	0.13202	0.238513	0.553512	0.579913	0.674744	FALSE	NoSigChange
ATAC	MER134	DNA?	DNA?	J1.TSA.vs.J1.DMSO	173.886	0.0744432	0.157233	0.473457	0.635887	0.724049	FALSE	NoSigChange
ATAC	MER135	DNA	DNA	J1.TSA.vs.J1.DMSO	1386.37	0.119144	0.0678769	1.7553	0.0792082	0.168919	FALSE	NoSigChange
ATAC	MER136	DNA	DNA	J1.TSA.vs.J1.DMSO	115.931	0.0806276	0.201178	0.400778	0.688583	0.762084	FALSE	NoSigChange
ATAC	MER2	DNA	TcMar-Tigger	J1.TSA.vs.J1.DMSO	50517	0.16914	0.0856324	1.97519	0.0482466	0.124355	FALSE	NoSigChange
ATAC	MER20	DNA	hAT-Charlie	J1.TSA.vs.J1.DMSO	39039.8	-0.00254778	0.0383063	-0.0665108	0.946971	0.956887	FALSE	NoSigChange
ATAC	MER20B	DNA	hAT-Charlie	J1.TSA.vs.J1.DMSO	5200.25	0.0186191	0.0598744	0.310969	0.755824	0.81437	FALSE	NoSigChange
ATAC	MER21-int	LTR	ERVL	J1.TSA.vs.J1.DMSO	667.347	0.0185658	0.0762731	0.243413	0.807686	0.851822	FALSE	NoSigChange
ATAC	MER21B	LTR	ERVL	J1.TSA.vs.J1.DMSO	15538.5	0.00942087	0.0345	0.273069	0.7848	0.835677	FALSE	NoSigChange
ATAC	MER21C	LTR	ERVL	J1.TSA.vs.J1.DMSO	21907.1	0.0170996	0.0410735	0.416317	0.677178	0.754601	FALSE	NoSigChange
ATAC	MER2B	DNA	TcMar-Tigger	J1.TSA.vs.J1.DMSO	4439.11	0.146557	0.0742118	1.97485	0.0482856	0.124355	FALSE	NoSigChange
ATAC	MER3	DNA	hAT-Charlie	J1.TSA.vs.J1.DMSO	14771.6	0.0684965	0.0581639	1.17765	0.238937	0.352695	FALSE	NoSigChange
ATAC	MER31-int	LTR	ERV1	J1.TSA.vs.J1.DMSO	1061.91	0.145997	0.0577124	2.52973	0.0114151	0.0492317	TRUE	SigIncrease
ATAC	MER31A	LTR	ERV1	J1.TSA.vs.J1.DMSO	6578.62	0.0373238	0.0332128	1.12378	0.261106	0.376006	FALSE	NoSigChange
ATAC	MER31B	LTR	ERV1	J1.TSA.vs.J1.DMSO	4394.32	0.100684	0.0450946	2.23273	0.0255667	0.0861898	FALSE	NoSigChange
ATAC	MER33	DNA	hAT-Charlie	J1.TSA.vs.J1.DMSO	11953.7	0.154177	0.0989877	1.55754	0.119342	0.220149	FALSE	NoSigChange
ATAC	MER34	LTR	ERV1	J1.TSA.vs.J1.DMSO	4162.2	0.0913134	0.0660318	1.38287	0.166705	0.277413	FALSE	NoSigChange
ATAC	MER34-int	LTR	ERV1	J1.TSA.vs.J1.DMSO	540.505	0.0473758	0.0853455	0.555107	0.578822	0.674491	FALSE	NoSigChange
ATAC	MER34A	LTR	ERV1	J1.TSA.vs.J1.DMSO	4396.82	0.0563084	0.0595606	0.945397	0.344456	0.460468	FALSE	NoSigChange
ATAC	MER34A1	LTR	ERV1	J1.TSA.vs.J1.DMSO	3656.83	0.140814	0.0547932	2.56993	0.010172	0.0454229	TRUE	SigIncrease
ATAC	MER34B-int	LTR	ERV1	J1.TSA.vs.J1.DMSO	346.945	0.122327	0.140047	0.87347	0.382407	0.497419	FALSE	NoSigChange
ATAC	MER44A	DNA	TcMar-Tigger	J1.TSA.vs.J1.DMSO	3389.11	0.244977	0.111468	2.19774	0.0279678	0.090151	FALSE	NoSigChange
ATAC	MER44B	DNA	TcMar-Tigger	J1.TSA.vs.J1.DMSO	9475.69	0.164368	0.0838099	1.9612	0.0498557	0.126816	FALSE	NoSigChange
ATAC	MER44C	DNA	TcMar-Tigger	J1.TSA.vs.J1.DMSO	1438.04	0.135215	0.0856578	1.57855	0.11444	0.214696	FALSE	NoSigChange
ATAC	MER44D	DNA	TcMar-Tigger	J1.TSA.vs.J1.DMSO	4656.02	0.171582	0.0893147	1.9211	0.0547191	0.134013	FALSE	NoSigChange
ATAC	MER45A	DNA	hAT-Tip100	J1.TSA.vs.J1.DMSO	4232.82	0.0574777	0.0440819	1.30388	0.192274	0.305737	FALSE	NoSigChange
ATAC	MER45B	DNA	hAT-Tip100	J1.TSA.vs.J1.DMSO	4745.94	0.137291	0.0657322	2.08864	0.0367402	0.106846	FALSE	NoSigChange
ATAC	MER45C	DNA	hAT-Tip100	J1.TSA.vs.J1.DMSO	2044	0.249461	0.0712073	3.50331	0.000459514	0.00492702	TRUE	SigIncrease
ATAC	MER45R	DNA	hAT-Tip100	J1.TSA.vs.J1.DMSO	2312.64	0.0335936	0.0435209	0.771897	0.440175	0.553445	FALSE	NoSigChange
ATAC	MER46C	DNA	TcMar-Tigger	J1.TSA.vs.J1.DMSO	3360.41	0.116579	0.0881979	1.32179	0.18624	0.299535	FALSE	NoSigChange
ATAC	MER47A	DNA	TcMar-Tigger	J1.TSA.vs.J1.DMSO	772.323	0.177455	0.0948196	1.8715	0.0612762	0.143132	FALSE	NoSigChange
ATAC	MER47B	DNA	TcMar-Tigger	J1.TSA.vs.J1.DMSO	3334.69	0.11132	0.077529	1.43586	0.151043	0.256564	FALSE	NoSigChange
ATAC	MER47C	DNA	TcMar-Tigger	J1.TSA.vs.J1.DMSO	50.4426	0.17172	0.184591	0.930271	0.352231	0.46722	FALSE	NoSigChange
ATAC	MER49	LTR	ERV1	J1.TSA.vs.J1.DMSO	23.6202	0.162771	0.266105	0.611677	0.540752	0.645723	FALSE	NoSigChange
ATAC	MER4B-int	LTR	ERV1	J1.TSA.vs.J1.DMSO	264.991	-0.0140365	0.093726	-0.149761	0.880953	0.906795	FALSE	NoSigChange
ATAC	MER4CL34	LTR	ERV1	J1.TSA.vs.J1.DMSO	18.0091	0.211535	0.346729	0.610088	0.541803	0.646479	FALSE	NoSigChange
ATAC	MER50	LTR	ERV1	J1.TSA.vs.J1.DMSO	85.3041	-0.182755	0.154824	-1.18041	0.237839	0.352083	FALSE	NoSigChange
ATAC	MER50-int	LTR	ERV1	J1.TSA.vs.J1.DMSO	83.3827	0.0563346	0.13946	0.403947	0.686252	0.761318	FALSE	NoSigChange
ATAC	MER50B	LTR	ERV1	J1.TSA.vs.J1.DMSO	55.9715	-0.0388682	0.167264	-0.232376	0.816246	0.856753	FALSE	NoSigChange
ATAC	MER51-int	LTR	ERV1	J1.TSA.vs.J1.DMSO	43.923	-0.677804	0.210418	-3.22123	0.00127643	0.0107694	TRUE	SigDecrease
ATAC	MER52-int	LTR	ERV1	J1.TSA.vs.J1.DMSO	1550.7	0.139867	0.0693023	2.01821	0.043569	0.117606	FALSE	NoSigChange
ATAC	MER53	DNA	hAT	J1.TSA.vs.J1.DMSO	6121.21	0.131525	0.0784422	1.67671	0.0935993	0.187929	FALSE	NoSigChange
ATAC	MER54A	LTR	ERVL	J1.TSA.vs.J1.DMSO	2554.23	0.0869404	0.0463351	1.87634	0.0606086	0.142218	FALSE	NoSigChange
ATAC	MER54B	LTR	ERVL	J1.TSA.vs.J1.DMSO	1253.8	-0.0098626	0.0722876	-0.136436	0.891477	0.916405	FALSE	NoSigChange
ATAC	MER57-int	LTR	ERV1	J1.TSA.vs.J1.DMSO	1092.82	-0.0146632	0.0608815	-0.240848	0.809673	0.852439	FALSE	NoSigChange
ATAC	MER57C2	LTR	ERV1	J1.TSA.vs.J1.DMSO	3680.71	0.00660648	0.042591	0.155115	0.876731	0.90305	FALSE	NoSigChange
ATAC	MER57D	LTR	ERV1	J1.TSA.vs.J1.DMSO	2461.72	0.109219	0.0566016	1.92961	0.0536557	0.132418	FALSE	NoSigChange
ATAC	MER57E1	LTR	ERV1	J1.TSA.vs.J1.DMSO	1280.11	0.142077	0.0815531	1.74214	0.0814845	0.171874	FALSE	NoSigChange
ATAC	MER57E2	LTR	ERV1	J1.TSA.vs.J1.DMSO	348.08	0.018191	0.0789955	0.230278	0.817875	0.857386	FALSE	NoSigChange
ATAC	MER57E3	LTR	ERV1	J1.TSA.vs.J1.DMSO	21.3685	-0.302607	0.316011	-0.957584	0.338273	0.455484	FALSE	NoSigChange
ATAC	MER58A	DNA	hAT-Charlie	J1.TSA.vs.J1.DMSO	18949	0.0818971	0.0700634	1.1689	0.242444	0.356508	FALSE	NoSigChange
ATAC	MER58B	DNA	hAT-Charlie	J1.TSA.vs.J1.DMSO	14501.9	0.107601	0.0727115	1.47984	0.138917	0.24457	FALSE	NoSigChange
ATAC	MER58C	DNA	hAT-Charlie	J1.TSA.vs.J1.DMSO	1613.45	0.0920145	0.0892739	1.0307	0.302682	0.417269	FALSE	NoSigChange
ATAC	MER58D	DNA	hAT-Charlie	J1.TSA.vs.J1.DMSO	1141.21	0.123268	0.08672	1.42145	0.155185	0.261864	FALSE	NoSigChange
ATAC	MER5A	DNA	hAT-Charlie	J1.TSA.vs.J1.DMSO	48863.9	-0.00128155	0.0292191	-0.0438599	0.965016	0.971922	FALSE	NoSigChange
ATAC	MER5A1	DNA	hAT-Charlie	J1.TSA.vs.J1.DMSO	21529.1	-0.0291098	0.032964	-0.883077	0.377195	0.491548	FALSE	NoSigChange
ATAC	MER5B	DNA	hAT-Charlie	J1.TSA.vs.J1.DMSO	25583.5	0.0140467	0.0386215	0.363702	0.71608	0.783578	FALSE	NoSigChange
ATAC	MER5C	DNA	hAT-Charlie	J1.TSA.vs.J1.DMSO	972.14	0.202165	0.109353	1.84873	0.0644969	0.146446	FALSE	NoSigChange
ATAC	MER5C1	DNA	hAT-Charlie	J1.TSA.vs.J1.DMSO	314.423	0.149763	0.0824695	1.81598	0.0693733	0.153916	FALSE	NoSigChange
ATAC	MER63A	DNA	hAT-Blackjack	J1.TSA.vs.J1.DMSO	3603.41	0.0840589	0.0626326	1.3421	0.179565	0.290617	FALSE	NoSigChange
ATAC	MER63B	DNA	hAT-Blackjack	J1.TSA.vs.J1.DMSO	3735.99	0.138524	0.0712658	1.94376	0.0519241	0.128906	FALSE	NoSigChange
ATAC	MER63C	DNA	hAT-Blackjack	J1.TSA.vs.J1.DMSO	2785.63	0.190063	0.100476	1.89163	0.0585397	0.139699	FALSE	NoSigChange
ATAC	MER63D	DNA	hAT-Blackjack	J1.TSA.vs.J1.DMSO	4987.48	0.137103	0.0861172	1.59205	0.111372	0.212027	FALSE	NoSigChange
ATAC	MER65-int	LTR	ERV1	J1.TSA.vs.J1.DMSO	181.378	0.125755	0.100946	1.24576	0.212851	0.324899	FALSE	NoSigChange
ATAC	MER65D	LTR	ERV1	J1.TSA.vs.J1.DMSO	630.294	0.0575466	0.0709982	0.810536	0.417632	0.529847	FALSE	NoSigChange
ATAC	MER66-int	LTR	ERV1	J1.TSA.vs.J1.DMSO	101.405	0.153261	0.133997	1.14376	0.252722	0.368115	FALSE	NoSigChange
ATAC	MER66A	LTR	ERV1	J1.TSA.vs.J1.DMSO	13.833	0.307527	0.384054	0.800739	0.423283	0.536135	FALSE	NoSigChange
ATAC	MER66B	LTR	ERV1	J1.TSA.vs.J1.DMSO	50.8149	-0.197302	0.249417	-0.791054	0.428912	0.541046	FALSE	NoSigChange
ATAC	MER66C	LTR	ERV1	J1.TSA.vs.J1.DMSO	87.4781	-0.0417422	0.168225	-0.248132	0.804032	0.850291	FALSE	NoSigChange
ATAC	MER67A	LTR	ERV1	J1.TSA.vs.J1.DMSO	1751.38	0.103781	0.0435669	2.38212	0.0172135	0.0663794	FALSE	NoSigChange
ATAC	MER67B	LTR	ERV1	J1.TSA.vs.J1.DMSO	1905.68	-0.0306736	0.0458359	-0.669203	0.503366	0.613415	FALSE	NoSigChange
ATAC	MER67C	LTR	ERV1	J1.TSA.vs.J1.DMSO	4719.85	0.0380539	0.0852256	0.446508	0.65523	0.736836	FALSE	NoSigChange
ATAC	MER67D	LTR	ERV1	J1.TSA.vs.J1.DMSO	3325.95	0.0529753	0.106378	0.497992	0.61849	0.708945	FALSE	NoSigChange
ATAC	MER68	LTR	ERVL	J1.TSA.vs.J1.DMSO	6087.66	0.0492105	0.0480312	1.02455	0.305574	0.419789	FALSE	NoSigChange
ATAC	MER68-int	LTR	ERVL	J1.TSA.vs.J1.DMSO	515.136	0.0760945	0.0838736	0.907251	0.364274	0.477803	FALSE	NoSigChange
ATAC	MER68B	LTR	ERVL	J1.TSA.vs.J1.DMSO	1936.38	0.0491447	0.0522035	0.941407	0.346496	0.462394	FALSE	NoSigChange
ATAC	MER68C	LTR	ERVL	J1.TSA.vs.J1.DMSO	353.359	0.14163	0.0881436	1.60681	0.108097	0.207299	FALSE	NoSigChange
ATAC	MER70-int	LTR	ERVL	J1.TSA.vs.J1.DMSO	611.951	0.31697	0.0855035	3.7071	0.000209645	0.00279045	TRUE	SigIncrease
ATAC	MER70A	LTR	ERVL	J1.TSA.vs.J1.DMSO	1669.41	0.17428	0.0628826	2.77152	0.00557961	0.0304414	TRUE	SigIncrease
ATAC	MER70B	LTR	ERVL	J1.TSA.vs.J1.DMSO	2177.2	0.153546	0.0620455	2.47473	0.0133338	0.0551942	FALSE	NoSigChange
ATAC	MER72	LTR	ERV1	J1.TSA.vs.J1.DMSO	41.1191	0.653615	0.208601	3.13332	0.0017284	0.0132112	TRUE	SigIncrease
ATAC	MER72B	LTR	ERV1	J1.TSA.vs.J1.DMSO	269.874	0.222028	0.111438	1.99239	0.0463278	0.12165	FALSE	NoSigChange
ATAC	MER73	LTR	ERVL	J1.TSA.vs.J1.DMSO	1011.03	0.140132	0.0820581	1.70772	0.0876881	0.179563	FALSE	NoSigChange
ATAC	MER74A	LTR	ERVL	J1.TSA.vs.J1.DMSO	7568.34	-0.0441421	0.0415071	-1.06348	0.287564	0.402172	FALSE	NoSigChange
ATAC	MER74B	LTR	ERVL	J1.TSA.vs.J1.DMSO	3220.52	0.0345193	0.0438085	0.787959	0.430721	0.542884	FALSE	NoSigChange
ATAC	MER74C	LTR	ERVL	J1.TSA.vs.J1.DMSO	894.894	0.172617	0.0593985	2.90609	0.00365978	0.0222468	TRUE	SigIncrease
ATAC	MER76	LTR	ERVL	J1.TSA.vs.J1.DMSO	2261.45	0.087488	0.0514055	1.70192	0.0887707	0.181059	FALSE	NoSigChange
ATAC	MER76-int	LTR	ERVL	J1.TSA.vs.J1.DMSO	113.001	0.0174537	0.13508	0.12921	0.897191	0.921053	FALSE	NoSigChange
ATAC	MER77	LTR	ERVL	J1.TSA.vs.J1.DMSO	5173.38	0.0860157	0.0516572	1.66513	0.0958877	0.192024	FALSE	NoSigChange
ATAC	MER77B	LTR	ERVL	J1.TSA.vs.J1.DMSO	4324.58	0.0290795	0.058244	0.499269	0.61759	0.708927	FALSE	NoSigChange
ATAC	MER81	DNA	hAT-Blackjack	J1.TSA.vs.J1.DMSO	2500.56	0.0342396	0.061389	0.557747	0.577017	0.673405	FALSE	NoSigChange
ATAC	MER83B-int	LTR	ERV1	J1.TSA.vs.J1.DMSO	29.9847	0.245558	0.248545	0.987983	0.323161	0.440661	FALSE	NoSigChange
ATAC	MER87	LTR	ERV1	J1.TSA.vs.J1.DMSO	212.29	0.106866	0.117654	0.90831	0.363715	0.477803	FALSE	NoSigChange
ATAC	MER88	LTR	ERVL	J1.TSA.vs.J1.DMSO	597.109	-0.164148	0.0699549	-2.34648	0.0189518	0.0705741	FALSE	NoSigChange
ATAC	MER89	LTR	ERV1	J1.TSA.vs.J1.DMSO	5341.65	0.0736807	0.0467891	1.57474	0.115316	0.215555	FALSE	NoSigChange
ATAC	MER89-int	LTR	ERV1	J1.TSA.vs.J1.DMSO	651.814	0.292659	0.0985407	2.96993	0.00297871	0.0195708	TRUE	SigIncrease
ATAC	MER90	LTR	ERV1	J1.TSA.vs.J1.DMSO	1834.04	0.125282	0.077091	1.62512	0.104136	0.203561	FALSE	NoSigChange
ATAC	MER90a	LTR	ERV1	J1.TSA.vs.J1.DMSO	4492.94	0.177225	0.0693918	2.55398	0.01065	0.0471164	TRUE	SigIncrease
ATAC	MER91A	DNA	hAT-Tip100	J1.TSA.vs.J1.DMSO	2611.24	-0.0504733	0.0584743	-0.86317	0.388044	0.501792	FALSE	NoSigChange
ATAC	MER91B	DNA	hAT-Tip100	J1.TSA.vs.J1.DMSO	1981.3	-0.188463	0.0632797	-2.97826	0.00289891	0.0192297	TRUE	SigDecrease
ATAC	MER91C	DNA	hAT-Tip100	J1.TSA.vs.J1.DMSO	778.857	-0.0401121	0.0667633	-0.60081	0.547966	0.650816	FALSE	NoSigChange
ATAC	MER92-int	LTR	ERV1	J1.TSA.vs.J1.DMSO	1583.84	0.228824	0.111398	2.05412	0.0399641	0.110979	FALSE	NoSigChange
ATAC	MER92A	LTR	ERV1	J1.TSA.vs.J1.DMSO	222.217	0.0950299	0.10314	0.921364	0.35686	0.47174	FALSE	NoSigChange
ATAC	MER92B	LTR	ERV1	J1.TSA.vs.J1.DMSO	2167.53	0.0635791	0.0485046	1.31079	0.18993	0.30326	FALSE	NoSigChange
ATAC	MER92C	LTR	ERV1	J1.TSA.vs.J1.DMSO	509.831	0.0649456	0.0681694	0.952709	0.340737	0.457875	FALSE	NoSigChange
ATAC	MER92D	LTR	ERV1	J1.TSA.vs.J1.DMSO	368.888	0.172782	0.0982186	1.75915	0.0785513	0.168078	FALSE	NoSigChange
ATAC	MER94	DNA	hAT-Blackjack	J1.TSA.vs.J1.DMSO	1972.83	0.0872839	0.0743825	1.17345	0.240616	0.354158	FALSE	NoSigChange
ATAC	MER94B	DNA	hAT-Blackjack	J1.TSA.vs.J1.DMSO	342.049	-0.0642531	0.099871	-0.643361	0.51999	0.627237	FALSE	NoSigChange
ATAC	MER95	LTR	ERV1	J1.TSA.vs.J1.DMSO	313.846	0.278129	0.133555	2.0825	0.0372965	0.107148	FALSE	NoSigChange
ATAC	MER96	DNA	hAT-Tip100	J1.TSA.vs.J1.DMSO	678.782	-0.0867177	0.0728343	-1.19062	0.233805	0.347779	FALSE	NoSigChange
ATAC	MER96B	DNA	hAT	J1.TSA.vs.J1.DMSO	1859.58	0.177724	0.0812816	2.18652	0.0287776	0.0916136	FALSE	NoSigChange
ATAC	MER97a	DNA	hAT-Tip100	J1.TSA.vs.J1.DMSO	349.888	0.173897	0.114954	1.51276	0.130342	0.232925	FALSE	NoSigChange
ATAC	MER97b	DNA	hAT-Tip100	J1.TSA.vs.J1.DMSO	327.296	0.177653	0.129657	1.37017	0.170634	0.281774	FALSE	NoSigChange
ATAC	MER97c	DNA	hAT-Tip100	J1.TSA.vs.J1.DMSO	390.732	0.171443	0.116422	1.4726	0.140859	0.246583	FALSE	NoSigChange
ATAC	MER97d	DNA	hAT-Tip100	J1.TSA.vs.J1.DMSO	122.357	0.377019	0.187224	2.01373	0.0440381	0.118046	FALSE	NoSigChange
ATAC	MER99	DNA	hAT?	J1.TSA.vs.J1.DMSO	967.897	0.206103	0.119171	1.72947	0.0837245	0.174179	FALSE	NoSigChange
ATAC	MERV1_I-int	LTR	ERV1	J1.TSA.vs.J1.DMSO	28078.1	0.236642	0.0558175	4.23956	2.2396e-05	0.000531992	TRUE	SigIncrease
ATAC	MERV1_LTR	LTR	ERV1	J1.TSA.vs.J1.DMSO	8309.51	0.0796109	0.0699407	1.13826	0.255011	0.370053	FALSE	NoSigChange
ATAC	MERVK26-int	LTR	ERVK	J1.TSA.vs.J1.DMSO	17872.7	0.152147	0.0440805	3.45156	0.000557347	0.00585404	TRUE	SigIncrease
ATAC	MERVL-int	LTR	ERVL	J1.TSA.vs.J1.DMSO	126247	0.358572	0.112832	3.17793	0.00148328	0.0121174	TRUE	SigIncrease
ATAC	MERVL_2A-int	LTR	ERVL	J1.TSA.vs.J1.DMSO	48201.5	0.179729	0.0757462	2.37278	0.017655	0.0674735	FALSE	NoSigChange
ATAC	MERX	DNA	TcMar-Tigger	J1.TSA.vs.J1.DMSO	270.931	0.298305	0.142131	2.0988	0.0358343	0.105588	FALSE	NoSigChange
ATAC	MIR	SINE	MIR	J1.TSA.vs.J1.DMSO	207735	0.0384802	0.0448727	0.857542	0.391146	0.504114	FALSE	NoSigChange
ATAC	MIR3	SINE	MIR	J1.TSA.vs.J1.DMSO	89958.6	-0.0536703	0.0513941	-1.04429	0.296352	0.410239	FALSE	NoSigChange
ATAC	MIRb	SINE	MIR	J1.TSA.vs.J1.DMSO	240386	0.00686728	0.0405252	0.169457	0.865437	0.894401	FALSE	NoSigChange
ATAC	MIRc	SINE	MIR	J1.TSA.vs.J1.DMSO	123140	-0.0281469	0.04499	-0.625627	0.531559	0.637127	FALSE	NoSigChange
ATAC	MLT-int	LTR	ERVL-MaLR	J1.TSA.vs.J1.DMSO	7258.15	0.157022	0.0615412	2.55149	0.0107263	0.0473184	TRUE	SigIncrease
ATAC	MLT1-int	LTR	ERVL-MaLR	J1.TSA.vs.J1.DMSO	1846.27	0.166227	0.0887732	1.87249	0.0611385	0.143027	FALSE	NoSigChange
ATAC	MLT1A	LTR	ERVL-MaLR	J1.TSA.vs.J1.DMSO	32317.6	0.139609	0.0532574	2.6214	0.00875698	0.0412219	TRUE	SigIncrease
ATAC	MLT1A-int	LTR	ERVL-MaLR	J1.TSA.vs.J1.DMSO	950.182	0.198267	0.0956107	2.07369	0.0381085	0.10793	FALSE	NoSigChange
ATAC	MLT1A0	LTR	ERVL-MaLR	J1.TSA.vs.J1.DMSO	68940.4	0.152343	0.0639924	2.38064	0.0172827	0.0663794	FALSE	NoSigChange
ATAC	MLT1A0-int	LTR	ERVL-MaLR	J1.TSA.vs.J1.DMSO	1991.48	0.15329	0.074157	2.0671	0.0387247	0.108513	FALSE	NoSigChange
ATAC	MLT1A1	LTR	ERVL-MaLR	J1.TSA.vs.J1.DMSO	46738.8	0.147446	0.0668242	2.20647	0.027351	0.0892812	FALSE	NoSigChange
ATAC	MLT1A1-int	LTR	ERVL-MaLR	J1.TSA.vs.J1.DMSO	1276.9	0.189293	0.0913477	2.07222	0.0382447	0.10793	FALSE	NoSigChange
ATAC	MLT1B	LTR	ERVL-MaLR	J1.TSA.vs.J1.DMSO	64594.9	0.124387	0.056254	2.21117	0.0270243	0.0885893	FALSE	NoSigChange
ATAC	MLT1B-int	LTR	ERVL-MaLR	J1.TSA.vs.J1.DMSO	1230.15	0.120406	0.0746843	1.61221	0.106917	0.205835	FALSE	NoSigChange
ATAC	MLT1C	LTR	ERVL-MaLR	J1.TSA.vs.J1.DMSO	57183.7	0.116884	0.0547245	2.13586	0.0326907	0.0999407	FALSE	NoSigChange
ATAC	MLT1C-int	LTR	ERVL-MaLR	J1.TSA.vs.J1.DMSO	844.059	0.192365	0.101495	1.89531	0.058051	0.139161	FALSE	NoSigChange
ATAC	MLT1D	LTR	ERVL-MaLR	J1.TSA.vs.J1.DMSO	60231	0.115521	0.0593575	1.94619	0.0516319	0.12882	FALSE	NoSigChange
ATAC	MLT1D-int	LTR	ERVL-MaLR	J1.TSA.vs.J1.DMSO	1426.24	0.109482	0.108656	1.00761	0.313644	0.430206	FALSE	NoSigChange
ATAC	MLT1E	LTR	ERVL-MaLR	J1.TSA.vs.J1.DMSO	3705.8	0.12428	0.070658	1.75889	0.0785961	0.168078	FALSE	NoSigChange
ATAC	MLT1E-int	LTR	ERVL-MaLR	J1.TSA.vs.J1.DMSO	60.2429	0.0943754	0.200543	0.4706	0.637927	0.725301	FALSE	NoSigChange
ATAC	MLT1E1	LTR	ERVL-MaLR	J1.TSA.vs.J1.DMSO	4233.79	0.144182	0.0525455	2.74396	0.00607035	0.0322322	TRUE	SigIncrease
ATAC	MLT1E1-int	LTR	ERVL-MaLR	J1.TSA.vs.J1.DMSO	70.0762	0.283607	0.215871	1.31378	0.188921	0.302576	FALSE	NoSigChange
ATAC	MLT1E1A	LTR	ERVL-MaLR	J1.TSA.vs.J1.DMSO	8564.66	0.0922199	0.0619273	1.48916	0.136444	0.241317	FALSE	NoSigChange
ATAC	MLT1E1A-int	LTR	ERVL-MaLR	J1.TSA.vs.J1.DMSO	350.42	-0.0804275	0.101129	-0.795298	0.42644	0.538367	FALSE	NoSigChange
ATAC	MLT1E2	LTR	ERVL-MaLR	J1.TSA.vs.J1.DMSO	13486.7	0.115637	0.0594273	1.94586	0.0516718	0.12882	FALSE	NoSigChange
ATAC	MLT1E2-int	LTR	ERVL-MaLR	J1.TSA.vs.J1.DMSO	268.189	0.333801	0.0886675	3.76464	0.000166792	0.00236315	TRUE	SigIncrease
ATAC	MLT1E3	LTR	ERVL-MaLR	J1.TSA.vs.J1.DMSO	7799.91	0.137965	0.0618844	2.22941	0.0257869	0.0863664	FALSE	NoSigChange
ATAC	MLT1E3-int	LTR	ERVL-MaLR	J1.TSA.vs.J1.DMSO	72.6476	-0.0936408	0.18844	-0.496926	0.619241	0.709279	FALSE	NoSigChange
ATAC	MLT1F	LTR	ERVL-MaLR	J1.TSA.vs.J1.DMSO	13517.9	0.0757457	0.0531136	1.42611	0.153837	0.260158	FALSE	NoSigChange
ATAC	MLT1F-int	LTR	ERVL-MaLR	J1.TSA.vs.J1.DMSO	3125.34	0.113957	0.0806434	1.4131	0.157627	0.265115	FALSE	NoSigChange
ATAC	MLT1F1	LTR	ERVL-MaLR	J1.TSA.vs.J1.DMSO	12781.1	0.0862503	0.0442859	1.94758	0.0514651	0.12882	FALSE	NoSigChange
ATAC	MLT1F1-int	LTR	ERVL-MaLR	J1.TSA.vs.J1.DMSO	732.817	0.0606255	0.0783581	0.773698	0.439109	0.552555	FALSE	NoSigChange
ATAC	MLT1F2	LTR	ERVL-MaLR	J1.TSA.vs.J1.DMSO	19163	0.140812	0.0537886	2.61787	0.00884796	0.0412726	TRUE	SigIncrease
ATAC	MLT1F2-int	LTR	ERVL-MaLR	J1.TSA.vs.J1.DMSO	640.861	-0.0036095	0.0858089	-0.0420644	0.966447	0.971922	FALSE	NoSigChange
ATAC	MLT1G	LTR	ERVL-MaLR	J1.TSA.vs.J1.DMSO	7144.4	0.131075	0.0596271	2.19824	0.0279321	0.090151	FALSE	NoSigChange
ATAC	MLT1G-int	LTR	ERVL-MaLR	J1.TSA.vs.J1.DMSO	269.37	0.213202	0.118938	1.79254	0.0730469	0.159751	FALSE	NoSigChange
ATAC	MLT1G1	LTR	ERVL-MaLR	J1.TSA.vs.J1.DMSO	8627.57	0.0949322	0.0552758	1.71743	0.0859014	0.177791	FALSE	NoSigChange
ATAC	MLT1G1-int	LTR	ERVL-MaLR	J1.TSA.vs.J1.DMSO	432.17	0.22379	0.115036	1.94539	0.0517281	0.12882	FALSE	NoSigChange
ATAC	MLT1G3	LTR	ERVL-MaLR	J1.TSA.vs.J1.DMSO	8962.17	0.0874309	0.0413187	2.11601	0.0343438	0.102491	FALSE	NoSigChange
ATAC	MLT1G3-int	LTR	ERVL-MaLR	J1.TSA.vs.J1.DMSO	618.856	0.196954	0.092277	2.13438	0.0328121	0.0999407	FALSE	NoSigChange
ATAC	MLT1H	LTR	ERVL-MaLR	J1.TSA.vs.J1.DMSO	17426.1	0.0961411	0.0469101	2.04947	0.0404159	0.11191	FALSE	NoSigChange
ATAC	MLT1H-int	LTR	ERVL-MaLR	J1.TSA.vs.J1.DMSO	2556.86	0.206694	0.084853	2.43591	0.0148543	0.0605147	FALSE	NoSigChange
ATAC	MLT1H1	LTR	ERVL-MaLR	J1.TSA.vs.J1.DMSO	7340.06	0.118135	0.0526337	2.24448	0.0248016	0.0847334	FALSE	NoSigChange
ATAC	MLT1H1-int	LTR	ERVL-MaLR	J1.TSA.vs.J1.DMSO	422.303	0.131727	0.105066	1.25376	0.20993	0.322519	FALSE	NoSigChange
ATAC	MLT1H2	LTR	ERVL-MaLR	J1.TSA.vs.J1.DMSO	6757.06	0.115696	0.0475523	2.43302	0.0149734	0.0608391	FALSE	NoSigChange
ATAC	MLT1H2-int	LTR	ERVL-MaLR	J1.TSA.vs.J1.DMSO	524.202	0.111524	0.0895882	1.24485	0.213186	0.324899	FALSE	NoSigChange
ATAC	MLT1I	LTR	ERVL-MaLR	J1.TSA.vs.J1.DMSO	12402.2	0.0877502	0.0414307	2.118	0.0341749	0.10226	FALSE	NoSigChange
ATAC	MLT1I-int	LTR	ERVL-MaLR	J1.TSA.vs.J1.DMSO	436.846	0.178123	0.101576	1.75359	0.0795009	0.169102	FALSE	NoSigChange
ATAC	MLT1J	LTR	ERVL-MaLR	J1.TSA.vs.J1.DMSO	20950	0.0459897	0.0435928	1.05499	0.291432	0.406423	FALSE	NoSigChange
ATAC	MLT1J-int	LTR	ERVL-MaLR	J1.TSA.vs.J1.DMSO	3989.23	0.104839	0.0600934	1.7446	0.0810552	0.17127	FALSE	NoSigChange
ATAC	MLT1J1	LTR	ERVL-MaLR	J1.TSA.vs.J1.DMSO	7729.56	0.0566935	0.0374206	1.51503	0.129764	0.232431	FALSE	NoSigChange
ATAC	MLT1J1-int	LTR	ERVL-MaLR	J1.TSA.vs.J1.DMSO	511.996	0.13044	0.122289	1.06666	0.286127	0.401788	FALSE	NoSigChange
ATAC	MLT1J2	LTR	ERVL-MaLR	J1.TSA.vs.J1.DMSO	8083.11	0.038184	0.0407289	0.937516	0.348493	0.464657	FALSE	NoSigChange
ATAC	MLT1J2-int	LTR	ERVL-MaLR	J1.TSA.vs.J1.DMSO	227.907	0.0697509	0.122564	0.569099	0.569289	0.668545	FALSE	NoSigChange
ATAC	MLT1K	LTR	ERVL-MaLR	J1.TSA.vs.J1.DMSO	25524	0.0208484	0.0532452	0.391555	0.695387	0.766913	FALSE	NoSigChange
ATAC	MLT1K-int	LTR	ERVL-MaLR	J1.TSA.vs.J1.DMSO	53.9405	0.4705	0.211922	2.22016	0.026408	0.087124	FALSE	NoSigChange
ATAC	MLT1L	LTR	ERVL-MaLR	J1.TSA.vs.J1.DMSO	10842.2	0.0383142	0.0404285	0.947703	0.343281	0.459294	FALSE	NoSigChange
ATAC	MLT1L-int	LTR	ERVL-MaLR	J1.TSA.vs.J1.DMSO	93.2994	0.47924	0.136147	3.52002	0.000431509	0.00472517	TRUE	SigIncrease
ATAC	MLT1M	LTR	ERVL-MaLR	J1.TSA.vs.J1.DMSO	1808.28	0.0180114	0.0603978	0.298214	0.76554	0.822543	FALSE	NoSigChange
ATAC	MLT1N2	LTR	ERVL-MaLR	J1.TSA.vs.J1.DMSO	4421.09	0.0293967	0.0426221	0.689706	0.490379	0.601864	FALSE	NoSigChange
ATAC	MLT1N2-int	LTR	ERVL-MaLR	J1.TSA.vs.J1.DMSO	21.941	0.106509	0.397573	0.267897	0.788778	0.837027	FALSE	NoSigChange
ATAC	MLT1O	LTR	ERVL-MaLR	J1.TSA.vs.J1.DMSO	5037.24	-0.0672298	0.0516634	-1.3013	0.193155	0.306192	FALSE	NoSigChange
ATAC	MLT2B1	LTR	ERVL	J1.TSA.vs.J1.DMSO	12386.6	0.158274	0.0712832	2.22036	0.0263946	0.087124	FALSE	NoSigChange
ATAC	MLT2B2	LTR	ERVL	J1.TSA.vs.J1.DMSO	9198.42	0.1861	0.0813684	2.28712	0.0221886	0.0787758	FALSE	NoSigChange
ATAC	MLT2B3	LTR	ERVL	J1.TSA.vs.J1.DMSO	12332.5	0.126176	0.0615781	2.04904	0.0404581	0.11191	FALSE	NoSigChange
ATAC	MLT2B4	LTR	ERVL	J1.TSA.vs.J1.DMSO	12807.7	0.157064	0.070313	2.23379	0.0254969	0.0861428	FALSE	NoSigChange
ATAC	MLT2B5	LTR	ERVL	J1.TSA.vs.J1.DMSO	3005.78	0.104902	0.0691654	1.51669	0.129345	0.23195	FALSE	NoSigChange
ATAC	MLT2C1	LTR	ERVL	J1.TSA.vs.J1.DMSO	5594.67	0.148315	0.0697313	2.12695	0.0334244	0.100835	FALSE	NoSigChange
ATAC	MLT2C2	LTR	ERVL	J1.TSA.vs.J1.DMSO	3975.86	0.17064	0.0847263	2.01402	0.0440075	0.118046	FALSE	NoSigChange
ATAC	MLT2D	LTR	ERVL	J1.TSA.vs.J1.DMSO	9976.84	0.168466	0.0835578	2.01616	0.043783	0.117977	FALSE	NoSigChange
ATAC	MLT2E	LTR	ERVL	J1.TSA.vs.J1.DMSO	931.053	0.0337924	0.065113	0.51898	0.603774	0.696732	FALSE	NoSigChange
ATAC	MLT2F	LTR	ERVL	J1.TSA.vs.J1.DMSO	4758.3	0.0956871	0.0495956	1.92935	0.0536876	0.132418	FALSE	NoSigChange
ATAC	MLTR11A	LTR	ERVK	J1.TSA.vs.J1.DMSO	26987.5	0.0791056	0.0406981	1.94372	0.0519296	0.128906	FALSE	NoSigChange
ATAC	MLTR11B	LTR	ERVK	J1.TSA.vs.J1.DMSO	34955.8	0.0599271	0.0355123	1.6875	0.0915068	0.185172	FALSE	NoSigChange
ATAC	MLTR12	LTR	ERV1	J1.TSA.vs.J1.DMSO	3222.12	0.148615	0.071889	2.06728	0.0387075	0.108513	FALSE	NoSigChange
ATAC	MLTR13	LTR	ERVK	J1.TSA.vs.J1.DMSO	1865.53	0.105319	0.0569374	1.84973	0.0643521	0.146332	FALSE	NoSigChange
ATAC	MLTR14	LTR	ERV1	J1.TSA.vs.J1.DMSO	66418.9	-0.0334212	0.0290692	-1.14971	0.250263	0.365569	FALSE	NoSigChange
ATAC	MLTR18_MM	LTR	ERVK	J1.TSA.vs.J1.DMSO	4944.15	0.113768	0.0470584	2.41758	0.0156241	0.0623348	FALSE	NoSigChange
ATAC	MLTR18A_MM	LTR	ERVK	J1.TSA.vs.J1.DMSO	4266.61	0.128091	0.0677886	1.88956	0.0588165	0.139712	FALSE	NoSigChange
ATAC	MLTR18B_MM	LTR	ERVK	J1.TSA.vs.J1.DMSO	6679.35	-0.113717	0.0398899	-2.85077	0.00436132	0.025271	TRUE	SigDecrease
ATAC	MLTR18C_MM	LTR	ERVK	J1.TSA.vs.J1.DMSO	6152	0.196361	0.0532951	3.68442	0.000229228	0.00297418	TRUE	SigIncrease
ATAC	MLTR18D_MM	LTR	ERVK	J1.TSA.vs.J1.DMSO	8363.53	0.0998494	0.0483486	2.0652	0.0389043	0.108819	FALSE	NoSigChange
ATAC	MLTR25A	LTR	ERVK	J1.TSA.vs.J1.DMSO	33051.6	-0.140813	0.0677533	-2.07832	0.0376797	0.107148	FALSE	NoSigChange
ATAC	MLTR25C	LTR	ERVK	J1.TSA.vs.J1.DMSO	6596.31	0.327719	0.117655	2.78543	0.00534562	0.0295829	TRUE	SigIncrease
ATAC	MLTR31A_MM	LTR	ERVK	J1.TSA.vs.J1.DMSO	5563.2	0.0706517	0.0539773	1.30892	0.190563	0.303956	FALSE	NoSigChange
ATAC	MLTR31C_MM	LTR	ERVK	J1.TSA.vs.J1.DMSO	4896.27	-0.0389892	0.0771525	-0.505352	0.613312	0.705628	FALSE	NoSigChange
ATAC	MLTR31D_MM	LTR	ERVK	J1.TSA.vs.J1.DMSO	4204.05	-0.0255506	0.0622378	-0.410532	0.681416	0.758002	FALSE	NoSigChange
ATAC	MLTR31E_MM	LTR	ERVK	J1.TSA.vs.J1.DMSO	2490.26	0.155442	0.0605538	2.567	0.0102582	0.0456446	TRUE	SigIncrease
ATAC	MLTR31F_MM	LTR	ERVK	J1.TSA.vs.J1.DMSO	6688.22	0.00140435	0.060355	0.0232681	0.981436	0.983347	FALSE	NoSigChange
ATAC	MLTR31FA_MM	LTR	ERVK	J1.TSA.vs.J1.DMSO	8011.98	0.102748	0.0458109	2.24287	0.0249053	0.0847334	FALSE	NoSigChange
ATAC	MLTR32C_MM	LTR	ERVK	J1.TSA.vs.J1.DMSO	1333.41	0.1066	0.0781057	1.36482	0.172311	0.283331	FALSE	NoSigChange
ATAC	MLTR73	LTR	ERV1	J1.TSA.vs.J1.DMSO	6315.26	0.0130127	0.0438494	0.29676	0.76665	0.822839	FALSE	NoSigChange
ATAC	MMAR1	DNA	TcMar-Mariner	J1.TSA.vs.J1.DMSO	2625.92	0.0780454	0.0840977	0.928033	0.353391	0.467955	FALSE	NoSigChange
ATAC	MMERGLN-int	LTR	ERV1	J1.TSA.vs.J1.DMSO	41488	0.331232	0.0577958	5.73107	9.97994e-09	1.02727e-06	TRUE	SigIncrease
ATAC	MMERGLN_LTR	LTR	ERV1	J1.TSA.vs.J1.DMSO	24567.5	0.318079	0.168854	1.88375	0.0595991	0.14092	FALSE	NoSigChange
ATAC	MMERVK10C-int	LTR	ERVK	J1.TSA.vs.J1.DMSO	64125.3	0.218471	0.083429	2.61865	0.00882796	0.0412726	TRUE	SigIncrease
ATAC	MMERVK10D3_I-int	LTR	ERVK	J1.TSA.vs.J1.DMSO	12324.8	0.201152	0.0711731	2.82624	0.00470984	0.0265995	TRUE	SigIncrease
ATAC	MMERVK10D3_LTR	LTR	ERVK	J1.TSA.vs.J1.DMSO	2625.45	0.0784802	0.072703	1.07946	0.280381	0.3968	FALSE	NoSigChange
ATAC	MMERVK9C_I-int	LTR	ERVK	J1.TSA.vs.J1.DMSO	53532.3	-0.0404725	0.0816115	-0.495917	0.619953	0.709384	FALSE	NoSigChange
ATAC	MMERVK9E_I-int	LTR	ERVK	J1.TSA.vs.J1.DMSO	38844	0.0100371	0.0553904	0.181206	0.856206	0.887832	FALSE	NoSigChange
ATAC	MMETn-int	LTR	ERVK	J1.TSA.vs.J1.DMSO	55494.9	-0.366858	0.108733	-3.37395	0.000740978	0.00710602	TRUE	SigDecrease
ATAC	MMSAT4	Satellite	Satellite	J1.TSA.vs.J1.DMSO	17257.5	-0.0272075	0.0520437	-0.522781	0.601127	0.695236	FALSE	NoSigChange
ATAC	MMTV-int	LTR	ERVK	J1.TSA.vs.J1.DMSO	1946.04	0.261046	0.0669264	3.90049	9.59977e-05	0.0015322	TRUE	SigIncrease
ATAC	MMVL30-int	LTR	ERV1	J1.TSA.vs.J1.DMSO	20931.5	0.0869113	0.0239743	3.62518	0.000288757	0.0035845	TRUE	SigIncrease
ATAC	MRLTR33	LTR	ERVK	J1.TSA.vs.J1.DMSO	4420.82	0.13328	0.0537256	2.48076	0.0131103	0.0544147	FALSE	NoSigChange
ATAC	MT-int	LTR	ERVL-MaLR	J1.TSA.vs.J1.DMSO	3802.39	0.177549	0.0609008	2.91539	0.00355249	0.0219568	TRUE	SigIncrease
ATAC	MT2_Mm	LTR	ERVL	J1.TSA.vs.J1.DMSO	42708.2	0.553409	0.148345	3.73055	0.00019106	0.00265762	TRUE	SigIncrease
ATAC	MT2A	LTR	ERVL	J1.TSA.vs.J1.DMSO	80239.5	0.1334	0.0504663	2.64335	0.00820899	0.0399832	TRUE	SigIncrease
ATAC	MT2B	LTR	ERVL	J1.TSA.vs.J1.DMSO	78418	0.0261488	0.0430118	0.607945	0.543224	0.647174	FALSE	NoSigChange
ATAC	MT2B1	LTR	ERVL	J1.TSA.vs.J1.DMSO	49484.8	0.197306	0.0781605	2.52437	0.0115907	0.0498496	TRUE	SigIncrease
ATAC	MT2B2	LTR	ERVL	J1.TSA.vs.J1.DMSO	25963.1	0.0678228	0.0417678	1.6238	0.104418	0.203561	FALSE	NoSigChange
ATAC	MT2C_Mm	LTR	ERVL	J1.TSA.vs.J1.DMSO	20578.1	0.210006	0.0620147	3.38638	0.000708206	0.00687717	TRUE	SigIncrease
ATAC	MTA_Mm	LTR	ERVL-MaLR	J1.TSA.vs.J1.DMSO	179640	0.187199	0.0519899	3.60069	0.000317377	0.00388913	TRUE	SigIncrease
ATAC	MTA_Mm-int	LTR	ERVL-MaLR	J1.TSA.vs.J1.DMSO	69606.2	0.207211	0.0764614	2.71001	0.00672821	0.0343985	TRUE	SigIncrease
ATAC	MTB	LTR	ERVL-MaLR	J1.TSA.vs.J1.DMSO	69050.7	0.15259	0.0500336	3.04975	0.00229029	0.0160354	TRUE	SigIncrease
ATAC	MTB-int	LTR	ERVL-MaLR	J1.TSA.vs.J1.DMSO	10553.2	0.208568	0.0729637	2.85851	0.00425631	0.024889	TRUE	SigIncrease
ATAC	MTB_Mm	LTR	ERVL-MaLR	J1.TSA.vs.J1.DMSO	52597.1	0.141791	0.0395642	3.58382	0.00033861	0.00402165	TRUE	SigIncrease
ATAC	MTB_Mm-int	LTR	ERVL-MaLR	J1.TSA.vs.J1.DMSO	6278.2	0.195139	0.0727002	2.68416	0.00727132	0.0362165	TRUE	SigIncrease
ATAC	MTC	LTR	ERVL-MaLR	J1.TSA.vs.J1.DMSO	247799	0.132646	0.0357152	3.714	0.000204012	0.00276311	TRUE	SigIncrease
ATAC	MTC-int	LTR	ERVL-MaLR	J1.TSA.vs.J1.DMSO	39230.6	0.172935	0.0570359	3.03204	0.00242911	0.0167435	TRUE	SigIncrease
ATAC	MTD	LTR	ERVL-MaLR	J1.TSA.vs.J1.DMSO	436954	0.125744	0.040633	3.09463	0.00197061	0.014536	TRUE	SigIncrease
ATAC	MTD-int	LTR	ERVL-MaLR	J1.TSA.vs.J1.DMSO	28906.7	0.16103	0.0632832	2.54459	0.0109407	0.0478817	TRUE	SigIncrease
ATAC	MTE-int	LTR	ERVL-MaLR	J1.TSA.vs.J1.DMSO	49826.5	0.140602	0.0561051	2.50605	0.0122088	0.0520727	FALSE	NoSigChange
ATAC	MTE2a	LTR	ERVL-MaLR	J1.TSA.vs.J1.DMSO	122747	0.123921	0.0552329	2.2436	0.024858	0.0847334	FALSE	NoSigChange
ATAC	MTE2a-int	LTR	ERVL-MaLR	J1.TSA.vs.J1.DMSO	6281.95	0.29947	0.0808733	3.70295	0.000213107	0.00281228	TRUE	SigIncrease
ATAC	MTE2b	LTR	ERVL-MaLR	J1.TSA.vs.J1.DMSO	116302	0.103237	0.0425339	2.42716	0.0152177	0.0615082	FALSE	NoSigChange
ATAC	MTE2b-int	LTR	ERVL-MaLR	J1.TSA.vs.J1.DMSO	8281.28	0.175965	0.0725877	2.42417	0.0153435	0.0618546	FALSE	NoSigChange
ATAC	MTEa	LTR	ERVL-MaLR	J1.TSA.vs.J1.DMSO	160522	0.0915697	0.043843	2.08858	0.0367455	0.106846	FALSE	NoSigChange
ATAC	MTEa-int	LTR	ERVL-MaLR	J1.TSA.vs.J1.DMSO	16587.8	0.129542	0.0747403	1.73323	0.0830542	0.173292	FALSE	NoSigChange
ATAC	MTEb	LTR	ERVL-MaLR	J1.TSA.vs.J1.DMSO	81556.7	0.0904222	0.0434794	2.07966	0.0375571	0.107148	FALSE	NoSigChange
ATAC	MTEb-int	LTR	ERVL-MaLR	J1.TSA.vs.J1.DMSO	8199.74	0.0608195	0.0526194	1.15584	0.247747	0.362924	FALSE	NoSigChange
ATAC	MuLV-int	LTR	ERV1	J1.TSA.vs.J1.DMSO	5667.02	0.323805	0.0639727	5.0616	4.15745e-07	2.46889e-05	TRUE	SigIncrease
ATAC	MurERV4-int	LTR	ERVK	J1.TSA.vs.J1.DMSO	13111.8	0.132281	0.0857919	1.54188	0.123102	0.223349	FALSE	NoSigChange
ATAC	MurERV4_19-int	LTR	ERVK	J1.TSA.vs.J1.DMSO	10157.7	0.272283	0.115931	2.34866	0.0188412	0.0705741	FALSE	NoSigChange
ATAC	MuRRS-int	LTR	ERV1	J1.TSA.vs.J1.DMSO	25089.4	0.368232	0.0687281	5.3578	8.42394e-08	5.91207e-06	TRUE	SigIncrease
ATAC	MuRRS4-int	LTR	ERV1	J1.TSA.vs.J1.DMSO	37609.1	0.549412	0.0928615	5.91646	3.2894e-09	4.61712e-07	TRUE	SigIncrease
ATAC	MurSAT1	Satellite	Satellite	J1.TSA.vs.J1.DMSO	8282.16	0.651716	0.131721	4.94769	7.50999e-07	3.8938e-05	TRUE	SigIncrease
ATAC	MurSatRep1	Unknown	Unknown	J1.TSA.vs.J1.DMSO	17630	0.0893434	0.0781748	1.14287	0.253094	0.36831	FALSE	NoSigChange
ATAC	MURVY-int	LTR	ERV1	J1.TSA.vs.J1.DMSO	24689.2	0.595837	0.0931963	6.39335	1.62289e-10	3.13218e-08	TRUE	SigIncrease
ATAC	MURVY-LTR	LTR	ERV1	J1.TSA.vs.J1.DMSO	20813.2	0.240481	0.0573032	4.19664	2.70901e-05	0.000606191	TRUE	SigIncrease
ATAC	MusHAL1	LINE	L1	J1.TSA.vs.J1.DMSO	36824.5	0.338668	0.137469	2.46358	0.0137555	0.0564855	FALSE	NoSigChange
ATAC	MYSERV-int	LTR	ERVK	J1.TSA.vs.J1.DMSO	11635.7	0.189003	0.1189	1.58959	0.111927	0.212043	FALSE	NoSigChange
ATAC	MYSERV16_I-int	LTR	ERVK	J1.TSA.vs.J1.DMSO	23977.6	0.239964	0.125265	1.91565	0.0554098	0.134941	FALSE	NoSigChange
ATAC	MYSERV6-int	LTR	ERVK	J1.TSA.vs.J1.DMSO	30730.6	0.231909	0.115614	2.00589	0.0448676	0.11903	FALSE	NoSigChange
ATAC	nhAT5a_ML	DNA	hAT-Charlie	J1.TSA.vs.J1.DMSO	13.9559	-0.137407	0.345977	-0.397155	0.691253	0.763444	FALSE	NoSigChange
ATAC	ORR1A0	LTR	ERVL-MaLR	J1.TSA.vs.J1.DMSO	22733.6	0.305481	0.0727779	4.19744	2.6995e-05	0.000606191	TRUE	SigIncrease
ATAC	ORR1A0-int	LTR	ERVL-MaLR	J1.TSA.vs.J1.DMSO	15157.2	0.328422	0.0719994	4.56146	5.07989e-06	0.000170507	TRUE	SigIncrease
ATAC	ORR1A1	LTR	ERVL-MaLR	J1.TSA.vs.J1.DMSO	42635.6	0.246574	0.0568759	4.33529	1.45567e-05	0.000377679	TRUE	SigIncrease
ATAC	ORR1A1-int	LTR	ERVL-MaLR	J1.TSA.vs.J1.DMSO	22256	0.220235	0.064435	3.41795	0.000630958	0.00628515	TRUE	SigIncrease
ATAC	ORR1A2	LTR	ERVL-MaLR	J1.TSA.vs.J1.DMSO	144691	0.187762	0.051087	3.67534	0.000237532	0.00305624	TRUE	SigIncrease
ATAC	ORR1A2-int	LTR	ERVL-MaLR	J1.TSA.vs.J1.DMSO	44752.2	0.178104	0.0654632	2.72067	0.0065149	0.0338687	TRUE	SigIncrease
ATAC	ORR1A3	LTR	ERVL-MaLR	J1.TSA.vs.J1.DMSO	42260.7	0.193481	0.0471844	4.10051	4.12232e-05	0.000816008	TRUE	SigIncrease
ATAC	ORR1A3-int	LTR	ERVL-MaLR	J1.TSA.vs.J1.DMSO	21726.1	0.258332	0.0726249	3.55708	0.000375004	0.00428893	TRUE	SigIncrease
ATAC	ORR1A4	LTR	ERVL-MaLR	J1.TSA.vs.J1.DMSO	80307	0.157661	0.0334962	4.70683	2.51604e-06	9.52111e-05	TRUE	SigIncrease
ATAC	ORR1A4-int	LTR	ERVL-MaLR	J1.TSA.vs.J1.DMSO	25065.8	0.221212	0.0745474	2.9674	0.00300327	0.0196485	TRUE	SigIncrease
ATAC	ORR1B1	LTR	ERVL-MaLR	J1.TSA.vs.J1.DMSO	174291	0.186153	0.0330853	5.62646	1.83942e-08	1.73107e-06	TRUE	SigIncrease
ATAC	ORR1B1-int	LTR	ERVL-MaLR	J1.TSA.vs.J1.DMSO	35278.3	0.164377	0.0682128	2.40976	0.0159628	0.0629642	FALSE	NoSigChange
ATAC	ORR1B2	LTR	ERVL-MaLR	J1.TSA.vs.J1.DMSO	90161.5	0.0936788	0.0276166	3.39212	0.000693546	0.00677743	TRUE	SigIncrease
ATAC	ORR1B2-int	LTR	ERVL-MaLR	J1.TSA.vs.J1.DMSO	12686.3	0.151119	0.0680011	2.2223	0.0262634	0.0870185	FALSE	NoSigChange
ATAC	ORR1C1	LTR	ERVL-MaLR	J1.TSA.vs.J1.DMSO	78422.6	0.0553005	0.0295751	1.86983	0.061507	0.143454	FALSE	NoSigChange
ATAC	ORR1C1-int	LTR	ERVL-MaLR	J1.TSA.vs.J1.DMSO	12011.7	0.146276	0.0694356	2.10664	0.0351491	0.104166	FALSE	NoSigChange
ATAC	ORR1C2	LTR	ERVL-MaLR	J1.TSA.vs.J1.DMSO	105433	0.0287732	0.0241088	1.19348	0.232683	0.347114	FALSE	NoSigChange
ATAC	ORR1C2-int	LTR	ERVL-MaLR	J1.TSA.vs.J1.DMSO	13638.2	0.0369668	0.0489144	0.755745	0.449802	0.561888	FALSE	NoSigChange
ATAC	ORR1D-int	LTR	ERVL-MaLR	J1.TSA.vs.J1.DMSO	6433.83	0.361288	0.0768536	4.701	2.58892e-06	9.52111e-05	TRUE	SigIncrease
ATAC	ORR1D1	LTR	ERVL-MaLR	J1.TSA.vs.J1.DMSO	174068	0.0801823	0.0374308	2.14215	0.0321818	0.0991789	FALSE	NoSigChange
ATAC	ORR1D1-int	LTR	ERVL-MaLR	J1.TSA.vs.J1.DMSO	22100.3	0.0870381	0.0529628	1.64338	0.100304	0.198043	FALSE	NoSigChange
ATAC	ORR1D2	LTR	ERVL-MaLR	J1.TSA.vs.J1.DMSO	134163	0.0780543	0.0307255	2.54037	0.0110735	0.0482823	TRUE	SigIncrease
ATAC	ORR1D2-int	LTR	ERVL-MaLR	J1.TSA.vs.J1.DMSO	14766.5	0.192977	0.0633806	3.04473	0.00232891	0.0161975	TRUE	SigIncrease
ATAC	ORR1E	LTR	ERVL-MaLR	J1.TSA.vs.J1.DMSO	205695	0.110747	0.038093	2.90728	0.00364582	0.0222468	TRUE	SigIncrease
ATAC	ORR1E-int	LTR	ERVL-MaLR	J1.TSA.vs.J1.DMSO	17431	0.166544	0.0760341	2.19039	0.0284962	0.0912825	FALSE	NoSigChange
ATAC	ORR1F	LTR	ERVL-MaLR	J1.TSA.vs.J1.DMSO	171732	0.127492	0.0483724	2.63563	0.00839816	0.0405211	TRUE	SigIncrease
ATAC	ORR1F-int	LTR	ERVL-MaLR	J1.TSA.vs.J1.DMSO	4277.49	0.0862939	0.0667025	1.29371	0.195764	0.30906	FALSE	NoSigChange
ATAC	ORR1G	LTR	ERVL-MaLR	J1.TSA.vs.J1.DMSO	33383.7	0.115981	0.0464932	2.49457	0.012611	0.0529112	FALSE	NoSigChange
ATAC	ORR1G-int	LTR	ERVL-MaLR	J1.TSA.vs.J1.DMSO	757.721	0.133151	0.0982901	1.35468	0.175521	0.286776	FALSE	NoSigChange
ATAC	ORSL	DNA	hAT-Tip100	J1.TSA.vs.J1.DMSO	1124.65	0.222837	0.0997217	2.23459	0.0254441	0.0861428	FALSE	NoSigChange
ATAC	ORSL-2a	DNA	hAT-Tip100	J1.TSA.vs.J1.DMSO	453.02	-0.0258009	0.0878322	-0.293752	0.768947	0.823801	FALSE	NoSigChange
ATAC	ORSL-2b	DNA	hAT-Tip100	J1.TSA.vs.J1.DMSO	1007.45	0.112102	0.122674	0.913819	0.360812	0.475742	FALSE	NoSigChange
ATAC	PB1	SINE	Alu	J1.TSA.vs.J1.DMSO	58628.9	-0.0275652	0.049629	-0.555425	0.578604	0.674491	FALSE	NoSigChange
ATAC	PB1D10	SINE	Alu	J1.TSA.vs.J1.DMSO	312307	-0.0254835	0.0496828	-0.512923	0.608005	0.700567	FALSE	NoSigChange
ATAC	PB1D11	SINE	Alu	J1.TSA.vs.J1.DMSO	80892.6	-0.028324	0.0497827	-0.568952	0.569389	0.668545	FALSE	NoSigChange
ATAC	PB1D7	SINE	Alu	J1.TSA.vs.J1.DMSO	128121	-0.0717951	0.0576639	-1.24506	0.213109	0.324899	FALSE	NoSigChange
ATAC	PB1D9	SINE	Alu	J1.TSA.vs.J1.DMSO	149587	-0.0925597	0.0630255	-1.46861	0.141939	0.247313	FALSE	NoSigChange
ATAC	Plat_L3	LINE	CR1	J1.TSA.vs.J1.DMSO	3339.91	0.0289694	0.0500653	0.578632	0.562838	0.664389	FALSE	NoSigChange
ATAC	polypurine	Low_complexity	Low_complexity	J1.TSA.vs.J1.DMSO	5704.16	0.12045	0.0581217	2.07238	0.0382303	0.10793	FALSE	NoSigChange
ATAC	polypyrimidine	Low_complexity	Low_complexity	J1.TSA.vs.J1.DMSO	5734.6	0.130592	0.0537999	2.42736	0.0152092	0.0615082	FALSE	NoSigChange
ATAC	RCHARR1	DNA	hAT-Charlie	J1.TSA.vs.J1.DMSO	43863.5	0.173843	0.101791	1.70784	0.0876659	0.179563	FALSE	NoSigChange
ATAC	Ricksha	DNA	MuDR	J1.TSA.vs.J1.DMSO	1025.39	0.0777785	0.0798606	0.973928	0.330092	0.447858	FALSE	NoSigChange
ATAC	Ricksha_0	DNA	MuDR	J1.TSA.vs.J1.DMSO	575.201	0.242368	0.120538	2.01072	0.0443548	0.118386	FALSE	NoSigChange
ATAC	Ricksha_a	DNA	MuDR	J1.TSA.vs.J1.DMSO	229.573	0.0432308	0.122609	0.352591	0.724395	0.789878	FALSE	NoSigChange
ATAC	Ricksha_b	DNA	MuDR	J1.TSA.vs.J1.DMSO	59.7572	0.217769	0.171903	1.26681	0.205223	0.317862	FALSE	NoSigChange
ATAC	Ricksha_c	DNA	MuDR	J1.TSA.vs.J1.DMSO	2287.87	0.186963	0.0733896	2.54755	0.0108484	0.0477205	TRUE	SigIncrease
ATAC	RLTR1	LTR	ERV1	J1.TSA.vs.J1.DMSO	906.433	0.579004	0.117211	4.93986	7.81786e-07	3.8938e-05	TRUE	SigIncrease
ATAC	RLTR10	LTR	ERVK	J1.TSA.vs.J1.DMSO	44882.1	0.167144	0.0601416	2.77918	0.00544964	0.029944	TRUE	SigIncrease
ATAC	RLTR10-int	LTR	ERVK	J1.TSA.vs.J1.DMSO	74129.4	0.150855	0.0590041	2.55669	0.0105675	0.0468855	TRUE	SigIncrease
ATAC	RLTR10A	LTR	ERVK	J1.TSA.vs.J1.DMSO	15010.6	0.103975	0.0677329	1.53507	0.124766	0.226102	FALSE	NoSigChange
ATAC	RLTR10B	LTR	ERVK	J1.TSA.vs.J1.DMSO	4599.54	0.0682495	0.0620899	1.0992	0.271679	0.387325	FALSE	NoSigChange
ATAC	RLTR10B2	LTR	ERVK	J1.TSA.vs.J1.DMSO	24951.9	-0.0920044	0.103579	-0.888254	0.374404	0.48907	FALSE	NoSigChange
ATAC	RLTR10C	LTR	ERVK	J1.TSA.vs.J1.DMSO	75478	-0.385483	0.105336	-3.65954	0.000252668	0.00322413	TRUE	SigDecrease
ATAC	RLTR10D	LTR	ERVK	J1.TSA.vs.J1.DMSO	7038.27	-0.0203045	0.0589844	-0.344235	0.73067	0.795034	FALSE	NoSigChange
ATAC	RLTR10D2	LTR	ERVK	J1.TSA.vs.J1.DMSO	7464.52	-0.129118	0.101524	-1.27179	0.203446	0.316654	FALSE	NoSigChange
ATAC	RLTR10E	LTR	ERVK	J1.TSA.vs.J1.DMSO	6229.58	-0.169375	0.0882011	-1.92032	0.0548169	0.134013	FALSE	NoSigChange
ATAC	RLTR10F	LTR	ERVK	J1.TSA.vs.J1.DMSO	10372.7	-0.0890691	0.0791445	-1.1254	0.26042	0.375433	FALSE	NoSigChange
ATAC	RLTR11A	LTR	ERVK	J1.TSA.vs.J1.DMSO	32787.8	0.000792811	0.0282116	0.0281023	0.977581	0.980673	FALSE	NoSigChange
ATAC	RLTR11A2	LTR	ERVK	J1.TSA.vs.J1.DMSO	35534.7	-0.0437106	0.0355671	-1.22896	0.219086	0.330664	FALSE	NoSigChange
ATAC	RLTR11B	LTR	ERVK	J1.TSA.vs.J1.DMSO	14980.1	-0.356205	0.0663039	-5.37231	7.77339e-08	5.71529e-06	TRUE	SigDecrease
ATAC	RLTR11C_MM	LTR	ERVK	J1.TSA.vs.J1.DMSO	11499.5	-0.134388	0.0360478	-3.72806	0.000192961	0.00266011	TRUE	SigDecrease
ATAC	RLTR11D	LTR	ERVK	J1.TSA.vs.J1.DMSO	7053.91	-0.191352	0.0302675	-6.32204	2.58139e-10	4.42852e-08	TRUE	SigDecrease
ATAC	RLTR12A	LTR	ERVK	J1.TSA.vs.J1.DMSO	8344.45	0.041214	0.0653993	0.63019	0.52857	0.634613	FALSE	NoSigChange
ATAC	RLTR12B	LTR	ERVK	J1.TSA.vs.J1.DMSO	11112	-0.0496476	0.0405247	-1.22512	0.22053	0.332194	FALSE	NoSigChange
ATAC	RLTR12B2	LTR	ERVK	J1.TSA.vs.J1.DMSO	1180.67	-0.113721	0.071492	-1.59068	0.111681	0.212043	FALSE	NoSigChange
ATAC	RLTR12BD_Mm	LTR	ERVK	J1.TSA.vs.J1.DMSO	10917.8	-0.013959	0.0312356	-0.446895	0.654951	0.736836	FALSE	NoSigChange
ATAC	RLTR12C	LTR	ERVK	J1.TSA.vs.J1.DMSO	3993.81	0.0384607	0.046619	0.825001	0.409371	0.521079	FALSE	NoSigChange
ATAC	RLTR12D	LTR	ERVK	J1.TSA.vs.J1.DMSO	9148.42	-0.169348	0.0494924	-3.4217	0.000622308	0.00625824	TRUE	SigDecrease
ATAC	RLTR12E	LTR	ERVK	J1.TSA.vs.J1.DMSO	9989.2	-0.154314	0.0520287	-2.96594	0.00301764	0.0196592	TRUE	SigDecrease
ATAC	RLTR12F	LTR	ERVK	J1.TSA.vs.J1.DMSO	466.636	0.325431	0.105305	3.09037	0.00199906	0.0146282	TRUE	SigIncrease
ATAC	RLTR12G	LTR	ERVK	J1.TSA.vs.J1.DMSO	4203.22	-0.00655915	0.0511474	-0.12824	0.897959	0.921228	FALSE	NoSigChange
ATAC	RLTR12H	LTR	ERVK	J1.TSA.vs.J1.DMSO	2355.57	0.0247325	0.0624032	0.396334	0.691859	0.763567	FALSE	NoSigChange
ATAC	RLTR13A	LTR	ERVK	J1.TSA.vs.J1.DMSO	4425.8	-0.159551	0.183353	-0.870182	0.384201	0.498493	FALSE	NoSigChange
ATAC	RLTR13A1	LTR	ERVK	J1.TSA.vs.J1.DMSO	6218.19	-0.312402	0.0801066	-3.89983	9.62588e-05	0.0015322	TRUE	SigDecrease
ATAC	RLTR13A2	LTR	ERVK	J1.TSA.vs.J1.DMSO	4905.42	0.136017	0.108296	1.25597	0.209126	0.321604	FALSE	NoSigChange
ATAC	RLTR13A3	LTR	ERVK	J1.TSA.vs.J1.DMSO	4420.97	0.219775	0.0883131	2.48859	0.012825	0.0535185	FALSE	NoSigChange
ATAC	RLTR13B1	LTR	ERVK	J1.TSA.vs.J1.DMSO	27993.7	0.00882043	0.113156	0.077949	0.937869	0.9508	FALSE	NoSigChange
ATAC	RLTR13B2	LTR	ERVK	J1.TSA.vs.J1.DMSO	10981.2	-0.124821	0.128816	-0.968982	0.332554	0.450012	FALSE	NoSigChange
ATAC	RLTR13B3	LTR	ERVK	J1.TSA.vs.J1.DMSO	8531.13	0.0504539	0.0527903	0.955743	0.339202	0.456209	FALSE	NoSigChange
ATAC	RLTR13B4	LTR	ERVK	J1.TSA.vs.J1.DMSO	8281.36	0.253831	0.0585742	4.33349	1.46766e-05	0.000377679	TRUE	SigIncrease
ATAC	RLTR13C1	LTR	ERVK	J1.TSA.vs.J1.DMSO	7023.03	0.243227	0.0665959	3.65228	0.000259918	0.00328946	TRUE	SigIncrease
ATAC	RLTR13C2	LTR	ERVK	J1.TSA.vs.J1.DMSO	18809.1	0.260635	0.0847014	3.07711	0.00209022	0.0150107	TRUE	SigIncrease
ATAC	RLTR13C3	LTR	ERVK	J1.TSA.vs.J1.DMSO	11186.4	0.0947383	0.0772731	1.22602	0.220191	0.332007	FALSE	NoSigChange
ATAC	RLTR13D	LTR	ERVK	J1.TSA.vs.J1.DMSO	638.189	0.148072	0.0859532	1.7227	0.0849422	0.176041	FALSE	NoSigChange
ATAC	RLTR13D1	LTR	ERVK	J1.TSA.vs.J1.DMSO	7627.15	-0.532548	0.11853	-4.49294	7.02453e-06	0.000230763	TRUE	SigDecrease
ATAC	RLTR13D2	LTR	ERVK	J1.TSA.vs.J1.DMSO	7441.36	-0.115967	0.0750474	-1.54525	0.122287	0.22213	FALSE	NoSigChange
ATAC	RLTR13D3	LTR	ERVK	J1.TSA.vs.J1.DMSO	7138.45	0.0656529	0.0546325	1.20172	0.229472	0.344655	FALSE	NoSigChange
ATAC	RLTR13D3A	LTR	ERVK	J1.TSA.vs.J1.DMSO	2939.32	-0.0107572	0.0603136	-0.178355	0.858444	0.889556	FALSE	NoSigChange
ATAC	RLTR13D3A1	LTR	ERVK	J1.TSA.vs.J1.DMSO	5257.07	0.234625	0.0972891	2.41163	0.0158814	0.0628742	FALSE	NoSigChange
ATAC	RLTR13D4	LTR	ERVK	J1.TSA.vs.J1.DMSO	4611.28	0.218272	0.0998061	2.18696	0.0287454	0.0916136	FALSE	NoSigChange
ATAC	RLTR13D5	LTR	ERVK	J1.TSA.vs.J1.DMSO	14331.6	0.33961	0.0699068	4.85803	1.18557e-06	5.38387e-05	TRUE	SigIncrease
ATAC	RLTR13D6	LTR	ERVK	J1.TSA.vs.J1.DMSO	69190.1	-0.750427	0.125009	-6.00297	1.93743e-09	2.9914e-07	TRUE	SigDecrease
ATAC	RLTR13E	LTR	ERVK	J1.TSA.vs.J1.DMSO	37899.2	-0.851109	0.130777	-6.50807	7.61229e-11	2.35068e-08	TRUE	SigDecrease
ATAC	RLTR13F	LTR	ERVK	J1.TSA.vs.J1.DMSO	5672.48	-0.823209	0.107453	-7.66111	1.84328e-14	2.55123e-11	TRUE	SigDecrease
ATAC	RLTR13G	LTR	ERVK	J1.TSA.vs.J1.DMSO	43874.4	-0.896705	0.156101	-5.74438	9.22603e-09	1.0175e-06	TRUE	SigDecrease
ATAC	RLTR14	LTR	ERV1	J1.TSA.vs.J1.DMSO	19911.5	0.0974374	0.0423197	2.30241	0.0213118	0.0763468	FALSE	NoSigChange
ATAC	RLTR14-int	LTR	ERV1	J1.TSA.vs.J1.DMSO	21992.2	0.210231	0.0640686	3.28135	0.00103313	0.00927412	TRUE	SigIncrease
ATAC	RLTR14_RN	LTR	ERV1	J1.TSA.vs.J1.DMSO	9865.37	0.119237	0.0361481	3.29857	0.000971803	0.00882626	TRUE	SigIncrease
ATAC	RLTR15	LTR	ERVK	J1.TSA.vs.J1.DMSO	20627.5	0.161815	0.0519933	3.11222	0.00185686	0.0139577	TRUE	SigIncrease
ATAC	RLTR16	LTR	ERVK	J1.TSA.vs.J1.DMSO	19904.5	-0.021355	0.0445985	-0.478826	0.632062	0.721823	FALSE	NoSigChange
ATAC	RLTR16B_MM	LTR	ERVK	J1.TSA.vs.J1.DMSO	17615.8	-0.0479285	0.0911316	-0.525926	0.59894	0.693226	FALSE	NoSigChange
ATAC	RLTR16C_MM	LTR	ERVK	J1.TSA.vs.J1.DMSO	6672.93	0.0460579	0.050401	0.913829	0.360807	0.475742	FALSE	NoSigChange
ATAC	RLTR17	LTR	ERVK	J1.TSA.vs.J1.DMSO	66980.6	-0.0901573	0.100749	-0.894872	0.370855	0.484844	FALSE	NoSigChange
ATAC	RLTR17B_Mm	LTR	ERVK	J1.TSA.vs.J1.DMSO	88820.6	0.338885	0.145387	2.33093	0.0197573	0.0717771	FALSE	NoSigChange
ATAC	RLTR17C_Mm	LTR	ERVK	J1.TSA.vs.J1.DMSO	2837.47	-0.110047	0.0338134	-3.25453	0.0011358	0.00996409	TRUE	SigDecrease
ATAC	RLTR17D_Mm	LTR	ERVK	J1.TSA.vs.J1.DMSO	11212	0.278316	0.124013	2.24424	0.0248167	0.0847334	FALSE	NoSigChange
ATAC	RLTR18	LTR	ERVK	J1.TSA.vs.J1.DMSO	7781.04	0.105535	0.0519621	2.03101	0.0422544	0.115266	FALSE	NoSigChange
ATAC	RLTR18-int	LTR	ERVK	J1.TSA.vs.J1.DMSO	3712.62	0.11967	0.0822201	1.45548	0.145535	0.25135	FALSE	NoSigChange
ATAC	RLTR18B	LTR	ERVK	J1.TSA.vs.J1.DMSO	10821.4	0.0787139	0.0431554	1.82396	0.0681576	0.151855	FALSE	NoSigChange
ATAC	RLTR19	LTR	ERVK	J1.TSA.vs.J1.DMSO	9229.29	0.196208	0.0549322	3.57181	0.000354523	0.00417851	TRUE	SigIncrease
ATAC	RLTR19-int	LTR	ERVK	J1.TSA.vs.J1.DMSO	19381	0.118204	0.0592438	1.99521	0.0460195	0.121046	FALSE	NoSigChange
ATAC	RLTR19A	LTR	ERVK	J1.TSA.vs.J1.DMSO	1276.28	0.144162	0.0634971	2.27037	0.0231853	0.0813592	FALSE	NoSigChange
ATAC	RLTR19A2	LTR	ERVK	J1.TSA.vs.J1.DMSO	793.619	0.160038	0.0810815	1.9738	0.0484049	0.124355	FALSE	NoSigChange
ATAC	RLTR19B	LTR	ERVK	J1.TSA.vs.J1.DMSO	2274.01	0.131633	0.0672569	1.95716	0.0503286	0.127389	FALSE	NoSigChange
ATAC	RLTR19C	LTR	ERVK	J1.TSA.vs.J1.DMSO	2286.39	0.100385	0.0524648	1.91337	0.0557008	0.135223	FALSE	NoSigChange
ATAC	RLTR19D	LTR	ERVK	J1.TSA.vs.J1.DMSO	634.368	0.0718905	0.0832628	0.863416	0.387909	0.501792	FALSE	NoSigChange
ATAC	RLTR1A2_MM	LTR	ERV1	J1.TSA.vs.J1.DMSO	7098.96	0.0832228	0.0513487	1.62074	0.105074	0.204324	FALSE	NoSigChange
ATAC	RLTR1B	LTR	ERV1	J1.TSA.vs.J1.DMSO	32705.2	0.542543	0.140569	3.85962	0.000113564	0.00175343	TRUE	SigIncrease
ATAC	RLTR1B-int	LTR	ERV1	J1.TSA.vs.J1.DMSO	23700	0.270234	0.0713948	3.78506	0.000153672	0.00221748	TRUE	SigIncrease
ATAC	RLTR1C	LTR	ERV1	J1.TSA.vs.J1.DMSO	8725.78	0.281558	0.0588714	4.78259	1.73051e-06	7.22138e-05	TRUE	SigIncrease
ATAC	RLTR1D	LTR	ERV1	J1.TSA.vs.J1.DMSO	6081.35	0.19438	0.0566902	3.42881	0.000606228	0.00621611	TRUE	SigIncrease
ATAC	RLTR1D2_MM	LTR	ERV1	J1.TSA.vs.J1.DMSO	5973.08	0.26433	0.0751879	3.51559	0.000438782	0.00473955	TRUE	SigIncrease
ATAC	RLTR1E_MM	LTR	ERV1	J1.TSA.vs.J1.DMSO	1086.87	0.40166	0.0846678	4.74395	2.0959e-06	8.51599e-05	TRUE	SigIncrease
ATAC	RLTR1F_Mm	LTR	ERVK	J1.TSA.vs.J1.DMSO	3092.01	0.569842	0.103728	5.49362	3.9378e-08	3.19998e-06	TRUE	SigIncrease
ATAC	RLTR20A	LTR	ERVK	J1.TSA.vs.J1.DMSO	3894.12	0.0266906	0.0443296	0.602094	0.547112	0.650706	FALSE	NoSigChange
ATAC	RLTR20A1	LTR	ERVK	J1.TSA.vs.J1.DMSO	816.653	0.00187143	0.0484635	0.0386153	0.969197	0.973611	FALSE	NoSigChange
ATAC	RLTR20A2	LTR	ERVK	J1.TSA.vs.J1.DMSO	4209.09	0.0680771	0.0353522	1.92568	0.0541441	0.133331	FALSE	NoSigChange
ATAC	RLTR20A2B_MM	LTR	ERVK	J1.TSA.vs.J1.DMSO	7768.76	-0.0830822	0.0701511	-1.18433	0.236281	0.350787	FALSE	NoSigChange
ATAC	RLTR20A3_MM	LTR	ERVK	J1.TSA.vs.J1.DMSO	10689	0.0159804	0.0279389	0.571976	0.567338	0.667152	FALSE	NoSigChange
ATAC	RLTR20A4	LTR	ERVK	J1.TSA.vs.J1.DMSO	42994.1	0.183477	0.0724636	2.53199	0.0113418	0.0490526	TRUE	SigIncrease
ATAC	RLTR20B1	LTR	ERVK	J1.TSA.vs.J1.DMSO	7427.79	-0.011306	0.0278263	-0.406306	0.684518	0.760357	FALSE	NoSigChange
ATAC	RLTR20B2	LTR	ERVK	J1.TSA.vs.J1.DMSO	9636.69	0.0912596	0.0367524	2.48309	0.0130248	0.0542054	FALSE	NoSigChange
ATAC	RLTR20B3	LTR	ERVK	J1.TSA.vs.J1.DMSO	12537.1	0.0582166	0.0327378	1.77827	0.0753596	0.164112	FALSE	NoSigChange
ATAC	RLTR20B3A_MM	LTR	ERVK	J1.TSA.vs.J1.DMSO	10453.2	-0.0160846	0.0478303	-0.336285	0.736656	0.799896	FALSE	NoSigChange
ATAC	RLTR20B4_MM	LTR	ERVK	J1.TSA.vs.J1.DMSO	5633.22	-0.0169889	0.0307433	-0.552606	0.580533	0.674957	FALSE	NoSigChange
ATAC	RLTR20B5_MM	LTR	ERVK	J1.TSA.vs.J1.DMSO	12127.3	-0.0869286	0.0336498	-2.58333	0.00978507	0.0446987	TRUE	SigDecrease
ATAC	RLTR20C	LTR	ERVK	J1.TSA.vs.J1.DMSO	2571.13	-0.00521436	0.0474945	-0.109789	0.912577	0.933125	FALSE	NoSigChange
ATAC	RLTR20C1_MM	LTR	ERVK	J1.TSA.vs.J1.DMSO	21765.4	0.134846	0.0621299	2.17039	0.0299772	0.093884	FALSE	NoSigChange
ATAC	RLTR20C2_MM	LTR	ERVK	J1.TSA.vs.J1.DMSO	19295.1	0.15213	0.0424272	3.58567	0.000336212	0.00402165	TRUE	SigIncrease
ATAC	RLTR20D	LTR	ERVK	J1.TSA.vs.J1.DMSO	12334.8	-0.0650883	0.0758652	-0.857947	0.390922	0.504114	FALSE	NoSigChange
ATAC	RLTR21	LTR	ERVK	J1.TSA.vs.J1.DMSO	24389.8	0.313101	0.0969706	3.22882	0.00124301	0.0106623	TRUE	SigIncrease
ATAC	RLTR22_Mur	LTR	ERVK	J1.TSA.vs.J1.DMSO	23528.8	0.180026	0.101417	1.77511	0.0758796	0.164428	FALSE	NoSigChange
ATAC	RLTR22_Mus	LTR	ERVK	J1.TSA.vs.J1.DMSO	10518.2	0.222675	0.0891423	2.49797	0.0124908	0.0527388	FALSE	NoSigChange
ATAC	RLTR23	LTR	ERV1	J1.TSA.vs.J1.DMSO	33716.2	0.272823	0.0965566	2.82552	0.00472038	0.0265995	TRUE	SigIncrease
ATAC	RLTR24	LTR	ERV1	J1.TSA.vs.J1.DMSO	11495.1	0.0710451	0.0448778	1.58308	0.113404	0.213603	FALSE	NoSigChange
ATAC	RLTR24B_MM	LTR	ERV1	J1.TSA.vs.J1.DMSO	3946.79	0.235646	0.0554142	4.25245	2.11448e-05	0.000518214	TRUE	SigIncrease
ATAC	RLTR25A	LTR	ERVK	J1.TSA.vs.J1.DMSO	17958.4	0.0629472	0.0612912	1.02702	0.304411	0.419278	FALSE	NoSigChange
ATAC	RLTR25B	LTR	ERVK	J1.TSA.vs.J1.DMSO	31423.3	0.00474306	0.0516076	0.0919062	0.926773	0.942646	FALSE	NoSigChange
ATAC	RLTR26	LTR	ERVK	J1.TSA.vs.J1.DMSO	9097.09	-0.0151005	0.0718859	-0.210062	0.833619	0.867909	FALSE	NoSigChange
ATAC	RLTR26_Mus	LTR	ERVK	J1.TSA.vs.J1.DMSO	33898.1	-0.00640011	0.0693698	-0.0922609	0.926491	0.942646	FALSE	NoSigChange
ATAC	RLTR26B_MM	LTR	ERVK	J1.TSA.vs.J1.DMSO	7942.55	0.0911032	0.0287539	3.16838	0.00153293	0.0123273	TRUE	SigIncrease
ATAC	RLTR26C_MM	LTR	ERVK	J1.TSA.vs.J1.DMSO	7846.63	0.00964036	0.0364271	0.264648	0.79128	0.839104	FALSE	NoSigChange
ATAC	RLTR26D_MM	LTR	ERVK	J1.TSA.vs.J1.DMSO	3860.13	0.0531854	0.0413569	1.28601	0.19844	0.311373	FALSE	NoSigChange
ATAC	RLTR27	LTR	ERVK	J1.TSA.vs.J1.DMSO	21791.3	0.13348	0.0931049	1.43365	0.151672	0.257343	FALSE	NoSigChange
ATAC	RLTR28	LTR	ERVL	J1.TSA.vs.J1.DMSO	26691.6	0.018713	0.0330725	0.565818	0.571517	0.670025	FALSE	NoSigChange
ATAC	RLTR28B	LTR	ERVL	J1.TSA.vs.J1.DMSO	4717.01	-0.0304646	0.0307857	-0.989568	0.322385	0.440109	FALSE	NoSigChange
ATAC	RLTR3_Mm	LTR	ERVK	J1.TSA.vs.J1.DMSO	795.133	0.30978	0.0704148	4.39936	1.0857e-05	0.00032237	TRUE	SigIncrease
ATAC	RLTR30	LTR	ERV1	J1.TSA.vs.J1.DMSO	4369.59	-0.0841426	0.0305664	-2.75278	0.00590909	0.0320659	TRUE	SigDecrease
ATAC	RLTR30B_MM	LTR	ERV1	J1.TSA.vs.J1.DMSO	5414.79	0.0505332	0.0753542	0.670608	0.50247	0.612807	FALSE	NoSigChange
ATAC	RLTR30C_MM	LTR	ERV1	J1.TSA.vs.J1.DMSO	1326.85	0.116967	0.0751875	1.55567	0.119787	0.220304	FALSE	NoSigChange
ATAC	RLTR30D_MM	LTR	ERV1	J1.TSA.vs.J1.DMSO	2752.21	0.136048	0.0646824	2.10332	0.035438	0.104743	FALSE	NoSigChange
ATAC	RLTR30D_RN	LTR	ERV1	J1.TSA.vs.J1.DMSO	773.224	-0.178259	0.0764683	-2.33115	0.0197454	0.0717771	FALSE	NoSigChange
ATAC	RLTR30D2_MM	LTR	ERV1	J1.TSA.vs.J1.DMSO	7997.75	0.157061	0.0559937	2.80497	0.0050321	0.028253	TRUE	SigIncrease
ATAC	RLTR30E_MM	LTR	ERV1	J1.TSA.vs.J1.DMSO	6065.92	0.0960253	0.0686666	1.39843	0.161985	0.271821	FALSE	NoSigChange
ATAC	RLTR31_Mm	LTR	ERVK	J1.TSA.vs.J1.DMSO	1690.01	0.0543204	0.0818306	0.663816	0.506808	0.615666	FALSE	NoSigChange
ATAC	RLTR31_Mur	LTR	ERVK	J1.TSA.vs.J1.DMSO	4562.81	0.0883968	0.0339972	2.60012	0.009319	0.0429509	TRUE	SigIncrease
ATAC	RLTR31A_Mm	LTR	ERVK	J1.TSA.vs.J1.DMSO	4161.06	0.0534199	0.0755506	0.707075	0.47952	0.590414	FALSE	NoSigChange
ATAC	RLTR31B_Mm	LTR	ERVK	J1.TSA.vs.J1.DMSO	5713.27	0.107983	0.0506637	2.13136	0.0330594	0.10048	FALSE	NoSigChange
ATAC	RLTR31B2	LTR	ERVK	J1.TSA.vs.J1.DMSO	12159.3	0.0587165	0.0397492	1.47718	0.139629	0.245264	FALSE	NoSigChange
ATAC	RLTR31C_MM	LTR	ERVK	J1.TSA.vs.J1.DMSO	5988.46	0.117068	0.0501008	2.33665	0.0194574	0.0712912	FALSE	NoSigChange
ATAC	RLTR31D_MM	LTR	ERVK	J1.TSA.vs.J1.DMSO	38577.8	0.127274	0.0541323	2.35116	0.0187148	0.0705741	FALSE	NoSigChange
ATAC	RLTR31M	LTR	ERVK	J1.TSA.vs.J1.DMSO	3670.8	0.167577	0.0343188	4.88297	1.045e-06	4.88935e-05	TRUE	SigIncrease
ATAC	RLTR33	LTR	ERVK	J1.TSA.vs.J1.DMSO	16113	0.230287	0.0526709	4.37218	1.23013e-05	0.000339164	TRUE	SigIncrease
ATAC	RLTR34B_MM	LTR	ERVK	J1.TSA.vs.J1.DMSO	8462.84	0.0747683	0.0491479	1.52129	0.128187	0.230408	FALSE	NoSigChange
ATAC	RLTR34C_MM	LTR	ERVK	J1.TSA.vs.J1.DMSO	7010.65	-0.0102553	0.0519597	-0.197371	0.843537	0.877052	FALSE	NoSigChange
ATAC	RLTR34D_MM	LTR	ERVK	J1.TSA.vs.J1.DMSO	7422.34	0.0559285	0.0524852	1.0656	0.286603	0.401788	FALSE	NoSigChange
ATAC	RLTR35B_MM	LTR	ERVL	J1.TSA.vs.J1.DMSO	4929.75	0.051435	0.0409081	1.25733	0.208634	0.321167	FALSE	NoSigChange
ATAC	RLTR4_Mm	LTR	ERV1	J1.TSA.vs.J1.DMSO	3759.34	-0.0439369	0.114922	-0.382318	0.702226	0.771698	FALSE	NoSigChange
ATAC	RLTR4_MM-int	LTR	ERV1	J1.TSA.vs.J1.DMSO	22445.4	0.0219085	0.0926184	0.236545	0.81301	0.854518	FALSE	NoSigChange
ATAC	RLTR40	LTR	ERVK	J1.TSA.vs.J1.DMSO	21782.2	0.206173	0.097457	2.11553	0.0343848	0.102491	FALSE	NoSigChange
ATAC	RLTR41	LTR	ERV1	J1.TSA.vs.J1.DMSO	26124.6	0.105956	0.0852677	1.24263	0.214004	0.324899	FALSE	NoSigChange
ATAC	RLTR41A2	LTR	ERV1	J1.TSA.vs.J1.DMSO	13536.2	-0.0170912	0.109592	-0.155953	0.87607	0.902972	FALSE	NoSigChange
ATAC	RLTR41B	LTR	ERV1	J1.TSA.vs.J1.DMSO	978.726	0.0895154	0.0576453	1.55287	0.120455	0.220735	FALSE	NoSigChange
ATAC	RLTR41C	LTR	ERV1	J1.TSA.vs.J1.DMSO	5189.71	-0.412572	0.116523	-3.54068	0.000399103	0.00453099	TRUE	SigDecrease
ATAC	RLTR42	LTR	ERVK	J1.TSA.vs.J1.DMSO	2568.93	-0.0800933	0.062965	-1.27203	0.203363	0.316654	FALSE	NoSigChange
ATAC	RLTR42-int	LTR	ERVK	J1.TSA.vs.J1.DMSO	18832.2	0.107687	0.0493943	2.18015	0.0292461	0.0925327	FALSE	NoSigChange
ATAC	RLTR43A	LTR	ERVK	J1.TSA.vs.J1.DMSO	10.455	1.03597	0.435007	2.38149	0.0172428	0.0663794	FALSE	NoSigChange
ATAC	RLTR43C	LTR	ERVK	J1.TSA.vs.J1.DMSO	2105.17	0.246253	0.0791987	3.10931	0.00187523	0.0139873	TRUE	SigIncrease
ATAC	RLTR44-int	LTR	ERVK	J1.TSA.vs.J1.DMSO	9896.49	0.376599	0.0746672	5.0437	4.56627e-07	2.51797e-05	TRUE	SigIncrease
ATAC	RLTR44A	LTR	ERVK	J1.TSA.vs.J1.DMSO	4772.06	0.144434	0.0983815	1.4681	0.142077	0.247313	FALSE	NoSigChange
ATAC	RLTR44B	LTR	ERVK	J1.TSA.vs.J1.DMSO	5369.88	0.218477	0.101855	2.14498	0.0319547	0.0986762	FALSE	NoSigChange
ATAC	RLTR44C	LTR	ERVK	J1.TSA.vs.J1.DMSO	8398.07	0.112857	0.11338	0.995384	0.319549	0.43701	FALSE	NoSigChange
ATAC	RLTR44D	LTR	ERVK	J1.TSA.vs.J1.DMSO	2817.37	0.232146	0.107847	2.15256	0.0313536	0.0971236	FALSE	NoSigChange
ATAC	RLTR44E	LTR	ERVK	J1.TSA.vs.J1.DMSO	4434.02	0.128307	0.122908	1.04393	0.29652	0.410239	FALSE	NoSigChange
ATAC	RLTR45	LTR	ERVK	J1.TSA.vs.J1.DMSO	27217.2	-0.0487022	0.0633508	-0.76877	0.44203	0.555095	FALSE	NoSigChange
ATAC	RLTR45-int	LTR	ERVK	J1.TSA.vs.J1.DMSO	23820.5	0.245737	0.0579231	4.24246	2.21081e-05	0.000531992	TRUE	SigIncrease
ATAC	RLTR46	LTR	ERVK	J1.TSA.vs.J1.DMSO	1547.37	-0.0286914	0.125432	-0.228741	0.81907	0.857386	FALSE	NoSigChange
ATAC	RLTR46A	LTR	ERVK	J1.TSA.vs.J1.DMSO	1562.32	0.0759849	0.0954325	0.796216	0.425907	0.538134	FALSE	NoSigChange
ATAC	RLTR46A2	LTR	ERVK	J1.TSA.vs.J1.DMSO	2077.3	0.0294208	0.131664	0.223454	0.823183	0.85936	FALSE	NoSigChange
ATAC	RLTR46B	LTR	ERVK	J1.TSA.vs.J1.DMSO	1997.93	-0.0443117	0.0979444	-0.452416	0.650969	0.735257	FALSE	NoSigChange
ATAC	RLTR47	LTR	ERVK	J1.TSA.vs.J1.DMSO	2367.01	0.180249	0.0776861	2.32022	0.0203289	0.0735077	FALSE	NoSigChange
ATAC	RLTR47_MM	LTR	ERV1	J1.TSA.vs.J1.DMSO	379.264	0.0430783	0.118996	0.362016	0.71734	0.7844	FALSE	NoSigChange
ATAC	RLTR48A	LTR	ERV1	J1.TSA.vs.J1.DMSO	7789.71	0.16646	0.0406821	4.09173	4.28158e-05	0.000826345	TRUE	SigIncrease
ATAC	RLTR48B	LTR	ERV1	J1.TSA.vs.J1.DMSO	1437.95	-0.133701	0.0632547	-2.1137	0.0345412	0.102561	FALSE	NoSigChange
ATAC	RLTR48C	LTR	ERV1	J1.TSA.vs.J1.DMSO	1731.4	0.141145	0.0565745	2.49485	0.0126011	0.0529112	FALSE	NoSigChange
ATAC	RLTR49	LTR	ERVK	J1.TSA.vs.J1.DMSO	9513.03	0.086778	0.0386694	2.2441	0.0248261	0.0847334	FALSE	NoSigChange
ATAC	RLTR5_Mm	LTR	ERV1	J1.TSA.vs.J1.DMSO	6166.76	0.48037	0.0745153	6.4466	1.14389e-10	2.52309e-08	TRUE	SigIncrease
ATAC	RLTR50A	LTR	ERVK	J1.TSA.vs.J1.DMSO	913.629	0.183827	0.0661182	2.78028	0.00543114	0.029944	TRUE	SigIncrease
ATAC	RLTR50B	LTR	ERVK	J1.TSA.vs.J1.DMSO	4467.28	0.239885	0.0645823	3.71441	0.000203681	0.00276311	TRUE	SigIncrease
ATAC	RLTR51A_Mm	LTR	ERVK?	J1.TSA.vs.J1.DMSO	20868.9	0.0510478	0.034641	1.47362	0.140583	0.246379	FALSE	NoSigChange
ATAC	RLTR51B_Mm	LTR	ERVK?	J1.TSA.vs.J1.DMSO	9116.01	-0.109047	0.0588272	-1.85369	0.0637835	0.145715	FALSE	NoSigChange
ATAC	RLTR53_Mm	LTR	ERVK	J1.TSA.vs.J1.DMSO	5953.17	0.0698749	0.0518594	1.34739	0.177855	0.289365	FALSE	NoSigChange
ATAC	RLTR53B_Mm	LTR	ERVK	J1.TSA.vs.J1.DMSO	1869.8	-0.158172	0.0998282	-1.58444	0.113093	0.213603	FALSE	NoSigChange
ATAC	RLTR6-int	LTR	ERV1	J1.TSA.vs.J1.DMSO	55348.1	0.271075	0.0680121	3.98569	6.72831e-05	0.00116725	TRUE	SigIncrease
ATAC	RLTR6_Mm	LTR	ERV1	J1.TSA.vs.J1.DMSO	4515.14	0.0231611	0.058015	0.399226	0.689726	0.762303	FALSE	NoSigChange
ATAC	RLTR6B_Mm	LTR	ERV1	J1.TSA.vs.J1.DMSO	11279.3	0.122135	0.0634619	1.92455	0.0542862	0.133468	FALSE	NoSigChange
ATAC	RLTR6C_Mm	LTR	ERV1	J1.TSA.vs.J1.DMSO	1090.43	0.206979	0.078947	2.62175	0.00874796	0.0412219	TRUE	SigIncrease
ATAC	RLTR8	LTR	ERVK	J1.TSA.vs.J1.DMSO	2296.21	0.146639	0.0705573	2.07829	0.0376823	0.107148	FALSE	NoSigChange
ATAC	RLTR9A	LTR	ERVK	J1.TSA.vs.J1.DMSO	16467.9	-0.439802	0.154748	-2.84206	0.00448228	0.0258233	TRUE	SigDecrease
ATAC	RLTR9A2	LTR	ERVK	J1.TSA.vs.J1.DMSO	8575.78	-0.345094	0.133879	-2.57766	0.00994719	0.0450942	TRUE	SigDecrease
ATAC	RLTR9A3	LTR	ERVK	J1.TSA.vs.J1.DMSO	18156.1	-0.686142	0.106143	-6.46434	1.01739e-10	2.52309e-08	TRUE	SigDecrease
ATAC	RLTR9A3A	LTR	ERVK	J1.TSA.vs.J1.DMSO	5666.89	-0.605837	0.103385	-5.86003	4.62778e-09	5.95441e-07	TRUE	SigDecrease
ATAC	RLTR9A3B	LTR	ERVK	J1.TSA.vs.J1.DMSO	6312.93	-0.488713	0.0988994	-4.94152	7.75151e-07	3.8938e-05	TRUE	SigDecrease
ATAC	RLTR9A4	LTR	ERVK	J1.TSA.vs.J1.DMSO	281.042	-0.000543817	0.0992834	-0.00547742	0.99563	0.99563	FALSE	NoSigChange
ATAC	RLTR9B	LTR	ERVK	J1.TSA.vs.J1.DMSO	7001.8	-0.279274	0.102957	-2.71254	0.00667705	0.0342504	TRUE	SigDecrease
ATAC	RLTR9B2	LTR	ERVK	J1.TSA.vs.J1.DMSO	8777.86	-0.387074	0.133179	-2.90642	0.00365595	0.0222468	TRUE	SigDecrease
ATAC	RLTR9C	LTR	ERVK	J1.TSA.vs.J1.DMSO	10039.9	-0.143525	0.0995638	-1.44154	0.149433	0.255628	FALSE	NoSigChange
ATAC	RLTR9D	LTR	ERVK	J1.TSA.vs.J1.DMSO	31730.2	-0.347559	0.144261	-2.40924	0.0159857	0.0629642	FALSE	NoSigChange
ATAC	RLTR9D2	LTR	ERVK	J1.TSA.vs.J1.DMSO	10282.7	-0.535041	0.151627	-3.52866	0.000417672	0.00463947	TRUE	SigDecrease
ATAC	RLTR9E	LTR	ERVK	J1.TSA.vs.J1.DMSO	53930.7	-0.496674	0.152274	-3.26171	0.00110741	0.00977267	TRUE	SigDecrease
ATAC	RLTR9F	LTR	ERVK	J1.TSA.vs.J1.DMSO	12039.3	-0.335275	0.106916	-3.13587	0.00171344	0.0132112	TRUE	SigDecrease
ATAC	RLTRETN_Mm	LTR	ERVK	J1.TSA.vs.J1.DMSO	44126.4	-0.0349645	0.127175	-0.274932	0.783368	0.834861	FALSE	NoSigChange
ATAC	RMER10A	LTR	ERVL	J1.TSA.vs.J1.DMSO	70428.9	-0.178136	0.0647273	-2.7521	0.00592143	0.0320659	TRUE	SigDecrease
ATAC	RMER10B	LTR	ERVL	J1.TSA.vs.J1.DMSO	41676.4	-0.186787	0.0681001	-2.74282	0.00609137	0.0322322	TRUE	SigDecrease
ATAC	RMER12	LTR	ERVK	J1.TSA.vs.J1.DMSO	23294.1	0.162132	0.0948397	1.70954	0.087351	0.179563	FALSE	NoSigChange
ATAC	RMER12B	LTR	ERVK	J1.TSA.vs.J1.DMSO	15823.8	0.187185	0.0636065	2.94286	0.003252	0.0210087	TRUE	SigIncrease
ATAC	RMER12C	LTR	ERVK	J1.TSA.vs.J1.DMSO	25042.2	0.125298	0.0865286	1.44806	0.147601	0.253499	FALSE	NoSigChange
ATAC	RMER13A	LTR	ERVK	J1.TSA.vs.J1.DMSO	23578.3	0.154453	0.0373908	4.13078	3.61533e-05	0.000734484	TRUE	SigIncrease
ATAC	RMER13A1	LTR	ERVK	J1.TSA.vs.J1.DMSO	22275.8	0.0937711	0.035637	2.63129	0.00850622	0.0406613	TRUE	SigIncrease
ATAC	RMER13A2	LTR	ERVK	J1.TSA.vs.J1.DMSO	29439.2	0.0779416	0.0300617	2.59273	0.00952188	0.0436255	TRUE	SigIncrease
ATAC	RMER13B	LTR	ERVK	J1.TSA.vs.J1.DMSO	64342.4	0.109424	0.0545957	2.00426	0.0450423	0.119183	FALSE	NoSigChange
ATAC	RMER15	LTR	ERVL	J1.TSA.vs.J1.DMSO	144578	0.109201	0.0398055	2.74337	0.00608121	0.0322322	TRUE	SigIncrease
ATAC	RMER15-int	LTR	ERVL	J1.TSA.vs.J1.DMSO	33402.9	0.0956196	0.0531056	1.80056	0.0717727	0.157867	FALSE	NoSigChange
ATAC	RMER16	LTR	ERVK	J1.TSA.vs.J1.DMSO	5311.4	0.140183	0.0519371	2.69908	0.0069531	0.0350924	TRUE	SigIncrease
ATAC	RMER16-int	LTR	ERVK	J1.TSA.vs.J1.DMSO	34621.8	0.0530864	0.0834761	0.635947	0.524811	0.63128	FALSE	NoSigChange
ATAC	RMER16_Mm	LTR	ERVK	J1.TSA.vs.J1.DMSO	5760.95	0.0638836	0.0666365	0.958689	0.337716	0.4554	FALSE	NoSigChange
ATAC	RMER16A2	LTR	ERVK	J1.TSA.vs.J1.DMSO	2854.34	-0.120713	0.0649713	-1.85795	0.0631764	0.145588	FALSE	NoSigChange
ATAC	RMER16A3	LTR	ERVK	J1.TSA.vs.J1.DMSO	5992.44	-0.37809	0.0748442	-5.05169	4.37927e-07	2.50429e-05	TRUE	SigDecrease
ATAC	RMER16B	LTR	ERVK	J1.TSA.vs.J1.DMSO	1671.35	-0.536872	0.0793935	-6.76216	1.35952e-11	5.24774e-09	TRUE	SigDecrease
ATAC	RMER16B2	LTR	ERVK	J1.TSA.vs.J1.DMSO	4984.92	-0.131479	0.091336	-1.43951	0.150007	0.255923	FALSE	NoSigChange
ATAC	RMER16B3	LTR	ERVK	J1.TSA.vs.J1.DMSO	822.896	0.0321228	0.0690349	0.465313	0.641707	0.727991	FALSE	NoSigChange
ATAC	RMER16C	LTR	ERVK	J1.TSA.vs.J1.DMSO	1879.1	0.150142	0.0495621	3.02936	0.00245069	0.0168171	TRUE	SigIncrease
ATAC	RMER17A	LTR	ERVK	J1.TSA.vs.J1.DMSO	36743.5	0.224218	0.0539257	4.1579	3.21185e-05	0.000678022	TRUE	SigIncrease
ATAC	RMER17A-int	LTR	ERVK	J1.TSA.vs.J1.DMSO	7436.31	0.0699306	0.0656833	1.06466	0.287029	0.401788	FALSE	NoSigChange
ATAC	RMER17A2	LTR	ERVK	J1.TSA.vs.J1.DMSO	49460.4	0.22304	0.0581673	3.83445	0.000125844	0.00188644	TRUE	SigIncrease
ATAC	RMER17B	LTR	ERVK	J1.TSA.vs.J1.DMSO	112486	-0.0331361	0.0820634	-0.403787	0.68637	0.761318	FALSE	NoSigChange
ATAC	RMER17B2	LTR	ERVK	J1.TSA.vs.J1.DMSO	24416.1	0.0179284	0.0669174	0.267919	0.788762	0.837027	FALSE	NoSigChange
ATAC	RMER17C	LTR	ERVK	J1.TSA.vs.J1.DMSO	100417	-0.156713	0.0745243	-2.10284	0.0354796	0.104743	FALSE	NoSigChange
ATAC	RMER17C-int	LTR	ERVK	J1.TSA.vs.J1.DMSO	26275.5	0.107048	0.0265341	4.03435	5.47533e-05	0.000983013	TRUE	SigIncrease
ATAC	RMER17C2	LTR	ERVK	J1.TSA.vs.J1.DMSO	34433.6	-0.0595191	0.0553784	-1.07477	0.282477	0.3994	FALSE	NoSigChange
ATAC	RMER17D	LTR	ERVK	J1.TSA.vs.J1.DMSO	17744.9	0.294334	0.0625184	4.70796	2.50205e-06	9.52111e-05	TRUE	SigIncrease
ATAC	RMER17D2	LTR	ERVK	J1.TSA.vs.J1.DMSO	32495.2	0.272673	0.0594524	4.58641	4.50927e-06	0.000154718	TRUE	SigIncrease
ATAC	RMER19A	LTR	ERVK	J1.TSA.vs.J1.DMSO	28340.6	0.152397	0.0498896	3.05468	0.00225304	0.0159573	TRUE	SigIncrease
ATAC	RMER19B	LTR	ERVK	J1.TSA.vs.J1.DMSO	98655.2	0.129675	0.0368868	3.51548	0.000438961	0.00473955	TRUE	SigIncrease
ATAC	RMER19B2	LTR	ERVK	J1.TSA.vs.J1.DMSO	26671.6	0.221848	0.076584	2.8968	0.00376991	0.0227373	TRUE	SigIncrease
ATAC	RMER19C	LTR	ERVK	J1.TSA.vs.J1.DMSO	32216.5	0.162142	0.0578581	2.80241	0.00507221	0.0282725	TRUE	SigIncrease
ATAC	RMER1A	Other	Other	J1.TSA.vs.J1.DMSO	91743.5	0.144878	0.0372992	3.88423	0.000102657	0.00161736	TRUE	SigIncrease
ATAC	RMER1B	Other	Other	J1.TSA.vs.J1.DMSO	133500	0.162018	0.0344651	4.70092	2.58994e-06	9.52111e-05	TRUE	SigIncrease
ATAC	RMER1C	Other	Other	J1.TSA.vs.J1.DMSO	55063.4	0.244109	0.0644238	3.78912	0.000151183	0.00220214	TRUE	SigIncrease
ATAC	RMER2	LTR	ERV1	J1.TSA.vs.J1.DMSO	29742.1	0.093792	0.0291016	3.22292	0.00126891	0.0107648	TRUE	SigIncrease
ATAC	RMER20A	LTR	ERVK	J1.TSA.vs.J1.DMSO	19975.1	-0.0381574	0.0409863	-0.93098	0.351864	0.467135	FALSE	NoSigChange
ATAC	RMER20B	LTR	ERVK	J1.TSA.vs.J1.DMSO	27955.6	0.00227175	0.0360317	0.0630486	0.949728	0.958418	FALSE	NoSigChange
ATAC	RMER20C_Mm	LTR	ERVK	J1.TSA.vs.J1.DMSO	25622.7	0.0499855	0.03259	1.53377	0.125087	0.226417	FALSE	NoSigChange
ATAC	RMER21A	LTR	ERV1	J1.TSA.vs.J1.DMSO	17474.7	-0.313021	0.0955466	-3.27611	0.00105248	0.00939322	TRUE	SigDecrease
ATAC	RMER21B	LTR	ERV1	J1.TSA.vs.J1.DMSO	17149.4	-0.0158849	0.0729567	-0.217731	0.827639	0.862846	FALSE	NoSigChange
ATAC	RMER30	DNA	hAT-Charlie	J1.TSA.vs.J1.DMSO	15902.5	0.105816	0.0645784	1.63856	0.101305	0.199509	FALSE	NoSigChange
ATAC	RMER3D-int	LTR	ERVK	J1.TSA.vs.J1.DMSO	25799.6	0.238022	0.092428	2.57522	0.0100177	0.0450942	TRUE	SigIncrease
ATAC	RMER3D2	LTR	ERVK	J1.TSA.vs.J1.DMSO	10.501	0.878101	0.424674	2.06771	0.0386677	0.108513	FALSE	NoSigChange
ATAC	RMER3D3	LTR	ERVK	J1.TSA.vs.J1.DMSO	85.7418	-0.475878	0.174105	-2.73328	0.00627075	0.0328205	TRUE	SigDecrease
ATAC	RMER3D4	LTR	ERVK	J1.TSA.vs.J1.DMSO	7.86499	-0.208285	0.493845	-0.421763	0.673198	0.752571	FALSE	NoSigChange
ATAC	RMER4A	LTR	ERVK	J1.TSA.vs.J1.DMSO	19884.6	0.123084	0.0655404	1.87799	0.0603825	0.141903	FALSE	NoSigChange
ATAC	RMER4B	LTR	ERVK	J1.TSA.vs.J1.DMSO	42355.4	0.0865194	0.0535874	1.61455	0.106409	0.205604	FALSE	NoSigChange
ATAC	RMER5	LTR	ERV1	J1.TSA.vs.J1.DMSO	63034.6	0.103973	0.0546495	1.90253	0.0571013	0.137328	FALSE	NoSigChange
ATAC	RMER6-int	LTR	ERVK	J1.TSA.vs.J1.DMSO	5161.31	0.3168	0.129254	2.45099	0.0142464	0.0583461	FALSE	NoSigChange
ATAC	RMER6A	LTR	ERVK	J1.TSA.vs.J1.DMSO	60942.9	0.158425	0.0390006	4.06212	4.86295e-05	0.000915659	TRUE	SigIncrease
ATAC	RMER6B	LTR	ERVK	J1.TSA.vs.J1.DMSO	12752.6	0.0057011	0.0329984	0.172769	0.862833	0.892905	FALSE	NoSigChange
ATAC	RMER6BA	LTR	ERVK	J1.TSA.vs.J1.DMSO	8333.4	0.0597957	0.0405256	1.4755	0.140077	0.245771	FALSE	NoSigChange
ATAC	RMER6C	LTR	ERVK	J1.TSA.vs.J1.DMSO	59993.4	0.350546	0.0819524	4.27744	1.89057e-05	0.000476427	TRUE	SigIncrease
ATAC	RMER6D	LTR	ERVK	J1.TSA.vs.J1.DMSO	24626.1	0.351571	0.0784007	4.48429	7.31573e-06	0.000235323	TRUE	SigIncrease
ATAC	RNERVK23-int	LTR	ERVK	J1.TSA.vs.J1.DMSO	307.175	0.246162	0.0780935	3.15214	0.00162078	0.0128332	TRUE	SigIncrease
ATAC	RNLTR23	LTR	ERVK	J1.TSA.vs.J1.DMSO	21.1643	-0.147487	0.275764	-0.53483	0.592767	0.686721	FALSE	NoSigChange
ATAC	RodERV21-int	LTR	ERV1	J1.TSA.vs.J1.DMSO	29980.4	0.170487	0.0431046	3.9552	7.64717e-05	0.00128339	TRUE	SigIncrease
ATAC	RSINE1	SINE	B4	J1.TSA.vs.J1.DMSO	600744	0.0501682	0.0482158	1.04049	0.298111	0.411702	FALSE	NoSigChange
ATAC	SRV_MM-int	LTR	ERVK	J1.TSA.vs.J1.DMSO	2421.36	0.199376	0.0807688	2.46847	0.0135691	0.0558684	FALSE	NoSigChange
ATAC	SSU-rRNA_Hsa	rRNA	rRNA	J1.TSA.vs.J1.DMSO	2835.56	-0.0980054	0.305761	-0.320529	0.748567	0.809776	FALSE	NoSigChange
ATAC	SUBTEL_sa	Satellite	Satellite	J1.TSA.vs.J1.DMSO	1802.73	-0.262105	0.172165	-1.52241	0.127908	0.230174	FALSE	NoSigChange
ATAC	SYNREP_MM	Satellite	Satellite	J1.TSA.vs.J1.DMSO	1819.53	0.339079	0.159267	2.12899	0.0332547	0.100835	FALSE	NoSigChange
ATAC	T-rich	Low_complexity	Low_complexity	J1.TSA.vs.J1.DMSO	48593.8	0.211098	0.1155	1.8277	0.0675952	0.151476	FALSE	NoSigChange
ATAC	TAAAAAn	Simple_repeat	Simple_repeat	J1.TSA.vs.J1.DMSO	794.215	0.564441	0.29917	1.88669	0.0592019	0.140411	FALSE	NoSigChange
ATAC	TAAAAn	Simple_repeat	Simple_repeat	J1.TSA.vs.J1.DMSO	3785.48	0.748595	0.336597	2.22401	0.0261478	0.0870185	FALSE	NoSigChange
ATAC	TAAAGn	Simple_repeat	Simple_repeat	J1.TSA.vs.J1.DMSO	45.3597	0.328027	0.197472	1.66113	0.0966875	0.192875	FALSE	NoSigChange
ATAC	TAAAn	Simple_repeat	Simple_repeat	J1.TSA.vs.J1.DMSO	16708.8	0.726472	0.348947	2.0819	0.0373519	0.107148	FALSE	NoSigChange
ATAC	TAAGn	Simple_repeat	Simple_repeat	J1.TSA.vs.J1.DMSO	927.555	0.477745	0.15151	3.15321	0.00161484	0.0128332	TRUE	SigIncrease
ATAC	TAAn	Simple_repeat	Simple_repeat	J1.TSA.vs.J1.DMSO	7803.26	0.794711	0.367191	2.1643	0.0304416	0.0950125	FALSE	NoSigChange
ATAC	TAATGn	Simple_repeat	Simple_repeat	J1.TSA.vs.J1.DMSO	117.883	0.236286	0.167421	1.41133	0.158148	0.265702	FALSE	NoSigChange
ATAC	TACGGn	Simple_repeat	Simple_repeat	J1.TSA.vs.J1.DMSO	12.6205	0.161936	0.404672	0.400165	0.689035	0.762084	FALSE	NoSigChange
ATAC	TACTGn	Simple_repeat	Simple_repeat	J1.TSA.vs.J1.DMSO	579.76	0.126373	0.0778105	1.62412	0.10435	0.203561	FALSE	NoSigChange
ATAC	TAGAn	Simple_repeat	Simple_repeat	J1.TSA.vs.J1.DMSO	38300.8	0.376031	0.191675	1.96181	0.0497841	0.126816	FALSE	NoSigChange
ATAC	TAGGGn	Simple_repeat	Simple_repeat	J1.TSA.vs.J1.DMSO	131.894	0.0138404	0.140066	0.0988133	0.921287	0.939961	FALSE	NoSigChange
ATAC	TAGGn	Simple_repeat	Simple_repeat	J1.TSA.vs.J1.DMSO	1553.53	0.150053	0.0821491	1.8266	0.0677606	0.151627	FALSE	NoSigChange
ATAC	TAGn	Simple_repeat	Simple_repeat	J1.TSA.vs.J1.DMSO	2416.93	0.262409	0.121387	2.16175	0.0306371	0.0951784	FALSE	NoSigChange
ATAC	TAGTGn	Simple_repeat	Simple_repeat	J1.TSA.vs.J1.DMSO	964.011	0.258106	0.0732641	3.52295	0.000426767	0.00470663	TRUE	SigIncrease
ATAC	TAn	Simple_repeat	Simple_repeat	J1.TSA.vs.J1.DMSO	46637	0.833462	0.389589	2.13934	0.0324083	0.09948	FALSE	NoSigChange
ATAC	TATAAn	Simple_repeat	Simple_repeat	J1.TSA.vs.J1.DMSO	1627.24	1.11947	0.504457	2.21916	0.026476	0.087162	FALSE	NoSigChange
ATAC	TATAGn	Simple_repeat	Simple_repeat	J1.TSA.vs.J1.DMSO	708.884	0.339689	0.190582	1.78238	0.0746873	0.162877	FALSE	NoSigChange
ATAC	TATATGn	Simple_repeat	Simple_repeat	J1.TSA.vs.J1.DMSO	12039.5	0.416849	0.175871	2.37019	0.0177789	0.0677795	FALSE	NoSigChange
ATAC	TATCGn	Simple_repeat	Simple_repeat	J1.TSA.vs.J1.DMSO	11.108	0.328849	0.403633	0.814723	0.415231	0.527234	FALSE	NoSigChange
ATAC	TATGn	Simple_repeat	Simple_repeat	J1.TSA.vs.J1.DMSO	27757.1	0.272419	0.118049	2.30769	0.0210165	0.0755454	FALSE	NoSigChange
ATAC	TATTGn	Simple_repeat	Simple_repeat	J1.TSA.vs.J1.DMSO	469.206	0.267825	0.111674	2.39828	0.0164723	0.0645514	FALSE	NoSigChange
ATAC	TCCAn	Simple_repeat	Simple_repeat	J1.TSA.vs.J1.DMSO	13284.3	0.149181	0.0946625	1.57593	0.115043	0.215305	FALSE	NoSigChange
ATAC	TCCCCn	Simple_repeat	Simple_repeat	J1.TSA.vs.J1.DMSO	6390.25	0.022221	0.0799798	0.277833	0.781141	0.834081	FALSE	NoSigChange
ATAC	TCCCGn	Simple_repeat	Simple_repeat	J1.TSA.vs.J1.DMSO	429.431	-0.294743	0.178951	-1.64706	0.0995449	0.19724	FALSE	NoSigChange
ATAC	TCCCn	Simple_repeat	Simple_repeat	J1.TSA.vs.J1.DMSO	24480.9	-0.160545	0.0671355	-2.39135	0.0167865	0.0652855	FALSE	NoSigChange
ATAC	TCCGGn	Simple_repeat	Simple_repeat	J1.TSA.vs.J1.DMSO	79.3185	-0.0981878	0.244415	-0.401725	0.687886	0.762084	FALSE	NoSigChange
ATAC	TCCGn	Simple_repeat	Simple_repeat	J1.TSA.vs.J1.DMSO	993.234	-0.326891	0.150429	-2.17306	0.029776	0.0934444	FALSE	NoSigChange
ATAC	TCCn	Simple_repeat	Simple_repeat	J1.TSA.vs.J1.DMSO	33113	-0.00645434	0.0656624	-0.0982958	0.921697	0.939961	FALSE	NoSigChange
ATAC	TCCTGn	Simple_repeat	Simple_repeat	J1.TSA.vs.J1.DMSO	835.3	0.0727095	0.0848555	0.856862	0.391521	0.504177	FALSE	NoSigChange
ATAC	TCGGGn	Simple_repeat	Simple_repeat	J1.TSA.vs.J1.DMSO	225.377	-0.458648	0.202423	-2.26579	0.0234639	0.0817795	FALSE	NoSigChange
ATAC	TCGn	Simple_repeat	Simple_repeat	J1.TSA.vs.J1.DMSO	791.663	-0.287571	0.149614	-1.92208	0.0545952	0.134013	FALSE	NoSigChange
ATAC	TCGTGn	Simple_repeat	Simple_repeat	J1.TSA.vs.J1.DMSO	10.1738	-0.394957	0.461938	-0.855001	0.392551	0.504661	FALSE	NoSigChange
ATAC	TCn	Simple_repeat	Simple_repeat	J1.TSA.vs.J1.DMSO	147518	0.132929	0.0597887	2.22331	0.0261949	0.0870185	FALSE	NoSigChange
ATAC	TCTAn	Simple_repeat	Simple_repeat	J1.TSA.vs.J1.DMSO	37681.6	0.363805	0.19627	1.85359	0.0637976	0.145715	FALSE	NoSigChange
ATAC	TCTCCCn	Simple_repeat	Simple_repeat	J1.TSA.vs.J1.DMSO	9845.14	0.134985	0.0401478	3.36221	0.000773214	0.00732419	TRUE	SigIncrease
ATAC	TCTCCn	Simple_repeat	Simple_repeat	J1.TSA.vs.J1.DMSO	7062.11	0.211934	0.0526797	4.02306	5.74474e-05	0.00100794	TRUE	SigIncrease
ATAC	TCTCGn	Simple_repeat	Simple_repeat	J1.TSA.vs.J1.DMSO	51.2162	0.163835	0.185127	0.884989	0.376162	0.490951	FALSE	NoSigChange
ATAC	TCTCTGn	Simple_repeat	Simple_repeat	J1.TSA.vs.J1.DMSO	25393.6	0.177233	0.0426531	4.15523	3.24959e-05	0.000678022	TRUE	SigIncrease
ATAC	TCTGn	Simple_repeat	Simple_repeat	J1.TSA.vs.J1.DMSO	25676.4	0.123155	0.0554069	2.22274	0.0262332	0.0870185	FALSE	NoSigChange
ATAC	TCTTGn	Simple_repeat	Simple_repeat	J1.TSA.vs.J1.DMSO	594.285	0.575357	0.0999523	5.75632	8.59684e-09	1.0175e-06	TRUE	SigIncrease
ATAC	TGAAn	Simple_repeat	Simple_repeat	J1.TSA.vs.J1.DMSO	7180.51	0.101057	0.0796776	1.26832	0.204684	0.31762	FALSE	NoSigChange
ATAC	TGAGn	Simple_repeat	Simple_repeat	J1.TSA.vs.J1.DMSO	2340.49	0.05205	0.048564	1.07178	0.283818	0.400197	FALSE	NoSigChange
ATAC	TGGAn	Simple_repeat	Simple_repeat	J1.TSA.vs.J1.DMSO	14570.4	0.100106	0.0812882	1.2315	0.218136	0.329552	FALSE	NoSigChange
ATAC	TGGGGGn	Simple_repeat	Simple_repeat	J1.TSA.vs.J1.DMSO	8976.86	-0.0584688	0.101454	-0.576306	0.564409	0.665735	FALSE	NoSigChange
ATAC	TGGGn	Simple_repeat	Simple_repeat	J1.TSA.vs.J1.DMSO	3954.09	0.149747	0.0582745	2.56969	0.010179	0.0454229	TRUE	SigIncrease
ATAC	TGGn	Simple_repeat	Simple_repeat	J1.TSA.vs.J1.DMSO	17107.1	0.0238267	0.0424797	0.560895	0.574869	0.671913	FALSE	NoSigChange
ATAC	TGn	Simple_repeat	Simple_repeat	J1.TSA.vs.J1.DMSO	533786	0.162221	0.0567498	2.85853	0.00425604	0.024889	TRUE	SigIncrease
ATAC	Tigger1	DNA	TcMar-Tigger	J1.TSA.vs.J1.DMSO	8811.82	0.182304	0.0939568	1.9403	0.0523437	0.129725	FALSE	NoSigChange
ATAC	Tigger10	DNA	TcMar-Tigger	J1.TSA.vs.J1.DMSO	1510.53	0.104798	0.0753097	1.39156	0.164055	0.273838	FALSE	NoSigChange
ATAC	Tigger11a	DNA	TcMar-Tigger	J1.TSA.vs.J1.DMSO	535.501	-0.0408595	0.0859198	-0.475553	0.634393	0.72288	FALSE	NoSigChange
ATAC	Tigger12	DNA	TcMar-Tigger	J1.TSA.vs.J1.DMSO	859.4	-0.0358177	0.0637798	-0.561584	0.574399	0.671873	FALSE	NoSigChange
ATAC	Tigger12A	DNA	TcMar-Tigger	J1.TSA.vs.J1.DMSO	468.021	0.182829	0.085433	2.14003	0.0323523	0.09948	FALSE	NoSigChange
ATAC	Tigger12c	DNA	TcMar-Tigger	J1.TSA.vs.J1.DMSO	479.276	0.167592	0.0878165	1.90843	0.0563356	0.136336	FALSE	NoSigChange
ATAC	Tigger13a	DNA	TcMar-Tigger	J1.TSA.vs.J1.DMSO	3739.93	0.151532	0.0920315	1.64652	0.0996563	0.19724	FALSE	NoSigChange
ATAC	Tigger14a	DNA	TcMar-Tigger	J1.TSA.vs.J1.DMSO	918.363	0.221989	0.0981232	2.26235	0.0236758	0.0821417	FALSE	NoSigChange
ATAC	Tigger15a	DNA	TcMar-Tigger	J1.TSA.vs.J1.DMSO	3998.48	0.0576244	0.0661037	0.871728	0.383357	0.497824	FALSE	NoSigChange
ATAC	Tigger16a	DNA	TcMar-Tigger	J1.TSA.vs.J1.DMSO	1871.61	0.0215357	0.0494331	0.435653	0.663089	0.744079	FALSE	NoSigChange
ATAC	Tigger16b	DNA	TcMar-Tigger	J1.TSA.vs.J1.DMSO	952.239	-0.00429635	0.0761605	-0.0564119	0.955014	0.962494	FALSE	NoSigChange
ATAC	Tigger17	DNA	TcMar-Tigger	J1.TSA.vs.J1.DMSO	2147.77	0.0451138	0.0527381	0.855432	0.392312	0.504661	FALSE	NoSigChange
ATAC	Tigger17a	DNA	TcMar-Tigger	J1.TSA.vs.J1.DMSO	7858.14	0.11033	0.0692412	1.59342	0.111066	0.211988	FALSE	NoSigChange
ATAC	Tigger17b	DNA	TcMar-Tigger	J1.TSA.vs.J1.DMSO	457.74	0.132185	0.106576	1.24028	0.214872	0.325669	FALSE	NoSigChange
ATAC	Tigger17c	DNA	TcMar-Tigger	J1.TSA.vs.J1.DMSO	4326.98	0.0425484	0.05959	0.71402	0.475215	0.586985	FALSE	NoSigChange
ATAC	Tigger18a	DNA	TcMar-Tigger	J1.TSA.vs.J1.DMSO	1566.01	-0.0822403	0.0865777	-0.949902	0.342162	0.458529	FALSE	NoSigChange
ATAC	Tigger19a	DNA	TcMar-Tigger	J1.TSA.vs.J1.DMSO	3564.17	-0.0332483	0.0579778	-0.573467	0.566328	0.66698	FALSE	NoSigChange
ATAC	Tigger1a_Art	DNA	TcMar-Tigger	J1.TSA.vs.J1.DMSO	135.461	0.206649	0.143236	1.44271	0.149101	0.255507	FALSE	NoSigChange
ATAC	Tigger20a	DNA	TcMar-Tigger	J1.TSA.vs.J1.DMSO	1183.17	-0.0582993	0.0777163	-0.750155	0.453162	0.565628	FALSE	NoSigChange
ATAC	Tigger2b	DNA	TcMar-Tigger	J1.TSA.vs.J1.DMSO	965.589	0.111929	0.113338	0.987575	0.323361	0.440661	FALSE	NoSigChange
ATAC	Tigger5	DNA	TcMar-Tigger	J1.TSA.vs.J1.DMSO	11486.5	0.138519	0.0757321	1.82906	0.0673902	0.151432	FALSE	NoSigChange
ATAC	Tigger5b	DNA	TcMar-Tigger	J1.TSA.vs.J1.DMSO	11822.5	0.149034	0.0794827	1.87505	0.060786	0.142418	FALSE	NoSigChange
ATAC	Tigger6a	DNA	TcMar-Tigger	J1.TSA.vs.J1.DMSO	2969.78	0.107229	0.0794482	1.34967	0.177122	0.288477	FALSE	NoSigChange
ATAC	Tigger6b	DNA	TcMar-Tigger	J1.TSA.vs.J1.DMSO	1236.11	0.166498	0.0880608	1.89072	0.058662	0.139712	FALSE	NoSigChange
ATAC	Tigger7	DNA	TcMar-Tigger	J1.TSA.vs.J1.DMSO	31807.3	0.143407	0.0757896	1.89217	0.0584679	0.139699	FALSE	NoSigChange
ATAC	Tigger8	DNA	TcMar-Tigger	J1.TSA.vs.J1.DMSO	687.161	0.16179	0.129216	1.25208	0.210539	0.322813	FALSE	NoSigChange
ATAC	Tigger9a	DNA	TcMar-Tigger	J1.TSA.vs.J1.DMSO	1127.57	0.0196207	0.0752318	0.260803	0.794244	0.841093	FALSE	NoSigChange
ATAC	Tigger9b	DNA	TcMar-Tigger	J1.TSA.vs.J1.DMSO	2369.26	0.0884151	0.0779052	1.13491	0.256414	0.371392	FALSE	NoSigChange
ATAC	Tn	Simple_repeat	Simple_repeat	J1.TSA.vs.J1.DMSO	31010.8	0.0593878	0.106256	0.558911	0.576223	0.672986	FALSE	NoSigChange
ATAC	tRNA-Ala-GCA	tRNA	tRNA	J1.TSA.vs.J1.DMSO	3103.4	-0.0550773	0.0499892	-1.10178	0.270556	0.386437	FALSE	NoSigChange
ATAC	tRNA-Ala-GCG	tRNA	tRNA	J1.TSA.vs.J1.DMSO	1226.76	-0.188861	0.0658639	-2.86744	0.00413809	0.0244797	TRUE	SigDecrease
ATAC	tRNA-Ala-GCY	tRNA	tRNA	J1.TSA.vs.J1.DMSO	908.475	-0.567677	0.184384	-3.07877	0.00207858	0.0150107	TRUE	SigDecrease
ATAC	tRNA-Ala-GCY_	tRNA	tRNA	J1.TSA.vs.J1.DMSO	10281.8	-0.00564756	0.0509238	-0.110902	0.911694	0.93284	FALSE	NoSigChange
ATAC	tRNA-Arg-AGA	tRNA	tRNA	J1.TSA.vs.J1.DMSO	614.343	-0.488971	0.151332	-3.23112	0.00123307	0.0106424	TRUE	SigDecrease
ATAC	tRNA-Arg-AGG	tRNA	tRNA	J1.TSA.vs.J1.DMSO	767.452	-0.61065	0.139655	-4.37257	1.2279e-05	0.000339164	TRUE	SigDecrease
ATAC	tRNA-Arg-CGA	tRNA	tRNA	J1.TSA.vs.J1.DMSO	263.288	-0.597516	0.174397	-3.42618	0.000612142	0.00621807	TRUE	SigDecrease
ATAC	tRNA-Arg-CGA_	tRNA	tRNA	J1.TSA.vs.J1.DMSO	176.286	-0.539733	0.204573	-2.63834	0.00833142	0.0403251	TRUE	SigDecrease
ATAC	tRNA-Arg-CGG	tRNA	tRNA	J1.TSA.vs.J1.DMSO	306.734	-0.71479	0.169208	-4.22433	2.39651e-05	0.000560639	TRUE	SigDecrease
ATAC	tRNA-Arg-CGY_	tRNA	tRNA	J1.TSA.vs.J1.DMSO	691.286	-0.424022	0.145151	-2.92124	0.00348636	0.0219568	TRUE	SigDecrease
ATAC	tRNA-Asn-AAC	tRNA	tRNA	J1.TSA.vs.J1.DMSO	982.431	-0.692542	0.183962	-3.76458	0.000166828	0.00236315	TRUE	SigDecrease
ATAC	tRNA-Asp-GAY	tRNA	tRNA	J1.TSA.vs.J1.DMSO	1326.27	-0.508721	0.162317	-3.13412	0.00172371	0.0132112	TRUE	SigDecrease
ATAC	tRNA-Cys-TGY	tRNA	tRNA	J1.TSA.vs.J1.DMSO	929.512	-0.442451	0.107756	-4.10603	4.02523e-05	0.000807137	TRUE	SigDecrease
ATAC	tRNA-Gln-CAA	tRNA	tRNA	J1.TSA.vs.J1.DMSO	467.274	-0.415692	0.17746	-2.34245	0.0191577	0.0709227	FALSE	NoSigChange
ATAC	tRNA-Gln-CAA_	tRNA	tRNA	J1.TSA.vs.J1.DMSO	6.9757	0.240617	0.622369	0.386615	0.699041	0.769843	FALSE	NoSigChange
ATAC	tRNA-Gln-CAG	tRNA	tRNA	J1.TSA.vs.J1.DMSO	689	-0.519131	0.164919	-3.14779	0.0016451	0.0128936	TRUE	SigDecrease
ATAC	tRNA-Glu-GAA	tRNA	tRNA	J1.TSA.vs.J1.DMSO	142.696	-0.626445	0.186507	-3.35883	0.000782744	0.00736924	TRUE	SigDecrease
ATAC	tRNA-Glu-GAG	tRNA	tRNA	J1.TSA.vs.J1.DMSO	21.5824	0.369119	0.29887	1.23505	0.216813	0.327874	FALSE	NoSigChange
ATAC	tRNA-Glu-GAG_	tRNA	tRNA	J1.TSA.vs.J1.DMSO	1669.58	-0.581478	0.163076	-3.56568	0.000362911	0.00424496	TRUE	SigDecrease
ATAC	tRNA-Gly-GGA	tRNA	tRNA	J1.TSA.vs.J1.DMSO	1124.37	-0.503186	0.127466	-3.94761	7.8936e-05	0.00129657	TRUE	SigDecrease
ATAC	tRNA-Gly-GGG	tRNA	tRNA	J1.TSA.vs.J1.DMSO	169.485	-0.416936	0.154482	-2.69892	0.00695639	0.0350924	TRUE	SigDecrease
ATAC	tRNA-Gly-GGY	tRNA	tRNA	J1.TSA.vs.J1.DMSO	913.569	-0.580202	0.139925	-4.14653	3.37554e-05	0.000694912	TRUE	SigDecrease
ATAC	tRNA-His-CAY_	tRNA	tRNA	J1.TSA.vs.J1.DMSO	881.419	-0.587655	0.174728	-3.36326	0.000770291	0.00732419	TRUE	SigDecrease
ATAC	tRNA-Ile-ATA	tRNA	tRNA	J1.TSA.vs.J1.DMSO	522.965	-0.476277	0.162893	-2.92387	0.00345714	0.0219352	TRUE	SigDecrease
ATAC	tRNA-Ile-ATT	tRNA	tRNA	J1.TSA.vs.J1.DMSO	973.843	-0.536794	0.13285	-4.0406	5.33137e-05	0.000968428	TRUE	SigDecrease
ATAC	tRNA-Leu-CTA	tRNA	tRNA	J1.TSA.vs.J1.DMSO	118.019	-0.301627	0.154244	-1.95552	0.0505213	0.127667	FALSE	NoSigChange
ATAC	tRNA-Leu-CTA_	tRNA	tRNA	J1.TSA.vs.J1.DMSO	193.491	-0.490533	0.167817	-2.92303	0.00346644	0.0219352	TRUE	SigDecrease
ATAC	tRNA-Leu-CTG	tRNA	tRNA	J1.TSA.vs.J1.DMSO	657.733	-0.458428	0.141886	-3.23095	0.0012338	0.0106424	TRUE	SigDecrease
ATAC	tRNA-Leu-CTY	tRNA	tRNA	J1.TSA.vs.J1.DMSO	773.406	-0.416293	0.139321	-2.988	0.00280805	0.018769	TRUE	SigDecrease
ATAC	tRNA-Leu-TTA	tRNA	tRNA	J1.TSA.vs.J1.DMSO	341.642	-0.305271	0.141117	-2.16325	0.0305222	0.0950125	FALSE	NoSigChange
ATAC	tRNA-Leu-TTAm	tRNA	tRNA	J1.TSA.vs.J1.DMSO	2.43855	0.433059	0.80995	0.534674	0.592875	0.686721	FALSE	NoSigChange
ATAC	tRNA-Leu-TTG	tRNA	tRNA	J1.TSA.vs.J1.DMSO	718.582	-0.477639	0.143823	-3.32101	0.000896914	0.00829243	TRUE	SigDecrease
ATAC	tRNA-Lys-AAA	tRNA	tRNA	J1.TSA.vs.J1.DMSO	710.885	-0.50975	0.148459	-3.4336	0.000595615	0.00617201	TRUE	SigDecrease
ATAC	tRNA-Lys-AAG	tRNA	tRNA	J1.TSA.vs.J1.DMSO	1571.79	-0.186963	0.089618	-2.08622	0.036959	0.107022	FALSE	NoSigChange
ATAC	tRNA-Met	tRNA	tRNA	J1.TSA.vs.J1.DMSO	210.623	-0.247944	0.122715	-2.02048	0.0433338	0.117193	FALSE	NoSigChange
ATAC	tRNA-Met-i	tRNA	tRNA	J1.TSA.vs.J1.DMSO	747.294	-0.340213	0.162236	-2.09703	0.0359912	0.105841	FALSE	NoSigChange
ATAC	tRNA-Met_	tRNA	tRNA	J1.TSA.vs.J1.DMSO	589.388	-0.374624	0.132573	-2.82579	0.00471643	0.0265995	TRUE	SigDecrease
ATAC	tRNA-Phe-TTY	tRNA	tRNA	J1.TSA.vs.J1.DMSO	752.484	-0.361546	0.133205	-2.71421	0.00664338	0.0341913	TRUE	SigDecrease
ATAC	tRNA-Pro-CCA	tRNA	tRNA	J1.TSA.vs.J1.DMSO	721.321	-0.407045	0.141327	-2.88016	0.00397475	0.0237868	TRUE	SigDecrease
ATAC	tRNA-Pro-CCG	tRNA	tRNA	J1.TSA.vs.J1.DMSO	397.534	-0.60885	0.172064	-3.53852	0.00040238	0.00453195	TRUE	SigDecrease
ATAC	tRNA-Pro-CCY	tRNA	tRNA	J1.TSA.vs.J1.DMSO	624.888	-0.421127	0.134332	-3.13497	0.00171871	0.0132112	TRUE	SigDecrease
ATAC	tRNA-SeCe-TGA	tRNA	tRNA	J1.TSA.vs.J1.DMSO	102.313	-0.356941	0.171145	-2.08561	0.0370142	0.107022	FALSE	NoSigChange
ATAC	tRNA-Ser-AGY	tRNA	tRNA	J1.TSA.vs.J1.DMSO	668.46	-0.435276	0.162446	-2.67951	0.00737297	0.0366041	TRUE	SigDecrease
ATAC	tRNA-Ser-TCA_	tRNA	tRNA	J1.TSA.vs.J1.DMSO	207.937	-0.52295	0.179167	-2.91879	0.00351394	0.0219568	TRUE	SigDecrease
ATAC	tRNA-Ser-TCAm	tRNA	tRNA	J1.TSA.vs.J1.DMSO	8447.68	0.167996	0.169592	0.990586	0.321888	0.439818	FALSE	NoSigChange
ATAC	tRNA-Ser-TCG	tRNA	tRNA	J1.TSA.vs.J1.DMSO	275.617	-0.660476	0.172216	-3.83515	0.000125486	0.00188644	TRUE	SigDecrease
ATAC	tRNA-Ser-TCY	tRNA	tRNA	J1.TSA.vs.J1.DMSO	841.879	-0.466227	0.163581	-2.85014	0.00437005	0.025271	TRUE	SigDecrease
ATAC	tRNA-Thr-ACA	tRNA	tRNA	J1.TSA.vs.J1.DMSO	440.719	-0.40899	0.136506	-2.99613	0.00273426	0.0184354	TRUE	SigDecrease
ATAC	tRNA-Thr-ACG	tRNA	tRNA	J1.TSA.vs.J1.DMSO	252.247	-0.54	0.169258	-3.1904	0.00142076	0.0117939	TRUE	SigDecrease
ATAC	tRNA-Thr-ACG_	tRNA	tRNA	J1.TSA.vs.J1.DMSO	205.982	-0.342547	0.150824	-2.27117	0.0231366	0.0813592	FALSE	NoSigChange
ATAC	tRNA-Thr-ACY	tRNA	tRNA	J1.TSA.vs.J1.DMSO	536.22	-0.562151	0.176801	-3.17957	0.00147494	0.0121133	TRUE	SigDecrease
ATAC	tRNA-Thr-ACY_	tRNA	tRNA	J1.TSA.vs.J1.DMSO	394.577	-0.469599	0.151725	-3.09508	0.00196763	0.014536	TRUE	SigDecrease
ATAC	tRNA-Trp-TGG	tRNA	tRNA	J1.TSA.vs.J1.DMSO	667.27	-0.488608	0.154186	-3.16895	0.00152993	0.0123273	TRUE	SigDecrease
ATAC	tRNA-Tyr-TAC	tRNA	tRNA	J1.TSA.vs.J1.DMSO	1102.4	-0.475349	0.143441	-3.3139	0.000920033	0.00845554	TRUE	SigDecrease
ATAC	tRNA-Tyr-TAT	tRNA	tRNA	J1.TSA.vs.J1.DMSO	33.2626	0.236574	0.254671	0.928938	0.352921	0.467734	FALSE	NoSigChange
ATAC	tRNA-Val-GTA	tRNA	tRNA	J1.TSA.vs.J1.DMSO	407.253	-0.381028	0.12795	-2.97794	0.0029019	0.0192297	TRUE	SigDecrease
ATAC	tRNA-Val-GTG	tRNA	tRNA	J1.TSA.vs.J1.DMSO	855.462	-0.471157	0.164691	-2.86085	0.00422503	0.024889	TRUE	SigDecrease
ATAC	tRNA-Val-GTY	tRNA	tRNA	J1.TSA.vs.J1.DMSO	827.786	-0.499537	0.14314	-3.48986	0.00048327	0.005146	TRUE	SigDecrease
ATAC	TTAAAn	Simple_repeat	Simple_repeat	J1.TSA.vs.J1.DMSO	213.151	0.727863	0.372768	1.95259	0.0508681	0.128111	FALSE	NoSigChange
ATAC	TTAAGn	Simple_repeat	Simple_repeat	J1.TSA.vs.J1.DMSO	23.6612	0.237648	0.290685	0.817545	0.413617	0.525617	FALSE	NoSigChange
ATAC	TTAAn	Simple_repeat	Simple_repeat	J1.TSA.vs.J1.DMSO	3695.03	0.583319	0.308702	1.88959	0.0588133	0.139712	FALSE	NoSigChange
ATAC	TTACGn	Simple_repeat	Simple_repeat	J1.TSA.vs.J1.DMSO	18.5127	0.166285	0.382309	0.43495	0.663599	0.744079	FALSE	NoSigChange
ATAC	TTAGGCn	Simple_repeat	Simple_repeat	J1.TSA.vs.J1.DMSO	184.959	0.253967	0.126194	2.01252	0.0441652	0.118182	FALSE	NoSigChange
ATAC	TTAGGGn	Simple_repeat	Simple_repeat	J1.TSA.vs.J1.DMSO	82283.3	0.37879	0.0908166	4.17094	3.03346e-05	0.000650509	TRUE	SigIncrease
ATAC	TTAGGn	Simple_repeat	Simple_repeat	J1.TSA.vs.J1.DMSO	106.085	0.271329	0.13068	2.07629	0.0378673	0.107476	FALSE	NoSigChange
ATAC	TTAGn	Simple_repeat	Simple_repeat	J1.TSA.vs.J1.DMSO	1103.92	0.173344	0.0866999	1.99936	0.0455697	0.120068	FALSE	NoSigChange
ATAC	TTAn	Simple_repeat	Simple_repeat	J1.TSA.vs.J1.DMSO	7668.89	0.78957	0.369621	2.13616	0.0326663	0.0999407	FALSE	NoSigChange
ATAC	TTATAn	Simple_repeat	Simple_repeat	J1.TSA.vs.J1.DMSO	1697.58	1.11712	0.498111	2.24272	0.0249151	0.0847334	FALSE	NoSigChange
ATAC	TTATGn	Simple_repeat	Simple_repeat	J1.TSA.vs.J1.DMSO	214.648	0.366831	0.168809	2.17305	0.0297763	0.0934444	FALSE	NoSigChange
ATAC	TTCAn	Simple_repeat	Simple_repeat	J1.TSA.vs.J1.DMSO	7177.83	0.0900514	0.0709691	1.26888	0.204483	0.31762	FALSE	NoSigChange
ATAC	TTCCCn	Simple_repeat	Simple_repeat	J1.TSA.vs.J1.DMSO	3658.87	0.0724942	0.0419296	1.72895	0.0838179	0.174179	FALSE	NoSigChange
ATAC	TTCCn	Simple_repeat	Simple_repeat	J1.TSA.vs.J1.DMSO	20111.9	0.138713	0.0925893	1.49815	0.134094	0.238526	FALSE	NoSigChange
ATAC	TTCGGGn	Simple_repeat	Simple_repeat	J1.TSA.vs.J1.DMSO	221.125	-0.44493	0.20995	-2.11922	0.0340717	0.102149	FALSE	NoSigChange
ATAC	TTCGGn	Simple_repeat	Simple_repeat	J1.TSA.vs.J1.DMSO	12.3839	-0.17795	0.396955	-0.448288	0.653946	0.736836	FALSE	NoSigChange
ATAC	TTCGn	Simple_repeat	Simple_repeat	J1.TSA.vs.J1.DMSO	167.699	-0.161075	0.127892	-1.25947	0.207861	0.320617	FALSE	NoSigChange
ATAC	TTCn	Simple_repeat	Simple_repeat	J1.TSA.vs.J1.DMSO	12613.8	0.227916	0.13108	1.73876	0.0820771	0.171993	FALSE	NoSigChange
ATAC	TTCTCCn	Simple_repeat	Simple_repeat	J1.TSA.vs.J1.DMSO	2840.75	0.192994	0.110635	1.74441	0.081087	0.17127	FALSE	NoSigChange
ATAC	TTCTCn	Simple_repeat	Simple_repeat	J1.TSA.vs.J1.DMSO	5187.16	0.177367	0.0886115	2.00162	0.0453255	0.119628	FALSE	NoSigChange
ATAC	TTCTGn	Simple_repeat	Simple_repeat	J1.TSA.vs.J1.DMSO	520.747	0.219501	0.070952	3.09366	0.00197704	0.014536	TRUE	SigIncrease
ATAC	TTGGGGn	Simple_repeat	Simple_repeat	J1.TSA.vs.J1.DMSO	857.862	-0.0321984	0.111042	-0.289967	0.771842	0.825865	FALSE	NoSigChange
ATAC	TTGGn	Simple_repeat	Simple_repeat	J1.TSA.vs.J1.DMSO	7090.76	0.147508	0.0624661	2.36141	0.0182054	0.0690643	FALSE	NoSigChange
ATAC	TTGn	Simple_repeat	Simple_repeat	J1.TSA.vs.J1.DMSO	19914.1	0.210008	0.0899717	2.33416	0.0195875	0.0714967	FALSE	NoSigChange
ATAC	TTGTGn	Simple_repeat	Simple_repeat	J1.TSA.vs.J1.DMSO	724.366	0.137958	0.0668696	2.06308	0.0391046	0.109182	FALSE	NoSigChange
ATAC	TTTAAn	Simple_repeat	Simple_repeat	J1.TSA.vs.J1.DMSO	261.307	0.84983	0.418095	2.03262	0.0420906	0.115023	FALSE	NoSigChange
ATAC	TTTAGn	Simple_repeat	Simple_repeat	J1.TSA.vs.J1.DMSO	191.696	0.296825	0.160434	1.85014	0.0642934	0.146332	FALSE	NoSigChange
ATAC	TTTAn	Simple_repeat	Simple_repeat	J1.TSA.vs.J1.DMSO	17051.1	0.727571	0.348641	2.08688	0.0368994	0.107022	FALSE	NoSigChange
ATAC	TTTCCn	Simple_repeat	Simple_repeat	J1.TSA.vs.J1.DMSO	3291.68	0.110359	0.10161	1.0861	0.277435	0.394438	FALSE	NoSigChange
ATAC	TTTCGn	Simple_repeat	Simple_repeat	J1.TSA.vs.J1.DMSO	47.5989	0.274944	0.21999	1.2498	0.211371	0.323767	FALSE	NoSigChange
ATAC	TTTCn	Simple_repeat	Simple_repeat	J1.TSA.vs.J1.DMSO	23555.4	0.238419	0.140532	1.69655	0.0897821	0.18264	FALSE	NoSigChange
ATAC	TTTGn	Simple_repeat	Simple_repeat	J1.TSA.vs.J1.DMSO	50571.4	0.228785	0.0861632	2.65525	0.00792489	0.0388445	TRUE	SigIncrease
ATAC	TTTTAn	Simple_repeat	Simple_repeat	J1.TSA.vs.J1.DMSO	3915.73	0.694129	0.333501	2.08134	0.0374025	0.107148	FALSE	NoSigChange
ATAC	TTTTCn	Simple_repeat	Simple_repeat	J1.TSA.vs.J1.DMSO	5840.74	0.234315	0.126823	1.84758	0.0646636	0.146609	FALSE	NoSigChange
ATAC	TTTTGn	Simple_repeat	Simple_repeat	J1.TSA.vs.J1.DMSO	38396.3	0.150842	0.0765258	1.97113	0.0487092	0.124928	FALSE	NoSigChange
ATAC	TTTTTAn	Simple_repeat	Simple_repeat	J1.TSA.vs.J1.DMSO	759.742	0.57675	0.302888	1.90417	0.0568877	0.137242	FALSE	NoSigChange
ATAC	TTTTTGn	Simple_repeat	Simple_repeat	J1.TSA.vs.J1.DMSO	10718.5	0.175524	0.0944661	1.85806	0.0631601	0.145588	FALSE	NoSigChange
ATAC	U1	snRNA	snRNA	J1.TSA.vs.J1.DMSO	7087.24	-0.356074	0.142244	-2.50325	0.0123058	0.0521981	FALSE	NoSigChange
ATAC	U13	snRNA	snRNA	J1.TSA.vs.J1.DMSO	328.658	-0.371897	0.133978	-2.7758	0.00550657	0.0301495	TRUE	SigDecrease
ATAC	U13_	snRNA	snRNA	J1.TSA.vs.J1.DMSO	78.6744	-0.234089	0.178256	-1.31322	0.18911	0.302576	FALSE	NoSigChange
ATAC	U14	snRNA	snRNA	J1.TSA.vs.J1.DMSO	113.169	-0.723744	0.263891	-2.74259	0.00609573	0.0322322	TRUE	SigDecrease
ATAC	U17	snRNA	snRNA	J1.TSA.vs.J1.DMSO	211.341	-0.408028	0.148394	-2.74963	0.0059663	0.0320975	TRUE	SigDecrease
ATAC	U2	snRNA	snRNA	J1.TSA.vs.J1.DMSO	6355.04	-0.339911	0.0946556	-3.59103	0.000329374	0.00400436	TRUE	SigDecrease
ATAC	U3	snRNA	snRNA	J1.TSA.vs.J1.DMSO	2860.82	-0.416017	0.166157	-2.50376	0.0122883	0.0521981	FALSE	NoSigChange
ATAC	U4	snRNA	snRNA	J1.TSA.vs.J1.DMSO	841.437	-0.282657	0.10973	-2.57593	0.00999698	0.0450942	TRUE	SigDecrease
ATAC	U5	snRNA	snRNA	J1.TSA.vs.J1.DMSO	1600.13	-0.370395	0.132157	-2.80269	0.00506778	0.0282725	TRUE	SigDecrease
ATAC	U6	snRNA	snRNA	J1.TSA.vs.J1.DMSO	4767.8	0.110594	0.0557675	1.98313	0.0473525	0.122878	FALSE	NoSigChange
ATAC	U7	snRNA	snRNA	J1.TSA.vs.J1.DMSO	269.067	-0.295766	0.109628	-2.69791	0.00697757	0.0350924	TRUE	SigDecrease
ATAC	U8	snRNA	snRNA	J1.TSA.vs.J1.DMSO	313.959	-0.578847	0.217649	-2.65955	0.00782462	0.0387218	TRUE	SigDecrease
ATAC	UCON1	Unknown	Unknown	J1.TSA.vs.J1.DMSO	73.7682	0.0873163	0.173939	0.501993	0.615673	0.70729	FALSE	NoSigChange
ATAC	UCON10	Unknown	Unknown	J1.TSA.vs.J1.DMSO	336.556	0.308322	0.0989627	3.11554	0.00183611	0.0138968	TRUE	SigIncrease
ATAC	UCON11	Unknown	Unknown	J1.TSA.vs.J1.DMSO	266.043	0.00373896	0.0900642	0.0415144	0.966886	0.971922	FALSE	NoSigChange
ATAC	UCON12	Unknown	Unknown	J1.TSA.vs.J1.DMSO	111.622	0.31983	0.121499	2.63238	0.00847895	0.0406613	TRUE	SigIncrease
ATAC	UCON12A	Unknown	Unknown	J1.TSA.vs.J1.DMSO	123.358	0.331195	0.123389	2.68415	0.00727145	0.0362165	TRUE	SigIncrease
ATAC	UCON13	LINE?	Penelope?	J1.TSA.vs.J1.DMSO	273.464	-0.17599	0.139059	-1.26558	0.205663	0.317862	FALSE	NoSigChange
ATAC	UCON14	DNA?	DNA?	J1.TSA.vs.J1.DMSO	237.732	0.0507657	0.112014	0.453209	0.650398	0.73515	FALSE	NoSigChange
ATAC	UCON15	Unknown	Unknown	J1.TSA.vs.J1.DMSO	178.511	0.056402	0.133254	0.423265	0.672102	0.752391	FALSE	NoSigChange
ATAC	UCON16	Unknown	Unknown	J1.TSA.vs.J1.DMSO	108.288	0.118807	0.138485	0.857902	0.390947	0.504114	FALSE	NoSigChange
ATAC	UCON17	Unknown	Unknown	J1.TSA.vs.J1.DMSO	126.047	0.266767	0.151578	1.75993	0.0784197	0.168078	FALSE	NoSigChange
ATAC	UCON18	Unknown	Unknown	J1.TSA.vs.J1.DMSO	78.41	0.103053	0.175916	0.585808	0.558005	0.660198	FALSE	NoSigChange
ATAC	UCON19	Unknown	Unknown	J1.TSA.vs.J1.DMSO	100.233	0.487139	0.156568	3.11137	0.00186223	0.0139577	TRUE	SigIncrease
ATAC	UCON2	Unknown	Unknown	J1.TSA.vs.J1.DMSO	464.128	0.118362	0.13405	0.882963	0.377257	0.491548	FALSE	NoSigChange
ATAC	UCON20	Unknown	Unknown	J1.TSA.vs.J1.DMSO	223.252	-0.025735	0.150665	-0.17081	0.864374	0.8939	FALSE	NoSigChange
ATAC	UCON21	DNA?	DNA?	J1.TSA.vs.J1.DMSO	117.162	0.143794	0.136751	1.05151	0.293026	0.407964	FALSE	NoSigChange
ATAC	UCON22	Unknown	Unknown	J1.TSA.vs.J1.DMSO	148.429	-0.11421	0.106455	-1.07285	0.28334	0.399888	FALSE	NoSigChange
ATAC	UCON23	DNA	hAT?	J1.TSA.vs.J1.DMSO	68.9777	0.0526299	0.151228	0.348017	0.727827	0.79306	FALSE	NoSigChange
ATAC	UCON24	Unknown	Unknown	J1.TSA.vs.J1.DMSO	130.356	0.0404457	0.128896	0.313786	0.753683	0.813767	FALSE	NoSigChange
ATAC	UCON25	Unknown	Unknown	J1.TSA.vs.J1.DMSO	156.899	-0.210451	0.141247	-1.48995	0.136238	0.241228	FALSE	NoSigChange
ATAC	UCON26	Unknown	Unknown	J1.TSA.vs.J1.DMSO	659.969	0.0723316	0.0946077	0.764543	0.444544	0.55622	FALSE	NoSigChange
ATAC	UCON27	Unknown	Unknown	J1.TSA.vs.J1.DMSO	305.973	0.1889	0.15131	1.24843	0.211873	0.323894	FALSE	NoSigChange
ATAC	UCON28a	Unknown	Unknown	J1.TSA.vs.J1.DMSO	531.358	0.0437688	0.0898521	0.487121	0.626173	0.715626	FALSE	NoSigChange
ATAC	UCON28b	Unknown	Unknown	J1.TSA.vs.J1.DMSO	299.597	0.0769763	0.117868	0.653074	0.513709	0.621603	FALSE	NoSigChange
ATAC	UCON28c	Unknown	Unknown	J1.TSA.vs.J1.DMSO	172.709	0.35526	0.16743	2.12184	0.0338513	0.101884	FALSE	NoSigChange
ATAC	UCON29	DNA	PiggyBac?	J1.TSA.vs.J1.DMSO	1032.18	-0.0322575	0.0747791	-0.43137	0.666199	0.746453	FALSE	NoSigChange
ATAC	UCON31	Unknown	Unknown	J1.TSA.vs.J1.DMSO	842.934	-0.0263386	0.0684914	-0.384554	0.700568	0.770425	FALSE	NoSigChange
ATAC	UCON4	Unknown	Unknown	J1.TSA.vs.J1.DMSO	346.134	-0.117602	0.0870218	-1.35141	0.176564	0.288176	FALSE	NoSigChange
ATAC	UCON5	Unknown	Unknown	J1.TSA.vs.J1.DMSO	367.891	-0.0934312	0.0813342	-1.14873	0.250666	0.365812	FALSE	NoSigChange
ATAC	UCON6	Unknown	Unknown	J1.TSA.vs.J1.DMSO	242.049	-0.0583733	0.103392	-0.56458	0.572359	0.670503	FALSE	NoSigChange
ATAC	UCON7	DNA?	DNA?	J1.TSA.vs.J1.DMSO	286.398	0.254295	0.182115	1.39634	0.162611	0.271821	FALSE	NoSigChange
ATAC	UCON8	Unknown	Unknown	J1.TSA.vs.J1.DMSO	374.815	0.0284573	0.0911513	0.312199	0.754889	0.81437	FALSE	NoSigChange
ATAC	UCON9	Unknown	Unknown	J1.TSA.vs.J1.DMSO	124.031	0.263076	0.147538	1.78311	0.0745683	0.162848	FALSE	NoSigChange
ATAC	URR1A	DNA	hAT-Charlie	J1.TSA.vs.J1.DMSO	102633	0.137426	0.0694302	1.97934	0.0477777	0.123773	FALSE	NoSigChange
ATAC	URR1B	DNA	hAT-Charlie	J1.TSA.vs.J1.DMSO	97942.7	0.110507	0.0591498	1.86825	0.0617266	0.14375	FALSE	NoSigChange
ATAC	X1_LINE	LINE	CR1	J1.TSA.vs.J1.DMSO	271.018	-0.106833	0.121632	-0.878333	0.379763	0.494397	FALSE	NoSigChange
ATAC	X2_LINE	LINE	CR1	J1.TSA.vs.J1.DMSO	152.994	0.0281354	0.116489	0.241528	0.809146	0.852439	FALSE	NoSigChange
ATAC	X3_LINE	LINE	RTE-BovB	J1.TSA.vs.J1.DMSO	1538.74	-0.118597	0.0454523	-2.60926	0.00907372	0.0419543	TRUE	SigDecrease
ATAC	X5A_LINE	LINE	CR1	J1.TSA.vs.J1.DMSO	247.073	0.232956	0.137093	1.69926	0.089271	0.18184	FALSE	NoSigChange
ATAC	X5B_LINE	LINE	CR1	J1.TSA.vs.J1.DMSO	285.674	0.157188	0.0836486	1.87914	0.060225	0.141841	FALSE	NoSigChange
ATAC	X6A_LINE	LINE	CR1	J1.TSA.vs.J1.DMSO	681.963	-0.205557	0.0858527	-2.3943	0.016652	0.0649261	FALSE	NoSigChange
ATAC	X6B_LINE	LINE	CR1	J1.TSA.vs.J1.DMSO	1027.28	0.101207	0.0813343	1.24434	0.213375	0.324899	FALSE	NoSigChange
ATAC	X7A_LINE	LINE	CR1	J1.TSA.vs.J1.DMSO	610.218	0.0791701	0.0772765	1.0245	0.305598	0.419789	FALSE	NoSigChange
ATAC	X7B_LINE	LINE	CR1	J1.TSA.vs.J1.DMSO	627.598	0.133092	0.0914958	1.45463	0.145772	0.251477	FALSE	NoSigChange
ATAC	X7C_LINE	LINE	CR1	J1.TSA.vs.J1.DMSO	672.064	-0.100379	0.0639365	-1.56998	0.116419	0.217091	FALSE	NoSigChange
ATAC	X7D_LINE	LINE	CR1	J1.TSA.vs.J1.DMSO	19.8963	0.139742	0.280233	0.498665	0.618015	0.708927	FALSE	NoSigChange
ATAC	X8_LINE	LINE	CR1	J1.TSA.vs.J1.DMSO	516.263	0.187962	0.0896648	2.09628	0.0360574	0.105841	FALSE	NoSigChange
ATAC	X9_LINE	LINE	L1?	J1.TSA.vs.J1.DMSO	170.287	0.105957	0.128113	0.827059	0.408204	0.520451	FALSE	NoSigChange
ATAC	YREP_Mm	Unknown	Unknown	J1.TSA.vs.J1.DMSO	13887.6	0.334411	0.0818266	4.08683	4.3731e-05	0.000833588	TRUE	SigIncrease
ATAC	Zaphod	DNA	hAT-Tip100	J1.TSA.vs.J1.DMSO	4368.28	0.169104	0.0924813	1.82853	0.0674706	0.151432	FALSE	NoSigChange
ATAC	Zaphod2	DNA	hAT-Tip100	J1.TSA.vs.J1.DMSO	854.486	0.259836	0.118809	2.187	0.0287427	0.0916136	FALSE	NoSigChange
ATAC	Zaphod3	DNA	hAT-Tip100	J1.TSA.vs.J1.DMSO	2517.22	0.163529	0.079581	2.05487	0.0398912	0.110977	FALSE	NoSigChange
ATAC	ZP3AR	Satellite	Satellite	J1.TSA.vs.J1.DMSO	40226.7	0.115543	0.127417	0.906807	0.364509	0.477803	FALSE	NoSigChange
ATAC	4.5SRNA	scRNA	scRNA	TKO.DMSO.vs.J1.DMSO	16308	0.204823	0.103947	1.97046	0.0487855	0.288601	FALSE	NoSigChange
ATAC	5S	rRNA	rRNA	TKO.DMSO.vs.J1.DMSO	8878.21	-0.318812	0.0904485	-3.52479	0.000423815	0.00798012	TRUE	SigDecrease
ATAC	7SK	RNA	RNA	TKO.DMSO.vs.J1.DMSO	5260.19	0.0321205	0.03443	0.932921	0.350861	0.744085	FALSE	NoSigChange
ATAC	7SLRNA	srpRNA	srpRNA	TKO.DMSO.vs.J1.DMSO	3261.25	0.0218757	0.0670474	0.326272	0.744219	0.916327	FALSE	NoSigChange
ATAC	A-rich	Low_complexity	Low_complexity	TKO.DMSO.vs.J1.DMSO	50025.8	0.0933021	0.112021	0.832901	0.404901	0.771518	FALSE	NoSigChange
ATAC	AAATGn	Simple_repeat	Simple_repeat	TKO.DMSO.vs.J1.DMSO	168.563	-0.0166464	0.163081	-0.102074	0.918698	0.970889	FALSE	NoSigChange
ATAC	AACTGn	Simple_repeat	Simple_repeat	TKO.DMSO.vs.J1.DMSO	387.439	0.00885338	0.0951256	0.0930703	0.925848	0.97378	FALSE	NoSigChange
ATAC	AAGTGn	Simple_repeat	Simple_repeat	TKO.DMSO.vs.J1.DMSO	55.5441	0.022591	0.207094	0.109086	0.913134	0.969811	FALSE	NoSigChange
ATAC	AATAGn	Simple_repeat	Simple_repeat	TKO.DMSO.vs.J1.DMSO	325.178	0.274732	0.169628	1.61961	0.105315	0.449191	FALSE	NoSigChange
ATAC	AATTGn	Simple_repeat	Simple_repeat	TKO.DMSO.vs.J1.DMSO	69.2853	0.269053	0.176345	1.52573	0.127078	0.495477	FALSE	NoSigChange
ATAC	ACATGn	Simple_repeat	Simple_repeat	TKO.DMSO.vs.J1.DMSO	134.684	0.0289422	0.150707	0.192042	0.847709	0.949089	FALSE	NoSigChange
ATAC	ACCGn	Simple_repeat	Simple_repeat	TKO.DMSO.vs.J1.DMSO	86.7203	0.170782	0.139981	1.22004	0.222451	0.630209	FALSE	NoSigChange
ATAC	ACCTGn	Simple_repeat	Simple_repeat	TKO.DMSO.vs.J1.DMSO	170.987	0.24998	0.152167	1.6428	0.100425	0.433119	FALSE	NoSigChange
ATAC	ACGTGn	Simple_repeat	Simple_repeat	TKO.DMSO.vs.J1.DMSO	33.1947	1.30634	0.267586	4.88196	1.05036e-06	3.75131e-05	TRUE	SigIncrease
ATAC	ACTAGn	Simple_repeat	Simple_repeat	TKO.DMSO.vs.J1.DMSO	201.667	-0.0368115	0.114498	-0.321504	0.747829	0.917635	FALSE	NoSigChange
ATAC	ACTCGn	Simple_repeat	Simple_repeat	TKO.DMSO.vs.J1.DMSO	12.8575	0.0364529	0.401201	0.0908595	0.927604	0.97396	FALSE	NoSigChange
ATAC	ACTGn	Simple_repeat	Simple_repeat	TKO.DMSO.vs.J1.DMSO	1035.93	0.0399143	0.0566601	0.704451	0.481152	0.804383	FALSE	NoSigChange
ATAC	ACTTGn	Simple_repeat	Simple_repeat	TKO.DMSO.vs.J1.DMSO	12.5114	0.358291	0.386431	0.927179	0.353834	0.74607	FALSE	NoSigChange
ATAC	AGATGn	Simple_repeat	Simple_repeat	TKO.DMSO.vs.J1.DMSO	104.917	-0.0489419	0.132025	-0.370703	0.710859	0.900982	FALSE	NoSigChange
ATAC	AGCTGn	Simple_repeat	Simple_repeat	TKO.DMSO.vs.J1.DMSO	718.858	-0.0838986	0.0994191	-0.843888	0.398732	0.76813	FALSE	NoSigChange
ATAC	AGGGGGn	Simple_repeat	Simple_repeat	TKO.DMSO.vs.J1.DMSO	4331.62	-0.0309194	0.0787556	-0.392599	0.694616	0.898468	FALSE	NoSigChange
ATAC	AGGTGn	Simple_repeat	Simple_repeat	TKO.DMSO.vs.J1.DMSO	519.767	-0.049724	0.0752737	-0.660576	0.508884	0.824116	FALSE	NoSigChange
ATAC	AGTAGn	Simple_repeat	Simple_repeat	TKO.DMSO.vs.J1.DMSO	194.24	0.275053	0.105076	2.61766	0.0088535	0.0876269	FALSE	NoSigChange
ATAC	AGTTGn	Simple_repeat	Simple_repeat	TKO.DMSO.vs.J1.DMSO	53.8709	0.0211113	0.195992	0.107715	0.914222	0.969811	FALSE	NoSigChange
ATAC	AmnSINE1	SINE	Deu	TKO.DMSO.vs.J1.DMSO	7421.54	-0.0271468	0.0283427	-0.957806	0.338161	0.732737	FALSE	NoSigChange
ATAC	AmnSINE2	SINE	Deu	TKO.DMSO.vs.J1.DMSO	2034.08	-0.00631732	0.05391	-0.117183	0.906715	0.968836	FALSE	NoSigChange
ATAC	An	Simple_repeat	Simple_repeat	TKO.DMSO.vs.J1.DMSO	30474.6	0.159168	0.106957	1.48815	0.136712	0.512003	FALSE	NoSigChange
ATAC	Arthur1	DNA	hAT-Tip100	TKO.DMSO.vs.J1.DMSO	5653.96	0.0519469	0.0999593	0.51968	0.603287	0.868913	FALSE	NoSigChange
ATAC	Arthur1A	DNA	hAT-Tip100	TKO.DMSO.vs.J1.DMSO	790.013	0.0937279	0.079949	1.17235	0.241058	0.655097	FALSE	NoSigChange
ATAC	Arthur1B	DNA	hAT-Tip100	TKO.DMSO.vs.J1.DMSO	3556.29	0.0766615	0.0805385	0.951861	0.341167	0.734397	FALSE	NoSigChange
ATAC	Arthur1C	DNA	hAT-Tip100	TKO.DMSO.vs.J1.DMSO	887.755	-0.0400863	0.0633565	-0.632711	0.526923	0.833095	FALSE	NoSigChange
ATAC	AT_rich	Low_complexity	Low_complexity	TKO.DMSO.vs.J1.DMSO	210943	0.451436	0.310397	1.45438	0.145841	0.527349	FALSE	NoSigChange
ATAC	ATAAGn	Simple_repeat	Simple_repeat	TKO.DMSO.vs.J1.DMSO	96.4874	0.451795	0.222174	2.03352	0.0420001	0.254307	FALSE	NoSigChange
ATAC	ATAGGn	Simple_repeat	Simple_repeat	TKO.DMSO.vs.J1.DMSO	181.684	0.107566	0.129516	0.830518	0.406246	0.771518	FALSE	NoSigChange
ATAC	ATATGn	Simple_repeat	Simple_repeat	TKO.DMSO.vs.J1.DMSO	449.335	0.143779	0.197361	0.728507	0.466304	0.795204	FALSE	NoSigChange
ATAC	ATCTGn	Simple_repeat	Simple_repeat	TKO.DMSO.vs.J1.DMSO	41.2889	0.297192	0.233239	1.2742	0.202594	0.610254	FALSE	NoSigChange
ATAC	ATGGTGn	Simple_repeat	Simple_repeat	TKO.DMSO.vs.J1.DMSO	3657.76	-0.0403588	0.0801679	-0.503428	0.614663	0.873398	FALSE	NoSigChange
ATAC	ATGn	Simple_repeat	Simple_repeat	TKO.DMSO.vs.J1.DMSO	6152.63	0.000213259	0.100171	0.00212895	0.998301	0.999479	FALSE	NoSigChange
ATAC	ATGTGn	Simple_repeat	Simple_repeat	TKO.DMSO.vs.J1.DMSO	509.052	0.0581169	0.0924321	0.628753	0.529511	0.83326	FALSE	NoSigChange
ATAC	ATTAGn	Simple_repeat	Simple_repeat	TKO.DMSO.vs.J1.DMSO	118.252	0.00831637	0.191508	0.0434256	0.965362	0.988909	FALSE	NoSigChange
ATAC	ATTGn	Simple_repeat	Simple_repeat	TKO.DMSO.vs.J1.DMSO	3532.83	0.121087	0.0784049	1.54438	0.122495	0.488083	FALSE	NoSigChange
ATAC	ATTTGn	Simple_repeat	Simple_repeat	TKO.DMSO.vs.J1.DMSO	349.209	-0.0679817	0.0867589	-0.783571	0.433292	0.781382	FALSE	NoSigChange
ATAC	B1_Mm	SINE	Alu	TKO.DMSO.vs.J1.DMSO	236808	0.181669	0.0508035	3.57592	0.000348999	0.00708472	TRUE	SigIncrease
ATAC	B1_Mur1	SINE	Alu	TKO.DMSO.vs.J1.DMSO	210828	0.0993467	0.0546076	1.81928	0.0688682	0.35213	FALSE	NoSigChange
ATAC	B1_Mur2	SINE	Alu	TKO.DMSO.vs.J1.DMSO	175434	0.101763	0.0560536	1.81545	0.0694544	0.352755	FALSE	NoSigChange
ATAC	B1_Mur3	SINE	Alu	TKO.DMSO.vs.J1.DMSO	138886	0.112899	0.0567534	1.98929	0.0466687	0.279288	FALSE	NoSigChange
ATAC	B1_Mur4	SINE	Alu	TKO.DMSO.vs.J1.DMSO	225124	0.128729	0.0573025	2.24649	0.0246728	0.183148	FALSE	NoSigChange
ATAC	B1_Mus1	SINE	Alu	TKO.DMSO.vs.J1.DMSO	542957	0.137633	0.051683	2.66303	0.00774415	0.0783447	FALSE	NoSigChange
ATAC	B1_Mus2	SINE	Alu	TKO.DMSO.vs.J1.DMSO	424417	0.172952	0.0581589	2.97378	0.00294151	0.0344068	TRUE	SigIncrease
ATAC	B1F	SINE	Alu	TKO.DMSO.vs.J1.DMSO	231834	0.0681423	0.0449564	1.51574	0.129585	0.501452	FALSE	NoSigChange
ATAC	B1F1	SINE	Alu	TKO.DMSO.vs.J1.DMSO	103832	0.074754	0.0465436	1.60611	0.10825	0.457912	FALSE	NoSigChange
ATAC	B1F2	SINE	Alu	TKO.DMSO.vs.J1.DMSO	88908.4	0.0793781	0.0499712	1.58848	0.112178	0.465342	FALSE	NoSigChange
ATAC	B2_Mm1a	SINE	B2	TKO.DMSO.vs.J1.DMSO	134394	0.337011	0.103601	3.25296	0.00114209	0.0172881	TRUE	SigIncrease
ATAC	B2_Mm1t	SINE	B2	TKO.DMSO.vs.J1.DMSO	164530	0.278858	0.088218	3.16101	0.00157222	0.0220682	TRUE	SigIncrease
ATAC	B2_Mm2	SINE	B2	TKO.DMSO.vs.J1.DMSO	605033	0.170502	0.0736869	2.31387	0.0206748	0.161222	FALSE	NoSigChange
ATAC	B3	SINE	B2	TKO.DMSO.vs.J1.DMSO	1.05296e+06	0.152815	0.0455978	3.35138	0.000804107	0.0130689	TRUE	SigIncrease
ATAC	B3A	SINE	B2	TKO.DMSO.vs.J1.DMSO	618609	0.13419	0.0378708	3.54337	0.000395043	0.00772085	TRUE	SigIncrease
ATAC	B4	SINE	B4	TKO.DMSO.vs.J1.DMSO	418686	0.0492501	0.0464493	1.0603	0.289009	0.698039	FALSE	NoSigChange
ATAC	B4A	SINE	B4	TKO.DMSO.vs.J1.DMSO	740143	0.0642305	0.0457615	1.40359	0.16044	0.552945	FALSE	NoSigChange
ATAC	BC1_Mm	scRNA	scRNA	TKO.DMSO.vs.J1.DMSO	25104.1	0.0915675	0.0493088	1.85702	0.063308	0.338227	FALSE	NoSigChange
ATAC	BGLII	LTR	ERVK	TKO.DMSO.vs.J1.DMSO	42203.7	-0.432088	0.064301	-6.71977	1.82009e-11	1.27737e-09	TRUE	SigDecrease
ATAC	BGLII_A	LTR	ERVK	TKO.DMSO.vs.J1.DMSO	4062.69	-0.187178	0.0610597	-3.06549	0.00217315	0.0284725	TRUE	SigDecrease
ATAC	BGLII_B	LTR	ERVK	TKO.DMSO.vs.J1.DMSO	16308.5	-0.109162	0.0520225	-2.09836	0.0358732	0.23181	FALSE	NoSigChange
ATAC	BGLII_B2	LTR	ERVK	TKO.DMSO.vs.J1.DMSO	3721.94	-0.0921833	0.0375908	-2.45228	0.0141954	0.124532	FALSE	NoSigChange
ATAC	BGLII_C	LTR	ERVK	TKO.DMSO.vs.J1.DMSO	613.855	-0.00961905	0.069523	-0.138358	0.889958	0.962251	FALSE	NoSigChange
ATAC	BGLII_Mur	LTR	ERVK	TKO.DMSO.vs.J1.DMSO	7462.47	-0.0866004	0.0348054	-2.48813	0.0128416	0.114138	FALSE	NoSigChange
ATAC	BGLII_Mus	LTR	ERVK	TKO.DMSO.vs.J1.DMSO	9699.16	-0.397138	0.0640829	-6.19725	5.74571e-10	3.54855e-08	TRUE	SigDecrease
ATAC	BLACKJACK	DNA	hAT-Blackjack	TKO.DMSO.vs.J1.DMSO	4359.03	0.0722819	0.123054	0.587401	0.556934	0.848034	FALSE	NoSigChange
ATAC	C-rich	Low_complexity	Low_complexity	TKO.DMSO.vs.J1.DMSO	166742	-0.0949137	0.124421	-0.762845	0.445556	0.787909	FALSE	NoSigChange
ATAC	C573_MM	Other	Other	TKO.DMSO.vs.J1.DMSO	4467.02	0.121958	0.143822	0.847979	0.39645	0.76813	FALSE	NoSigChange
ATAC	CAAAAAn	Simple_repeat	Simple_repeat	TKO.DMSO.vs.J1.DMSO	10709.9	0.0951939	0.0931701	1.02172	0.306912	0.708577	FALSE	NoSigChange
ATAC	CAAAAn	Simple_repeat	Simple_repeat	TKO.DMSO.vs.J1.DMSO	38297.4	0.127694	0.0768392	1.66184	0.0965451	0.424689	FALSE	NoSigChange
ATAC	CAAACn	Simple_repeat	Simple_repeat	TKO.DMSO.vs.J1.DMSO	6619.11	0.0907715	0.0544628	1.66667	0.09558	0.4224	FALSE	NoSigChange
ATAC	CAAAGn	Simple_repeat	Simple_repeat	TKO.DMSO.vs.J1.DMSO	1146	0.110475	0.0556569	1.98492	0.047153	0.281098	FALSE	NoSigChange
ATAC	CAAAn	Simple_repeat	Simple_repeat	TKO.DMSO.vs.J1.DMSO	50936.2	0.120018	0.0838174	1.4319	0.152174	0.542623	FALSE	NoSigChange
ATAC	CAAATn	Simple_repeat	Simple_repeat	TKO.DMSO.vs.J1.DMSO	333.169	0.10136	0.0996822	1.01683	0.309232	0.709442	FALSE	NoSigChange
ATAC	CAACCn	Simple_repeat	Simple_repeat	TKO.DMSO.vs.J1.DMSO	440.19	0.121772	0.0884483	1.37676	0.168586	0.565864	FALSE	NoSigChange
ATAC	CAACGn	Simple_repeat	Simple_repeat	TKO.DMSO.vs.J1.DMSO	13.2758	0.381663	0.365343	1.04467	0.296176	0.703531	FALSE	NoSigChange
ATAC	CAACTn	Simple_repeat	Simple_repeat	TKO.DMSO.vs.J1.DMSO	116.936	-0.159371	0.124905	-1.27594	0.201978	0.610254	FALSE	NoSigChange
ATAC	CAAGAn	Simple_repeat	Simple_repeat	TKO.DMSO.vs.J1.DMSO	437.398	0.119726	0.0955283	1.2533	0.210095	0.612846	FALSE	NoSigChange
ATAC	CAAGCn	Simple_repeat	Simple_repeat	TKO.DMSO.vs.J1.DMSO	344.724	-0.0765779	0.0872599	-0.877584	0.38017	0.754476	FALSE	NoSigChange
ATAC	CAAGGn	Simple_repeat	Simple_repeat	TKO.DMSO.vs.J1.DMSO	651.973	0.0304305	0.102286	0.297503	0.766082	0.92845	FALSE	NoSigChange
ATAC	CAAGn	Simple_repeat	Simple_repeat	TKO.DMSO.vs.J1.DMSO	3402.36	0.0210506	0.0344543	0.61097	0.541219	0.840686	FALSE	NoSigChange
ATAC	CAAGTn	Simple_repeat	Simple_repeat	TKO.DMSO.vs.J1.DMSO	27.0875	-0.584112	0.290343	-2.0118	0.0442411	0.266807	FALSE	NoSigChange
ATAC	CAAn	Simple_repeat	Simple_repeat	TKO.DMSO.vs.J1.DMSO	19373.8	0.0946922	0.0892711	1.06073	0.288814	0.698039	FALSE	NoSigChange
ATAC	CAATAn	Simple_repeat	Simple_repeat	TKO.DMSO.vs.J1.DMSO	382.532	0.246081	0.147725	1.66581	0.0957514	0.4224	FALSE	NoSigChange
ATAC	CAATCn	Simple_repeat	Simple_repeat	TKO.DMSO.vs.J1.DMSO	94.7698	0.531635	0.160521	3.31194	0.000926499	0.0147476	TRUE	SigIncrease
ATAC	CAATGn	Simple_repeat	Simple_repeat	TKO.DMSO.vs.J1.DMSO	42.9606	0.282193	0.232333	1.2146	0.224517	0.63143	FALSE	NoSigChange
ATAC	CAATn	Simple_repeat	Simple_repeat	TKO.DMSO.vs.J1.DMSO	3421.54	0.135621	0.0687437	1.97285	0.048513	0.288092	FALSE	NoSigChange
ATAC	CAATTn	Simple_repeat	Simple_repeat	TKO.DMSO.vs.J1.DMSO	62.1363	-0.0145435	0.233589	-0.062261	0.950355	0.982819	FALSE	NoSigChange
ATAC	CACAAn	Simple_repeat	Simple_repeat	TKO.DMSO.vs.J1.DMSO	622.397	0.0811428	0.0646926	1.25428	0.209739	0.612846	FALSE	NoSigChange
ATAC	CACACn	Simple_repeat	Simple_repeat	TKO.DMSO.vs.J1.DMSO	2170.97	0.0470191	0.0484093	0.971282	0.331408	0.73112	FALSE	NoSigChange
ATAC	CACAGn	Simple_repeat	Simple_repeat	TKO.DMSO.vs.J1.DMSO	6602.24	0.0353085	0.0672496	0.525036	0.599558	0.868913	FALSE	NoSigChange
ATAC	CACATn	Simple_repeat	Simple_repeat	TKO.DMSO.vs.J1.DMSO	540.938	-0.0561562	0.0734996	-0.764034	0.444847	0.787909	FALSE	NoSigChange
ATAC	CACCATn	Simple_repeat	Simple_repeat	TKO.DMSO.vs.J1.DMSO	3957.02	-0.0354989	0.0773131	-0.459158	0.646121	0.88255	FALSE	NoSigChange
ATAC	CACCCn	Simple_repeat	Simple_repeat	TKO.DMSO.vs.J1.DMSO	6166.36	-0.0869985	0.0986556	-0.88184	0.377863	0.752801	FALSE	NoSigChange
ATAC	CACCGn	Simple_repeat	Simple_repeat	TKO.DMSO.vs.J1.DMSO	151.523	-0.369636	0.195045	-1.89514	0.0580743	0.32488	FALSE	NoSigChange
ATAC	CACCTn	Simple_repeat	Simple_repeat	TKO.DMSO.vs.J1.DMSO	927.394	-0.0384703	0.103596	-0.371351	0.710376	0.900982	FALSE	NoSigChange
ATAC	CACGAn	Simple_repeat	Simple_repeat	TKO.DMSO.vs.J1.DMSO	9.20728	-0.419762	0.430502	-0.975051	0.329535	0.73112	FALSE	NoSigChange
ATAC	CACGCn	Simple_repeat	Simple_repeat	TKO.DMSO.vs.J1.DMSO	156.517	-0.493177	0.194382	-2.53715	0.0111759	0.102104	FALSE	NoSigChange
ATAC	CACGn	Simple_repeat	Simple_repeat	TKO.DMSO.vs.J1.DMSO	6546.75	0.151962	0.104207	1.45828	0.144764	0.525921	FALSE	NoSigChange
ATAC	CACGTn	Simple_repeat	Simple_repeat	TKO.DMSO.vs.J1.DMSO	17.8014	0.164356	0.360215	0.456272	0.648194	0.88255	FALSE	NoSigChange
ATAC	CACTAn	Simple_repeat	Simple_repeat	TKO.DMSO.vs.J1.DMSO	489.6	0.0741428	0.100223	0.739775	0.459437	0.793479	FALSE	NoSigChange
ATAC	CACTCn	Simple_repeat	Simple_repeat	TKO.DMSO.vs.J1.DMSO	468.259	-0.139435	0.0825861	-1.68836	0.0913428	0.413587	FALSE	NoSigChange
ATAC	CACTGn	Simple_repeat	Simple_repeat	TKO.DMSO.vs.J1.DMSO	1079.05	0.0815428	0.0904227	0.901796	0.367165	0.747717	FALSE	NoSigChange
ATAC	CACTTn	Simple_repeat	Simple_repeat	TKO.DMSO.vs.J1.DMSO	14.6725	0.425495	0.454237	0.936723	0.348901	0.743308	FALSE	NoSigChange
ATAC	CAGAAn	Simple_repeat	Simple_repeat	TKO.DMSO.vs.J1.DMSO	958.427	-0.0936615	0.080867	-1.15822	0.246776	0.658104	FALSE	NoSigChange
ATAC	CAGACn	Simple_repeat	Simple_repeat	TKO.DMSO.vs.J1.DMSO	828.303	0.716491	0.116165	6.16787	6.92172e-10	4.11044e-08	TRUE	SigIncrease
ATAC	CAGAGAn	Simple_repeat	Simple_repeat	TKO.DMSO.vs.J1.DMSO	27540.1	0.245147	0.042882	5.71678	1.08562e-08	4.92998e-07	TRUE	SigIncrease
ATAC	CAGAGn	Simple_repeat	Simple_repeat	TKO.DMSO.vs.J1.DMSO	4827.46	0.385332	0.105485	3.65297	0.000259224	0.005587	TRUE	SigIncrease
ATAC	CAGAn	Simple_repeat	Simple_repeat	TKO.DMSO.vs.J1.DMSO	24856.1	0.0807991	0.0568292	1.42179	0.155087	0.547952	FALSE	NoSigChange
ATAC	CAGATn	Simple_repeat	Simple_repeat	TKO.DMSO.vs.J1.DMSO	38.9463	-0.0486378	0.218206	-0.222899	0.823614	0.943644	FALSE	NoSigChange
ATAC	CAGCCn	Simple_repeat	Simple_repeat	TKO.DMSO.vs.J1.DMSO	2581.69	-0.254107	0.109543	-2.31971	0.0203564	0.159545	FALSE	NoSigChange
ATAC	CAGCGn	Simple_repeat	Simple_repeat	TKO.DMSO.vs.J1.DMSO	406.217	-0.00836639	0.214596	-0.0389867	0.968901	0.989797	FALSE	NoSigChange
ATAC	CAGCn	Simple_repeat	Simple_repeat	TKO.DMSO.vs.J1.DMSO	2360.18	0.00151846	0.0849198	0.0178812	0.985734	0.994178	FALSE	NoSigChange
ATAC	CAGCTn	Simple_repeat	Simple_repeat	TKO.DMSO.vs.J1.DMSO	1296.21	-0.30517	0.0839796	-3.63385	0.000279221	0.00590572	TRUE	SigDecrease
ATAC	CAGGAn	Simple_repeat	Simple_repeat	TKO.DMSO.vs.J1.DMSO	729.479	-0.0455414	0.0621532	-0.732728	0.463724	0.795204	FALSE	NoSigChange
ATAC	CAGGCn	Simple_repeat	Simple_repeat	TKO.DMSO.vs.J1.DMSO	692.747	0.221681	0.10887	2.0362	0.0417299	0.253665	FALSE	NoSigChange
ATAC	CAGGGn	Simple_repeat	Simple_repeat	TKO.DMSO.vs.J1.DMSO	1548.72	-0.170265	0.132986	-1.28032	0.200433	0.610034	FALSE	NoSigChange
ATAC	CAGGn	Simple_repeat	Simple_repeat	TKO.DMSO.vs.J1.DMSO	13932.5	0.51617	0.126963	4.06553	4.79238e-05	0.00129815	TRUE	SigIncrease
ATAC	CAGGTn	Simple_repeat	Simple_repeat	TKO.DMSO.vs.J1.DMSO	66.6023	0.0612787	0.181739	0.337179	0.735982	0.912003	FALSE	NoSigChange
ATAC	CAGn	Simple_repeat	Simple_repeat	TKO.DMSO.vs.J1.DMSO	17264.6	-0.00515179	0.108252	-0.0475907	0.962042	0.986972	FALSE	NoSigChange
ATAC	CAGTAn	Simple_repeat	Simple_repeat	TKO.DMSO.vs.J1.DMSO	803.635	0.0701782	0.0832156	0.843329	0.399044	0.76813	FALSE	NoSigChange
ATAC	CAGTCn	Simple_repeat	Simple_repeat	TKO.DMSO.vs.J1.DMSO	162.13	0.0513316	0.116371	0.441102	0.659139	0.88348	FALSE	NoSigChange
ATAC	CAGTGn	Simple_repeat	Simple_repeat	TKO.DMSO.vs.J1.DMSO	1272.51	0.113648	0.0664678	1.70981	0.0873005	0.40403	FALSE	NoSigChange
ATAC	CAGTn	Simple_repeat	Simple_repeat	TKO.DMSO.vs.J1.DMSO	1320.3	0.125447	0.0613973	2.04321	0.0410319	0.251402	FALSE	NoSigChange
ATAC	CAGTTn	Simple_repeat	Simple_repeat	TKO.DMSO.vs.J1.DMSO	388.229	0.00748284	0.0847102	0.0883346	0.929611	0.97396	FALSE	NoSigChange
ATAC	CAn	Simple_repeat	Simple_repeat	TKO.DMSO.vs.J1.DMSO	530447	0.0656086	0.0571705	1.1476	0.251135	0.660932	FALSE	NoSigChange
ATAC	CATAAn	Simple_repeat	Simple_repeat	TKO.DMSO.vs.J1.DMSO	242.33	0.0352355	0.145702	0.241832	0.80891	0.938188	FALSE	NoSigChange
ATAC	CATACn	Simple_repeat	Simple_repeat	TKO.DMSO.vs.J1.DMSO	393.899	0.0351579	0.0792188	0.443808	0.657181	0.88348	FALSE	NoSigChange
ATAC	CATAGn	Simple_repeat	Simple_repeat	TKO.DMSO.vs.J1.DMSO	267.521	-0.0335254	0.111307	-0.301196	0.763265	0.92793	FALSE	NoSigChange
ATAC	CATAn	Simple_repeat	Simple_repeat	TKO.DMSO.vs.J1.DMSO	28494.9	0.0956675	0.119155	0.80288	0.422044	0.775758	FALSE	NoSigChange
ATAC	CATATAn	Simple_repeat	Simple_repeat	TKO.DMSO.vs.J1.DMSO	11759.1	0.194864	0.176926	1.10139	0.270729	0.675163	FALSE	NoSigChange
ATAC	CATATn	Simple_repeat	Simple_repeat	TKO.DMSO.vs.J1.DMSO	497.562	0.213346	0.199055	1.0718	0.283811	0.691174	FALSE	NoSigChange
ATAC	CATCCn	Simple_repeat	Simple_repeat	TKO.DMSO.vs.J1.DMSO	574.741	0.110989	0.0695636	1.59551	0.110599	0.46321	FALSE	NoSigChange
ATAC	CATCGn	Simple_repeat	Simple_repeat	TKO.DMSO.vs.J1.DMSO	42.1722	-0.0963311	0.236404	-0.407485	0.683652	0.896543	FALSE	NoSigChange
ATAC	CATCTn	Simple_repeat	Simple_repeat	TKO.DMSO.vs.J1.DMSO	121.752	-0.00704222	0.128726	-0.0547071	0.956372	0.98574	FALSE	NoSigChange
ATAC	CATGCn	Simple_repeat	Simple_repeat	TKO.DMSO.vs.J1.DMSO	202.94	-0.061833	0.120931	-0.511307	0.609136	0.873307	FALSE	NoSigChange
ATAC	CATGn	Simple_repeat	Simple_repeat	TKO.DMSO.vs.J1.DMSO	3998.74	0.0503469	0.069973	0.719519	0.471821	0.795297	FALSE	NoSigChange
ATAC	CATGTn	Simple_repeat	Simple_repeat	TKO.DMSO.vs.J1.DMSO	191.649	-0.0417642	0.11055	-0.377786	0.70559	0.900101	FALSE	NoSigChange
ATAC	CATn	Simple_repeat	Simple_repeat	TKO.DMSO.vs.J1.DMSO	6080.03	0.0365178	0.0911362	0.400695	0.688645	0.897272	FALSE	NoSigChange
ATAC	CATTAn	Simple_repeat	Simple_repeat	TKO.DMSO.vs.J1.DMSO	78.8701	0.398068	0.179368	2.21928	0.0264677	0.188607	FALSE	NoSigChange
ATAC	CATTCn	Satellite	Satellite	TKO.DMSO.vs.J1.DMSO	223.957	-0.125889	0.0892198	-1.411	0.158245	0.552785	FALSE	NoSigChange
ATAC	CATTGn	Simple_repeat	Simple_repeat	TKO.DMSO.vs.J1.DMSO	83.3556	0.177802	0.180191	0.986743	0.323769	0.723458	FALSE	NoSigChange
ATAC	CATTTn	Simple_repeat	Simple_repeat	TKO.DMSO.vs.J1.DMSO	187.268	0.147024	0.158866	0.925462	0.354726	0.74607	FALSE	NoSigChange
ATAC	CCAAn	Simple_repeat	Simple_repeat	TKO.DMSO.vs.J1.DMSO	6768.48	0.11932	0.0645823	1.84756	0.0646654	0.342731	FALSE	NoSigChange
ATAC	CCAn	Simple_repeat	Simple_repeat	TKO.DMSO.vs.J1.DMSO	16972.7	-0.153419	0.0437845	-3.50396	0.000458393	0.00827631	TRUE	SigDecrease
ATAC	CCCAn	Simple_repeat	Simple_repeat	TKO.DMSO.vs.J1.DMSO	4337.1	-0.0390619	0.0539971	-0.723408	0.469429	0.795297	FALSE	NoSigChange
ATAC	CCCCAAn	Simple_repeat	Simple_repeat	TKO.DMSO.vs.J1.DMSO	660.33	-0.161472	0.117817	-1.37053	0.170523	0.568281	FALSE	NoSigChange
ATAC	CCCCAGn	Simple_repeat	Simple_repeat	TKO.DMSO.vs.J1.DMSO	8345.95	-0.0773435	0.153678	-0.503283	0.614765	0.873398	FALSE	NoSigChange
ATAC	CCCCCAn	Simple_repeat	Simple_repeat	TKO.DMSO.vs.J1.DMSO	9661.88	-0.0837349	0.104067	-0.804626	0.421036	0.774826	FALSE	NoSigChange
ATAC	CCCCCGn	Simple_repeat	Simple_repeat	TKO.DMSO.vs.J1.DMSO	2971.25	-0.0106542	0.1846	-0.0577148	0.953976	0.983927	FALSE	NoSigChange
ATAC	CCCCCTn	Simple_repeat	Simple_repeat	TKO.DMSO.vs.J1.DMSO	4595.23	-0.0386083	0.0837158	-0.461184	0.644667	0.88255	FALSE	NoSigChange
ATAC	CCCCGn	Simple_repeat	Simple_repeat	TKO.DMSO.vs.J1.DMSO	39702.9	-0.0833573	0.184427	-0.45198	0.651283	0.88348	FALSE	NoSigChange
ATAC	CCCGAAn	Simple_repeat	Simple_repeat	TKO.DMSO.vs.J1.DMSO	224.699	0.158488	0.236296	0.67072	0.502399	0.820789	FALSE	NoSigChange
ATAC	CCCGAn	Simple_repeat	Simple_repeat	TKO.DMSO.vs.J1.DMSO	186.976	0.145108	0.201288	0.720896	0.470973	0.795297	FALSE	NoSigChange
ATAC	CCCGGn	Simple_repeat	Simple_repeat	TKO.DMSO.vs.J1.DMSO	1313.51	0.0323128	0.220267	0.146698	0.88337	0.962251	FALSE	NoSigChange
ATAC	CCCGn	Simple_repeat	Simple_repeat	TKO.DMSO.vs.J1.DMSO	4481.17	0.0278517	0.196583	0.141679	0.887334	0.962251	FALSE	NoSigChange
ATAC	CCCTAAn	Simple_repeat	Simple_repeat	TKO.DMSO.vs.J1.DMSO	8346.14	0.334539	0.0814418	4.10771	3.99604e-05	0.0011218	TRUE	SigIncrease
ATAC	CCCTAGn	Simple_repeat	Simple_repeat	TKO.DMSO.vs.J1.DMSO	457.856	-0.0154748	0.0954965	-0.162046	0.87127	0.959709	FALSE	NoSigChange
ATAC	CCCTAn	Simple_repeat	Simple_repeat	TKO.DMSO.vs.J1.DMSO	50.5441	-0.0282765	0.19291	-0.146579	0.883465	0.962251	FALSE	NoSigChange
ATAC	CCCTGn	Simple_repeat	Simple_repeat	TKO.DMSO.vs.J1.DMSO	1736.26	-0.132306	0.121574	-1.08827	0.276474	0.680626	FALSE	NoSigChange
ATAC	CCGAAn	Simple_repeat	Simple_repeat	TKO.DMSO.vs.J1.DMSO	83.9884	0.210916	0.213753	0.986729	0.323776	0.723458	FALSE	NoSigChange
ATAC	CCGAGn	Simple_repeat	Simple_repeat	TKO.DMSO.vs.J1.DMSO	1210.93	-0.138831	0.190872	-0.727351	0.467011	0.795204	FALSE	NoSigChange
ATAC	CCGCGn	Simple_repeat	Simple_repeat	TKO.DMSO.vs.J1.DMSO	6586.92	0.02778	0.203637	0.136419	0.89149	0.96256	FALSE	NoSigChange
ATAC	CCGGAn	Simple_repeat	Simple_repeat	TKO.DMSO.vs.J1.DMSO	95.0017	0.223545	0.251034	0.890499	0.373198	0.751443	FALSE	NoSigChange
ATAC	CCGGGn	Simple_repeat	Simple_repeat	TKO.DMSO.vs.J1.DMSO	1607.57	0.106882	0.230543	0.463609	0.642928	0.88255	FALSE	NoSigChange
ATAC	CCGGn	Simple_repeat	Simple_repeat	TKO.DMSO.vs.J1.DMSO	298.532	-0.0884634	0.228462	-0.387212	0.698599	0.898468	FALSE	NoSigChange
ATAC	CCGn	Simple_repeat	Simple_repeat	TKO.DMSO.vs.J1.DMSO	54062.7	0.0270088	0.20566	0.131328	0.895516	0.965129	FALSE	NoSigChange
ATAC	CCGTAn	Simple_repeat	Simple_repeat	TKO.DMSO.vs.J1.DMSO	11.9543	1.11646	0.401057	2.78379	0.00537274	0.058419	FALSE	NoSigChange
ATAC	CCTAAn	Simple_repeat	Simple_repeat	TKO.DMSO.vs.J1.DMSO	79.5108	-0.0396571	0.143229	-0.276879	0.781873	0.931491	FALSE	NoSigChange
ATAC	CCTAGn	Simple_repeat	Simple_repeat	TKO.DMSO.vs.J1.DMSO	226.018	0.0808659	0.134068	0.603168	0.546397	0.841953	FALSE	NoSigChange
ATAC	CCTAn	Simple_repeat	Simple_repeat	TKO.DMSO.vs.J1.DMSO	1690.23	0.0693198	0.0850476	0.81507	0.415032	0.772684	FALSE	NoSigChange
ATAC	CCTATn	Simple_repeat	Simple_repeat	TKO.DMSO.vs.J1.DMSO	159.378	0.0597121	0.123769	0.48245	0.629487	0.880617	FALSE	NoSigChange
ATAC	CCTCGn	Simple_repeat	Simple_repeat	TKO.DMSO.vs.J1.DMSO	570.898	0.149504	0.166789	0.896366	0.370057	0.74787	FALSE	NoSigChange
ATAC	CCTGn	Simple_repeat	Simple_repeat	TKO.DMSO.vs.J1.DMSO	14600.8	0.526388	0.129318	4.0705	4.69117e-05	0.00129342	TRUE	SigIncrease
ATAC	CCTTGn	Simple_repeat	Simple_repeat	TKO.DMSO.vs.J1.DMSO	333.177	0.0795497	0.104365	0.762224	0.445926	0.787909	FALSE	NoSigChange
ATAC	CENSAT_MC	Satellite	centr	TKO.DMSO.vs.J1.DMSO	32.1143	-0.0842946	0.246549	-0.341898	0.732428	0.909058	FALSE	NoSigChange
ATAC	CGAAAn	Simple_repeat	Simple_repeat	TKO.DMSO.vs.J1.DMSO	391.745	0.714127	0.126064	5.6648	1.47193e-08	6.49333e-07	TRUE	SigIncrease
ATAC	CGAAGn	Simple_repeat	Simple_repeat	TKO.DMSO.vs.J1.DMSO	21.9552	-0.330614	0.28954	-1.14186	0.253511	0.660932	FALSE	NoSigChange
ATAC	CGAAn	Simple_repeat	Simple_repeat	TKO.DMSO.vs.J1.DMSO	172.563	0.244714	0.135076	1.81168	0.0700358	0.353087	FALSE	NoSigChange
ATAC	CGAGAn	Simple_repeat	Simple_repeat	TKO.DMSO.vs.J1.DMSO	37.7179	-0.152647	0.243097	-0.627928	0.530051	0.83326	FALSE	NoSigChange
ATAC	CGAGGn	Simple_repeat	Simple_repeat	TKO.DMSO.vs.J1.DMSO	739.437	-0.101854	0.159836	-0.637239	0.523969	0.831984	FALSE	NoSigChange
ATAC	CGAGn	Simple_repeat	Simple_repeat	TKO.DMSO.vs.J1.DMSO	2641.08	-0.0126241	0.207143	-0.0609438	0.951404	0.9829	FALSE	NoSigChange
ATAC	CGAGTn	Simple_repeat	Simple_repeat	TKO.DMSO.vs.J1.DMSO	1.32382	1.32935	1.36497	0.973903	0.330105	0.73112	FALSE	NoSigChange
ATAC	CGAn	Simple_repeat	Simple_repeat	TKO.DMSO.vs.J1.DMSO	517.579	-0.0191324	0.102938	-0.185863	0.852552	0.951113	FALSE	NoSigChange
ATAC	CGATGn	Simple_repeat	Simple_repeat	TKO.DMSO.vs.J1.DMSO	17.5853	0.723184	0.305772	2.36511	0.0180248	0.148825	FALSE	NoSigChange
ATAC	CGATn	Simple_repeat	Simple_repeat	TKO.DMSO.vs.J1.DMSO	46.5877	0.502077	0.214472	2.341	0.0192323	0.153066	FALSE	NoSigChange
ATAC	CGCGGn	Simple_repeat	Simple_repeat	TKO.DMSO.vs.J1.DMSO	6394.29	0.0282704	0.204049	0.138547	0.889808	0.962251	FALSE	NoSigChange
ATAC	CGCTGn	Simple_repeat	Simple_repeat	TKO.DMSO.vs.J1.DMSO	232.068	0.0431434	0.192209	0.224461	0.822399	0.943644	FALSE	NoSigChange
ATAC	CGGAAn	Simple_repeat	Simple_repeat	TKO.DMSO.vs.J1.DMSO	23.0342	1.03129	0.271954	3.79215	0.00014935	0.00354764	TRUE	SigIncrease
ATAC	CGGAGn	Simple_repeat	Simple_repeat	TKO.DMSO.vs.J1.DMSO	878.502	-0.0070645	0.22024	-0.0320765	0.974411	0.989797	FALSE	NoSigChange
ATAC	CGGAn	Simple_repeat	Simple_repeat	TKO.DMSO.vs.J1.DMSO	542.562	0.100804	0.133326	0.756071	0.449607	0.787909	FALSE	NoSigChange
ATAC	CGGGAn	Simple_repeat	Simple_repeat	TKO.DMSO.vs.J1.DMSO	104.894	0.250639	0.170589	1.46925	0.141764	0.517642	FALSE	NoSigChange
ATAC	CGGGGGn	Simple_repeat	Simple_repeat	TKO.DMSO.vs.J1.DMSO	3368.83	-0.107159	0.169241	-0.633176	0.526618	0.833095	FALSE	NoSigChange
ATAC	CGGGGn	Simple_repeat	Simple_repeat	TKO.DMSO.vs.J1.DMSO	36846.4	-0.0993643	0.185752	-0.534931	0.592698	0.868797	FALSE	NoSigChange
ATAC	CGGGn	Simple_repeat	Simple_repeat	TKO.DMSO.vs.J1.DMSO	4797.44	-0.000637486	0.20292	-0.00314157	0.997493	0.999479	FALSE	NoSigChange
ATAC	CGGn	Simple_repeat	Simple_repeat	TKO.DMSO.vs.J1.DMSO	49074.5	0.0286467	0.205268	0.139557	0.88901	0.962251	FALSE	NoSigChange
ATAC	CGGTGn	Simple_repeat	Simple_repeat	TKO.DMSO.vs.J1.DMSO	271.32	-0.469956	0.148073	-3.17382	0.00150449	0.0213114	TRUE	SigDecrease
ATAC	CGGTn	Simple_repeat	Simple_repeat	TKO.DMSO.vs.J1.DMSO	119.344	-0.112981	0.136978	-0.824813	0.409478	0.772644	FALSE	NoSigChange
ATAC	CGn	Simple_repeat	Simple_repeat	TKO.DMSO.vs.J1.DMSO	6134.85	-0.0747098	0.139551	-0.535358	0.592402	0.868797	FALSE	NoSigChange
ATAC	CGTGn	Simple_repeat	Simple_repeat	TKO.DMSO.vs.J1.DMSO	7250.05	0.157522	0.107226	1.46907	0.141815	0.517642	FALSE	NoSigChange
ATAC	CGTTGn	Simple_repeat	Simple_repeat	TKO.DMSO.vs.J1.DMSO	68.591	0.824463	0.252154	3.26968	0.00107668	0.0166239	TRUE	SigIncrease
ATAC	Chap1_Mam	DNA	hAT-Charlie	TKO.DMSO.vs.J1.DMSO	788.654	-5.96646e-05	0.0914242	-0.000652613	0.999479	0.999479	FALSE	NoSigChange
ATAC	Charlie1	DNA	hAT-Charlie	TKO.DMSO.vs.J1.DMSO	6174.63	0.109559	0.0932732	1.1746	0.240154	0.653965	FALSE	NoSigChange
ATAC	Charlie10	DNA	hAT-Charlie	TKO.DMSO.vs.J1.DMSO	1868.57	0.0239128	0.0961437	0.248719	0.803578	0.937036	FALSE	NoSigChange
ATAC	Charlie10a	DNA	hAT-Charlie	TKO.DMSO.vs.J1.DMSO	325.324	0.0866367	0.0789888	1.09682	0.272719	0.675163	FALSE	NoSigChange
ATAC	Charlie10b	DNA	hAT-Charlie	TKO.DMSO.vs.J1.DMSO	273.953	0.104425	0.111508	0.936477	0.349028	0.743308	FALSE	NoSigChange
ATAC	Charlie11	DNA	hAT-Charlie	TKO.DMSO.vs.J1.DMSO	324.468	0.0505582	0.121771	0.415191	0.678002	0.893966	FALSE	NoSigChange
ATAC	Charlie12	DNA	hAT-Charlie	TKO.DMSO.vs.J1.DMSO	4729.5	0.073371	0.0795826	0.921948	0.356556	0.74607	FALSE	NoSigChange
ATAC	Charlie13a	DNA	hAT-Charlie	TKO.DMSO.vs.J1.DMSO	1487.43	0.195143	0.0464813	4.19832	2.68905e-05	0.000783376	TRUE	SigIncrease
ATAC	Charlie13b	DNA	hAT-Charlie	TKO.DMSO.vs.J1.DMSO	795.969	-0.0244144	0.0768641	-0.31763	0.750765	0.918528	FALSE	NoSigChange
ATAC	Charlie14a	DNA	hAT-Charlie	TKO.DMSO.vs.J1.DMSO	280.268	0.196815	0.109975	1.78964	0.0735111	0.363786	FALSE	NoSigChange
ATAC	Charlie15a	DNA	hAT-Charlie	TKO.DMSO.vs.J1.DMSO	1118.42	0.0723657	0.0703031	1.02934	0.303321	0.706853	FALSE	NoSigChange
ATAC	Charlie15b	DNA	hAT-Charlie	TKO.DMSO.vs.J1.DMSO	1352.98	0.15069	0.0942386	1.59903	0.109814	0.461996	FALSE	NoSigChange
ATAC	Charlie16a	DNA	hAT-Charlie	TKO.DMSO.vs.J1.DMSO	1079.95	0.004635	0.0736163	0.0629616	0.949797	0.982819	FALSE	NoSigChange
ATAC	Charlie17	DNA	hAT-Charlie	TKO.DMSO.vs.J1.DMSO	668.001	0.177579	0.131875	1.34657	0.178119	0.581356	FALSE	NoSigChange
ATAC	Charlie17a	DNA	hAT-Charlie	TKO.DMSO.vs.J1.DMSO	354.641	0.0235306	0.0828895	0.283879	0.776503	0.929396	FALSE	NoSigChange
ATAC	Charlie17b	DNA	hAT-Charlie	TKO.DMSO.vs.J1.DMSO	1065.11	0.0681516	0.0531429	1.28242	0.199695	0.610034	FALSE	NoSigChange
ATAC	Charlie18a	DNA	hAT-Charlie	TKO.DMSO.vs.J1.DMSO	986.263	0.0629355	0.0989702	0.635903	0.52484	0.831984	FALSE	NoSigChange
ATAC	Charlie19a	DNA	hAT-Charlie	TKO.DMSO.vs.J1.DMSO	1354.7	0.0222053	0.0776209	0.286074	0.774821	0.92845	FALSE	NoSigChange
ATAC	Charlie1a	DNA	hAT-Charlie	TKO.DMSO.vs.J1.DMSO	16319.7	0.124721	0.0975598	1.27841	0.201106	0.610034	FALSE	NoSigChange
ATAC	Charlie1b	DNA	hAT-Charlie	TKO.DMSO.vs.J1.DMSO	4897.21	0.0916635	0.0830507	1.10371	0.269721	0.675163	FALSE	NoSigChange
ATAC	Charlie1b_Mars	DNA	hAT-Charlie	TKO.DMSO.vs.J1.DMSO	13.7932	0.788259	0.437901	1.80009	0.0718472	0.357845	FALSE	NoSigChange
ATAC	Charlie20a	DNA	hAT-Charlie	TKO.DMSO.vs.J1.DMSO	977.15	0.207772	0.0929055	2.23638	0.0253267	0.184538	FALSE	NoSigChange
ATAC	Charlie21a	DNA	hAT-Charlie	TKO.DMSO.vs.J1.DMSO	766.724	0.146311	0.161016	0.908674	0.363522	0.747451	FALSE	NoSigChange
ATAC	Charlie22a	DNA	hAT-Charlie	TKO.DMSO.vs.J1.DMSO	774.888	0.176311	0.0860526	2.04887	0.0404745	0.248975	FALSE	NoSigChange
ATAC	Charlie23a	DNA	hAT-Charlie	TKO.DMSO.vs.J1.DMSO	718.87	0.139269	0.0870479	1.59991	0.109618	0.461996	FALSE	NoSigChange
ATAC	Charlie24	DNA	hAT-Charlie	TKO.DMSO.vs.J1.DMSO	2424.51	0.0802127	0.073154	1.09649	0.272864	0.675163	FALSE	NoSigChange
ATAC	Charlie25	DNA	hAT-Charlie	TKO.DMSO.vs.J1.DMSO	1930.72	0.0503599	0.093112	0.540853	0.588609	0.868395	FALSE	NoSigChange
ATAC	Charlie26a	DNA	hAT-Charlie	TKO.DMSO.vs.J1.DMSO	420.164	0.0440095	0.123603	0.356057	0.721798	0.905792	FALSE	NoSigChange
ATAC	Charlie29a	DNA	hAT-Charlie	TKO.DMSO.vs.J1.DMSO	1609.08	0.0339896	0.113439	0.299629	0.76446	0.92793	FALSE	NoSigChange
ATAC	Charlie2a	DNA	hAT-Charlie	TKO.DMSO.vs.J1.DMSO	2569.61	0.12952	0.115872	1.11779	0.263659	0.670168	FALSE	NoSigChange
ATAC	Charlie2b	DNA	hAT-Charlie	TKO.DMSO.vs.J1.DMSO	3879.2	0.109397	0.122872	0.890331	0.373288	0.751443	FALSE	NoSigChange
ATAC	Charlie4	DNA	hAT-Charlie	TKO.DMSO.vs.J1.DMSO	630.3	0.118091	0.112996	1.04509	0.295982	0.703531	FALSE	NoSigChange
ATAC	Charlie4a	DNA	hAT-Charlie	TKO.DMSO.vs.J1.DMSO	5645.17	0.0433943	0.0873773	0.496631	0.619449	0.875453	FALSE	NoSigChange
ATAC	Charlie4z	DNA	hAT-Charlie	TKO.DMSO.vs.J1.DMSO	1807.84	0.0212191	0.0546076	0.388575	0.697591	0.898468	FALSE	NoSigChange
ATAC	Charlie5	DNA	hAT-Charlie	TKO.DMSO.vs.J1.DMSO	6077.08	0.112511	0.119946	0.938012	0.348238	0.743308	FALSE	NoSigChange
ATAC	Charlie6	DNA	hAT-Charlie	TKO.DMSO.vs.J1.DMSO	951.527	0.0165341	0.0994156	0.166312	0.867911	0.957182	FALSE	NoSigChange
ATAC	Charlie7	DNA	hAT-Charlie	TKO.DMSO.vs.J1.DMSO	4292.67	0.105702	0.127679	0.827874	0.407742	0.772459	FALSE	NoSigChange
ATAC	Charlie7a	DNA	hAT-Charlie	TKO.DMSO.vs.J1.DMSO	367.355	0.100578	0.155369	0.647346	0.517408	0.831984	FALSE	NoSigChange
ATAC	Charlie8	DNA	hAT-Charlie	TKO.DMSO.vs.J1.DMSO	4586.7	-0.000364187	0.0489634	-0.00743794	0.994065	0.998593	FALSE	NoSigChange
ATAC	Charlie9	DNA	hAT-Charlie	TKO.DMSO.vs.J1.DMSO	924.922	0.0992145	0.0986635	1.00558	0.314615	0.71341	FALSE	NoSigChange
ATAC	Cheshire	DNA	hAT-Charlie	TKO.DMSO.vs.J1.DMSO	5650.52	0.113502	0.0807782	1.4051	0.15999	0.552945	FALSE	NoSigChange
ATAC	Cheshire_Mars	DNA	hAT-Charlie	TKO.DMSO.vs.J1.DMSO	11.9377	0.323109	0.382293	0.845185	0.398007	0.76813	FALSE	NoSigChange
ATAC	Cheshire_Mars_	DNA	hAT-Charlie	TKO.DMSO.vs.J1.DMSO	55.1764	0.140076	0.174977	0.800536	0.4234	0.776401	FALSE	NoSigChange
ATAC	Cn	Simple_repeat	Simple_repeat	TKO.DMSO.vs.J1.DMSO	4100.1	-0.0315418	0.108356	-0.291093	0.77098	0.92845	FALSE	NoSigChange
ATAC	CR1_Mam	LINE	CR1	TKO.DMSO.vs.J1.DMSO	1492.02	0.111566	0.047598	2.34393	0.0190816	0.153066	FALSE	NoSigChange
ATAC	CT-rich	Low_complexity	Low_complexity	TKO.DMSO.vs.J1.DMSO	104384	-0.0769746	0.0357642	-2.15228	0.031375	0.213406	FALSE	NoSigChange
ATAC	CTAAAn	Simple_repeat	Simple_repeat	TKO.DMSO.vs.J1.DMSO	267.117	0.323499	0.132226	2.44656	0.0144226	0.125312	FALSE	NoSigChange
ATAC	CTAAGn	Simple_repeat	Simple_repeat	TKO.DMSO.vs.J1.DMSO	31.8023	0.507305	0.26445	1.91834	0.0550681	0.312592	FALSE	NoSigChange
ATAC	CTAAn	Simple_repeat	Simple_repeat	TKO.DMSO.vs.J1.DMSO	1152.91	0.132628	0.095581	1.3876	0.16526	0.559564	FALSE	NoSigChange
ATAC	CTAATn	Simple_repeat	Simple_repeat	TKO.DMSO.vs.J1.DMSO	205.044	0.105813	0.143561	0.737055	0.461089	0.794555	FALSE	NoSigChange
ATAC	CTACTn	Simple_repeat	Simple_repeat	TKO.DMSO.vs.J1.DMSO	134.768	0.0670509	0.153399	0.437101	0.662038	0.88348	FALSE	NoSigChange
ATAC	CTAGGGn	Simple_repeat	Simple_repeat	TKO.DMSO.vs.J1.DMSO	671.011	-0.0721729	0.0716159	-1.00778	0.313562	0.71341	FALSE	NoSigChange
ATAC	CTAGGn	Simple_repeat	Simple_repeat	TKO.DMSO.vs.J1.DMSO	284.798	0.318246	0.143772	2.21355	0.0268599	0.189369	FALSE	NoSigChange
ATAC	CTAGn	Simple_repeat	Simple_repeat	TKO.DMSO.vs.J1.DMSO	154.671	-0.153524	0.107518	-1.4279	0.153321	0.54355	FALSE	NoSigChange
ATAC	CTAGTn	Simple_repeat	Simple_repeat	TKO.DMSO.vs.J1.DMSO	74.8439	-0.176506	0.167845	-1.0516	0.292983	0.700257	FALSE	NoSigChange
ATAC	CTAn	Simple_repeat	Simple_repeat	TKO.DMSO.vs.J1.DMSO	2389.87	0.0550427	0.120534	0.456657	0.647918	0.88255	FALSE	NoSigChange
ATAC	CTATAn	Simple_repeat	Simple_repeat	TKO.DMSO.vs.J1.DMSO	721.064	0.223637	0.174838	1.27911	0.200858	0.610034	FALSE	NoSigChange
ATAC	CTATGn	Simple_repeat	Simple_repeat	TKO.DMSO.vs.J1.DMSO	374.505	-0.0721316	0.0826879	-0.872335	0.383026	0.756255	FALSE	NoSigChange
ATAC	CTATTn	Simple_repeat	Simple_repeat	TKO.DMSO.vs.J1.DMSO	354.334	0.200963	0.200157	1.00403	0.315366	0.71341	FALSE	NoSigChange
ATAC	CTCAn	Simple_repeat	Simple_repeat	TKO.DMSO.vs.J1.DMSO	2756.38	0.00331848	0.0524445	0.0632759	0.949547	0.982819	FALSE	NoSigChange
ATAC	CTCCGn	Simple_repeat	Simple_repeat	TKO.DMSO.vs.J1.DMSO	1389.93	-0.046602	0.197138	-0.236393	0.813128	0.939723	FALSE	NoSigChange
ATAC	CTCGGn	Simple_repeat	Simple_repeat	TKO.DMSO.vs.J1.DMSO	2431.64	0.033493	0.192665	0.173841	0.861991	0.956658	FALSE	NoSigChange
ATAC	CTCGn	Simple_repeat	Simple_repeat	TKO.DMSO.vs.J1.DMSO	6257.2	-0.27469	0.186085	-1.47615	0.139904	0.514314	FALSE	NoSigChange
ATAC	CTCTGn	Simple_repeat	Simple_repeat	TKO.DMSO.vs.J1.DMSO	4653.42	0.344734	0.104575	3.29654	0.000978837	0.0154217	TRUE	SigIncrease
ATAC	CTGGGGn	Simple_repeat	Simple_repeat	TKO.DMSO.vs.J1.DMSO	7142.35	0.0215155	0.152823	0.140787	0.888038	0.962251	FALSE	NoSigChange
ATAC	CTGn	Simple_repeat	Simple_repeat	TKO.DMSO.vs.J1.DMSO	17939.9	-0.00927988	0.114785	-0.0808456	0.935565	0.977755	FALSE	NoSigChange
ATAC	CTGTGn	Simple_repeat	Simple_repeat	TKO.DMSO.vs.J1.DMSO	9723.73	0.0352901	0.0763632	0.462135	0.643985	0.88255	FALSE	NoSigChange
ATAC	CTTAAn	Simple_repeat	Simple_repeat	TKO.DMSO.vs.J1.DMSO	12.8249	0.596299	0.401563	1.48495	0.137558	0.512003	FALSE	NoSigChange
ATAC	CTTAGn	Simple_repeat	Simple_repeat	TKO.DMSO.vs.J1.DMSO	64.9637	-0.155103	0.175847	-0.882039	0.377756	0.752801	FALSE	NoSigChange
ATAC	CTTAn	Simple_repeat	Simple_repeat	TKO.DMSO.vs.J1.DMSO	776.122	0.241584	0.130344	1.85344	0.0638191	0.339782	FALSE	NoSigChange
ATAC	CTTATn	Simple_repeat	Simple_repeat	TKO.DMSO.vs.J1.DMSO	76.5263	-0.0191534	0.179554	-0.106672	0.915049	0.969811	FALSE	NoSigChange
ATAC	CTTCGn	Simple_repeat	Simple_repeat	TKO.DMSO.vs.J1.DMSO	8.48645	0.647434	0.393028	1.6473	0.0994969	0.431526	FALSE	NoSigChange
ATAC	CTTGn	Simple_repeat	Simple_repeat	TKO.DMSO.vs.J1.DMSO	3018.57	0.0654488	0.0522523	1.25255	0.210368	0.612846	FALSE	NoSigChange
ATAC	CTTTAn	Simple_repeat	Simple_repeat	TKO.DMSO.vs.J1.DMSO	17.1908	0.144682	0.358316	0.403785	0.686371	0.896579	FALSE	NoSigChange
ATAC	CTTTGn	Simple_repeat	Simple_repeat	TKO.DMSO.vs.J1.DMSO	1062.64	0.0348539	0.0613721	0.567911	0.570096	0.857423	FALSE	NoSigChange
ATAC	CYRA11_Mm	Unknown	Y-chromosome	TKO.DMSO.vs.J1.DMSO	9267.23	0.065339	0.0681293	0.959045	0.337536	0.732737	FALSE	NoSigChange
ATAC	DNA1_Mam	DNA	TcMar	TKO.DMSO.vs.J1.DMSO	184.721	0.117563	0.103208	1.13908	0.25467	0.661017	FALSE	NoSigChange
ATAC	ERV3-16A3_I-int	LTR	ERVL	TKO.DMSO.vs.J1.DMSO	7162.41	-0.0436767	0.0738856	-0.59114	0.554426	0.84672	FALSE	NoSigChange
ATAC	ERV3-16A3_LTR	LTR	ERVL	TKO.DMSO.vs.J1.DMSO	2359.93	-0.0995875	0.0464026	-2.14616	0.0318601	0.214812	FALSE	NoSigChange
ATAC	ERVB2_1-I_MM-int	LTR	ERVK	TKO.DMSO.vs.J1.DMSO	913.455	0.0567358	0.114334	0.496227	0.619734	0.875453	FALSE	NoSigChange
ATAC	ERVB2_1A-I_MM-int	LTR	ERVK	TKO.DMSO.vs.J1.DMSO	3914.39	0.0738391	0.0692531	1.06622	0.286324	0.696195	FALSE	NoSigChange
ATAC	ERVB3_1-I_MM-int	LTR	ERVK	TKO.DMSO.vs.J1.DMSO	1968.09	0.135094	0.0899941	1.50114	0.13332	0.508261	FALSE	NoSigChange
ATAC	ERVB3_1-LTR_MM	LTR	ERVK	TKO.DMSO.vs.J1.DMSO	2578.83	0.65213	0.0962494	6.77542	1.24041e-11	9.576e-10	TRUE	SigIncrease
ATAC	ERVB4_1-I_MM-int	LTR	ERVK	TKO.DMSO.vs.J1.DMSO	8887.65	-0.0333404	0.0549299	-0.606963	0.543875	0.841189	FALSE	NoSigChange
ATAC	ERVB4_1-LTR_MM	LTR	ERVK	TKO.DMSO.vs.J1.DMSO	97.6821	0.198745	0.155042	1.28188	0.199885	0.610034	FALSE	NoSigChange
ATAC	ERVB4_1B-I_MM-int	LTR	ERVK	TKO.DMSO.vs.J1.DMSO	16880.6	0.10997	0.0820623	1.34008	0.180219	0.583351	FALSE	NoSigChange
ATAC	ERVB4_1B-LTR_MM	LTR	ERVK	TKO.DMSO.vs.J1.DMSO	10312.7	0.0411504	0.0541099	0.760496	0.446958	0.787909	FALSE	NoSigChange
ATAC	ERVB4_1C-LTR_Mm	LTR	ERVK	TKO.DMSO.vs.J1.DMSO	12028	0.0294819	0.065048	0.453233	0.650381	0.88348	FALSE	NoSigChange
ATAC	ERVB4_2-I_MM-int	LTR	ERVK	TKO.DMSO.vs.J1.DMSO	12499.5	0.100457	0.0631015	1.59199	0.111386	0.464811	FALSE	NoSigChange
ATAC	ERVB4_2-LTR_MM	LTR	ERVK	TKO.DMSO.vs.J1.DMSO	2245.86	0.393377	0.0792823	4.96173	6.98691e-07	2.63117e-05	TRUE	SigIncrease
ATAC	ERVB4_3-I_MM-int	LTR	ERVK	TKO.DMSO.vs.J1.DMSO	4079.04	-0.0501625	0.0699548	-0.71707	0.473331	0.796971	FALSE	NoSigChange
ATAC	ERVB4_3-LTR_MM	LTR	ERVK	TKO.DMSO.vs.J1.DMSO	1303.59	0.0113049	0.126699	0.0892265	0.928902	0.97396	FALSE	NoSigChange
ATAC	ERVB5_1-I_MM-int	LTR	ERVK	TKO.DMSO.vs.J1.DMSO	5490.81	0.0129385	0.0613437	0.210919	0.832951	0.943644	FALSE	NoSigChange
ATAC	ERVB5_1-LTR_MM	LTR	ERVK	TKO.DMSO.vs.J1.DMSO	1769.84	-0.0988503	0.0724147	-1.36506	0.172235	0.569444	FALSE	NoSigChange
ATAC	ERVB5_2-LTR_MM	LTR	ERVK	TKO.DMSO.vs.J1.DMSO	3869.95	0.0037026	0.0519161	0.071319	0.943144	0.979297	FALSE	NoSigChange
ATAC	ERVB7_1-LTR_MM	LTR	ERVK	TKO.DMSO.vs.J1.DMSO	29921.9	0.308477	0.139035	2.21869	0.0265076	0.188607	FALSE	NoSigChange
ATAC	ERVB7_2-LTR_MM	LTR	ERVK	TKO.DMSO.vs.J1.DMSO	12119.7	-0.0544659	0.122903	-0.44316	0.65765	0.88348	FALSE	NoSigChange
ATAC	ERVB7_2B-LTR_MM	LTR	ERVK	TKO.DMSO.vs.J1.DMSO	15660	0.0606315	0.119424	0.507702	0.611663	0.873398	FALSE	NoSigChange
ATAC	ERVB7_3-LTR_MM	LTR	ERVK	TKO.DMSO.vs.J1.DMSO	10034.6	-0.335485	0.0958698	-3.49938	0.000466347	0.00827631	TRUE	SigDecrease
ATAC	ERVB7_4-LTR_MM	LTR	ERVK	TKO.DMSO.vs.J1.DMSO	5647.1	-0.198176	0.0891983	-2.22174	0.0263007	0.188607	FALSE	NoSigChange
ATAC	ERVL-B4-int	LTR	ERVL	TKO.DMSO.vs.J1.DMSO	12318.9	-0.0166991	0.071285	-0.234259	0.814784	0.940932	FALSE	NoSigChange
ATAC	ERVL-E-int	LTR	ERVL	TKO.DMSO.vs.J1.DMSO	8143.12	0.00310793	0.0626167	0.0496342	0.960414	0.986613	FALSE	NoSigChange
ATAC	ERVL-int	LTR	ERVL	TKO.DMSO.vs.J1.DMSO	6118.91	-0.0179942	0.0849872	-0.211728	0.832319	0.943644	FALSE	NoSigChange
ATAC	ETnERV-int	LTR	ERVK	TKO.DMSO.vs.J1.DMSO	42933.5	0.262421	0.0831037	3.15775	0.00158994	0.0221159	TRUE	SigIncrease
ATAC	ETnERV2-int	LTR	ERVK	TKO.DMSO.vs.J1.DMSO	29852.1	0.0971819	0.07519	1.29248	0.196189	0.604624	FALSE	NoSigChange
ATAC	ETnERV3-int	LTR	ERVK	TKO.DMSO.vs.J1.DMSO	12381.4	0.149484	0.110051	1.35832	0.174363	0.571586	FALSE	NoSigChange
ATAC	Eulor1	DNA	DNA	TKO.DMSO.vs.J1.DMSO	175.253	0.114458	0.192894	0.593369	0.552934	0.845278	FALSE	NoSigChange
ATAC	Eulor10	DNA?	DNA?	TKO.DMSO.vs.J1.DMSO	127.4	-0.159929	0.137862	-1.16007	0.246019	0.658104	FALSE	NoSigChange
ATAC	Eulor11	DNA	DNA	TKO.DMSO.vs.J1.DMSO	329.241	0.0726115	0.11264	0.644631	0.519166	0.831984	FALSE	NoSigChange
ATAC	Eulor12	DNA?	DNA?	TKO.DMSO.vs.J1.DMSO	153.806	0.120008	0.114839	1.04501	0.296017	0.703531	FALSE	NoSigChange
ATAC	Eulor2A	DNA?	DNA?	TKO.DMSO.vs.J1.DMSO	206.983	0.255402	0.0946098	2.69953	0.00694366	0.0734316	FALSE	NoSigChange
ATAC	Eulor2B	DNA?	DNA?	TKO.DMSO.vs.J1.DMSO	230.385	0.0491735	0.112396	0.437503	0.661747	0.88348	FALSE	NoSigChange
ATAC	Eulor2C	DNA?	DNA?	TKO.DMSO.vs.J1.DMSO	98.8422	0.0779266	0.153864	0.506463	0.612532	0.873398	FALSE	NoSigChange
ATAC	Eulor3	DNA?	DNA?	TKO.DMSO.vs.J1.DMSO	132.553	0.147922	0.167531	0.882952	0.377262	0.752801	FALSE	NoSigChange
ATAC	Eulor4	Unknown	Unknown	TKO.DMSO.vs.J1.DMSO	102.603	0.397638	0.204272	1.94661	0.0515817	0.301606	FALSE	NoSigChange
ATAC	Eulor5A	DNA?	DNA?	TKO.DMSO.vs.J1.DMSO	459.333	0.145061	0.105953	1.3691	0.170966	0.568281	FALSE	NoSigChange
ATAC	Eulor5B	DNA?	DNA?	TKO.DMSO.vs.J1.DMSO	167.477	0.224803	0.131346	1.71153	0.0869838	0.40403	FALSE	NoSigChange
ATAC	Eulor6A	DNA?	DNA?	TKO.DMSO.vs.J1.DMSO	78.8432	-0.0759887	0.160295	-0.474054	0.635462	0.881539	FALSE	NoSigChange
ATAC	Eulor6B	DNA?	DNA?	TKO.DMSO.vs.J1.DMSO	289.914	0.177927	0.119441	1.48967	0.136312	0.512003	FALSE	NoSigChange
ATAC	Eulor6C	DNA?	DNA?	TKO.DMSO.vs.J1.DMSO	58.5818	0.103439	0.198655	0.520697	0.602578	0.868913	FALSE	NoSigChange
ATAC	Eulor6D	DNA?	DNA?	TKO.DMSO.vs.J1.DMSO	479.39	-0.17392	0.0925628	-1.87894	0.0602526	0.330403	FALSE	NoSigChange
ATAC	Eulor6E	DNA?	DNA?	TKO.DMSO.vs.J1.DMSO	94.8811	0.141071	0.144577	0.975755	0.329186	0.73112	FALSE	NoSigChange
ATAC	Eulor8	DNA	TcMar?	TKO.DMSO.vs.J1.DMSO	851.839	-0.0562448	0.0765821	-0.734438	0.462682	0.795204	FALSE	NoSigChange
ATAC	Eulor9A	DNA	DNA	TKO.DMSO.vs.J1.DMSO	298.505	0.262408	0.119382	2.19806	0.0279451	0.195236	FALSE	NoSigChange
ATAC	Eulor9B	DNA	DNA	TKO.DMSO.vs.J1.DMSO	49.1246	0.14491	0.211242	0.685989	0.49272	0.814471	FALSE	NoSigChange
ATAC	Eulor9C	DNA	DNA	TKO.DMSO.vs.J1.DMSO	290.526	0.013391	0.0921989	0.14524	0.884521	0.962251	FALSE	NoSigChange
ATAC	FAM	SINE	Alu	TKO.DMSO.vs.J1.DMSO	473.98	-0.0112506	0.0767706	-0.146548	0.883489	0.962251	FALSE	NoSigChange
ATAC	FordPrefect	DNA	hAT-Tip100	TKO.DMSO.vs.J1.DMSO	2866.2	-0.0276141	0.0461318	-0.59859	0.549446	0.843756	FALSE	NoSigChange
ATAC	FordPrefect_a	DNA	hAT-Tip100	TKO.DMSO.vs.J1.DMSO	382.136	-0.0518315	0.0948542	-0.546433	0.584768	0.867322	FALSE	NoSigChange
ATAC	G-rich	Low_complexity	Low_complexity	TKO.DMSO.vs.J1.DMSO	162631	-0.108857	0.11863	-0.917617	0.35882	0.74607	FALSE	NoSigChange
ATAC	GA-rich	Low_complexity	Low_complexity	TKO.DMSO.vs.J1.DMSO	104513	-0.0822117	0.0362879	-2.26554	0.0234795	0.177708	FALSE	NoSigChange
ATAC	GAAAAn	Simple_repeat	Simple_repeat	TKO.DMSO.vs.J1.DMSO	5755.25	0.0967068	0.127588	0.757964	0.448472	0.787909	FALSE	NoSigChange
ATAC	GAAAn	Simple_repeat	Simple_repeat	TKO.DMSO.vs.J1.DMSO	23145.4	0.0122127	0.139412	0.0876016	0.930193	0.97396	FALSE	NoSigChange
ATAC	GAAn	Simple_repeat	Simple_repeat	TKO.DMSO.vs.J1.DMSO	12557	-0.0362239	0.137017	-0.264375	0.791491	0.933897	FALSE	NoSigChange
ATAC	GAATGn	Simple_repeat	Simple_repeat	TKO.DMSO.vs.J1.DMSO	120.754	0.00499776	0.151584	0.0329701	0.973698	0.989797	FALSE	NoSigChange
ATAC	GACTGn	Simple_repeat	Simple_repeat	TKO.DMSO.vs.J1.DMSO	140.267	-0.0397656	0.154022	-0.258182	0.796267	0.933897	FALSE	NoSigChange
ATAC	GAGAAn	Simple_repeat	Simple_repeat	TKO.DMSO.vs.J1.DMSO	5373.93	-0.0904376	0.0797242	-1.13438	0.256635	0.661017	FALSE	NoSigChange
ATAC	GAGTGn	Simple_repeat	Simple_repeat	TKO.DMSO.vs.J1.DMSO	272.116	0.161282	0.108538	1.48595	0.137293	0.512003	FALSE	NoSigChange
ATAC	GAn	Simple_repeat	Simple_repeat	TKO.DMSO.vs.J1.DMSO	146571	-0.106383	0.0587754	-1.81	0.0702963	0.353087	FALSE	NoSigChange
ATAC	GATTGn	Simple_repeat	Simple_repeat	TKO.DMSO.vs.J1.DMSO	47.8035	0.181755	0.190217	0.955513	0.339318	0.732737	FALSE	NoSigChange
ATAC	GC_rich	Low_complexity	Low_complexity	TKO.DMSO.vs.J1.DMSO	345401	0.00551072	0.203323	0.0271033	0.978377	0.991868	FALSE	NoSigChange
ATAC	GCATGn	Simple_repeat	Simple_repeat	TKO.DMSO.vs.J1.DMSO	146.124	0.211156	0.122982	1.71696	0.085986	0.403533	FALSE	NoSigChange
ATAC	GCCTAAn	Simple_repeat	Simple_repeat	TKO.DMSO.vs.J1.DMSO	286.14	0.333031	0.109083	3.053	0.0022657	0.0287052	TRUE	SigIncrease
ATAC	GCCTGn	Simple_repeat	Simple_repeat	TKO.DMSO.vs.J1.DMSO	730.564	0.282301	0.166135	1.69923	0.0892752	0.410241	FALSE	NoSigChange
ATAC	GCGTGn	Simple_repeat	Simple_repeat	TKO.DMSO.vs.J1.DMSO	182.534	-0.130496	0.180988	-0.721021	0.470896	0.795297	FALSE	NoSigChange
ATAC	GCTGn	Simple_repeat	Simple_repeat	TKO.DMSO.vs.J1.DMSO	1384.49	-0.0100466	0.1056	-0.0951384	0.924205	0.973378	FALSE	NoSigChange
ATAC	GCTTGn	Simple_repeat	Simple_repeat	TKO.DMSO.vs.J1.DMSO	263.293	-0.249107	0.108583	-2.29416	0.0217812	0.167314	FALSE	NoSigChange
ATAC	GGAAAn	Simple_repeat	Simple_repeat	TKO.DMSO.vs.J1.DMSO	3243.08	-0.0746054	0.107676	-0.692871	0.48839	0.810833	FALSE	NoSigChange
ATAC	GGAAn	Simple_repeat	Simple_repeat	TKO.DMSO.vs.J1.DMSO	19748.9	-0.0984978	0.0897841	-1.09705	0.272619	0.675163	FALSE	NoSigChange
ATAC	GGAGAAn	Simple_repeat	Simple_repeat	TKO.DMSO.vs.J1.DMSO	3942.51	-0.0100416	0.062053	-0.161823	0.871445	0.959709	FALSE	NoSigChange
ATAC	GGAGAn	Simple_repeat	Simple_repeat	TKO.DMSO.vs.J1.DMSO	6820.35	-0.111799	0.0556162	-2.0102	0.0444103	0.266807	FALSE	NoSigChange
ATAC	GGAn	Simple_repeat	Simple_repeat	TKO.DMSO.vs.J1.DMSO	30694.2	-0.0507188	0.0588791	-0.861405	0.389015	0.763201	FALSE	NoSigChange
ATAC	GGATGn	Simple_repeat	Simple_repeat	TKO.DMSO.vs.J1.DMSO	1553.04	-0.109304	0.103547	-1.05559	0.291155	0.699937	FALSE	NoSigChange
ATAC	GGCTGn	Simple_repeat	Simple_repeat	TKO.DMSO.vs.J1.DMSO	3218.91	-0.04523	0.140067	-0.322918	0.746757	0.917635	FALSE	NoSigChange
ATAC	GGGAAn	Simple_repeat	Simple_repeat	TKO.DMSO.vs.J1.DMSO	3424.44	-0.171365	0.0495824	-3.45617	0.000547908	0.00950529	TRUE	SigDecrease
ATAC	GGGAGAn	Simple_repeat	Simple_repeat	TKO.DMSO.vs.J1.DMSO	9962.54	-0.112775	0.0437167	-2.57967	0.00988946	0.0954333	FALSE	NoSigChange
ATAC	GGGAn	Simple_repeat	Simple_repeat	TKO.DMSO.vs.J1.DMSO	19113	-0.11475	0.0597443	-1.92069	0.0547714	0.312056	FALSE	NoSigChange
ATAC	GGGGAn	Simple_repeat	Simple_repeat	TKO.DMSO.vs.J1.DMSO	6157.58	-0.0336251	0.0754278	-0.445793	0.655747	0.88348	FALSE	NoSigChange
ATAC	GGGTGn	Simple_repeat	Simple_repeat	TKO.DMSO.vs.J1.DMSO	6088.48	-0.115216	0.106113	-1.08578	0.277576	0.680626	FALSE	NoSigChange
ATAC	GGTTGn	Simple_repeat	Simple_repeat	TKO.DMSO.vs.J1.DMSO	432.721	0.0410491	0.0719071	0.570863	0.568092	0.856577	FALSE	NoSigChange
ATAC	Gn	Simple_repeat	Simple_repeat	TKO.DMSO.vs.J1.DMSO	3800.78	0.0142	0.099234	0.143097	0.886214	0.962251	FALSE	NoSigChange
ATAC	GSAT_MM	Satellite	Satellite	TKO.DMSO.vs.J1.DMSO	644.374	0.13828	0.103958	1.33015	0.183467	0.586383	FALSE	NoSigChange
ATAC	GTATGn	Simple_repeat	Simple_repeat	TKO.DMSO.vs.J1.DMSO	412.972	-0.00345173	0.104345	-0.0330798	0.973611	0.989797	FALSE	NoSigChange
ATAC	GTCTGn	Simple_repeat	Simple_repeat	TKO.DMSO.vs.J1.DMSO	410.33	0.418417	0.106528	3.92777	8.57367e-05	0.00228237	TRUE	SigIncrease
ATAC	GTGTGn	Simple_repeat	Simple_repeat	TKO.DMSO.vs.J1.DMSO	2031.45	-0.0440518	0.0602233	-0.731474	0.46449	0.795204	FALSE	NoSigChange
ATAC	GTTTGn	Simple_repeat	Simple_repeat	TKO.DMSO.vs.J1.DMSO	6379.07	0.110747	0.0569845	1.94346	0.0519607	0.301606	FALSE	NoSigChange
ATAC	HAL1	LINE	L1	TKO.DMSO.vs.J1.DMSO	20665.5	0.0979572	0.0751965	1.30268	0.192683	0.600677	FALSE	NoSigChange
ATAC	HAL1_SS	LINE	L1	TKO.DMSO.vs.J1.DMSO	189.258	0.21532	0.20815	1.03445	0.300927	0.706127	FALSE	NoSigChange
ATAC	HAL1b	LINE	L1	TKO.DMSO.vs.J1.DMSO	3430	0.0625748	0.11178	0.559804	0.575613	0.860868	FALSE	NoSigChange
ATAC	HAL1M8	LINE	L1	TKO.DMSO.vs.J1.DMSO	4162.2	0.105505	0.0785474	1.3432	0.179209	0.581356	FALSE	NoSigChange
ATAC	HAL1ME	LINE	L1	TKO.DMSO.vs.J1.DMSO	4132.5	0.0651068	0.0978248	0.665545	0.505702	0.821899	FALSE	NoSigChange
ATAC	hAT-N1_Mam	DNA	hAT?	TKO.DMSO.vs.J1.DMSO	864.554	0.0472802	0.0941408	0.502228	0.615507	0.873477	FALSE	NoSigChange
ATAC	Helitron1Na_Mam	RC	Helitron	TKO.DMSO.vs.J1.DMSO	329.468	0.0842507	0.105737	0.796798	0.425568	0.776452	FALSE	NoSigChange
ATAC	Helitron1Nb_Mam	RC	Helitron	TKO.DMSO.vs.J1.DMSO	413.481	0.167679	0.115925	1.44645	0.148052	0.531608	FALSE	NoSigChange
ATAC	Helitron2Na_Mam	RC?	Helitron?	TKO.DMSO.vs.J1.DMSO	298.433	-0.0197378	0.116955	-0.168764	0.865982	0.957182	FALSE	NoSigChange
ATAC	Helitron3Na_Mam	RC	Helitron	TKO.DMSO.vs.J1.DMSO	1133.3	0.0135047	0.0752682	0.179421	0.857607	0.955372	FALSE	NoSigChange
ATAC	HERV16-int	LTR	ERVL	TKO.DMSO.vs.J1.DMSO	1979.6	0.0236583	0.075152	0.314806	0.752909	0.918966	FALSE	NoSigChange
ATAC	HERVL40-int	LTR	ERVL	TKO.DMSO.vs.J1.DMSO	1439.68	0.0386768	0.0717663	0.538927	0.589937	0.868797	FALSE	NoSigChange
ATAC	HERVL74-int	LTR	ERVL	TKO.DMSO.vs.J1.DMSO	1061.35	0.0889017	0.0915763	0.970794	0.331651	0.73112	FALSE	NoSigChange
ATAC	HUERS-P3b-int	LTR	ERV1	TKO.DMSO.vs.J1.DMSO	11.1247	-0.314106	0.406646	-0.772431	0.439859	0.786376	FALSE	NoSigChange
ATAC	HY1	scRNA	scRNA	TKO.DMSO.vs.J1.DMSO	273.729	0.0574998	0.101907	0.564236	0.572594	0.859145	FALSE	NoSigChange
ATAC	HY3	scRNA	scRNA	TKO.DMSO.vs.J1.DMSO	125.044	0.0815333	0.148775	0.54803	0.583672	0.867321	FALSE	NoSigChange
ATAC	HY4	scRNA	scRNA	TKO.DMSO.vs.J1.DMSO	11.9922	0.161654	0.372308	0.434194	0.664147	0.884766	FALSE	NoSigChange
ATAC	IAP-d-int	LTR	ERVK	TKO.DMSO.vs.J1.DMSO	14868.4	0.174242	0.0722181	2.41272	0.0158341	0.132869	FALSE	NoSigChange
ATAC	IAP1-MM_I-int	LTR	ERVK	TKO.DMSO.vs.J1.DMSO	9169.9	0.121862	0.0814067	1.49696	0.134404	0.509876	FALSE	NoSigChange
ATAC	IAP1-MM_LTR	LTR	ERVK	TKO.DMSO.vs.J1.DMSO	9149.59	0.350744	0.11543	3.03859	0.00237691	0.0292818	TRUE	SigIncrease
ATAC	IAPA_MM-int	LTR	ERVK	TKO.DMSO.vs.J1.DMSO	2491.51	0.957713	0.102202	9.37078	7.1999e-21	1.85278e-18	TRUE	SigIncrease
ATAC	IAPEy-int	LTR	ERVK	TKO.DMSO.vs.J1.DMSO	33181	0.38983	0.0893555	4.36268	1.28478e-05	0.00041327	TRUE	SigIncrease
ATAC	IAPEY_LTR	LTR	ERVK	TKO.DMSO.vs.J1.DMSO	23597.6	0.923931	0.102983	8.97167	2.92046e-19	5.01022e-17	TRUE	SigIncrease
ATAC	IAPEY2_LTR	LTR	ERVK	TKO.DMSO.vs.J1.DMSO	25352.5	0.634917	0.0948891	6.69114	2.21432e-11	1.42454e-09	TRUE	SigIncrease
ATAC	IAPEY3-int	LTR	ERVK	TKO.DMSO.vs.J1.DMSO	40450.1	0.223484	0.0833272	2.682	0.00731826	0.0763472	FALSE	NoSigChange
ATAC	IAPEY3_LTR	LTR	ERVK	TKO.DMSO.vs.J1.DMSO	10347.5	0.856026	0.097626	8.76842	1.81197e-18	2.79769e-16	TRUE	SigIncrease
ATAC	IAPEY3C_LTR	LTR	ERVK	TKO.DMSO.vs.J1.DMSO	4935.5	0.551558	0.0799187	6.90149	5.14588e-12	4.67367e-10	TRUE	SigIncrease
ATAC	IAPEY4_I-int	LTR	ERVK	TKO.DMSO.vs.J1.DMSO	14577.4	0.044417	0.0388351	1.14373	0.252734	0.660932	FALSE	NoSigChange
ATAC	IAPEY4_LTR	LTR	ERVK	TKO.DMSO.vs.J1.DMSO	8511.29	-0.1019	0.124668	-0.81737	0.413717	0.772684	FALSE	NoSigChange
ATAC	IAPEY5_I-int	LTR	ERVK	TKO.DMSO.vs.J1.DMSO	2406.66	0.114232	0.0898402	1.2715	0.20355	0.610254	FALSE	NoSigChange
ATAC	IAPEY5_LTR	LTR	ERVK	TKO.DMSO.vs.J1.DMSO	3015.32	0.674648	0.0816709	8.26057	1.44984e-16	2.03505e-14	TRUE	SigIncrease
ATAC	IAPEz-int	LTR	ERVK	TKO.DMSO.vs.J1.DMSO	354740	0.344228	0.0716194	4.80634	1.53715e-06	5.27413e-05	TRUE	SigIncrease
ATAC	IAPLTR1_Mm	LTR	ERVK	TKO.DMSO.vs.J1.DMSO	37059.9	1.53968	0.115915	13.2828	2.91173e-40	4.49571e-37	TRUE	SigIncrease
ATAC	IAPLTR1a_Mm	LTR	ERVK	TKO.DMSO.vs.J1.DMSO	36094.3	1.18559	0.10888	10.8889	1.30217e-27	1.00528e-24	TRUE	SigIncrease
ATAC	IAPLTR2_Mm	LTR	ERVK	TKO.DMSO.vs.J1.DMSO	44716	1.01339	0.110132	9.2016	3.52675e-20	7.779e-18	TRUE	SigIncrease
ATAC	IAPLTR2a	LTR	ERVK	TKO.DMSO.vs.J1.DMSO	16382.9	1.14609	0.114159	10.0394	1.02295e-23	3.9486e-21	TRUE	SigIncrease
ATAC	IAPLTR2a2_Mm	LTR	ERVK	TKO.DMSO.vs.J1.DMSO	25227.6	0.540229	0.0805048	6.71051	1.93943e-11	1.30195e-09	TRUE	SigIncrease
ATAC	IAPLTR2b	LTR	ERVK	TKO.DMSO.vs.J1.DMSO	20547.7	1.22836	0.11424	10.7525	5.76868e-27	2.96895e-24	TRUE	SigIncrease
ATAC	IAPLTR3	LTR	ERVK	TKO.DMSO.vs.J1.DMSO	6539.93	0.300935	0.0851135	3.5357	0.000406701	0.00784933	TRUE	SigIncrease
ATAC	IAPLTR3-int	LTR	ERVK	TKO.DMSO.vs.J1.DMSO	25993.1	0.0696987	0.0773008	0.901656	0.36724	0.747717	FALSE	NoSigChange
ATAC	IAPLTR4	LTR	ERVK	TKO.DMSO.vs.J1.DMSO	6432.65	0.479276	0.0826628	5.79797	6.71227e-09	3.45458e-07	TRUE	SigIncrease
ATAC	IAPLTR4_I	LTR	ERVK	TKO.DMSO.vs.J1.DMSO	2852.19	0.355318	0.100021	3.55245	0.000381655	0.00755481	TRUE	SigIncrease
ATAC	ID	SINE	ID	TKO.DMSO.vs.J1.DMSO	33049.7	0.0834439	0.0499854	1.66937	0.0950448	0.421693	FALSE	NoSigChange
ATAC	ID_B1	SINE	B4	TKO.DMSO.vs.J1.DMSO	678024	0.0869115	0.0523938	1.65881	0.0971534	0.424943	FALSE	NoSigChange
ATAC	ID2	SINE	ID	TKO.DMSO.vs.J1.DMSO	23856.7	0.0770946	0.0441999	1.74423	0.0811196	0.387767	FALSE	NoSigChange
ATAC	ID4	SINE	ID	TKO.DMSO.vs.J1.DMSO	99379.4	0.097446	0.0466592	2.08846	0.0367563	0.23181	FALSE	NoSigChange
ATAC	ID4_	SINE	ID	TKO.DMSO.vs.J1.DMSO	105740	0.103497	0.0474883	2.17943	0.0292995	0.202863	FALSE	NoSigChange
ATAC	IMPB_01	Satellite	Satellite	TKO.DMSO.vs.J1.DMSO	147090	0.0278449	0.0495443	0.562021	0.574102	0.859761	FALSE	NoSigChange
ATAC	Kanga1	DNA	TcMar-Tc2	TKO.DMSO.vs.J1.DMSO	1753.78	0.0471896	0.0902893	0.522648	0.601219	0.868913	FALSE	NoSigChange
ATAC	Kanga11a	DNA	TcMar-Tc2	TKO.DMSO.vs.J1.DMSO	1067.62	0.117871	0.105941	1.11261	0.265876	0.672972	FALSE	NoSigChange
ATAC	Kanga1a	DNA	TcMar-Tc2	TKO.DMSO.vs.J1.DMSO	1063.51	0.0118073	0.0976021	0.120974	0.903712	0.967636	FALSE	NoSigChange
ATAC	Kanga1b	DNA	TcMar-Tc2	TKO.DMSO.vs.J1.DMSO	942.063	0.135268	0.0580743	2.32922	0.0198472	0.156348	FALSE	NoSigChange
ATAC	Kanga1c	DNA	TcMar-Tc2	TKO.DMSO.vs.J1.DMSO	883.428	0.10912	0.112693	0.968299	0.332895	0.73218	FALSE	NoSigChange
ATAC	Kanga1d	DNA	TcMar-Tc2	TKO.DMSO.vs.J1.DMSO	704.791	0.0319145	0.07857	0.406193	0.684601	0.896543	FALSE	NoSigChange
ATAC	Kanga2_a	DNA	TcMar-Tc2	TKO.DMSO.vs.J1.DMSO	1851.81	0.106596	0.11501	0.92684	0.35401	0.74607	FALSE	NoSigChange
ATAC	L1_Mm	LINE	L1	TKO.DMSO.vs.J1.DMSO	64132.2	0.0207186	0.119382	0.173548	0.862221	0.956658	FALSE	NoSigChange
ATAC	L1_Mur1	LINE	L1	TKO.DMSO.vs.J1.DMSO	79436.3	-0.0204367	0.128957	-0.158477	0.874081	0.96124	FALSE	NoSigChange
ATAC	L1_Mur2	LINE	L1	TKO.DMSO.vs.J1.DMSO	205283	-0.00960314	0.125468	-0.0765385	0.938991	0.978274	FALSE	NoSigChange
ATAC	L1_Mur3	LINE	L1	TKO.DMSO.vs.J1.DMSO	215914	0.0463178	0.130513	0.354892	0.722671	0.905792	FALSE	NoSigChange
ATAC	L1_Mus1	LINE	L1	TKO.DMSO.vs.J1.DMSO	457034	-0.00982695	0.102178	-0.0961753	0.923381	0.973175	FALSE	NoSigChange
ATAC	L1_Mus2	LINE	L1	TKO.DMSO.vs.J1.DMSO	332668	-0.0205102	0.10408	-0.197062	0.843779	0.947487	FALSE	NoSigChange
ATAC	L1_Mus3	LINE	L1	TKO.DMSO.vs.J1.DMSO	689765	-0.0209168	0.110088	-0.190001	0.849308	0.949168	FALSE	NoSigChange
ATAC	L1_Mus4	LINE	L1	TKO.DMSO.vs.J1.DMSO	208515	-0.0569091	0.100411	-0.566763	0.570875	0.857423	FALSE	NoSigChange
ATAC	L1_Rod	LINE	L1	TKO.DMSO.vs.J1.DMSO	71147.6	0.08963	0.134966	0.664092	0.506632	0.822544	FALSE	NoSigChange
ATAC	L1M	LINE	L1	TKO.DMSO.vs.J1.DMSO	1316.35	0.0955356	0.0994395	0.960741	0.336683	0.732737	FALSE	NoSigChange
ATAC	L1M1	LINE	L1	TKO.DMSO.vs.J1.DMSO	3426.73	0.121995	0.109195	1.11722	0.2639	0.670168	FALSE	NoSigChange
ATAC	L1M2	LINE	L1	TKO.DMSO.vs.J1.DMSO	98954.9	0.102428	0.128171	0.799151	0.424203	0.776452	FALSE	NoSigChange
ATAC	L1M2a	LINE	L1	TKO.DMSO.vs.J1.DMSO	1482.71	0.0320783	0.0817876	0.392215	0.694899	0.898468	FALSE	NoSigChange
ATAC	L1M2a1	LINE	L1	TKO.DMSO.vs.J1.DMSO	49.3316	-0.147536	0.236738	-0.623205	0.53315	0.833407	FALSE	NoSigChange
ATAC	L1M2b	LINE	L1	TKO.DMSO.vs.J1.DMSO	86.0507	-0.0946928	0.154627	-0.612394	0.540277	0.840068	FALSE	NoSigChange
ATAC	L1M2c	LINE	L1	TKO.DMSO.vs.J1.DMSO	1830.72	0.0740919	0.123316	0.600831	0.547953	0.843119	FALSE	NoSigChange
ATAC	L1M3	LINE	L1	TKO.DMSO.vs.J1.DMSO	35379.9	0.107003	0.111876	0.956446	0.338847	0.732737	FALSE	NoSigChange
ATAC	L1M3a	LINE	L1	TKO.DMSO.vs.J1.DMSO	708.17	0.0892643	0.119767	0.745315	0.456081	0.789456	FALSE	NoSigChange
ATAC	L1M3b	LINE	L1	TKO.DMSO.vs.J1.DMSO	1175.03	0.0584208	0.109669	0.532704	0.594239	0.868802	FALSE	NoSigChange
ATAC	L1M3c	LINE	L1	TKO.DMSO.vs.J1.DMSO	1908.97	0.142571	0.122508	1.16377	0.244516	0.658104	FALSE	NoSigChange
ATAC	L1M3d	LINE	L1	TKO.DMSO.vs.J1.DMSO	992.475	0.0935021	0.111545	0.838247	0.401892	0.769109	FALSE	NoSigChange
ATAC	L1M3de	LINE	L1	TKO.DMSO.vs.J1.DMSO	1038.9	0.0142519	0.109421	0.130248	0.89637	0.965129	FALSE	NoSigChange
ATAC	L1M3e	LINE	L1	TKO.DMSO.vs.J1.DMSO	5340.56	0.0374214	0.0582668	0.642241	0.520716	0.831984	FALSE	NoSigChange
ATAC	L1M3f	LINE	L1	TKO.DMSO.vs.J1.DMSO	729.319	-0.017293	0.0992683	-0.174205	0.861704	0.956658	FALSE	NoSigChange
ATAC	L1M4	LINE	L1	TKO.DMSO.vs.J1.DMSO	71184.2	0.132597	0.0987216	1.34314	0.179226	0.581356	FALSE	NoSigChange
ATAC	L1M4a1	LINE	L1	TKO.DMSO.vs.J1.DMSO	3350.37	0.0904764	0.0945978	0.956432	0.338854	0.732737	FALSE	NoSigChange
ATAC	L1M4a2	LINE	L1	TKO.DMSO.vs.J1.DMSO	3825.13	0.0827849	0.10111	0.818762	0.412922	0.772684	FALSE	NoSigChange
ATAC	L1M4b	LINE	L1	TKO.DMSO.vs.J1.DMSO	17956.4	0.0803295	0.042976	1.86917	0.061599	0.334891	FALSE	NoSigChange
ATAC	L1M4c	LINE	L1	TKO.DMSO.vs.J1.DMSO	12076.2	0.124395	0.102367	1.21519	0.224294	0.63143	FALSE	NoSigChange
ATAC	L1M5	LINE	L1	TKO.DMSO.vs.J1.DMSO	72027	0.122048	0.11739	1.03968	0.29849	0.703616	FALSE	NoSigChange
ATAC	L1M6	LINE	L1	TKO.DMSO.vs.J1.DMSO	1857.21	0.103164	0.0681815	1.51308	0.13026	0.502803	FALSE	NoSigChange
ATAC	L1M6B	LINE	L1	TKO.DMSO.vs.J1.DMSO	266.818	-0.0027823	0.0833372	-0.0333861	0.973367	0.989797	FALSE	NoSigChange
ATAC	L1M7	LINE	L1	TKO.DMSO.vs.J1.DMSO	1236.13	0.117001	0.0789723	1.48155	0.138461	0.512003	FALSE	NoSigChange
ATAC	L1M8	LINE	L1	TKO.DMSO.vs.J1.DMSO	1294.81	0.102128	0.0816853	1.25026	0.211203	0.614119	FALSE	NoSigChange
ATAC	L1MA10	LINE	L1	TKO.DMSO.vs.J1.DMSO	4005.42	0.0465078	0.12105	0.384202	0.700828	0.898468	FALSE	NoSigChange
[truncated: 41,094 more rows]

## Sheet: Raw read counts
RepName	RepClass	RepType	Size	Repeats	MedianCpGDensity	MeanCpGDensity	StDevCpGDensity	StErrCpGDensity	milliDiv.Median	milliDiv.Mean	milliDiv.StDev	milliDiv.StErr	J1.DMSO_ATAC_REP1	J1.TSA_ATAC_REP1	TKO.DMSO_ATAC_REP1	TKO.TSA_ATAC_REP1	J1.DMSO_ATAC_REP2	J1.TSA_ATAC_REP2	TKO.DMSO_ATAC_REP2	TKO.TSA_ATAC_REP2	J1.DMSO_ATAC_REP3	J1.TSA_ATAC_REP3	TKO.DMSO_ATAC_REP3	TKO.TSA_ATAC_REP3	J1.DMSO_ATAC_REP4	J1.TSA_ATAC_REP4	TKO.DMSO_ATAC_REP4	TKO.TSA_ATAC_REP4	J1.DMSO_ATAC.Input_REP1	J1.TSA_ATAC.Input_REP1	TKO.DMSO_ATAC.Input_REP1	TKO.TSA_ATAC.Input_REP1	J1.DMSO_ATAC.Input_REP2	J1.TSA_ATAC.Input_REP2	TKO.DMSO_ATAC.Input_REP2	TKO.TSA_ATAC.Input_REP2	J1.DMSO_ATAC.Input_REP3	J1.TSA_ATAC.Input_REP3	TKO.DMSO_ATAC.Input_REP3	TKO.TSA_ATAC.Input_REP3	J1.DMSO_ATAC.Input_REP4	J1.TSA_ATAC.Input_REP4	TKO.DMSO_ATAC.Input_REP4	TKO.TSA_ATAC.Input_REP4	J1.Unt_GABPA_REP1	J1.Unt_GABPA_REP2	J1.Unt_GABPA_REP3	J1.TSA_GABPA_REP1	J1.TSA_GABPA_REP2
4.5SRNA	scRNA	scRNA	107552	1517	0.010989	0.0133327	0.0167331	0.00042962	187	183.515	65.9386	1.69296	15998	13795	18359	15369	17790	14219	19766	16055	18990	16691	20265	19111	15857	13921	20180	16042	1980	1788	1918	1952	1821	2078	2069	2124	1657	1843	1824	1940	1827	1750	1995	1739	10555	11475	11708	7492	6413
5S	rRNA	rRNA	84549	1038	0.0101525	0.0154093	0.0216964	0.000673423	219	206.914	81.2261	2.52114	9731	9161	8582	7701	11656	8885	9496	7630	12181	9549	9481	8358	11651	9231	8477	6833	1468	1221	1322	1417	1330	1595	1396	1395	1165	1292	1276	1373	1337	1272	1371	1311	7236	8178	8510	5594	4438
7SK	RNA	RNA	118548	691	0.00598802	0.00913372	0.0112535	0.000428102	266	256.184	66.593	2.53332	5344	6274	5778	5687	5430	5734	5504	5408	5479	5502	5322	5431	5297	5063	5317	5569	1474	1315	1323	1390	1273	1728	1478	1483	1094	1305	1398	1441	1338	1258	1435	1254	6328	7561	7884	4761	4398
7SLRNA	srpRNA	srpRNA	45826	437	0.00584795	0.00992334	0.0131008	0.000626698	254	249.188	65.4417	3.1305	3544	3381	3338	3093	3376	3397	3464	3147	3565	3510	3718	3328	3526	3277	3622	3269	687	614	594	677	586	666	772	734	536	615	647	713	732	612	683	600	2891	3486	3602	2186	2047
AAATGn	Simple_repeat	Simple_repeat	3999	94	0	0.0021928	0.00825175	0.000851103	38.5	55.7553	69.3485	7.15276	183	299	193	208	183	169	166	167	134	195	146	149	170	146	155	177	61	57	69	70	79	50	52	48	65	76	51	68	73	68	77	86	185	214	224	138	92
AACTGn	Simple_repeat	Simple_repeat	5856	92	0	0.00393536	0.0111932	0.00116697	132.5	136.641	83.4144	8.69656	377	583	414	428	422	381	360	375	375	381	403	429	360	443	359	418	96	99	79	75	77	97	72	66	73	87	91	91	77	86	76	69	340	449	343	270	192
AAGTGn	Simple_repeat	Simple_repeat	1057	10	0	0.00476916	0.00784432	0.00248059	168	152.9	111.824	35.3618	56	45	48	66	56	57	52	68	79	33	71	53	60	46	82	56	7	16	18	20	23	16	22	9	8	14	18	14	12	19	13	13	183	186	269	190	191
AATAGn	Simple_repeat	Simple_repeat	10310	153	0	0.00052531	0.00269672	0.000218017	30	61.2222	72.9558	5.89813	292	540	375	403	307	356	408	366	215	374	222	309	278	321	311	391	141	140	122	93	132	78	94	90	104	144	77	102	128	137	121	126	287	357	310	185	155
AATTGn	Simple_repeat	Simple_repeat	1803	36	0	0.000584513	0.00260459	0.000434098	59	83.8889	90.3757	15.0626	73	111	80	67	55	71	68	84	44	72	63	80	63	71	71	91	34	29	44	34	28	27	22	14	34	19	46	19	27	26	50	41	80	99	107	60	50
ACATGn	Simple_repeat	Simple_repeat	2820	43	0	0.00227473	0.00648038	0.000988249	120	110.395	80.544	12.2828	126	177	154	176	121	165	157	159	127	120	93	143	140	132	118	151	74	54	52	47	30	49	36	43	39	39	54	42	35	51	43	78	244	236	270	156	144
ACCGn	Simple_repeat	Simple_repeat	758	17	0.166667	0.159583	0.0750625	0.0182053	87	102.588	102.591	24.8821	81	86	94	77	76	80	107	85	100	84	98	95	104	82	105	96	33	12	20	17	17	29	23	20	15	21	19	23	22	19	22	14	113	161	165	111	90
ACCTGn	Simple_repeat	Simple_repeat	2229	25	0	0.00941185	0.0238428	0.00476856	42	103.4	113.838	22.7676	181	156	196	143	183	225	232	153	204	159	216	173	139	172	191	136	35	26	33	48	25	30	37	33	20	26	32	28	38	25	33	21	313	373	350	262	267
ACGTGn	Simple_repeat	Simple_repeat	210	4	0.1225	0.133406	0.0538069	0.0269034	61	95.5	114.43	57.2152	15	23	41	41	24	29	49	43	26	14	44	63	12	25	55	49	4	4	8	2	6	3	9	2	4	6	1	5	0	3	5	1	29	35	26	18	21
ACTAGn	Simple_repeat	Simple_repeat	4033	30	0	0.00473863	0.0145625	0.00265874	50.5	83.6667	90.8733	16.5911	195	271	177	216	220	242	183	229	180	217	237	199	202	198	176	240	37	28	37	32	34	40	43	32	19	25	45	57	47	28	40	42	183	201	177	107	90
ACTCGn	Simple_repeat	Simple_repeat	226	3	0.133333	0.109841	0.0945945	0.0546142	0	22.3333	38.6825	22.3333	13	8	12	22	7	14	12	8	11	15	13	12	17	17	12	21	3	3	4	0	2	1	2	4	8	4	0	4	2	2	2	2	22	27	22	14	13
ACTGn	Simple_repeat	Simple_repeat	15734	236	0	0.00340587	0.0122283	0.000795997	74	79.6102	72.1246	4.69491	995	1215	1075	1114	1056	1174	1130	1113	1092	1000	1074	1090	1056	1000	1014	1155	281	217	263	250	296	306	301	286	189	228	285	307	216	230	242	252	1585	1935	1957	1257	1116
ACTTGn	Simple_repeat	Simple_repeat	172	5	0	0	0	0	32	32.6	33.2986	14.8916	15	15	23	24	9	6	12	13	14	7	12	15	9	13	13	10	3	4	11	1	2	8	4	7	10	6	2	3	2	1	5	4	17	23	16	15	10
AGATGn	Simple_repeat	Simple_repeat	2430	41	0	0.0013099	0.00732246	0.00114358	18	58.7073	80.8141	12.621	113	150	95	128	86	135	103	121	89	118	92	103	104	126	87	110	55	56	37	41	32	55	51	45	22	28	43	53	37	52	36	39	148	154	182	150	97
AGCTGn	Simple_repeat	Simple_repeat	6559	80	0	0.00290647	0.00922331	0.0010312	39	80.95	101.563	11.3551	766	692	714	640	804	644	739	655	907	734	848	670	887	758	853	708	102	81	86	90	79	101	94	130	77	81	86	105	75	84	108	99	775	950	1055	717	687
AGGGGGn	Simple_repeat	Simple_repeat	50454	930	0	0.00240753	0.00927348	0.00030409	81	76.5419	40.6239	1.33211	4453	4602	4373	3981	4479	4417	4439	4161	4960	4637	4753	4445	4854	4977	4675	4253	619	491	506	612	542	667	688	711	498	528	565	610	557	496	595	525	3470	3836	3404	2817	2214
AGGTGn	Simple_repeat	Simple_repeat	10197	73	0	0.00621057	0.0148703	0.00174043	141	138.356	104.494	12.23	497	679	503	559	486	593	532	596	602	557	506	513	507	528	468	591	137	137	110	126	108	142	163	148	103	93	116	126	102	88	132	82	1047	1370	1155	1014	775
AGTAGn	Simple_repeat	Simple_repeat	3485	33	0	0.00196807	0.0075649	0.00131688	160	129.455	116.334	20.2511	199	222	220	226	153	188	210	214	170	172	195	229	175	195	214	269	61	33	31	32	27	37	30	41	28	14	47	42	36	26	77	25	207	242	175	148	129
AGTTGn	Simple_repeat	Simple_repeat	1017	20	0	0.00150487	0.00481551	0.00107678	57.5	77.85	80.9173	18.0937	63	75	62	67	51	58	56	48	59	61	53	42	42	48	46	74	35	19	15	17	8	20	18	21	13	22	17	19	25	13	27	9	63	109	123	66	52
AmnSINE1	SINE	Deu	127431	1311	0	0.0079517	0.0109186	0.000301556	279	274.119	57.9171	1.59958	8020	9118	8097	7347	7809	7605	7746	7261	8203	7321	7933	7374	8078	7671	7571	7249	1834	1576	1772	1841	1705	1826	1812	1811	1596	1751	1795	1897	1735	1686	1856	1788	7093	8045	8658	5210	4626
AmnSINE2	SINE	Deu	35320	391	0	0.00713918	0.00962426	0.00048672	280	271.033	65.9148	3.33346	2078	2392	2221	2037	2026	2208	2208	2081	2301	1957	2159	2022	2295	2092	2028	1975	557	540	509	502	491	548	573	501	469	447	505	583	502	456	552	544	2099	2317	2586	1535	1357
An	Simple_repeat	Simple_repeat	939137	29211	0	0.000110534	0.00170895	9.999e-06	37	48.7508	51.4943	0.301291	28691	39705	34167	32886	33664	29101	36857	32487	24465	32683	28618	28679	33476	29103	34132	32152	8344	11247	10861	9695	10970	8688	8777	7767	10821	12397	10334	9741	9973	12742	12390	12724	38805	43499	45602	28390	24551
A-rich	Low_complexity	Low_complexity	2058860	29764	0	0.00142146	0.00537367	3.11476e-05	172	176.259	56.0379	0.324815	49740	75909	56760	59894	52035	50697	55853	54835	40775	53674	43646	45981	49583	48368	47943	54806	17345	25960	24970	23092	25065	24569	24564	23494	23828	27490	24371	25884	24922	28072	28721	28788	71773	81395	76790	52568	43650
Arthur1A	DNA	hAT-Tip100	19043	148	0.00593477	0.00646897	0.00809813	0.000665662	309	300.696	42.0718	3.45828	840	898	838	889	861	896	877	817	734	836	893	824	755	747	779	745	227	229	225	255	215	213	252	240	208	243	270	258	266	235	263	254	747	907	809	523	452
Arthur1B	DNA	hAT-Tip100	128321	597	0.00526316	0.00671248	0.0075507	0.00030903	311	307.637	45.0305	1.84298	3738	4955	3961	4381	3554	3914	3694	3925	3099	3652	3437	3593	3337	3410	3325	3717	1299	1343	1191	1291	1396	1248	1299	1269	1100	1355	1358	1381	1270	1302	1510	1416	3916	4428	4299	2725	2186
Arthur1C	DNA	hAT-Tip100	23696	155	0.00403226	0.00650881	0.00838924	0.00067384	290	282.226	46.1447	3.70643	950	1182	896	1032	888	889	947	916	937	890	875	849	923	921	859	938	258	257	320	270	277	301	281	240	262	263	300	297	309	273	317	296	908	1017	929	608	485
Arthur1	DNA	hAT-Tip100	252139	920	0.00487211	0.00631253	0.00707912	0.000233392	304	304.103	41.1608	1.35703	6017	8375	6162	7203	5597	6183	5837	6574	4811	5868	5148	5492	5151	5336	5128	6094	2289	2477	2377	2323	2345	2359	2414	2172	2263	2536	2369	2570	2530	2496	2652	2567	6418	7430	7099	4343	3753
ATAAGn	Simple_repeat	Simple_repeat	2718	50	0	0.000227272	0.00160706	0.000227272	62.5	75.12	73.942	10.457	83	145	103	138	85	118	110	142	45	87	76	82	60	111	83	151	31	31	47	29	37	43	33	24	27	38	37	41	49	35	21	35	85	87	70	55	47
ATAGGn	Simple_repeat	Simple_repeat	3247	48	0	0.000903291	0.00388424	0.000560642	45.5	85.8542	97.8496	14.1234	178	246	199	206	162	207	212	229	154	190	167	153	194	196	160	194	50	38	45	36	38	41	42	37	40	30	41	47	58	42	36	25	232	241	239	157	135
ATATGn	Simple_repeat	Simple_repeat	18037	239	0	0.00150925	0.00551655	0.000356836	61	85.0962	85.0365	5.50055	407	791	523	637	429	495	499	585	296	506	278	388	402	418	390	521	248	242	227	149	251	155	175	161	223	207	215	195	269	235	214	228	549	604	612	309	317
ATCTGn	Simple_repeat	Simple_repeat	707	14	0	0	0	0	8.5	66.2857	116.491	31.1336	41	62	54	49	48	53	47	46	26	53	48	30	32	37	31	37	22	13	12	9	10	5	13	24	18	12	11	8	19	6	8	8	63	73	94	60	38
ATGGTGn	Simple_repeat	Simple_repeat	90322	1001	0	0.00653561	0.0127601	0.000403307	180	178.632	80.5083	2.54463	3669	4666	3911	4445	3752	4341	3775	4284	3517	3627	3294	3700	3534	3611	3031	4172	1660	1269	1309	1413	1439	1695	1874	1733	1210	1261	1468	1496	1398	1265	1526	1226	7875	9614	8503	6442	5382
ATGn	Simple_repeat	Simple_repeat	140440	2662	0	0.0136396	0.0251664	0.000487772	116	118.885	80.8804	1.56761	6408	8916	6697	7805	6192	7104	6288	7244	5463	6190	5514	5978	5588	5943	5061	6939	2628	2577	2458	2542	2662	3152	2887	2994	2358	2567	2528	2824	2496	2569	2785	2693	10772	12928	11771	8001	6596
ATGTGn	Simple_repeat	Simple_repeat	11038	115	0	0.00517756	0.0138923	0.00129546	70	96.8261	96.1076	8.96208	519	653	487	611	466	608	521	598	467	485	553	501	479	520	439	626	196	127	154	150	112	165	185	185	145	98	139	197	114	117	155	116	980	1218	1034	754	575
AT_rich	Low_complexity	Low_complexity	7474222	228756	0	2.50643e-05	0.00071128	1.48715e-06	25	24.3489	26.9587	0.0563655	168808	441056	247350	294543	196367	172230	263638	293579	105270	254343	123040	165963	164113	155284	230950	284803	84891	161978	141951	114624	155062	58349	63217	52545	149820	167908	105224	75161	140137	163867	96363	162104	251381	274910	253557	164107	143643
ATTAGn	Simple_repeat	Simple_repeat	2703	62	0	0.000645161	0.00508001	0.000645161	25	47.0806	56.9303	7.23016	133	197	134	152	123	113	133	139	82	127	77	119	105	114	100	141	56	62	49	26	50	48	38	38	42	60	37	51	64	55	60	46	103	105	140	72	52
ATTGn	Simple_repeat	Simple_repeat	59893	1709	0	0.00158994	0.0078504	0.000189898	30	43.5407	52.3863	1.2672	3450	4786	3905	4191	3520	3826	3775	4021	2971	3748	3404	3443	3303	3491	3260	4167	1408	1426	1442	1410	1472	1464	1502	1401	1446	1453	1393	1569	1383	1432	1567	1514	4954	5704	5837	3657	3069
ATTTGn	Simple_repeat	Simple_repeat	5009	141	0	0.00114021	0.00609554	0.000513337	40	41.7234	37.295	3.1408	386	435	390	389	369	352	388	346	389	310	361	333	372	360	300	376	123	118	113	109	108	119	106	107	120	122	94	135	117	108	156	107	396	456	499	288	237
B1F1	SINE	Alu	2165359	19678	0	0.00691678	0.00942649	6.71985e-05	266	264.884	47.5197	0.338753	100953	115996	111141	109785	111208	109961	117152	110630	107380	104822	113058	104362	107955	100174	106451	107381	32852	28349	29661	30737	28831	32574	32148	31786	26289	28618	29892	32086	29989	28785	31075	29570	134354	153854	169354	97112	88890
B1F2	SINE	Alu	1848274	16513	0	0.00663439	0.00903105	7.0279e-05	253	251.898	51.1075	0.397715	84814	99368	94937	93910	97011	93390	101507	93784	92000	89100	96754	89873	92683	85600	91928	91886	27733	24615	25727	25961	24623	27983	27452	26499	22939	24661	25468	27549	25717	24343	26566	24805	117630	134424	148746	84887	78260
B1F	SINE	Alu	5005307	45170	0	0.00604682	0.00870012	4.09355e-05	261	259.232	46.8067	0.220233	224786	265315	246864	246311	248078	246657	260369	247343	237431	233784	248634	232487	240911	226753	236017	240542	72637	64079	65746	68660	65013	73456	71513	69558	59405	65365	67410	73012	67858	64156	71325	66180	292730	332007	362977	209507	192366
B1_Mm	SINE	Alu	5667523	42910	0.020979	0.0218941	0.0143553	6.93e-05	62	84.1457	64.8492	0.313058	224013	271741	254060	248951	251952	240682	272840	251007	231780	250901	259222	249277	222922	219960	263323	252577	65394	65348	67552	70093	65836	76150	75028	75104	60885	66644	68261	72379	69170	66264	73204	67969	268073	312908	337810	203157	184085
B1_Mur1	SINE	Alu	4714932	38058	0	0.00579292	0.00770015	3.94708e-05	216	218.452	44.3231	0.2272	197975	233540	225024	221772	227904	221832	243288	225776	214995	214047	228843	212231	220069	202165	220132	219641	67675	58435	61417	63178	60269	66537	65762	63443	54815	59469	63016	66039	62765	59084	65629	60838	274786	312819	346615	197176	182432
B1_Mur2	SINE	Alu	3922228	31869	0	0.00589359	0.00789618	4.42316e-05	201	203.974	45.0732	0.252484	164833	192888	185875	183939	190335	183574	202923	188034	177675	178219	190960	177635	183187	168450	184389	183458	57078	49524	51422	52316	50509	56129	55326	53923	46292	50122	52309	55280	53059	49763	54853	50528	232675	264612	295545	164801	154321
B1_Mur3	SINE	Alu	3080675	24632	0.00675676	0.0070975	0.00873484	5.56551e-05	176	181.483	50.581	0.322283	129979	150609	147481	145120	149784	144607	161102	148365	141956	142577	152062	141269	144106	132826	147812	144686	42651	39397	40874	41837	39731	45509	44115	43593	36900	39963	41487	44389	42336	40018	43873	40643	184876	212185	236573	133675	125112
B1_Mur4	SINE	Alu	5058960	41031	0.00671141	0.00725852	0.00939263	4.63694e-05	162	165.69	53.0636	0.261963	208008	244817	239987	234005	243420	235620	260847	239376	229035	230770	248935	229818	230865	216472	241017	234640	68349	63477	65154	67706	64870	72483	70945	70820	59208	63931	66964	71416	67717	63377	69860	65213	298414	341397	378246	216526	202457
B1_Mus1	SINE	Alu	12773496	95081	0.0135135	0.0137874	0.0115297	3.73914e-05	86	104.165	57.7749	0.187367	510834	610621	577967	561672	585932	561888	623320	572208	543908	571517	592334	558241	540169	516000	591898	571202	154823	149869	154488	159512	152152	173633	170556	170991	139051	151864	158276	168238	160190	150695	165430	154579	681926	791634	874414	508762	471729
B1_Mus2	SINE	Alu	9152348	70891	0.0202703	0.0196853	0.0148777	5.58777e-05	75	99.3389	62.5902	0.235077	400683	454611	454830	430754	460393	429619	498698	441192	432205	441557	481146	443180	415711	394181	480503	442803	111782	108905	113359	117949	110288	128665	125243	126205	102322	111151	116622	123665	117915	110788	122180	113971	522058	604702	674533	393154	365867
B2_Mm1a	SINE	B2	3110270	18346	0.0151135	0.0133979	0.00832551	6.14668e-05	47	58.4932	44.2632	0.326793	113748	137540	140794	139397	140100	117450	165615	153971	127609	144022	150479	140649	128852	108472	183411	155104	30487	32251	32728	32175	31805	31859	31337	31351	30048	32687	30655	29996	33518	31456	30161	31871	121584	144494	145861	86213	78816
B2_Mm1t	SINE	B2	3830855	23218	0.0108696	0.0114769	0.00845058	5.54593e-05	82	85.638	45.5776	0.299116	144006	177176	173082	176712	170140	149099	193760	190423	152419	176506	176929	175075	158644	136955	210096	191429	40272	40809	42054	41912	41479	41389	41077	40089	38248	41110	40428	39476	43382	40763	40070	41477	162636	188831	192057	112091	103793
B2_Mm2	SINE	B2	13924794	90007	0.00520833	0.00527191	0.0066398	2.21318e-05	97	110.061	53.3287	0.177755	553172	678447	635583	629709	650798	586648	700779	664331	582735	653175	629667	615440	615269	547409	721538	662163	162253	158403	159848	157931	159728	155014	153926	149345	147160	159729	155986	153571	164588	157627	156592	160310	608626	698061	720854	421095	385661
B3A	SINE	B2	13977158	92925	0.00571429	0.00791234	0.0101094	3.31634e-05	260	260.704	45.7199	0.149982	596617	723334	670628	676027	641700	644206	689090	676262	610289	634461	657403	632392	608821	580998	665208	653821	179820	159270	161779	166319	160939	175837	173664	167444	145368	158208	164015	172663	167342	157916	169288	160637	697946	813003	866151	510349	462978
B3	SINE	B2	24953478	148427	0.00526316	0.00714003	0.00812873	2.10992e-05	229	231.221	46.3797	0.120385	995197	1202632	1142924	1137445	1109287	1081894	1200714	1143631	1040505	1088136	1129525	1072862	1041550	978523	1155389	1111546	304981	282172	289302	293180	284596	298436	294819	284041	262781	284596	287719	297299	294339	282589	298885	288674	1202564	1382031	1512782	855366	790843
B4A	SINE	B4	19564449	107073	0.00641026	0.00815363	0.00992014	3.03164e-05	288	287.236	41.9113	0.128083	745060	910680	800994	832495	758583	816870	797231	820892	737921	750276	767482	744311	715326	717358	710120	779667	242959	205991	211005	225067	209990	249041	247841	239919	188201	205642	216458	239393	218001	205397	226308	210106	1016902	1190909	1270307	777610	695387
B4	SINE	B4	10801213	64020	0.00549451	0.00793139	0.0102155	4.03739e-05	280	279.525	42.3339	0.167313	421880	511426	451539	469841	433199	462935	450416	463034	418841	424313	432247	418949	410015	408678	399442	440058	136392	118311	121730	128481	119592	142463	142121	136693	108224	118119	124122	136453	125320	117856	130413	120249	572130	670269	714834	441134	391769
BC1_Mm	scRNA	scRNA	554164	6758	0	0.00704887	0.0104031	0.000126548	255	236.771	78.6269	0.95645	23965	29002	26648	27430	26590	26854	28374	26949	24787	25662	26681	25351	25918	23990	25627	26585	7884	7469	7611	7987	7616	7888	8079	7537	6814	7577	7841	8046	7458	7602	8290	7992	30927	35000	38513	22944	20550
BGLII_A	LTR	ERVK	92765	292	0.00477327	0.00604527	0.00596013	0.00034879	152	152.401	42.6524	2.49604	4942	4558	4160	3662	4930	3719	4088	3533	5070	4282	4374	3893	4871	3775	4677	3525	876	823	789	779	822	863	950	946	757	857	808	1013	751	758	970	880	3053	3460	3231	2220	1831
BGLII_B2	LTR	ERVK	97719	359	0.00235849	0.00465666	0.00682112	0.000360005	165	176.123	58.3461	3.07939	4024	4284	3849	3704	4184	3807	3856	3604	4365	3951	3896	3608	4070	3562	3922	3667	952	919	954	954	902	1181	1110	1100	851	906	959	1019	1006	867	1007	900	3937	4634	4523	3140	2491
BGLII_B	LTR	ERVK	341161	960	0.00484849	0.00587963	0.00593579	0.000191577	169	170.346	48.8062	1.57521	18093	18290	16671	14804	18827	16620	16757	14589	19561	17865	17720	15289	18658	16409	18100	14871	3675	3338	3296	3441	3139	3809	3713	3682	2980	3364	3325	3814	3467	3086	3511	3199	13888	15742	14980	10017	8465
BGLII_C	LTR	ERVK	17203	74	0.00264334	0.00467149	0.00513133	0.000596505	183	182.446	43.9009	5.10338	664	836	623	624	656	685	637	586	601	722	644	640	619	589	606	568	191	143	171	130	187	176	194	181	157	162	192	187	202	158	188	177	618	680	643	391	366
BGLII	LTR	ERVK	793498	2269	0.00481928	0.00563666	0.00496274	0.000104185	86	94.5782	34.75	0.72952	59305	48613	42764	32173	57293	38947	41079	31626	53587	41072	42594	34748	63111	42215	45647	32567	6981	6725	6527	6823	6657	7689	7490	7253	5986	6552	6700	7784	6823	6594	7212	6613	24631	27751	24053	16352	13736
BGLII_Mur	LTR	ERVK	208853	611	0.00478469	0.00600059	0.00559987	0.000226547	179	180.074	35.5269	1.43726	8197	8880	7957	7447	8429	7814	7911	7199	8384	8029	7554	7015	8237	7135	7720	7156	2149	1884	1930	2090	2132	2131	2223	2039	1692	1914	1894	2180	1950	1808	2109	1963	7737	8910	8787	5691	4906
BGLII_Mus	LTR	ERVK	184286	615	0.00510204	0.00645806	0.00579358	0.00023362	106	113.148	37.463	1.51065	12115	11697	9067	8238	12019	9658	8747	8410	11951	9889	9259	8907	13141	10697	10108	8638	1722	1592	1624	1717	1615	1853	1762	1690	1465	1700	1503	1878	1657	1668	1604	1613	6097	6829	6455	4371	3709
BLACKJACK	DNA	hAT-Blackjack	217179	716	0.00355241	0.00531675	0.00679289	0.000253862	300	297.521	41.8007	1.56216	4902	6808	5049	5472	4206	4520	4669	4869	3655	4461	3831	4197	4063	3849	4075	4669	1788	2021	2015	1890	2141	1775	1787	1612	1922	2147	1945	1867	2058	2252	2066	2249	4408	5243	4978	3094	2599
C573_MM	Other	Other	521708	1738	0.00573066	0.00521475	0.00353436	8.47785e-05	180	169.799	70.9699	1.70235	4432	8706	4705	5715	3539	5376	3698	5141	2970	4898	3386	4693	3170	5394	3520	5947	1937	1951	2066	2002	1984	1913	2052	1908	1749	2053	1872	2177	1938	2062	2232	2121	3552	4644	5513	3172	2505
CAAAAAn	Simple_repeat	Simple_repeat	304305	7743	0	0.000494823	0.00387859	4.40778e-05	43	46.7227	39.6971	0.451133	10457	15239	11972	13054	11040	11119	11865	11722	9030	11201	9879	10210	10558	10468	9998	11973	3792	5131	4967	4782	5094	5084	5185	4814	4680	5303	4809	5371	5220	5798	6114	5567	14789	16942	16462	10838	9016
CAAAAn	Simple_repeat	Simple_repeat	794404	21347	0	0.000739616	0.00490632	3.35805e-05	18	26.6646	32.3354	0.221315	37650	51724	42843	45634	39371	39849	42330	43065	32577	39073	36781	38603	36393	36520	36877	43165	12972	16563	15821	14961	15937	16584	16964	16131	14923	16661	15829	17747	15576	17384	18886	17712	48821	55588	55012	34709	29698
CAAACn	Simple_repeat	Simple_repeat	118849	2703	0	0.000996535	0.00573526	0.000110314	28	31.9264	33.5102	0.644546	6583	8348	7152	7672	6862	6852	7327	7255	6047	6808	6585	6832	6556	6443	6544	7078	2015	2506	2468	2427	2439	2676	2771	2843	2345	2525	2354	2679	2328	2589	2858	2550	8713	10229	10019	6353	5766
CAAAGn	Simple_repeat	Simple_repeat	19886	354	0	0.0013033	0.00738604	0.000392564	43	48.3136	39.2629	2.0868	1270	1366	1350	1175	1220	1124	1286	1151	1116	1109	1232	1059	1158	1135	1250	1202	348	374	313	376	380	377	403	382	343	353	375	403	319	343	413	387	1142	1379	1439	882	755
CAAAn	Simple_repeat	Simple_repeat	980576	30301	0	0.000744421	0.00512542	2.94443e-05	24	29.7744	34.8477	0.200192	48887	71328	56237	63320	50728	54670	54641	59674	42206	52373	46783	53057	46364	48920	46021	59582	18955	23223	22834	22410	22985	24618	24948	24009	21775	24103	22925	25834	22586	24935	27273	25565	72422	83231	82615	52285	43876
CAAATn	Simple_repeat	Simple_repeat	5820	161	0	0.000159261	0.00202079	0.000159261	32	35.9876	38.234	3.01326	319	509	380	368	344	391	367	342	317	364	309	290	294	340	304	362	108	133	108	112	128	121	168	128	110	111	110	130	127	138	121	136	463	532	462	322	326
CAACCn	Simple_repeat	Simple_repeat	7346	116	0	0.00344264	0.0120328	0.00111722	67	74.8793	74.3177	6.90022	493	522	481	548	440	480	483	489	405	437	469	464	383	379	430	473	143	118	121	110	112	151	156	167	121	108	127	143	105	138	116	133	648	714	760	578	481
CAACGn	Simple_repeat	Simple_repeat	226	3	0.115385	0.0888457	0.0510969	0.0295008	91	150	114.529	66.1236	14	16	20	9	17	20	19	7	13	16	16	11	10	4	15	16	2	3	5	4	2	2	6	3	2	10	1	11	5	3	3	7	70	49	103	36	69
CAACTn	Simple_repeat	Simple_repeat	1871	29	0	0.000838931	0.00377175	0.000700396	47	89.4138	96.5	17.9196	141	151	128	136	112	136	100	129	114	116	101	141	111	115	97	133	30	14	25	22	32	29	35	25	26	31	27	28	23	36	32	30	140	138	116	92	52
CAAGAn	Simple_repeat	Simple_repeat	6610	112	0	0.00221695	0.00934847	0.000883347	66.5	70.625	65.1674	6.15774	327	568	318	539	371	534	396	613	337	478	387	601	342	455	386	670	111	103	91	93	113	152	131	130	97	93	109	148	84	91	97	110	506	580	428	312	292
CAAGCn	Simple_repeat	Simple_repeat	5622	60	0	0.00190347	0.00768587	0.000992242	79	106.017	103.528	13.3654	336	424	315	400	318	357	302	380	347	318	345	400	373	362	334	463	84	64	46	96	77	105	78	85	73	50	71	99	96	67	73	63	424	519	506	357	285
CAAGGn	Simple_repeat	Simple_repeat	7437	85	0	0.0062148	0.0222278	0.00241094	30	55.4706	82.352	8.93233	674	662	630	549	673	709	724	637	747	663	692	685	675	706	763	712	104	110	72	96	71	109	171	116	62	100	98	90	96	75	86	77	765	954	929	701	562
CAAGn	Simple_repeat	Simple_repeat	44130	1014	0	0.00201345	0.00912555	0.000286576	63.5	63.8294	53.1903	1.67037	3558	4077	3739	3485	3546	3463	3670	3510	3653	3544	3644	3261	3613	3448	3452	3349	808	957	988	982	913	1214	1157	1145	893	1055	979	1228	1038	962	1147	1029	3905	4668	4752	2998	2758
CAAGTn	Simple_repeat	Simple_repeat	772	7	0	0	0	0	0	51.2857	64.2384	24.2798	27	43	17	24	37	31	38	22	45	17	24	20	36	28	17	30	20	11	13	6	4	1	3	18	15	18	9	13	15	5	5	10	69	64	53	62	42
CAAn	Simple_repeat	Simple_repeat	385187	10869	0	0.00139073	0.00796538	7.64032e-05	31	44.7652	54.8056	0.525691	19178	27809	21657	24451	19010	20895	20255	22606	16362	19675	17954	20024	17620	18337	16901	22547	7327	8737	8462	8333	8807	9413	9639	9428	7981	8942	8527	9469	8268	9089	9893	9175	28431	33925	31347	20007	16516
CAATAn	Simple_repeat	Simple_repeat	8323	141	0	0.00186485	0.0104946	0.000883804	64	78.4326	74.8651	6.30477	381	563	447	485	380	421	477	452	289	411	334	360	315	306	354	451	193	134	146	96	116	102	102	85	100	114	139	93	145	122	124	127	409	446	452	244	219
CAATCn	Simple_repeat	Simple_repeat	1212	19	0	0.0184707	0.0344536	0.00790419	80	86	87.8989	20.1654	81	87	93	115	83	99	86	129	63	82	128	126	70	79	120	141	24	15	8	12	24	18	21	22	16	31	22	22	20	17	16	21	99	106	110	73	67
CAATGn	Simple_repeat	Simple_repeat	1195	14	0	0.00766572	0.0142629	0.00381193	124	155.357	104.685	27.9781	54	55	53	53	35	52	55	46	42	46	36	34	27	31	47	55	23	10	18	14	8	21	23	16	19	11	21	22	15	13	14	9	54	56	71	64	46
CAATn	Simple_repeat	Simple_repeat	56229	1585	0	0.00192323	0.00866462	0.000217638	33	46.3722	53.1107	1.33404	3358	4552	3723	3992	3412	3685	3763	3982	3018	3656	3282	3461	3107	3224	3330	3840	1319	1429	1421	1273	1498	1389	1413	1284	1323	1482	1413	1491	1327	1476	1609	1468	4601	5507	5384	3349	2919
CAATTn	Simple_repeat	Simple_repeat	1580	32	0	0.0030909	0.00916936	0.00162093	72	89.375	86.3488	15.2645	69	89	78	78	77	62	70	64	38	61	45	53	58	67	46	88	40	26	33	24	28	22	24	20	26	27	26	29	25	41	40	29	60	72	68	54	40
CACAAn	Simple_repeat	Simple_repeat	11146	190	0	0.00286129	0.00857069	0.000621783	61	80.7526	81.437	5.90806	603	786	654	797	616	667	650	719	601	608	588	712	538	594	589	711	217	157	170	238	192	217	220	183	162	159	197	212	192	154	199	188	925	1080	1103	656	539
CACACn	Simple_repeat	Simple_repeat	29640	267	0	0.00315117	0.00760881	0.000465652	87	112.397	103.03	6.30532	2142	2541	2217	2280	2150	2389	2230	2395	2376	2277	2356	2187	2137	2144	2240	2303	577	294	376	385	356	530	509	495	305	308	357	383	349	286	382	317	3257	3924	3865	2958	2589
CACAGn	Simple_repeat	Simple_repeat	53802	346	0	0.00516383	0.0154053	0.000828197	92	121.561	113.659	6.11036	6713	7527	6939	6909	6375	7565	6635	7694	6805	6525	6960	7231	6113	6534	5976	8045	1586	806	936	1093	933	1442	1459	1451	813	826	1031	1186	1010	848	1005	823	12353	17305	18762	13569	13149
CACATn	Simple_repeat	Simple_repeat	9374	98	0	0.00327783	0.0080792	0.000816123	43	85.5918	91.7319	9.26632	532	698	535	651	536	578	504	649	454	585	492	612	555	600	458	624	157	127	142	166	129	180	133	170	115	148	141	163	126	151	148	100	916	1111	842	706	574
CACCATn	Simple_repeat	Simple_repeat	90525	1005	0	0.00660927	0.0118615	0.000374159	179	182.7	82.7216	2.60937	4080	5026	3985	4718	3997	4716	4030	4895	3856	3967	3793	3926	3671	3918	3341	4418	1638	1181	1370	1388	1331	1796	1829	1785	1277	1354	1449	1575	1416	1431	1618	1406	8788	10578	9438	7064	5948
CACCCn	Simple_repeat	Simple_repeat	50912	1141	0	0.00496018	0.0126496	0.000374485	40	66.5329	79.4601	2.35237	6168	6234	5797	5350	6780	6790	6309	5964	7393	7105	6780	6240	6820	7052	6519	5799	1048	628	799	869	802	972	1011	1015	650	811	759	937	758	729	842	748	6023	6805	6930	5659	4378
CACCGn	Simple_repeat	Simple_repeat	439	8	0.174243	0.155803	0.063784	0.0225511	31.5	46	46.2478	16.3511	176	122	133	89	216	155	133	110	220	191	190	158	206	135	173	124	4	4	2	12	4	8	7	8	6	8	9	4	4	11	12	7	72	92	92	59	60
CACCTn	Simple_repeat	Simple_repeat	9951	84	0	0.00643774	0.0143824	0.00156925	141.5	138.44	105.507	11.5118	942	885	855	860	936	884	969	981	1123	955	1070	976	1079	939	1052	993	169	99	118	136	146	169	158	130	101	128	105	153	139	129	145	111	1009	1245	1177	984	822
CACGAn	Simple_repeat	Simple_repeat	63	2	0.12963	0.12963	0.0261891	0.0185185	48	48	15.5563	11	9	11	7	9	10	9	10	9	10	6	8	18	10	13	4	11	1	4	2	2	7	0	0	4	0	5	1	2	4	2	2	3	18	17	22	3	8
CACGCn	Simple_repeat	Simple_repeat	612	11	0.142857	0.147199	0.0300473	0.00905962	93	94.3636	63.1463	19.0393	187	114	145	108	212	153	152	131	271	173	186	141	210	196	138	96	17	9	9	8	16	15	16	10	8	6	8	9	6	10	13	9	276	210	272	236	167
CACGn	Simple_repeat	Simple_repeat	48290	883	0.147059	0.14683	0.0604237	0.00203342	135	152.736	93.2923	3.13954	6573	5913	7113	5868	7088	6434	7376	6362	8047	6663	8476	7224	6157	6067	7777	6289	1247	813	903	945	811	1154	1206	1095	759	786	835	1039	983	855	946	872	6555	7909	8655	5952	5064
CACGTn	Simple_repeat	Simple_repeat	301	6	0.104336	0.104518	0.0339333	0.0138532	164	145.667	41.3457	16.8793	21	11	17	19	10	23	20	32	25	7	27	21	15	11	15	23	5	6	5	7	3	9	3	8	8	6	7	4	16	2	4	5	42	41	76	32	30
CACTAn	Simple_repeat	Simple_repeat	7265	91	0	0.00261955	0.00762433	0.000799247	143	116.033	92.6688	9.71433	485	591	518	510	470	603	537	592	460	487	496	577	454	429	407	587	155	75	78	94	76	59	106	106	59	74	83	91	76	61	59	54	491	578	639	384	330
CACTCn	Simple_repeat	Simple_repeat	7721	65	0	0.00277587	0.00712991	0.000884356	189	149.538	116.053	14.3946	465	580	445	498	464	526	510	499	517	488	438	482	522	484	384	545	124	79	72	82	76	112	132	133	74	89	104	89	86	73	51	88	804	940	977	819	675
CACTGn	Simple_repeat	Simple_repeat	13529	120	0	0.0067532	0.0166123	0.00151649	135.5	136.45	97.5054	8.90099	1090	1093	1053	1085	1085	1229	1072	1167	1186	1110	1285	1170	985	1093	1159	1183	219	154	125	157	167	176	215	224	135	124	142	132	157	119	151	123	2173	2625	3278	2174	2106
CACTTn	Simple_repeat	Simple_repeat	352	5	0	0.00355323	0.00506417	0.00226477	30	54.2	55.4545	24.8	13	20	25	17	20	11	20	18	6	26	4	15	8	14	14	15	18	7	1	2	10	6	8	5	1	8	6	4	5	5	10	6	19	18	34	9	13
CAGAAn	Simple_repeat	Simple_repeat	10935	176	0	0.0021421	0.0111296	0.000838923	45	70.5852	80.8608	6.09511	1030	1052	994	819	1058	1044	987	883	1055	1061	995	867	1212	940	1084	963	181	152	160	159	135	162	183	175	163	155	152	166	149	136	152	143	763	921	955	574	535
CAGACn	Simple_repeat	Simple_repeat	5596	57	0	0.00294743	0.00840891	0.00111379	62	99.8421	98.8711	13.0958	677	783	930	818	606	725	1023	962	724	668	1282	1132	622	743	1056	1085	143	85	108	117	125	118	153	149	102	110	115	140	109	93	128	104	758	1017	1045	795	642
CAGAGAn	Simple_repeat	Simple_repeat	464892	6165	0	0.00226661	0.00804898	0.000102512	108	123.738	82.6669	1.05285	26268	33429	29378	30329	25114	29572	29411	31546	24892	26588	30293	30715	24256	26646	29417	33459	7149	5645	5697	6026	5738	7297	7445	7225	4895	5372	6193	6841	6060	5437	6165	5508	31779	39703	35269	26435	22105
CAGAGn	Simple_repeat	Simple_repeat	46467	332	0	0.00379521	0.0129302	0.000709635	0	48.0482	83.1762	4.56489	4247	4536	4886	5164	3896	4794	5061	6135	4613	4486	5926	6081	3719	4379	5498	7212	828	544	568	615	563	804	734	856	500	443	627	732	626	541	615	502	7531	9677	9527	7057	6183
CAGAn	Simple_repeat	Simple_repeat	394777	7620	0	0.00240343	0.00890484	0.000102011	77	84.4269	69.2032	0.792772	24483	31657	26751	28143	25436	27654	26796	28520	23238	24783	25076	25028	23591	24659	23210	27666	8123	6486	7103	7235	6955	8483	8704	8334	6117	6585	7169	8093	7132	6637	7440	6750	34491	41634	39559	26141	22297
CAGATn	Simple_repeat	Simple_repeat	841	10	0	0	0	0	37	57	77.696	24.5696	35	55	35	42	32	34	40	30	43	39	36	50	45	54	38	45	9	12	4	13	5	6	11	8	7	12	9	16	7	10	7	16	41	67	41	25	37
CAGCCn	Simple_repeat	Simple_repeat	17401	224	0	0.00632516	0.0175927	0.00117546	59.5	98.558	105.378	7.04084	2857	2748	2403	2025	2920	2900	2480	2143	3313	2567	2798	2350	3357	3352	2693	2287	307	183	257	251	205	317	278	269	199	231	262	269	245	205	231	176	2066	2679	2887	2014	1710
CAGCGn	Simple_repeat	Simple_repeat	628	12	0.153529	0.128187	0.064408	0.018593	55	103.75	107.775	31.112	400	291	395	247	498	315	424	252	642	416	607	403	526	433	611	319	14	10	6	14	11	17	9	14	6	7	14	13	12	13	5	6	110	148	145	108	75
CAGCn	Simple_repeat	Simple_repeat	15232	260	0	0.00403742	0.0147161	0.000912653	42	73.3154	86.3653	5.35615	2429	2234	2508	2185	2568	2357	2393	2399	2865	2107	2752	2472	2686	2306	2841	2360	238	252	323	358	276	357	355	381	258	301	279	348	300	258	300	276	2020	2459	2553	1830	1504
CAGCTn	Simple_repeat	Simple_repeat	9882	79	0	0.00591145	0.0156637	0.0017623	133	136.873	115.818	13.0305	1506	1365	1217	1199	1433	1448	1236	1192	1741	1225	1333	1149	1670	1423	1322	1238	196	116	133	115	88	167	178	154	112	115	134	132	126	93	125	124	1213	1578	1554	1173	912
CAGGAn	Simple_repeat	Simple_repeat	10626	140	0	0.00158397	0.00588367	0.000497261	61	88.5929	91.5044	7.73353	720	882	735	783	741	843	694	784	769	775	728	706	720	818	686	836	199	106	117	161	129	188	180	151	120	111	155	190	148	129	126	118	1127	1364	1400	1014	855
CAGGCn	Simple_repeat	Simple_repeat	4635	78	0	0.00499283	0.016274	0.00184266	34.5	75.7821	102.866	11.6473	614	671	734	646	654	668	783	670	805	663	930	731	753	749	827	682	107	87	82	98	62	104	107	125	59	93	82	120	82	69	85	71	920	1003	1156	897	728
CAGGGn	Simple_repeat	Simple_repeat	8342	192	0	0.00753808	0.0189061	0.00136443	38	42.0521	42.3867	3.059	1650	1404	1519	1090	1894	1514	1629	1283	2160	1572	1859	1428	1917	1879	1720	1363	195	157	149	161	147	232	192	205	127	155	175	168	155	149	161	115	1504	1741	1983	1432	1190
CAGGn	Simple_repeat	Simple_repeat	96805	1318	0	0.0046734	0.0144421	0.000397807	52.5	76.2261	81.8129	2.25353	11902	12059	15076	12934	12033	13727	16507	14362	14520	13318	20102	18020	11143	12529	18705	15702	1595	1549	1680	1849	1593	2303	2287	2450	1374	1547	1795	2026	1748	1494	1933	1586	14391	17955	18129	12712	10775
CAGGTn	Simple_repeat	Simple_repeat	728	19	0	0	0	0	0	33.0526	42.3287	9.71087	53	76	61	72	57	76	78	70	89	83	62	69	52	74	59	84	23	18	9	8	11	15	19	20	17	15	14	17	14	8	18	10	169	202	256	138	138
CAGn	Simple_repeat	Simple_repeat	131823	2236	0	0.0090931	0.0225147	0.000476135	69	88.7174	88.5244	1.87209	17420	15836	18086	13780	18962	16753	18963	15245	23068	17157	21822	16974	20741	17449	20494	15874	2398	2316	2617	2793	2428	3262	3316	3206	2158	2382	2668	2906	2559	2336	2671	2474	20445	24062	26321	16955	15914
CAGTAn	Simple_repeat	Simple_repeat	15653	115	0	0.00404894	0.0102462	0.000955463	214	193.513	109.428	10.2042	788	982	811	858	836	884	892	928	794	757	807	854	683	875	727	986	206	82	131	155	103	139	152	162	70	105	114	131	101	108	140	77	854	1051	1260	645	619
CAGTCn	Simple_repeat	Simple_repeat	2185	28	0	0.00386744	0.00731879	0.00138312	132	139.821	119.306	22.5468	165	193	186	195	154	184	165	184	155	168	144	192	135	193	133	169	33	24	21	35	33	29	32	35	8	34	26	35	25	20	21	20	204	246	296	166	138
CAGTGn	Simple_repeat	Simple_repeat	20612	138	0	0.00565754	0.0129664	0.00110378	156	148.572	90.2184	7.6799	1297	1314	1325	1241	1267	1318	1401	1365	1407	1224	1468	1352	1252	1208	1422	1427	321	167	190	204	189	234	274	241	140	164	207	227	234	162	150	152	2762	3573	4045	2674	2442
CAGTn	Simple_repeat	Simple_repeat	13787	228	0	0.00388216	0.0114426	0.000757803	51	76.4781	84.0836	5.56857	1300	1351	1488	1330	1312	1302	1386	1385	1426	1228	1471	1407	1388	1313	1541	1457	265	195	222	256	232	288	279	279	217	214	245	284	280	228	302	219	1559	1872	2034	1252	1041
CAGTTn	Simple_repeat	Simple_repeat	6228	93	0	0.00541829	0.0108882	0.00112906	136	142.226	85.6346	8.87989	425	568	395	443	376	430	390	386	360	397	358	413	353	400	371	454	101	87	74	94	84	89	80	97	68	98	99	99	64	77	99	89	352	452	422	299	238
CAn	Simple_repeat	Simple_repeat	8804814	153331	0	0.00560508	0.0166377	4.24891e-05	27	56.4819	74.2322	0.189573	523883	691253	567380	619561	525865	584531	550885	621070	482325	544508	512417	553229	495951	519651	482065	619485	198723	127803	131536	136035	132254	165401	170897	163985	115149	126458	136379	151704	136796	123851	139287	124895	697543	849657	791313	546425	453447
CATAAn	Simple_repeat	Simple_repeat	6500	94	0	0.00260307	0.00877144	0.000904705	53	71.5957	74.5063	7.68474	242	348	266	318	257	269	257	286	164	269	181	276	226	220	204	284	113	94	86	108	91	113	80	66	67	93	87	82	86	106	101	79	284	349	271	171	145
CATACn	Simple_repeat	Simple_repeat	6883	74	0	0.00133104	0.00543274	0.000631543	86	104.176	95.902	11.1484	414	553	406	472	367	468	403	434	366	417	356	413	351	428	362	400	145	68	101	81	90	88	74	118	79	65	80	75	78	81	94	79	608	679	635	419	370
CATAGn	Simple_repeat	Simple_repeat	4690	51	0	0.00346814	0.0102319	0.00143275	13	59.549	77.6743	10.8766	245	353	270	341	268	311	260	335	273	292	244	224	245	307	228	290	97	45	54	50	60	55	75	72	50	54	54	63	49	44	53	44	293	341	489	278	252
CATAn	Simple_repeat	Simple_repeat	676376	10410	0	0.00288487	0.00846805	8.29962e-05	103	119.055	91.3621	0.895448	28006	42348	31624	36079	28398	31816	30750	35769	22026	29916	23720	27650	25856	26413	24944	33264	13323	9366	9608	9052	9485	8792	9034	8188	8357	9261	9352	9844	9731	9379	9188	9168	33860	38559	37631	21412	19342
CATATAn	Simple_repeat	Simple_repeat	395041	5060	0	0.00239606	0.00722896	0.000101625	192	182.981	84.5198	1.18818	10955	20401	13438	15792	11409	12110	12997	15818	7763	12816	8555	10576	9775	10186	10540	14801	5827	4730	4747	4195	4897	3569	3510	3178	4331	4717	4369	4222	4717	4532	4211	4472	12110	13674	12795	7198	6696
CATATn	Simple_repeat	Simple_repeat	19483	262	0	0.00200393	0.00700432	0.000432728	70.5	87.6679	80.3798	4.96588	470	925	567	721	471	529	544	661	300	517	331	481	369	452	419	627	236	235	198	216	188	167	181	154	219	246	224	211	236	240	198	241	552	643	536	314	250
CATCCn	Simple_repeat	Simple_repeat	11775	107	0	0.0024383	0.00764405	0.000738978	140	145.449	108.089	10.4494	562	664	640	676	546	571	592	732	519	540	583	623	588	578	566	642	153	109	111	127	110	163	200	198	121	117	161	170	162	107	138	115	805	1040	984	843	611
CATCGn	Simple_repeat	Simple_repeat	117	3	0.166667	0.163026	0.0250408	0.0144573	0	45.3333	78.5196	45.3333	30	36	45	37	38	47	48	42	59	44	34	48	58	53	45	40	1	4	4	2	3	5	1	10	0	1	6	5	3	3	7	0	27	29	24	17	22
CATCTn	Simple_repeat	Simple_repeat	2391	39	0	0.00356836	0.0101923	0.00163207	13	34.9487	56.9972	9.12686	135	163	102	135	106	124	138	143	110	131	112	142	123	109	117	151	42	34	21	31	51	49	50	34	34	22	26	43	32	30	46	22	150	177	189	122	99
CATGCn	Simple_repeat	Simple_repeat	4943	43	0	0.0127396	0.0268067	0.00408799	150	156.674	122.316	18.653	229	233	226	191	221	258	176	223	204	230	210	166	186	249	189	207	70	63	48	68	57	76	85	76	47	75	68	65	52	50	47	57	528	625	741	495	443
CATGn	Simple_repeat	Simple_repeat	73418	1252	0	0.0135834	0.0201115	0.000568383	191	186.9	97.6069	2.75853	3930	4991	4322	4606	4184	4629	4381	4539	3946	3944	4037	3960	3833	3731	3636	4371	1688	1241	1298	1284	1166	1432	1319	1359	1051	1214	1280	1295	1275	1200	1405	1223	6810	8057	8595	5552	4827
CATGTn	Simple_repeat	Simple_repeat	3508	38	0	0.00470923	0.00966085	0.0015672	109.5	138.895	121.35	19.6855	187	254	219	195	197	220	178	169	244	174	199	168	195	213	199	206	52	35	58	41	46	56	59	45	45	44	54	52	30	55	66	35	234	313	244	164	133
CATn	Simple_repeat	Simple_repeat	139180	2584	0	0.0141742	0.0255979	0.000503568	119	121.132	83.8187	1.6489	6270	8696	6598	7603	6090	6954	6348	7025	5367	6181	5607	6014	5610	5735	5282	6711	2668	2482	2486	2509	2467	2969	2925	2895	2265	2469	2425	2799	2555	2547	2723	2646	10820	13071	11537	8115	6717
CATTAn	Simple_repeat	Simple_repeat	2341	43	0	0.00129889	0.00619946	0.000945408	67	81.6977	73.8649	11.2643	59	105	82	106	78	75	93	98	46	85	77	92	80	55	93	98	54	26	42	26	39	41	26	31	41	31	32	34	37	46	45	19	114	130	146	74	56
CATTCn	Satellite	Satellite	3164	31	0	0.00279194	0.0103361	0.00185642	112	112.419	98.9662	17.7749	238	278	226	223	248	243	198	213	238	221	220	239	249	248	243	228	54	34	45	40	23	46	35	53	43	30	31	33	40	27	43	30	191	215	239	162	147
CATTCn	Simple_repeat	Simple_repeat	3164	31	0	0.00279194	0.0103361	0.00185642	112	112.419	98.9662	17.7749	238	278	226	223	248	243	198	213	238	221	220	239	249	248	243	228	54	34	45	40	23	46	35	53	43	30	31	33	40	27	43	30	191	215	239	162	147
CATTGn	Simple_repeat	Simple_repeat	954	16	0	0.00244351	0.00690707	0.00172677	81	80.5625	70.7125	17.6781	60	122	93	82	93	64	106	79	103	62	106	72	106	76	102	75	19	12	19	12	19	24	16	15	11	15	15	5	13	13	11	16	57	85	83	65	46
CATTTn	Simple_repeat	Simple_repeat	4483	109	0	0.00187459	0.00728414	0.000697694	42	67.0826	81.1824	7.77586	207	311	204	263	181	198	191	212	148	178	178	182	149	152	182	216	56	121	68	84	90	97	68	78	77	97	83	87	93	83	108	115	231	253	210	168	134
CCAAn	Simple_repeat	Simple_repeat	137327	2571	0	0.00152398	0.00644734	0.000127154	58	64.802	58.2646	1.14909	6590	8735	7285	8308	6913	7127	7522	7550	6234	6880	6939	6933	6420	6159	6527	7379	2192	2609	2762	2672	2722	3229	3291	3286	2463	2673	2634	3047	2618	2745	3061	2911	10838	12547	13103	8322	7178
CCAn	Simple_repeat	Simple_repeat	230858	3951	0	0.00581014	0.015968	0.000254038	56	81.9471	87.8832	1.39814	17557	20462	16604	17518	18147	19263	16729	17980	19511	18382	16820	16610	18085	17981	15383	17360	4438	3996	4110	4424	4028	5568	5571	5666	3508	3914	4135	4780	4136	4102	4674	3894	25868	30969	29173	23463	19321
CCCAn	Simple_repeat	Simple_repeat	69729	1172	0	0.00331648	0.00996489	0.000291077	69	114.192	114.983	3.35868	4380	4994	4365	4557	4507	4925	4432	4866	4614	4615	4331	4227	4378	4688	4177	4562	1179	880	960	1019	916	1357	1316	1342	792	931	897	1166	987	928	1037	910	6663	8027	8197	6554	5157
CCCCAAn	Simple_repeat	Simple_repeat	5825	88	0	0.00508997	0.014684	0.00156532	156.5	162.648	111.932	11.932	693	638	606	559	792	606	681	574	900	687	840	564	877	703	770	553	114	69	81	103	75	119	94	108	67	72	79	85	103	70	96	94	533	665	651	515	418
CCCCAGn	Simple_repeat	Simple_repeat	44261	498	0	0.0144418	0.0315413	0.0014134	121	129.45	108.444	4.85951	8581	6809	7843	6169	9227	8281	8620	7006	11327	8412	10685	8613	10619	9312	10261	7568	670	462	624	647	519	759	748	685	452	549	654	647	535	430	555	534	5614	6638	7260	5244	4436
CCCCCAn	Simple_repeat	Simple_repeat	64285	2119	0	0.00483487	0.0135253	0.00029382	33	35.8329	38.8189	0.843291	9546	9677	9317	8067	10723	10119	10171	8728	11797	10821	10886	9357	11606	11268	10574	8882	1345	994	1094	1088	1148	1316	1309	1224	968	1047	1099	1215	1067	1098	1291	1041	7911	8950	9206	6733	5350
CCCCCGn	Simple_repeat	Simple_repeat	5283	152	0.129734	0.127402	0.042315	0.0034322	66	63.3553	45.9266	3.72514	3000	2333	2814	2013	3116	2573	3185	2272	4110	3180	4082	3004	3941	3565	3878	2512	90	88	69	92	107	132	98	90	87	73	92	97	111	79	94	77	911	1035	945	787	541
CCCCCTn	Simple_repeat	Simple_repeat	48761	979	0	0.00276515	0.0104935	0.000335375	77	74.5843	39.9004	1.27522	4665	4835	4674	4166	4848	4617	4703	4196	5475	4962	5152	4600	5412	5089	5212	4271	595	505	516	626	558	707	782	672	512	524	560	707	652	504	661	597	3573	4056	3680	2994	2284
CCCCGn	Simple_repeat	Simple_repeat	33341	535	0.151515	0.148696	0.0449271	0.00194237	108	126.389	93.553	4.04465	41748	29392	38234	26005	45322	35125	40800	29980	57945	40954	53910	39345	53824	45639	53335	30894	563	480	541	632	524	781	725	693	427	495	539	612	618	491	579	475	7504	8130	6984	6354	4004
CCCGAAn	Simple_repeat	Simple_repeat	825	8	0.140176	0.11511	0.0517943	0.0183121	226.5	236.875	84.369	29.8289	196	141	233	145	216	176	262	171	360	243	349	260	288	202	329	176	6	8	15	5	14	9	10	13	4	9	15	7	15	13	11	10	99	142	141	118	85
CCCGAn	Simple_repeat	Simple_repeat	87	3	0.176471	0.174399	0.0172068	0.00993436	0	29.3333	50.8068	29.3333	184	137	195	126	186	150	218	163	249	176	263	235	209	220	233	174	4	5	4	2	5	8	2	4	1	6	1	0	3	2	2	1	52	47	56	58	33
CCCGGn	Simple_repeat	Simple_repeat	854	30	0.17029	0.172636	0.028931	0.00528206	42.5	51.0667	39.1363	7.14528	1242	881	1268	855	1399	1077	1560	888	2059	1257	1943	1480	1744	1464	1764	1024	17	31	29	37	27	21	40	35	8	28	25	20	22	24	21	26	252	302	320	247	168
CCCGn	Simple_repeat	Simple_repeat	4106	120	0.216803	0.21239	0.0432753	0.00395048	70	64.8167	45.8272	4.18343	4424	3113	4466	3064	4847	3723	5088	3239	6516	4654	6330	4748	5957	4971	6114	3483	82	76	74	108	86	111	105	139	66	79	77	108	100	70	113	101	1113	1179	1183	976	661
CCCTAAn	Simple_repeat	Simple_repeat	62771	701	0	0.00231429	0.00677592	0.000255923	127	129.434	96.3482	3.63902	6551	10327	8300	9388	7078	8576	8909	10624	6603	9364	7614	10625	6602	8065	8820	12264	2109	1222	2045	2099	1311	2039	3351	3598	1123	1247	2503	2524	1597	1052	1851	1704	8936	10268	9429	8737	7564
CCCTAGn	Simple_repeat	Simple_repeat	5724	54	0	0.00250183	0.00633725	0.00086239	179	176.63	104.917	14.2775	424	540	417	465	484	532	477	470	507	408	507	472	491	529	473	471	91	37	68	57	62	89	74	73	63	68	70	106	58	47	49	58	587	708	847	516	475
CCCTAn	Simple_repeat	Simple_repeat	628	13	0	0.00648901	0.0165648	0.00459426	42	59.9231	51.3086	14.2305	44	55	42	54	51	67	49	56	49	50	50	66	56	61	54	41	21	5	8	7	3	17	11	14	15	5	7	16	3	7	14	11	65	54	79	55	41
CCCTGn	Simple_repeat	Simple_repeat	9349	215	0	0.00439724	0.0131888	0.000899472	39	42.6558	42.0218	2.86587	1807	1618	1731	1332	1984	1825	1897	1384	2399	1775	2073	1685	2167	2000	1873	1476	271	141	181	186	150	211	186	215	125	139	144	202	173	115	168	154	1924	2286	2555	1833	1488
CCGAAn	Simple_repeat	Simple_repeat	226	7	0.15	0.141167	0.0439787	0.0166224	79	69.5714	40.4551	15.2906	59	59	92	70	89	62	102	88	109	95	104	107	91	90	102	81	4	13	4	11	5	6	8	8	22	3	3	12	2	2	4	7	68	81	82	54	48
CCGAGn	Simple_repeat	Simple_repeat	966	16	0.174243	0.164676	0.0403619	0.0100905	97.5	101.813	97.6622	24.4155	1301	891	1169	777	1317	1015	1248	832	1891	1192	1673	1060	1872	1377	1663	932	15	24	11	30	21	28	26	33	21	22	13	25	20	14	34	25	638	557	523	466	277
CCGCGn	Simple_repeat	Simple_repeat	6837	73	0.234783	0.247467	0.0495634	0.00580096	196	174.836	74.058	8.66783	6433	4422	6708	4422	7134	5527	7391	4789	9970	6644	9624	7271	8594	7107	8778	5044	98	95	98	138	124	148	139	157	88	94	123	133	136	113	138	88	672	910	1257	781	555
CCGGAn	Simple_repeat	Simple_repeat	241	3	0.111111	0.130948	0.0395321	0.0228239	111	125.667	103.78	59.9175	69	73	87	59	85	68	149	80	146	95	138	97	132	103	126	78	2	2	0	5	0	10	10	4	3	5	9	0	6	0	4	2	70	85	81	68	56
CCGGGn	Simple_repeat	Simple_repeat	1042	35	0.178571	0.171428	0.0391231	0.00661302	53	52.0857	44.6017	7.53907	1490	984	1613	975	1725	1293	1895	1141	2391	1645	2508	1807	2107	1740	2224	1253	20	33	37	47	23	40	60	49	26	22	25	38	34	31	36	27	323	393	475	335	252
CCGGn	Simple_repeat	Simple_repeat	371	8	0.202941	0.19977	0.0183256	0.00647907	123.5	116.5	60.9356	21.544	278	235	289	197	341	252	309	188	420	317	449	348	445	364	340	210	5	7	6	10	9	12	17	11	9	9	8	8	5	10	3	8	88	105	105	77	61
CCGn	Simple_repeat	Simple_repeat	52214	889	0.21875	0.220522	0.0588197	0.00197275	143	143.745	88.3772	2.96408	52040	36200	54180	35444	58903	44833	60931	39427	80015	54817	78864	59233	72579	58612	72491	42956	757	944	1111	1224	1028	1497	1422	1496	906	1018	1022	1147	1003	998	1182	898	14016	15351	15255	12144	7725
CCGTAn	Simple_repeat	Simple_repeat	189	2	0.107143	0.107143	0.0505075	0.0357142	205.5	205.5	48.7904	34.5	9	18	25	12	11	10	9	13	5	11	13	15	6	8	20	16	2	0	0	2	0	0	0	1	5	3	4	3	0	2	1	2	4	8	15	9	13
CCTAAn	Simple_repeat	Simple_repeat	2234	18	0	0.0023198	0.00612326	0.00144327	47.5	93.5556	117.492	27.693	70	106	64	99	76	88	71	85	85	98	81	85	73	84	78	90	28	38	22	26	27	30	34	36	22	14	17	37	22	18	16	30	176	182	166	124	137
CCTAGn	Simple_repeat	Simple_repeat	2657	29	0	0.00130525	0.00403859	0.000749948	81	116.207	109.165	20.2714	215	230	214	218	203	284	207	282	258	237	256	251	213	241	257	213	45	17	29	35	21	47	37	44	22	26	40	41	31	20	24	31	243	295	262	212	171
CCTAn	Simple_repeat	Simple_repeat	26512	411	0	0.00102716	0.00471863	0.000232753	87	99.236	87.8227	4.33198	1777	2292	1843	1990	1624	1845	1817	2067	1588	1651	1516	1687	1559	1517	1660	1929	653	528	515	587	527	704	656	702	493	582	625	692	652	532	671	510	2490	3006	2683	1833	1465
CCTATn	Simple_repeat	Simple_repeat	2932	42	0	0	0	0	42	59.4762	67.3706	10.3955	166	261	150	160	136	157	155	185	138	183	138	188	134	184	152	191	50	27	51	44	27	33	31	28	26	34	43	56	21	30	33	33	165	202	180	160	106
CCTCGn	Simple_repeat	Simple_repeat	2864	32	0.123106	0.122538	0.0601039	0.010625	88	99.25	83.0017	14.6728	538	445	580	438	593	506	637	490	763	624	766	633	604	608	766	536	30	40	26	70	41	50	64	59	33	32	55	62	48	36	37	38	403	469	477	332	315
CCTGn	Simple_repeat	Simple_repeat	102200	1377	0	0.00386145	0.0132768	0.000357788	57	78.3442	84.9689	2.28978	12565	12468	16127	12959	13152	14059	17475	14622	15451	13922	21791	18010	11764	13297	20261	15872	1601	1456	1578	1971	1590	2395	2284	2406	1440	1605	1818	2013	1767	1513	1855	1631	14312	18000	18101	12698	10971
CCTTGn	Simple_repeat	Simple_repeat	6075	73	0	0.00261955	0.0107953	0.00126349	40	64.9589	73.7706	8.63419	347	390	376	380	296	417	317	402	323	333	299	419	260	328	297	396	76	78	40	69	61	97	108	82	46	66	68	105	71	80	80	62	629	757	747	580	497
CENSAT_MC	Satellite	centr	225	4	0	0.00454545	0.0090909	0.00454545	166.5	164.5	45.9021	22.951	39	45	37	36	40	27	31	45	28	43	28	25	24	32	27	32	11	23	10	16	12	21	19	20	14	7	14	17	14	13	19	11	11	28	24	12	11
CGAAAn	Simple_repeat	Simple_repeat	1495	35	0.130435	0.121753	0.0271554	0.0045901	70	69.1143	29.4267	4.97401	284	305	512	417	366	355	615	384	381	366	563	475	303	323	484	406	91	108	103	140	92	148	169	176	84	110	92	170	113	135	180	143	639	761	741	396	283
CGAAGn	Simple_repeat	Simple_repeat	458	4	0.107276	0.0931839	0.0540397	0.0270199	128.5	130.25	94.3835	47.1918	19	19	20	16	30	20	19	20	37	9	26	26	33	24	29	20	6	0	2	7	2	1	6	4	4	1	0	7	2	3	6	0	21	33	29	21	26
CGAAn	Simple_repeat	Simple_repeat	1880	45	0.137931	0.151154	0.0589414	0.00878647	105	107.178	66.2126	9.87039	188	133	194	180	171	158	208	190	200	162	270	172	178	133	196	149	28	34	50	40	41	47	51	59	35	29	55	48	47	38	42	33	234	226	263	150	111
CGAATn	Simple_repeat	Simple_repeat	34	1	0.117647	0.117647	NA	NA	88	88	NA	NA	0	2	0	2	3	1	0	5	1	1	1	2	0	0	2	1	0	1	0	0	0	0	0	0	0	0	0	1	0	0	0	0	2	2	2	1	0
CGAGAn	Simple_repeat	Simple_repeat	980	16	0.119799	0.123364	0.0389488	0.0097372	72	72.125	44.4595	11.1149	41	56	37	31	41	65	28	36	39	41	34	29	31	34	37	54	16	11	10	14	4	20	19	18	18	18	10	20	15	10	16	19	70	104	71	53	45
CGAGGn	Simple_repeat	Simple_repeat	2132	32	0.136646	0.133153	0.0718646	0.012704	72	72.5312	74.1272	13.104	730	617	701	572	779	657	753	617	1024	816	897	781	960	800	881	761	75	46	58	54	42	72	78	83	39	46	50	53	61	51	66	37	498	761	755	430	429
CGAGn	Simple_repeat	Simple_repeat	3931	101	0.185185	0.180436	0.0559412	0.00556635	83	91.6733	72.8022	7.24409	2596	1810	2565	1660	2935	2195	3029	1904	3997	2717	3724	2915	3578	2813	3571	2040	101	75	92	96	73	112	132	143	83	69	92	111	96	101	130	84	929	1053	977	777	583
CGAGTn	Simple_repeat	Simple_repeat	66	2	0.136533	0.136533	0.00197707	0.001398	17.5	17.5	24.7487	17.5	0	1	1	2	1	1	2	5	0	3	1	2	1	0	1	1	2	0	0	1	2	5	1	1	1	0	0	0	0	0	0	0	3	2	1	1	0
CGAn	Simple_repeat	Simple_repeat	5716	122	0.181818	0.193124	0.0770003	0.00697128	141	138.533	88.8119	8.04065	505	536	562	483	521	508	577	451	662	514	626	547	650	532	529	459	102	118	110	129	115	126	140	142	117	88	110	144	105	97	130	142	635	782	767	557	430
CGATAn	Simple_repeat	Simple_repeat	287	6	0.143039	0.131269	0.0293098	0.0119657	42	56.3333	27.2446	11.1225	14	30	23	20	20	26	19	14	12	13	13	19	9	14	22	19	8	4	4	2	4	6	5	3	14	2	1	8	9	9	3	1	12	28	21	16	8
CGATGn	Simple_repeat	Simple_repeat	344	5	0.142857	0.131224	0.0514748	0.0230202	101	128.8	77.8987	34.8373	17	25	23	11	12	22	30	17	11	14	22	20	16	20	17	18	3	2	4	4	4	5	7	5	7	4	8	5	6	0	8	6	24	42	40	28	28
CGATn	Simple_repeat	Simple_repeat	447	15	0.173913	0.166856	0.0685359	0.0176959	69	75.8	69.9808	18.069	28	37	63	61	51	47	60	37	45	40	69	44	47	48	49	52	19	30	15	19	16	17	10	10	11	12	14	11	8	13	19	13	82	134	126	66	82
CGCGGn	Simple_repeat	Simple_repeat	5758	67	0.237288	0.253271	0.0534486	0.00652979	176	162.955	75.9624	9.28028	6395	4351	6418	4125	6762	5452	7060	4837	9453	6574	9266	7006	8251	7137	8485	5061	76	100	92	116	92	139	106	146	62	91	127	114	116	84	115	80	1331	1514	2589	1745	1143
CGCTGn	Simple_repeat	Simple_repeat	825	10	0.105455	0.111937	0.0847964	0.026815	95.5	150.9	114.903	36.3356	227	173	226	163	246	193	262	197	364	220	372	219	291	253	293	175	18	15	17	15	9	15	18	11	16	5	23	15	14	7	24	14	127	139	192	111	115
CGGAAn	Simple_repeat	Simple_repeat	431	5	0.0802469	0.100198	0.0433742	0.0193975	128	123	28.6356	12.8062	17	21	32	38	18	20	33	28	16	20	25	22	12	14	38	31	6	3	4	9	6	3	7	4	2	1	2	6	1	5	2	4	28	31	31	21	15
CGGAGn	Simple_repeat	Simple_repeat	1429	17	0.153846	0.153512	0.0453508	0.0109992	152	136.118	96.2119	23.3348	810	571	857	548	946	756	992	611	1379	928	1273	949	1229	890	1186	725	26	11	12	29	21	21	27	24	11	8	17	22	15	17	21	31	334	337	385	346	215
CGGAn	Simple_repeat	Simple_repeat	3579	85	0.142857	0.144383	0.0671217	0.00728038	109	116.8	82.8528	8.98665	481	489	501	466	575	541	623	537	622	562	702	609	609	565	610	569	81	75	76	62	95	114	116	113	67	72	76	81	85	81	99	76	688	858	897	603	518
CGGGAn	Simple_repeat	Simple_repeat	642	15	0.15	0.146108	0.0354856	0.00916235	40	45.2667	40.131	10.3618	88	105	106	71	109	99	129	98	123	122	166	106	119	104	118	91	22	7	8	9	12	10	10	11	10	7	7	11	12	5	10	13	111	111	119	116	76
CGGGGGn	Simple_repeat	Simple_repeat	5860	168	0.128619	0.122904	0.0455373	0.00351328	62	64.9405	44.3171	3.41914	3440	2511	3377	2317	4061	2949	3616	2620	4794	3627	4362	3153	4664	3825	4282	2617	113	68	102	89	82	125	103	117	96	85	91	88	87	93	106	97	789	942	980	639	474
CGGGGn	Simple_repeat	Simple_repeat	33751	523	0.15	0.14515	0.0463134	0.00202514	122	133.273	93.2925	4.0794	39011	27451	34814	23769	42299	33139	38034	26997	54095	37787	50212	35680	50712	43068	49367	28377	520	444	461	537	527	719	681	769	455	500	442	613	509	466	529	471	7770	8019	6722	6098	3803
CGGGn	Simple_repeat	Simple_repeat	4699	137	0.222222	0.215207	0.0410019	0.00350303	59	58.1095	44.6645	3.81595	4728	3335	4842	3023	5256	3941	5374	3432	7070	4882	6804	5036	6715	5363	6562	3652	82	76	100	101	70	107	94	135	66	88	94	100	80	95	119	108	980	1185	1315	1035	740
CGGn	Simple_repeat	Simple_repeat	49731	832	0.218391	0.216934	0.0581153	0.00201478	140.5	146.709	87.1191	3.02031	47245	32336	49592	32308	53622	40324	56257	35812	72860	49265	71507	54195	66161	52200	65480	39145	699	865	979	1138	897	1357	1275	1382	775	937	983	1143	985	903	1121	950	12667	13936	13986	11082	7552
CGGTGn	Simple_repeat	Simple_repeat	996	16	0.172223	0.15234	0.0537219	0.0134305	53.5	66.8125	82.3911	20.5978	355	231	221	206	354	273	278	206	457	328	286	222	328	295	285	210	32	15	10	16	14	16	25	14	7	21	12	17	25	12	19	9	140	214	204	134	116
CGGTn	Simple_repeat	Simple_repeat	830	19	0.164384	0.156279	0.0651614	0.014949	74	96.8947	84.9398	19.4865	139	106	119	97	144	118	127	95	170	103	145	100	136	135	150	111	23	13	16	17	17	29	33	32	19	23	21	17	7	20	20	15	155	192	237	156	121
CGn	Simple_repeat	Simple_repeat	22818	735	0.423077	0.396549	0.0882752	0.00325608	43	82.0803	94.8403	3.49824	6568	5414	6089	4612	6841	5991	6296	4849	8399	6806	7957	6298	7402	6743	7202	5039	593	431	423	435	467	623	555	563	403	408	461	497	463	437	494	400	2454	2808	3004	2172	1913
CGTAGn	Simple_repeat	Simple_repeat	38	1	0.0263158	0.0263158	NA	NA	211	211	NA	NA	5	5	3	2	6	3	1	2	4	3	3	2	2	2	1	0	0	0	0	0	2	0	0	0	0	1	0	0	5	0	0	0	0	6	4	3	2
CGTGn	Simple_repeat	Simple_repeat	54075	990	0.148148	0.145521	0.0593285	0.00188559	138.5	158.643	94.9048	3.01627	7015	6599	7840	6390	7928	7025	8296	6777	9003	7484	9483	8023	7122	6547	8787	6875	1338	854	917	1092	930	1192	1266	1340	811	866	1007	1097	978	858	1113	900	7404	8565	9461	6324	5543
CGTTGn	Simple_repeat	Simple_repeat	359	3	0.128492	0.146056	0.0476544	0.0275133	90	136.667	165.025	95.2774	34	41	88	52	80	54	86	73	69	67	128	88	53	44	113	73	2	4	4	4	6	2	3	11	2	2	5	5	2	2	4	6	122	115	119	96	66
Chap1_Mam	DNA	hAT-Charlie	23069	153	0.00645161	0.00853632	0.00910539	0.000736127	309	300.784	46.4186	3.75272	842	1099	837	973	833	886	781	928	697	775	728	772	707	764	719	896	286	260	255	293	287	252	286	265	212	256	279	311	281	276	270	284	883	1071	1062	643	491
Charlie10a	DNA	hAT-Charlie	8580	61	0.00613497	0.00815412	0.00915543	0.00117223	308	301.508	49.3989	6.32488	308	394	343	369	340	377	324	380	296	342	341	354	294	315	300	373	132	86	76	117	136	119	105	84	85	94	86	119	92	94	103	92	382	380	446	240	230
Charlie10b	DNA	hAT-Charlie	6230	48	0.00530687	0.0073587	0.00794207	0.00114634	292.5	284.417	57.413	8.28685	289	317	275	355	292	285	320	257	260	269	281	249	248	306	288	296	83	75	70	76	88	97	64	63	86	54	65	110	66	57	68	60	267	349	352	207	192
Charlie10	DNA	hAT-Charlie	77040	371	0.00423729	0.00612947	0.00790921	0.000410626	294	288.919	45.4017	2.35714	1961	2797	2044	2184	1911	2056	1966	2164	1636	1828	1663	1881	1797	1735	1723	2048	776	788	731	776	735	725	807	659	701	775	715	768	786	840	732	850	1913	2447	2316	1466	1154
Charlie11	DNA	hAT-Charlie	10736	52	0.0029113	0.00629822	0.00863413	0.00119734	275.5	270.442	58.4232	8.10184	341	491	405	369	347	367	301	359	275	310	289	309	315	303	324	349	129	108	107	126	139	104	107	126	144	101	118	100	105	128	107	123	363	405	370	227	224
Charlie12	DNA	hAT-Charlie	177737	902	0.00337879	0.00688778	0.00962908	0.000320613	279	275.619	48.5407	1.61623	4828	6498	5280	5831	4758	5064	5133	5280	4322	4816	4487	4757	4461	4373	4342	5148	1883	1885	1908	1931	1804	1926	1879	1804	1723	1948	1833	2030	1940	1923	2087	1800	5470	6201	6541	3972	3330
Charlie13a	DNA	hAT-Charlie	43679	184	0.00575541	0.00759589	0.00845151	0.000623053	298	290.467	46.8553	3.45422	1576	1750	1749	1602	1543	1501	1685	1558	1449	1382	1714	1477	1422	1359	1674	1483	425	391	426	435	411	461	480	389	372	440	477	513	436	407	453	436	1335	1535	1475	999	776
Charlie13b	DNA	hAT-Charlie	23450	114	0.00519569	0.00748148	0.00797036	0.000746492	306	300.544	43.4733	4.07165	899	1074	880	882	853	832	838	850	739	804	750	764	819	762	772	838	250	222	234	223	236	249	254	210	220	264	228	308	265	253	292	271	785	991	964	604	504
Charlie14a	DNA	hAT-Charlie	12506	72	0.00424645	0.00710707	0.00885804	0.00104393	282	280.431	52.3904	6.17427	255	392	326	352	270	286	315	341	272	304	290	270	229	277	239	287	98	155	136	110	122	130	110	88	112	141	108	140	171	128	110	121	332	338	390	240	150
Charlie15a	DNA	hAT-Charlie	27050	217	0.00469484	0.00652595	0.00873804	0.000593177	307	303.41	50.0356	3.39664	1178	1302	1223	1277	1162	1296	1247	1246	1098	1076	1150	1099	1079	1067	1105	1131	325	352	329	303	345	353	296	345	276	367	296	383	318	382	369	325	1228	1346	1511	943	837
Charlie15b	DNA	hAT-Charlie	54118	272	0.0047733	0.00653792	0.00794512	0.000481744	304	297.787	43.475	2.63606	1417	1849	1586	1664	1375	1411	1569	1429	1201	1316	1316	1270	1266	1228	1341	1472	566	553	629	627	542	567	583	530	562	572	586	596	563	570	603	550	1537	1802	1944	1149	916
Charlie16a	DNA	hAT-Charlie	32350	197	0.00531915	0.00735605	0.00861779	0.000613992	297	294.391	46.6746	3.32542	1042	1454	1102	1278	1148	1263	1151	1063	1009	1093	1054	1073	1142	1127	1027	1090	309	357	400	346	369	346	369	334	311	370	387	418	390	368	407	443	1108	1158	1291	819	688
Charlie17a	DNA	hAT-Charlie	8640	63	0.00546448	0.00699028	0.00959938	0.00120941	347	344.857	44.0988	5.55593	358	414	405	412	388	393	393	384	348	324	352	360	368	328	329	386	117	81	95	96	118	123	124	137	85	114	87	87	111	82	113	92	407	444	484	291	257
Charlie17b	DNA	hAT-Charlie	33010	130	0.00514224	0.00703756	0.0109128	0.000957117	303	306.385	55.6582	4.88155	1079	1291	1249	1156	1082	1088	1166	1053	1147	1094	1153	984	1144	1038	1076	1055	285	367	358	276	337	295	366	281	305	350	353	338	347	341	394	330	1121	1236	1247	791	688
Charlie17	DNA	hAT-Charlie	31381	134	0.00129212	0.00481535	0.0066686	0.000576079	286	282.149	37.6896	3.25588	651	982	792	847	707	679	744	767	508	662	633	637	614	545	626	828	263	289	323	279	290	290	300	307	315	323	342	324	322	327	368	310	849	1049	1050	661	471
Charlie18a	DNA	hAT-Charlie	37434	242	0.0035268	0.00546075	0.00713846	0.000458877	284	280.884	44.7575	2.87712	993	1388	1090	1229	1021	1075	1055	1148	873	1048	958	951	922	871	859	1078	386	429	451	385	393	451	370	361	433	432	463	463	491	495	473	457	1203	1309	1397	882	758
Charlie19a	DNA	hAT-Charlie	43766	240	0.00555556	0.00725339	0.00808776	0.000522063	299	296.508	42.9045	2.76947	1398	1622	1522	1686	1412	1486	1482	1422	1373	1341	1402	1323	1374	1281	1211	1371	520	504	501	540	536	585	464	497	483	536	515	541	564	498	554	562	1633	1751	1875	1154	968
Charlie1a	DNA	hAT-Charlie	742010	2660	0.00440045	0.0058133	0.00687755	0.00013335	286.5	285.541	39.2723	0.761456	16561	23224	18700	20524	16463	16725	18439	18548	14396	16071	15582	15631	15564	14499	15657	17468	6732	7371	7363	6935	7366	6863	6806	6259	6834	7675	7018	7623	7368	7721	7886	8023	20441	23301	24419	14191	12374
Charlie1b	DNA	hAT-Charlie	186345	952	0.00401606	0.00574488	0.00741346	0.000240271	280	276.9	44.4262	1.43986	4956	6693	5562	5964	5061	5075	5347	5514	4487	5136	4707	4686	4571	4512	4620	5299	1775	2098	1861	1778	1946	1799	1766	1634	1901	2112	1991	1945	1991	2074	2068	2054	5579	6631	6572	3971	3344
Charlie1b_Mars	DNA	hAT-Charlie	721	2	0.00896622	0.00896622	0.0103152	0.00729398	290.5	290.5	40.3051	28.5	7	27	18	18	10	22	27	17	10	10	10	8	12	7	12	18	9	6	5	13	8	5	14	6	3	7	6	17	5	10	10	5	32	30	36	8	5
Charlie1	DNA	hAT-Charlie	277537	977	0.00433369	0.00623762	0.00766162	0.000245117	291	289.972	38.3527	1.22701	6181	8738	7075	7448	6553	6455	6937	6863	5373	6133	5782	5927	5895	5740	5993	6577	2464	2791	2710	2672	2732	2545	2385	2327	2375	2755	2684	2797	2765	2700	2852	2873	7895	8770	9400	5443	4652
Charlie20a	DNA	hAT-Charlie	36181	161	0.00606061	0.0072263	0.00715638	0.000564002	311	307.23	40.9941	3.23079	1036	1302	1136	1248	951	1016	1136	1062	863	960	1013	943	865	885	985	995	383	408	428	410	392	385	338	325	343	400	390	455	442	373	385	390	1256	1406	1544	902	752
Charlie21a	DNA	hAT-Charlie	43765	174	0.00367122	0.00601106	0.00720027	0.000545851	284.5	281.425	39.4288	2.98909	823	1155	861	984	765	909	920	908	555	811	569	718	653	648	732	871	422	410	427	416	443	406	331	359	401	488	414	425	466	501	503	471	881	1107	889	635	511
Charlie22a	DNA	hAT-Charlie	28739	163	0.00687285	0.00837031	0.00933687	0.00073132	294	283.816	47.5395	3.72358	790	992	917	903	743	888	881	908	728	749	769	802	662	709	720	835	302	346	309	312	332	388	281	298	297	330	333	357	365	402	363	331	960	1135	1228	688	636
Charlie23a	DNA	hAT-Charlie	24940	157	0.00416667	0.00632378	0.00813455	0.000649208	303	303.096	41.9031	3.34423	700	979	798	897	695	789	751	878	625	771	701	699	648	656	675	800	309	249	313	287	269	265	245	264	281	290	275	297	298	343	313	329	791	918	871	539	467
Charlie24	DNA	hAT-Charlie	80067	374	0.00424722	0.00615589	0.00746685	0.000386102	297	287.385	54.9458	2.84118	2576	3287	2717	2777	2512	2496	2619	2534	2216	2405	2398	2352	2456	2192	2537	2613	834	826	798	803	810	860	879	818	719	817	816	932	832	856	921	827	2525	2716	3044	1717	1584
Charlie25	DNA	hAT-Charlie	81882	301	0.00564972	0.00715477	0.00755725	0.000435593	322	311.505	43.5758	2.51167	2012	2817	2157	2382	1891	2168	1998	2227	1742	1897	1756	1848	1816	1852	1782	2085	813	783	792	791	801	729	822	772	769	726	751	831	840	790	882	787	2138	2468	2405	1453	1282
Charlie26a	DNA	hAT-Charlie	16256	98	0.00419144	0.00551308	0.00657196	0.000663869	285.5	280.541	47.8301	4.83157	473	570	487	577	448	411	460	439	369	420	398	391	392	365	382	471	177	191	183	201	175	162	187	135	201	160	171	164	147	184	212	195	549	536	508	348	255
Charlie29a	DNA	hAT-Charlie	68730	324	0.00455603	0.00651985	0.0080734	0.000448522	300.5	296.389	47.2346	2.62414	1647	2358	1784	1987	1600	1762	1780	1806	1354	1530	1367	1533	1658	1525	1453	1881	697	694	700	605	737	674	633	587	720	790	693	712	736	719	754	721	1827	2162	2144	1308	1094
Charlie2a	DNA	hAT-Charlie	135265	505	0.00340716	0.00550752	0.00689746	0.000306933	296	294.865	39.4399	1.75505	2758	3822	2981	3314	2575	2600	2822	2856	2156	2580	2420	2392	2332	2258	2477	2835	1082	1233	1264	1277	1290	1098	1021	1016	1263	1377	1140	1222	1228	1309	1304	1439	2889	3356	3096	1836	1544
Charlie2b	DNA	hAT-Charlie	209583	884	0.00320516	0.00536921	0.00717154	0.000241205	287	284.225	41.1667	1.38459	3854	5940	4493	5046	3830	4024	4265	4425	3139	4037	3359	3630	3743	3491	3541	4381	1734	2127	1964	1850	1970	1797	1726	1506	1855	2158	1947	1982	2106	2093	2244	2094	4685	5253	5168	2955	2503
Charlie4a	DNA	hAT-Charlie	235674	1121	0.00440529	0.00612387	0.00742565	0.000221785	288	284.987	40.8247	1.21933	5687	7998	6239	6959	5843	6003	6118	6339	5133	5687	5182	5429	5534	5354	5237	6038	2259	2375	2352	2335	2437	2224	2369	2277	2189	2613	2357	2437	2359	2643	2574	2632	6906	7570	7670	4563	3939
Charlie4	DNA	hAT-Charlie	26721	161	0	0.00563736	0.00777292	0.000612592	286	282.211	46.7963	3.68806	632	952	730	829	588	700	644	701	535	583	564	602	592	609	599	732	299	268	328	231	248	264	226	239	264	360	281	320	278	306	300	296	824	956	926	544	480
Charlie4z	DNA	hAT-Charlie	49651	431	0	0.00681926	0.00921543	0.000443892	291	288.193	42.9116	2.06698	1797	2209	1973	2074	1931	1921	1994	1906	1837	1782	1802	1870	1826	1816	1694	1866	634	567	698	622	663	649	671	664	608	698	655	678	636	610	737	639	2245	2446	2660	1688	1456
Charlie5	DNA	hAT-Charlie	277310	1547	0.0035461	0.00603842	0.00804391	0.000204513	273	271.446	39.1147	0.994476	6086	9213	7083	7577	6406	6259	6751	7013	4951	6228	5395	5624	5751	5489	5754	6547	2533	2943	2873	2826	2990	2398	2380	2127	2713	3087	2939	2839	2970	3050	3153	3076	7105	8104	8279	4864	4209
Charlie6	DNA	hAT-Charlie	39013	148	0.00321557	0.00600254	0.00810117	0.000665912	288.5	277.743	52.6543	4.32816	1000	1350	1119	1199	996	1044	930	1034	843	940	855	994	876	883	840	1076	296	390	452	371	358	432	322	364	385	372	344	409	381	397	395	382	1130	1354	1329	845	708
Charlie7a	DNA	hAT-Charlie	14940	102	0	0.00519215	0.00694967	0.00068812	270.5	261.255	52.22	5.17055	371	537	411	484	413	356	434	474	289	369	290	354	333	294	366	395	166	191	179	182	182	122	136	134	152	173	164	174	172	169	189	154	400	461	529	264	252
Charlie7	DNA	hAT-Charlie	210165	844	0.00405681	0.00564145	0.00661803	0.000227802	303	298.505	42.099	1.44911	4535	6466	4994	5657	4311	4516	4676	4940	3309	4266	3858	4114	4014	3845	3814	4818	1849	2005	2025	2067	2083	1926	1851	1755	1932	2161	2040	2190	2082	2039	2235	2179	5144	5990	5542	3405	2883
Charlie8	DNA	hAT-Charlie	128347	728	0.00557107	0.00730749	0.00834522	0.000309294	305	300.212	44.8675	1.6629	4780	5447	4878	4967	4861	4927	5109	4878	4833	4555	4839	4504	4801	4351	4344	4783	1473	1487	1500	1464	1583	1462	1637	1419	1381	1631	1502	1525	1679	1542	1631	1620	5422	6336	6813	4183	3508
Charlie9	DNA	hAT-Charlie	29696	232	0	0.00624917	0.00861699	0.000565733	279.5	274.547	47.8118	3.139	927	1307	1032	1206	915	1000	1013	1038	799	913	859	886	887	947	859	938	374	379	354	385	364	403	311	362	296	341	354	371	397	399	421	380	944	1238	1236	686	608
Cheshire	DNA	hAT-Charlie	214027	1091	0.00327869	0.00627384	0.00836301	0.000253192	301	298.805	39.935	1.20904	5707	7709	6401	6785	5762	5956	6249	6345	5108	5727	5508	5478	5353	5061	5461	6222	2126	2312	2224	2155	2293	2240	2104	2038	1990	2523	2191	2453	2267	2389	2378	2377	6715	7653	8249	4676	4211
Cheshire_Mars_	DNA	hAT-Charlie	1502	6	0.00188679	0.00381144	0.00491839	0.00200793	263.5	251.833	51.2227	20.9116	50	80	70	62	58	50	66	62	58	53	50	65	52	50	53	48	5	17	18	16	15	13	15	11	19	27	13	22	26	23	23	22	41	38	77	35	31
Cheshire_Mars	DNA	hAT-Charlie	611	3	0.00492611	0.00534574	0.00556742	0.00321435	281	285.667	10.7858	6.22718	9	13	16	20	14	8	13	15	11	12	13	11	15	7	19	4	7	13	1	7	5	0	4	5	0	2	5	10	3	4	2	8	14	27	25	17	14
Cn	Simple_repeat	Simple_repeat	35003	1217	0	0.0154183	0.0244057	0.000699594	42	52.825	50.5838	1.44999	3994	3986	4132	3393	4405	4136	4341	3778	5013	4559	4567	4110	4969	4512	4829	3813	411	354	378	415	411	460	384	418	362	353	410	366	406	377	422	392	2752	3132	3389	2271	1827
CR1_Mam	LINE	CR1	45778	257	0.00696056	0.00806135	0.00848571	0.000529324	287	277.506	48.5864	3.03074	1618	1752	1800	1559	1602	1543	1681	1486	1550	1477	1657	1399	1485	1382	1586	1429	499	445	460	521	456	490	508	472	420	487	495	514	444	482	506	500	1543	1880	1875	1077	957
C-rich	Low_complexity	Low_complexity	1590856	17403	0	0.0106193	0.0300944	0.000228125	203	212.013	64.2982	0.487401	171708	153580	164174	129260	186302	163278	173101	140025	220215	173085	203538	160834	215484	190232	197468	144265	19670	17486	17780	18974	17601	24529	24618	24503	15767	16936	18785	21597	19307	17140	19947	17402	115763	135307	123015	104883	83312
CTAAAn	Simple_repeat	Simple_repeat	5857	132	0	0.000559492	0.00324845	0.000282741	34.5	38.7879	37.2237	3.23991	250	423	313	332	229	293	301	339	186	268	238	284	224	232	256	322	98	108	105	96	111	117	83	78	103	111	110	105	100	111	119	107	296	353	284	197	155
CTAAGn	Simple_repeat	Simple_repeat	266	9	0	0	0	0	0	47.6667	85.1763	28.3921	19	39	37	40	35	29	32	41	26	39	44	50	19	17	27	39	11	8	7	12	9	4	13	3	3	8	2	11	4	6	6	2	62	54	64	31	18
CTAAn	Simple_repeat	Simple_repeat	22669	519	0	0.000748281	0.00521242	0.0002288	43	57.2909	62.2904	2.73425	1142	1598	1313	1461	1138	1198	1232	1371	951	1220	1095	1149	1097	1033	1086	1265	409	508	519	467	488	400	421	454	429	509	444	504	441	508	496	467	1508	1708	1642	1019	789
CTAATn	Simple_repeat	Simple_repeat	4133	74	0	0.000626008	0.00323118	0.000375617	28.5	41.1216	50.999	5.92852	209	272	201	238	229	197	236	230	151	219	157	220	177	208	226	266	60	57	58	44	78	66	51	46	76	80	64	62	94	60	56	67	167	190	176	119	105
CTACGn	Simple_repeat	Simple_repeat	41	1	0.170732	0.170732	NA	NA	98	98	NA	NA	8	2	15	2	5	10	7	9	5	6	7	10	7	11	9	5	2	1	0	1	0	0	2	3	1	0	3	3	0	0	1	2	3	9	6	5	1
CTACTn	Simple_repeat	Simple_repeat	2803	32	0	0.00357557	0.0152677	0.00269897	40	84.6562	92.2488	16.3074	131	188	158	171	144	141	134	166	102	143	113	121	149	114	144	143	46	20	34	38	36	41	30	18	31	24	33	33	40	21	23	34	126	149	107	95	80
CTAGGGn	Simple_repeat	Simple_repeat	12332	94	0	0.00563225	0.00923948	0.00095298	157.5	161.021	88.0529	9.08196	645	833	649	718	636	758	667	773	688	710	608	752	649	749	553	852	174	103	108	106	87	131	125	129	93	91	91	152	80	68	92	81	868	965	1041	765	640
CTAGGn	Simple_repeat	Simple_repeat	1925	23	0	0.00296853	0.00911216	0.00190002	82	109.261	105.883	22.0782	261	250	287	272	230	282	290	319	283	282	337	327	278	336	389	329	30	21	10	27	23	23	25	38	20	23	9	20	18	11	26	32	189	260	245	165	144
CTAGn	Simple_repeat	Simple_repeat	2118	54	0	0	0	0	43	70.9259	82.4811	11.2243	179	183	145	175	148	181	155	166	184	147	149	144	167	147	157	165	44	43	41	38	30	54	53	37	29	54	56	46	40	39	34	36	161	211	151	103	102
CTAGTn	Simple_repeat	Simple_repeat	1319	23	0	0.00164069	0.00786846	0.00164069	62	61.3043	48.9373	10.2041	80	92	54	82	66	86	79	111	69	75	62	81	76	70	61	109	25	13	21	23	21	25	12	19	9	21	19	17	22	20	23	15	85	78	86	58	59
CTAn	Simple_repeat	Simple_repeat	52724	916	0	0.00213668	0.0106964	0.000353421	49.5	71.738	73.3409	2.42325	2462	3703	2607	2970	2369	2541	2521	2932	1916	2505	1986	2269	2193	2205	2138	2847	1012	835	889	827	859	864	857	771	743	793	909	942	877	841	926	858	2580	2997	2673	1723	1426
CTATAn	Simple_repeat	Simple_repeat	18410	219	0	0.000969275	0.00410169	0.000277166	88	103.311	83.7271	5.65775	676	1152	842	908	726	778	795	986	484	730	500	654	586	644	739	921	255	157	161	139	210	99	113	88	177	161	158	142	180	184	112	152	472	533	495	297	275
CTATGn	Simple_repeat	Simple_repeat	6580	64	0	0.00171318	0.00571146	0.000713933	81	116.281	100.795	12.5994	360	451	387	410	390	448	341	434	393	345	357	379	385	411	361	422	117	60	68	68	67	69	66	77	65	63	54	76	69	45	48	68	507	668	834	433	499
CTATTn	Simple_repeat	Simple_repeat	11995	165	0	0.000849069	0.00420801	0.000327593	40	72.2424	84.8043	6.60201	363	624	415	432	368	379	411	457	214	358	271	309	280	315	307	463	151	117	139	131	148	117	130	109	131	171	155	136	138	145	145	141	389	456	465	298	252
CTCAn	Simple_repeat	Simple_repeat	43994	474	0	0.00602641	0.0142396	0.000654048	105	121.686	95.8259	4.40143	2810	3105	2812	2756	2825	3112	2873	2928	2954	2768	2942	2817	2915	2889	2839	2800	735	528	610	627	555	759	786	823	540	536	594	702	577	582	628	585	4139	4775	4639	3253	2877
CTCCGn	Simple_repeat	Simple_repeat	1879	27	0.125	0.128885	0.0676518	0.0130196	135	144.852	108.494	20.8798	1468	992	1378	887	1568	1178	1435	964	2109	1278	2074	1400	1984	1514	1964	1001	49	41	34	34	28	54	51	40	44	21	26	24	27	34	37	35	447	550	481	412	315
CTCGGn	Simple_repeat	Simple_repeat	2600	33	0.145631	0.141018	0.0484035	0.00842597	121	144.152	103.44	18.0066	2567	1628	2696	1413	2732	1947	2805	1656	3672	2121	3540	2229	3421	2736	3550	1851	37	26	16	25	36	62	54	50	30	19	54	37	44	26	28	40	485	497	382	367	242
CTCGn	Simple_repeat	Simple_repeat	7503	177	0.214286	0.191917	0.0517652	0.00389091	107	100.102	71.6847	5.38815	6884	4513	5902	3784	8345	5486	6948	4040	10300	6636	8230	5815	9333	6740	7523	3977	225	259	233	303	204	392	310	347	199	211	246	282	286	235	252	196	2879	3360	3454	2534	1873
CTCTGn	Simple_repeat	Simple_repeat	47040	341	0	0.00272973	0.00965542	0.000522871	0	54.9003	93.5319	5.06503	4141	4571	4765	4834	3772	4913	4688	5699	4261	4451	5534	5910	3709	4472	5058	6970	880	444	569	632	566	779	846	818	509	518	676	727	618	483	599	523	7479	9795	9520	7133	6124
CTGGGGn	Simple_repeat	Simple_repeat	44026	485	0	0.0112234	0.0261139	0.00118577	119	123.045	98.0168	4.45071	6794	6020	6755	5561	7531	7366	7490	6252	9427	7418	9186	7844	8345	7866	8904	6495	674	537	564	628	484	713	791	748	488	482	573	641	575	496	619	513	5429	6725	7160	5405	4612
CTGn	Simple_repeat	Simple_repeat	128468	2170	0	0.00830283	0.0230094	0.00049394	66.5	85.9078	87.2508	1.87301	18186	16417	18655	14127	19790	17202	19700	15087	24298	18018	23210	18003	21575	18123	21176	16350	2219	2399	2449	2659	2417	3143	3146	3347	2114	2533	2499	2835	2551	2430	2744	2457	19017	23149	24891	15888	14352
CTGTGn	Simple_repeat	Simple_repeat	65018	359	0	0.00636992	0.0154252	0.000814109	77	120.309	115.489	6.09525	9602	10760	10318	9871	9395	11770	9372	11610	10009	9541	10170	10596	9212	10025	9103	11394	2215	1188	1356	1666	1292	2094	2196	2223	1138	1140	1556	1601	1607	1064	1346	1240	16376	24127	26493	18898	18357
CT-rich	Low_complexity	Low_complexity	2584061	25339	0	0.00293088	0.00824394	5.17893e-05	196	205.367	55.7236	0.350062	110236	131465	108618	106840	110309	113840	105473	105966	110964	107683	105929	98178	114140	112839	100372	106983	29288	29300	30078	31177	30448	39726	40547	40173	27305	29898	31610	37145	31705	30275	34524	30748	142826	167325	147560	120370	99080
CTTAAn	Simple_repeat	Simple_repeat	450	6	0	0	0	0	82	111.333	97.2618	39.707	9	15	18	7	10	24	16	17	18	14	11	12	5	14	18	7	5	3	6	8	2	5	2	10	3	1	5	7	3	9	20	9	19	17	13	19	12
CTTAGn	Simple_repeat	Simple_repeat	1045	13	0	0.00252747	0.00670449	0.00185949	179	144	120.652	33.4628	71	86	59	65	53	69	59	97	72	59	64	63	66	77	52	77	11	11	10	15	15	19	16	15	5	10	18	19	10	12	26	8	86	96	96	46	51
CTTAn	Simple_repeat	Simple_repeat	25611	522	0	0.000458434	0.00350322	0.000153332	96	88.8448	51.4593	2.25231	679	1230	923	915	765	842	851	921	590	829	633	723	645	755	748	997	259	337	305	309	320	207	228	218	265	353	340	291	297	324	281	315	777	951	879	552	460
CTTATn	Simple_repeat	Simple_repeat	1921	36	0	0.000608818	0.00257804	0.000429673	71	79.8611	68.5278	11.4213	87	127	98	90	80	81	72	67	60	77	62	83	77	73	67	87	27	27	36	22	25	33	26	10	23	32	25	21	30	31	31	21	92	90	66	57	35
CTTCGn	Simple_repeat	Simple_repeat	124	3	0.171429	0.150468	0.0384774	0.0222149	43	44.6667	45.5229	26.2827	8	8	13	10	12	5	15	9	6	2	14	7	8	7	11	7	4	3	0	3	6	3	6	2	1	3	1	0	2	2	2	1	15	12	15	19	13
CTTGn	Simple_repeat	Simple_repeat	47873	1038	0	0.00178592	0.00796614	0.000247257	65	64.4181	55.1963	1.71321	3067	3730	3310	3295	3130	3251	3320	3320	2986	3047	3185	3003	2937	3030	2805	3177	844	992	1044	1068	993	1252	1180	1238	1001	1039	1107	1171	985	1070	1131	1111	4637	5417	5670	3462	3135
CTTTAn	Simple_repeat	Simple_repeat	660	15	0	0	0	0	36	57.1333	60.2612	15.5594	23	22	25	20	17	12	23	11	8	21	11	15	20	20	16	24	10	14	9	9	11	10	4	4	6	2	3	4	9	16	12	5	21	28	29	18	16
CTTTGn	Simple_repeat	Simple_repeat	21080	373	0	0.0012733	0.00732734	0.000379395	40	45.3137	38.3037	1.98329	1122	1418	1142	1124	1117	1099	1211	1080	1110	1048	1052	989	1062	1032	1089	1135	303	403	323	401	334	352	350	391	332	369	357	441	357	368	358	415	1146	1300	1318	948	730
CYRA11_Mm	Unknown	Y-chromosome	412528	2869	0	0.00408792	0.0103927	0.000194028	244	210.609	89.6144	1.67306	9372	13605	9958	10743	8812	10522	9125	10116	7929	9759	8700	9702	8459	9938	8242	10612	3092	3121	2904	2958	2886	3031	3120	2851	2834	3087	2998	3440	2976	3100	3206	3143	8704	10511	10973	6573	5575
DNA1_Mam	DNA	TcMar	6949	45	0.00662252	0.00675851	0.00670689	0.000999805	269	270.511	34.4612	5.13717	172	239	209	237	181	202	203	200	171	175	187	194	179	176	160	213	74	64	94	80	59	58	55	65	86	111	66	75	78	87	94	85	202	217	236	116	113
ERV3-16A3_I-int	LTR	ERVL	237896	908	0.00410117	0.00524826	0.00601324	0.000199556	305	300.71	41.5618	1.37928	7774	9500	7654	8330	7301	8300	7297	8193	6900	7189	6770	6912	6920	7304	6188	7617	2637	2222	2278	2323	2278	2620	2409	2401	2020	2201	2181	2691	2317	2234	2444	2221	7992	9693	9429	5937	5071
ERV3-16A3_LTR	LTR	ERVL	57690	279	0.00485437	0.00612175	0.00668398	0.00040016	339	332.703	40.5527	2.42782	2472	3044	2377	2522	2445	2635	2278	2535	2545	2346	2422	2307	2562	2516	2230	2337	634	552	589	663	523	653	709	622	535	533	570	641	554	522	682	578	2435	2950	2897	1977	1655
ERVB2_1A-I_MM-int	LTR	ERVK	166388	289	0.0070922	0.00831482	0.00863279	0.000507811	154	184.637	85.1182	5.00695	3980	5112	4358	4168	4254	3986	4267	4160	3588	4163	3773	4307	3838	3496	4008	4188	1338	1475	1355	1372	1462	1432	1310	1217	1311	1491	1500	1478	1402	1555	1556	1533	3422	3957	4085	2458	2063
ERVB2_1-I_MM-int	LTR	ERVK	45007	83	0.00311042	0.00629003	0.00819401	0.00089941	163	183.446	83.1556	9.12752	976	1420	975	1150	885	999	939	1011	694	967	855	966	848	866	758	1042	357	403	355	402	368	412	382	336	344	413	366	378	420	363	402	431	941	1065	1084	726	564
ERVB3_1-I_MM-int	LTR	ERVK	110269	134	0.00374532	0.00422081	0.00419481	0.000362377	152	179.358	81.9467	7.07911	1907	2885	2179	2607	1913	2038	1991	2246	1641	2050	1884	2119	1731	1800	1811	2251	859	914	919	884	945	921	911	829	869	929	981	937	899	904	998	932	2195	2530	2862	1518	1339
ERVB3_1-LTR_MM	LTR	ERVK	43813	158	0.00514479	0.00596702	0.00612194	0.000487035	152	172.741	63.7302	5.07011	2367	1970	3262	3093	2370	1872	3588	3081	2167	1998	3326	3782	1823	1631	3453	3248	431	406	447	440	423	525	470	470	398	369	469	497	427	432	497	387	1521	1786	1729	1011	880
ERVB4_1B-I_MM-int	LTR	ERVK	753460	1368	0.00399733	0.00509221	0.00595266	0.000160941	116	120.828	59.2232	1.60121	17228	24106	18491	20242	15704	16562	16708	19930	14394	17126	15388	19271	14754	15609	16118	21706	5252	6097	5717	6060	6062	5746	5815	5164	5551	6071	6074	6443	6031	6336	6363	6579	14130	16747	16330	10004	8372
ERVB4_1B-LTR_MM	LTR	ERVK	307101	648	0.0230547	0.0226838	0.00824761	0.000323997	91	86.3704	43.9886	1.72803	10918	13282	11078	11464	9843	10835	10012	11653	10405	10635	10127	11592	9169	9579	10066	12269	2644	2467	2528	2825	2628	3139	3276	3107	2123	2492	2638	2979	2755	2440	2748	2492	11123	13625	14488	9668	8566
ERVB4_1C-LTR_Mm	LTR	ERVK	217046	961	0.0162602	0.0167636	0.00917232	0.000295881	208	186.751	66.7269	2.15248	12261	13357	12641	11451	12815	10966	12653	11886	12882	11934	13344	13487	13674	11589	13769	12624	2161	2063	2102	2257	2046	2448	2402	2377	1892	2086	2161	2357	2182	2081	2184	2014	8214	9701	9622	6598	5473
ERVB4_1-I_MM-int	LTR	ERVK	400453	296	0.00956297	0.0106193	0.00733942	0.000426595	245.5	225.139	82.0052	4.76645	9001	12363	8768	9933	8378	10686	8031	10247	8187	9648	8122	9831	7821	9592	7548	10937	2774	2412	2612	2759	2572	2921	2857	2823	2220	2490	2714	2963	2733	2521	2802	2598	7907	9921	10744	6835	5971
ERVB4_1-LTR_MM	LTR	ERVK	3189	21	0.00884956	0.0110734	0.00914388	0.00199536	210	180.619	96.9549	21.1573	90	127	129	109	90	101	115	110	102	76	88	137	84	83	86	112	46	31	23	33	38	32	49	36	35	31	26	48	39	34	44	20	141	158	173	107	86
ERVB4_2-I_MM-int	LTR	ERVK	479465	313	0.0162889	0.0169971	0.00857645	0.00048477	91	105.914	58.7451	3.32047	12596	16646	13428	15100	11550	13711	12423	14886	11499	12634	12266	14023	10642	11617	11269	15366	4398	3934	4161	4241	3928	4462	4681	4237	3588	3962	4194	4605	4105	3853	4244	4161	13588	16358	18148	11671	9943
ERVB4_2-LTR_MM	LTR	ERVK	67645	144	0.0287908	0.0275729	0.0106436	0.000886966	77.5	79.4514	47.7934	3.98278	1956	2472	2491	2791	1736	2040	2348	2725	1939	1959	2409	3448	1725	1806	2360	3368	488	482	493	577	510	567	602	528	414	456	551	554	516	406	497	440	2216	2617	2797	1828	1566
ERVB4_3-I_MM-int	LTR	ERVK	151977	99	0.010101	0.00972747	0.00663376	0.000666718	80	128.859	100.034	10.0538	4150	5989	3958	4144	4010	5033	3411	4385	3566	4892	3558	4809	3497	4615	3707	4731	1065	970	990	1003	1017	1096	987	996	817	1029	924	1065	1045	986	1068	1007	3058	3476	3484	2241	1956
ERVB4_3-LTR_MM	LTR	ERVK	58351	137	0.0111857	0.0107841	0.00464096	0.000396504	73	86.6861	44.3397	3.7882	1365	2224	1451	1564	1256	1546	1186	1570	1048	1410	997	1472	1007	1301	1062	1479	368	382	399	432	427	454	468	480	352	398	445	511	465	420	517	413	1302	1724	1535	1103	797
ERVB5_1-I_MM-int	LTR	ERVK	204434	292	0.00667219	0.0080681	0.00829125	0.000485209	127.5	156.771	79.7453	4.66674	5508	7824	5645	6540	5308	6342	5115	6410	4940	5948	5073	5913	4814	5478	4827	6476	1858	1829	1676	1853	1820	1936	2025	1909	1727	1854	1719	2094	1909	1712	1909	1744	6099	7025	7266	4919	4011
ERVB5_1-LTR_MM	LTR	ERVK	54087	143	0.00696056	0.00686856	0.0043687	0.000365329	141	140.35	32.5785	2.72435	1943	2537	1765	2043	1633	2120	1568	2094	1708	1895	1575	1866	1593	1810	1483	2078	553	560	537	563	490	583	645	585	512	506	525	591	519	504	577	534	1919	2371	2608	1591	1246
ERVB5_2-LTR_MM	LTR	ERVK	207097	520	0.00411523	0.00581423	0.00454553	0.000199335	101	98.8	29.0329	1.27318	3942	5497	3885	4520	3617	4302	3683	4298	3654	4229	3571	4147	3417	4114	3454	4615	1111	1208	1283	1240	1277	1237	1205	1213	1031	1227	1245	1368	1227	1217	1315	1273	3598	4068	4794	2747	2358
ERVB7_1-LTR_MM	LTR	ERVK	235480	770	0.0447761	0.0443341	0.0129568	0.00046693	38	58.1896	47.1759	1.7001	26815	23079	31847	26114	30064	24874	33832	30159	33513	28775	40699	38080	30405	25954	42149	32862	1982	2084	2229	2360	2038	2507	2627	2608	1984	2101	2261	2389	2075	1967	2293	2132	9867	11483	10849	7641	6193
ERVB7_2B-LTR_MM	LTR	ERVK	234162	710	0.0162715	0.017657	0.0105793	0.000397035	133	128.768	31.4789	1.18138	15406	15857	15161	13339	15971	15946	15131	14646	18918	17833	18596	17818	15627	16502	19362	15735	1672	1508	1567	1812	1594	1899	1962	1997	1406	1677	1698	1816	1685	1601	1747	1615	7303	8299	7877	5399	4367
ERVB7_2-LTR_MM	LTR	ERVK	128914	425	0.0218579	0.0207089	0.00886066	0.000429805	123	120.146	43.3409	2.10234	11838	12926	11349	9840	13084	12667	11235	10665	15421	14665	13842	13111	13081	12951	14645	11454	1152	1137	1173	1232	1229	1492	1388	1361	1034	1118	1359	1362	1225	1244	1262	1183	5740	6613	5978	4173	3367
ERVB7_3-LTR_MM	LTR	ERVK	107106	319	0.0124069	0.0134285	0.00876178	0.000490566	111	115.605	45.8954	2.56965	12291	12559	9664	7370	11158	10862	8676	7985	12187	10860	9785	8993	13840	12489	10883	8577	978	907	883	996	918	1103	1160	1059	884	921	1020	1035	957	921	939	970	4008	4615	4098	2562	2347
ERVB7_4-LTR_MM	LTR	ERVK	55922	166	0.0150565	0.0173022	0.011774	0.000913838	138.5	139.036	39.9281	3.09902	6281	7468	5320	4968	5550	6632	4789	5549	5861	5946	4963	5975	6299	7309	5732	6002	517	476	537	585	545	639	612	613	469	556	520	585	568	576	561	563	2244	2786	2606	1696	1383
ERVL-B4-int	LTR	ERVL	448596	1384	0.0040404	0.00522184	0.00581418	0.000156286	294	288.236	46.0857	1.23879	13151	17351	13264	14552	12411	13444	12421	13807	11690	12580	11734	12154	11901	11962	10955	13437	4410	4051	3939	4190	4231	4403	4458	4008	3720	4045	4204	4345	4220	4020	4245	4124	12717	15059	15550	9525	7845
ERVL-E-int	LTR	ERVL	267390	1044	0.00488407	0.00637766	0.00698206	0.000216089	318	314.936	39.1555	1.21183	8638	10511	8873	9484	8267	9148	8436	8869	7738	8044	8057	8252	8065	8373	7270	8524	2792	2513	2715	2795	2669	2897	2800	2561	2320	2813	2712	2962	2692	2621	2776	2605	8974	10452	10475	6506	5569
ERVL-int	LTR	ERVL	229042	721	0.00403226	0.00552875	0.00635904	0.000236823	292	287.061	43.6479	1.62553	6217	8915	6650	7404	6278	6972	6226	6834	5776	6053	5571	6185	5611	6284	5038	6754	2222	1997	2189	2240	2003	2169	2140	1997	1901	2169	1972	2340	2175	2083	2349	2222	6803	7958	7756	4874	4036
ETnERV2-int	LTR	ERVK	1519490	1805	0.00526316	0.00581704	0.00620071	0.000145949	155	156.522	50.9874	1.20012	30270	40687	32491	32375	30556	27136	30973	31169	28057	32080	29520	32492	30115	26782	33666	32480	8810	10491	10081	9624	10322	9268	9019	8365	9214	10738	9977	10549	10459	10387	10759	10539	21240	24595	23102	14741	11549
ETnERV3-int	LTR	ERVK	774980	560	0.00466881	0.0071819	0.00863639	0.000364954	103	113.186	52.1387	2.20326	12085	19657	13484	15021	11404	12654	12444	14997	9463	13469	10353	13612	10518	11328	11742	15860	4978	6055	5884	5653	5855	4943	4840	4592	5345	6326	5841	5881	6020	6468	6150	6243	10324	12408	12276	6755	5744
ETnERV-int	LTR	ERVK	1160863	906	0.0122412	0.0119751	0.0115851	0.000384889	63	75.7329	61.5745	2.04568	41475	42543	49715	40411	44853	34617	51567	41711	43926	40452	52124	50994	46086	35150	56884	45471	8357	8209	8503	8713	8139	8923	9120	8597	7774	8519	8242	9155	8761	8563	9276	8653	26122	29940	30805	20055	16679
Eulor10	DNA?	DNA?	3927	29	0.00606061	0.00919837	0.012397	0.00230206	299	302.448	55.5522	10.3158	144	176	142	134	153	119	134	124	166	132	156	115	139	110	104	93	46	52	54	45	42	50	34	63	43	44	37	51	39	55	41	51	130	169	164	99	64
Eulor11	DNA	DNA	8468	49	0.0078125	0.0104463	0.00975387	0.00139341	291	287.755	53.384	7.62629	362	508	402	382	297	345	321	357	293	321	303	327	330	319	317	351	100	56	84	88	80	105	85	94	83	87	100	71	72	93	104	59	257	283	326	172	184
Eulor12	DNA?	DNA?	4157	35	0.00909091	0.0120073	0.0104126	0.00176006	310	304	53.1623	8.98608	182	204	183	162	159	175	152	145	162	165	170	131	128	140	177	147	64	38	51	44	44	44	48	45	40	53	45	76	53	50	58	46	156	162	152	93	90
Eulor1	DNA	DNA	9531	56	0.00414938	0.00606213	0.0073838	0.000986701	274	270.732	37.9955	5.07736	173	319	226	218	181	189	192	207	123	171	140	188	159	149	129	190	86	96	66	89	125	110	59	73	96	133	117	93	91	122	123	111	162	198	233	118	115
Eulor2A	DNA?	DNA?	6157	41	0.00666667	0.00923742	0.0130836	0.00204331	303	287.976	55.2438	8.62763	210	248	289	192	215	195	225	216	200	194	236	206	204	181	235	224	67	69	69	88	81	68	51	73	65	59	77	63	77	63	71	95	206	236	218	140	118
Eulor2B	DNA?	DNA?	6131	42	0.00611764	0.00910184	0.0111721	0.00172389	273	274.81	46.3066	7.14527	276	288	257	273	238	182	277	270	240	210	213	232	217	199	252	239	76	72	75	63	69	66	66	56	49	76	46	66	76	63	84	68	197	232	242	152	138
Eulor2C	DNA?	DNA?	2918	24	0.0116342	0.010998	0.00999759	0.00204075	310.5	304.042	49.5988	10.1243	107	144	112	128	109	110	115	95	91	103	88	98	92	80	104	85	20	32	34	27	33	36	42	22	33	33	14	31	39	50	35	28	90	121	118	54	60
Eulor3	DNA?	DNA?	4553	28	0.0113251	0.0125412	0.0127681	0.00241295	295	294.429	28.1417	5.31829	157	196	162	157	138	137	150	152	93	142	119	131	112	105	121	155	52	45	38	35	40	34	51	62	28	35	58	45	60	42	33	48	136	169	199	117	94
Eulor4	Unknown	Unknown	5059	24	0	0.00492149	0.00880918	0.00179817	308.5	304.417	49.7218	10.1494	106	170	156	142	64	109	107	117	73	102	86	117	91	94	90	103	58	53	40	57	59	55	51	53	56	61	34	72	57	39	60	37	96	117	97	76	51
Eulor5A	DNA?	DNA?	12414	80	0.00647256	0.00642917	0.00645967	0.000722213	297.5	290.063	49.9986	5.59001	491	631	598	567	447	446	460	478	394	487	441	481	424	443	436	486	125	134	121	101	124	138	127	161	136	118	122	160	113	155	149	133	377	456	430	293	239
Eulor5B	DNA?	DNA?	4266	37	0.0102041	0.0114558	0.00961455	0.00158062	275	274.514	56.4907	9.28702	187	254	197	205	131	193	159	187	149	154	183	178	134	159	160	185	68	67	63	56	61	34	51	46	64	48	62	64	53	53	61	68	132	181	157	95	82
Eulor6A	DNA?	DNA?	2595	21	0.0121212	0.0116702	0.0130544	0.00284871	268	261.286	35.5825	7.76474	101	127	96	87	84	85	77	69	81	76	66	64	74	82	82	76	29	21	48	28	36	19	24	40	35	36	37	24	39	19	45	36	70	90	101	50	44
Eulor6B	DNA?	DNA?	9173	56	0.00675676	0.0082917	0.00966846	0.001292	301.5	292.268	45.1577	6.03445	306	401	332	355	272	331	320	331	214	268	275	286	288	266	290	330	91	97	106	129	83	79	77	71	90	98	91	96	91	82	109	100	266	292	305	187	140
Eulor6C	DNA?	DNA?	1764	15	0.00847458	0.00808169	0.00855452	0.00220877	311	296.6	56.0724	14.4778	72	77	74	73	50	76	63	68	54	64	41	64	41	52	54	60	18	13	17	27	24	20	16	7	17	18	29	21	18	28	13	24	72	68	79	25	45
Eulor6D	DNA?	DNA?	7151	47	0	0.0100109	0.0157288	0.00229429	303	293.021	53.2061	7.76091	522	610	479	456	548	470	472	456	482	446	454	478	614	552	506	489	85	97	78	111	49	97	84	67	76	78	85	103	79	67	79	90	257	259	296	181	145
Eulor6E	DNA?	DNA?	2434	18	0.0115976	0.0144949	0.0118125	0.00278422	276.5	290	39.9882	9.42532	113	117	89	99	76	115	97	94	93	107	109	106	82	83	104	106	20	26	34	29	27	21	37	16	45	25	27	40	25	21	34	40	103	109	148	70	65
Eulor7	DNA?	DNA?	575	4	0	0	0	0	318	315.5	62.5167	31.2583	5	21	21	24	13	15	7	7	4	11	6	14	7	3	14	8	6	12	4	12	4	1	0	8	6	2	14	4	10	8	3	9	4	11	16	4	9
Eulor8	DNA	TcMar?	22132	110	0.00736851	0.00847961	0.00884884	0.000843704	303	303.145	42.2789	4.03113	1027	1027	970	814	925	750	1058	797	1079	839	924	800	964	698	868	748	190	206	207	207	196	209	206	184	209	211	221	263	239	199	253	198	543	601	578	355	307
Eulor9A	DNA	DNA	8905	60	0.00795936	0.0102613	0.0107192	0.00138385	283	280.85	48.5867	6.27252	325	399	405	349	288	230	390	284	303	265	304	302	293	239	344	292	86	89	86	75	108	73	100	111	82	125	87	83	116	107	89	76	292	316	335	228	171
Eulor9B	DNA	DNA	2073	14	0.00877793	0.00760986	0.00614482	0.00164227	280	278.5	28.035	7.49267	54	67	55	61	43	35	62	52	46	61	34	46	48	45	59	56	28	14	28	22	33	13	13	18	22	17	24	8	20	22	21	19	47	47	63	28	38
Eulor9C	DNA	DNA	6953	71	0	0.00722366	0.00936437	0.00111135	268	267.437	52.6668	6.2504	311	375	313	313	330	272	354	276	349	291	301	285	282	263	308	252	78	101	79	79	84	80	69	65	83	111	82	126	102	100	106	89	274	299	292	210	144
FAM	SINE	Alu	7135	117	0	0.00945516	0.0151062	0.00139657	241	238.325	75.1939	6.95168	484	483	501	502	509	520	525	465	524	441	529	471	549	433	484	511	158	130	108	105	102	164	153	129	112	105	119	112	134	116	131	119	570	682	633	410	330
FordPrefect_a	DNA	hAT-Tip100	11103	60	0	0.00483924	0.00583187	0.000752891	358	347.617	53.9278	6.96205	367	499	370	495	353	442	397	482	375	415	327	391	393	376	334	391	136	111	95	138	118	134	142	125	118	104	98	126	126	81	110	134	471	584	545	302	283
FordPrefect	DNA	hAT-Tip100	84711	291	0.00552486	0.00825298	0.0128077	0.000750801	327	325.753	49.6343	2.90962	2845	3640	2891	3240	2744	3135	2645	3104	3010	2922	2987	3077	2974	3089	2771	2969	835	830	840	800	907	846	869	777	747	831	832	826	811	803	918	839	2633	3164	3014	1979	1643
GAAAAn	Simple_repeat	Simple_repeat	258720	4206	0	0.000319725	0.00302292	4.66114e-05	65	64.0338	39.9106	0.615394	5632	8771	6556	7106	6181	5990	6344	6392	4355	6217	4678	5399	5588	5531	5606	6346	2100	3587	3311	2884	3247	3092	3112	2903	3149	3772	3208	3603	3388	3881	3970	3949	9256	10191	9312	6757	5633
GAAAn	Simple_repeat	Simple_repeat	1377913	13380	0	0.000449496	0.00338026	2.92228e-05	71	67.8541	40.868	0.35331	23887	37850	26500	29254	24603	24937	24824	24817	17919	24281	18883	20269	23583	22967	20288	24482	9631	16208	15773	13852	15715	16256	16906	16011	14831	17334	15797	18060	16010	17764	19181	18207	39377	44565	37296	29405	23422
GAAn	Simple_repeat	Simple_repeat	696670	5564	0	0.0006592	0.00437621	5.86685e-05	66	63.5063	46.084	0.617813	13766	20576	14232	16617	12941	14110	12713	14094	10397	12566	10593	11583	11716	12203	9926	13255	5243	9058	9118	8162	8923	11244	11461	11415	8053	9371	9198	11016	9169	9401	10875	9533	25903	30078	23734	22038	17288
GAATGn	Simple_repeat	Simple_repeat	2768	43	0	0.000950358	0.00495259	0.000755263	71	99.0465	93.2518	14.2208	136	186	119	145	136	114	139	144	108	132	102	120	94	118	113	123	52	49	33	26	37	44	37	28	44	48	35	46	45	49	56	50	157	157	160	144	94
GACTGn	Simple_repeat	Simple_repeat	2715	28	0	0.00172025	0.00680665	0.00128634	113	153.821	146.718	27.7271	140	123	144	139	152	176	165	194	148	125	133	143	146	130	125	160	55	23	44	36	28	43	47	38	27	47	33	48	29	23	38	31	262	336	416	240	219
GAGAAn	Simple_repeat	Simple_repeat	185061	1656	0	0.00105889	0.00687318	0.000168899	50	53.3237	41.4271	1.01801	5656	7490	5758	5864	5740	6022	5423	5844	5056	5644	4689	4834	5568	5948	4728	5917	1910	1841	1800	1832	1959	2513	2423	2267	1727	1787	2082	2438	1995	1950	2250	1947	7090	8172	7010	5964	4932
GAGTGn	Simple_repeat	Simple_repeat	5176	48	0	0.00268133	0.00775336	0.0011191	70	113.75	103.323	14.9134	224	297	283	330	271	345	269	343	249	317	259	292	236	285	279	273	97	58	48	71	79	91	118	80	42	76	81	69	74	47	65	50	472	665	570	500	479
GAn	Simple_repeat	Simple_repeat	2882604	48020	0	0.000631391	0.0043713	1.9948e-05	16	29.942	38.3778	0.175133	153703	201480	151646	157629	152034	166379	143951	158465	142220	154523	133869	138731	155930	162303	129097	157131	47367	36792	37339	37900	38152	48031	49725	47395	33295	37146	39767	45629	39246	36285	41172	36869	162734	191772	170983	133574	111589
GA-rich	Low_complexity	Low_complexity	2525916	24762	0	0.00278092	0.00779678	4.95476e-05	195	205.272	55.7433	0.354241	110481	131845	108064	106560	110268	114401	106978	105694	111416	107515	105149	98380	115681	112247	100722	106644	28914	29855	30205	30321	30075	39355	40407	39778	26775	29660	31093	36615	31606	29198	34133	30500	143222	168480	148635	121952	100188
GATTGn	Simple_repeat	Simple_repeat	626	12	0	0.00991863	0.0219851	0.00634654	62.5	88	88.9842	25.6875	40	75	56	45	45	46	54	53	43	52	42	47	43	60	41	61	10	13	9	14	12	5	15	11	10	12	7	11	15	14	10	7	41	47	61	41	29
GCATGn	Simple_repeat	Simple_repeat	2570	41	0	0.00774984	0.0205565	0.00321038	70	79.7561	80.2044	12.5258	126	180	163	171	145	173	161	169	142	147	181	148	134	122	125	163	65	40	27	52	43	64	63	55	39	53	32	48	55	53	60	40	309	364	480	268	243
GCCTAAn	Simple_repeat	Simple_repeat	2738	25	0	0.00881566	0.0310485	0.00620971	241	215.48	113.778	22.7557	238	277	315	282	244	333	320	329	288	302	339	353	253	275	307	327	49	27	34	34	26	41	42	43	40	29	36	30	31	30	31	34	319	424	446	297	256
GCCTGn	Simple_repeat	Simple_repeat	5182	79	0	0.00515753	0.0139044	0.00156437	17	71.6456	105.222	11.8385	648	606	678	655	692	768	806	663	890	728	1056	949	673	623	961	802	99	51	81	78	95	90	118	96	54	80	62	77	95	68	102	75	871	1008	1360	836	744
GCGTGn	Simple_repeat	Simple_repeat	868	16	0.123476	0.126633	0.0542821	0.0135705	98	107.812	84.842	21.2105	173	135	172	171	208	163	173	157	256	191	238	177	227	225	201	178	20	19	13	7	14	42	18	24	20	15	18	16	9	10	19	11	187	232	237	172	160
GC_rich	Low_complexity	Low_complexity	295555	8072	0.2	0.188501	0.0749794	0.000834548	19	27.7831	32.1123	0.357421	340351	234778	343557	223450	382564	288994	386077	248975	511785	351699	501574	366409	469078	382143	466083	262775	5805	5852	6411	7635	6486	8852	8641	9041	5607	6445	6761	7583	7032	6388	7247	6311	79646	87480	89501	74174	49323
GCTGn	Simple_repeat	Simple_repeat	13993	223	0	0.0024664	0.0098672	0.000660757	48	71.9327	82.6729	5.53619	1326	1336	1402	1202	1474	1416	1492	1289	1808	1394	1668	1367	1625	1488	1586	1277	247	231	242	264	255	277	284	329	212	219	214	297	274	247	253	230	1730	1999	2103	1410	1234
GCTTGn	Simple_repeat	Simple_repeat	3146	53	0	0.00204483	0.00857059	0.00117726	55	70.3396	71.6057	9.83581	290	299	237	258	323	348	252	241	326	258	298	221	290	284	241	245	36	52	45	50	81	78	66	76	59	53	52	58	47	57	65	47	314	379	379	251	191
GGAAAn	Simple_repeat	Simple_repeat	137037	1250	0	0.000464294	0.00342989	9.70119e-05	46	50.98	39.9341	1.12951	3616	5051	3490	3871	3625	3472	3324	3347	2859	3283	2881	2890	3264	3324	2946	3277	1128	1852	1874	1883	1775	2369	2456	2319	1683	1867	1820	2100	1790	1847	2220	2095	6500	8040	6364	5283	4272
GGAAn	Simple_repeat	Simple_repeat	740106	8115	0	0.000712502	0.00422556	4.69073e-05	73	68.5282	43.7308	0.485448	20875	28958	21343	23315	20955	22326	20004	20910	18890	20352	17616	17538	20519	20847	16617	20667	6941	8457	8974	8447	8573	11574	11589	11332	7781	8569	8877	10670	9024	8672	10446	9194	38288	45143	38015	31434	25869
GGAGAAn	Simple_repeat	Simple_repeat	134320	958	0	0.000856425	0.00552154	0.000178393	77	74.6868	39.4775	1.27546	4010	5116	4339	4495	4142	4299	4151	4183	4078	4172	3880	3972	3791	3738	3463	4304	1318	1606	1602	1599	1608	2181	2314	2305	1440	1561	1808	2034	1757	1701	1851	1662	7527	8881	6660	6867	5433
GGAGAn	Simple_repeat	Simple_repeat	180397	1472	0	0.000761095	0.00450861	0.000117514	60	60.2174	40.4269	1.0537	6940	9430	6669	6905	6811	7923	6375	7385	6701	7242	6042	6941	6917	7986	6119	8012	1775	1484	1477	1625	1384	2114	2114	2163	1318	1392	1648	1956	1430	1288	1653	1329	7497	8594	7182	6925	5454
GGAn	Simple_repeat	Simple_repeat	544461	6554	0	0.00175045	0.00810187	0.000100076	89	82.2783	42.5021	0.524997	30081	34555	30348	31254	31839	32869	30182	32669	33156	31187	32310	32370	32545	32405	29694	36319	7423	7784	8039	8442	7845	11875	11780	11740	7062	7624	8696	9934	8714	7937	9265	8045	47810	55661	47062	46486	36538
GGATGn	Simple_repeat	Simple_repeat	14998	139	0	0.00268215	0.00658242	0.000558314	107	133.942	116.244	9.8597	1670	1519	1491	1342	1710	1634	1552	1488	1807	1560	1799	1466	1974	1778	1758	1413	241	138	166	164	159	186	186	208	135	164	185	186	140	136	152	132	1069	1223	1152	1019	733
GGCTGn	Simple_repeat	Simple_repeat	14340	217	0	0.00833904	0.0199004	0.00135093	57	87	98.5016	6.68672	3307	2787	3146	2320	3615	3251	3367	2774	4286	3193	4146	3016	4061	3677	4036	2785	285	220	223	243	204	264	274	265	162	192	222	247	239	170	230	174	2418	2917	3489	2229	1917
GGGAAn	Simple_repeat	Simple_repeat	104095	826	0	0.000314379	0.00205911	7.16454e-05	51	54.3402	40.5053	1.40936	3603	4667	3225	3853	3700	3889	3236	3667	3454	3645	3199	3425	3429	3768	2874	3811	889	941	1069	1127	996	1528	1679	1573	956	984	1182	1408	1086	1031	1219	1035	5913	7362	5521	5924	4758
GGGAGAn	Simple_repeat	Simple_repeat	231021	2209	0	0.00113069	0.00547052	0.000116394	67	66.321	41.2068	0.87674	10277	13054	9748	9889	10295	11490	9460	10356	10171	10588	9601	9771	10791	11513	9410	10604	2281	1793	2013	2116	2017	2856	2798	2914	1655	1797	2139	2415	2230	1797	2151	1846	10807	12856	11213	9446	7722
GGGAn	Simple_repeat	Simple_repeat	367029	5298	0	0.00169469	0.00753824	0.000103565	77	73.1937	44.2693	0.6082	19917	22337	19831	17232	21127	19694	19696	17916	22487	20084	20323	16710	23544	21178	20132	17955	3900	3678	3649	3581	3580	4714	4785	4656	3267	3493	3794	4338	4035	3652	4042	3778	21432	25221	23513	19736	16113
GGGGAn	Simple_repeat	Simple_repeat	105000	1397	0	0.00177719	0.00681499	0.000182334	68	66.748	42.3987	1.13437	6046	6961	5907	5704	6345	6388	6145	6199	6647	6670	6548	6543	6775	6915	6471	6780	960	868	869	903	853	1171	1084	1187	773	787	877	1033	949	787	881	824	4909	5613	5269	4349	3472
GGGTGn	Simple_repeat	Simple_repeat	50386	1117	0	0.00623515	0.0155066	0.00046397	40	67.9606	82.4766	2.46777	6093	6109	5677	5108	6609	6573	6243	5569	7690	6874	6814	6003	7113	7049	6490	5787	931	713	653	806	702	827	863	861	578	700	676	792	775	705	755	686	5051	5676	6063	4734	3758
GGTTGn	Simple_repeat	Simple_repeat	8142	139	0	0.00234588	0.00838293	0.000711031	53	58.9281	58.9818	5.00277	414	509	454	504	448	462	464	495	462	445	449	432	402	426	399	484	134	120	111	139	141	163	139	153	111	117	159	156	116	136	132	146	541	588	586	499	424
Gn	Simple_repeat	Simple_repeat	36797	1267	0	0.0152181	0.023798	0.000668578	42	54.7782	50.0787	1.4069	3588	3921	3714	3357	4032	3755	3975	3680	4271	4227	4315	3880	4397	4278	4344	3815	419	397	375	375	385	418	391	360	347	418	421	442	375	355	407	379	2892	3183	3408	2291	1844
G-rich	Low_complexity	Low_complexity	1631244	17888	0	0.0103607	0.0297934	0.000222761	203	212.289	63.605	0.475566	167466	155507	158909	127847	180178	161340	167057	137727	213761	170424	195100	158124	208228	186537	187966	142487	20659	17624	18750	19548	18591	25067	25888	25772	15876	17425	19344	22068	19614	17499	20435	18227	121750	141835	129226	110556	87821
GSAT_MM	Satellite	Satellite	220772	87	0.0183007	0.0183556	0.00657668	0.000705094	228	208.126	61.5278	6.59647	683	900	707	831	592	713	697	703	633	678	609	697	519	534	643	681	422	478	596	576	497	848	837	895	470	469	800	649	704	460	517	511	1354	1504	1427	1158	940
GTATGn	Simple_repeat	Simple_repeat	7535	78	0	0.00465868	0.0126707	0.00143467	101	120.321	92.016	10.4188	460	534	447	458	412	497	426	516	357	406	367	391	415	407	393	438	132	74	99	86	87	70	90	96	73	77	82	81	114	76	76	95	435	509	485	364	262
GTCTGn	Simple_repeat	Simple_repeat	4384	60	0	0.00735649	0.0174818	0.00225689	85.5	103.367	91.233	11.7781	351	398	444	438	356	391	451	436	383	416	503	589	327	369	484	520	95	69	66	54	53	75	56	69	51	54	53	81	51	46	60	64	397	528	437	321	263
GTGTGn	Simple_repeat	Simple_repeat	32645	312	0	0.00388555	0.0107975	0.000611287	97.5	111.519	94.5142	5.35081	1999	2274	2036	2143	2063	2285	2042	2440	2185	2140	1985	2232	1980	2020	1872	2308	638	338	347	386	345	579	608	581	301	299	449	457	394	327	380	364	3871	4689	4909	3695	3082
GTTTGn	Simple_repeat	Simple_repeat	115769	2665	0	0.000905514	0.00547411	0.000106039	25	30.3917	33.3996	0.646983	6319	8211	6817	7331	6562	6830	7090	6814	5776	6895	6356	6472	6061	6209	6296	6905	2053	2484	2442	2442	2466	2749	2775	2746	2264	2458	2375	2710	2273	2440	2746	2627	8353	9679	9813	6343	5325
HAL1b	LINE	L1	148785	763	0.00277008	0.00532618	0.00713415	0.000258274	290	278.569	57.3225	2.07521	3694	5041	3965	4265	3563	3671	3869	3719	2942	3276	3121	3329	3278	3190	3066	3636	1378	1570	1574	1369	1592	1363	1511	1404	1462	1573	1552	1668	1550	1684	1750	1624	3991	4623	4284	2799	2344
HAL1	LINE	L1	805629	3550	0.00441503	0.00594533	0.00695296	0.000116696	304	299.607	42.7687	0.717814	20846	26947	23574	24872	21484	22180	22851	23358	19076	20526	20511	20211	19813	18935	19607	21856	7649	8092	8318	8298	8287	8335	8351	7783	7636	8352	8197	8886	8415	8341	9064	8730	25116	28855	29071	18272	15541
HAL1M8	LINE	L1	150876	710	0.004	0.00586403	0.00720845	0.000270528	284	278.246	41.3199	1.55071	4176	5704	4771	4922	4284	4400	4611	4592	3758	4172	4082	4057	4070	3836	3985	4437	1636	1696	1553	1547	1583	1657	1687	1484	1393	1612	1653	1712	1636	1623	1688	1726	5236	6042	6141	3668	3252
HAL1ME	LINE	L1	179011	900	0.00396832	0.00589825	0.00726642	0.000242214	301	293.027	48.1068	1.60356	4370	5940	4737	5196	4149	4497	4559	4401	3769	4192	3856	3886	3914	3972	3727	4243	1566	1927	1959	1833	1805	1818	1810	1709	1805	2028	1936	2001	1940	1985	2016	2061	4945	5853	5629	3512	3028
HAL1_SS	LINE	L1	20592	79	0	0.0014134	0.00309899	0.000348664	288	285.886	34.7334	3.90781	151	349	184	260	171	152	218	259	153	216	145	148	166	167	193	256	91	220	133	125	158	102	88	85	171	192	111	88	119	162	107	178	271	274	250	150	146
hAT-N1_Mam	DNA	hAT?	29812	185	0.00529101	0.00668625	0.00767046	0.000563943	282	273.259	51.1194	3.75837	843	1230	975	1027	938	996	890	920	794	849	876	839	803	831	735	973	345	353	339	322	351	340	357	273	307	352	314	378	331	346	403	375	983	1114	1160	634	549
Helitron1Na_Mam	RC	Helitron	14309	62	0.00551672	0.0079476	0.00791868	0.00100567	303	294.435	39.087	4.96405	325	457	391	427	334	332	324	391	305	351	294	318	300	297	325	360	134	144	178	115	129	151	135	136	135	150	126	167	133	141	123	131	390	379	495	234	237
Helitron1Nb_Mam	RC	Helitron	17957	92	0.00499129	0.00735339	0.0101054	0.00105356	287.5	279.87	47.518	4.95409	393	598	491	530	388	431	441	520	330	438	363	414	393	366	388	459	183	149	225	186	201	167	200	170	162	195	195	178	182	179	228	163	568	568	584	378	344
Helitron2Na_Mam	RC?	Helitron?	10979	74	0.00505475	0.00803439	0.00965459	0.00112232	296.5	290.095	45.1339	5.24671	329	419	313	376	340	311	322	333	295	276	302	260	266	272	270	328	134	97	118	118	100	100	130	111	116	115	133	146	120	126	144	139	388	447	416	253	183
Helitron3Na_Mam	RC	Helitron	34560	191	0.00662252	0.00761819	0.00795712	0.000575757	314	310.953	48.5892	3.51579	1215	1489	1240	1294	1209	1153	1213	1240	1024	1127	1088	1075	1171	1140	1101	1227	369	379	382	368	364	334	358	374	316	358	341	421	399	424	423	404	1185	1487	1529	947	787
HERV16-int	LTR	ERVL	65345	277	0.00444444	0.00556163	0.00616608	0.000370484	321	320.329	37.2254	2.23666	2101	2589	2154	2441	1994	2270	2066	2179	1840	1988	1902	2049	1842	1932	1748	2108	711	702	659	701	615	737	681	710	633	667	627	766	682	617	744	667	2350	2658	2829	1663	1443
HERVL32-int	LTR	ERVL	125	1	0.008	0.008	NA	NA	299	299	NA	NA	8	3	3	7	2	6	5	4	5	2	4	2	5	5	1	1	1	1	1	2	0	1	0	0	0	3	2	1	0	1	5	1	2	6	7	4	4
HERVL40-int	LTR	ERVL	46704	204	0.00285312	0.00443497	0.00540916	0.000378717	313	311.059	35.3278	2.47344	1504	1912	1518	1712	1416	1726	1485	1569	1339	1467	1464	1506	1335	1454	1252	1490	499	506	454	451	436	499	446	493	399	475	520	554	465	420	471	516	1516	1713	1929	1051	977
HERVL74-int	LTR	ERVL	43454	149	0.002886	0.00446903	0.00557548	0.000456761	300	300.255	40.3957	3.30935	1057	1544	1190	1273	1025	1148	1127	1292	954	1119	934	1131	947	967	966	1150	405	404	431	353	358	409	427	321	350	353	392	403	383	416	358	406	1084	1333	1309	775	682
HUERS-P3b-int	LTR	ERV1	268	3	0	0.00314465	0.0054467	0.00314465	338	313.333	44.4672	25.6732	13	12	10	14	10	10	8	18	13	20	11	7	9	15	7	9	4	3	2	2	1	5	8	7	3	8	0	6	9	5	6	7	17	23	27	12	15
HY1	scRNA	scRNA	3481	38	0	0.00591933	0.0101617	0.00164845	153.5	149.553	50.5573	8.20147	267	296	270	234	281	301	295	251	298	282	307	268	314	317	328	270	63	55	42	63	33	44	53	48	50	52	44	61	55	46	77	48	198	213	246	143	101
HY3	scRNA	scRNA	998	15	0	0.00806228	0.0106751	0.00275629	188	158.267	69.509	17.9471	107	114	132	129	146	115	160	120	134	131	112	133	153	113	164	126	8	31	17	17	13	23	7	18	20	10	20	13	11	16	18	18	58	46	68	29	20
HY4	scRNA	scRNA	251	3	0	0.00411523	0.00712779	0.00411523	230	241	49.4267	28.5365	13	12	21	16	12	7	19	11	17	8	11	7	11	13	8	15	7	3	3	3	6	3	3	1	1	4	4	10	2	1	4	4	9	10	11	6	3
HY5	scRNA	scRNA	75	1	0.0133333	0.0133333	NA	NA	147	147	NA	NA	5	1	2	0	2	1	2	0	1	3	0	1	1	2	2	3	2	3	0	0	0	0	1	0	2	0	1	1	0	2	2	0	2	4	5	0	2
IAP1-MM_I-int	LTR	ERVK	396617	479	0.0142349	0.0160167	0.00891463	0.00040732	69	105.273	85.3563	3.90003	9407	12831	10009	11291	8456	9600	8889	11053	7724	8929	8758	10802	7596	8419	8297	11823	3050	2828	2795	3122	2824	3158	3225	3098	2455	3046	2946	3272	2822	2904	3071	2839	9635	11704	12297	8062	6846
IAP1-MM_LTR	LTR	ERVK	114929	420	0.020443	0.0202976	0.00916554	0.000447233	68	78.8905	38.868	1.89656	7447	8490	8636	9854	7345	8446	8945	11903	8485	8582	10404	12753	7840	8013	11419	14184	1057	1048	1004	1187	1023	1113	1259	1287	970	1029	1120	1282	1093	1040	1136	1081	4822	5687	5860	3795	3168
IAPA_MM-int	LTR	ERVK	37463	126	0.0551181	0.051985	0.0168294	0.00149929	103	88.2937	40.1559	3.57737	1539	2054	2686	3811	1389	1777	2503	4192	1493	1740	2811	4805	1120	1679	2695	5235	391	360	352	415	410	510	478	393	348	358	406	462	438	377	472	415	1647	1992	2279	1461	1106
IAP-d-int	LTR	ERVK	644477	1323	0.0128332	0.0127047	0.0104427	0.0002871	145	149.339	72.0875	1.98189	15007	19947	16764	18422	13336	15723	14699	18142	12866	14372	14594	17484	12318	13352	14072	18312	5222	4608	4789	5312	4896	5658	5673	5199	4362	4925	4982	5513	5100	4748	5230	5062	17735	21504	23234	15434	12859
IAPEY2_LTR	LTR	ERVK	343759	1062	0.047619	0.0474507	0.0120638	0.000370186	56	67.1648	33.3164	1.02234	22130	21158	31024	28600	20232	17677	29486	31565	23787	20070	34930	35326	19440	16300	36561	35030	3540	3000	3117	3387	3327	3865	3915	3747	2763	3015	3277	3770	3336	3066	3409	3095	16154	19456	20766	13397	11870
IAPEY3C_LTR	LTR	ERVK	137710	475	0.0325733	0.0317896	0.00825315	0.000378681	47	51.6716	31.8677	1.46219	4396	5552	5669	5746	3733	4687	5296	6224	3957	4454	5933	6560	3434	4087	5719	7144	1213	945	1053	1174	952	1308	1233	1372	844	967	1096	1245	1066	917	1085	1089	4792	5831	6128	4017	3425
IAPEY3-int	LTR	ERVK	2094047	2345	0.0140449	0.0163481	0.010588	0.000218647	123	125.425	50.8454	1.04998	39381	57088	44004	50253	33491	43489	38255	50472	32480	38777	38698	49076	31015	38760	37547	55918	13778	12557	12765	13654	12765	14039	14671	13550	11459	12457	12864	14558	12762	12711	13734	13104	42255	51747	57069	36181	31181
IAPEY3_LTR	LTR	ERVK	167557	553	0.0398671	0.0407555	0.0112266	0.000477403	95	97.9277	54.9653	2.33736	8208	9128	12833	12048	7310	7901	12337	13802	8235	7883	14145	15288	6505	6752	15080	15327	1798	1472	1477	1694	1584	1838	1855	1805	1390	1521	1556	1769	1656	1467	1692	1514	7128	8604	9205	6065	5358
IAPEY4_I-int	LTR	ERVK	421782	521	0.0243902	0.022829	0.0123636	0.00054166	73	83.5336	56.2037	2.46233	14498	18688	14920	16648	14510	16190	14367	16017	13574	14415	14573	16087	13830	15199	14028	16791	4670	4590	4436	4717	4557	4971	4859	4581	4128	4589	4553	5116	4526	4469	5069	4639	13003	15873	17635	10992	9314
IAPEY4_LTR	LTR	ERVK	29904	95	0.0306748	0.0289166	0.00653803	0.000670787	25	34.7789	42.2762	4.33745	9065	8742	7681	7122	8495	9183	7402	8259	9880	9724	9003	10033	8936	10154	9583	9004	420	338	346	388	311	402	392	385	367	337	310	389	378	326	321	321	1357	1667	1320	852	607
IAPEY5_I-int	LTR	ERVK	122173	184	0.0179341	0.0235801	0.0195913	0.00144429	133.5	119.793	67.9301	5.00788	2369	3428	2457	3137	2075	2705	2132	3028	2038	2368	2240	2973	1782	2206	2073	3380	718	775	773	786	736	873	933	857	696	752	772	844	789	781	778	745	2745	3479	3680	2379	2002
IAPEY5_LTR	LTR	ERVK	67912	237	0.0341297	0.0343741	0.00905491	0.00058818	71	68.0633	29.5461	1.91923	2398	3027	3310	3948	2129	2557	3316	4225	2314	2476	3566	4552	1962	2119	3769	4722	592	522	536	578	508	653	611	630	535	528	541	646	626	532	576	564	2510	3069	3321	2156	1939
IAPEy-int	LTR	ERVK	2341002	755	0.0142876	0.0174991	0.0103569	0.000376927	63	71.9351	48.7833	1.77541	30659	48068	38212	41357	25497	35306	32840	41050	24510	30864	33167	39940	24455	32634	32924	45396	11435	10634	10148	11157	10721	11563	11860	10992	9163	10710	10739	12047	10707	10610	11641	10609	31355	39007	45342	28091	24564
IAPEY_LTR	LTR	ERVK	476732	1410	0.0494792	0.0510718	0.0131467	0.000350113	86	93.6121	47.9591	1.27721	18511	19971	31493	26406	16953	16835	29312	29423	19904	17344	34475	34322	14823	14732	36950	32583	3168	2955	2973	3255	2991	3515	3722	3525	2606	2793	3139	3333	3085	2824	3221	2963	13306	16402	18462	12504	10676
IAPEz-int	LTR	ERVK	11883078	7319	0.0198004	0.0236239	0.0178811	0.000209011	58	59.5706	38.1343	0.445749	312432	420241	384843	475226	284956	336013	353599	483800	274032	306140	352124	484690	260927	302300	340027	567177	117070	103569	104851	114522	105571	120499	120912	114308	94926	106716	108549	120477	109174	104621	115825	106931	387214	457716	546822	347865	286883
IAPLTR1a_Mm	LTR	ERVK	604427	1786	0.0591716	0.0567328	0.00789931	0.000186917	33	52.8718	38.9034	0.920549	22060	26377	45006	47108	20424	22682	44031	57544	23307	22556	49175	59465	18057	20475	51192	72027	5911	6115	6204	7107	6118	8010	7989	8001	5556	6213	6441	7549	6896	6253	7210	6481	28278	34859	40383	26929	22141
IAPLTR1_Mm	LTR	ERVK	551227	1492	0.0543478	0.0538491	0.00538376	0.00013938	16	35.189	42.0634	1.08898	18770	21879	48798	49386	18263	19074	48578	62986	19016	18327	54162	64831	16227	17480	57212	81621	4842	4861	5121	5765	5168	6868	6786	6860	4607	5272	5372	6143	5576	5335	5951	5300	24988	30041	33785	22573	18841
IAPLTR2a2_Mm	LTR	ERVK	628796	1541	0.0344037	0.0346322	0.00722688	0.000184098	42	53.5172	38.7353	0.986746	22008	27021	28705	30442	19394	22268	26827	32598	20595	22326	29477	37336	17515	19361	29929	36129	5274	5705	5604	6190	5648	7053	7350	7055	5060	5431	5954	6815	5919	5792	6381	5866	23659	27883	30072	20829	17265
IAPLTR2a	LTR	ERVK	243139	627	0.0502646	0.049833	0.00758935	0.000303089	37	49.6619	35.2326	1.40706	9903	11860	19165	21951	9200	10515	18755	27029	10479	10744	21681	28451	8020	9274	23025	32874	2107	2077	2015	2407	2100	2714	2793	2768	1894	1949	2192	2674	2295	2130	2412	2120	10498	12019	13680	9473	7922
IAPLTR2b	LTR	ERVK	316192	1017	0.0477612	0.0472246	0.0103722	0.000325246	57	59.7394	31.4018	0.984678	12124	14824	23994	28440	10853	12938	23503	35283	12202	12932	27540	36967	9697	10582	29373	41027	2880	2905	2816	3268	2973	3440	3619	3406	2412	2865	2865	3295	2796	2784	3238	3011	13129	15462	17108	11823	9867
IAPLTR2_Mm	LTR	ERVK	626514	1388	0.0494443	0.0511673	0.0110674	0.000297065	78.5	77.7939	40.478	1.08649	29410	33296	53192	56418	28189	31192	51567	67234	31779	31250	60825	70562	25281	27688	64252	83181	5720	5572	5614	6308	5554	7442	7446	7440	4928	5361	6163	6907	6098	5470	6372	6062	27649	32134	36238	25915	21544
IAPLTR3-int	LTR	ERVK	1715061	1773	0.0123239	0.0132731	0.00788566	0.000187277	114	145.241	74.5359	1.77015	27134	38877	27302	29299	23301	29378	23534	29107	23295	26478	24146	28509	21406	28117	24384	32238	8400	7633	7871	8358	7687	8596	9261	8642	6815	7796	8297	9072	8040	7940	8426	8101	23379	29689	34861	21097	19274
IAPLTR3	LTR	ERVK	318160	959	0.0287356	0.0307933	0.0103093	0.000332906	153	136.762	44.1865	1.42686	6299	8503	7184	7252	5224	6846	6018	7889	5866	6239	7070	8206	4849	6419	6971	8786	1620	1349	1450	1675	1394	1846	1970	1886	1253	1438	1504	1800	1531	1477	1557	1505	5780	7455	8822	5610	5068
IAPLTR4_I	LTR	ERVK	102274	183	0.0275672	0.0300252	0.011962	0.000884253	82	94.9617	47.9289	3.54301	2621	3543	2974	3491	2139	2645	2685	4046	2067	2714	2668	3924	2037	2501	2956	4741	749	666	737	775	736	862	806	837	644	752	813	834	660	765	766	780	2936	3482	3700	2616	2106
IAPLTR4	LTR	ERVK	214337	663	0.0230548	0.0247076	0.010056	0.000390544	119	99.7813	38.6663	1.50168	5545	7888	7005	7946	4775	6204	6383	8763	4749	5978	6672	8792	4350	5628	6868	10156	1708	1406	1508	1627	1595	1770	1860	1775	1302	1550	1642	1724	1569	1470	1730	1483	6275	7490	8376	5236	4746
ID2	SINE	ID	406697	5671	0	0.00746486	0.011093	0.000147306	266	263.256	48.18	0.639789	23192	26607	25525	25001	25394	24834	26890	25411	25011	24006	26043	23914	25001	23261	24979	24338	7432	6481	6489	6569	6279	7111	6799	7027	5987	6515	6595	7136	6916	6311	7055	6716	28284	32314	36057	21087	18830
ID4	SINE	ID	1721682	23970	0	0.00791166	0.0113498	7.33088e-05	263	262.183	47.4039	0.306182	95515	112284	107522	106844	105571	105866	112163	107332	100639	99962	108119	100411	101821	95037	101660	103299	31603	27402	28323	29034	28165	30963	30188	29137	25769	27620	28522	30738	29049	27402	30210	27839	122346	139494	153784	90677	81694
ID4_	SINE	ID	1872384	26384	0	0.00692337	0.0106737	6.57122e-05	266	264.609	47.9911	0.295454	100795	120900	114867	115731	112200	112432	120183	114335	106592	105585	113519	106197	107738	100915	108115	110690	34705	29701	30102	31214	30284	32447	32506	31362	27509	29931	31014	33340	31160	29882	32718	30450	132788	150273	170052	97247	89709
ID_B1	SINE	B4	14590832	110827	0.00552486	0.0078715	0.0104204	3.13012e-05	265	265.446	44.4128	0.133409	652103	735261	719848	707935	735965	714638	774278	720650	713752	676388	755886	690598	696290	652833	705037	696997	205834	177581	184556	191939	181300	210599	207083	201462	166621	180320	189797	203742	191909	179098	198233	182382	869477	996966	1081359	640540	577184
ID	SINE	ID	483775	8022	0	0.00808518	0.0138931	0.000155116	267	265.13	49.1893	0.549199	31880	36166	34889	34528	35675	34280	37569	35176	34268	33074	36554	33974	34079	32522	34181	34348	9795	8259	8760	8700	8211	9736	9296	8874	7753	8460	8697	9551	8935	8265	9206	8547	41157	47299	51696	30475	27344
IMPB_01	Satellite	Satellite	3077624	26753	0	0.00568788	0.0136199	8.32696e-05	183	183.75	52.4685	0.320784	147128	182504	157716	162947	146546	164640	154074	165849	144229	148306	146460	147867	146666	153086	134890	162106	47122	32590	34381	34970	34225	43538	44471	43275	29566	32026	36110	40813	35591	31990	36192	31969	194764	234653	213625	153270	126259
Kanga11a	DNA	TcMar-Tc2	42768	187	0.00526316	0.00675331	0.00732768	0.000535853	307	301.845	37.8337	2.76668	1047	1487	1301	1368	1064	1139	1099	1267	888	1015	967	1028	1026	1064	986	1174	409	484	444	453	419	479	451	433	420	469	466	542	455	457	430	443	1249	1533	1518	873	737
Kanga1a	DNA	TcMar-Tc2	39258	191	0.00398406	0.00595159	0.0068285	0.000494093	306	302.848	48.5033	3.50958	1111	1573	1194	1319	1095	1174	1108	1119	944	1068	984	1017	1048	1058	930	1125	393	412	399	363	419	394	421	425	421	407	446	420	438	406	426	449	1069	1384	1302	794	632
Kanga1b	DNA	TcMar-Tc2	24701	121	0.00561798	0.00762705	0.00886111	0.000805555	303	301.231	42.3711	3.85192	1008	1148	1100	902	974	915	1038	921	1035	923	1114	788	1027	917	1165	819	262	258	254	253	297	251	231	265	265	277	228	265	262	314	284	250	800	919	1008	543	543
Kanga1c	DNA	TcMar-Tc2	35856	184	0.00679119	0.00862	0.00942651	0.000694932	302.5	295.94	49.3212	3.63601	866	1240	1021	1173	878	966	976	963	734	869	828	814	885	840	789	989	361	342	437	353	426	359	397	360	365	396	368	406	401	404	407	418	1163	1334	1414	825	673
Kanga1d	DNA	TcMar-Tc2	21110	131	0.00576369	0.00755102	0.00893453	0.000780613	289	285.794	45.8056	4.00205	723	849	773	856	696	767	764	762	683	709	729	663	781	669	668	719	258	244	277	270	237	247	218	218	258	252	237	278	267	239	256	284	772	928	927	584	502
Kanga1	DNA	TcMar-Tc2	66678	321	0.00512821	0.00719327	0.00935322	0.000522046	298	296.034	43.1209	2.40678	1780	2449	1926	2191	1821	1885	1866	1974	1608	1753	1736	1740	1747	1502	1628	1840	700	742	695	693	648	781	668	623	626	779	728	730	755	741	707	714	1988	2235	2321	1416	1217
Kanga2_a	DNA	TcMar-Tc2	81110	356	0.00372544	0.00602351	0.0072458	0.000384027	300	295.385	41.3404	2.19104	1902	2610	2134	2459	1817	2097	2001	2187	1561	1779	1617	1748	1737	1649	1773	2022	734	777	837	891	866	793	737	687	852	825	824	893	847	866	959	834	2161	2621	2592	1551	1293
L1M1	LINE	L1	129960	881	0	0.00500766	0.00751083	0.000253046	270	263.926	45.602	1.53637	3447	5120	3936	4333	3435	3612	3748	3922	2841	3545	3144	3406	3103	3025	3076	3883	1357	1387	1371	1293	1346	1319	1283	1181	1307	1358	1273	1453	1353	1536	1551	1442	3753	4373	4192	2610	2190
L1M2a1	LINE	L1	704	11	0	0.00454365	0.00817793	0.00246574	217	206.727	58.0725	17.5095	48	62	64	43	55	67	56	71	62	43	37	33	52	45	38	52	21	9	10	11	15	21	8	6	2	13	10	13	11	8	7	10	60	64	75	45	55
L1M2a	LINE	L1	57971	208	0.00416674	0.0054095	0.00619154	0.000429306	296	293.558	48.8911	3.38998	1521	2166	1562	1832	1447	1600	1511	1700	1363	1505	1426	1458	1419	1391	1353	1649	572	511	517	546	490	536	479	531	423	587	574	609	522	493	516	613	1772	2057	1974	1278	1108
L1M2b	LINE	L1	2048	16	0.00646211	0.0110977	0.014033	0.00350826	225.5	222.563	67.8036	16.9509	100	89	94	87	81	94	102	91	111	74	67	80	98	94	100	78	17	15	13	15	11	24	23	23	22	6	14	25	24	14	21	13	140	187	132	97	85
L1M2c	LINE	L1	97916	321	0.00323625	0.00470146	0.00598475	0.000334036	289	283.056	42.7153	2.38414	1977	2859	2217	2309	1913	1879	1849	2032	1524	1736	1669	1803	1639	1697	1665	2017	774	942	937	805	871	886	850	754	797	859	928	960	945	1066	1008	964	2300	2609	2559	1686	1337
L1M2	LINE	L1	5439191	18488	0.00264667	0.00434237	0.00584594	4.29942e-05	284	278.979	38.6799	0.284472	103610	157187	114968	129451	98878	103130	105043	114449	79128	101698	86319	95077	88164	88355	89265	109423	44413	49468	48270	45636	48307	44561	44802	41013	45479	51502	47561	51008	49583	51061	51896	52427	110957	130091	125190	75469	61461
L1M3a	LINE	L1	31047	120	0.00196069	0.00412071	0.00552314	0.000504192	291.5	295.575	51.7017	4.7197	742	1103	827	910	702	721	762	764	614	636	673	678	688	728	648	710	226	269	286	353	317	283	258	230	260	264	315	273	280	323	341	261	690	837	719	497	383
L1M3b	LINE	L1	48542	169	0.00246914	0.00386819	0.00489712	0.000376702	291	293.272	52.9518	4.07321	1231	1773	1359	1478	1170	1302	1170	1342	954	1146	1044	1168	1063	1236	1012	1293	442	453	424	425	392	448	444	419	365	463	432	490	447	446	453	444	1214	1536	1458	976	750
L1M3c	LINE	L1	97623	337	0.00316456	0.00509657	0.0066166	0.000360429	288	283.78	41.4013	2.25527	2021	2969	2233	2427	1852	2154	2081	2186	1550	1838	1688	1918	1637	1730	1761	2050	894	949	771	885	910	800	871	805	865	882	828	884	863	902	993	899	2136	2669	2294	1456	1222
L1M3de	LINE	L1	44549	157	0.0029703	0.00479321	0.00683867	0.000545785	295	295.089	57.8889	4.62003	1100	1569	1188	1226	1041	1158	1021	1222	901	1100	851	989	947	983	953	1208	420	434	433	411	450	401	398	382	371	405	409	434	444	393	503	412	1257	1444	1349	874	647
L1M3d	LINE	L1	42597	171	0.00321543	0.00475385	0.00585721	0.000447912	297	292.24	47.6561	3.64435	1011	1389	1197	1290	1015	1125	1034	1125	874	1017	911	959	850	923	844	1101	387	380	368	413	391	429	397	380	376	390	398	385	397	401	453	406	1104	1393	1320	774	698
L1M3e	LINE	L1	183095	652	0.00297178	0.00434331	0.00556895	0.000218097	290	288.284	44.3716	1.73772	5315	7480	5570	6187	5142	6090	5320	6093	4765	5668	5004	5536	4944	5617	4709	6171	1683	1626	1558	1627	1689	1661	1648	1624	1480	1681	1596	1686	1707	1673	1842	1661	5916	7076	7369	4641	4147
L1M3f	LINE	L1	26045	100	0.00252274	0.00386514	0.00506865	0.000506865	282.5	277.69	39.7258	3.97258	791	1026	855	806	757	844	734	786	688	678	611	680	761	753	749	726	218	235	236	266	233	224	217	256	203	261	239	237	234	244	279	289	639	750	780	455	454
L1M3	LINE	L1	1709224	7043	0.00301205	0.00506578	0.0068113	8.11616e-05	273	268.706	40.7175	0.485179	36371	53310	40675	45125	35613	37576	38284	40554	29331	36281	32068	33861	32426	31903	32465	38693	15130	16870	16304	15864	16430	15350	15109	14309	15280	17151	16120	17326	16873	17208	17400	17491	41757	48480	47948	28918	23825
L1M4a1	LINE	L1	148825	607	0.00323625	0.00523407	0.00696805	0.000282825	283	280.974	41.4041	1.68054	3630	4663	3856	4285	3287	3386	3556	3743	2918	3402	3090	3302	3091	3163	3204	3662	1353	1357	1415	1393	1513	1406	1460	1269	1317	1460	1491	1520	1361	1454	1643	1498	3991	4687	4563	2741	2416
L1M4a2	LINE	L1	179163	736	0.00295641	0.00499558	0.00640798	0.000236201	279	275.454	47.8689	1.76447	4042	5634	4373	4766	3912	4132	4102	4249	3325	3865	3477	3765	3391	3591	3520	4116	1675	1778	1606	1751	1791	1723	1688	1598	1600	1810	1694	1836	1690	1827	1871	1815	4385	5183	4906	3057	2571
L1M4b	LINE	L1	662342	2190	0.00365632	0.00586428	0.0112953	0.000241365	292	291.333	43.6927	0.933657	18560	23554	19784	20057	18488	18059	19116	18976	17514	17951	18557	18157	17717	17293	18580	18821	5560	5818	5878	5576	5845	5758	5767	5268	5484	6141	5772	6170	6126	6337	6358	6293	16585	19511	18217	11608	9757
L1M4c	LINE	L1	624281	2049	0.00320513	0.00479674	0.00592948	0.000130992	284	280.869	41.3614	0.913743	12589	17623	13754	15176	12016	12894	13075	14001	10007	12188	11263	11983	10774	10975	11184	13327	5157	5782	5478	5494	5721	5343	5516	4959	5227	5862	5508	5896	5808	5964	6001	6133	14308	16564	15977	9677	8147
L1M4	LINE	L1	3394522	13935	0.00330579	0.00516688	0.00683181	5.78739e-05	281	277.104	43.3057	0.366853	71812	100159	81935	89506	73248	73713	80501	81590	61331	71023	68082	68597	66423	63585	67321	76323	30278	33659	32743	31336	32871	31018	30515	29215	30808	34522	32429	34505	33224	34692	35509	35190	88027	101631	102499	61324	52068
L1M5	LINE	L1	3563400	16596	0.00341589	0.00534087	0.00693428	5.38269e-05	296	292.087	43.4525	0.337297	73264	106427	83704	93513	73811	75765	80861	83062	59668	71970	65802	67832	66851	63677	66254	77672	33233	37249	36412	34281	37241	33743	32990	30986	34432	38400	36741	37916	37386	38907	39371	39638	90096	104807	103321	61677	51964
L1M6B	LINE	L1	6062	43	0.00442478	0.00609037	0.00838303	0.0012784	286	280.93	40.5876	6.18955	282	300	282	287	297	297	288	271	266	236	290	284	293	254	270	271	77	71	70	72	58	93	71	74	57	76	71	50	106	70	69	78	270	288	273	175	143
L1M6	LINE	L1	62821	329	0.00234742	0.00520907	0.00702685	0.000387403	286	282.976	42.6694	2.35244	1983	2452	2157	2075	1893	1902	2093	1942	1829	1890	1950	1701	1906	1683	1936	1772	585	672	665	586	688	680	633	691	615	698	673	797	736	693	717	735	1983	2297	2022	1402	1101
L1M7	LINE	L1	44578	207	0.00537634	0.00692841	0.00791139	0.000549879	289	284.957	46.9744	3.26495	1326	1528	1358	1425	1374	1260	1455	1350	1150	1211	1318	1168	1167	1085	1282	1266	403	476	520	443	433	475	464	451	416	490	437	549	468	458	523	470	1350	1588	1536	964	905
L1M8	LINE	L1	50717	201	0.00461894	0.00539496	0.00605481	0.000427073	286	286.294	36.0197	2.54063	1287	1825	1450	1491	1320	1350	1454	1403	1158	1297	1285	1303	1245	1240	1165	1463	462	568	497	445	486	532	471	466	498	575	476	515	500	529	492	606	1375	1710	1550	955	802
L1MA10	LINE	L1	180350	866	0.00332779	0.00552433	0.0070383	0.000239171	278	273.301	40.1757	1.36523	4335	5969	4695	5106	3993	4441	4128	4693	3260	4051	3429	3797	3734	3709	3521	4438	1769	1695	1857	1641	1749	1662	1507	1559	1448	1712	1651	1791	1623	1774	1844	1818	4475	5227	5025	3082	2499
L1MA4A	LINE	L1	797078	2709	0.00390625	0.00534156	0.00647569	0.000124418	284	280.379	33.0827	0.635618	17021	24389	18932	21450	16383	17255	17465	19137	13523	16630	14602	15729	14789	14410	14644	17899	7272	7282	7266	6861	7263	6900	7145	6561	6760	7705	7450	7671	7649	7709	8055	7634	19895	22408	22293	13557	11153
L1MA4	LINE	L1	2191101	7467	0.00371747	0.00523901	0.00685519	7.93316e-05	280	276.316	34.052	0.394066	46759	66901	51053	58275	43930	47253	46826	51140	36022	44991	39265	42232	39372	40217	38649	47670	20109	20136	19606	19290	20136	19151	19120	17687	18426	20699	20127	21405	19890	20370	21688	20889	52257	60806	59237	36270	29361
L1MA5A	LINE	L1	414518	1231	0.00420168	0.00557366	0.00717203	0.000204415	284	277.679	36.6063	1.04334	9042	12829	9938	11370	8494	9064	9116	10186	7136	8815	7529	8411	7680	7844	7509	9497	3811	3776	3759	3787	3737	3682	3734	3424	3550	3960	3746	4313	3841	3941	4088	4173	9946	11973	11503	7271	6037
L1MA5	LINE	L1	1286433	4952	0.00374532	0.00548022	0.00684896	9.73272e-05	274	269.191	38.8332	0.55184	29128	42908	33096	37008	28322	30281	30422	32913	23499	28627	25752	27288	25698	25943	26016	31328	12380	12109	12040	11699	12217	11476	11862	10738	11233	12457	11937	12773	12246	12412	12705	12696	32431	37130	36613	22592	18427
L1MA6	LINE	L1	1931242	6985	0.00371747	0.00532805	0.00663103	7.9341e-05	275	271.207	37.2468	0.445662	43742	64589	47746	54513	41000	44513	43512	48602	33697	42635	36639	40491	37077	38269	37329	46395	17953	17669	17281	16786	17387	16527	16200	15261	16163	18070	16930	18597	17581	18035	18502	18507	45640	53072	51431	31415	25959
L1MA7	LINE	L1	854612	3250	0.00371747	0.00517511	0.00622885	0.000109261	271	267.708	37.602	0.659583	18837	28032	20843	23521	17719	19374	19195	21256	14773	18612	15748	17393	16885	16647	16339	19976	8036	8223	7809	7488	8110	7522	7401	7046	7479	8208	7932	8312	8074	8410	8462	8172	21252	24407	23991	14472	12084
L1MA8	LINE	L1	1056251	3882	0.00355241	0.00508033	0.00630936	0.000101265	266	261.904	37.0424	0.594527	22915	34113	25413	28704	21946	23373	23720	25656	18312	22609	19594	21579	20072	20186	20008	24516	9591	9879	9473	9193	10039	9074	9287	8520	8900	10334	9668	10203	10037	10269	10360	10270	24563	28735	27715	16685	13878
L1MA9	LINE	L1	1234802	4587	0.00338983	0.00493442	0.00614523	9.07348e-05	273	268.867	38.8675	0.573881	27072	40052	29008	33413	25010	27767	26774	30002	21126	26076	22310	24420	23053	23577	23074	28393	11447	11646	11159	10926	11309	10585	10889	10108	10479	11528	11359	11890	11620	11776	11591	11918	28769	33718	32478	19604	16349
L1MB1	LINE	L1	679027	2524	0.00425532	0.00600132	0.00700062	0.000139345	280	275.893	37.4611	0.745652	16624	24046	18342	20346	16242	17264	16939	18578	13531	16177	14604	15569	14564	14558	14397	17556	6541	6580	6442	6274	6450	6440	6158	5859	6155	6810	6596	6883	6506	6616	6704	6775	18296	20827	20816	12929	10752
L1MB2	LINE	L1	762172	2927	0.00546448	0.00698013	0.00747495	0.000138165	272	267.879	39.0214	0.72126	19579	25924	21973	23862	19415	21183	21407	22286	17731	19312	19070	19001	18357	18053	18076	20824	7659	7458	7415	7305	7649	7570	7645	7449	6758	7503	7550	8235	7670	7566	8226	7700	24931	28900	29483	17653	15141
L1MB3	LINE	L1	1380733	5343	0.0060241	0.00776697	0.00831523	0.000113758	274	270.085	38.2505	0.523293	37242	47491	41314	45397	39065	40954	41564	42625	34809	37540	38114	37100	35596	34942	34755	39849	15038	13731	14196	13974	14207	14890	14864	13986	12829	14192	14371	15122	14426	13947	15115	14420	48886	57355	58322	36259	30654
L1MB4	LINE	L1	677810	2690	0.00458191	0.00632729	0.00740459	0.000142766	274	268.9	40.9151	0.788874	17083	21987	18977	20498	17575	17882	19288	18965	15437	16725	16601	16315	16155	15539	15875	17946	7088	6884	6693	6572	6632	6805	6828	6126	6227	6794	6826	7168	6811	6818	7379	7115	20678	24040	24291	14857	12596
L1MB5	LINE	L1	986410	3766	0.00540249	0.00708222	0.0078599	0.000128079	281	278.295	39.196	0.638706	24403	31811	28190	29399	26158	27395	28125	28577	23059	24786	24648	24506	23757	23235	23308	26462	10253	10096	9860	9641	9825	10185	9968	9571	9164	9990	9791	10663	10270	9931	10666	10148	32204	37390	38688	23601	20207
L1MB7	LINE	L1	1882408	6956	0.00486028	0.00649011	0.00746756	8.95362e-05	276	273.47	38.6183	0.463035	45338	58728	51492	55765	46438	47738	50300	51126	40167	43959	44803	43742	43107	40424	42208	47888	19147	18760	19074	18688	18551	18746	18525	17463	17416	19357	18708	20212	19366	19370	20380	19750	59021	68088	70727	42211	36198
L1MB8	LINE	L1	1585896	6000	0.00485437	0.0064702	0.00739191	9.54292e-05	278	273.548	39.5469	0.510548	36643	50441	41944	46164	37864	40062	41218	42890	32276	36866	35955	36112	34925	33979	33937	40504	15927	15512	15681	14987	15353	15357	15212	14721	14154	15855	15377	16303	16132	15959	16644	16129	48843	55198	58325	33967	29282
L1MC1	LINE	L1	1676137	5571	0.00480769	0.00636854	0.00711952	9.53859e-05	276	273.646	38.1836	0.511576	42202	58371	45942	50656	40150	43797	42670	46154	35481	41394	38437	40169	37655	37462	37296	44683	15620	15868	15380	15418	15470	15744	15524	14205	14159	15985	15354	16352	15806	15878	16773	15958	46254	54010	54047	33260	27461
L1MC2	LINE	L1	644912	2252	0.00441015	0.00607094	0.00714963	0.00015066	277	273.646	39.4173	0.830621	14940	21510	16844	18204	14745	15783	15743	17009	12863	14856	13717	14391	13253	13670	13559	16127	6159	6147	5962	5919	6009	5992	5909	5440	5486	6104	6172	6501	6074	6416	6432	6300	17076	19810	19296	11831	10140
L1MC3	LINE	L1	1546737	5288	0.0041841	0.00564265	0.0066244	9.10963e-05	285	281.651	38.2199	0.525586	37464	53419	40096	44702	36877	39065	37653	41124	30842	36193	32513	34537	33429	33365	32463	38882	14757	14593	14318	14110	14640	14148	13888	13251	13114	15128	14164	15046	14673	14823	15020	14770	41454	48162	47791	29381	24216
L1MC4a	LINE	L1	718213	3077	0.00383142	0.00563439	0.00689252	0.000124255	287	282.862	44.2612	0.797921	17336	24219	19639	21714	17416	18658	18931	20036	15131	17371	16481	16718	16152	15741	15763	18928	7369	7321	7417	6902	7273	7092	6916	6486	6540	7393	6953	7730	7390	7361	7760	7537	21984	25418	26628	15484	13435
L1MC4	LINE	L1	1284553	5589	0.00414938	0.00575481	0.00689329	9.22061e-05	291	285.751	41.1893	0.550956	31472	42415	35275	38880	31849	33656	34649	35378	27731	31222	30140	30334	29953	29078	29108	33672	12977	13221	13264	13087	13109	12840	13086	11963	12068	13653	12916	13964	13641	13532	14216	13792	39779	46423	47490	28206	24253
L1MC5a	LINE	L1	508400	2588	0.00400803	0.0060359	0.00789544	0.000155201	282	277.003	41.3062	0.811957	12599	17028	14305	15586	12954	13265	14047	13954	10942	12455	12256	12369	11893	11427	11817	13412	5190	5564	5327	5418	5386	5319	5089	4826	5083	5705	5301	5885	5548	5582	5878	5660	15787	18140	18424	11049	9469
L1MC5	LINE	L1	792475	3476	0.00454545	0.00598135	0.00687905	0.000116678	289	285.143	41.3578	0.701484	17616	24643	19892	22768	18374	18726	19556	20526	15293	17546	16843	17048	16949	15926	16459	19221	7840	8250	8327	7949	8231	7695	7760	6777	7560	8608	8118	8539	8379	8372	8843	8371	22729	26243	26978	15601	13829
L1MCa	LINE	L1	988746	3565	0.00318471	0.00481	0.00621756	0.000104133	281	279.049	40.4057	0.676725	22929	32582	24499	26839	22004	23120	23128	24450	18766	22312	19857	21227	20260	20114	20183	23884	8280	9082	8968	8439	8978	8503	8705	8220	8316	9089	8900	9356	8762	9351	9395	9515	23026	27313	26030	16259	13336
L1MCb	LINE	L1	205398	713	0.00398406	0.00514863	0.00591248	0.000221424	296	293.899	41.3055	1.5469	5110	7182	5540	5946	4790	5191	5037	5199	3875	4930	4278	4755	4175	4454	4228	5148	1786	1847	1829	1813	1941	1817	1812	1631	1658	1888	1842	2100	1879	1906	2003	1916	4613	5594	5310	3501	2757
L1MCc	LINE	L1	120446	529	0.00403226	0.00506491	0.00602842	0.000262105	296	292.013	45.2447	1.96716	3359	4458	3651	3672	3426	3466	3537	3505	3087	3282	3116	3076	3132	3102	3185	3413	1123	1132	1063	1154	1094	1163	1131	1085	1158	1197	1153	1274	1197	1253	1328	1157	3395	4074	3930	2418	2038
L1MC	LINE	L1	1271172	5426	0.00296297	0.00500282	0.00676091	9.17837e-05	281	277.567	44.171	0.599649	26239	38426	29918	33166	26366	26835	28963	29863	21376	26675	23831	24956	23743	22831	24292	28286	11072	12819	12435	12019	12269	11449	11293	10348	11654	13163	12238	12919	12654	13174	13377	13720	30366	34792	34109	20714	16867
L1MD1	LINE	L1	669152	2268	0.0046602	0.00614666	0.00718244	0.000150817	280	278.76	36.0347	0.756658	14881	20688	16679	18398	14956	15897	15904	16649	12556	14445	13470	14061	13652	13251	13232	15622	6253	6403	5984	6020	6240	5939	6098	5736	5616	6306	6325	6825	6482	6411	6954	6610	17688	20860	20540	12494	10356
L1MD2	LINE	L1	847541	3227	0.00452489	0.0060702	0.00702087	0.000123592	291	286.853	41.8635	0.736947	19594	26565	22104	24044	19612	20442	21007	22216	16799	19064	18587	18961	18149	17240	17730	20842	7798	7603	7896	7655	7546	7668	7604	7310	7122	7987	7917	8519	8037	8034	8602	8392	22279	26507	26007	16192	13426
L1MD3	LINE	L1	529177	2480	0.00312013	0.00541155	0.0071417	0.000143409	283	279.236	41.4017	0.831366	12980	18288	14140	15484	12974	13694	13977	14160	11161	13072	12098	12870	11973	12045	12011	13617	5086	5397	5083	5098	5188	4925	5064	4564	4683	5372	4979	5299	5237	5343	5525	5286	15019	17465	17253	10417	9002
L1Md_A	LINE	L1	32690648	16844	0.00805164	0.00980181	0.00812515	6.2605e-05	19	38.7408	52.7254	0.406253	1133486	1444332	911484	1107695	1036859	1212864	822598	1116921	1173770	1323571	889494	1192468	908240	1169588	869453	1249373	250441	243478	239638	250195	243791	268845	275062	258071	218617	245664	244960	275823	249453	244583	266103	247906	935851	1123158	1207999	1098014	839947
L1MDa	LINE	L1	940002	3451	0.00358423	0.00519045	0.00654696	0.000111447	285	284.624	42.326	0.720502	21136	29195	23334	25521	21054	21944	21723	23152	18144	20807	19368	19979	19280	19284	19113	22092	7973	8782	8512	8342	8726	8756	8353	8109	8061	9166	8618	9037	8726	9066	9349	9164	23527	27791	27019	17288	13843
L1MDb	LINE	L1	141260	583	0.00298507	0.00603579	0.0148738	0.00061601	293	291.834	45.139	1.86947	3876	4917	4479	4396	3941	3943	4111	4160	3894	3848	4158	3948	3679	3838	4092	4004	1232	1228	1250	1257	1312	1147	1250	1201	1162	1345	1349	1326	1240	1231	1331	1329	3482	3908	3922	2601	2003
L1Md_F2	LINE	L1	74093504	64898	0.00713568	0.00757671	0.00473894	1.86023e-05	63	67.7369	28.3839	0.111418	1584712	2390596	1587591	1894514	1403741	1669689	1369855	1761947	1254059	1598949	1250302	1566745	1254578	1476881	1255401	1791226	539034	533514	524125	540779	532351	572103	581896	549427	480511	536705	530866	590588	542812	534901	568488	542848	1586989	1872723	1862567	1277573	1030868
L1Md_F3	LINE	L1	14879062	16146	0.00852299	0.00907597	0.0056722	4.46395e-05	47	55.9016	36.2883	0.285584	327308	481166	334647	381080	291201	339381	292980	362358	270512	334840	277036	331360	259190	305409	284123	373627	105890	105054	103345	106966	105940	112518	115435	107937	95017	106062	105574	115108	106697	105946	111958	107658	314890	371515	367464	252585	205205
L1Md_F	LINE	L1	5919327	4016	0.00884956	0.0118782	0.0123216	0.000194433	119	121.412	44.8619	0.707914	132142	186920	124938	151068	116473	140506	106431	145189	115338	137673	106094	141417	107250	130208	103968	157575	39632	40477	39869	41153	39994	43908	45585	42642	36423	40258	40848	46036	40730	40395	43805	41166	129260	157155	158749	109387	88023
L1Md_Gf	LINE	L1	2386826	1080	0.0100379	0.0153852	0.0146676	0.00044632	73	71.3806	40.6385	1.23659	119517	129793	80845	90445	115335	121633	74145	97391	147874	140264	88541	119346	114951	134070	90468	115300	14233	15029	14628	15246	14845	16541	16962	16244	13294	15027	15468	17147	14827	14828	16291	15178	49765	58191	54475	38457	28941
L1MD	LINE	L1	1427085	6361	0.00235018	0.00460449	0.00622972	7.81099e-05	282	278.675	41.6576	0.522314	27000	39658	30625	34419	26824	27565	29444	30698	21561	26744	23857	25274	24410	23602	24669	29086	11913	13977	13522	12734	13669	12200	12178	11426	12877	14223	13072	13826	13607	14059	14377	14411	32352	37313	36645	22348	18280
L1Md_T	LINE	L1	48698338	23688	0.00851064	0.00948559	0.00588413	3.82312e-05	35	37.5329	26.2573	0.170603	2023095	2406584	1529162	1785653	1935994	2089068	1392464	1812692	2265766	2285114	1505250	2005764	1896335	2190311	1510435	2026065	373055	365392	358867	377411	364243	402221	416365	390448	330190	368753	367765	414721	373423	367250	399383	373058	1207869	1408629	1381768	954747	739868
L1ME1	LINE	L1	1474673	5261	0.00446429	0.00594486	0.00667333	9.20044e-05	294	289.805	37.2359	0.513367	32233	45239	36889	40300	32268	33574	34330	36473	27134	31763	29429	30650	29488	28605	28728	33725	14118	14314	14170	13681	14430	13752	13404	12684	13059	14722	14040	14972	14517	14840	14779	14737	38790	45720	45749	27290	23106
L1ME2	LINE	L1	711621	2633	0.0047619	0.00634239	0.00723044	0.000140909	296	292.785	37.2435	0.725814	15714	21786	17693	19314	15656	16501	16741	17561	12879	15225	14475	14697	14139	14003	14105	16513	6749	6811	6884	6628	6981	6479	6600	6218	6468	7147	7001	7190	7208	7075	7219	7120	18879	22108	20941	12877	11023
L1ME2z	LINE	L1	359592	1533	0.00405954	0.00585551	0.00711341	0.00018168	279	273.534	42.2966	1.08028	7842	10529	8979	10301	8087	8258	8561	9167	6940	7695	7329	7432	7397	7131	7027	8545	3472	3749	3596	3394	3607	3482	3251	3065	3386	3750	3601	3812	3559	3578	3846	3638	9942	11502	11616	7101	5908
L1ME3A	LINE	L1	497886	2086	0.0047619	0.00645386	0.00739706	0.000161958	297	293.93	40.1329	0.878706	12196	16407	13862	15275	12157	12750	12882	13727	10419	11882	11431	11937	11088	10747	11006	12842	5255	4983	4678	4701	5070	4926	4876	4606	4276	4985	4767	5203	5031	5015	5130	5048	14388	16660	16893	10364	8673
L1ME3B	LINE	L1	166494	735	0.00413223	0.00591198	0.00692249	0.00025534	298	294.237	39.7937	1.46781	3807	5451	4248	4755	3872	4177	4078	4375	3144	3756	3552	3724	3559	3485	3345	4148	1675	1646	1676	1634	1706	1485	1603	1483	1551	1726	1741	1812	1717	1706	1809	1746	4574	5258	5296	3387	2859
L1ME3C	LINE	L1	77038	326	0.00461916	0.00603328	0.00711513	0.00039407	304	299.196	37.9435	2.1015	1674	2250	1798	2049	1565	1726	1632	1806	1175	1640	1354	1395	1514	1379	1353	1646	724	754	728	769	746	691	694	658	708	838	807	802	810	909	813	798	1895	2199	2267	1415	1094
L1ME3Cz	LINE	L1	208578	1051	0.00428266	0.00618842	0.00771586	0.000238003	279	270.607	50.1472	1.54684	4833	6782	5414	5802	4906	5042	5308	5333	3911	4678	4289	4444	4347	4149	4153	5089	2167	2200	2047	2089	2183	2048	2036	1946	2027	2328	2212	2499	2236	2307	2284	2331	5858	6705	6708	4190	3441
L1ME3D	LINE	L1	76016	323	0.00469484	0.0058334	0.006482	0.000360668	297	294.161	42.0055	2.33725	1828	2548	1985	2150	1746	1951	1948	2028	1513	1813	1590	1615	1509	1562	1522	1910	797	737	758	736	744	738	712	644	639	766	765	777	728	800	832	854	1953	2329	2367	1418	1252
L1ME3E	LINE	L1	78250	327	0.004329	0.0062898	0.00771532	0.000426658	301	297.024	41.1768	2.27708	1702	2473	1970	2267	1705	1934	2046	2043	1461	1650	1722	1733	1500	1551	1690	1993	848	789	787	738	734	692	777	662	656	824	765	851	803	817	830	844	1998	2329	2187	1328	1071
L1ME3F	LINE	L1	76664	308	0.00444444	0.00634642	0.00724509	0.000412827	299	293.045	47.9885	2.7344	1643	2239	1708	2015	1595	1683	1614	1821	1313	1442	1454	1444	1436	1423	1348	1728	750	760	746	704	769	723	759	705	722	764	740	863	790	836	828	781	1906	2291	2206	1321	1104
L1ME3G	LINE	L1	207412	1161	0.00395257	0.00634905	0.00799054	0.000234509	276	269.666	51.58	1.51379	4985	6768	5551	6340	4978	5295	5412	5771	4333	4896	4618	4680	4569	4451	4431	5193	2184	2262	2328	2203	2365	2214	2187	2023	2072	2380	2410	2395	2357	2323	2465	2503	6417	7165	7381	4396	3787
L1ME3	LINE	L1	363519	1527	0.00497512	0.00609273	0.00660149	0.000168936	299	293.988	41.2205	1.05486	9077	12087	10025	11057	9019	9652	9535	9877	7809	8732	8154	8315	8174	8321	7985	9353	3741	3610	3694	3596	3453	3642	3477	3338	3238	3656	3433	3757	3735	3657	3874	3817	10581	12191	12223	7344	6045
L1ME4a	LINE	L1	324624	1560	0.00377718	0.0054959	0.00667938	0.000169112	289	284.081	46.9085	1.18765	5530	8233	6732	7727	5814	6188	6594	6806	4442	5697	5066	5321	5145	4940	5009	6196	2955	3461	3392	3145	3433	2778	2916	2700	3415	3585	3258	3405	3395	3767	3796	3655	7242	8378	8408	4802	4145
L1ME4b	LINE	L1	344072	1818	0.00458191	0.00639987	0.00785228	0.000184162	284	277.262	45.3637	1.06393	8715	11174	9844	10548	8981	9252	9826	10126	7889	8655	8644	8562	8391	7880	7922	9142	3642	3821	3806	3626	3918	3734	3476	3469	3511	3780	3812	3880	3690	3855	4081	3893	10622	12237	12657	7605	6479
L1ME4c	LINE	L1	185175	968	0.00451978	0.00631858	0.00770114	0.000247524	280	272.273	47.137	1.51504	4105	6111	4751	5545	4315	4397	4536	4703	3591	4057	3753	3943	3979	3843	3582	4370	1885	2034	2057	1899	1983	1918	1750	1674	1932	2044	2088	2111	2064	2156	2287	2183	4976	5711	5878	3482	2841
L1ME5	LINE	L1	39706	146	0.00549517	0.00699402	0.00770828	0.000637942	297.5	287.945	44.9887	3.72329	856	1209	975	1134	850	1014	901	988	753	885	820	828	867	800	747	948	401	385	360	380	403	404	354	400	323	395	382	392	395	379	382	333	1073	1438	1376	859	725
L1MEa	LINE	L1	41021	169	0.00381679	0.00599307	0.00764488	0.000588067	298	296.846	39.2084	3.01603	927	1254	1040	1143	867	998	945	1040	753	867	801	850	848	782	862	1004	384	414	397	461	427	395	449	370	417	403	401	431	426	433	449	470	1246	1282	1360	834	716
L1MEb	LINE	L1	77682	352	0.00407934	0.00522747	0.00630193	0.000335894	299	295.108	44.413	2.36722	1815	2554	1962	2198	1850	1994	1893	2001	1610	1775	1585	1740	1676	1707	1610	1931	759	791	765	723	875	768	864	785	760	771	835	902	822	807	878	802	2121	2517	2614	1573	1326
L1MEc	LINE	L1	1449461	5378	0.0039943	0.00542567	0.00632096	8.61931e-05	292	289.269	40.6431	0.554213	31974	44502	36070	39375	31866	33257	34244	35898	26868	31410	29541	30438	29419	28133	28703	33843	12906	14363	13508	13581	13924	13479	13608	12725	12569	14220	13575	14835	14368	14379	15083	14557	37354	43550	42792	26270	21810
L1MEd	LINE	L1	707485	3245	0.00229885	0.00467592	0.00648137	0.000113778	302	299.709	42.4507	0.745209	14312	20729	15995	17961	14533	15090	15488	16150	12139	14090	12719	13336	13389	13073	12781	15142	6022	7289	6991	6813	7131	6704	6581	6241	6624	7527	6683	7479	7297	7594	7724	7712	17618	20666	20125	12360	10128
L1MEf	LINE	L1	803664	3127	0.00343643	0.00494994	0.00615418	0.000110054	300	295.702	40.5255	0.72471	15644	22774	17951	19898	15434	16469	16790	17934	12938	15610	13723	14689	14152	13763	13798	16803	7052	7913	7841	7266	7620	7317	7008	6816	7314	8150	7806	7868	7799	8037	8234	8401	19212	22182	21788	13511	10917
L1MEg1	LINE	L1	19049	92	0.0037915	0.00575928	0.00729829	0.0007609	298	296.065	37.0324	3.8609	570	671	608	667	570	555	561	552	503	483	491	491	514	466	509	536	181	226	214	209	229	199	211	187	213	198	207	204	229	210	240	235	634	677	695	440	317
L1MEg2	LINE	L1	22493	112	0.00337545	0.00569696	0.00692554	0.000654402	309	300.313	43.9189	4.14994	701	996	755	847	690	772	713	760	649	785	617	708	659	603	707	741	220	278	251	242	209	258	289	238	211	232	224	241	209	262	252	240	661	870	799	511	391
L1MEg	LINE	L1	836405	3797	0	0.00417394	0.00602805	9.78265e-05	294	290.112	42.2369	0.685444	16434	24217	18563	20616	16637	17399	17779	18867	13255	16492	14445	14869	15130	14782	14783	17584	7150	8554	8209	7657	8309	7977	7875	7405	7663	8838	8250	8574	8349	8829	8972	9111	20284	23281	22255	14411	11318
L1MEh	LINE	L1	40223	202	0.00469577	0.00533597	0.00597284	0.000420247	285.5	281.05	41.5853	2.92593	1071	1336	1099	1123	924	1024	1036	1066	816	887	923	807	874	810	867	1016	388	387	382	383	412	396	415	394	394	477	421	456	418	396	452	464	1046	1234	1209	767	628
L1MEi	LINE	L1	103286	478	0.00343063	0.00548657	0.00698995	0.000319713	285	280.349	43.8768	2.00688	2391	3292	2766	2999	2455	2520	2641	2737	2255	2331	2259	2331	2282	2155	2157	2550	918	1068	1086	1017	1078	1092	1042	946	936	1219	1048	1066	1060	1053	1169	1132	2778	3269	3086	1811	1634
L1MEj	LINE	L1	40370	178	0.00429256	0.00581002	0.00705036	0.000528446	287.5	278.545	52.6189	3.94395	1257	1456	1300	1376	1202	1222	1217	1151	1142	1128	1141	1171	1083	1067	1141	1248	397	416	385	438	435	384	426	387	345	437	431	471	402	410	437	466	1060	1420	1244	788	638
L1M	LINE	L1	46946	459	0	0.00415853	0.00693319	0.000323614	242	236.832	54.9033	2.56267	1307	1839	1478	1614	1375	1412	1421	1555	1196	1264	1259	1188	1249	1158	1295	1491	557	591	589	571	638	529	544	587	552	593	572	693	645	623	644	660	1764	2031	2181	1265	1177
L1_Mm	LINE	L1	3497766	5429	0.00632054	0.00658479	0.00559784	7.59732e-05	61	70.5887	56.6877	0.769358	69410	104669	71293	83104	62022	68930	61569	73102	52475	67039	54311	65890	55051	60886	54387	74645	25622	28355	27077	27639	27209	28597	29284	27355	24894	28763	27274	31026	27997	28346	30522	28958	66140	78582	75981	49725	39289
L1_Mur1	LINE	L1	4541516	7793	0.00238095	0.0032714	0.00430939	4.88161e-05	143	148.628	54.5275	0.61768	86355	136596	86304	102445	75869	87999	73786	91244	62097	85116	63732	81021	68571	78200	64037	93711	31804	34440	33519	33066	33707	32872	33888	31268	31136	35179	33765	37035	33836	35115	36722	35816	79613	94820	88659	57364	44561
L1_Mur2	LINE	L1	11187770	20769	0.00228571	0.00324716	0.00445345	3.09022e-05	173	175.626	43.8905	0.304553	222645	348605	224179	262175	197941	225366	194578	235508	162984	219567	164457	207304	178244	202423	171014	237718	80878	85921	83718	82329	85351	82425	84415	78475	78981	88231	85014	91784	86076	89289	91867	89767	204574	243746	230181	147968	115401
L1_Mur3	LINE	L1	12768268	27399	0.00246914	0.00349571	0.00460248	2.78051e-05	227	228.659	53.5903	0.323757	229609	358978	243671	284946	210154	228609	215727	246362	170397	228037	177895	211507	191805	202687	188067	244532	91972	104520	101503	96849	103238	96102	97130	88982	95137	107935	101419	108360	103542	108012	110739	109283	229399	271213	251226	158754	124793
L1_Mus1	LINE	L1	22026666	27252	0.00534759	0.00623306	0.00496752	3.00913e-05	70	74.7415	28.3594	0.17179	483414	735548	483840	569282	434076	514084	426135	536798	383357	497484	379260	465067	392778	457756	386345	539282	164603	160162	157635	161537	159131	169388	171584	162107	144288	160774	160381	175049	163859	160403	168823	162748	483294	568556	576274	388202	319877
L1_Mus2	LINE	L1	15963233	21079	0.00417537	0.00501534	0.00496138	3.41725e-05	79	86.6857	35.1765	0.242286	354402	539090	351170	414808	315743	374450	308061	387641	274330	362396	272527	345213	286549	336290	277343	393705	118030	116353	114260	116834	117544	122463	123857	116990	105131	117296	115868	127236	118749	116534	122827	118679	340492	400180	401080	267136	220245
L1_Mus3	LINE	L1	36756625	48489	0.0033389	0.00408912	0.00464662	2.11016e-05	97	106.101	43.3438	0.196836	740267	1137341	737987	863727	656246	773135	637264	796254	564175	741055	564042	704213	600069	699875	575587	810554	254500	261868	253594	258158	261591	265970	271607	254209	235616	263451	259102	283094	261037	262018	277060	267443	714300	846041	822782	546961	443451
L1_Mus4	LINE	L1	8782822	11880	0.0031348	0.00376215	0.00408561	3.74843e-05	103	108.799	35.7079	0.327609	223758	338005	216965	257872	197430	236234	188594	241900	174329	225885	169480	214042	185017	217145	172521	246790	70166	68349	66438	68971	68414	71741	72186	67819	61156	68796	68363	74048	69442	68355	70870	68551	217371	258162	253186	169177	139364
L1P5	LINE	L1	22670	166	0	0.00491024	0.00736731	0.000571814	265	256.03	52.6742	4.08831	616	885	639	754	577	622	666	682	520	616	470	559	541	538	510	690	262	267	234	210	257	183	231	256	231	300	244	256	247	251	291	234	607	776	753	473	377
L1PB4	LINE	L1	48491	144	0.00373321	0.00545807	0.0066116	0.000550967	278	269.854	41.4413	3.45344	975	1316	1055	1222	899	1081	987	1065	744	925	761	825	793	780	752	911	398	427	435	384	413	427	465	387	403	447	441	484	433	416	438	441	1259	1349	1377	774	668
L1_Rod	LINE	L1	4229277	11315	0.00243013	0.00382005	0.0050393	4.73743e-05	254	252.73	44.0057	0.413697	74497	117095	81694	94387	70057	74031	74126	82776	55451	73713	59607	69159	62126	64977	62560	80755	31300	35703	34284	32704	35147	32265	32631	30305	32465	36604	34237	37386	36150	36574	37925	37315	79509	93103	87546	53471	42863
L1VL1	LINE	L1	1989932	1797	0.0063593	0.0141858	0.0155625	0.000367117	119	137.691	62.1407	1.46589	47326	65170	44288	51359	41784	47539	38586	46426	39925	46826	36998	43880	37167	43117	36915	46804	15014	15761	15586	15598	15574	16772	17057	15958	14009	15934	15600	17281	15930	15798	17013	15938	45277	54541	53565	35937	28383
L1VL2	LINE	L1	5301245	4697	0.00341297	0.00402438	0.00405976	5.92365e-05	114	128.855	50.2016	0.732499	98358	147226	101875	119173	89698	104779	89567	108531	78035	99499	81531	97959	81222	92738	79612	109428	36302	37834	37959	37815	38098	40202	41077	38569	35065	38856	37756	43186	38158	38564	41696	39522	111983	133769	128862	84643	68440
L1VL4	LINE	L1	6294336	6091	0.00270027	0.00351056	0.00411141	5.26801e-05	132	144.871	60.1956	0.771294	128287	192465	128549	154050	113738	130522	110958	136514	96233	125661	98663	122431	101516	115270	98361	137596	47005	49258	48299	48409	49149	51067	51508	48031	44875	50693	49341	54325	49794	50315	54208	51388	130435	154837	147613	96974	77174
L2a	LINE	L2	4080014	24277	0.00414938	0.0067754	0.00865562	5.55522e-05	311	304.853	49.401	0.317058	159223	193291	168407	173765	160182	169999	165332	167416	155777	153918	158786	154140	156912	154315	148297	162048	50055	43622	44521	46446	44907	49977	50372	47803	40625	44475	45594	50202	45895	44532	49053	45635	180749	207965	211483	134330	115658
L2b	LINE	L2	1710906	13720	0.00510204	0.0081425	0.0103937	8.87343e-05	313	305.365	58.6871	0.501032	86262	97336	89664	88662	89858	93458	90241	89444	91472	84813	90578	84307	89891	87188	83063	85823	25074	21156	21348	23027	21638	25280	24872	24810	19744	20886	21979	24154	22483	21069	23027	21512	101378	117803	120058	78084	66834
L2c	LINE	L2	1568599	12298	0	0.00682328	0.0092358	8.32832e-05	307	300.451	52.9576	0.477541	69944	84115	73275	75677	71568	75179	72788	72885	69969	67568	71174	67176	70271	69301	65227	70486	21753	19273	19053	20190	19343	21732	21474	20532	17366	18698	19844	21674	19650	18808	20824	19393	79830	92543	93145	60354	50667
L2	LINE	L2	3471264	17614	0.00442478	0.00646513	0.00793718	5.9805e-05	322	314.359	49.3991	0.372212	132650	163169	136685	141338	130613	137872	132045	134426	126770	126536	127585	125842	126885	126558	119492	132127	39156	35605	35643	37116	36333	40401	40775	39171	32687	35368	36864	40927	37465	36308	39559	36617	145843	168826	169002	109434	93043
L3b	LINE	CR1	254669	2304	0	0.00709367	0.0100842	0.000210087	297	291.679	59.8491	1.24686	11881	14192	12443	12010	11660	12159	11780	11632	11601	11331	11758	10980	11611	11542	10927	11377	3300	3178	3152	3352	3196	3485	3473	3365	2838	3173	3228	3701	3235	3124	3393	3170	11603	13410	13359	8709	7506
L3	LINE	CR1	1270917	9732	0	0.00675808	0.00921971	9.34579e-05	302	294.781	60.2723	0.610966	51864	63305	53935	55458	51280	53378	52250	52229	49349	49638	49929	48174	50742	49469	47167	51348	15620	15182	15087	15773	15076	16560	16315	15701	13837	15126	15311	16617	15568	15317	16391	15447	54468	62667	64910	40366	34767
L4_A_Mam	LINE	RTE-X	118314	630	0.00503782	0.00693947	0.00825419	0.000328855	306	298.51	48.925	1.94922	4251	5320	4339	4588	4044	4433	4190	4194	3691	3951	3909	3960	3985	3976	3580	3916	1225	1359	1302	1375	1251	1392	1401	1253	1180	1245	1254	1365	1299	1241	1521	1378	3964	4781	4631	2975	2361
L4_B_Mam	LINE	RTE-X	59341	361	0.0049505	0.00697754	0.00842431	0.000443385	293	282.576	58.0379	3.05462	2007	2623	2119	2331	1892	2133	1993	2105	1774	1977	1858	1761	1894	1858	1668	2044	664	727	666	654	661	681	685	621	637	710	691	784	662	698	705	704	2097	2387	2407	1564	1245
L4_C_Mam	LINE	RTE-X	103210	590	0.00503782	0.00725044	0.00871227	0.000358679	298	286.149	56.3953	2.32176	3329	4292	3678	3677	3278	3465	3294	3433	2926	3149	3175	3245	3278	3221	2994	3301	1103	1145	1148	1133	1087	1186	1169	1069	1010	1146	1171	1232	1154	1101	1233	1143	3243	3787	3828	2384	2001
L5	LINE	RTE-X	22130	122	0.00639507	0.00865109	0.0100707	0.00091176	281	272.951	56.3953	5.10579	664	982	752	834	693	655	709	700	651	704	626	721	634	586	667	667	243	252	219	229	249	259	280	233	222	257	259	284	240	236	277	248	784	873	899	582	443
LFSINE_Vert	SINE	tRNA	122891	1208	0	0.00777016	0.010608	0.000305211	286	278.661	60.8533	1.75086	7286	8446	7735	7159	7076	7099	7123	6858	7310	6724	7376	6885	7241	6551	7172	7041	1717	1497	1658	1688	1581	1856	1783	1718	1411	1636	1645	1844	1606	1493	1674	1627	7300	8608	9432	5661	5147
Looper	DNA	PiggyBac	50074	209	0.00286533	0.00465935	0.0059225	0.000409668	281	275.455	39.1938	2.71109	1126	1557	1246	1339	1118	1137	1310	1289	959	1054	1045	1066	1063	898	1061	1225	435	482	525	443	479	384	398	395	452	461	532	486	444	518	552	546	1342	1485	1577	893	834
LSU-rRNA_Hsa	rRNA	rRNA	70773	481	0.0134529	0.0215432	0.0277974	0.00126745	203	188.83	83.4576	3.80534	17858	17894	16054	19638	22424	20370	20257	21709	36685	28449	31410	27970	33488	34485	34019	25136	1685	1818	1990	2233	1802	2507	2448	2521	1695	1968	2155	2376	2138	1932	2280	2080	4004	6035	6661	3807	3954
LTR101_Mam	LTR	ERVL	37860	157	0.00520833	0.00645024	0.00714346	0.00057011	341	335.968	44.33	3.53792	1619	1836	1488	1532	1495	1444	1469	1318	1604	1344	1571	1270	1585	1321	1575	1304	382	395	374	379	437	416	418	389	376	360	424	422	404	396	430	350	1355	1571	1577	1023	808
LTR102_Mam	LTR	ERVL	46931	215	0.00510204	0.00681052	0.00832241	0.000567584	308	303.563	45.7097	3.11738	1705	2202	1730	1869	1586	1620	1629	1730	1543	1541	1603	1561	1461	1478	1483	1577	499	447	465	459	456	504	481	451	455	485	464	537	431	421	501	448	1675	1946	1842	1250	953
LTR103b_Mam	LTR	ERV1?	9161	57	0.00456621	0.00537359	0.00603089	0.000798811	309	299.965	54.8312	7.26257	362	430	382	401	346	378	328	401	311	349	328	330	315	336	310	369	115	86	79	112	85	99	141	105	114	84	112	109	117	96	96	109	371	385	388	279	221
LTR103_Mam	LTR	ERV1?	10705	58	0.00595259	0.00801202	0.00966073	0.00126852	334.5	333.241	44.6504	5.86289	629	608	649	535	714	476	655	490	717	526	588	481	602	512	700	429	117	108	110	127	118	123	110	104	102	95	124	141	122	122	134	108	376	492	410	317	215
LTR104_Mam	LTR	Gypsy	44605	254	0.00514142	0.00603927	0.00686595	0.000430808	321	315	52.219	3.27651	2289	2466	2159	2068	2117	2059	1987	1999	2090	1988	2159	2033	2056	1998	2126	1980	527	483	496	501	490	524	530	562	481	521	497	515	497	487	556	439	1767	2113	2116	1372	1123
LTR105_Mam	LTR	ERVL	23376	124	0.00565044	0.00716299	0.0079697	0.0007157	333	327.75	44.9521	4.03682	1450	1522	1444	1223	1314	1435	1338	1339	1357	1266	1433	1363	1310	1408	1345	1263	259	238	252	255	245	303	253	326	225	240	273	229	299	230	263	221	1066	1270	1270	891	725
LTR106_Mam	LTR	LTR	37796	164	0.00522197	0.00649018	0.00714999	0.000558321	291	286.616	39.1896	3.06019	841	1084	905	1115	768	849	830	861	611	777	718	762	740	654	773	840	345	388	351	338	404	378	351	306	399	375	395	436	394	376	397	406	811	981	1018	666	482
LTR107_Mam	LTR	LTR	17381	93	0.00492611	0.00640505	0.00715682	0.000742128	300	296.978	42.2464	4.38075	625	797	591	672	526	565	585	556	525	556	476	538	565	502	457	608	206	209	195	180	196	191	170	206	147	183	213	194	197	202	197	202	507	598	669	396	389
LTR108a_Mam	LTR	ERVL	7963	39	0.0047619	0.00695233	0.00692141	0.00110831	297	298.282	41.3477	6.62092	287	372	350	297	285	290	353	304	246	258	304	320	282	264	337	313	88	88	76	107	85	76	89	99	67	77	88	87	112	73	107	92	242	342	290	171	142
LTR108b_Mam	LTR	ERVL	4778	19	0.00330033	0.0049297	0.00623265	0.00142987	319	307.211	61.1579	14.0306	178	242	200	204	153	163	153	159	136	136	129	171	148	158	126	147	45	45	44	37	40	45	46	46	39	51	39	52	22	45	60	54	148	178	167	121	72
LTR108c_Mam	LTR	ERVL	3502	15	0.00319489	0.00591957	0.00794538	0.00205149	323	323.133	39.6806	10.2455	215	244	220	188	251	233	196	193	244	254	216	205	319	268	207	195	36	32	39	34	36	57	40	38	24	38	36	37	51	49	52	37	138	163	111	95	67
LTR108d_Mam	LTR	ERVL	5978	30	0.00421722	0.00607884	0.0071916	0.001313	320.5	309.533	51.0035	9.31193	254	332	266	245	251	240	196	253	230	234	222	245	214	231	195	239	76	67	55	52	51	59	70	69	39	69	46	76	52	62	56	77	191	204	197	149	150
LTR108e_Mam	LTR	ERVL	7597	36	0.00278539	0.00478243	0.00547383	0.000912305	321	312.528	43.2716	7.21193	245	331	262	279	244	251	235	268	206	229	229	259	188	253	225	245	87	81	76	108	78	79	79	74	60	87	59	91	79	66	88	81	222	288	309	192	148
LTR109A2	LTR	ERV1	5614	37	0.00699301	0.00729849	0.00670106	0.00110165	304	300.297	46.0289	7.5671	172	213	183	159	166	160	207	180	169	140	175	132	177	125	146	170	75	62	70	76	56	61	62	38	74	89	85	91	80	74	63	66	225	199	243	108	103
LTR10_RN	LTR	ERVK	137156	546	0.00522193	0.00704702	0.0081936	0.000350654	188	189.903	50.9388	2.17998	5326	6550	5687	5519	5195	5634	5426	5717	5122	5321	5349	5342	4859	4997	5098	5334	1469	1321	1242	1508	1311	1636	1537	1464	1298	1330	1413	1472	1436	1317	1510	1294	5230	6071	6144	3830	3272
LTR16A1	LTR	ERVL	130654	654	0.00515478	0.00657122	0.0072132	0.000282058	320	315.537	44.2726	1.7312	5729	6763	5579	5751	5372	6054	5096	5614	5397	5268	5191	5165	5331	5376	4671	5459	1547	1221	1302	1400	1335	1501	1480	1520	1205	1274	1359	1549	1366	1260	1430	1296	5583	6784	6619	4473	3570
LTR16A2	LTR	ERVL	85178	416	0.00461896	0.00643984	0.00754254	0.000369803	313.5	309.623	41.3165	2.02571	3573	4401	3494	3692	3393	3710	3374	3550	3370	3395	3435	3402	3222	3469	3311	3599	881	845	824	843	851	926	982	871	796	815	840	895	903	862	913	791	3274	3704	3764	2427	2148
LTR16A	LTR	ERVL	310455	1472	0.00506333	0.0065768	0.00714842	0.000186319	343.5	340.95	42.8401	1.1166	13986	16349	13882	14183	13018	13949	12927	13523	13216	12842	13038	12861	12709	12970	12241	13206	3642	3177	3117	3417	3183	3778	3537	3579	2865	3049	3205	3545	3255	3100	3398	3036	13865	15864	16626	10843	8851
LTR16B1	LTR	ERVL	69563	299	0.00552486	0.00705878	0.0076258	0.000441011	333	329.505	43.2616	2.50188	3064	3752	3049	2999	2659	3101	2939	3005	2786	2866	2740	2721	2663	2855	2573	2999	740	645	657	713	696	776	764	763	557	646	685	770	644	609	805	672	2801	3434	3392	2165	1940
LTR16B2	LTR	ERVL	85473	384	0.00519484	0.00675958	0.00770547	0.000393218	331	329.935	42.9427	2.19141	3667	4240	3534	3532	3417	3705	3405	3641	3353	3467	3388	3386	3451	3402	3096	3433	999	818	854	883	837	931	958	974	738	823	864	1005	908	879	912	827	3557	4229	4315	2827	2477
LTR16B	LTR	ERVL	55811	260	0.00521556	0.00649722	0.00694642	0.000430799	332	329.377	41.5845	2.57896	2498	2796	2646	2375	2284	2391	2293	2305	2387	2154	2370	2242	2242	2125	2295	2326	596	504	635	565	607	642	653	628	499	593	568	638	596	551	601	578	2276	2828	2702	1734	1571
LTR16C	LTR	ERVL	270921	1352	0.00558659	0.00689997	0.00745871	0.00020285	333	328.371	44.9777	1.22323	11188	13332	11462	11505	10943	12045	10650	11041	10832	10969	10403	10622	10529	10678	9995	11015	3039	2746	2716	2861	2730	3225	3183	3109	2364	2661	2713	3107	2724	2620	2815	2708	11250	13252	13419	8673	7472
LTR16D1	LTR	ERVL	17413	90	0.00371825	0.00671123	0.00980676	0.00103372	326	320.344	56.2131	5.92538	711	820	792	797	689	802	716	684	707	755	728	753	609	638	677	682	220	158	199	187	182	233	180	176	166	173	164	215	185	183	176	191	809	934	974	606	570
LTR16D2	LTR	ERVL	10868	65	0.00606061	0.00722725	0.00804567	0.000997942	315	313.723	51.6241	6.40318	460	601	435	561	482	545	452	548	412	499	439	503	427	515	376	537	163	120	142	126	160	131	147	152	93	127	129	125	141	117	114	150	475	604	587	400	353
LTR16D	LTR	ERVL	36602	185	0.00625	0.00717148	0.00729904	0.000536636	331	324.908	47.7442	3.51022	1598	1851	1513	1662	1436	1721	1479	1551	1573	1493	1546	1489	1380	1498	1330	1544	437	415	357	404	361	468	440	450	333	378	412	447	399	348	365	397	1654	1889	1923	1297	1090
[truncated: 987 more rows]
[truncated: 69 more columns]
