# Supplementary material for: Distinct contributions of DNA methylation and histone acetylation to the genomic occupancy of transcription factors
Source: HighWire-hosted journal article supplement (doi:10.1101/gr.257576.119), 2020-09-22
Supplement: Supplemental_Table_S4.xlsx [file Supplemental_Table_S4.xlsx]

## Sheet: Sheet1
# Results of differential gene expression analyses
# Differential analysis performed with edgeR, Significance was called with an "FDR" value < 10^-5
Geneid	Chr	Start	End	Strand	Length	Comparison	logFC	logCPM	LR	PValue	FDR	Significant	Status
0610005C13Rik	chr7	45567795	45575176	-	1122	TKO.DMSO.vs.J1.DMSO	0.193614	-0.152402	0.087198	0.76777	0.874252	FALSE	NoSigChange
0610007N19Rik	chr15	32240568	32244662	-	1483	TKO.DMSO.vs.J1.DMSO	-0.576224	1.08123	1.66472	0.196967	0.378277	FALSE	NoSigChange
0610007P14Rik	chr12	85815455	85824545	-	1185	TKO.DMSO.vs.J1.DMSO	-0.146903	5.58912	1.56389	0.211097	0.396811	FALSE	NoSigChange
0610009B22Rik	chr11	51685385	51688634	-	795	TKO.DMSO.vs.J1.DMSO	0.115563	5.12575	0.558965	0.454678	0.649991	FALSE	NoSigChange
0610009D07Rik	chr12	4817608	4827659	+	1116	TKO.DMSO.vs.J1.DMSO	-0.134401	6.79719	1.50198	0.220367	0.408977	FALSE	NoSigChange
0610009L18Rik	chr11	120348678	120351190	+	619	TKO.DMSO.vs.J1.DMSO	0.812997	0.723347	5.8824	0.0152929	0.0582118	FALSE	NoSigChange
0610009O20Rik	chr18	38250249	38262629	+	2404	TKO.DMSO.vs.J1.DMSO	-0.11092	5.41224	0.766537	0.38129	0.580981	FALSE	NoSigChange
0610010F05Rik	chr11	23573776	23633631	-	4140	TKO.DMSO.vs.J1.DMSO	0.185499	6.26413	1.56577	0.210822	0.396679	FALSE	NoSigChange
0610010K14Rik	chr11	70235204	70237914	-	913	TKO.DMSO.vs.J1.DMSO	-0.142765	4.66127	1.09955	0.294365	0.494518	FALSE	NoSigChange
0610011F06Rik	chr17	25875500	25877163	+	811	TKO.DMSO.vs.J1.DMSO	0.306679	4.04482	3.54979	0.059553	0.162932	FALSE	NoSigChange
0610012G03Rik	chr16	31947051	31948521	-	1471	TKO.DMSO.vs.J1.DMSO	-0.222885	4.25005	1.88828	0.169396	0.341168	FALSE	NoSigChange
0610030E20Rik	chr6	72347317	72353160	+	4634	TKO.DMSO.vs.J1.DMSO	-0.108383	3.77158	0.390733	0.531915	0.715013	FALSE	NoSigChange
0610031J06Rik	chr3	88325023	88328631	+	1537	TKO.DMSO.vs.J1.DMSO	0.0167366	5.46591	0.0159449	0.899516	0.950182	FALSE	NoSigChange
0610037L13Rik	chr4	107889899	107897802	+	1551	TKO.DMSO.vs.J1.DMSO	-0.153274	4.94814	1.1294	0.287903	0.488334	FALSE	NoSigChange
0610038B21Rik	chr8	77517056	77518578	+	1523	TKO.DMSO.vs.J1.DMSO	-1.08372	-0.0856341	3.11697	0.077481	0.197557	FALSE	NoSigChange
0610039K10Rik	chr2	163644850	163645800	+	951	TKO.DMSO.vs.J1.DMSO	0.845061	0.0908249	3.54683	0.0596594	0.163099	FALSE	NoSigChange
0610040B10Rik	chr5	143329308	143332704	+	440	TKO.DMSO.vs.J1.DMSO	0.000663304	0.533254	2.32938e-06	0.998782	0.999373	FALSE	NoSigChange
0610040F04Rik	chr6	108577039	108660934	-	2390	TKO.DMSO.vs.J1.DMSO	-0.0684962	0.983278	0.0274162	0.868489	0.934021	FALSE	NoSigChange
0610040J01Rik	chr5	63812495	63899619	+	1870	TKO.DMSO.vs.J1.DMSO	-0.224852	3.19925	0.386685	0.534047	0.716993	FALSE	NoSigChange
1110001A16Rik	chr17	78916499	78921048	+	1513	TKO.DMSO.vs.J1.DMSO	-0.193214	5.32139	1.58513	0.208024	0.392976	FALSE	NoSigChange
1110001J03Rik	chr6	38534861	38539449	+	441	TKO.DMSO.vs.J1.DMSO	0.113718	3.82789	0.365136	0.545668	0.726598	FALSE	NoSigChange
1110002L01Rik	chr12	3403883	3426747	-	3300	TKO.DMSO.vs.J1.DMSO	-0.605405	5.39798	17.0969	3.55211e-05	0.000367166	FALSE	NoSigChange
1110004E09Rik	chr16	90925811	90934849	-	1163	TKO.DMSO.vs.J1.DMSO	-0.279499	4.34351	3.5237	0.0604974	0.164621	FALSE	NoSigChange
1110004F10Rik	chr7	116093380	116105210	+	1400	TKO.DMSO.vs.J1.DMSO	-0.0696477	7.18215	0.343894	0.55759	0.735688	FALSE	NoSigChange
1110007C09Rik	chr13	49202951	49216026	-	804	TKO.DMSO.vs.J1.DMSO	-0.268145	2.88432	1.36792	0.24217	0.436096	FALSE	NoSigChange
1110008F13Rik	chr2	156863122	156873562	+	1050	TKO.DMSO.vs.J1.DMSO	-0.0370066	7.18585	0.113327	0.736388	0.856653	FALSE	NoSigChange
1110008J03Rik	chr5	120609060	120612589	-	1666	TKO.DMSO.vs.J1.DMSO	-0.0940958	4.36613	0.336903	0.561622	0.739278	FALSE	NoSigChange
1110008L16Rik	chr12	55302637	55382491	+	3117	TKO.DMSO.vs.J1.DMSO	0.069141	5.89496	0.369666	0.543186	0.724724	FALSE	NoSigChange
1110008P14Rik	chr2	32379101	32381915	-	657	TKO.DMSO.vs.J1.DMSO	-0.0187289	4.33756	0.0113275	0.915241	0.957946	FALSE	NoSigChange
1110012L19Rik	chrX	70385913	70389416	+	1057	TKO.DMSO.vs.J1.DMSO	-0.352237	4.50927	4.89677	0.026907	0.0902753	FALSE	NoSigChange
1110018G07Rik	chr12	84918149	84970886	-	5433	TKO.DMSO.vs.J1.DMSO	-0.148039	6.33524	1.51356	0.218597	0.406783	FALSE	NoSigChange
1110019D14Rik	chr6	13871569	13896421	+	1498	TKO.DMSO.vs.J1.DMSO	0.0500847	3.43598	0.0356307	0.85028	0.923904	FALSE	NoSigChange
1110032A03Rik	chr9	50762828	50768152	-	1782	TKO.DMSO.vs.J1.DMSO	-0.644738	2.39035	5.12763	0.0235478	0.0813909	FALSE	NoSigChange
1110032F04Rik	chr3	68869586	68872163	+	2578	TKO.DMSO.vs.J1.DMSO	0.667704	2.04104	5.40196	0.0201141	0.0718558	FALSE	NoSigChange
1110034G24Rik	chr2	132690283	132751055	+	1471	TKO.DMSO.vs.J1.DMSO	-0.0640375	3.00382	0.123051	0.725749	0.849796	FALSE	NoSigChange
1110037F02Rik	chr4	11485958	11551143	+	7115	TKO.DMSO.vs.J1.DMSO	-0.0404526	7.67008	0.157562	0.691411	0.828975	FALSE	NoSigChange
1110038B12Rik	chr17	34950236	34952471	-	589	TKO.DMSO.vs.J1.DMSO	-0.0415527	5.25048	0.0962753	0.756346	0.868716	FALSE	NoSigChange
1110038F14Rik	chr15	76948544	76950731	+	1091	TKO.DMSO.vs.J1.DMSO	-0.301765	5.02386	4.7288	0.0296616	0.0972871	FALSE	NoSigChange
1110051M20Rik	chr2	91277828	91444642	-	1979	TKO.DMSO.vs.J1.DMSO	-0.792726	3.29257	15.1504	9.92776e-05	0.000894203	FALSE	NoSigChange
1110054M08Rik	chr16	24392556	24393655	-	854	TKO.DMSO.vs.J1.DMSO	-1.14149	-0.179646	4.27875	0.0385916	0.118436	FALSE	NoSigChange
1110057K04Rik	chr12	8208107	8285759	+	3082	TKO.DMSO.vs.J1.DMSO	-0.527951	5.50199	16.6694	4.44939e-05	0.000447349	FALSE	NoSigChange
1110058L19Rik	chr1	23995939	24005640	-	667	TKO.DMSO.vs.J1.DMSO	0.452482	4.26713	7.69123	0.00554897	0.0260779	FALSE	NoSigChange
1110059E24Rik	chr19	21597313	21652791	-	1428	TKO.DMSO.vs.J1.DMSO	0.238297	5.68127	2.59768	0.107021	0.247718	FALSE	NoSigChange
1110059G10Rik	chr9	122945089	122951000	-	3361	TKO.DMSO.vs.J1.DMSO	0.102001	3.34578	0.205984	0.649934	0.8008	FALSE	NoSigChange
1110065P20Rik	chr4	124849485	124850730	-	762	TKO.DMSO.vs.J1.DMSO	-0.594754	3.97588	10.2164	0.00139199	0.00843506	FALSE	NoSigChange
1190002F15Rik	chr6	134929092	134951718	+	607	TKO.DMSO.vs.J1.DMSO	0.330083	1.66116	1.10141	0.293957	0.49417	FALSE	NoSigChange
1190002N15Rik	chr9	94517864	94538081	-	3950	TKO.DMSO.vs.J1.DMSO	0.0340299	5.80386	0.0755986	0.783353	0.883741	FALSE	NoSigChange
1190003J15Rik	chr7	140835496	140837968	+	675	TKO.DMSO.vs.J1.DMSO	0.60201	4.32992	15.6299	7.70284e-05	0.000717581	FALSE	NoSigChange
1190005I06Rik	chr8	120608602	120634382	-	734	TKO.DMSO.vs.J1.DMSO	-0.593386	3.96016	5.17585	0.0229029	0.0796683	FALSE	NoSigChange
1190007I07Rik	chr10	82619851	82623228	-	748	TKO.DMSO.vs.J1.DMSO	-0.962171	2.62116	19.3269	1.10142e-05	0.000133806	FALSE	NoSigChange
1200011I18Rik	chr14	76086232	76110815	-	5448	TKO.DMSO.vs.J1.DMSO	0.0814144	6.71908	0.454002	0.500441	0.689073	FALSE	NoSigChange
1200014J11Rik	chr11	73047867	73083579	+	6284	TKO.DMSO.vs.J1.DMSO	0.799827	6.98482	49.4734	2.01084e-12	1.07025e-10	TRUE	SigIncrease
1300002E11Rik	chr16	21794347	21809039	+	3959	TKO.DMSO.vs.J1.DMSO	0.399989	2.75373	2.74036	0.0978427	0.233296	FALSE	NoSigChange
1300002K09Rik	chr4	45848947	45887008	+	3606	TKO.DMSO.vs.J1.DMSO	-0.103419	0.178607	0.0504734	0.822241	0.908878	FALSE	NoSigChange
1300015D01Rik	chr2	173124749	173133204	+	3476	TKO.DMSO.vs.J1.DMSO	1.97213	-0.0343127	10.0253	0.00154406	0.00919552	FALSE	NoSigChange
1300017J02Rik	chr9	103250530	103288297	-	2275	TKO.DMSO.vs.J1.DMSO	0.235711	0.748005	0.191078	0.662021	0.809485	FALSE	NoSigChange
1300018J18Rik	chr15	89089107	89100340	+	2360	TKO.DMSO.vs.J1.DMSO	-0.115952	3.29118	0.234271	0.628375	0.785963	FALSE	NoSigChange
1500004A13Rik	chr3	88822010	88832487	-	3629	TKO.DMSO.vs.J1.DMSO	-1.52017	0.153032	11.383	0.000741198	0.00490971	FALSE	NoSigChange
1500009C09Rik	chr15	82252397	82260753	+	1904	TKO.DMSO.vs.J1.DMSO	1.00987	0.114552	5.33002	0.0209612	0.0743409	FALSE	NoSigChange
1500009L16Rik	chr10	83722865	83762762	+	1194	TKO.DMSO.vs.J1.DMSO	2.69756e-05	5.55003	4.80766e-08	0.999825	1	FALSE	NoSigChange
1500011B03Rik	chr5	114808196	114813976	-	1739	TKO.DMSO.vs.J1.DMSO	0.271982	4.66925	3.25129	0.0713674	0.185988	FALSE	NoSigChange
1500011K16Rik	chr2	127791377	127792488	-	811	TKO.DMSO.vs.J1.DMSO	-0.259317	3.43596	2.11796	0.145581	0.306547	FALSE	NoSigChange
1500012F01Rik	chr2	167062934	167065862	+	738	TKO.DMSO.vs.J1.DMSO	-0.234026	5.7555	4.28507	0.0384484	0.118077	FALSE	NoSigChange
1500015A07Rik	chr18	61726390	61728253	+	1864	TKO.DMSO.vs.J1.DMSO	-0.217266	3.85484	1.35705	0.244049	0.438158	FALSE	NoSigChange
1500015O10Rik	chr1	43730602	43742564	+	888	TKO.DMSO.vs.J1.DMSO	-1.63449	0.113837	9.26436	0.00233656	0.0129382	FALSE	NoSigChange
1500032L24Rik	chr15	82346046	82349062	+	585	TKO.DMSO.vs.J1.DMSO	-0.101025	5.64959	0.741227	0.389268	0.588425	FALSE	NoSigChange
1600002H07Rik	chr17	24215056	24220769	-	2143	TKO.DMSO.vs.J1.DMSO	-0.195398	4.94943	2.21405	0.136759	0.293659	FALSE	NoSigChange
1600002K03Rik	chr10	80172944	80175119	+	651	TKO.DMSO.vs.J1.DMSO	-0.118448	2.41253	0.266896	0.605421	0.770159	FALSE	NoSigChange
1600012H06Rik	chr17	14943184	14945939	+	2756	TKO.DMSO.vs.J1.DMSO	-0.145041	5.48908	0.775485	0.378525	0.578215	FALSE	NoSigChange
1600014C10Rik	chr7	38183217	38197565	+	3450	TKO.DMSO.vs.J1.DMSO	0.287773	4.51315	3.22536	0.0725057	0.187989	FALSE	NoSigChange
1600014K23Rik	chrX	85249677	85270291	+	840	TKO.DMSO.vs.J1.DMSO	-0.0209621	0.478842	0.00130093	0.971228	0.986589	FALSE	NoSigChange
1600016N20Rik	chr7	141210043	141214080	-	2047	TKO.DMSO.vs.J1.DMSO	-0.43535	2.18938	2.49272	0.114374	0.259424	FALSE	NoSigChange
1600020E01Rik	chr6	86527330	86564449	+	681	TKO.DMSO.vs.J1.DMSO	-0.113436	2.51966	0.231303	0.630559	0.787459	FALSE	NoSigChange
1600023N17Rik	chr5	45668701	45669708	-	1008	TKO.DMSO.vs.J1.DMSO	-0.141138	0.569093	0.11436	0.735234	0.85587	FALSE	NoSigChange
1600029D21Rik	chr9	50494525	50505639	+	1846	TKO.DMSO.vs.J1.DMSO	0.457697	3.48211	2.34025	0.126069	0.278402	FALSE	NoSigChange
1700001C19Rik	chr17	47412734	47437375	-	1801	TKO.DMSO.vs.J1.DMSO	0.699305	0.687384	1.8456	0.174295	0.348271	FALSE	NoSigChange
1700001G11Rik	chr14	66295329	66297129	-	769	TKO.DMSO.vs.J1.DMSO	0.513087	0.135245	0.620648	0.430806	0.628196	FALSE	NoSigChange
1700001L05Rik	chr15	83353847	83367297	-	6003	TKO.DMSO.vs.J1.DMSO	0.676968	6.41395	11.2225	0.000808097	0.00527029	FALSE	NoSigChange
1700001L19Rik	chr13	68597439	68614231	+	1808	TKO.DMSO.vs.J1.DMSO	0.0444578	-0.0355713	0.00418504	0.948419	0.974657	FALSE	NoSigChange
1700001O22Rik	chr2	30795563	30803664	-	1591	TKO.DMSO.vs.J1.DMSO	0.862383	0.572526	4.89123	0.0269935	0.0904655	FALSE	NoSigChange
1700001P01Rik	chr11	97771481	97775918	-	624	TKO.DMSO.vs.J1.DMSO	0.630791	0.768818	3.37838	0.066057	0.175729	FALSE	NoSigChange
1700003E16Rik	chr6	83156404	83162975	+	2050	TKO.DMSO.vs.J1.DMSO	1.68686	-0.378119	1.66117	0.197446	0.378815	FALSE	NoSigChange
1700003M02Rik	chr4	34711332	34730206	-	1716	TKO.DMSO.vs.J1.DMSO	2.16832	1.50241	27.682	1.42989e-07	2.80125e-06	TRUE	SigIncrease
1700003M07Rik	chr4	129960374	129965138	+	2315	TKO.DMSO.vs.J1.DMSO	0.55157	1.84831	2.33022	0.126884	0.279796	FALSE	NoSigChange
1700007K13Rik	chr2	28462001	28466324	-	804	TKO.DMSO.vs.J1.DMSO	0.810294	3.30811	11.0161	0.00090323	0.0058086	FALSE	NoSigChange
1700007L15Rik	chr16	33379854	33380736	-	747	TKO.DMSO.vs.J1.DMSO	0.206859	2.65292	0.666682	0.414211	0.612801	FALSE	NoSigChange
1700008I05Rik	chrX	135654698	135693790	-	1776	TKO.DMSO.vs.J1.DMSO	0.239769	1.97168	0.190727	0.662313	0.80966	FALSE	NoSigChange
1700008J07Rik	chr7	127510438	127512869	-	2432	TKO.DMSO.vs.J1.DMSO	0.287007	2.1376	1.02566	0.31118	0.511536	FALSE	NoSigChange
1700008O03Rik	chr7	44360045	44375030	-	911	TKO.DMSO.vs.J1.DMSO	0.743189	1.5582	6.06364	0.0137993	0.0537633	FALSE	NoSigChange
1700010D01Rik	chrX	95732590	95733261	-	499	TKO.DMSO.vs.J1.DMSO	-3.29748	-0.67893	2.89064	0.0890954	0.218227	FALSE	NoSigChange
1700010I14Rik	chr17	8988333	9008319	+	1878	TKO.DMSO.vs.J1.DMSO	-1.05619	0.324479	5.56027	0.0183726	0.0668422	FALSE	NoSigChange
1700011J10Rik	chr2	72979432	72989249	+	1147	TKO.DMSO.vs.J1.DMSO	0.885677	2.36213	9.85852	0.00169047	0.00987427	FALSE	NoSigChange
1700012B07Rik	chr11	109788291	109828046	-	1470	TKO.DMSO.vs.J1.DMSO	0.16087	0.0926001	0.0303863	0.861617	0.929915	FALSE	NoSigChange
1700012B15Rik	chr12	3235791	3250374	+	1073	TKO.DMSO.vs.J1.DMSO	-0.0771918	3.06783	0.105915	0.744844	0.861382	FALSE	NoSigChange
1700012D01Rik	chr10	127667123	127668851	+	695	TKO.DMSO.vs.J1.DMSO	1.28977	-0.0835026	6.57036	0.0103691	0.0426822	FALSE	NoSigChange
1700012D14Rik	chr7	111117673	111122675	-	629	TKO.DMSO.vs.J1.DMSO	0.00993082	0.422569	0.000678285	0.979222	0.991006	FALSE	NoSigChange
1700013H16Rik	chrX	53742901	53757831	-	1224	TKO.DMSO.vs.J1.DMSO	4.35424	5.1037	44.316	2.79419e-11	1.21523e-09	TRUE	SigIncrease
1700016K19Rik	chr11	75999912	76003569	+	921	TKO.DMSO.vs.J1.DMSO	0.491559	1.37061	1.3815	0.239845	0.432881	FALSE	NoSigChange
1700017B05Rik	chr9	57252322	57262599	-	4934	TKO.DMSO.vs.J1.DMSO	-0.331663	5.45525	5.81151	0.0159216	0.0599457	FALSE	NoSigChange
1700018B08Rik	chr8	121530784	121541954	-	1080	TKO.DMSO.vs.J1.DMSO	2.96042	0.163859	14.9046	0.000113084	0.000998473	FALSE	NoSigChange
1700018B24Rik	chr3	48605731	48609100	-	3370	TKO.DMSO.vs.J1.DMSO	4.73711	3.49706	134.778	3.69248e-31	1.06051e-28	TRUE	SigIncrease
1700019A02Rik	chr1	53158577	53187617	-	627	TKO.DMSO.vs.J1.DMSO	0.2722	1.84541	0.445139	0.504653	0.69243	FALSE	NoSigChange
1700019B21Rik	chrX	62510539	62527011	-	778	TKO.DMSO.vs.J1.DMSO	7.66117	1.33529	52.0671	5.36358e-13	3.16451e-11	TRUE	SigIncrease
1700019D03Rik	chr1	52925127	52952840	-	834	TKO.DMSO.vs.J1.DMSO	0.380226	4.46313	7.30745	0.00686695	0.0307799	FALSE	NoSigChange
1700019E08Rik	chr2	45696605	45698447	+	635	TKO.DMSO.vs.J1.DMSO	3.06701	1.63787	55.4317	9.6763e-14	6.26777e-12	TRUE	SigIncrease
1700019G17Rik	chr6	85899050	85904938	-	3278	TKO.DMSO.vs.J1.DMSO	0.632857	3.26333	8.88425	0.00287641	0.0153631	FALSE	NoSigChange
1700019N19Rik	chr19	58785803	58794414	-	923	TKO.DMSO.vs.J1.DMSO	2.45643	-0.241436	4.42859	0.0353417	0.110694	FALSE	NoSigChange
1700020I14Rik	chr2	119594296	119600744	+	1549	TKO.DMSO.vs.J1.DMSO	0.0927753	5.33148	0.489987	0.483933	0.676751	FALSE	NoSigChange
1700020N01Rik	chr10	21593145	21622375	+	1061	TKO.DMSO.vs.J1.DMSO	-0.506014	0.721208	0.892751	0.344733	0.54656	FALSE	NoSigChange
1700021F05Rik	chr10	43525121	43540994	-	898	TKO.DMSO.vs.J1.DMSO	0.039075	5.11557	0.0540627	0.816139	0.904629	FALSE	NoSigChange
1700021K19Rik	chr16	32821702	32868366	-	5343	TKO.DMSO.vs.J1.DMSO	-0.00106889	5.6249	6.67111e-05	0.993483	0.99646	FALSE	NoSigChange
1700022P22Rik	chr1	191036822	191042941	+	428	TKO.DMSO.vs.J1.DMSO	0.263942	0.95355	0.507576	0.47619	0.669558	FALSE	NoSigChange
1700023E05Rik	chr5	77016023	77061522	+	1719	TKO.DMSO.vs.J1.DMSO	-4.99216	-0.699291	9.81744	0.00172864	0.0100586	FALSE	NoSigChange
1700024P16Rik	chr4	104913456	105016863	+	3136	TKO.DMSO.vs.J1.DMSO	-0.914132	0.400985	1.32073	0.250462	0.445597	FALSE	NoSigChange
1700025E21Rik	chr6	30509849	30520253	+	1597	TKO.DMSO.vs.J1.DMSO	-0.0132615	0.393534	0.0010087	0.974663	0.988495	FALSE	NoSigChange
1700025G04Rik	chr1	151884524	152090320	-	9754	TKO.DMSO.vs.J1.DMSO	-0.424767	4.44106	5.9319	0.0148692	0.0568832	FALSE	NoSigChange
1700028B04Rik	chr7	28496941	28497492	+	552	TKO.DMSO.vs.J1.DMSO	-0.0755492	1.578	0.0340912	0.853513	0.926093	FALSE	NoSigChange
1700028E10Rik	chr5	151368675	151414083	+	2718	TKO.DMSO.vs.J1.DMSO	1.05327	0.883266	5.53405	0.0186499	0.0676408	FALSE	NoSigChange
1700028I16Rik	chr10	82812123	82824242	+	1056	TKO.DMSO.vs.J1.DMSO	0.515487	0.69554	0.771191	0.379849	0.579513	FALSE	NoSigChange
1700028K03Rik	chr5	107534711	107551542	+	3253	TKO.DMSO.vs.J1.DMSO	1.31205	0.63492	3.93222	0.0473694	0.137738	FALSE	NoSigChange
1700029J07Rik	chr8	45953606	45975252	-	2740	TKO.DMSO.vs.J1.DMSO	-0.375035	1.57784	0.63277	0.426341	0.624376	FALSE	NoSigChange
1700029M20Rik	chr4	135626655	135630198	+	2963	TKO.DMSO.vs.J1.DMSO	1.06694	-0.3754	2.64291	0.104013	0.243058	FALSE	NoSigChange
1700029P11Rik	chr15	81980540	81981563	+	1024	TKO.DMSO.vs.J1.DMSO	0.0764659	2.61891	0.0862571	0.768991	0.875052	FALSE	NoSigChange
1700030C10Rik	chr12	20804392	20815779	-	1724	TKO.DMSO.vs.J1.DMSO	-0.019799	3.36508	0.00576065	0.9395	0.970616	FALSE	NoSigChange
1700030J22Rik	chr8	116969599	116978943	-	2971	TKO.DMSO.vs.J1.DMSO	-0.0865855	2.35462	0.0997592	0.752119	0.866185	FALSE	NoSigChange
1700030K09Rik	chr8	72443880	72460541	+	2427	TKO.DMSO.vs.J1.DMSO	-0.301213	4.40636	2.65257	0.103383	0.241966	FALSE	NoSigChange
1700034F02Rik	chr11	29547950	29578352	+	2185	TKO.DMSO.vs.J1.DMSO	0.108721	1.61296	0.0836437	0.772419	0.876928	FALSE	NoSigChange
1700037C18Rik	chr16	3905798	3908689	-	1097	TKO.DMSO.vs.J1.DMSO	0.0727922	0.746704	0.0336634	0.854425	0.9262	FALSE	NoSigChange
1700037H04Rik	chr2	131146325	131160020	-	1241	TKO.DMSO.vs.J1.DMSO	0.353326	5.19832	6.84085	0.00890966	0.0378517	FALSE	NoSigChange
1700042O10Rik	chr11	11868123	11885321	+	1075	TKO.DMSO.vs.J1.DMSO	0.815532	-0.15913	3.08215	0.0791558	0.200369	FALSE	NoSigChange
1700048O20Rik	chr9	121937275	121947016	+	1848	TKO.DMSO.vs.J1.DMSO	2.59736	2.01552	26.2341	3.02436e-07	5.52663e-06	TRUE	SigIncrease
1700049G17Rik	chr7	27907392	27929430	-	5158	TKO.DMSO.vs.J1.DMSO	-0.0543319	3.26718	0.0754683	0.783535	0.883741	FALSE	NoSigChange
1700052K11Rik	chr11	105179021	105181433	-	2413	TKO.DMSO.vs.J1.DMSO	-0.128065	3.5432	0.278778	0.597503	0.76443	FALSE	NoSigChange
1700052N19Rik	chr10	4432605	4455140	+	2290	TKO.DMSO.vs.J1.DMSO	-0.174486	5.88489	1.84322	0.174574	0.348643	FALSE	NoSigChange
1700061G19Rik	chr17	56875633	56888838	+	2455	TKO.DMSO.vs.J1.DMSO	0.302498	3.79266	2.88595	0.0893554	0.218641	FALSE	NoSigChange
1700066B19Rik	chr18	35726989	35730869	+	2504	TKO.DMSO.vs.J1.DMSO	-0.635718	-0.0238565	1.08448	0.297697	0.497754	FALSE	NoSigChange
1700066M21Rik	chr1	57377620	57385422	+	3007	TKO.DMSO.vs.J1.DMSO	0.353606	4.52396	2.39168	0.121983	0.271936	FALSE	NoSigChange
1700067K01Rik	chr8	84001706	84004770	+	1084	TKO.DMSO.vs.J1.DMSO	-0.0454494	0.933906	0.0143006	0.904812	0.952625	FALSE	NoSigChange
1700080O16Rik	chrX	51968695	51972772	-	1454	TKO.DMSO.vs.J1.DMSO	9.34364	3.38187	153.214	3.43909e-35	1.30875e-32	TRUE	SigIncrease
1700084J12Rik	chr15	33405209	33405939	-	731	TKO.DMSO.vs.J1.DMSO	0.585438	-0.0970782	1.30794	0.252769	0.448234	FALSE	NoSigChange
1700086L19Rik	chr12	74284276	74295950	+	1046	TKO.DMSO.vs.J1.DMSO	0	-0.186601	0	1	1	FALSE	NoSigChange
1700086O06Rik	chr18	38238405	38250565	-	1931	TKO.DMSO.vs.J1.DMSO	-0.49706	2.69516	3.77141	0.0521356	0.147813	FALSE	NoSigChange
1700088E04Rik	chr15	79134655	79141251	-	1253	TKO.DMSO.vs.J1.DMSO	-0.932234	0.0944329	1.43574	0.23083	0.421474	FALSE	NoSigChange
1700094D03Rik	chr3	90062796	90068347	+	3097	TKO.DMSO.vs.J1.DMSO	-0.258668	2.51892	0.980942	0.321966	0.523161	FALSE	NoSigChange
1700096K18Rik	chr5	25530018	25531466	+	1449	TKO.DMSO.vs.J1.DMSO	0.943053	1.10035	4.24998	0.0392508	0.119782	FALSE	NoSigChange
1700097N02Rik	chr17	30622441	30626905	-	845	TKO.DMSO.vs.J1.DMSO	-0.690202	-0.0505766	2.74459	0.0975841	0.232935	FALSE	NoSigChange
1700101E01Rik	chr2	28955481	29055066	-	1295	TKO.DMSO.vs.J1.DMSO	0.130689	0.692655	0.141352	0.706941	0.837632	FALSE	NoSigChange
1700102P08Rik	chr9	108392834	108397767	+	1098	TKO.DMSO.vs.J1.DMSO	-0.627928	0.545505	3.29667	0.0694206	0.182287	FALSE	NoSigChange
1700106J16Rik	chr11	88294043	88295261	+	1219	TKO.DMSO.vs.J1.DMSO	0.62269	0.152363	0.990088	0.319721	0.520457	FALSE	NoSigChange
1700108F19Rik	chr14	76677568	76687108	+	868	TKO.DMSO.vs.J1.DMSO	2.3111	1.0647	8.96984	0.00274472	0.0147947	FALSE	NoSigChange
1700109H08Rik	chr5	3571716	3584341	+	715	TKO.DMSO.vs.J1.DMSO	-0.130623	2.12403	0.170965	0.679256	0.821649	FALSE	NoSigChange
1700112H15Rik	chr1	184527841	184557691	-	778	TKO.DMSO.vs.J1.DMSO	3.73464	-0.315886	3.86425	0.0493251	0.141726	FALSE	NoSigChange
1700113A16Rik	chr3	88171560	88177785	-	983	TKO.DMSO.vs.J1.DMSO	-0.264409	0.872686	0.449809	0.502426	0.69062	FALSE	NoSigChange
1700123M08Rik	chr4	11966574	11994295	+	1066	TKO.DMSO.vs.J1.DMSO	-0.742022	-0.0701897	2.22691	0.135625	0.292195	FALSE	NoSigChange
1700123O20Rik	chr14	54686171	54690742	+	1889	TKO.DMSO.vs.J1.DMSO	-0.100971	5.62421	0.629489	0.427543	0.625474	FALSE	NoSigChange
1810009A15Rik	chr19	8888903	8890740	+	615	TKO.DMSO.vs.J1.DMSO	-0.338249	6.02606	6.88984	0.00866869	0.0370972	FALSE	NoSigChange
1810010H24Rik	chr11	107028223	107030442	+	1099	TKO.DMSO.vs.J1.DMSO	0.851495	1.4167	4.50078	0.0338793	0.107172	FALSE	NoSigChange
1810011O10Rik	chr8	24437616	24438946	-	1331	TKO.DMSO.vs.J1.DMSO	-0.949946	1.97486	4.58441	0.0322642	0.103438	FALSE	NoSigChange
1810013D10Rik	chr5	53267106	53278540	+	954	TKO.DMSO.vs.J1.DMSO	-0.277137	4.52066	2.90885	0.0880949	0.216637	FALSE	NoSigChange
1810013L24Rik	chr16	8830100	8858924	+	4074	TKO.DMSO.vs.J1.DMSO	0.168775	6.73196	2.04405	0.152802	0.317884	FALSE	NoSigChange
1810014B01Rik	chr10	86685527	86689954	+	1620	TKO.DMSO.vs.J1.DMSO	-0.251333	2.35558	0.831413	0.361864	0.563682	FALSE	NoSigChange
1810019D21Rik	chr8	106135400	106138722	+	1646	TKO.DMSO.vs.J1.DMSO	-0.556569	1.74861	2.98727	0.0839215	0.209042	FALSE	NoSigChange
1810019J16Rik	chr4	133518963	133530790	+	1796	TKO.DMSO.vs.J1.DMSO	-0.183829	2.80669	0.627488	0.428278	0.626103	FALSE	NoSigChange
1810022K09Rik	chr3	14606289	14611256	-	401	TKO.DMSO.vs.J1.DMSO	0.0339675	3.83349	0.0361428	0.849221	0.923412	FALSE	NoSigChange
1810026B05Rik	chr7	73539798	73558395	-	5143	TKO.DMSO.vs.J1.DMSO	-0.25093	4.98652	1.96927	0.160525	0.328959	FALSE	NoSigChange
1810026J23Rik	chr9	21592722	21595970	+	3170	TKO.DMSO.vs.J1.DMSO	0.301646	5.55537	5.79545	0.0160677	0.0603163	FALSE	NoSigChange
1810030O07Rik	chrX	12654884	12673546	-	2572	TKO.DMSO.vs.J1.DMSO	0.04981	5.42755	0.176158	0.674696	0.818279	FALSE	NoSigChange
1810032O08Rik	chr11	116671660	116675798	+	1997	TKO.DMSO.vs.J1.DMSO	0.0554003	5.82207	0.208413	0.648014	0.799163	FALSE	NoSigChange
1810037I17Rik	chr3	122924397	122926194	+	976	TKO.DMSO.vs.J1.DMSO	0.00229649	5.24872	0.000325413	0.985608	0.9935	FALSE	NoSigChange
1810041L15Rik	chr15	84379203	84447097	-	5917	TKO.DMSO.vs.J1.DMSO	-1.63189	1.76641	22.0188	2.69995e-06	3.87358e-05	FALSE	NoSigChange
1810043G02Rik	chr10	77978650	77985438	+	1696	TKO.DMSO.vs.J1.DMSO	-0.327715	2.73262	2.3232	0.127458	0.280614	FALSE	NoSigChange
1810043H04Rik	chr11	120098934	120100424	+	494	TKO.DMSO.vs.J1.DMSO	0.138899	3.61867	0.637068	0.424774	0.622921	FALSE	NoSigChange
1810044D09Rik	chr6	91440987	91441755	+	486	TKO.DMSO.vs.J1.DMSO	0.219025	1.03225	0.29305	0.588272	0.757972	FALSE	NoSigChange
1810055G02Rik	chr19	3708333	3717881	+	1882	TKO.DMSO.vs.J1.DMSO	-0.0882663	4.22559	0.294471	0.58737	0.757291	FALSE	NoSigChange
1810058I24Rik	chr6	35252699	35262059	+	1302	TKO.DMSO.vs.J1.DMSO	-0.154029	5.49783	1.42243	0.233004	0.424054	FALSE	NoSigChange
1810062G17Rik	chr3	36475937	36482299	+	911	TKO.DMSO.vs.J1.DMSO	0.830496	-0.256081	0.52622	0.4682	0.662479	FALSE	NoSigChange
2010001M06Rik	chr5	135012122	135013157	-	500	TKO.DMSO.vs.J1.DMSO	-0.0246145	2.18657	0.00713335	0.932691	0.96638	FALSE	NoSigChange
2010003O02Rik	chr4	40269579	40270221	+	325	TKO.DMSO.vs.J1.DMSO	-1.10006	0.376508	7.24632	0.00710466	0.0316683	FALSE	NoSigChange
2010012O05Rik	chr19	46689906	46703382	+	2176	TKO.DMSO.vs.J1.DMSO	-0.0440318	1.8229	0.0219148	0.882314	0.941325	FALSE	NoSigChange
2010015L04Rik	chr4	155409190	155443110	+	4670	TKO.DMSO.vs.J1.DMSO	-0.315489	3.43023	2.4622	0.116616	0.262631	FALSE	NoSigChange
2010107E04Rik	chr12	111961376	111966977	-	365	TKO.DMSO.vs.J1.DMSO	0.0596586	6.61674	0.298601	0.584761	0.755494	FALSE	NoSigChange
2010107G12Rik	chr6	34945295	34977999	-	2158	TKO.DMSO.vs.J1.DMSO	0.492281	1.03717	0.801175	0.370742	0.571314	FALSE	NoSigChange
2010107G23Rik	chr10	62107656	62111013	-	1731	TKO.DMSO.vs.J1.DMSO	-0.273388	3.51056	2.03876	0.153335	0.318556	FALSE	NoSigChange
2010111I01Rik	chr13	63014934	63299656	+	3509	TKO.DMSO.vs.J1.DMSO	-0.206099	5.10187	2.02418	0.154813	0.320751	FALSE	NoSigChange
2010204K13Rik	chrX	7411817	7422988	-	946	TKO.DMSO.vs.J1.DMSO	-0.312991	3.87158	2.45722	0.116986	0.263309	FALSE	NoSigChange
2010300C02Rik	chr1	37611676	37719811	-	4361	TKO.DMSO.vs.J1.DMSO	1.76123	2.24345	23.3425	1.35573e-06	2.08244e-05	FALSE	NoSigChange
2010315B03Rik	chr9	124291804	124312694	-	2759	TKO.DMSO.vs.J1.DMSO	0.128373	1.66536	0.14945	0.699061	0.83329	FALSE	NoSigChange
2010320M18Rik	chr8	70776862	70777606	+	745	TKO.DMSO.vs.J1.DMSO	-0.10376	3.05309	0.268523	0.604324	0.769149	FALSE	NoSigChange
2200002D01Rik	chr7	29247521	29248467	-	507	TKO.DMSO.vs.J1.DMSO	-1.53597	2.808	22.1937	2.46481e-06	3.56309e-05	FALSE	NoSigChange
2210013O21Rik	chrX	153723554	153741296	+	856	TKO.DMSO.vs.J1.DMSO	-0.506532	3.31598	5.66419	0.0173147	0.0637397	FALSE	NoSigChange
2210015D19Rik	chr11	5762150	5784710	+	1840	TKO.DMSO.vs.J1.DMSO	0.226565	3.00669	1.29548	0.25504	0.450844	FALSE	NoSigChange
2210016F16Rik	chr13	58380046	58385225	-	2822	TKO.DMSO.vs.J1.DMSO	-0.048627	5.23002	0.140768	0.707519	0.837925	FALSE	NoSigChange
2210016L21Rik	chr5	114942202	114948540	+	1320	TKO.DMSO.vs.J1.DMSO	-0.137048	4.51546	0.676712	0.410721	0.609475	FALSE	NoSigChange
2210018M11Rik	chr7	98590606	98656569	-	4014	TKO.DMSO.vs.J1.DMSO	-0.0201651	5.34295	0.0256574	0.87274	0.936073	FALSE	NoSigChange
2210404J11Rik	chr17	15041612	15064232	+	2668	TKO.DMSO.vs.J1.DMSO	-0.0448934	3.3676	0.0553797	0.813954	0.902995	FALSE	NoSigChange
2210404O07Rik	chr10	81393064	81395079	+	575	TKO.DMSO.vs.J1.DMSO	0.341935	-0.267557	0.320385	0.571377	0.746178	FALSE	NoSigChange
2210404O09Rik	chr17	21879570	21909926	-	2221	TKO.DMSO.vs.J1.DMSO	0.549571	4.10394	5.98221	0.0144509	0.0555904	FALSE	NoSigChange
2210408I21Rik	chr13	77135536	77613679	+	5632	TKO.DMSO.vs.J1.DMSO	0.183115	3.77806	0.995058	0.318509	0.519373	FALSE	NoSigChange
2210409E12Rik	chr11	88972638	88973014	+	377	TKO.DMSO.vs.J1.DMSO	1.22143	1.94361	12.1599	0.000488283	0.00347051	FALSE	NoSigChange
2300009A05Rik	chr9	63394447	63399244	-	598	TKO.DMSO.vs.J1.DMSO	0.0436711	0.983832	0.0110903	0.916129	0.95831	FALSE	NoSigChange
2310003H01Rik	chr11	120369562	120378746	-	3175	TKO.DMSO.vs.J1.DMSO	0.200531	5.01518	2.26268	0.132525	0.287938	FALSE	NoSigChange
2310005G13Rik	chr16	57036967	57071346	-	3067	TKO.DMSO.vs.J1.DMSO	1.99867	0.0620205	6.85977	0.0088158	0.0375684	FALSE	NoSigChange
2310007B03Rik	chr1	93151355	93160948	-	2362	TKO.DMSO.vs.J1.DMSO	-3.24508	0.528298	17.4816	2.90103e-05	0.00030924	FALSE	NoSigChange
2310008H04Rik	chr16	15889227	16146833	-	3261	TKO.DMSO.vs.J1.DMSO	-0.0300164	6.04107	0.0660217	0.79722	0.892103	FALSE	NoSigChange
2310008H09Rik	chr7	118842218	118855998	-	5612	TKO.DMSO.vs.J1.DMSO	0.0567209	8.18892	0.244522	0.620959	0.781242	FALSE	NoSigChange
2310009A05Rik	chr9	73039718	73042775	+	492	TKO.DMSO.vs.J1.DMSO	0.0688916	3.01231	0.103831	0.747279	0.863179	FALSE	NoSigChange
2310009B15Rik	chr1	138851979	138856854	-	571	TKO.DMSO.vs.J1.DMSO	0.276325	2.58392	1.36335	0.242957	0.436944	FALSE	NoSigChange
2310010J17Rik	chr7	90124836	90129936	-	538	TKO.DMSO.vs.J1.DMSO	0.107413	0.805064	0.0996839	0.752209	0.866187	FALSE	NoSigChange
2310011J03Rik	chr10	80318255	80320548	-	1659	TKO.DMSO.vs.J1.DMSO	-0.220314	5.25963	2.02926	0.154295	0.319941	FALSE	NoSigChange
2310014L17Rik	chr7	12927416	12931072	+	3239	TKO.DMSO.vs.J1.DMSO	0.551732	2.16873	3.2177	0.0728459	0.18855	FALSE	NoSigChange
2310015A10Rik	chr12	80120546	80132844	-	4845	TKO.DMSO.vs.J1.DMSO	0.15871	2.13669	0.359275	0.548909	0.728887	FALSE	NoSigChange
2310022A10Rik	chr7	27553290	27582098	+	2719	TKO.DMSO.vs.J1.DMSO	0.00785383	3.73907	0.0020326	0.96404	0.983422	FALSE	NoSigChange
2310022B05Rik	chr8	124635756	124663369	-	3307	TKO.DMSO.vs.J1.DMSO	-0.744831	4.47941	21.9768	2.75972e-06	3.94446e-05	FALSE	NoSigChange
2310030G06Rik	chr9	50739691	50746521	-	1242	TKO.DMSO.vs.J1.DMSO	-0.634766	1.62117	3.82956	0.0503562	0.143831	FALSE	NoSigChange
2310033P09Rik	chr11	59208361	59210734	+	1241	TKO.DMSO.vs.J1.DMSO	-0.609852	3.27129	11.356	0.000752053	0.00496864	FALSE	NoSigChange
2310034G01Rik	chr19	46348201	46348988	-	788	TKO.DMSO.vs.J1.DMSO	1.21536	0.124553	6.98068	0.00823942	0.0356227	FALSE	NoSigChange
2310035C23Rik	chr1	105663861	105755131	+	5406	TKO.DMSO.vs.J1.DMSO	0.167978	7.13467	2.4999	0.113854	0.258592	FALSE	NoSigChange
2310036O22Rik	chr8	85026833	85030286	+	892	TKO.DMSO.vs.J1.DMSO	-0.181508	7.09157	2.25791	0.132934	0.288456	FALSE	NoSigChange
2310039H08Rik	chr17	46772635	46773407	+	773	TKO.DMSO.vs.J1.DMSO	0.0305568	2.63289	0.0182925	0.892414	0.94655	FALSE	NoSigChange
2310039L15Rik	chr10	95336276	95363216	+	642	TKO.DMSO.vs.J1.DMSO	0.125534	0.638937	0.0671462	0.795538	0.891139	FALSE	NoSigChange
2310040G24Rik	chr6	86483376	86488227	-	775	TKO.DMSO.vs.J1.DMSO	0.212227	0.738831	0.420144	0.516865	0.702726	FALSE	NoSigChange
2310043L19Rik	chr1	177641542	177642943	-	698	TKO.DMSO.vs.J1.DMSO	1.99133	-0.0253861	2.53374	0.111436	0.25485	FALSE	NoSigChange
2310044G17Rik	chr12	86947043	86965365	+	4410	TKO.DMSO.vs.J1.DMSO	0.0697504	5.8012	0.340606	0.55948	0.737287	FALSE	NoSigChange
2310045N01Rik	chr8	70139713	70147260	+	600	TKO.DMSO.vs.J1.DMSO	-0.34593	3.96168	2.48934	0.11462	0.259789	FALSE	NoSigChange
2310047M10Rik	chr11	69059775	69061576	+	1802	TKO.DMSO.vs.J1.DMSO	0.0995033	4.12591	0.21789	0.640653	0.794383	FALSE	NoSigChange
2310057M21Rik	chr7	131342718	131362698	-	2214	TKO.DMSO.vs.J1.DMSO	0.204844	3.96983	1.71924	0.18979	0.368588	FALSE	NoSigChange
2310061I04Rik	chr17	35892677	35897378	-	1240	TKO.DMSO.vs.J1.DMSO	-0.0744054	3.35702	0.146999	0.70142	0.834824	FALSE	NoSigChange
2310061J03Rik	chr16	55973268	55974617	-	1350	TKO.DMSO.vs.J1.DMSO	0.28094	1.76763	0.831069	0.361964	0.563683	FALSE	NoSigChange
2310067B10Rik	chr11	115765433	115799033	+	4996	TKO.DMSO.vs.J1.DMSO	-0.444814	4.62323	7.84105	0.00510729	0.0244245	FALSE	NoSigChange
2410002F23Rik	chr7	44246722	44252319	+	1982	TKO.DMSO.vs.J1.DMSO	-0.16213	6.72086	1.34448	0.246246	0.440858	FALSE	NoSigChange
2410003L11Rik	chr11	97598511	97622893	+	612	TKO.DMSO.vs.J1.DMSO	0.0388566	4.76141	0.0788672	0.778838	0.880597	FALSE	NoSigChange
2410004B18Rik	chr3	145938032	145944275	+	975	TKO.DMSO.vs.J1.DMSO	-0.00761581	4.8551	0.00177946	0.966352	0.984724	FALSE	NoSigChange
2410004I01Rik	chr11	102958300	102964154	-	954	TKO.DMSO.vs.J1.DMSO	-0.543182	0.254051	1.43611	0.23077	0.421474	FALSE	NoSigChange
2410004N09Rik	chr18	33794892	33795989	+	433	TKO.DMSO.vs.J1.DMSO	-0.102296	4.48281	0.363789	0.54641	0.727073	FALSE	NoSigChange
2410004P03Rik	chr12	17004958	17011727	-	1798	TKO.DMSO.vs.J1.DMSO	0.241725	0.86341	0.32193	0.57045	0.745758	FALSE	NoSigChange
2410006H16Rik	chr11	62602877	62604806	+	461	TKO.DMSO.vs.J1.DMSO	-0.255977	6.21965	4.45949	0.0347078	0.109203	FALSE	NoSigChange
2410007B07Rik	chr3	75647441	75655731	-	1031	TKO.DMSO.vs.J1.DMSO	0.00141806	6.21604	4.23685e-05	0.994807	0.997099	FALSE	NoSigChange
2410012M07Rik	chr9	98864767	98866580	+	1814	TKO.DMSO.vs.J1.DMSO	0.75265	0.538443	3.09686	0.0784435	0.199111	FALSE	NoSigChange
2410015M20Rik	chr17	56607452	56609771	-	755	TKO.DMSO.vs.J1.DMSO	-0.00406195	5.83576	0.00113188	0.973161	0.98763	FALSE	NoSigChange
2410016O06Rik	chr12	83950608	83952953	+	2346	TKO.DMSO.vs.J1.DMSO	0.00979265	5.64579	0.00712019	0.932753	0.96638	FALSE	NoSigChange
2410018M08Rik	chr5	129895723	129903622	+	2491	TKO.DMSO.vs.J1.DMSO	0.450996	4.68628	10.6643	0.00109226	0.00685248	FALSE	NoSigChange
2410021H03Rik	chr17	69275362	69277206	-	762	TKO.DMSO.vs.J1.DMSO	-0.60838	0.820002	2.36781	0.123861	0.274921	FALSE	NoSigChange
2410066E13Rik	chr6	54681772	54700406	+	1710	TKO.DMSO.vs.J1.DMSO	0.291441	2.67797	0.906391	0.341074	0.543021	FALSE	NoSigChange
2410076I21Rik	chr9	58652856	58741559	-	883	TKO.DMSO.vs.J1.DMSO	2.43247	3.87952	40.8292	1.66128e-10	6.15281e-09	TRUE	SigIncrease
2410088K16Rik	chr1	88754890	88755733	+	476	TKO.DMSO.vs.J1.DMSO	0.275078	3.16761	0.560241	0.454163	0.649439	FALSE	NoSigChange
2410089E03Rik	chr15	8169106	8271158	+	10469	TKO.DMSO.vs.J1.DMSO	0.239936	6.27321	4.4093	0.0357435	0.111631	FALSE	NoSigChange
2410124H12Rik	chr16	92478742	92497365	+	705	TKO.DMSO.vs.J1.DMSO	-1.12745	0.891296	6.5828	0.0102969	0.0424307	FALSE	NoSigChange
2410127L17Rik	chr19	18670780	18704792	+	2094	TKO.DMSO.vs.J1.DMSO	0.0334953	2.68777	0.0163415	0.89828	0.949973	FALSE	NoSigChange
2410131K14Rik	chr5	118245227	118263114	+	2670	TKO.DMSO.vs.J1.DMSO	0.0971958	4.8684	0.418758	0.517557	0.703039	FALSE	NoSigChange
2410137F16Rik	chr5	116438722	116465487	+	3358	TKO.DMSO.vs.J1.DMSO	0.841442	1.18283	6.74992	0.00937517	0.0393788	FALSE	NoSigChange
2410137M14Rik	chr17	36977701	36981237	-	865	TKO.DMSO.vs.J1.DMSO	0.5889	1.94438	6.04497	0.013946	0.0542236	FALSE	NoSigChange
2410141K09Rik	chr13	66418114	66441118	-	515	TKO.DMSO.vs.J1.DMSO	0.681289	2.40147	7.14419	0.00752073	0.0330964	FALSE	NoSigChange
2500004C02Rik	chr2	153341157	153345810	-	1898	TKO.DMSO.vs.J1.DMSO	0.0397822	1.53513	0.00908364	0.92407	0.961857	FALSE	NoSigChange
2510002D24Rik	chr16	18836580	18840113	+	1232	TKO.DMSO.vs.J1.DMSO	0.170811	2.27257	0.589373	0.442662	0.638405	FALSE	NoSigChange
2510003E04Rik	chr10	62558470	62578457	-	2472	TKO.DMSO.vs.J1.DMSO	0.114518	5.38856	0.771	0.379908	0.579513	FALSE	NoSigChange
2510009E07Rik	chr16	21649045	21694665	-	5164	TKO.DMSO.vs.J1.DMSO	0.214677	1.62911	0.133058	0.715282	0.842791	FALSE	NoSigChange
2510039O18Rik	chr4	147940895	147947314	+	2731	TKO.DMSO.vs.J1.DMSO	0.421792	6.50038	13.1962	0.000280512	0.00217521	FALSE	NoSigChange
2610001J05Rik	chr6	13869074	13871483	-	1803	TKO.DMSO.vs.J1.DMSO	-0.178925	4.64219	1.36414	0.242822	0.436809	FALSE	NoSigChange
2610002J02Rik	chr4	155249966	155256687	+	1519	TKO.DMSO.vs.J1.DMSO	-0.308857	3.39777	1.58214	0.208453	0.393486	FALSE	NoSigChange
2610002M06Rik	chrX	107782752	107816334	-	5841	TKO.DMSO.vs.J1.DMSO	0.21724	4.8768	2.04159	0.153049	0.31818	FALSE	NoSigChange
2610005L07Rik	chr8	20385782	20424814	-	4009	TKO.DMSO.vs.J1.DMSO	0.370125	3.23787	3.00178	0.0831729	0.207516	FALSE	NoSigChange
2610008E11Rik	chr10	79064374	79097600	-	4229	TKO.DMSO.vs.J1.DMSO	-0.410004	4.69592	6.74398	0.00940644	0.0394666	FALSE	NoSigChange
2610015P09Rik	chr16	43889902	43964314	+	3643	TKO.DMSO.vs.J1.DMSO	-0.167333	4.14599	0.590896	0.442073	0.638076	FALSE	NoSigChange
2610018G03Rik	chrX	50841436	50891850	+	2003	TKO.DMSO.vs.J1.DMSO	-0.320982	5.20433	4.69385	0.0302708	0.0988167	FALSE	NoSigChange
2610019E17Rik	chr17	24528251	24528744	+	295	TKO.DMSO.vs.J1.DMSO	0.881643	4.64025	30.0084	4.30171e-08	9.53138e-07	TRUE	SigIncrease
2610019F03Rik	chr8	13952008	13974777	-	2463	TKO.DMSO.vs.J1.DMSO	0.387556	5.63117	9.61326	0.00193177	0.0110464	FALSE	NoSigChange
2610020C07Rik	chr16	11203383	11225796	+	2156	TKO.DMSO.vs.J1.DMSO	-0.0984101	1.68295	0.0653565	0.798222	0.892799	FALSE	NoSigChange
2610020H08Rik	chr7	119794130	119848941	+	2348	TKO.DMSO.vs.J1.DMSO	-0.161185	3.55899	0.519137	0.47121	0.665298	FALSE	NoSigChange
2610034B18Rik	chr7	79925359	79935264	-	2184	TKO.DMSO.vs.J1.DMSO	0.383015	2.8074	2.97501	0.0845596	0.210184	FALSE	NoSigChange
2610035D17Rik	chr11	113043906	113201838	-	1848	TKO.DMSO.vs.J1.DMSO	0.0640486	0.868493	0.0118335	0.913375	0.957271	FALSE	NoSigChange
2610037D02Rik	chr15	96190474	96197974	-	3631	TKO.DMSO.vs.J1.DMSO	-1.15062	1.97136	16.8096	4.13227e-05	0.000418785	FALSE	NoSigChange
2610044O15Rik8	chr8	129216615	129234003	-	1472	TKO.DMSO.vs.J1.DMSO	-0.353002	4.60617	4.02718	0.0447727	0.13249	FALSE	NoSigChange
2610203C20Rik	chr9	41581339	41592487	+	2578	TKO.DMSO.vs.J1.DMSO	-2.89185	-0.55956	18.5782	1.63078e-05	0.000189262	FALSE	NoSigChange
2610301B20Rik	chr4	10874498	10899423	+	2118	TKO.DMSO.vs.J1.DMSO	-0.326483	4.39675	4.05967	0.043919	0.130674	FALSE	NoSigChange
2610301G19Rik	chr14	70138169	70153791	-	3704	TKO.DMSO.vs.J1.DMSO	-0.159142	6.3081	1.75959	0.184675	0.362798	FALSE	NoSigChange
2610305D13Rik	chr4	147611936	147642508	-	2561	TKO.DMSO.vs.J1.DMSO	0.439525	7.75362	3.77354	0.0520694	0.147653	FALSE	NoSigChange
2610306M01Rik	chr6	86848407	86849440	-	1034	TKO.DMSO.vs.J1.DMSO	-0.52712	2.01554	2.69642	0.100574	0.237796	FALSE	NoSigChange
2610307P16Rik	chr13	28460034	28885422	-	2716	TKO.DMSO.vs.J1.DMSO	-1.14878	2.65337	8.05911	0.00452753	0.0221019	FALSE	NoSigChange
2610318N02Rik	chr16	17113398	17125106	-	1266	TKO.DMSO.vs.J1.DMSO	-0.148387	3.79934	0.840517	0.359249	0.561101	FALSE	NoSigChange
2610507B11Rik	chr11	78261754	78290625	+	7443	TKO.DMSO.vs.J1.DMSO	-0.164415	8.88412	2.86597	0.0904713	0.220937	FALSE	NoSigChange
2610524H06Rik	chr5	114821937	114823468	-	945	TKO.DMSO.vs.J1.DMSO	0.581816	4.76242	14.8877	0.000114107	0.00100459	FALSE	NoSigChange
2610528J11Rik	chr4	118527275	118530217	+	915	TKO.DMSO.vs.J1.DMSO	-0.856815	1.96498	6.46902	0.0109771	0.0446534	FALSE	NoSigChange
2700029M09Rik	chr8	60890451	60907572	+	1183	TKO.DMSO.vs.J1.DMSO	-0.324359	6.42674	8.47897	0.00359276	0.018389	FALSE	NoSigChange
2700038G22Rik	chr5	23850597	23855033	+	1370	TKO.DMSO.vs.J1.DMSO	-0.202747	3.19897	1.10407	0.293376	0.493736	FALSE	NoSigChange
2700046G09Rik	chr19	32389216	32391184	+	1641	TKO.DMSO.vs.J1.DMSO	-0.123457	0.825544	0.110588	0.739476	0.857885	FALSE	NoSigChange
2700049A03Rik	chr12	71136848	71243303	+	5763	TKO.DMSO.vs.J1.DMSO	0.11177	6.32119	0.938391	0.332692	0.533979	FALSE	NoSigChange
2700050L05Rik	chr7	133637675	133673017	+	5338	TKO.DMSO.vs.J1.DMSO	0.107189	7.07415	0.599967	0.438591	0.635105	FALSE	NoSigChange
2700054A10Rik	chr17	13487021	13554094	-	4348	TKO.DMSO.vs.J1.DMSO	-0.498825	0.253137	0.785647	0.37542	0.575677	FALSE	NoSigChange
2700060E02Rik	chr14	19811402	19823823	-	1510	TKO.DMSO.vs.J1.DMSO	-0.0561479	6.88402	0.286064	0.592754	0.760271	FALSE	NoSigChange
2700062C07Rik	chr18	24470871	24477767	+	1032	TKO.DMSO.vs.J1.DMSO	-0.185247	4.00221	1.33496	0.247924	0.442946	FALSE	NoSigChange
2700081O15Rik	chr19	7417625	7425904	+	4989	TKO.DMSO.vs.J1.DMSO	0.567163	4.86125	11.8105	0.00058897	0.00406405	FALSE	NoSigChange
2700089E24Rik	chr6	133105239	133110899	+	2738	TKO.DMSO.vs.J1.DMSO	-0.0681807	4.13717	0.146589	0.701817	0.834923	FALSE	NoSigChange
2700094K13Rik	chr2	84669221	84670708	-	679	TKO.DMSO.vs.J1.DMSO	-0.18069	6.92913	0.716392	0.39733	0.596968	FALSE	NoSigChange
2700097O09Rik	chr12	55045661	55080110	-	1187	TKO.DMSO.vs.J1.DMSO	-0.020574	4.69149	0.0161686	0.898817	0.949996	FALSE	NoSigChange
2700099C18Rik	chr17	94750100	94775129	+	1275	TKO.DMSO.vs.J1.DMSO	-0.123165	3.51799	0.437479	0.508342	0.695924	FALSE	NoSigChange
2810001G20Rik	chr11	64079484	64083259	+	901	TKO.DMSO.vs.J1.DMSO	-0.280852	3.13368	1.1067	0.2928	0.49314	FALSE	NoSigChange
2810002D19Rik	chr2	94406707	94411680	+	1482	TKO.DMSO.vs.J1.DMSO	-0.970492	1.96269	11.6694	0.000635373	0.00432349	FALSE	NoSigChange
2810004N23Rik	chr8	124839355	124863029	-	1382	TKO.DMSO.vs.J1.DMSO	-0.717097	7.20098	39.8506	2.74156e-10	9.75046e-09	TRUE	SigDecrease
2810006K23Rik	chr5	124328089	124341844	+	2872	TKO.DMSO.vs.J1.DMSO	-0.317819	3.67945	2.68438	0.101336	0.238969	FALSE	NoSigChange
2810008D09Rik	chr11	117076783	117078955	+	600	TKO.DMSO.vs.J1.DMSO	-0.271745	3.71271	2.48189	0.115164	0.260553	FALSE	NoSigChange
2810011L19Rik	chr12	105336594	105383932	+	3282	TKO.DMSO.vs.J1.DMSO	0.488713	1.93151	2.54708	0.110499	0.253391	FALSE	NoSigChange
2810013P06Rik	chr8	123042575	123044602	+	2028	TKO.DMSO.vs.J1.DMSO	-0.25457	4.06712	1.00218	0.316783	0.517334	FALSE	NoSigChange
2810021J22Rik	chr11	58867240	58884338	+	4892	TKO.DMSO.vs.J1.DMSO	0.0309096	4.3541	0.0356447	0.850251	0.923904	FALSE	NoSigChange
2810025M15Rik	chr1	157412352	157420236	+	1194	TKO.DMSO.vs.J1.DMSO	0.0533637	6.08128	0.163592	0.68587	0.8254	FALSE	NoSigChange
2810029C07Rik	chr12	111572317	111574402	-	1954	TKO.DMSO.vs.J1.DMSO	0.633461	1.17364	2.31604	0.128046	0.281501	FALSE	NoSigChange
2810032G03Rik	chr12	5376502	5416132	+	1258	TKO.DMSO.vs.J1.DMSO	1.23971	0.0259417	3.11794	0.0774345	0.197471	FALSE	NoSigChange
2810403A07Rik	chr3	88685794	88712933	+	2999	TKO.DMSO.vs.J1.DMSO	-0.267268	6.70035	5.00528	0.0252701	0.0858784	FALSE	NoSigChange
2810403D21Rik	chrX	108834478	108886896	+	1005	TKO.DMSO.vs.J1.DMSO	-0.78539	0.753062	4.33706	0.0372913	0.115352	FALSE	NoSigChange
2810407C02Rik	chr3	58576658	58593546	+	3548	TKO.DMSO.vs.J1.DMSO	0.104084	7.70997	0.489637	0.484089	0.676844	FALSE	NoSigChange
2810408A11Rik	chr11	69897358	69900986	-	1674	TKO.DMSO.vs.J1.DMSO	-0.364517	3.00339	2.16371	0.141303	0.300517	FALSE	NoSigChange
2810408I11Rik	chr1	64679869	64690659	-	713	TKO.DMSO.vs.J1.DMSO	-0.0448792	3.52418	0.0377697	0.845906	0.921709	FALSE	NoSigChange
2810408M09Rik	chr2	165490112	165493314	-	1868	TKO.DMSO.vs.J1.DMSO	0.0341499	4.88548	0.066955	0.795823	0.89133	FALSE	NoSigChange
2810410L24Rik	chr11	120186650	120189856	-	1707	TKO.DMSO.vs.J1.DMSO	0.10586	0.922823	0.086733	0.768372	0.874776	FALSE	NoSigChange
2810417H13Rik	chr9	65890323	65903551	+	2387	TKO.DMSO.vs.J1.DMSO	-0.175236	6.04695	0.95862	0.327535	0.528583	FALSE	NoSigChange
2810428I15Rik	chr8	70504296	70506739	-	657	TKO.DMSO.vs.J1.DMSO	-0.140971	5.88506	1.07273	0.300329	0.500668	FALSE	NoSigChange
2810429I04Rik	chr13	3478303	3492398	+	585	TKO.DMSO.vs.J1.DMSO	-0.965856	1.50067	9.11562	0.00253437	0.0138412	FALSE	NoSigChange
2810442I21Rik	chr11	16936723	16951093	-	3137	TKO.DMSO.vs.J1.DMSO	-0.784811	2.12303	5.19854	0.0226059	0.0789237	FALSE	NoSigChange
2810454H06Rik	chr6	134897961	134900785	+	2825	TKO.DMSO.vs.J1.DMSO	0.165926	2.076	0.475217	0.490597	0.681251	FALSE	NoSigChange
2810459M11Rik	chr1	86045863	86055456	+	3331	TKO.DMSO.vs.J1.DMSO	0.617394	1.08979	2.65213	0.103411	0.241987	FALSE	NoSigChange
2810468N07Rik	chr17	25570811	25575043	+	1349	TKO.DMSO.vs.J1.DMSO	0.699791	1.60258	4.19279	0.0405961	0.122952	FALSE	NoSigChange
2810474O19Rik	chr6	149309414	149335663	+	6080	TKO.DMSO.vs.J1.DMSO	0.0493151	8.26864	0.0985887	0.75353	0.86672	FALSE	NoSigChange
2900011O08Rik	chr16	13986637	14101494	+	2355	TKO.DMSO.vs.J1.DMSO	-0.988485	3.89343	14.5435	0.000136957	0.0011699	FALSE	NoSigChange
2900026A02Rik	chr5	113086323	113163313	-	5838	TKO.DMSO.vs.J1.DMSO	-0.280526	4.22997	2.75718	0.0968188	0.231455	FALSE	NoSigChange
2900041M22Rik	chr11	117611247	117613417	+	1344	TKO.DMSO.vs.J1.DMSO	-0.527679	2.48009	2.51641	0.112667	0.256532	FALSE	NoSigChange
2900056M20Rik	chrX	152294828	152327493	-	4254	TKO.DMSO.vs.J1.DMSO	0.199098	2.39281	0.615879	0.432583	0.629761	FALSE	NoSigChange
2900060B14Rik	chr1	118458669	118459265	-	597	TKO.DMSO.vs.J1.DMSO	0.820475	2.98385	12.8321	0.000340719	0.00256754	FALSE	NoSigChange
2900076A07Rik	chr7	81523550	81531498	+	854	TKO.DMSO.vs.J1.DMSO	-0.262761	1.95763	1.10781	0.292558	0.49295	FALSE	NoSigChange
2900097C17Rik	chr2	156388063	156392979	-	4917	TKO.DMSO.vs.J1.DMSO	0.0418184	6.07148	0.129461	0.718992	0.844988	FALSE	NoSigChange
3000002C10Rik	chr9	109830154	109831431	-	1278	TKO.DMSO.vs.J1.DMSO	0.164946	0.825987	0.148822	0.699664	0.833616	FALSE	NoSigChange
3010026O09Rik	chr11	50174851	50200115	+	1140	TKO.DMSO.vs.J1.DMSO	0.147255	3.93764	0.517566	0.471882	0.665831	FALSE	NoSigChange
3110001D03Rik	chr4	75277354	75278286	-	722	TKO.DMSO.vs.J1.DMSO	-0.0195812	5.07678	0.0226254	0.880435	0.940259	FALSE	NoSigChange
3110001I22Rik	chr16	13672020	13678385	+	1611	TKO.DMSO.vs.J1.DMSO	0.293148	4.21363	2.69834	0.100453	0.237621	FALSE	NoSigChange
3110002H16Rik	chr18	12168730	12189969	+	2129	TKO.DMSO.vs.J1.DMSO	0.230158	5.12008	2.76562	0.0963094	0.230579	FALSE	NoSigChange
3110009E18Rik	chr1	120121187	120188189	+	1089	TKO.DMSO.vs.J1.DMSO	-0.957598	1.45664	10.1077	0.00147648	0.00886586	FALSE	NoSigChange
3110040N11Rik	chr7	81782187	81789453	-	857	TKO.DMSO.vs.J1.DMSO	-0.132978	3.64763	0.602365	0.437677	0.634205	FALSE	NoSigChange
3110043O21Rik	chr4	35191282	35225880	-	3198	TKO.DMSO.vs.J1.DMSO	0.244716	5.68049	3.44557	0.0634217	0.170446	FALSE	NoSigChange
3110052M02Rik	chr17	21650611	21664966	+	4367	TKO.DMSO.vs.J1.DMSO	-0.0418753	1.91568	0.0167332	0.897075	0.949052	FALSE	NoSigChange
3110056K07Rik	chr12	70991615	71015823	-	1588	TKO.DMSO.vs.J1.DMSO	-0.00339411	1.73822	0.000114299	0.99147	0.995722	FALSE	NoSigChange
3110057O12Rik	chr3	40894277	40936307	+	2492	TKO.DMSO.vs.J1.DMSO	0.355314	1.91213	1.24267	0.264958	0.46284	FALSE	NoSigChange
3110062M04Rik	chr6	34871771	34878065	-	3725	TKO.DMSO.vs.J1.DMSO	-0.0395366	3.19389	0.0354699	0.850614	0.923993	FALSE	NoSigChange
3110082I17Rik	chr5	139359739	139460534	-	1461	TKO.DMSO.vs.J1.DMSO	-0.297766	5.54619	6.40456	0.0113828	0.0460453	FALSE	NoSigChange
3230401D17Rik	chr2	163405822	163419470	-	1562	TKO.DMSO.vs.J1.DMSO	0.0950889	3.27353	0.239755	0.624383	0.782896	FALSE	NoSigChange
3300002I08Rik	chr2	150310937	150362765	-	648	TKO.DMSO.vs.J1.DMSO	0.170296	1.17087	0.249595	0.617361	0.778774	FALSE	NoSigChange
3632451O06Rik	chr14	49682019	49783367	-	2748	TKO.DMSO.vs.J1.DMSO	0.63408	5.24324	18.7019	1.52828e-05	0.000178675	FALSE	NoSigChange
3632454L22Rik	chrX	135022422	135060336	-	5236	TKO.DMSO.vs.J1.DMSO	1.25183	1.20407	7.87741	0.00500561	0.0240137	FALSE	NoSigChange
3830403N18Rik	chrX	56136572	56153496	+	1020	TKO.DMSO.vs.J1.DMSO	3.43499	0.662318	10.3343	0.0013058	0.00800199	FALSE	NoSigChange
3830406C13Rik	chr14	12284209	12303231	+	2477	TKO.DMSO.vs.J1.DMSO	0.626152	3.74055	10.8506	0.000987658	0.00627206	FALSE	NoSigChange
3830408C21Rik	chr13	107022570	107033518	+	1898	TKO.DMSO.vs.J1.DMSO	-0.305783	0.648145	0.627527	0.428264	0.626103	FALSE	NoSigChange
3830417A13Rik	chrX	64173548	64178778	+	1649	TKO.DMSO.vs.J1.DMSO	0.155345	4.68329	0.235321	0.627606	0.785463	FALSE	NoSigChange
4632415K11Rik	chr8	119760587	119778416	-	2574	TKO.DMSO.vs.J1.DMSO	-1.23377	4.49782	51.959	5.66719e-13	3.29259e-11	TRUE	SigDecrease
4632415L05Rik	chr3	19894871	19898984	+	4114	TKO.DMSO.vs.J1.DMSO	-0.228967	3.73563	1.67733	0.195279	0.376176	FALSE	NoSigChange
4632427E13Rik	chr7	92740706	92741459	-	669	TKO.DMSO.vs.J1.DMSO	-0.204597	2.94058	0.669257	0.413311	0.611827	FALSE	NoSigChange
4632428N05Rik	chr10	60346851	60372684	+	4846	TKO.DMSO.vs.J1.DMSO	-0.91704	4.56345	16.4901	4.89036e-05	0.000482756	FALSE	NoSigChange
4632434I11Rik	chr7	92857527	92874232	-	3449	TKO.DMSO.vs.J1.DMSO	0.319226	6.70286	6.61993	0.0100844	0.0417018	FALSE	NoSigChange
4732416N19Rik	chr6	148212288	148235663	+	551	TKO.DMSO.vs.J1.DMSO	-0.2386	0.800858	0.419382	0.517246	0.702746	FALSE	NoSigChange
4732471J01Rik	chr7	25376819	25566417	+	4328	TKO.DMSO.vs.J1.DMSO	0.459977	1.92958	3.3258	0.068201	0.18011	FALSE	NoSigChange
4732491K20Rik	chr17	12318853	12327250	+	3174	TKO.DMSO.vs.J1.DMSO	-0.31636	1.06967	0.826549	0.363272	0.564753	FALSE	NoSigChange
4831440E17Rik	chr5	25499797	25504473	+	4677	TKO.DMSO.vs.J1.DMSO	0.703398	1.27217	2.80226	0.0941317	0.226936	FALSE	NoSigChange
4833417C18Rik	chr11	95858817	95861046	+	1319	TKO.DMSO.vs.J1.DMSO	-0.315084	2.60238	1.92075	0.165774	0.336051	FALSE	NoSigChange
4833420G17Rik	chr13	119462759	119486117	+	2700	TKO.DMSO.vs.J1.DMSO	-0.160012	5.31028	1.5126	0.218743	0.406956	FALSE	NoSigChange
4833423E24Rik	chr2	85484092	85518935	-	1685	TKO.DMSO.vs.J1.DMSO	-0.10185	-0.198927	0.00571461	0.939741	0.9708	FALSE	NoSigChange
4833439L19Rik	chr13	54551218	54565382	-	2674	TKO.DMSO.vs.J1.DMSO	-0.0223587	6.48568	0.0420758	0.837475	0.91627	FALSE	NoSigChange
4921506M07Rik	chr12	57564115	57622109	+	1479	TKO.DMSO.vs.J1.DMSO	-1.98194	-0.442458	4.0558	0.0440199	0.130848	FALSE	NoSigChange
4921507P07Rik	chr6	50573304	50596590	-	2334	TKO.DMSO.vs.J1.DMSO	-0.00829482	1.04425	0.000628556	0.979998	0.991198	FALSE	NoSigChange
4921524J17Rik	chr8	85408759	85432841	-	1595	TKO.DMSO.vs.J1.DMSO	-0.155346	4.80627	0.726955	0.393872	0.593381	FALSE	NoSigChange
4921525O09Rik	chr13	52096741	52124160	+	3272	TKO.DMSO.vs.J1.DMSO	2.34283	0.528614	19.7317	8.9111e-06	0.000111458	FALSE	NoSigChange
4921530L18Rik	chr2	14070333	14073934	-	800	TKO.DMSO.vs.J1.DMSO	-0.108239	0.508915	0.0559841	0.81296	0.902454	FALSE	NoSigChange
4921531C22Rik	chr2	179976853	179979013	+	1905	TKO.DMSO.vs.J1.DMSO	0.433141	2.36281	1.83566	0.175461	0.349761	FALSE	NoSigChange
4922501C03Rik	chr9	87191963	87255532	-	5295	TKO.DMSO.vs.J1.DMSO	0.060059	5.16806	0.154849	0.693943	0.830702	FALSE	NoSigChange
4930402H24Rik	chr2	130707853	130840110	-	4951	TKO.DMSO.vs.J1.DMSO	0.0379391	4.35639	0.049416	0.824083	0.909964	FALSE	NoSigChange
4930405A21Rik	chr2	156714539	156720909	-	995	TKO.DMSO.vs.J1.DMSO	0.103961	0.704977	0.0806341	0.77644	0.878995	FALSE	NoSigChange
4930412C18Rik	chr4	9770585	9823411	+	3969	TKO.DMSO.vs.J1.DMSO	0.716289	-0.360103	0.789402	0.374281	0.574441	FALSE	NoSigChange
4930412O13Rik	chr2	9881246	9886767	+	4039	TKO.DMSO.vs.J1.DMSO	-2.14622	-0.0890923	5.01409	0.0251419	0.0855409	FALSE	NoSigChange
4930414L22Rik	chr6	72438683	72440615	+	1933	TKO.DMSO.vs.J1.DMSO	0.0216529	0.798049	0.00430644	0.947678	0.974355	FALSE	NoSigChange
4930422G04Rik	chr3	127553489	127618023	+	7048	TKO.DMSO.vs.J1.DMSO	-0.0869152	5.9808	0.59279	0.441342	0.637452	FALSE	NoSigChange
4930427A07Rik	chr12	113156421	113165458	+	3355	TKO.DMSO.vs.J1.DMSO	0.00410207	5.38008	0.000925443	0.975731	0.989183	FALSE	NoSigChange
4930429B21Rik	chr3	32365489	32367438	+	1950	TKO.DMSO.vs.J1.DMSO	0.340657	1.99422	1.63025	0.201668	0.384396	FALSE	NoSigChange
4930430F08Rik	chr10	100572274	100589259	-	2419	TKO.DMSO.vs.J1.DMSO	0.240224	5.35488	1.75441	0.185324	0.363437	FALSE	NoSigChange
4930432K21Rik	chr8	84148038	84172597	+	2494	TKO.DMSO.vs.J1.DMSO	1.24598	4.42677	36.0676	1.90592e-09	5.88559e-08	TRUE	SigIncrease
4930433N12Rik	chr9	3190269	3199813	-	1382	TKO.DMSO.vs.J1.DMSO	-0.881786	0.815496	2.33085	0.126832	0.279763	FALSE	NoSigChange
4930441O14Rik	chr13	67729262	67756838	+	2908	TKO.DMSO.vs.J1.DMSO	0.576574	-0.147083	1.43965	0.230196	0.420906	FALSE	NoSigChange
4930444A02Rik	chr8	25980604	25994121	-	3601	TKO.DMSO.vs.J1.DMSO	0.0770696	4.97339	0.368719	0.543703	0.72506	FALSE	NoSigChange
4930444M15Rik	chr14	76514558	76520855	-	1658	TKO.DMSO.vs.J1.DMSO	1.35155	1.47167	14.4188	0.000146333	0.00123611	FALSE	NoSigChange
4930447C04Rik	chr12	72881109	72917765	-	1910	TKO.DMSO.vs.J1.DMSO	0.263993	5.54979	1.9052	0.167498	0.338281	FALSE	NoSigChange
4930451G09Rik	chr16	4964288	4978962	+	2832	TKO.DMSO.vs.J1.DMSO	0.180376	0.684384	0.249897	0.617148	0.778708	FALSE	NoSigChange
4930452B06Rik	chr14	8431172	8666290	-	2751	TKO.DMSO.vs.J1.DMSO	0.11987	4.45307	0.447628	0.503463	0.691484	FALSE	NoSigChange
4930453N24Rik	chr16	64766105	64770939	-	1331	TKO.DMSO.vs.J1.DMSO	-0.0474774	6.10995	0.188325	0.664314	0.811052	FALSE	NoSigChange
4930455F23Rik	chr1	164275598	164287847	+	1896	TKO.DMSO.vs.J1.DMSO	-0.325529	4.02209	3.02441	0.0820202	0.205314	FALSE	NoSigChange
4930461G14Rik	chr9	58455173	58469623	+	780	TKO.DMSO.vs.J1.DMSO	0.321535	3.31826	2.41621	0.120085	0.268735	FALSE	NoSigChange
4930467D21Rik	chr5	97392417	97588126	+	2995	TKO.DMSO.vs.J1.DMSO	-0.102078	-0.0748146	0.0208451	0.885202	0.942935	FALSE	NoSigChange
4930486L24Rik	chr13	60842612	60864416	-	1373	TKO.DMSO.vs.J1.DMSO	0.572489	2.35725	2.37912	0.122967	0.273575	FALSE	NoSigChange
4930500J02Rik	chr2	104559184	104571429	+	1145	TKO.DMSO.vs.J1.DMSO	0.956979	5.31511	16.315	5.36386e-05	0.000522253	FALSE	NoSigChange
4930502E18Rik	chrX	53724831	53738222	+	1203	TKO.DMSO.vs.J1.DMSO	0.473494	3.14794	1.10797	0.292523	0.49295	FALSE	NoSigChange
4930503E24Rik	chr10	124469074	124524488	+	1333	TKO.DMSO.vs.J1.DMSO	0.0174256	1.52959	0.00310773	0.955543	0.97937	FALSE	NoSigChange
4930503L19Rik	chr18	70453140	70472480	-	2291	TKO.DMSO.vs.J1.DMSO	-0.135191	4.81129	0.768639	0.380638	0.58022	FALSE	NoSigChange
4930504O13Rik	chr11	58446143	58452966	-	598	TKO.DMSO.vs.J1.DMSO	1.38114	-0.494043	1.71416	0.190446	0.369499	FALSE	NoSigChange
4930506M07Rik	chr19	58973358	59076069	-	4081	TKO.DMSO.vs.J1.DMSO	1.05824	4.59247	36.5467	1.49053e-09	4.7367e-08	TRUE	SigIncrease
4930507D05Rik	chr10	62449160	62451353	+	2194	TKO.DMSO.vs.J1.DMSO	0.228879	0.555937	0.389313	0.532661	0.715816	FALSE	NoSigChange
4930509E16Rik	chr9	72518250	72531858	-	1191	TKO.DMSO.vs.J1.DMSO	0.000173793	0.707925	2.4741e-07	0.999603	0.999866	FALSE	NoSigChange
4930513N10Rik	chr8	95806830	95821728	+	2803	TKO.DMSO.vs.J1.DMSO	-0.448454	1.30942	1.75352	0.185435	0.363514	FALSE	NoSigChange
4930515G01Rik	chr5	114773733	114774983	-	1251	TKO.DMSO.vs.J1.DMSO	0.354452	0.29888	0.469104	0.4934	0.683583	FALSE	NoSigChange
4930518P08Rik	chr13	50753393	50765248	-	1185	TKO.DMSO.vs.J1.DMSO	3.09296	-0.426413	8.3003	0.00396384	0.0199134	FALSE	NoSigChange
4930519F09Rik	chr10	28921963	28923507	-	1545	TKO.DMSO.vs.J1.DMSO	0.08607	-0.657726	0.0128112	0.909883	0.955103	FALSE	NoSigChange
4930519F16Rik	chrX	103232281	103256606	-	1166	TKO.DMSO.vs.J1.DMSO	-0.137838	1.92772	0.298843	0.584609	0.755425	FALSE	NoSigChange
4930520O04Rik	chr9	114368324	114377238	+	1255	TKO.DMSO.vs.J1.DMSO	1.50104	0.262245	9.28533	0.00230996	0.0128142	FALSE	NoSigChange
4930523C07Rik	chr1	160044380	160078586	+	5390	TKO.DMSO.vs.J1.DMSO	-2.12361	0.739572	10.5845	0.00114042	0.00709337	FALSE	NoSigChange
4930524B15Rik	chr11	31965633	31979651	+	1959	TKO.DMSO.vs.J1.DMSO	1.78876	1.93398	33.8093	6.0789e-09	1.6583e-07	TRUE	SigIncrease
4930524L23Rik	chrX	7573600	7581016	+	3456	TKO.DMSO.vs.J1.DMSO	1.02539	-0.291348	5.53478	0.0186421	0.0676288	FALSE	NoSigChange
4930525G20Rik	chr13	67796594	67830985	-	2987	TKO.DMSO.vs.J1.DMSO	0.459584	0.514268	1.06031	0.303144	0.503377	FALSE	NoSigChange
4930526I15Rik	chr9	124423256	124424856	+	1210	TKO.DMSO.vs.J1.DMSO	-0.992044	1.77759	9.7544	0.00178894	0.010358	FALSE	NoSigChange
4930526L06Rik	chr19	11196817	11299884	+	1020	TKO.DMSO.vs.J1.DMSO	0.0564759	2.19478	0.0555007	0.813754	0.902995	FALSE	NoSigChange
4930539E08Rik	chr17	28896395	28915324	-	4594	TKO.DMSO.vs.J1.DMSO	0.0651742	2.98679	0.10786	0.742594	0.860108	FALSE	NoSigChange
4930550C14Rik	chr9	53405286	53432803	+	1237	TKO.DMSO.vs.J1.DMSO	-0.621065	0.760459	2.09801	0.147491	0.309847	FALSE	NoSigChange
4930550L24Rik	chrX	58911461	58920304	+	1572	TKO.DMSO.vs.J1.DMSO	7.66703	4.37871	214.908	1.16745e-48	1.48091e-45	TRUE	SigIncrease
4930556M19Rik	chr15	10714836	10790123	+	4350	TKO.DMSO.vs.J1.DMSO	-0.188408	1.04055	0.269954	0.603363	0.768375	FALSE	NoSigChange
4930558C23Rik	chr3	95386458	95402841	-	734	TKO.DMSO.vs.J1.DMSO	3.33907	0.280447	24.0562	9.35638e-07	1.52324e-05	FALSE	NoSigChange
4930558J18Rik	chr1	57359222	57377544	-	2052	TKO.DMSO.vs.J1.DMSO	-0.0545285	2.69522	0.0486806	0.825375	0.910755	FALSE	NoSigChange
4930563E22Rik	chr11	72215138	72218450	+	3313	TKO.DMSO.vs.J1.DMSO	-0.135076	1.94786	0.147107	0.701315	0.834824	FALSE	NoSigChange
4930579G24Rik	chr3	79629079	79632819	+	1969	TKO.DMSO.vs.J1.DMSO	0.105696	4.24804	0.467111	0.494319	0.684245	FALSE	NoSigChange
4930579K19Rik	chr9	98562460	98563611	-	1152	TKO.DMSO.vs.J1.DMSO	0.34024	0.699635	0.467135	0.494308	0.684245	FALSE	NoSigChange
4930591A17Rik	chr2	179414936	179416880	+	735	TKO.DMSO.vs.J1.DMSO	2.50829	1.16559	14.7038	0.000125792	0.00108858	FALSE	NoSigChange
4930594C11Rik	chr1	37485851	37488605	-	2755	TKO.DMSO.vs.J1.DMSO	-0.332475	0.440305	0.445618	0.504423	0.69224	FALSE	NoSigChange
4931406C07Rik	chr9	15283337	15306448	-	2981	TKO.DMSO.vs.J1.DMSO	0.000890678	3.70213	2.67246e-05	0.995875	0.997448	FALSE	NoSigChange
4931406P16Rik	chr7	34236714	34285609	-	5808	TKO.DMSO.vs.J1.DMSO	0.130564	7.26867	1.034	0.30922	0.5093	FALSE	NoSigChange
4931414P19Rik	chr14	54583663	54605908	-	2585	TKO.DMSO.vs.J1.DMSO	-0.262783	3.876	1.63784	0.200622	0.383003	FALSE	NoSigChange
4931428F04Rik	chr8	105280409	105289528	-	3553	TKO.DMSO.vs.J1.DMSO	-0.808743	3.03773	14.969	0.000109293	0.000971191	FALSE	NoSigChange
4931440F15Rik	chr11	29822395	29825668	-	3274	TKO.DMSO.vs.J1.DMSO	0.220737	0.446471	0.162745	0.686642	0.825458	FALSE	NoSigChange
4931440L10Rik	chr1	134540945	134547022	-	1457	TKO.DMSO.vs.J1.DMSO	0.137653	0.384001	0.107934	0.742508	0.860108	FALSE	NoSigChange
4932412D23Rik	chr16	42725702	42875762	-	4820	TKO.DMSO.vs.J1.DMSO	1.79632	1.30803	14.6793	0.000127437	0.00110156	FALSE	NoSigChange
4932415G12Rik	chr10	94673493	94688613	-	4135	TKO.DMSO.vs.J1.DMSO	-0.0118338	0.68011	0.000453774	0.983005	0.992686	FALSE	NoSigChange
4932416H05Rik	chr2	129798369	129801459	-	3091	TKO.DMSO.vs.J1.DMSO	0.381904	1.40647	1.01658	0.313332	0.51324	FALSE	NoSigChange
4932418E24Rik	chr2	26271647	26294557	-	3147	TKO.DMSO.vs.J1.DMSO	-0.225166	-0.171764	0.189605	0.663245	0.810202	FALSE	NoSigChange
4932438A13Rik	chr3	36863106	37053033	+	15883	TKO.DMSO.vs.J1.DMSO	-0.0604689	7.85363	0.242223	0.622605	0.781955	FALSE	NoSigChange
4933402E13Rik	chrX	62283499	62292078	+	2025	TKO.DMSO.vs.J1.DMSO	-0.113856	4.15384	0.238668	0.62517	0.783625	FALSE	NoSigChange
4933403G14Rik	chr8	125669818	125673365	+	3548	TKO.DMSO.vs.J1.DMSO	-0.769409	4.41108	16.5146	4.82764e-05	0.000478115	FALSE	NoSigChange
4933403O08Rik	chrX	112239049	112243852	+	1520	TKO.DMSO.vs.J1.DMSO	0.250583	-0.210931	0.114056	0.735573	0.856097	FALSE	NoSigChange
4933404O12Rik	chr5	136919146	136937109	+	3970	TKO.DMSO.vs.J1.DMSO	-0.544222	4.8634	15.4245	8.58687e-05	0.000786931	FALSE	NoSigChange
4933406J08Rik	chr2	122186272	122206393	+	2111	TKO.DMSO.vs.J1.DMSO	2.50614	3.04201	41.076	1.46424e-10	5.50337e-09	TRUE	SigIncrease
4933407K13Rik	chrX	75725458	75764699	-	3376	TKO.DMSO.vs.J1.DMSO	-0.112582	2.20742	0.177245	0.673752	0.817656	FALSE	NoSigChange
4933408N05Rik	chr8	114341161	114351478	-	1582	TKO.DMSO.vs.J1.DMSO	1.24165	-0.51145	1.55512	0.212381	0.398333	FALSE	NoSigChange
4933411G11Rik	chr5	143181017	143205068	+	2158	TKO.DMSO.vs.J1.DMSO	0.36496	-0.638469	0.187841	0.66472	0.811376	FALSE	NoSigChange
4933411K20Rik	chr8	46169556	46195590	+	4523	TKO.DMSO.vs.J1.DMSO	0.326768	5.92356	7.62754	0.00574837	0.0267835	FALSE	NoSigChange
4933412E12Rik	chr10	116950562	116963279	+	1724	TKO.DMSO.vs.J1.DMSO	-2.31151	0.77838	26.9166	2.12424e-07	4.00188e-06	TRUE	SigDecrease
4933413J09Rik	chr14	26357547	26400456	+	3387	TKO.DMSO.vs.J1.DMSO	-0.540361	1.01132	0.810886	0.367859	0.569225	FALSE	NoSigChange
4933416C03Rik	chr10	116111664	116113917	-	2254	TKO.DMSO.vs.J1.DMSO	-0.229021	0.0718265	0.114262	0.735343	0.855895	FALSE	NoSigChange
4933416M07Rik	chr8	27142910	27149706	+	1520	TKO.DMSO.vs.J1.DMSO	-1.3651	0.937684	9.08005	0.00258413	0.0140434	FALSE	NoSigChange
4933421O10Rik	chr4	33027139	33031323	-	3850	TKO.DMSO.vs.J1.DMSO	-0.14117	0.152729	0.141363	0.70693	0.837632	FALSE	NoSigChange
4933425L06Rik	chr13	105082122	105121782	+	2157	TKO.DMSO.vs.J1.DMSO	3.60397	1.48491	26.3186	2.89485e-07	5.32835e-06	TRUE	SigIncrease
4933426M11Rik	chr12	80790532	80880833	+	5065	TKO.DMSO.vs.J1.DMSO	0.0546952	6.57331	0.182652	0.669104	0.814157	FALSE	NoSigChange
4933427D06Rik	chr6	89096115	89110037	+	2621	TKO.DMSO.vs.J1.DMSO	1.7553	4.19166	16.8775	3.98707e-05	0.000405961	FALSE	NoSigChange
4933427D14Rik	chr11	72154097	72203371	-	4332	TKO.DMSO.vs.J1.DMSO	-0.0792628	4.80757	0.256135	0.612788	0.775899	FALSE	NoSigChange
4933430I17Rik	chr4	62525369	62547993	+	1783	TKO.DMSO.vs.J1.DMSO	-0.443515	1.00101	1.26699	0.260332	0.456909	FALSE	NoSigChange
4933431E20Rik	chr3	107888850	107896213	-	5407	TKO.DMSO.vs.J1.DMSO	0.221148	2.86389	0.478082	0.489292	0.680581	FALSE	NoSigChange
4933433G15Rik	chr9	75410184	75415537	+	1153	TKO.DMSO.vs.J1.DMSO	-0.264249	0.886281	0.453881	0.500497	0.689073	FALSE	NoSigChange
4933433G19Rik	chr13	66996818	67032405	-	1061	TKO.DMSO.vs.J1.DMSO	-1.29651	-0.0691336	6.28045	0.0122077	0.0486791	FALSE	NoSigChange
4933434E20Rik	chr3	90052817	90062447	+	1912	TKO.DMSO.vs.J1.DMSO	-0.0386514	4.68518	0.0737398	0.785967	0.885435	FALSE	NoSigChange
4933434I20Rik	chr8	83348472	83379402	+	1292	TKO.DMSO.vs.J1.DMSO	1.6944	0.014979	7.6698	0.00561525	0.0263325	FALSE	NoSigChange
4933436C20Rik	chr8	92326033	92356120	-	1243	TKO.DMSO.vs.J1.DMSO	0.771889	1.61887	6.40961	0.0113504	0.0459512	FALSE	NoSigChange
4933439C10Rik	chr11	59505685	59511067	+	1877	TKO.DMSO.vs.J1.DMSO	-0.480196	1.99844	3.60392	0.0576437	0.159129	FALSE	NoSigChange
5031414D18Rik	chr14	75016027	75052532	+	2651	TKO.DMSO.vs.J1.DMSO	-0.0884861	-0.460239	0.00272052	0.958402	0.98063	FALSE	NoSigChange
5031425E22Rik	chr5	23431808	23434353	-	2546	TKO.DMSO.vs.J1.DMSO	0.0838856	4.27846	0.332278	0.564321	0.7411	FALSE	NoSigChange
5031434C07Rik	chr6	112286794	112290319	-	2116	TKO.DMSO.vs.J1.DMSO	2.76065	-0.377125	10.2237	0.00138647	0.00840495	FALSE	NoSigChange
5031439G07Rik	chr15	84945720	84987971	-	5032	TKO.DMSO.vs.J1.DMSO	-0.0805207	6.19071	0.463624	0.495935	0.685287	FALSE	NoSigChange
5033406O09Rik	chr12	111941991	111944482	-	1729	TKO.DMSO.vs.J1.DMSO	-1.00751	1.32799	4.0538	0.044072	0.130926	FALSE	NoSigChange
5330411J11Rik	chr2	59382493	59386682	-	1644	TKO.DMSO.vs.J1.DMSO	0.909446	2.10686	10.1536	0.0014402	0.00869093	FALSE	NoSigChange
5330417C22Rik	chr3	108458069	108536522	-	3326	TKO.DMSO.vs.J1.DMSO	-0.350767	0.301867	0.427557	0.51319	0.699855	FALSE	NoSigChange
5330426P16Rik	chr16	50726751	50732773	-	1815	TKO.DMSO.vs.J1.DMSO	0.309324	2.1596	0.878492	0.348615	0.550702	FALSE	NoSigChange
5330434G04Rik	chrX	105372994	105391754	-	3449	TKO.DMSO.vs.J1.DMSO	-1.01541	0.401668	3.9364	0.0472519	0.137501	FALSE	NoSigChange
5430402O13Rik	chr6	50566643	50594865	+	1007	TKO.DMSO.vs.J1.DMSO	0.504163	2.66541	0.58167	0.445658	0.641071	FALSE	NoSigChange
5430405H02Rik	chr2	156852403	156862945	-	1509	TKO.DMSO.vs.J1.DMSO	0.594005	0.71791	1.65976	0.197636	0.378894	FALSE	NoSigChange
5430416N02Rik	chr5	100420842	100429535	-	626	TKO.DMSO.vs.J1.DMSO	-0.088514	4.58078	0.396921	0.528684	0.712179	FALSE	NoSigChange
5430417L22Rik	chr2	118745762	118748807	+	3046	TKO.DMSO.vs.J1.DMSO	1.3413	2.8632	21.891	2.88579e-06	4.08248e-05	FALSE	NoSigChange
5430435G22Rik	chr1	131688695	131713464	+	2523	TKO.DMSO.vs.J1.DMSO	-0.566136	-0.49444	0.456912	0.499071	0.687498	FALSE	NoSigChange
5530601H04Rik	chrX	105040854	105070124	-	3732	TKO.DMSO.vs.J1.DMSO	0.0398803	3.26719	0.0441911	0.833499	0.914933	FALSE	NoSigChange
5730405O15Rik	chrX	13042015	13045295	+	887	TKO.DMSO.vs.J1.DMSO	0.356376	1.60735	1.77101	0.183257	0.361013	FALSE	NoSigChange
5730408K05Rik	chr19	8888387	8888770	-	384	TKO.DMSO.vs.J1.DMSO	0.371733	5.09092	4.74738	0.029343	0.0964497	FALSE	NoSigChange
5730409E04Rik	chr4	126609854	126614371	+	2855	TKO.DMSO.vs.J1.DMSO	-0.242201	2.49466	1.18081	0.277191	0.476877	FALSE	NoSigChange
5730455P16Rik	chr11	80360492	80378015	-	4536	TKO.DMSO.vs.J1.DMSO	0.0622684	5.44646	0.14428	0.704063	0.836011	FALSE	NoSigChange
5730480H06Rik	chr5	48395573	48414294	+	1735	TKO.DMSO.vs.J1.DMSO	0.460409	1.87839	2.90643	0.0882269	0.216878	FALSE	NoSigChange
5730508B09Rik	chr3	127869688	127896323	-	1603	TKO.DMSO.vs.J1.DMSO	0.594166	2.40691	4.57508	0.0324402	0.103806	FALSE	NoSigChange
5730559C18Rik	chr1	136213522	136234280	-	3013	TKO.DMSO.vs.J1.DMSO	-0.782944	3.78686	18.1081	2.08711e-05	0.000234465	FALSE	NoSigChange
5730577I03Rik	chr9	20607475	20617271	+	2355	TKO.DMSO.vs.J1.DMSO	0.368219	0.345125	0.7193	0.396374	0.596206	FALSE	NoSigChange
5830415F09Rik	chr4	46376975	46389423	-	1558	TKO.DMSO.vs.J1.DMSO	-0.371458	4.38837	6.26488	0.0123155	0.0489852	FALSE	NoSigChange
5830417I10Rik	chr3	88777057	88829371	+	9833	TKO.DMSO.vs.J1.DMSO	0.0669962	5.3137	0.228112	0.632927	0.789243	FALSE	NoSigChange
5830418K08Rik	chr9	15316914	15357788	-	7371	TKO.DMSO.vs.J1.DMSO	0.107211	7.41237	0.968421	0.325074	0.526077	FALSE	NoSigChange
5830418P13Rik	chr9	103423578	103461260	+	2178	TKO.DMSO.vs.J1.DMSO	0.671743	1.00551	3.34881	0.0672537	0.178281	FALSE	NoSigChange
5830454E08Rik	chr9	120577331	120578073	+	743	TKO.DMSO.vs.J1.DMSO	-0.212481	0.537049	0.32477	0.568755	0.744564	FALSE	NoSigChange
5930412G12Rik	chr5	128579130	128600687	-	2405	TKO.DMSO.vs.J1.DMSO	-0.884727	0.914553	5.325	0.0210216	0.0745032	FALSE	NoSigChange
6030407O03Rik	chr1	73618381	73864466	-	1801	TKO.DMSO.vs.J1.DMSO	0.875775	1.64676	1.25338	0.262907	0.460315	FALSE	NoSigChange
6030419C18Rik	chr9	58488603	58499742	+	2139	TKO.DMSO.vs.J1.DMSO	0.161933	1.69529	0.295133	0.58695	0.757159	FALSE	NoSigChange
6030458C11Rik	chr15	12808177	12824657	-	5474	TKO.DMSO.vs.J1.DMSO	-0.214671	6.44263	3.39724	0.0653058	0.174278	FALSE	NoSigChange
6230400D17Rik	chr14	20702012	20703099	-	1088	TKO.DMSO.vs.J1.DMSO	-0.195605	1.01046	0.284038	0.594067	0.761634	FALSE	NoSigChange
6330403A02Rik	chr1	180432373	180483504	-	6557	TKO.DMSO.vs.J1.DMSO	1.9392	-0.315958	4.80707	0.0283431	0.0938734	FALSE	NoSigChange
6330403K07Rik	chr11	71031941	71033617	-	1598	TKO.DMSO.vs.J1.DMSO	0.262542	3.24285	0.727257	0.393774	0.593291	FALSE	NoSigChange
6330403M23Rik	chr18	36300101	36301478	+	1378	TKO.DMSO.vs.J1.DMSO	0.581136	1.54528	3.63037	0.0567342	0.157191	FALSE	NoSigChange
6330408A02Rik	chr7	13258967	13278721	-	3347	TKO.DMSO.vs.J1.DMSO	0.207968	2.23231	0.633942	0.425913	0.623929	FALSE	NoSigChange
6330410L21Rik	chr3	129753758	129763882	+	3869	TKO.DMSO.vs.J1.DMSO	2.28925	1.56058	49.1269	2.39933e-12	1.25507e-10	TRUE	SigIncrease
6330416G13Rik	chr4	63560360	63586353	+	3630	TKO.DMSO.vs.J1.DMSO	-0.0524068	3.25813	0.085186	0.770389	0.875727	FALSE	NoSigChange
6330418K02Rik	chr5	138264045	138266661	+	741	TKO.DMSO.vs.J1.DMSO	-0.575426	1.22349	3.28089	0.0700909	0.183352	FALSE	NoSigChange
6330549D23Rik	chr3	96606662	96629819	-	2828	TKO.DMSO.vs.J1.DMSO	-0.493577	3.15693	6.10913	0.0134485	0.0526391	FALSE	NoSigChange
6430411K18Rik	chr12	109591537	109592851	+	1315	TKO.DMSO.vs.J1.DMSO	0.729954	4.72555	4.79723	0.0285055	0.09423	FALSE	NoSigChange
6430531B16Rik	chr7	139972303	139978755	-	1161	TKO.DMSO.vs.J1.DMSO	0.34285	0.985712	0.648952	0.420488	0.61884	FALSE	NoSigChange
6430548M08Rik	chr8	120114152	120165307	+	6284	TKO.DMSO.vs.J1.DMSO	0.0906295	2.32719	0.0368803	0.847709	0.92269	FALSE	NoSigChange
6430571L13Rik	chr9	107340640	107349683	+	2552	TKO.DMSO.vs.J1.DMSO	-0.0990583	0.76079	0.046379	0.829488	0.912845	FALSE	NoSigChange
6430573F11Rik	chr8	36489191	36513013	+	1825	TKO.DMSO.vs.J1.DMSO	-1.56133	1.75313	14.7465	0.000122974	0.00106966	FALSE	NoSigChange
6720401G13Rik	chrX	50555744	50635258	-	6565	TKO.DMSO.vs.J1.DMSO	-0.598916	6.16372	21.3035	3.92024e-06	5.38088e-05	FALSE	NoSigChange
6720456H20Rik	chr14	48446352	48515159	+	5218	TKO.DMSO.vs.J1.DMSO	0.481786	3.48588	4.01194	0.0451791	0.133311	FALSE	NoSigChange
6720489N17Rik	chr13	62603015	62624182	-	2638	TKO.DMSO.vs.J1.DMSO	-0.111095	3.93776	0.41962	0.517127	0.702746	FALSE	NoSigChange
6820431F20Rik	chr8	20268286	20297432	-	4659	TKO.DMSO.vs.J1.DMSO	-0.129088	3.17355	0.493157	0.482522	0.675647	FALSE	NoSigChange
8030462N17Rik	chr18	77633281	77714010	-	3418	TKO.DMSO.vs.J1.DMSO	-0.162093	6.87081	2.28891	0.130302	0.284856	FALSE	NoSigChange
8430410A17Rik	chr6	87913976	87936613	+	1407	TKO.DMSO.vs.J1.DMSO	0.0915316	6.36193	0.459828	0.497704	0.686665	FALSE	NoSigChange
8430419L09Rik	chr6	135197987	135236240	+	4209	TKO.DMSO.vs.J1.DMSO	0.927137	3.99786	18.5134	1.68717e-05	0.000195153	FALSE	NoSigChange
8430427H17Rik	chr2	153407461	153529971	-	6523	TKO.DMSO.vs.J1.DMSO	1.01873	3.39933	17.2402	3.29389e-05	0.000345314	FALSE	NoSigChange
8430429K09Rik	chr11	3452437	3479831	+	2583	TKO.DMSO.vs.J1.DMSO	-0.373466	1.62037	1.59371	0.206797	0.391477	FALSE	NoSigChange
9030025P20Rik	chr17	14978864	14991577	+	2120	TKO.DMSO.vs.J1.DMSO	0.157171	1.14544	0.162993	0.686416	0.825458	FALSE	NoSigChange
9030617O03Rik	chr12	100779123	100872610	+	3229	TKO.DMSO.vs.J1.DMSO	1.91741	2.49033	55.7208	8.35291e-14	5.50424e-12	TRUE	SigIncrease
9030624G23Rik	chr12	24043202	24097269	-	2268	TKO.DMSO.vs.J1.DMSO	-0.290612	1.24341	0.756939	0.384288	0.5838	FALSE	NoSigChange
9030624J02Rik	chr7	118740271	118841491	+	3577	TKO.DMSO.vs.J1.DMSO	-0.432328	6.0379	10.4308	0.00123931	0.00763753	FALSE	NoSigChange
9130008F23Rik	chr17	40875482	40880558	-	2159	TKO.DMSO.vs.J1.DMSO	-3.3239	1.89562	61.6037	4.20021e-15	3.27875e-13	TRUE	SigDecrease
9130011E15Rik	chr19	45818144	45998488	-	2896	TKO.DMSO.vs.J1.DMSO	-0.0239316	5.07199	0.034063	0.853573	0.926093	FALSE	NoSigChange
9130017N09Rik	chr10	79821021	79830452	+	2427	TKO.DMSO.vs.J1.DMSO	1.43875	1.95113	25.1205	5.38566e-07	9.29484e-06	TRUE	SigIncrease
9130019O22Rik	chr7	127382260	127387166	-	3878	TKO.DMSO.vs.J1.DMSO	-0.0291688	3.3134	0.0218455	0.882499	0.941439	FALSE	NoSigChange
9130023H24Rik	chr7	128234451	128238031	-	3581	TKO.DMSO.vs.J1.DMSO	-0.370765	2.63401	2.28665	0.130491	0.285065	FALSE	NoSigChange
9130206I24Rik	chr4	114909289	114921118	+	2876	TKO.DMSO.vs.J1.DMSO	-1.37011	0.256611	2.86368	0.0905998	0.221153	FALSE	NoSigChange
9130221H12Rik	chr7	25228723	25230264	+	1542	TKO.DMSO.vs.J1.DMSO	0.255269	2.57956	1.16302	0.280841	0.480693	FALSE	NoSigChange
9130227L01Rik	chr1	55931241	55972098	+	1906	TKO.DMSO.vs.J1.DMSO	1.29554	0.0461951	0.798724	0.371475	0.571778	FALSE	NoSigChange
9130401M01Rik	chr15	58022271	58034294	-	1308	TKO.DMSO.vs.J1.DMSO	-0.130927	6.84029	1.57418	0.209601	0.395115	FALSE	NoSigChange
9230110C19Rik	chr9	8021672	8042823	-	1592	TKO.DMSO.vs.J1.DMSO	-0.0551679	3.46039	0.080377	0.776787	0.879121	FALSE	NoSigChange
9230114K14Rik	chr5	52190681	52197984	+	2118	TKO.DMSO.vs.J1.DMSO	-0.486864	3.81051	7.34563	0.0067226	0.0302487	FALSE	NoSigChange
9230116N13Rik	chr1	136411916	136415519	-	2097	TKO.DMSO.vs.J1.DMSO	-0.224489	0.909342	0.367727	0.544246	0.725629	FALSE	NoSigChange
9330020H09Rik	chr15	98567324	98570864	+	3428	TKO.DMSO.vs.J1.DMSO	0.0839947	2.73592	0.08297	0.773312	0.877477	FALSE	NoSigChange
9330133O14Rik	chr8	122443656	122446476	+	2821	TKO.DMSO.vs.J1.DMSO	-1.0288	2.75175	16.9019	3.93623e-05	0.000401591	FALSE	NoSigChange
9330151L19Rik	chr12	69197211	69199868	+	2546	TKO.DMSO.vs.J1.DMSO	0.19873	1.90075	0.573599	0.448832	0.644357	FALSE	NoSigChange
9330159F19Rik	chr10	29211643	29230779	+	5644	TKO.DMSO.vs.J1.DMSO	0.920038	1.24668	5.08726	0.0241022	0.0828741	FALSE	NoSigChange
9330159M07Rik	chr9	88841798	88858870	-	2818	TKO.DMSO.vs.J1.DMSO	0.196712	1.57888	0.399064	0.527573	0.711505	FALSE	NoSigChange
9330182L06Rik	chr5	9266193	9480717	+	4627	TKO.DMSO.vs.J1.DMSO	0.452374	2.82297	3.05658	0.0804106	0.20245	FALSE	NoSigChange
9430008C03Rik	chr2	158353700	158361522	-	3172	TKO.DMSO.vs.J1.DMSO	-0.00387511	5.88013	0.000912104	0.975907	0.989193	FALSE	NoSigChange
9430015G10Rik	chr4	156109998	156127263	+	2660	TKO.DMSO.vs.J1.DMSO	-0.0105193	5.53161	0.00602764	0.938116	0.969977	FALSE	NoSigChange
9430016H08Rik	chr1	57406548	57415958	+	1325	TKO.DMSO.vs.J1.DMSO	0.123742	4.25096	0.58955	0.442593	0.638405	FALSE	NoSigChange
9430018G01Rik	chr6	43442429	43474318	+	4095	TKO.DMSO.vs.J1.DMSO	2.68154	0.493936	13.4729	0.000242027	0.00192083	FALSE	NoSigChange
9430020K01Rik	chr18	4634929	4682869	+	6731	TKO.DMSO.vs.J1.DMSO	0.206619	5.06978	1.74137	0.186965	0.36579	FALSE	NoSigChange
9430023L20Rik	chr15	101284301	101290934	+	1230	TKO.DMSO.vs.J1.DMSO	-0.108588	6.84967	0.776141	0.378324	0.578113	FALSE	NoSigChange
9430037G07Rik	chr9	88595325	88599243	-	3177	TKO.DMSO.vs.J1.DMSO	0.437601	1.85181	1.92864	0.164907	0.335054	FALSE	NoSigChange
9430038I01Rik	chr7	137375569	137410756	-	1125	TKO.DMSO.vs.J1.DMSO	0.411161	3.51647	2.66004	0.102898	0.241343	FALSE	NoSigChange
9430060I03Rik	chr1	92933543	92950590	-	1672	TKO.DMSO.vs.J1.DMSO	0.286925	0.486129	0.444428	0.504993	0.69266	FALSE	NoSigChange
9430069I07Rik	chr15	34349051	34357872	-	572	TKO.DMSO.vs.J1.DMSO	-1.46242	0.331557	13.053	0.000302804	0.00231972	FALSE	NoSigChange
9430083A17Rik	chr13	51097738	51100727	-	2990	TKO.DMSO.vs.J1.DMSO	0.369976	1.97964	1.7007	0.192196	0.371778	FALSE	NoSigChange
9430091E24Rik	chr8	111127444	111145498	-	2671	TKO.DMSO.vs.J1.DMSO	-0.534941	0.675477	1.52763	0.216468	0.403858	FALSE	NoSigChange
9530053A07Rik	chr7	28129466	28164811	+	7922	TKO.DMSO.vs.J1.DMSO	0.817447	2.16696	7.88991	0.00497115	0.0238648	FALSE	NoSigChange
9530059O14Rik	chr9	122572501	122580647	+	3978	TKO.DMSO.vs.J1.DMSO	0.623365	1.75864	2.20287	0.137754	0.294879	FALSE	NoSigChange
9530068E07Rik	chr11	52396428	52408723	+	2467	TKO.DMSO.vs.J1.DMSO	-0.369404	5.16167	5.57523	0.0182163	0.0664482	FALSE	NoSigChange
9530077C05Rik	chr9	22411577	22444679	+	2157	TKO.DMSO.vs.J1.DMSO	0.665681	3.30476	4.32021	0.0376623	0.116334	FALSE	NoSigChange
9530082P21Rik	chr17	23749236	23754065	+	3162	TKO.DMSO.vs.J1.DMSO	-0.0960135	1.56807	0.0803381	0.77684	0.879121	FALSE	NoSigChange
9530091C08Rik	chr9	68765346	68773322	+	7977	TKO.DMSO.vs.J1.DMSO	-0.434902	0.255685	1.08764	0.296995	0.497067	FALSE	NoSigChange
9630033F20Rik	chr6	127085116	127109552	-	3653	TKO.DMSO.vs.J1.DMSO	-0.000258329	6.10451	4.26152e-06	0.998353	0.999206	FALSE	NoSigChange
9830001H06Rik	chr2	157010442	157079265	-	13232	TKO.DMSO.vs.J1.DMSO	0.0649932	5.23309	0.173552	0.676974	0.819931	FALSE	NoSigChange
9830147E19Rik	chr7	42609526	42642604	-	5011	TKO.DMSO.vs.J1.DMSO	0.233396	5.07505	1.79587	0.180213	0.35641	FALSE	NoSigChange
9930012K11Rik	chr14	70154405	70159502	-	1986	TKO.DMSO.vs.J1.DMSO	-0.713364	3.54605	10.1526	0.00144095	0.00869093	FALSE	NoSigChange
9930013L23Rik	chr7	83932857	84086505	-	7114	TKO.DMSO.vs.J1.DMSO	0.0597273	2.48017	0.0387906	0.843864	0.920431	FALSE	NoSigChange
9930014A18Rik	chr15	60822965	60831400	+	5130	TKO.DMSO.vs.J1.DMSO	-2.41855	1.20967	52.3708	4.59512e-13	2.74302e-11	TRUE	SigDecrease
9930021J03Rik	chr19	29714402	29806009	-	8026	TKO.DMSO.vs.J1.DMSO	0.141346	5.89051	1.29939	0.254324	0.450032	FALSE	NoSigChange
9930104L06Rik	chr4	124937048	124944661	+	2942	TKO.DMSO.vs.J1.DMSO	-0.00267811	4.6488	0.000209003	0.988465	0.994345	FALSE	NoSigChange
A030009H04Rik	chr11	69340769	69342647	+	1779	TKO.DMSO.vs.J1.DMSO	0.144188	2.91323	0.315474	0.57434	0.748255	FALSE	NoSigChange
A130010J15Rik	chr1	193173469	193177832	+	3834	TKO.DMSO.vs.J1.DMSO	-0.0607982	5.02974	0.178049	0.673055	0.817167	FALSE	NoSigChange
A130049A11Rik	chr3	103964536	103968316	-	3781	TKO.DMSO.vs.J1.DMSO	-0.052497	1.775	0.0303078	0.861794	0.929975	FALSE	NoSigChange
A230046K03Rik	chr10	83543941	83596473	+	5858	TKO.DMSO.vs.J1.DMSO	0.356145	7.95064	6.2225	0.0126137	0.0499364	FALSE	NoSigChange
A230050P20Rik	chr9	20868642	20874307	+	1683	TKO.DMSO.vs.J1.DMSO	-0.0272888	3.29313	0.0137503	0.906653	0.953573	FALSE	NoSigChange
A230070E04Rik	chr14	68123752	68131371	+	1851	TKO.DMSO.vs.J1.DMSO	1.47186	0.230884	4.19866	0.0404558	0.122649	FALSE	NoSigChange
A230072C01Rik	chrX	20961676	20987349	+	2201	TKO.DMSO.vs.J1.DMSO	0.0987692	2.06752	0.120895	0.728065	0.851465	FALSE	NoSigChange
A2m	chr6	121636173	121679238	+	4671	TKO.DMSO.vs.J1.DMSO	2.21743	3.5071	82.1545	1.25853e-19	1.80729e-17	TRUE	SigIncrease
A330009N23Rik	chr15	101221191	101225186	-	1776	TKO.DMSO.vs.J1.DMSO	0.42218	0.758952	1.10593	0.292967	0.493313	FALSE	NoSigChange
A330021E22Rik	chr5	5580982	5664232	-	3245	TKO.DMSO.vs.J1.DMSO	0.832652	2.46403	7.69067	0.00555071	0.0260781	FALSE	NoSigChange
A330023F24Rik	chr1	195017399	195037908	+	5195	TKO.DMSO.vs.J1.DMSO	1.49027	2.723	27.507	1.56527e-07	3.05077e-06	TRUE	SigIncrease
A330035P11Rik	chr14	122097939	122106974	-	2711	TKO.DMSO.vs.J1.DMSO	0.502354	1.0475	1.4578	0.227281	0.416928	FALSE	NoSigChange
A330069E16Rik	chr2	91237146	91238357	+	892	TKO.DMSO.vs.J1.DMSO	-0.182503	0.208593	0.105895	0.744867	0.861382	FALSE	NoSigChange
A330102I10Rik	chr13	29014414	29040336	+	1419	TKO.DMSO.vs.J1.DMSO	2.82127	-0.69352	18.2013	1.98739e-05	0.00022509	FALSE	NoSigChange
A430005L14Rik	chr4	153957237	153961924	+	1097	TKO.DMSO.vs.J1.DMSO	-0.401406	5.54103	10.1603	0.00143501	0.00866812	FALSE	NoSigChange
A430033K04Rik	chr5	138622859	138648905	+	3142	TKO.DMSO.vs.J1.DMSO	-0.156659	3.24148	0.541545	0.461793	0.656771	FALSE	NoSigChange
A430105I19Rik	chr2	118754145	118762661	-	4716	TKO.DMSO.vs.J1.DMSO	0.317492	1.61858	0.923361	0.336594	0.538706	FALSE	NoSigChange
A4galt	chr15	83226722	83251774	-	2175	TKO.DMSO.vs.J1.DMSO	-0.311238	4.68322	2.89788	0.088696	0.217658	FALSE	NoSigChange
A530054K11Rik	chr13	67617001	67637753	-	5179	TKO.DMSO.vs.J1.DMSO	0.27925	5.55609	2.13498	0.143972	0.304381	FALSE	NoSigChange
A630001G21Rik	chr1	85717083	85736606	-	1936	TKO.DMSO.vs.J1.DMSO	-1.04909	0.622406	4.52972	0.033311	0.106013	FALSE	NoSigChange
A630007B06Rik	chr19	56790963	56813683	-	2754	TKO.DMSO.vs.J1.DMSO	-0.0468728	4.78295	0.114796	0.734749	0.855611	FALSE	NoSigChange
A630019I02Rik	chr13	93094833	93098968	+	2990	TKO.DMSO.vs.J1.DMSO	1.2601	1.02826	7.82503	0.00515276	0.0245956	FALSE	NoSigChange
A630020A06	chr15	3996039	4015858	+	3526	TKO.DMSO.vs.J1.DMSO	0.210674	1.53254	0.305504	0.580453	0.752611	FALSE	NoSigChange
A630066F11Rik	chr10	7663371	7664623	+	1253	TKO.DMSO.vs.J1.DMSO	0.210006	1.47524	0.29091	0.589638	0.758896	FALSE	NoSigChange
A630072M18Rik	chr5	20950989	20956398	+	5410	TKO.DMSO.vs.J1.DMSO	0.241778	3.58219	1.86061	0.172555	0.345563	FALSE	NoSigChange
A630089N07Rik	chr16	98062512	98082439	-	2131	TKO.DMSO.vs.J1.DMSO	0.190391	4.14605	0.989589	0.319843	0.520587	FALSE	NoSigChange
A730017C20Rik	chr18	59062381	59076960	+	1941	TKO.DMSO.vs.J1.DMSO	2.09431	-0.564087	4.85785	0.0275206	0.0918682	FALSE	NoSigChange
A730017L22Rik	chr2	130872541	130906396	-	2375	TKO.DMSO.vs.J1.DMSO	-0.375139	0.386951	0.458843	0.498165	0.686748	FALSE	NoSigChange
A730036I17Rik	chr2	129218969	129235606	+	3433	TKO.DMSO.vs.J1.DMSO	1.53535	0.762009	13.8915	0.000193676	0.00158246	FALSE	NoSigChange
A730046J19Rik	chrX	144153695	144166274	+	4707	TKO.DMSO.vs.J1.DMSO	2.35479	-0.375843	11.4689	0.000707714	0.00472078	FALSE	NoSigChange
A730085A09Rik	chr4	98793768	98799037	+	2388	TKO.DMSO.vs.J1.DMSO	2.26605	2.40953	47.452	5.63675e-12	2.79487e-10	TRUE	SigIncrease
A730090N16Rik	chr3	65324020	65349429	-	1383	TKO.DMSO.vs.J1.DMSO	1.01243	-0.0535828	3.69803	0.0544767	0.152856	FALSE	NoSigChange
A730098P11Rik	chr16	24529314	24534472	+	5159	TKO.DMSO.vs.J1.DMSO	-0.000587999	4.36481	1.22513e-05	0.997207	0.998454	FALSE	NoSigChange
A830010M20Rik	chr5	107497745	107512556	+	6756	TKO.DMSO.vs.J1.DMSO	0.180778	4.15072	0.842486	0.358687	0.560683	FALSE	NoSigChange
A830018L16Rik	chr1	11414105	11975902	+	8293	TKO.DMSO.vs.J1.DMSO	0.135407	3.21653	0.324666	0.568817	0.744564	FALSE	NoSigChange
A830080D01Rik	chrX	159532668	159593081	+	3366	TKO.DMSO.vs.J1.DMSO	0.157414	6.48591	0.982021	0.3217	0.52284	FALSE	NoSigChange
A830082N09Rik	chr10	33987216	33995055	-	7840	TKO.DMSO.vs.J1.DMSO	0.390683	2.93978	2.04263	0.152945	0.31805	FALSE	NoSigChange
A930001C03Rik	chr19	4439323	4448325	+	1193	TKO.DMSO.vs.J1.DMSO	-0.364626	1.39001	1.02438	0.311483	0.511753	FALSE	NoSigChange
A930004D18Rik	chr2	18025189	18037741	-	3643	TKO.DMSO.vs.J1.DMSO	1.07856	1.82115	15.1105	0.000101397	0.000907923	FALSE	NoSigChange
A930005H10Rik	chr3	115881579	115888130	-	1405	TKO.DMSO.vs.J1.DMSO	-0.39833	2.00836	1.34498	0.246158	0.440858	FALSE	NoSigChange
A930007I19Rik	chr19	29503663	29521987	-	2317	TKO.DMSO.vs.J1.DMSO	-0.294654	0.179805	0.452094	0.501342	0.689691	FALSE	NoSigChange
A930011O12Rik	chr14	64588115	64593961	+	4039	TKO.DMSO.vs.J1.DMSO	0.626981	2.85752	6.05576	0.013861	0.0539622	FALSE	NoSigChange
A930013F10Rik	chr8	22634384	22636809	-	2426	TKO.DMSO.vs.J1.DMSO	-0.135826	2.34336	0.342313	0.558497	0.736247	FALSE	NoSigChange
A930015D03Rik	chr17	35994504	36038174	+	799	TKO.DMSO.vs.J1.DMSO	-0.164057	1.95016	0.379869	0.537673	0.7204	FALSE	NoSigChange
A930016O22Rik	chr7	19417466	19421417	-	2560	TKO.DMSO.vs.J1.DMSO	0.449433	0.390727	0.920254	0.337408	0.539192	FALSE	NoSigChange
A930017M01Rik	chr15	44881394	44884743	+	3350	TKO.DMSO.vs.J1.DMSO	-0.550494	0.116476	0.513137	0.473784	0.667834	FALSE	NoSigChange
A930024E05Rik	chr5	122989354	122998341	+	1892	TKO.DMSO.vs.J1.DMSO	-0.289992	2.87138	1.51021	0.219107	0.407334	FALSE	NoSigChange
AA388235	chr17	33981492	33985358	+	3867	TKO.DMSO.vs.J1.DMSO	0.131161	2.77005	0.319539	0.571885	0.746409	FALSE	NoSigChange
AA414768	chrX	12936873	12938541	+	1669	TKO.DMSO.vs.J1.DMSO	0.905768	1.19331	6.17475	0.0129586	0.0510629	FALSE	NoSigChange
AA415398	chr4	119530315	119538769	-	1902	TKO.DMSO.vs.J1.DMSO	-0.0220294	0.833132	0.00314965	0.955245	0.979351	FALSE	NoSigChange
AA465934	chr11	83291699	83294637	+	389	TKO.DMSO.vs.J1.DMSO	-0.533709	3.37963	6.41129	0.0113397	0.0459322	FALSE	NoSigChange
AA467197	chr2	122637887	122641076	+	640	TKO.DMSO.vs.J1.DMSO	1.26986	0.923124	6.31381	0.0119801	0.0479908	FALSE	NoSigChange
AA474331	chr10	39892760	39899238	-	781	TKO.DMSO.vs.J1.DMSO	-0.206807	2.22739	0.5908	0.44211	0.638076	FALSE	NoSigChange
AA543186	chr2	25327450	25332571	-	1696	TKO.DMSO.vs.J1.DMSO	0.212639	0.772192	0.292717	0.588485	0.758053	FALSE	NoSigChange
AA986860	chr1	130731976	130744622	+	2909	TKO.DMSO.vs.J1.DMSO	-1.6467	2.83828	23.9686	9.79189e-07	1.57894e-05	FALSE	NoSigChange
AA987161	chr13	67589439	67609707	-	4835	TKO.DMSO.vs.J1.DMSO	0.345038	6.98533	4.50187	0.0338578	0.107126	FALSE	NoSigChange
Aaas	chr15	102338247	102350759	-	1816	TKO.DMSO.vs.J1.DMSO	-0.31137	6.40127	7.92852	0.00486616	0.0234682	FALSE	NoSigChange
Aacs	chr5	125475873	125517403	+	3173	TKO.DMSO.vs.J1.DMSO	-0.101529	5.4801	0.512402	0.474101	0.668095	FALSE	NoSigChange
Aadat	chr8	60506124	60545677	+	1780	TKO.DMSO.vs.J1.DMSO	-0.205014	1.28573	0.221723	0.63773	0.792387	FALSE	NoSigChange
Aaed1	chr13	64291836	64312710	-	972	TKO.DMSO.vs.J1.DMSO	0.273166	3.76734	1.45008	0.228515	0.418636	FALSE	NoSigChange
Aagab	chr9	63602655	63641889	+	2600	TKO.DMSO.vs.J1.DMSO	0.0582965	6.60674	0.287468	0.591848	0.760069	FALSE	NoSigChange
Aak1	chr6	86849517	87003227	+	19345	TKO.DMSO.vs.J1.DMSO	0.2046	6.63165	3.33426	0.067851	0.179406	FALSE	NoSigChange
Aamdc	chr7	97550331	97579497	-	893	TKO.DMSO.vs.J1.DMSO	-0.143821	3.61285	0.332458	0.564216	0.741068	FALSE	NoSigChange
Aamp	chr1	74279840	74284738	-	1820	TKO.DMSO.vs.J1.DMSO	0.00688692	7.76359	0.00339991	0.953503	0.978311	FALSE	NoSigChange
Aar2	chr2	156547576	156568972	+	3590	TKO.DMSO.vs.J1.DMSO	0.0458134	6.18889	0.156744	0.692172	0.829471	FALSE	NoSigChange
Aard	chr15	52040107	52045722	+	1348	TKO.DMSO.vs.J1.DMSO	1.49438	5.34423	80.1772	3.42291e-19	4.78014e-17	TRUE	SigIncrease
Aars	chr8	111033967	111056870	+	4891	TKO.DMSO.vs.J1.DMSO	-0.671558	9.11643	24.1396	8.96008e-07	1.46656e-05	FALSE	NoSigChange
Aars2	chr17	45506841	45520843	+	3349	TKO.DMSO.vs.J1.DMSO	-0.0657162	5.42849	0.21925	0.639612	0.793624	FALSE	NoSigChange
Aarsd1	chr11	101406840	101417433	-	1333	TKO.DMSO.vs.J1.DMSO	0.254753	6.19376	4.80573	0.0283652	0.0939051	FALSE	NoSigChange
Aasdh	chr5	76875935	76905514	-	3694	TKO.DMSO.vs.J1.DMSO	-0.277796	4.67023	3.4575	0.0629654	0.169609	FALSE	NoSigChange
Aasdhppt	chr9	4294793	4309494	-	2870	TKO.DMSO.vs.J1.DMSO	-0.100111	7.20926	0.650013	0.420108	0.618546	FALSE	NoSigChange
Aass	chr6	23072173	23132986	-	3701	TKO.DMSO.vs.J1.DMSO	1.93001	5.13061	35.5275	2.51477e-09	7.5206e-08	TRUE	SigIncrease
Aatf	chr11	84422856	84513501	-	1800	TKO.DMSO.vs.J1.DMSO	-0.120768	6.88324	0.847498	0.357261	0.559488	FALSE	NoSigChange
Aatk	chr11	120007316	120047145	-	5740	TKO.DMSO.vs.J1.DMSO	0.0353	1.01548	0.00590593	0.938743	0.970164	FALSE	NoSigChange
Abat	chr16	8513429	8621567	+	4635	TKO.DMSO.vs.J1.DMSO	-0.405438	3.05482	2.75671	0.0968473	0.231455	FALSE	NoSigChange
Abca1	chr4	53030789	53159895	-	10260	TKO.DMSO.vs.J1.DMSO	-1.22505	5.29418	65.8204	4.93935e-16	4.32108e-14	TRUE	SigDecrease
Abca12	chr1	71243090	71414910	-	8323	TKO.DMSO.vs.J1.DMSO	-0.193547	0.519738	0.116434	0.732935	0.854461	FALSE	NoSigChange
Abca13	chr11	9191942	9684259	+	16011	TKO.DMSO.vs.J1.DMSO	1.1603	2.47158	6.2408	0.012484	0.0495001	FALSE	NoSigChange
Abca14	chr7	120203964	120325352	+	5384	TKO.DMSO.vs.J1.DMSO	0.858948	-0.528209	1.00716	0.315585	0.515875	FALSE	NoSigChange
Abca16	chr7	120421701	120544811	+	5084	TKO.DMSO.vs.J1.DMSO	2.42274	1.79987	19.1553	1.205e-05	0.000144657	FALSE	NoSigChange
Abca2	chr2	25428674	25448539	+	8061	TKO.DMSO.vs.J1.DMSO	0.382702	4.63292	5.73309	0.0166482	0.0619288	FALSE	NoSigChange
Abca3	chr17	24352046	24410201	+	6453	TKO.DMSO.vs.J1.DMSO	-0.38206	4.78487	5.64288	0.0175264	0.0643945	FALSE	NoSigChange
Abca4	chr3	122044460	122180061	+	7248	TKO.DMSO.vs.J1.DMSO	0.431611	2.03892	1.50393	0.220068	0.408584	FALSE	NoSigChange
Abca5	chr11	110269369	110337716	-	8269	TKO.DMSO.vs.J1.DMSO	0.0089371	5.01608	0.00203329	0.964034	0.983422	FALSE	NoSigChange
Abca7	chr10	79997615	80015572	+	6594	TKO.DMSO.vs.J1.DMSO	-0.463763	4.24523	4.46639	0.0345679	0.108967	FALSE	NoSigChange
Abca8a	chr11	110025634	110095937	-	5616	TKO.DMSO.vs.J1.DMSO	0.289059	-0.530629	0.0716149	0.789	0.886982	FALSE	NoSigChange
Abca8b	chr11	109933406	109995816	-	6178	TKO.DMSO.vs.J1.DMSO	-1.49288	1.78693	16.9058	3.92809e-05	0.000401471	FALSE	NoSigChange
Abcb10	chr8	123952459	123983122	-	4306	TKO.DMSO.vs.J1.DMSO	-0.0555125	6.41563	0.210567	0.646323	0.797878	FALSE	NoSigChange
Abcb11	chr2	69238282	69342616	-	4895	TKO.DMSO.vs.J1.DMSO	0.129133	-0.579364	0.0333413	0.855115	0.926578	FALSE	NoSigChange
Abcb1a	chr5	8660092	8748570	+	4977	TKO.DMSO.vs.J1.DMSO	0.407542	4.35216	4.64921	0.0310678	0.100792	FALSE	NoSigChange
Abcb1b	chr5	8798147	8866314	+	4344	TKO.DMSO.vs.J1.DMSO	-0.0619672	7.22045	0.173827	0.676732	0.819857	FALSE	NoSigChange
Abcb4	chr5	8893721	8959226	+	4075	TKO.DMSO.vs.J1.DMSO	1.51006	0.603084	7.27728	0.00698323	0.0312184	FALSE	NoSigChange
Abcb5	chr12	118867824	118966421	-	3876	TKO.DMSO.vs.J1.DMSO	-0.291853	3.47266	0.327099	0.567372	0.743696	FALSE	NoSigChange
Abcb6	chr1	75171641	75180283	-	2933	TKO.DMSO.vs.J1.DMSO	0.51715	5.48647	12.7444	0.000357086	0.00266972	FALSE	NoSigChange
Abcb7	chrX	104280565	104413846	-	5759	TKO.DMSO.vs.J1.DMSO	0.00430913	6.95187	0.00108901	0.973674	0.987847	FALSE	NoSigChange
Abcb8	chr5	24394156	24409947	+	2940	TKO.DMSO.vs.J1.DMSO	-0.171466	5.00154	0.971126	0.3244	0.525656	FALSE	NoSigChange
Abcb9	chr5	124061857	124095798	-	3334	TKO.DMSO.vs.J1.DMSO	-0.0251507	0.178123	0.00164345	0.967663	0.985335	FALSE	NoSigChange
Abcc1	chr16	14361558	14474878	+	5935	TKO.DMSO.vs.J1.DMSO	0.0143511	6.76522	0.0139981	0.905819	0.952989	FALSE	NoSigChange
Abcc10	chr17	46303230	46328023	-	5709	TKO.DMSO.vs.J1.DMSO	0.0595057	4.07684	0.107809	0.742653	0.860108	FALSE	NoSigChange
Abcc12	chr8	86504841	86566590	-	4511	TKO.DMSO.vs.J1.DMSO	-0.279412	-0.139222	0.263751	0.607555	0.771687	FALSE	NoSigChange
Abcc2	chr19	43782308	43838218	+	5389	TKO.DMSO.vs.J1.DMSO	1.56459	2.26399	26.3587	2.83535e-07	5.23783e-06	TRUE	SigIncrease
Abcc3	chr11	94343295	94392976	-	5002	TKO.DMSO.vs.J1.DMSO	0.25216	2.06848	0.572027	0.449455	0.645023	FALSE	NoSigChange
Abcc4	chr14	118482692	118706219	-	5895	TKO.DMSO.vs.J1.DMSO	0.159723	6.61186	1.41255	0.234633	0.425949	FALSE	NoSigChange
Abcc5	chr16	20331304	20426394	-	6196	TKO.DMSO.vs.J1.DMSO	0.52997	7.48484	17.0856	3.57316e-05	0.000368501	FALSE	NoSigChange
Abcc6	chr7	45976380	46030286	-	4958	TKO.DMSO.vs.J1.DMSO	0.937523	0.757655	3.39143	0.0655361	0.174704	FALSE	NoSigChange
Abcc8	chr7	46104523	46180033	-	4952	TKO.DMSO.vs.J1.DMSO	-1.63449	2.53833	17.4028	3.02383e-05	0.000320089	FALSE	NoSigChange
Abcc9	chr6	142587862	142702274	-	7538	TKO.DMSO.vs.J1.DMSO	0.204459	0.183915	0.0455319	0.831029	0.91373	FALSE	NoSigChange
Abcd1	chrX	73716597	73738287	+	3401	TKO.DMSO.vs.J1.DMSO	0.192327	2.97775	0.683983	0.408219	0.607242	FALSE	NoSigChange
Abcd2	chr15	91145871	91191807	-	5540	TKO.DMSO.vs.J1.DMSO	-1.20796	1.92795	5.25742	0.0218534	0.0768962	FALSE	NoSigChange
Abcd3	chr3	121758910	121815215	-	3399	TKO.DMSO.vs.J1.DMSO	0.167726	5.94428	2.11918	0.145464	0.306409	FALSE	NoSigChange
Abcd4	chr12	84602531	84617466	-	2527	TKO.DMSO.vs.J1.DMSO	0.803425	5.08913	37.5075	9.1061e-10	2.98735e-08	TRUE	SigIncrease
Abce1	chr8	79683442	79711740	-	3813	TKO.DMSO.vs.J1.DMSO	0.0156238	9.74617	0.0220471	0.881962	0.941196	FALSE	NoSigChange
Abcf1	chr17	35956819	35969750	-	3150	TKO.DMSO.vs.J1.DMSO	-0.165957	7.43822	1.95173	0.162401	0.331499	FALSE	NoSigChange
Abcf2	chr5	24565341	24577467	-	2573	TKO.DMSO.vs.J1.DMSO	-0.0711494	8.51135	0.506193	0.476792	0.670063	FALSE	NoSigChange
Abcf3	chr16	20548603	20561603	+	3288	TKO.DMSO.vs.J1.DMSO	0.0640366	6.11449	0.306975	0.579543	0.751559	FALSE	NoSigChange
Abcg1	chr17	31057694	31117981	+	5818	TKO.DMSO.vs.J1.DMSO	0.923218	5.12156	47.8944	4.49802e-12	2.24488e-10	TRUE	SigIncrease
Abcg2	chr6	58596672	58692451	+	2491	TKO.DMSO.vs.J1.DMSO	-0.123413	7.19513	0.763898	0.382111	0.581766	FALSE	NoSigChange
Abcg3	chr5	104935057	104982717	-	3034	TKO.DMSO.vs.J1.DMSO	0.798459	0.693334	2.26029	0.132729	0.28819	FALSE	NoSigChange
Abhd1	chr5	30950066	30955095	+	1356	TKO.DMSO.vs.J1.DMSO	-0.00977349	3.18886	0.00219874	0.9626	0.982828	FALSE	NoSigChange
Abhd10	chr16	45729725	45742955	-	2890	TKO.DMSO.vs.J1.DMSO	0.229518	5.12211	2.5027	0.113652	0.258325	FALSE	NoSigChange
Abhd11	chr5	135009152	135012175	+	1699	TKO.DMSO.vs.J1.DMSO	-0.0116374	5.05285	0.00619121	0.937284	0.969429	FALSE	NoSigChange
Abhd12	chr2	150832515	150904731	-	1967	TKO.DMSO.vs.J1.DMSO	0.351579	5.65755	7.96444	0.00477052	0.023053	FALSE	NoSigChange
Abhd13	chr8	9977717	9992154	+	5180	TKO.DMSO.vs.J1.DMSO	-0.487024	6.94027	18.3235	1.86395e-05	0.000213011	FALSE	NoSigChange
Abhd14a	chr9	106440051	106447678	-	1434	TKO.DMSO.vs.J1.DMSO	-0.207795	4.58558	1.86361	0.172209	0.345007	FALSE	NoSigChange
Abhd14b	chr9	106448640	106452918	+	1475	TKO.DMSO.vs.J1.DMSO	0.54429	2.36799	4.45085	0.034884	0.109626	FALSE	NoSigChange
Abhd15	chr11	77515117	77520628	+	3249	TKO.DMSO.vs.J1.DMSO	2.13687	1.71352	29.8604	4.64304e-08	1.01839e-06	TRUE	SigIncrease
Abhd16a	chr17	35089291	35102987	+	1945	TKO.DMSO.vs.J1.DMSO	-0.14799	3.84685	0.436607	0.508765	0.696247	FALSE	NoSigChange
Abhd2	chr7	79273266	79361601	+	2903	TKO.DMSO.vs.J1.DMSO	-0.0415198	6.02045	0.0723369	0.787964	0.886438	FALSE	NoSigChange
Abhd3	chr18	10644411	10706696	-	1887	TKO.DMSO.vs.J1.DMSO	0.49755	3.07562	1.49703	0.221128	0.410039	FALSE	NoSigChange
Abhd4	chr14	54254129	54269169	+	2749	TKO.DMSO.vs.J1.DMSO	-0.409424	5.76565	9.84464	0.00170327	0.00993761	FALSE	NoSigChange
Abhd5	chr9	122351616	122381523	+	3148	TKO.DMSO.vs.J1.DMSO	-0.354797	5.38459	4.06113	0.0438811	0.130614	FALSE	NoSigChange
Abhd6	chr14	8002902	8056555	+	2018	TKO.DMSO.vs.J1.DMSO	-0.320691	3.23649	2.14476	0.143057	0.302994	FALSE	NoSigChange
Abhd8	chr8	71456700	71463657	-	1985	TKO.DMSO.vs.J1.DMSO	-0.390457	4.63547	5.21425	0.0224025	0.0784112	FALSE	NoSigChange
Abi1	chr2	22939989	23040240	-	3504	TKO.DMSO.vs.J1.DMSO	0.30358	7.13332	6.08428	0.013639	0.0532068	FALSE	NoSigChange
Abi2	chr1	60409619	60481163	+	5974	TKO.DMSO.vs.J1.DMSO	0.0715241	7.52947	0.391961	0.53127	0.714588	FALSE	NoSigChange
Abi3	chr11	95830072	95842476	-	4075	TKO.DMSO.vs.J1.DMSO	0.283926	1.49848	0.776573	0.378191	0.578015	FALSE	NoSigChange
Abi3bp	chr16	56477846	56690135	+	4742	TKO.DMSO.vs.J1.DMSO	-0.672741	0.625136	1.01719	0.313186	0.513229	FALSE	NoSigChange
Abl1	chr2	31688556	31804227	+	7179	TKO.DMSO.vs.J1.DMSO	-0.018929	6.48048	0.0313799	0.859395	0.928374	FALSE	NoSigChange
Abl2	chr1	156558787	156649619	+	10714	TKO.DMSO.vs.J1.DMSO	0.0638115	7.24554	0.367382	0.544435	0.725818	FALSE	NoSigChange
Ablim1	chr19	57033264	57216032	-	7073	TKO.DMSO.vs.J1.DMSO	-0.0373314	4.05628	0.0414569	0.838659	0.917036	FALSE	NoSigChange
Ablim2	chr5	35757880	35884979	+	3761	TKO.DMSO.vs.J1.DMSO	0.887181	1.21695	3.48173	0.0620497	0.167678	FALSE	NoSigChange
Ablim3	chr18	61799393	61911852	-	4562	TKO.DMSO.vs.J1.DMSO	-0.462617	1.55057	1.05989	0.303239	0.503426	FALSE	NoSigChange
Abo	chr2	26842503	26864979	-	1779	TKO.DMSO.vs.J1.DMSO	2.90229	0.987475	35.2006	2.97436e-09	8.7574e-08	TRUE	SigIncrease
Abr	chr11	76416734	76577727	-	5801	TKO.DMSO.vs.J1.DMSO	0.121921	6.551	1.03494	0.309002	0.509051	FALSE	NoSigChange
Abracl	chr10	18011260	18023252	-	810	TKO.DMSO.vs.J1.DMSO	0.204626	5.50028	1.48395	0.223157	0.412245	FALSE	NoSigChange
Abt1	chr13	23418361	23423866	-	4456	TKO.DMSO.vs.J1.DMSO	0.161009	6.2484	2.10355	0.146958	0.308911	FALSE	NoSigChange
Abtb1	chr6	88835914	88841935	-	1880	TKO.DMSO.vs.J1.DMSO	-0.0231832	5.11424	0.0327617	0.856366	0.927141	FALSE	NoSigChange
Abtb2	chr2	103566310	103718423	+	4558	TKO.DMSO.vs.J1.DMSO	0.151052	4.61985	0.579892	0.446355	0.641769	FALSE	NoSigChange
Acaa1a	chr9	119341294	119350295	+	1758	TKO.DMSO.vs.J1.DMSO	0.00225927	5.43673	0.000347566	0.985126	0.9935	FALSE	NoSigChange
Acaa1b	chr9	119148043	119157093	-	1669	TKO.DMSO.vs.J1.DMSO	0.937848	2.14688	6.7835	0.00920044	0.0388163	FALSE	NoSigChange
Acaa2	chr18	74779212	74806207	+	1500	TKO.DMSO.vs.J1.DMSO	1.26333	6.07368	116.621	3.4743e-27	8.013e-25	TRUE	SigIncrease
Acaca	chr11	84195438	84401651	+	9032	TKO.DMSO.vs.J1.DMSO	-0.245475	6.66446	4.71153	0.029961	0.0979665	FALSE	NoSigChange
Acacb	chr5	114165518	114250758	+	8485	TKO.DMSO.vs.J1.DMSO	-0.279652	4.75877	3.89465	0.0484402	0.139889	FALSE	NoSigChange
Acad10	chr5	121621029	121660510	-	3621	TKO.DMSO.vs.J1.DMSO	0.354608	3.46326	3.06255	0.0801158	0.201965	FALSE	NoSigChange
Acad11	chr9	104063703	104127646	+	3348	TKO.DMSO.vs.J1.DMSO	-0.139786	5.985	0.801566	0.370625	0.5712	FALSE	NoSigChange
Acad12	chr5	121598281	121618938	-	2375	TKO.DMSO.vs.J1.DMSO	0.248717	2.29697	0.878344	0.348656	0.550702	FALSE	NoSigChange
Acad8	chr9	26974139	26999549	-	2864	TKO.DMSO.vs.J1.DMSO	-0.135448	5.61873	1.24232	0.265024	0.462903	FALSE	NoSigChange
Acad9	chr3	36066000	36092857	+	3913	TKO.DMSO.vs.J1.DMSO	0.213692	6.8553	3.82324	0.0505464	0.144275	FALSE	NoSigChange
Acadl	chr1	66830839	66863309	-	1948	TKO.DMSO.vs.J1.DMSO	-0.160267	3.59988	0.699826	0.402842	0.601595	FALSE	NoSigChange
Acadm	chr3	153922353	153944643	-	2062	TKO.DMSO.vs.J1.DMSO	0.288372	6.87141	6.80077	0.00911188	0.0385067	FALSE	NoSigChange
Acads	chr5	115110299	115119346	-	1870	TKO.DMSO.vs.J1.DMSO	0.204272	5.85045	2.24798	0.133789	0.289775	FALSE	NoSigChange
Acadsb	chr7	131410601	131446211	+	3348	TKO.DMSO.vs.J1.DMSO	0.398765	6.20636	9.19966	0.0024206	0.013355	FALSE	NoSigChange
Acadvl	chr11	70010183	70015428	-	2188	TKO.DMSO.vs.J1.DMSO	0.78839	6.53485	28.4354	9.6878e-08	1.96624e-06	TRUE	SigIncrease
Acan	chr7	79053483	79115099	+	7355	TKO.DMSO.vs.J1.DMSO	0.251237	5.26382	1.22573	0.268239	0.466497	FALSE	NoSigChange
Acap1	chr11	69881567	69895539	-	2482	TKO.DMSO.vs.J1.DMSO	-0.0947975	4.007	0.146746	0.701665	0.834824	FALSE	NoSigChange
Acap2	chr16	31092413	31201238	-	6493	TKO.DMSO.vs.J1.DMSO	0.0678116	6.95875	0.361232	0.547823	0.728039	FALSE	NoSigChange
Acap3	chr4	155891875	155907251	+	4312	TKO.DMSO.vs.J1.DMSO	0.126985	4.45971	0.699687	0.402889	0.601607	FALSE	NoSigChange
Acat1	chr9	53580522	53610350	-	3373	TKO.DMSO.vs.J1.DMSO	0.342886	5.63863	6.24018	0.0124884	0.0495046	FALSE	NoSigChange
Acat2	chr17	12943042	12960725	-	2076	TKO.DMSO.vs.J1.DMSO	-0.0331197	6.12861	0.08012	0.777135	0.879259	FALSE	NoSigChange
Acat3	chr17	12923959	12940396	-	1991	TKO.DMSO.vs.J1.DMSO	-0.478568	1.72058	2.87676	0.0898665	0.219715	FALSE	NoSigChange
Acbd3	chr1	180726043	180754204	+	3471	TKO.DMSO.vs.J1.DMSO	0.0837813	5.97489	0.534209	0.464843	0.65926	FALSE	NoSigChange
Acbd4	chr11	103101688	103112199	+	2076	TKO.DMSO.vs.J1.DMSO	-0.305261	4.60098	3.02974	0.0817509	0.204774	FALSE	NoSigChange
Acbd5	chr2	23068201	23114512	+	3809	TKO.DMSO.vs.J1.DMSO	0.0514883	5.9711	0.138881	0.709396	0.838766	FALSE	NoSigChange
Acbd6	chr1	155558120	155687233	+	1942	TKO.DMSO.vs.J1.DMSO	-0.233868	5.14452	3.04848	0.0808129	0.203127	FALSE	NoSigChange
Acbd7	chr2	3336168	3340997	+	535	TKO.DMSO.vs.J1.DMSO	0.704118	2.73063	5.37935	0.0203765	0.0725208	FALSE	NoSigChange
Accs	chr2	93835453	93849776	-	1998	TKO.DMSO.vs.J1.DMSO	0.0893581	2.41746	0.137665	0.710613	0.839499	FALSE	NoSigChange
Accsl	chr2	93855360	93869157	-	2225	TKO.DMSO.vs.J1.DMSO	-0.425289	3.73808	4.56955	0.0325452	0.104032	FALSE	NoSigChange
Acd	chr8	105698159	105701095	-	1425	TKO.DMSO.vs.J1.DMSO	-0.549366	3.85869	8.92894	0.00280687	0.0150604	FALSE	NoSigChange
Ace	chr11	105967945	105989964	+	5102	TKO.DMSO.vs.J1.DMSO	2.61361	2.54666	32.7098	1.06995e-08	2.70995e-07	TRUE	SigIncrease
Acer1	chr17	56953490	56982126	-	2429	TKO.DMSO.vs.J1.DMSO	0.299517	1.92538	0.677619	0.410408	0.609321	FALSE	NoSigChange
Acer2	chr4	86874414	86920881	+	4204	TKO.DMSO.vs.J1.DMSO	0.16115	5.45967	0.392529	0.530973	0.714252	FALSE	NoSigChange
Acer3	chr7	98213660	98309527	-	4058	TKO.DMSO.vs.J1.DMSO	-0.102039	5.60383	0.344258	0.557382	0.735641	FALSE	NoSigChange
Acin1	chr14	54642161	54686931	-	4967	TKO.DMSO.vs.J1.DMSO	-0.201959	6.90784	3.09333	0.0786137	0.199476	FALSE	NoSigChange
Acly	chr11	100476352	100528000	-	4427	TKO.DMSO.vs.J1.DMSO	-0.0959193	9.49884	0.828761	0.362631	0.564414	FALSE	NoSigChange
Acn9	chr6	6956018	7039220	+	550	TKO.DMSO.vs.J1.DMSO	0.0815326	3.62207	0.159415	0.689696	0.827766	FALSE	NoSigChange
Acnat1	chr4	49443532	49451109	-	5048	TKO.DMSO.vs.J1.DMSO	-0.796637	-0.136208	2.59648	0.107102	0.247804	FALSE	NoSigChange
Aco1	chr4	40143265	40199009	+	4319	TKO.DMSO.vs.J1.DMSO	-0.159745	6.98163	1.79174	0.180714	0.357018	FALSE	NoSigChange
Aco2	chr15	81872463	81915137	+	2768	TKO.DMSO.vs.J1.DMSO	0.00314495	8.19374	0.000954285	0.975356	0.989	FALSE	NoSigChange
Acot1	chr12	84009502	84017669	+	1558	TKO.DMSO.vs.J1.DMSO	0.367178	4.45861	4.13526	0.0419986	0.126444	FALSE	NoSigChange
Acot10	chr15	20665214	20666750	-	1537	TKO.DMSO.vs.J1.DMSO	-0.054521	4.55709	0.150447	0.698108	0.832871	FALSE	NoSigChange
Acot11	chr4	106744561	106799831	-	5668	TKO.DMSO.vs.J1.DMSO	0.449235	3.75628	2.71154	0.0996245	0.236065	FALSE	NoSigChange
Acot12	chr13	91741521	91786148	+	3049	TKO.DMSO.vs.J1.DMSO	-0.0902788	-0.80253	0.00478537	0.944849	0.973583	FALSE	NoSigChange
Acot13	chr13	24817955	24831489	-	686	TKO.DMSO.vs.J1.DMSO	-0.217003	4.16342	1.55347	0.212624	0.398689	FALSE	NoSigChange
Acot2	chr12	83987861	83993875	+	2198	TKO.DMSO.vs.J1.DMSO	-0.514516	2.98724	6.27614	0.0122375	0.0487258	FALSE	NoSigChange
Acot3	chr12	84052151	84059564	+	2593	TKO.DMSO.vs.J1.DMSO	0.891052	-0.00751764	2.75152	0.0971617	0.232036	FALSE	NoSigChange
Acot4	chr12	84038379	84044723	+	2325	TKO.DMSO.vs.J1.DMSO	0.352835	-0.0724394	0.469447	0.493242	0.683427	FALSE	NoSigChange
Acot7	chr4	152178100	152271855	+	1860	TKO.DMSO.vs.J1.DMSO	0.0861335	5.67651	0.431804	0.511105	0.698137	FALSE	NoSigChange
Acot8	chr2	164792768	164804881	-	1151	TKO.DMSO.vs.J1.DMSO	0.264967	4.76404	3.27216	0.0704647	0.184045	FALSE	NoSigChange
Acot9	chrX	155262500	155297507	+	1548	TKO.DMSO.vs.J1.DMSO	-0.0667998	5.65759	0.255183	0.613449	0.776348	FALSE	NoSigChange
Acox1	chr11	116171883	116199045	-	4153	TKO.DMSO.vs.J1.DMSO	0.00539413	5.67884	0.00134797	0.970712	0.986363	FALSE	NoSigChange
Acox3	chr5	35583060	35613801	+	3956	TKO.DMSO.vs.J1.DMSO	0.0425991	3.48006	0.032532	0.856865	0.927178	FALSE	NoSigChange
Acoxl	chr2	127854628	128123892	+	2861	TKO.DMSO.vs.J1.DMSO	1.46319	0.874984	8.90393	0.00284558	0.0152304	FALSE	NoSigChange
Acp1	chr12	30893326	30911612	-	3221	TKO.DMSO.vs.J1.DMSO	0.0682766	4.05287	0.149954	0.69858	0.832977	FALSE	NoSigChange
Acp2	chr2	91202912	91214098	+	4653	TKO.DMSO.vs.J1.DMSO	-0.327467	4.39179	3.76037	0.0524809	0.148654	FALSE	NoSigChange
Acp5	chr9	22126727	22135746	-	1616	TKO.DMSO.vs.J1.DMSO	0.136192	2.58746	0.220261	0.638841	0.793184	FALSE	NoSigChange
Acp6	chr3	97158777	97176576	+	1756	TKO.DMSO.vs.J1.DMSO	0.133217	5.87502	1.1755	0.278273	0.478195	FALSE	NoSigChange
Acpl2	chr9	96823343	96889422	-	3120	TKO.DMSO.vs.J1.DMSO	0.269421	3.03709	0.854913	0.355166	0.557527	FALSE	NoSigChange
Acpp	chr9	104288240	104337722	-	5957	TKO.DMSO.vs.J1.DMSO	0.961352	3.45852	13.6848	0.000216192	0.00174028	FALSE	NoSigChange
Acrbp	chr6	125049927	125063265	+	2154	TKO.DMSO.vs.J1.DMSO	-0.0984783	3.24676	0.204582	0.651048	0.801329	FALSE	NoSigChange
Acsbg1	chr9	54604997	54661885	-	2775	TKO.DMSO.vs.J1.DMSO	0.508308	1.49346	1.19887	0.273547	0.472477	FALSE	NoSigChange
Acsbg2	chr17	56843104	56874447	-	2608	TKO.DMSO.vs.J1.DMSO	0.998515	0.0945251	6.44192	0.0111458	0.0452723	FALSE	NoSigChange
Acsf2	chr11	94557102	94601786	-	3069	TKO.DMSO.vs.J1.DMSO	0.833865	1.82687	4.25748	0.0390778	0.119446	FALSE	NoSigChange
Acsf3	chr8	122775505	122817881	+	2207	TKO.DMSO.vs.J1.DMSO	-0.45302	4.74153	9.86464	0.00168485	0.00984902	FALSE	NoSigChange
Acsl1	chr8	46471042	46536050	+	3891	TKO.DMSO.vs.J1.DMSO	0.504101	6.38126	13.8969	0.000193116	0.00157959	FALSE	NoSigChange
Acsl3	chr1	78657825	78707743	+	3950	TKO.DMSO.vs.J1.DMSO	-0.287894	7.91232	6.93458	0.0084545	0.0363646	FALSE	NoSigChange
Acsl4	chrX	142317993	142390535	-	5280	TKO.DMSO.vs.J1.DMSO	-0.496343	6.59247	12.5503	0.000396136	0.00292009	FALSE	NoSigChange
Acsl5	chr19	55253369	55296628	+	3151	TKO.DMSO.vs.J1.DMSO	-0.320307	5.7335	5.37987	0.0203704	0.0725159	FALSE	NoSigChange
Acsl6	chr11	54303824	54361539	+	3074	TKO.DMSO.vs.J1.DMSO	0.142786	3.44159	0.372657	0.54156	0.723421	FALSE	NoSigChange
Acsm3	chr7	119760923	119784896	+	2859	TKO.DMSO.vs.J1.DMSO	1.29511	-0.394718	0.872988	0.350129	0.55224	FALSE	NoSigChange
Acss1	chr2	150618111	150668240	-	3594	TKO.DMSO.vs.J1.DMSO	1.20566	4.6575	40.9218	1.58443e-10	5.89685e-09	TRUE	SigIncrease
Acss2	chr2	155518043	155562743	+	2833	TKO.DMSO.vs.J1.DMSO	0.31075	4.66654	2.77749	0.0955977	0.229416	FALSE	NoSigChange
Acss3	chr10	106936164	107123664	-	3104	TKO.DMSO.vs.J1.DMSO	1.28234	1.5597	6.80636	0.00908337	0.0384182	FALSE	NoSigChange
Acta1	chr8	123891758	123894775	-	1571	TKO.DMSO.vs.J1.DMSO	-3.96266	3.19883	69.4423	7.86838e-17	7.72725e-15	TRUE	SigDecrease
Acta2	chr19	34240336	34255373	-	2572	TKO.DMSO.vs.J1.DMSO	-3.65327	4.25685	90.3058	2.04058e-21	3.41338e-19	TRUE	SigDecrease
Actb	chr5	142903116	142906724	-	1889	TKO.DMSO.vs.J1.DMSO	-0.190571	10.9888	2.32975	0.126922	0.27984	FALSE	NoSigChange
Actc1	chr2	114047289	114052811	-	1390	TKO.DMSO.vs.J1.DMSO	-0.484896	-0.653478	0.274824	0.600114	0.765853	FALSE	NoSigChange
Actg1	chr11	120345690	120348484	-	1894	TKO.DMSO.vs.J1.DMSO	-0.229266	5.96764	1.44834	0.228794	0.418997	FALSE	NoSigChange
Actl6a	chr3	32708546	32726971	+	1969	TKO.DMSO.vs.J1.DMSO	0.0450025	8.06586	0.150485	0.698072	0.832871	FALSE	NoSigChange
Actl7b	chr4	56740005	56741425	-	1421	TKO.DMSO.vs.J1.DMSO	-0.607888	0.0306197	1.66138	0.197417	0.378812	FALSE	NoSigChange
Actn1	chr12	80167542	80260371	-	3739	TKO.DMSO.vs.J1.DMSO	-0.3844	7.24921	10.5899	0.00113707	0.00707625	FALSE	NoSigChange
Actn2	chr13	12269427	12340732	-	2984	TKO.DMSO.vs.J1.DMSO	0.133265	3.90955	0.362347	0.547205	0.727555	FALSE	NoSigChange
Actn3	chr19	4861216	4877909	-	2887	TKO.DMSO.vs.J1.DMSO	-0.396287	5.05132	3.79518	0.0514003	0.146137	FALSE	NoSigChange
Actn4	chr7	28893254	28962280	-	3811	TKO.DMSO.vs.J1.DMSO	-0.0727619	7.24547	0.364528	0.546002	0.726698	FALSE	NoSigChange
Actr10	chr12	70937857	70964717	+	4021	TKO.DMSO.vs.J1.DMSO	-0.0160605	6.85133	0.0207834	0.885371	0.94297	FALSE	NoSigChange
Actr1a	chr19	46376814	46395735	-	2742	TKO.DMSO.vs.J1.DMSO	-0.312388	7.3858	4.46227	0.0346514	0.109161	FALSE	NoSigChange
Actr1b	chr1	36699202	36709925	-	2077	TKO.DMSO.vs.J1.DMSO	-0.313036	6.83345	5.55954	0.0183802	0.0668525	FALSE	NoSigChange
Actr2	chr11	20062304	20112951	-	3669	TKO.DMSO.vs.J1.DMSO	0.0871731	7.95994	0.430317	0.511833	0.698944	FALSE	NoSigChange
Actr3	chr1	125392905	125435727	-	2746	TKO.DMSO.vs.J1.DMSO	-0.26465	7.75431	6.06442	0.0137932	0.0537531	FALSE	NoSigChange
Actr3b	chr5	25760026	25850341	+	1711	TKO.DMSO.vs.J1.DMSO	0.854127	4.82746	29.0753	6.96195e-08	1.4557e-06	TRUE	SigIncrease
Actr5	chr2	158624913	158639211	+	2377	TKO.DMSO.vs.J1.DMSO	-0.390483	4.26419	6.57766	0.0103267	0.0425305	FALSE	NoSigChange
Actr6	chr10	89711973	89732295	-	1703	TKO.DMSO.vs.J1.DMSO	0.0220811	5.46982	0.019506	0.888926	0.944984	FALSE	NoSigChange
Actr8	chr14	29978337	29993221	+	2121	TKO.DMSO.vs.J1.DMSO	-0.109421	6.21227	0.941976	0.33177	0.533071	FALSE	NoSigChange
Acvr1	chr2	58446438	58566828	-	3298	TKO.DMSO.vs.J1.DMSO	0.172097	2.84617	0.565535	0.452039	0.647556	FALSE	NoSigChange
Acvr1b	chr15	101174125	101212601	+	3277	TKO.DMSO.vs.J1.DMSO	0.00850525	4.9337	0.00325498	0.954503	0.979074	FALSE	NoSigChange
Acvr1c	chr2	58267453	58357758	-	9049	TKO.DMSO.vs.J1.DMSO	3.73217	0.116938	3.77819	0.0519249	0.147358	FALSE	NoSigChange
Acvr2a	chr2	48814109	48903264	+	5681	TKO.DMSO.vs.J1.DMSO	0.207079	5.79383	2.23468	0.134944	0.291406	FALSE	NoSigChange
Acvr2b	chr9	119402501	119433506	+	1701	TKO.DMSO.vs.J1.DMSO	-0.194539	4.0836	1.12547	0.288745	0.489287	FALSE	NoSigChange
Acvrl1	chr15	101128537	101145336	+	3625	TKO.DMSO.vs.J1.DMSO	-0.874536	0.534562	3.69402	0.0546077	0.153111	FALSE	NoSigChange
Acy1	chr9	106432981	106438236	-	1446	TKO.DMSO.vs.J1.DMSO	-0.193557	5.27329	2.03842	0.153369	0.318583	FALSE	NoSigChange
Acy3	chr19	3986661	3990005	+	1503	TKO.DMSO.vs.J1.DMSO	0.445159	2.67475	1.66433	0.19702	0.378327	FALSE	NoSigChange
Acyp1	chr12	85272398	85280435	-	648	TKO.DMSO.vs.J1.DMSO	-0.225615	3.15595	0.844461	0.358124	0.560206	FALSE	NoSigChange
Acyp2	chr11	30505992	30649396	-	671	TKO.DMSO.vs.J1.DMSO	0.141057	1.83798	0.363074	0.546804	0.727256	FALSE	NoSigChange
Ada	chr2	163726571	163750239	-	1704	TKO.DMSO.vs.J1.DMSO	0.420412	5.11684	7.24414	0.00711329	0.0316882	FALSE	NoSigChange
Adad1	chr3	37063656	37111512	+	1972	TKO.DMSO.vs.J1.DMSO	-0.148965	0.751747	0.120548	0.728441	0.851638	FALSE	NoSigChange
Adad2	chr8	119612747	119616926	+	1928	TKO.DMSO.vs.J1.DMSO	-2.16891	2.55499	47.2944	6.10877e-12	2.9996e-10	TRUE	SigDecrease
Adal	chr2	121142141	121156678	+	2317	TKO.DMSO.vs.J1.DMSO	0.0272691	4.77892	0.0254885	0.873156	0.936215	FALSE	NoSigChange
Adam10	chr9	70679001	70780229	+	4589	TKO.DMSO.vs.J1.DMSO	0.753742	4.66725	16.5388	4.76638e-05	0.000473898	FALSE	NoSigChange
Adam11	chr11	102761439	102780262	+	5102	TKO.DMSO.vs.J1.DMSO	-0.872	1.90946	8.81601	0.00298598	0.0157986	FALSE	NoSigChange
Adam12	chr7	133883199	134225097	-	7675	TKO.DMSO.vs.J1.DMSO	-1.8809	0.169134	14.6256	0.000131123	0.00112893	FALSE	NoSigChange
Adam15	chr3	89339640	89350010	-	2989	TKO.DMSO.vs.J1.DMSO	-0.0330044	5.13284	0.0429768	0.835769	0.915652	FALSE	NoSigChange
Adam17	chr12	21323509	21373591	-	4410	TKO.DMSO.vs.J1.DMSO	0.153709	6.93893	2.24811	0.133777	0.289775	FALSE	NoSigChange
Adam19	chr11	46055987	46147342	+	6387	TKO.DMSO.vs.J1.DMSO	0.0403099	6.73834	0.0928449	0.760591	0.870571	FALSE	NoSigChange
Adam1a	chr5	121518604	121521695	-	3092	TKO.DMSO.vs.J1.DMSO	-0.286203	1.8493	0.810392	0.368004	0.569285	FALSE	NoSigChange
Adam21	chr12	81558584	81568474	-	2911	TKO.DMSO.vs.J1.DMSO	0.600123	0.0175384	1.67537	0.195541	0.376375	FALSE	NoSigChange
Adam22	chr5	8072352	8368081	-	9256	TKO.DMSO.vs.J1.DMSO	0.171384	5.42513	1.76567	0.183919	0.361941	FALSE	NoSigChange
Adam23	chr1	63445904	63596515	+	6877	TKO.DMSO.vs.J1.DMSO	-0.0985916	6.85883	0.482046	0.487497	0.67942	FALSE	NoSigChange
Adam25	chr8	40752208	40756176	+	2621	TKO.DMSO.vs.J1.DMSO	1.44567	0.0370704	4.04285	0.0443589	0.131573	FALSE	NoSigChange
Adam33	chr2	131050817	131063814	-	3165	TKO.DMSO.vs.J1.DMSO	-0.42521	0.122298	0.750987	0.386164	0.585127	FALSE	NoSigChange
Adam4	chr12	81419549	81421878	-	2330	TKO.DMSO.vs.J1.DMSO	0.246859	1.36761	0.64357	0.422421	0.620665	FALSE	NoSigChange
Adam8	chr7	139978941	139992488	-	3034	TKO.DMSO.vs.J1.DMSO	-1.10468	4.0111	17.1209	3.50747e-05	0.000363449	FALSE	NoSigChange
Adam9	chr8	24949611	25016922	-	4039	TKO.DMSO.vs.J1.DMSO	-0.203831	6.52257	2.73406	0.0982293	0.233888	FALSE	NoSigChange
Adamts1	chr16	85793828	85803115	-	4885	TKO.DMSO.vs.J1.DMSO	-2.53909	4.45531	41.9178	9.51904e-11	3.71535e-09	TRUE	SigDecrease
Adamts10	chr17	33524196	33553782	+	4070	TKO.DMSO.vs.J1.DMSO	-0.0437599	3.16391	0.0348848	0.851837	0.924737	FALSE	NoSigChange
Adamts12	chr15	11064790	11346867	+	6234	TKO.DMSO.vs.J1.DMSO	-3.16997	-0.406398	18.1863	2.00317e-05	0.000226159	FALSE	NoSigChange
Adamts14	chr10	61197112	61273438	-	5188	TKO.DMSO.vs.J1.DMSO	0.461899	3.57063	3.92829	0.0474801	0.137928	FALSE	NoSigChange
Adamts15	chr9	30899155	30922452	-	5928	TKO.DMSO.vs.J1.DMSO	-0.780709	4.26035	9.10514	0.00254893	0.0139017	FALSE	NoSigChange
Adamts17	chr7	66839735	67152625	+	6029	TKO.DMSO.vs.J1.DMSO	-0.850984	1.75914	4.27007	0.0387893	0.118869	FALSE	NoSigChange
Adamts18	chr8	113698137	113848839	-	4855	TKO.DMSO.vs.J1.DMSO	-0.481474	-0.529414	0.194501	0.659197	0.807524	FALSE	NoSigChange
Adamts19	chr18	58836764	59053678	+	4666	TKO.DMSO.vs.J1.DMSO	0.488271	2.5615	4.7167	0.0298711	0.0977844	FALSE	NoSigChange
Adamts2	chr11	50602085	50804049	+	3741	TKO.DMSO.vs.J1.DMSO	0.408487	1.60982	1.4814	0.223556	0.412731	FALSE	NoSigChange
Adamts20	chr15	94270163	94404350	-	8772	TKO.DMSO.vs.J1.DMSO	-0.312595	1.76437	0.757498	0.384113	0.583704	FALSE	NoSigChange
Adamts3	chr5	89673841	89883334	-	7663	TKO.DMSO.vs.J1.DMSO	-0.0844271	1.9357	0.060503	0.805703	0.897768	FALSE	NoSigChange
Adamts4	chr1	171250422	171259922	+	3673	TKO.DMSO.vs.J1.DMSO	-0.626964	2.07675	5.57979	0.0181689	0.0663072	FALSE	NoSigChange
Adamts5	chr16	85858157	85901125	-	8104	TKO.DMSO.vs.J1.DMSO	-2.42533	2.11324	54.7232	1.38761e-13	8.76439e-12	TRUE	SigDecrease
Adamts6	chr13	104287873	104494763	+	4822	TKO.DMSO.vs.J1.DMSO	-2.50852	2.54158	43.8368	3.56936e-11	1.52447e-09	TRUE	SigDecrease
Adamts7	chr9	90162978	90200102	+	5346	TKO.DMSO.vs.J1.DMSO	-1.08431	3.90407	17.5819	2.75202e-05	0.000295786	FALSE	NoSigChange
Adamts8	chr9	30942563	30962858	+	3632	TKO.DMSO.vs.J1.DMSO	0.947321	3.16529	12.758	0.00035449	0.00265561	FALSE	NoSigChange
Adamts9	chr6	92772699	92901441	-	6036	TKO.DMSO.vs.J1.DMSO	0.929631	5.23983	32.1727	1.41059e-08	3.47444e-07	TRUE	SigIncrease
Adamtsl1	chr4	86053915	86428382	+	7839	TKO.DMSO.vs.J1.DMSO	0.591879	2.59109	5.44407	0.0196348	0.070441	FALSE	NoSigChange
Adamtsl3	chr7	82335694	82614448	+	7285	TKO.DMSO.vs.J1.DMSO	-0.884715	0.784539	1.72518	0.189027	0.368044	FALSE	NoSigChange
Adamtsl4	chr3	95676204	95687858	-	3856	TKO.DMSO.vs.J1.DMSO	0.484261	1.87731	2.84642	0.0915778	0.223075	FALSE	NoSigChange
Adamtsl5	chr10	80340716	80348446	-	2572	TKO.DMSO.vs.J1.DMSO	-1.21039	1.19191	8.21878	0.00414591	0.0206374	FALSE	NoSigChange
Adap1	chr5	139271876	139325464	-	2399	TKO.DMSO.vs.J1.DMSO	0.824473	5.50808	35.2029	2.97075e-09	8.7574e-08	TRUE	SigIncrease
Adap2	chr11	80154162	80178827	+	1597	TKO.DMSO.vs.J1.DMSO	1.98546	3.44396	66.7967	3.00995e-16	2.71109e-14	TRUE	SigIncrease
Adar	chr3	89715022	89753455	+	6039	TKO.DMSO.vs.J1.DMSO	-0.0248945	6.258	0.0500676	0.822946	0.909392	FALSE	NoSigChange
Adarb1	chr10	77290727	77418273	-	6633	TKO.DMSO.vs.J1.DMSO	0.226041	4.83768	2.10683	0.146643	0.308485	FALSE	NoSigChange
Adat1	chr8	111966908	111992302	-	3159	TKO.DMSO.vs.J1.DMSO	-0.614922	4.96584	12.4688	0.000413804	0.00302874	FALSE	NoSigChange
Adat2	chr10	13552907	13563376	+	1453	TKO.DMSO.vs.J1.DMSO	-0.200056	3.92822	1.58776	0.207647	0.392548	FALSE	NoSigChange
Adat3	chr10	80602880	80607654	+	1411	TKO.DMSO.vs.J1.DMSO	0.0712247	3.1536	0.0779764	0.780059	0.881322	FALSE	NoSigChange
Adc	chr4	128932146	128962417	-	1917	TKO.DMSO.vs.J1.DMSO	-0.136202	5.00143	0.433511	0.510271	0.697383	FALSE	NoSigChange
Adck1	chr12	88360801	88461718	+	2287	TKO.DMSO.vs.J1.DMSO	0.359079	4.86553	5.71586	0.0168124	0.062365	FALSE	NoSigChange
Adck2	chr6	39573876	39588769	+	3539	TKO.DMSO.vs.J1.DMSO	0.182022	3.42005	0.772665	0.379394	0.579077	FALSE	NoSigChange
Adck3	chr1	180165238	180196020	-	4076	TKO.DMSO.vs.J1.DMSO	0.768251	3.65177	9.93508	0.00162159	0.00957851	FALSE	NoSigChange
Adck4	chr7	27233013	27257949	+	2190	TKO.DMSO.vs.J1.DMSO	-0.238852	4.17914	1.61061	0.204406	0.388449	FALSE	NoSigChange
Adck5	chr15	76576359	76595811	+	2034	TKO.DMSO.vs.J1.DMSO	-0.452341	4.48923	9.88254	0.00166854	0.00977995	FALSE	NoSigChange
Adcy1	chr11	7063489	7178505	+	12258	TKO.DMSO.vs.J1.DMSO	0.387588	5.07595	3.12225	0.07723	0.197088	FALSE	NoSigChange
Adcy2	chr13	68620043	68999541	-	4211	TKO.DMSO.vs.J1.DMSO	-0.331895	3.25799	1.27591	0.258661	0.454869	FALSE	NoSigChange
Adcy3	chr12	4133397	4213524	+	4730	TKO.DMSO.vs.J1.DMSO	0.429078	5.08354	6.4807	0.0109052	0.0444203	FALSE	NoSigChange
Adcy4	chr14	55769092	55784019	-	3395	TKO.DMSO.vs.J1.DMSO	-0.602238	-0.375942	0.690992	0.405827	0.604807	FALSE	NoSigChange
Adcy5	chr16	35155636	35304549	+	5060	TKO.DMSO.vs.J1.DMSO	-0.700938	2.18958	2.5932	0.107323	0.248128	FALSE	NoSigChange
Adcy6	chr15	98589986	98607633	-	6025	TKO.DMSO.vs.J1.DMSO	-0.689356	3.44184	8.90079	0.00285048	0.0152513	FALSE	NoSigChange
Adcy7	chr8	88272403	88329962	+	6330	TKO.DMSO.vs.J1.DMSO	-0.485304	4.74178	9.87035	0.00167964	0.0098256	FALSE	NoSigChange
Adcy9	chr16	4287545	4419587	-	4457	TKO.DMSO.vs.J1.DMSO	0.615021	3.39382	9.79125	0.00175344	0.0101757	FALSE	NoSigChange
Adcyap1	chr17	93199422	93205489	+	2092	TKO.DMSO.vs.J1.DMSO	0.230717	0.218615	0.186724	0.665657	0.812105	FALSE	NoSigChange
Adcyap1r1	chr6	55451980	55501455	+	6243	TKO.DMSO.vs.J1.DMSO	1.2676	3.41313	22.1261	2.55308e-06	3.67326e-05	FALSE	NoSigChange
Add1	chr5	34573714	34632305	+	4047	TKO.DMSO.vs.J1.DMSO	0.0551745	6.93047	0.254057	0.614233	0.776824	FALSE	NoSigChange
Add2	chr6	86028681	86124409	+	9756	TKO.DMSO.vs.J1.DMSO	-1.09248	2.87845	8.95435	0.0027681	0.0148943	FALSE	NoSigChange
Add3	chr19	53140445	53247399	+	4938	TKO.DMSO.vs.J1.DMSO	0.308059	5.95149	6.17233	0.0129763	0.0510798	FALSE	NoSigChange
Adgb	chr10	10335703	10472314	-	5218	TKO.DMSO.vs.J1.DMSO	-1.32594	-0.63921	1.21689	0.269972	0.468641	FALSE	NoSigChange
Adh1	chr3	138277645	138290691	+	1334	TKO.DMSO.vs.J1.DMSO	2.91707	-0.191528	19.6696	9.20555e-06	0.000114483	FALSE	NoSigChange
Adh4	chr3	138415497	138430892	+	1312	TKO.DMSO.vs.J1.DMSO	1.48229	0.451844	9.30293	0.00228787	0.0127195	FALSE	NoSigChange
Adh5	chr3	138443164	138455499	+	1533	TKO.DMSO.vs.J1.DMSO	0.0315496	8.68937	0.089909	0.764293	0.872511	FALSE	NoSigChange
Adh7	chr3	138217773	138232042	+	2079	TKO.DMSO.vs.J1.DMSO	-0.486616	2.4098	0.629869	0.427403	0.62539	FALSE	NoSigChange
Adhfe1	chr1	9548046	9577968	+	3139	TKO.DMSO.vs.J1.DMSO	0.37911	1.60873	1.19601	0.274121	0.473254	FALSE	NoSigChange
Adi1	chr12	28675207	28682174	+	1675	TKO.DMSO.vs.J1.DMSO	0.234615	4.68438	1.56267	0.211275	0.39704	FALSE	NoSigChange
Adipor1	chr1	134415467	134432341	+	2024	TKO.DMSO.vs.J1.DMSO	-0.137315	7.46283	1.16384	0.28067	0.480634	FALSE	NoSigChange
Adipor2	chr6	119353150	119417483	-	3963	TKO.DMSO.vs.J1.DMSO	-0.0010895	7.48985	0.000110782	0.991602	0.995789	FALSE	NoSigChange
Adk	chr14	21052574	21448569	+	1952	TKO.DMSO.vs.J1.DMSO	-0.401018	7.71061	4.62244	0.0315564	0.101942	FALSE	NoSigChange
Adm	chr7	110627669	110629819	+	1381	TKO.DMSO.vs.J1.DMSO	-0.867389	2.11114	2.72377	0.0988643	0.234739	FALSE	NoSigChange
Adm2	chr15	89322972	89324730	+	1045	TKO.DMSO.vs.J1.DMSO	-0.875176	0.1713	2.62496	0.105195	0.244729	FALSE	NoSigChange
Adnp	chr2	168180965	168207062	-	4903	TKO.DMSO.vs.J1.DMSO	0.0672551	6.64634	0.40464	0.524703	0.709388	FALSE	NoSigChange
Adnp2	chr18	80127135	80151482	-	4188	TKO.DMSO.vs.J1.DMSO	-0.0400631	6.01262	0.103212	0.748009	0.863571	FALSE	NoSigChange
Ado	chr10	67544511	67548955	-	4445	TKO.DMSO.vs.J1.DMSO	-0.0610979	6.45705	0.270991	0.602668	0.768004	FALSE	NoSigChange
Adora1	chr1	134199222	134235431	-	5786	TKO.DMSO.vs.J1.DMSO	0.800301	1.07548	2.31573	0.128071	0.281515	FALSE	NoSigChange
Adora2a	chr10	75316943	75334788	+	2534	TKO.DMSO.vs.J1.DMSO	-1.24761	0.0131471	3.67276	0.0553085	0.154478	FALSE	NoSigChange
Adora2b	chr11	62248984	62266452	+	1844	TKO.DMSO.vs.J1.DMSO	0.295189	2.71424	0.832597	0.361523	0.563323	FALSE	NoSigChange
Adpgk	chr9	59291572	59316200	+	2471	TKO.DMSO.vs.J1.DMSO	0.0809531	6.2461	0.503284	0.478061	0.671252	FALSE	NoSigChange
Adprh	chr16	38445399	38452689	-	1583	TKO.DMSO.vs.J1.DMSO	0.308549	5.94794	5.37401	0.0204389	0.0726748	FALSE	NoSigChange
Adprhl1	chr8	13235662	13254162	-	1365	TKO.DMSO.vs.J1.DMSO	-0.548463	-0.124028	0.770288	0.380128	0.579683	FALSE	NoSigChange
Adprhl2	chr4	126316351	126321703	-	1368	TKO.DMSO.vs.J1.DMSO	-0.197533	5.80882	2.23372	0.135028	0.291505	FALSE	NoSigChange
Adprm	chr11	67037880	67052618	-	1492	TKO.DMSO.vs.J1.DMSO	-0.20606	5.12093	2.2072	0.137367	0.294424	FALSE	NoSigChange
Adra1d	chr2	131545357	131562285	-	2394	TKO.DMSO.vs.J1.DMSO	-1.72878	-0.0626836	5.76683	0.0163315	0.0610956	FALSE	NoSigChange
Adra2b	chr2	127363286	127367221	+	3936	TKO.DMSO.vs.J1.DMSO	0.146295	2.2645	0.139111	0.709166	0.838766	FALSE	NoSigChange
Adra2c	chr5	35278566	35281763	+	3198	TKO.DMSO.vs.J1.DMSO	2.05535	0.883949	9.31633	0.00227121	0.0126407	FALSE	NoSigChange
Adrb1	chr19	56722372	56724862	+	2491	TKO.DMSO.vs.J1.DMSO	0.880586	0.845522	2.61169	0.106078	0.246297	FALSE	NoSigChange
Adrb2	chr18	62177816	62179959	-	2144	TKO.DMSO.vs.J1.DMSO	0.172511	3.85637	0.654317	0.418573	0.617336	FALSE	NoSigChange
Adrb3	chr8	27225776	27229588	-	2795	TKO.DMSO.vs.J1.DMSO	0.273943	5.20977	1.98379	0.158992	0.327184	FALSE	NoSigChange
Adrbk1	chr19	4286001	4305955	-	3182	TKO.DMSO.vs.J1.DMSO	-0.0271852	6.34754	0.0525234	0.818729	0.906524	FALSE	NoSigChange
Adrbk2	chr5	112910478	113015514	-	7560	TKO.DMSO.vs.J1.DMSO	-0.411514	2.95933	3.18778	0.0741905	0.191083	FALSE	NoSigChange
Adrm1	chr2	180171588	180176283	+	1429	TKO.DMSO.vs.J1.DMSO	-0.189202	3.98457	1.0919	0.29605	0.496308	FALSE	NoSigChange
Adsl	chr15	80948490	80970947	+	3712	TKO.DMSO.vs.J1.DMSO	-0.364826	7.70903	11.9658	0.000541866	0.00379058	FALSE	NoSigChange
Adss	chr1	177763178	177796509	-	2553	TKO.DMSO.vs.J1.DMSO	-0.197202	8.81176	3.34859	0.0672625	0.178281	FALSE	NoSigChange
Adssl1	chr12	112620047	112641355	+	1791	TKO.DMSO.vs.J1.DMSO	0.243878	1.8299	0.606843	0.435979	0.632407	FALSE	NoSigChange
Adtrp	chr13	41763148	41847616	-	2566	TKO.DMSO.vs.J1.DMSO	0.770727	0.285156	0.259066	0.610763	0.774134	FALSE	NoSigChange
Aebp1	chr11	5861866	5872225	+	4049	TKO.DMSO.vs.J1.DMSO	0.163504	2.35735	0.398684	0.52777	0.71164	FALSE	NoSigChange
Aebp2	chr6	140622663	140677418	+	6616	TKO.DMSO.vs.J1.DMSO	0.164447	6.48558	1.04641	0.306336	0.506798	FALSE	NoSigChange
Aen	chr7	78895927	78908833	+	2580	TKO.DMSO.vs.J1.DMSO	-0.216926	7.08954	2.77677	0.0956409	0.229484	FALSE	NoSigChange
Aes	chr10	81559444	81566371	+	1505	TKO.DMSO.vs.J1.DMSO	0.540264	5.71069	16.4473	5.00206e-05	0.000492825	FALSE	NoSigChange
AF067061	chr13	120263114	120264517	+	881	TKO.DMSO.vs.J1.DMSO	0.635621	2.79521	1.16593	0.280239	0.480166	FALSE	NoSigChange
AF067063	chr13	119827961	119830217	-	886	TKO.DMSO.vs.J1.DMSO	3.20204	0.0334456	2.56527	0.109234	0.251362	FALSE	NoSigChange
AF357355	chr12	109654627	109654697	+	71	TKO.DMSO.vs.J1.DMSO	0.575714	2.26543	4.38436	0.0362701	0.112905	FALSE	NoSigChange
AF357359	chr12	109650709	109650738	+	30	TKO.DMSO.vs.J1.DMSO	0.419456	3.98259	4.27957	0.0385731	0.118403	FALSE	NoSigChange
AF357399	chr7	28351540	28351633	+	94	TKO.DMSO.vs.J1.DMSO	0.39952	1.81049	2.22577	0.135725	0.292195	FALSE	NoSigChange
AF357425	chr12	109636012	109636080	+	69	TKO.DMSO.vs.J1.DMSO	0.916498	1.20795	8.75329	0.00309044	0.0162351	FALSE	NoSigChange
AF357426	chr12	109642838	109642904	+	67	TKO.DMSO.vs.J1.DMSO	0.901556	1.7131	5.60514	0.0179079	0.0655903	FALSE	NoSigChange
AF529169	chr9	89590035	89622986	-	4244	TKO.DMSO.vs.J1.DMSO	-0.754821	1.59927	3.75176	0.0527521	0.149338	FALSE	NoSigChange
Afap1	chr5	35893319	36003922	+	6617	TKO.DMSO.vs.J1.DMSO	0.686462	5.53259	15.2308	9.51379e-05	0.000862531	FALSE	NoSigChange
Afap1l1	chr18	61730262	61786662	-	3403	TKO.DMSO.vs.J1.DMSO	-1.10757	3.69616	17.4217	2.99396e-05	0.000317368	FALSE	NoSigChange
Afap1l2	chr19	56912354	57008575	-	4075	TKO.DMSO.vs.J1.DMSO	-0.847512	3.197	10.7751	0.00102875	0.00648701	FALSE	NoSigChange
Aff1	chr5	103754162	103855322	+	8496	TKO.DMSO.vs.J1.DMSO	-0.0118091	6.42544	0.00559622	0.940368	0.970907	FALSE	NoSigChange
Aff2	chrX	69360331	69868037	+	4486	TKO.DMSO.vs.J1.DMSO	0.0914528	-0.529549	0.0135161	0.907448	0.95395	FALSE	NoSigChange
Aff3	chr1	38177327	38664955	-	6010	TKO.DMSO.vs.J1.DMSO	-0.367979	4.3106	3.30056	0.0692564	0.181977	FALSE	NoSigChange
Aff4	chr11	53350767	53421830	+	10165	TKO.DMSO.vs.J1.DMSO	-0.0189077	8.60245	0.0247198	0.875067	0.937058	FALSE	NoSigChange
Afg3l1	chr8	123477862	123503916	+	4268	TKO.DMSO.vs.J1.DMSO	-0.452016	6.60722	10.0555	0.00151896	0.00906503	FALSE	NoSigChange
Afg3l2	chr18	67404764	67449136	-	3058	TKO.DMSO.vs.J1.DMSO	0.131658	7.01054	1.43579	0.230822	0.421474	FALSE	NoSigChange
Afmid	chr11	117825919	117839908	+	2332	TKO.DMSO.vs.J1.DMSO	-0.339704	1.92838	1.37811	0.240424	0.433617	FALSE	NoSigChange
Afp	chr5	90490714	90508907	+	2086	TKO.DMSO.vs.J1.DMSO	2.47644	0.55953	6.71178	0.00957778	0.0400091	FALSE	NoSigChange
Aftph	chr11	20685085	20741548	-	3956	TKO.DMSO.vs.J1.DMSO	0.337721	7.03187	5.34952	0.020728	0.0736167	FALSE	NoSigChange
Aga	chr8	53511702	53523422	+	1290	TKO.DMSO.vs.J1.DMSO	0.912363	5.42013	30.5933	3.18187e-08	7.2075e-07	TRUE	SigIncrease
Agap1	chr1	89454811	89895282	+	9581	TKO.DMSO.vs.J1.DMSO	0.121158	6.448	1.0396	0.307914	0.508139	FALSE	NoSigChange
Agap2	chr10	127078907	127093169	+	5633	TKO.DMSO.vs.J1.DMSO	1.05152	2.00252	12.1341	0.000495084	0.00351009	FALSE	NoSigChange
Agap3	chr5	24452177	24502047	+	4126	TKO.DMSO.vs.J1.DMSO	-0.0518564	5.69375	0.146184	0.702209	0.835142	FALSE	NoSigChange
Agbl2	chr2	90782744	90816231	+	3462	TKO.DMSO.vs.J1.DMSO	-0.553189	0.252119	1.34844	0.245552	0.440092	FALSE	NoSigChange
Agbl3	chr6	34780432	34857932	+	3719	TKO.DMSO.vs.J1.DMSO	-0.05699	1.98001	0.0216912	0.882911	0.941681	FALSE	NoSigChange
Agbl5	chr5	30888852	30906666	+	4083	TKO.DMSO.vs.J1.DMSO	-0.365664	4.15998	5.63886	0.0175667	0.0645114	FALSE	NoSigChange
Agfg1	chr1	82839483	82896275	+	3137	TKO.DMSO.vs.J1.DMSO	0.0622024	7.38145	0.342757	0.558242	0.736159	FALSE	NoSigChange
Agfg2	chr5	137650854	137684693	-	3083	TKO.DMSO.vs.J1.DMSO	0.218545	4.65168	2.12109	0.145283	0.306174	FALSE	NoSigChange
Aggf1	chr13	95350717	95375334	-	3197	TKO.DMSO.vs.J1.DMSO	0.182714	7.30244	3.28176	0.0700536	0.183286	FALSE	NoSigChange
Agk	chr6	40325478	40396762	+	2225	TKO.DMSO.vs.J1.DMSO	0.0774128	4.14274	0.268856	0.6041	0.769065	FALSE	NoSigChange
Agl	chr3	116739999	116808166	-	9625	TKO.DMSO.vs.J1.DMSO	0.573513	5.16026	13.3843	0.000253741	0.00200438	FALSE	NoSigChange
Agmat	chr4	141746675	141759263	+	1404	TKO.DMSO.vs.J1.DMSO	-0.866031	0.794651	3.44311	0.0635158	0.170608	FALSE	NoSigChange
Agpat1	chr17	34605861	34613449	+	2253	TKO.DMSO.vs.J1.DMSO	-0.341983	5.86913	5.7683	0.0163178	0.0610594	FALSE	NoSigChange
Agpat2	chr2	26593057	26604417	-	1574	TKO.DMSO.vs.J1.DMSO	0.187196	5.48379	1.51853	0.217841	0.405773	FALSE	NoSigChange
Agpat3	chr10	78271563	78351700	-	3439	TKO.DMSO.vs.J1.DMSO	0.114891	5.20406	0.634878	0.425572	0.623489	FALSE	NoSigChange
Agpat4	chr17	12119284	12219640	+	1910	TKO.DMSO.vs.J1.DMSO	-0.659507	5.62128	14.5053	0.000139764	0.00118921	FALSE	NoSigChange
Agpat5	chr8	18846279	18884413	+	3829	TKO.DMSO.vs.J1.DMSO	0.497393	7.70391	17.5639	2.77819e-05	0.000298234	FALSE	NoSigChange
Agpat6	chr8	23172946	23208453	-	3944	TKO.DMSO.vs.J1.DMSO	-0.109114	7.22955	0.89944	0.342932	0.544953	FALSE	NoSigChange
Agpat9	chr5	100846229	100899102	+	2877	TKO.DMSO.vs.J1.DMSO	0.0696653	4.61562	0.0443227	0.833254	0.914907	FALSE	NoSigChange
Agphd1	chr9	54917290	54949924	+	5103	TKO.DMSO.vs.J1.DMSO	0.190096	3.07643	0.829452	0.362431	0.564218	FALSE	NoSigChange
Agps	chr2	75832177	75931350	+	7359	TKO.DMSO.vs.J1.DMSO	0.0795807	8.81197	0.491812	0.48312	0.676049	FALSE	NoSigChange
Agrn	chr4	156165290	156197488	-	7379	TKO.DMSO.vs.J1.DMSO	-0.472469	7.70752	6.23809	0.0125031	0.0495503	FALSE	NoSigChange
Agtpbp1	chr13	59449535	59557319	-	4856	TKO.DMSO.vs.J1.DMSO	0.252298	5.46402	4.68561	0.0304163	0.0991641	FALSE	NoSigChange
Agtr1a	chr13	30336356	30382867	+	2284	TKO.DMSO.vs.J1.DMSO	-1.66515	1.35046	5.48544	0.0191755	0.0691354	FALSE	NoSigChange
Agtr1b	chr3	20314473	20367177	-	2147	TKO.DMSO.vs.J1.DMSO	0.435384	-0.640046	0.125739	0.722891	0.847703	FALSE	NoSigChange
Agtrap	chr4	148077061	148088064	-	4029	TKO.DMSO.vs.J1.DMSO	0.400122	6.07765	7.71082	0.00548908	0.0258444	FALSE	NoSigChange
Agxt2l2	chr11	51584757	51603269	+	1896	TKO.DMSO.vs.J1.DMSO	-0.0244275	3.31157	0.0181891	0.892717	0.946569	FALSE	NoSigChange
Ahctf1	chr1	179744904	179804015	-	8831	TKO.DMSO.vs.J1.DMSO	-0.116252	9.22402	1.3952	0.237529	0.429835	FALSE	NoSigChange
Ahcy	chr2	155059312	155074497	-	2541	TKO.DMSO.vs.J1.DMSO	-0.189424	3.67251	1.11989	0.289942	0.49028	FALSE	NoSigChange
Ahcyl1	chr3	107663120	107696548	-	3851	TKO.DMSO.vs.J1.DMSO	-0.166133	5.82723	1.73829	0.187355	0.366111	FALSE	NoSigChange
Ahcyl2	chr6	29768443	29912310	+	5385	TKO.DMSO.vs.J1.DMSO	0.565044	6.11595	21.3236	3.87935e-06	5.33919e-05	FALSE	NoSigChange
Ahdc1	chr4	133011506	133078110	+	6602	TKO.DMSO.vs.J1.DMSO	-0.0413293	5.95388	0.0997332	0.75215	0.866185	FALSE	NoSigChange
Ahi1	chr10	20952547	21080429	+	5094	TKO.DMSO.vs.J1.DMSO	0.0319434	5.42356	0.0470543	0.828271	0.912419	FALSE	NoSigChange
Ahnak	chr19	8989284	9076919	+	18543	TKO.DMSO.vs.J1.DMSO	-1.14605	9.2567	29.5137	5.5523e-08	1.18704e-06	TRUE	SigDecrease
Ahr	chr12	35497979	35534989	-	5494	TKO.DMSO.vs.J1.DMSO	-0.215357	5.02509	1.70639	0.191455	0.370873	FALSE	NoSigChange
Ahrr	chr13	74211118	74292309	-	4732	TKO.DMSO.vs.J1.DMSO	-0.128353	2.1781	0.174388	0.676241	0.819566	FALSE	NoSigChange
Ahsa1	chr12	87266728	87273952	+	1320	TKO.DMSO.vs.J1.DMSO	-0.05423	8.06068	0.291016	0.58957	0.758874	FALSE	NoSigChange
Ahsa2	chr11	23487882	23497946	-	3604	TKO.DMSO.vs.J1.DMSO	0.0254231	5.54141	0.0316079	0.858891	0.928295	FALSE	NoSigChange
Ahsg	chr16	22892015	22899451	+	1514	TKO.DMSO.vs.J1.DMSO	0.780851	1.31749	6.76483	0.0092972	0.0391269	FALSE	NoSigChange
AI118078	chr9	55326949	55438344	+	2407	TKO.DMSO.vs.J1.DMSO	-0.0372473	1.19149	0.0106289	0.917886	0.958961	FALSE	NoSigChange
AI197445	chr13	107469822	107479188	+	5610	TKO.DMSO.vs.J1.DMSO	-0.361935	-0.252672	0.309106	0.578229	0.750751	FALSE	NoSigChange
AI314180	chr4	58800031	58912725	-	5901	TKO.DMSO.vs.J1.DMSO	0.119043	6.69134	1.04305	0.307114	0.507589	FALSE	NoSigChange
AI316807	chr8	22462614	22476879	-	1459	TKO.DMSO.vs.J1.DMSO	-0.509282	3.18026	5.20332	0.0225438	0.0787611	FALSE	NoSigChange
AI317395	chr10	40001573	40025268	-	2679	TKO.DMSO.vs.J1.DMSO	-0.321588	0.959217	0.491009	0.483477	0.676365	FALSE	NoSigChange
AI413582	chr17	27563769	27565727	-	637	TKO.DMSO.vs.J1.DMSO	-0.536775	2.86844	4.52251	0.0334516	0.106349	FALSE	NoSigChange
AI414108	chr9	27352685	27357543	+	4859	TKO.DMSO.vs.J1.DMSO	-0.0712297	5.19361	0.280129	0.596617	0.763719	FALSE	NoSigChange
AI429214	chr8	36993575	36995533	+	1959	TKO.DMSO.vs.J1.DMSO	-0.514164	1.42769	2.15211	0.142374	0.302009	FALSE	NoSigChange
AI450353	chr11	83293430	83294929	+	1500	TKO.DMSO.vs.J1.DMSO	-0.224893	3.07317	0.836104	0.360513	0.562268	FALSE	NoSigChange
AI462493	chr19	8880014	8880933	-	831	TKO.DMSO.vs.J1.DMSO	-0.0833703	3.97708	0.220512	0.63865	0.793041	FALSE	NoSigChange
AI464131	chr4	41495601	41503075	-	4175	TKO.DMSO.vs.J1.DMSO	0.444987	4.09825	5.6762	0.0171966	0.0634123	FALSE	NoSigChange
AI467606	chr7	127091436	127094049	+	1918	TKO.DMSO.vs.J1.DMSO	-0.158091	3.09784	0.53792	0.463296	0.657986	FALSE	NoSigChange
AI480653	chr16	30955503	31081432	-	3111	TKO.DMSO.vs.J1.DMSO	-0.087267	4.89019	0.306392	0.579903	0.751962	FALSE	NoSigChange
AI504432	chr3	107039504	107054322	+	5544	TKO.DMSO.vs.J1.DMSO	-0.475614	2.11843	2.17053	0.140678	0.29973	FALSE	NoSigChange
AI506816	chr5	23692261	23712667	-	2780	TKO.DMSO.vs.J1.DMSO	0.144702	2.87567	0.304458	0.581101	0.752964	FALSE	NoSigChange
AI593442	chr9	52673042	52679429	-	5617	TKO.DMSO.vs.J1.DMSO	1.3762	-0.251744	4.56725	0.0325889	0.10415	FALSE	NoSigChange
AI597468	chr10	85102627	85117747	+	3778	TKO.DMSO.vs.J1.DMSO	0.0850418	6.12882	0.363408	0.54662	0.727087	FALSE	NoSigChange
AI597479	chr1	43098710	43115946	+	3457	TKO.DMSO.vs.J1.DMSO	-0.140275	6.23739	1.20853	0.271624	0.470482	FALSE	NoSigChange
AI661453	chr17	47436639	47470638	+	5032	TKO.DMSO.vs.J1.DMSO	-0.726351	3.82977	10.011	0.00155608	0.00925624	FALSE	NoSigChange
AI662270	chr11	83223576	83226584	+	1408	TKO.DMSO.vs.J1.DMSO	2.08932	2.73297	35.9518	2.02255e-09	6.18219e-08	TRUE	SigIncrease
AI747448	chr3	144910921	144932529	-	2997	TKO.DMSO.vs.J1.DMSO	-1.36378	-0.206093	6.37807	0.0115539	0.0466137	FALSE	NoSigChange
AI836003	chr15	98167806	98170134	+	2329	TKO.DMSO.vs.J1.DMSO	-0.787423	2.54629	2.2597	0.13278	0.288209	FALSE	NoSigChange
AI837181	chr19	5425144	5427316	+	1545	TKO.DMSO.vs.J1.DMSO	-0.280615	4.07144	2.60769	0.106347	0.246683	FALSE	NoSigChange
AI846148	chr19	7356464	7383026	-	3618	TKO.DMSO.vs.J1.DMSO	0.139256	5.87219	0.826377	0.363322	0.564753	FALSE	NoSigChange
AI848285	chr15	82206952	82212815	-	1804	TKO.DMSO.vs.J1.DMSO	0.398039	2.04546	1.93334	0.164393	0.334366	FALSE	NoSigChange
AI854517	chr7	79500026	79534403	+	3979	TKO.DMSO.vs.J1.DMSO	1.7372	1.33219	33.6578	6.57096e-09	1.76482e-07	TRUE	SigIncrease
AI854703	chr6	48628167	48633688	+	3573	TKO.DMSO.vs.J1.DMSO	1.74258	1.35841	23.9288	9.99629e-07	1.60974e-05	FALSE	NoSigChange
AI987944	chr7	41372930	41393379	-	2931	TKO.DMSO.vs.J1.DMSO	0.165454	4.85495	0.947186	0.330437	0.531759	FALSE	NoSigChange
Aicda	chr6	122553809	122564180	+	2397	TKO.DMSO.vs.J1.DMSO	-0.165223	0.877152	0.130215	0.718209	0.844571	FALSE	NoSigChange
Aida	chr1	183297060	183324501	+	3293	TKO.DMSO.vs.J1.DMSO	-0.0527573	5.18538	0.150146	0.698396	0.832932	FALSE	NoSigChange
Aif1l	chr2	31950303	31973442	+	2953	TKO.DMSO.vs.J1.DMSO	-1.1399	5.06932	59.7615	1.07075e-14	7.79857e-13	TRUE	SigDecrease
Aifm1	chrX	48474944	48513426	-	2100	TKO.DMSO.vs.J1.DMSO	-0.0171382	6.08628	0.0207424	0.885483	0.94297	FALSE	NoSigChange
Aifm2	chr10	61715263	61739260	+	3467	TKO.DMSO.vs.J1.DMSO	0.124521	3.72522	0.446765	0.503875	0.6918	FALSE	NoSigChange
Aifm3	chr16	17489691	17507482	+	2657	TKO.DMSO.vs.J1.DMSO	-0.411525	3.38785	1.91193	0.166749	0.337525	FALSE	NoSigChange
Aig1	chr10	13652709	13868830	-	1054	TKO.DMSO.vs.J1.DMSO	-1.18896	2.1836	16.2405	5.57881e-05	0.000540063	FALSE	NoSigChange
Aim1	chr10	43950307	44004846	-	7416	TKO.DMSO.vs.J1.DMSO	-1.43272	4.99148	22.0056	2.71861e-06	3.89667e-05	FALSE	NoSigChange
Aim1l	chr4	134068452	134092504	+	4761	TKO.DMSO.vs.J1.DMSO	-0.631134	3.56426	9.29	0.00230408	0.0127974	FALSE	NoSigChange
Aim2	chr1	173420604	173466036	+	2537	TKO.DMSO.vs.J1.DMSO	0.5727	4.77458	5.03987	0.0247704	0.0845224	FALSE	NoSigChange
Aimp1	chr3	132660498	132683879	-	1122	TKO.DMSO.vs.J1.DMSO	0.107256	7.27723	0.970184	0.324634	0.525812	FALSE	NoSigChange
Aimp2	chr5	143902704	143909839	-	1185	TKO.DMSO.vs.J1.DMSO	-0.165405	6.32158	1.7593	0.184712	0.362798	FALSE	NoSigChange
Aip	chr19	4113756	4125858	-	2098	TKO.DMSO.vs.J1.DMSO	0.07854	3.45522	0.16293	0.686473	0.825458	FALSE	NoSigChange
Aipl1	chr11	72028722	72037509	-	1570	TKO.DMSO.vs.J1.DMSO	-0.520029	0.142848	0.744483	0.388229	0.587379	FALSE	NoSigChange
Aire	chr10	78030022	78043610	-	2026	TKO.DMSO.vs.J1.DMSO	2.44408	3.66012	116.93	2.97328e-27	6.96297e-25	TRUE	SigIncrease
Airn	chr17	12741311	12859884	+	2188	TKO.DMSO.vs.J1.DMSO	-0.894576	0.460112	2.59612	0.107126	0.247822	FALSE	NoSigChange
Ajuba	chr14	54567469	54577661	-	3503	TKO.DMSO.vs.J1.DMSO	-0.279098	7.92425	1.76172	0.18441	0.362438	FALSE	NoSigChange
AK010878	chr12	102753275	102757810	-	1162	TKO.DMSO.vs.J1.DMSO	-0.611273	4.00766	11.2621	0.000791059	0.00517914	FALSE	NoSigChange
Ak1	chr2	32621758	32635058	+	2365	TKO.DMSO.vs.J1.DMSO	0.337891	7.00327	5.98715	0.0144104	0.0555098	FALSE	NoSigChange
AK129341	chr9	8076633	8134294	-	3647	TKO.DMSO.vs.J1.DMSO	-0.805961	3.84811	16.8942	3.95212e-05	0.000402942	FALSE	NoSigChange
Ak2	chr4	128993224	129011529	+	2275	TKO.DMSO.vs.J1.DMSO	0.180513	7.78275	2.68983	0.100991	0.23856	FALSE	NoSigChange
Ak3	chr19	29020832	29047902	-	2751	TKO.DMSO.vs.J1.DMSO	-0.67895	4.36031	19.4646	1.0248e-05	0.000125601	FALSE	NoSigChange
Ak4	chr4	101419289	101467771	+	5162	TKO.DMSO.vs.J1.DMSO	1.34288	7.05992	69.1821	8.97812e-17	8.64968e-15	TRUE	SigIncrease
Ak5	chr3	152462815	152668140	-	3103	TKO.DMSO.vs.J1.DMSO	-1.9002	-0.22243	10.0337	0.00153703	0.00916079	FALSE	NoSigChange
Ak7	chr12	105705982	105782447	+	3093	TKO.DMSO.vs.J1.DMSO	1.00395	2.69972	10.8847	0.000969601	0.00616768	FALSE	NoSigChange
Akap1	chr11	88830792	88864586	-	3911	TKO.DMSO.vs.J1.DMSO	0.38788	8.23285	7.62065	0.00577038	0.0268631	FALSE	NoSigChange
Akap10	chr11	61871307	61930226	-	3848	TKO.DMSO.vs.J1.DMSO	0.177679	6.18115	1.79748	0.180018	0.356198	FALSE	NoSigChange
Akap11	chr14	78492246	78536860	-	9416	TKO.DMSO.vs.J1.DMSO	0.537553	8.48258	21.0512	4.47173e-06	6.06133e-05	FALSE	NoSigChange
Akap12	chr10	4266329	4359471	+	6247	TKO.DMSO.vs.J1.DMSO	-0.107907	9.63122	0.483552	0.486818	0.678914	FALSE	NoSigChange
Akap13	chr7	75455534	75754609	+	12543	TKO.DMSO.vs.J1.DMSO	0.207579	6.63899	3.48592	0.061893	0.167401	FALSE	NoSigChange
Akap17b	chrX	36608183	36645414	-	6153	TKO.DMSO.vs.J1.DMSO	0.407885	5.82149	9.69964	0.00184304	0.0106228	FALSE	NoSigChange
Akap2	chr4	57845248	57896984	+	6869	TKO.DMSO.vs.J1.DMSO	-0.0927851	5.66499	0.39132	0.531606	0.714788	FALSE	NoSigChange
Akap5	chr12	76324891	76334151	+	6685	TKO.DMSO.vs.J1.DMSO	-0.830393	3.78316	16.4137	5.09153e-05	0.000500667	FALSE	NoSigChange
Akap6	chr12	52699383	53151015	+	10263	TKO.DMSO.vs.J1.DMSO	-2.13317	0.528859	8.105	0.00441434	0.0216767	FALSE	NoSigChange
Akap7	chr10	25169090	25299163	-	3123	TKO.DMSO.vs.J1.DMSO	-0.425193	4.25102	5.82238	0.0158235	0.0596792	FALSE	NoSigChange
Akap8	chr17	32303676	32321153	-	3695	TKO.DMSO.vs.J1.DMSO	-0.208226	7.57971	3.63229	0.0566687	0.157124	FALSE	NoSigChange
Akap8l	chr17	32321424	32350577	-	2072	TKO.DMSO.vs.J1.DMSO	0.0286585	5.37541	0.020505	0.886136	0.943397	FALSE	NoSigChange
Akap9	chr5	3928186	4080204	+	12105	TKO.DMSO.vs.J1.DMSO	-0.113001	6.13315	0.837323	0.360164	0.561983	FALSE	NoSigChange
Akip1	chr7	109703737	109712181	+	973	TKO.DMSO.vs.J1.DMSO	-0.243182	3.65764	1.97525	0.159891	0.328272	FALSE	NoSigChange
Akirin1	chr4	123735195	123750299	-	2370	TKO.DMSO.vs.J1.DMSO	0.24228	6.08243	4.7562	0.0291929	0.0961019	FALSE	NoSigChange
Akirin2	chr4	34550615	34566908	+	1719	TKO.DMSO.vs.J1.DMSO	-0.027268	6.63811	0.0459482	0.83027	0.913234	FALSE	NoSigChange
Akna	chr4	63367128	63403445	-	5475	TKO.DMSO.vs.J1.DMSO	0.239384	3.78811	1.77412	0.182873	0.360396	FALSE	NoSigChange
Akr1a1	chr4	116636510	116651674	-	1414	TKO.DMSO.vs.J1.DMSO	-0.346455	7.96421	7.16022	0.00745383	0.0328886	FALSE	NoSigChange
Akr1b10	chr6	34384247	34396949	+	1341	TKO.DMSO.vs.J1.DMSO	-0.179207	2.93	0.831732	0.361772	0.563596	FALSE	NoSigChange
Akr1b8	chr6	34354164	34368454	+	1304	TKO.DMSO.vs.J1.DMSO	0.275535	5.05062	3.23704	0.0719908	0.186972	FALSE	NoSigChange
Akr1c13	chr13	4191187	4205603	+	1232	TKO.DMSO.vs.J1.DMSO	1.87191	-0.0831496	13.2912	0.000266648	0.0020899	FALSE	NoSigChange
Akr1c14	chr13	4059591	4090422	+	2445	TKO.DMSO.vs.J1.DMSO	0.514136	0.56241	0.855992	0.354863	0.557443	FALSE	NoSigChange
Akr1cl	chr1	65013086	65032748	-	1353	TKO.DMSO.vs.J1.DMSO	1.31193	1.92197	3.99537	0.0456254	0.134171	FALSE	NoSigChange
Akr1e1	chr13	4592490	4609164	-	1713	TKO.DMSO.vs.J1.DMSO	-0.152308	3.28847	0.360715	0.54811	0.728293	FALSE	NoSigChange
Akr7a5	chr4	139310744	139318786	+	1648	TKO.DMSO.vs.J1.DMSO	0.151217	5.07615	1.20856	0.271618	0.470482	FALSE	NoSigChange
Akt1	chr12	112653821	112674276	-	2690	TKO.DMSO.vs.J1.DMSO	-0.0981533	6.04164	0.544007	0.460777	0.655815	FALSE	NoSigChange
Akt1s1	chr7	44849224	44855421	+	1882	TKO.DMSO.vs.J1.DMSO	-0.189737	5.31652	1.29806	0.254567	0.450322	FALSE	NoSigChange
Akt2	chr7	27591560	27639453	+	3241	TKO.DMSO.vs.J1.DMSO	0.0837825	5.06034	0.441565	0.506368	0.693721	FALSE	NoSigChange
Akt3	chr1	177022115	177248767	-	4735	TKO.DMSO.vs.J1.DMSO	-0.759443	5.0904	27.4143	1.6421e-07	3.18776e-06	TRUE	SigDecrease
Aktip	chr8	91123499	91135496	-	2165	TKO.DMSO.vs.J1.DMSO	0.0341005	6.63581	0.0896297	0.764648	0.8726	FALSE	NoSigChange
Alad	chr4	62505984	62520063	-	4601	TKO.DMSO.vs.J1.DMSO	-0.0896066	6.09417	0.354582	0.551531	0.730528	FALSE	NoSigChange
Alas1	chr9	106233455	106247954	-	2702	TKO.DMSO.vs.J1.DMSO	0.20525	6.02777	3.01957	0.0822652	0.205758	FALSE	NoSigChange
Alas2	chrX	150547417	150570622	+	1979	TKO.DMSO.vs.J1.DMSO	2.96127	-0.183903	7.30915	0.00686042	0.0307597	FALSE	NoSigChange
Alcam	chr16	52248996	52452997	-	4959	TKO.DMSO.vs.J1.DMSO	-0.74714	4.0066	5.19515	0.02265	0.0790052	FALSE	NoSigChange
Aldh16a1	chr7	45141840	45154538	-	2567	TKO.DMSO.vs.J1.DMSO	0.522989	6.38626	16.5806	4.66259e-05	0.000465247	FALSE	NoSigChange
Aldh18a1	chr19	40550257	40588463	-	3527	TKO.DMSO.vs.J1.DMSO	-0.472056	6.07157	4.07212	0.0435964	0.13002	FALSE	NoSigChange
Aldh1a1	chr19	20601982	20643462	+	2032	TKO.DMSO.vs.J1.DMSO	-0.972648	2.27041	1.82231	0.177038	0.352013	FALSE	NoSigChange
Aldh1a2	chr9	71215789	71296243	+	2264	TKO.DMSO.vs.J1.DMSO	0.24222	4.13161	0.835854	0.360585	0.562322	FALSE	NoSigChange
Aldh1a3	chr7	66390893	66427477	-	3400	TKO.DMSO.vs.J1.DMSO	-2.07849	2.75992	23.2112	1.45151e-06	2.20949e-05	FALSE	NoSigChange
Aldh1a7	chr19	20692953	20727556	-	2060	TKO.DMSO.vs.J1.DMSO	-0.0956796	0.78646	0.00938767	0.922814	0.961095	FALSE	NoSigChange
Aldh1b1	chr4	45799022	45804608	+	2302	TKO.DMSO.vs.J1.DMSO	0.784484	4.16519	13.1578	0.000286318	0.00221011	FALSE	NoSigChange
Aldh1l1	chr6	90550848	90599171	+	3084	TKO.DMSO.vs.J1.DMSO	0.162413	3.87066	0.7253	0.394411	0.59384	FALSE	NoSigChange
Aldh1l2	chr10	83487447	83534140	-	6030	TKO.DMSO.vs.J1.DMSO	-0.336133	2.32941	1.08208	0.298232	0.498333	FALSE	NoSigChange
Aldh2	chr5	121567687	121593824	-	2207	TKO.DMSO.vs.J1.DMSO	0.210465	7.19707	3.59732	0.0578728	0.159552	FALSE	NoSigChange
Aldh3a1	chr11	61208742	61218416	+	1727	TKO.DMSO.vs.J1.DMSO	-1.81929	1.88436	14.2691	0.000158442	0.00132967	FALSE	NoSigChange
Aldh3a2	chr11	61244755	61267127	-	3131	TKO.DMSO.vs.J1.DMSO	0.180542	6.26043	1.14004	0.285643	0.486088	FALSE	NoSigChange
Aldh3b1	chr19	3913491	3929716	-	1832	TKO.DMSO.vs.J1.DMSO	0.0932519	0.564618	0.0663484	0.79673	0.892014	FALSE	NoSigChange
Aldh3b2	chr19	3972328	3981665	+	2161	TKO.DMSO.vs.J1.DMSO	0.495783	0.671454	0.804642	0.369709	0.570624	FALSE	NoSigChange
Aldh4a1	chr4	139622894	139649691	+	3355	TKO.DMSO.vs.J1.DMSO	0.325015	6.6123	5.79974	0.0160285	0.0602287	FALSE	NoSigChange
Aldh5a1	chr13	24907579	24937661	-	5647	TKO.DMSO.vs.J1.DMSO	-0.050306	5.3327	0.0994856	0.752448	0.866207	FALSE	NoSigChange
Aldh6a1	chr12	84430720	84450950	-	3343	TKO.DMSO.vs.J1.DMSO	0.816865	5.27457	19.3565	1.08447e-05	0.000131957	FALSE	NoSigChange
Aldh7a1	chr18	56525736	56572939	-	3199	TKO.DMSO.vs.J1.DMSO	-0.218631	6.66417	3.73535	0.0532727	0.150309	FALSE	NoSigChange
Aldh9a1	chr1	167349991	167368530	+	2833	TKO.DMSO.vs.J1.DMSO	-0.310229	6.39568	5.06826	0.0243679	0.0835047	FALSE	NoSigChange
Aldoa	chr7	126795234	126800447	-	1824	TKO.DMSO.vs.J1.DMSO	0.159814	9.32836	1.80694	0.178875	0.354444	FALSE	NoSigChange
Aldoart1	chr4	72850583	72852634	-	2052	TKO.DMSO.vs.J1.DMSO	0.181836	3.9369	1.23583	0.266277	0.464175	FALSE	NoSigChange
Aldoart2	chr12	55565135	55566709	+	1575	TKO.DMSO.vs.J1.DMSO	0.0502937	1.11316	0.0241662	0.876463	0.937892	FALSE	NoSigChange
Aldoc	chr11	78324198	78326760	+	1702	TKO.DMSO.vs.J1.DMSO	-0.37636	4.59724	3.91591	0.047831	0.138656	FALSE	NoSigChange
Alg1	chr16	5233621	5244907	+	1759	TKO.DMSO.vs.J1.DMSO	0.270888	5.31628	4.88805	0.0270432	0.0905785	FALSE	NoSigChange
Alg10b	chr15	90224311	90230554	+	3727	TKO.DMSO.vs.J1.DMSO	-0.225781	6.6814	3.42681	0.0641458	0.171876	FALSE	NoSigChange
Alg11	chr8	22060721	22071627	+	4964	TKO.DMSO.vs.J1.DMSO	-0.0390388	7.04811	0.11217	0.737687	0.856838	FALSE	NoSigChange
Alg12	chr15	88805243	88819318	-	2156	TKO.DMSO.vs.J1.DMSO	-0.193957	4.0218	1.37954	0.240179	0.433278	FALSE	NoSigChange
Alg13	chrX	144317966	144374448	+	5405	TKO.DMSO.vs.J1.DMSO	0.155922	8.50796	2.09344	0.147933	0.310555	FALSE	NoSigChange
Alg14	chr3	121291817	121362011	+	910	TKO.DMSO.vs.J1.DMSO	0.00319294	4.34852	0.000325937	0.985596	0.9935	FALSE	NoSigChange
Alg2	chr4	47469833	47474367	-	3055	TKO.DMSO.vs.J1.DMSO	0.175227	4.31321	1.18492	0.276358	0.475765	FALSE	NoSigChange
Alg3	chr16	20605458	20610749	-	1425	TKO.DMSO.vs.J1.DMSO	0.0122125	3.76586	0.00548846	0.940943	0.971383	FALSE	NoSigChange
Alg5	chr3	54735539	54749795	+	1471	TKO.DMSO.vs.J1.DMSO	0.0301808	4.61513	0.0359167	0.849688	0.923721	FALSE	NoSigChange
Alg6	chr4	99715630	99763460	+	3114	TKO.DMSO.vs.J1.DMSO	0.00887093	5.48171	0.00411619	0.948845	0.974846	FALSE	NoSigChange
Alg8	chr7	97371617	97392158	+	2001	TKO.DMSO.vs.J1.DMSO	-0.220608	3.23441	1.10352	0.293496	0.493736	FALSE	NoSigChange
Alg9	chr9	50775225	50843639	+	2778	TKO.DMSO.vs.J1.DMSO	0.0921145	5.07154	0.448231	0.503176	0.691277	FALSE	NoSigChange
Alk	chr17	71868988	72604307	-	5918	TKO.DMSO.vs.J1.DMSO	0.152147	1.19321	0.144387	0.703958	0.836011	FALSE	NoSigChange
Alkbh1	chr12	87428078	87443839	-	1948	TKO.DMSO.vs.J1.DMSO	-0.0919934	5.45174	0.466884	0.494424	0.684255	FALSE	NoSigChange
Alkbh2	chr5	114123934	114128176	-	1065	TKO.DMSO.vs.J1.DMSO	-0.298915	3.92696	2.18229	0.139607	0.298092	FALSE	NoSigChange
Alkbh3	chr2	93980634	94010730	-	1231	TKO.DMSO.vs.J1.DMSO	-0.460978	4.24641	7.84008	0.00511003	0.0244263	FALSE	NoSigChange
Alkbh4	chr5	136138781	136141614	+	1713	TKO.DMSO.vs.J1.DMSO	-0.0118216	4.2882	0.00618184	0.937331	0.969429	FALSE	NoSigChange
Alkbh5	chr11	60537683	60558512	+	6025	TKO.DMSO.vs.J1.DMSO	0.111079	7.62018	0.682762	0.408637	0.607627	FALSE	NoSigChange
Alkbh6	chr7	30308753	30314303	+	945	TKO.DMSO.vs.J1.DMSO	0.0286482	3.62627	0.027789	0.867606	0.933336	FALSE	NoSigChange
Alkbh7	chr17	56997339	56999336	+	935	TKO.DMSO.vs.J1.DMSO	0.427085	4.25311	7.71637	0.00547222	0.0257988	FALSE	NoSigChange
Alkbh8	chr9	3335231	3385846	+	2269	TKO.DMSO.vs.J1.DMSO	-0.0166765	4.7276	0.00902018	0.924335	0.961869	FALSE	NoSigChange
Alms1	chr6	85587531	85702751	+	9984	TKO.DMSO.vs.J1.DMSO	0.0322796	7.4436	0.0826478	0.773741	0.877552	FALSE	NoSigChange
Alox12	chr11	70241455	70255341	-	2991	TKO.DMSO.vs.J1.DMSO	-0.897401	1.14638	4.51558	0.0335874	0.106603	FALSE	NoSigChange
Alox12b	chr11	69157072	69169791	+	2347	TKO.DMSO.vs.J1.DMSO	-0.917751	0.794178	2.07473	0.149756	0.313217	FALSE	NoSigChange
Alox12e	chr11	70315613	70322518	-	2309	TKO.DMSO.vs.J1.DMSO	2.231	0.859568	26.6947	2.38279e-07	4.43952e-06	TRUE	SigIncrease
Alox15	chr11	70344147	70352031	-	2414	TKO.DMSO.vs.J1.DMSO	-0.452789	3.53061	3.31231	0.0687626	0.181216	FALSE	NoSigChange
Alox5	chr6	116410071	116461178	-	2827	TKO.DMSO.vs.J1.DMSO	-1.36508	2.21679	17.4981	2.87596e-05	0.000307645	FALSE	NoSigChange
Alox5ap	chr5	149265058	149288047	+	854	TKO.DMSO.vs.J1.DMSO	-0.823014	1.67838	6.00936	0.0142302	0.0549617	FALSE	NoSigChange
Aloxe3	chr11	69126377	69149115	+	2538	TKO.DMSO.vs.J1.DMSO	0.370649	1.31426	0.774759	0.378749	0.578441	FALSE	NoSigChange
Alpk1	chr3	127670310	127780527	-	4795	TKO.DMSO.vs.J1.DMSO	-2.76568	1.92614	25.8461	3.69759e-07	6.6062e-06	TRUE	SigDecrease
Alpk3	chr7	81057600	81105612	+	6369	TKO.DMSO.vs.J1.DMSO	0.84418	3.98704	18.9941	1.31123e-05	0.000155569	FALSE	NoSigChange
Alpl	chr4	137741732	137796377	-	2516	TKO.DMSO.vs.J1.DMSO	-0.110414	6.42699	0.51935	0.471119	0.665248	FALSE	NoSigChange
Alppl2	chr1	87086691	87089928	-	2112	TKO.DMSO.vs.J1.DMSO	2.18708	1.76873	12.1234	0.000497922	0.00352365	FALSE	NoSigChange
Als2	chr1	59162756	59237231	-	7024	TKO.DMSO.vs.J1.DMSO	0.24511	7.27667	3.99964	0.0455099	0.13396	FALSE	NoSigChange
Als2cl	chr9	110880174	110900530	+	5224	TKO.DMSO.vs.J1.DMSO	0.249133	4.93758	2.21043	0.137081	0.294059	FALSE	NoSigChange
Als2cr11	chr1	59050506	59094900	-	2131	TKO.DMSO.vs.J1.DMSO	3.1052	-0.523644	23.3186	1.37265e-06	2.10418e-05	FALSE	NoSigChange
Alx1	chr10	103007847	103028777	-	2493	TKO.DMSO.vs.J1.DMSO	-0.151444	0.66338	0.128344	0.720155	0.845458	FALSE	NoSigChange
Alx3	chr3	107595031	107605769	+	1867	TKO.DMSO.vs.J1.DMSO	-2.23313	-0.564323	7.52401	0.00608821	0.0280238	FALSE	NoSigChange
Alyref	chr11	120594516	120598365	-	1132	TKO.DMSO.vs.J1.DMSO	-0.144141	8.13725	1.57895	0.208912	0.394185	FALSE	NoSigChange
Alyref2	chr1	171503478	171504750	+	1273	TKO.DMSO.vs.J1.DMSO	-0.0358357	1.91875	0.0148785	0.902917	0.951755	FALSE	NoSigChange
Amacr	chr15	10981756	10996624	+	2575	TKO.DMSO.vs.J1.DMSO	0.0449651	4.58067	0.0685271	0.793493	0.889634	FALSE	NoSigChange
Ambra1	chr2	91730138	91918849	+	5290	TKO.DMSO.vs.J1.DMSO	0.0314109	6.50529	0.0890286	0.765416	0.873011	FALSE	NoSigChange
Amdhd1	chr10	93523338	93540033	-	2421	TKO.DMSO.vs.J1.DMSO	-0.106298	-0.20977	0.0280607	0.866966	0.933043	FALSE	NoSigChange
Amdhd2	chr17	24155833	24163733	-	1463	TKO.DMSO.vs.J1.DMSO	0.31077	4.89535	4.6054	0.0318713	0.102676	FALSE	NoSigChange
Amer1	chrX	95420314	95444840	-	8468	TKO.DMSO.vs.J1.DMSO	0.230496	6.09774	3.6545	0.0559179	0.155723	FALSE	NoSigChange
Amfr	chr8	93971588	94012640	-	3678	TKO.DMSO.vs.J1.DMSO	-0.4816	7.10028	13.3252	0.000261859	0.00205889	FALSE	NoSigChange
Amhr2	chr15	102445367	102454639	+	1947	TKO.DMSO.vs.J1.DMSO	0.231804	2.87225	0.851382	0.356162	0.558456	FALSE	NoSigChange
Amigo1	chr3	108186335	108191777	+	5031	TKO.DMSO.vs.J1.DMSO	0.201979	2.87971	0.775585	0.378495	0.578215	FALSE	NoSigChange
Amigo2	chr15	97244074	97247287	-	3214	TKO.DMSO.vs.J1.DMSO	-0.455296	5.03515	1.76984	0.183402	0.361251	FALSE	NoSigChange
Amigo3	chr9	108053159	108055701	+	2543	TKO.DMSO.vs.J1.DMSO	0.386395	1.33944	0.845985	0.357691	0.559701	FALSE	NoSigChange
Ammecr1	chrX	142853474	142966728	-	3109	TKO.DMSO.vs.J1.DMSO	-0.265094	4.82747	2.64168	0.104093	0.243135	FALSE	NoSigChange
Ammecr1l	chr18	31759824	31784083	+	5353	TKO.DMSO.vs.J1.DMSO	-0.211682	5.53742	2.63328	0.104645	0.243975	FALSE	NoSigChange
Amn	chr12	111271111	111276426	+	1685	TKO.DMSO.vs.J1.DMSO	0.532878	2.42682	2.72835	0.0985814	0.234287	FALSE	NoSigChange
Amn1	chr6	149157577	149188712	-	1027	TKO.DMSO.vs.J1.DMSO	-0.16387	3.27745	0.476871	0.489843	0.680995	FALSE	NoSigChange
Amot	chrX	145446424	145487046	-	6365	TKO.DMSO.vs.J1.DMSO	-1.04897	5.97677	20.8386	4.99655e-06	6.67172e-05	FALSE	NoSigChange
Amotl1	chr9	14541967	14615000	-	8950	TKO.DMSO.vs.J1.DMSO	-1.05038	6.96847	22.4386	2.16968e-06	3.17221e-05	FALSE	NoSigChange
Amotl2	chr9	102717804	102733417	+	4191	TKO.DMSO.vs.J1.DMSO	-0.811507	7.71665	20.0011	7.73958e-06	9.83404e-05	FALSE	NoSigChange
Ampd2	chr3	108074062	108086627	-	3650	TKO.DMSO.vs.J1.DMSO	-0.130331	5.7916	0.742075	0.388997	0.588191	FALSE	NoSigChange
Ampd3	chr7	110768206	110812408	+	4271	TKO.DMSO.vs.J1.DMSO	0.653825	1.88731	3.30224	0.0691853	0.181858	FALSE	NoSigChange
Amph	chr13	18948371	19150915	+	3195	TKO.DMSO.vs.J1.DMSO	0.688317	5.04271	24.2142	8.61936e-07	1.41842e-05	FALSE	NoSigChange
Amt	chr9	108296922	108301597	+	1325	TKO.DMSO.vs.J1.DMSO	-0.291567	6.62746	3.03905	0.0812836	0.20404	FALSE	NoSigChange
Amz1	chr5	140724127	140753312	+	2685	TKO.DMSO.vs.J1.DMSO	-0.217703	2.25871	0.798661	0.371494	0.571778	FALSE	NoSigChange
Amz2	chr11	109425946	109438148	+	3082	TKO.DMSO.vs.J1.DMSO	-0.306273	5.20639	5.69087	0.0170534	0.0630982	FALSE	NoSigChange
Anapc1	chr2	128610083	128687395	-	8967	TKO.DMSO.vs.J1.DMSO	-0.117152	8.275	1.2092	0.271491	0.470473	FALSE	NoSigChange
Anapc10	chr8	79711820	79777321	+	2802	TKO.DMSO.vs.J1.DMSO	0.0297338	5.53418	0.0440306	0.833797	0.91494	FALSE	NoSigChange
Anapc11	chr11	120598421	120608198	+	3495	TKO.DMSO.vs.J1.DMSO	0.144669	6.23957	1.68601	0.194128	0.374503	FALSE	NoSigChange
Anapc13	chr9	102626296	102634244	+	408	TKO.DMSO.vs.J1.DMSO	0.0541178	3.80294	0.0881436	0.766551	0.873647	FALSE	NoSigChange
Anapc15	chr7	101896415	101899543	+	799	TKO.DMSO.vs.J1.DMSO	0.0133899	5.26083	0.0113383	0.9152	0.957946	FALSE	NoSigChange
Anapc16	chr10	59987909	60003112	-	1329	TKO.DMSO.vs.J1.DMSO	-0.342169	5.25073	6.60624	0.0101622	0.041978	FALSE	NoSigChange
Anapc2	chr2	25272466	25285916	+	3017	TKO.DMSO.vs.J1.DMSO	0.0500258	4.9911	0.112549	0.737261	0.856838	FALSE	NoSigChange
Anapc4	chr5	52834135	52866734	+	2668	TKO.DMSO.vs.J1.DMSO	-0.1677	7.27812	2.68945	0.101014	0.238579	FALSE	NoSigChange
Anapc5	chr5	122787461	122821339	-	2758	TKO.DMSO.vs.J1.DMSO	0.458773	8.40772	19.7645	8.75953e-06	0.000109653	FALSE	NoSigChange
Anapc7	chr5	122422444	122444911	+	2750	TKO.DMSO.vs.J1.DMSO	0.166332	6.459	1.94807	0.162795	0.332136	FALSE	NoSigChange
Angel1	chr12	86700502	86726460	-	3850	TKO.DMSO.vs.J1.DMSO	0.542349	3.62346	8.10431	0.00441602	0.0216767	FALSE	NoSigChange
Angel2	chr1	190925108	190946491	+	3349	TKO.DMSO.vs.J1.DMSO	-0.131067	5.83059	1.3891	0.238558	0.431171	FALSE	NoSigChange
Angpt1	chr15	42424725	42676795	-	4076	TKO.DMSO.vs.J1.DMSO	-4.55933	0.0283408	27.1664	1.86673e-07	3.56977e-06	TRUE	SigDecrease
Angpt2	chr8	18690263	18741562	-	3560	TKO.DMSO.vs.J1.DMSO	0.943101	0.356878	6.04912	0.0139132	0.0541113	FALSE	NoSigChange
Angptl2	chr2	33215961	33247714	+	3444	TKO.DMSO.vs.J1.DMSO	-1.63252	1.83847	17.1977	3.3685e-05	0.000351442	FALSE	NoSigChange
Angptl4	chr17	33774900	33781575	-	1903	TKO.DMSO.vs.J1.DMSO	0.603781	5.12037	18.726	1.50907e-05	0.000176973	FALSE	NoSigChange
Angptl6	chr9	20873809	20879710	-	1564	TKO.DMSO.vs.J1.DMSO	0.444721	2.7749	2.99506	0.0835188	0.20826	FALSE	NoSigChange
Ank	chr15	27466677	27594907	+	3496	TKO.DMSO.vs.J1.DMSO	0.181383	4.55345	1.00578	0.315915	0.516233	FALSE	NoSigChange
Ank1	chr8	22974882	23150496	+	8616	TKO.DMSO.vs.J1.DMSO	-0.956555	0.238967	3.0429	0.0810911	0.203658	FALSE	NoSigChange
Ank2	chr3	126921607	126998452	-	7547	TKO.DMSO.vs.J1.DMSO	-0.276347	5.18664	4.02075	0.0449436	0.132867	FALSE	NoSigChange
Ank3	chr10	69533708	70027436	+	10685	TKO.DMSO.vs.J1.DMSO	-1.01947	4.43249	26.9188	2.12182e-07	4.00188e-06	TRUE	SigDecrease
Ankef1	chr2	136532321	136555854	+	2723	TKO.DMSO.vs.J1.DMSO	0.738377	0.173045	0.803451	0.370063	0.570775	FALSE	NoSigChange
Ankfy1	chr11	72690002	72772146	+	8034	TKO.DMSO.vs.J1.DMSO	0.145225	7.6251	1.85417	0.173299	0.34669	FALSE	NoSigChange
Ankhd1	chr18	36560603	36658908	+	8231	TKO.DMSO.vs.J1.DMSO	0.0094109	7.74116	0.00796138	0.928902	0.96438	FALSE	NoSigChange
Ankib1	chr5	3690000	3803109	-	6610	TKO.DMSO.vs.J1.DMSO	0.232511	5.79351	4.04426	0.0443219	0.131538	FALSE	NoSigChange
Ankle1	chr8	71406012	71409904	+	2134	TKO.DMSO.vs.J1.DMSO	0.0185863	4.15007	0.0110264	0.91637	0.95843	FALSE	NoSigChange
Ankle2	chr5	110231004	110256651	+	5259	TKO.DMSO.vs.J1.DMSO	0.109361	7.51593	1.02533	0.311257	0.511548	FALSE	NoSigChange
Ankmy1	chr1	92870129	92902906	-	3243	TKO.DMSO.vs.J1.DMSO	2.46814	1.12287	16.0677	6.11187e-05	0.000585493	FALSE	NoSigChange
Ankmy2	chr12	36157124	36197291	+	2446	TKO.DMSO.vs.J1.DMSO	0.0630739	5.92681	0.292945	0.588339	0.757994	FALSE	NoSigChange
Ankra2	chr13	98263076	98274754	+	3281	TKO.DMSO.vs.J1.DMSO	-0.185062	4.40802	1.09304	0.2958	0.495997	FALSE	NoSigChange
Ankrd1	chr19	36111965	36119844	-	1765	TKO.DMSO.vs.J1.DMSO	-1.28993	0.877782	7.83413	0.0051269	0.0244952	FALSE	NoSigChange
Ankrd10	chr8	11611583	11635754	-	4452	TKO.DMSO.vs.J1.DMSO	-0.306361	7.32229	8.15134	0.00430294	0.0212729	FALSE	NoSigChange
Ankrd11	chr8	122883822	123042284	-	8816	TKO.DMSO.vs.J1.DMSO	-0.501499	7.93192	23.5508	1.21661e-06	1.89711e-05	FALSE	NoSigChange
Ankrd12	chr17	65967501	66077046	-	8991	TKO.DMSO.vs.J1.DMSO	0.228643	4.61828	1.25403	0.262784	0.460205	FALSE	NoSigChange
Ankrd13a	chr5	114775140	114805820	+	3252	TKO.DMSO.vs.J1.DMSO	0.228656	7.08105	3.5325	0.0601769	0.164131	FALSE	NoSigChange
Ankrd13b	chr11	77470487	77489678	-	3336	TKO.DMSO.vs.J1.DMSO	0.804375	3.1196	12.1875	0.000481111	0.00343341	FALSE	NoSigChange
Ankrd13c	chr3	157947466	158006837	+	2654	TKO.DMSO.vs.J1.DMSO	0.0300371	5.97721	0.0709681	0.789932	0.887406	FALSE	NoSigChange
Ankrd13d	chr19	4270180	4283137	-	2141	TKO.DMSO.vs.J1.DMSO	0.661744	4.02811	13.8418	0.000198864	0.00161878	FALSE	NoSigChange
Ankrd16	chr2	11777753	11790323	+	2354	TKO.DMSO.vs.J1.DMSO	-0.208815	3.82509	1.04208	0.307338	0.507739	FALSE	NoSigChange
Ankrd17	chr5	90227166	90366185	-	10066	TKO.DMSO.vs.J1.DMSO	-0.168018	8.55921	2.86577	0.0904822	0.220937	FALSE	NoSigChange
Ankrd22	chr19	34122549	34166041	-	1754	TKO.DMSO.vs.J1.DMSO	0.449943	2.15804	0.27863	0.597601	0.764437	FALSE	NoSigChange
Ankrd23	chr1	36530534	36535729	-	1954	TKO.DMSO.vs.J1.DMSO	0.0884193	1.52218	0.0762502	0.782445	0.883428	FALSE	NoSigChange
Ankrd24	chr10	81628540	81647612	+	3658	TKO.DMSO.vs.J1.DMSO	0.252555	3.14152	1.27079	0.259618	0.456067	FALSE	NoSigChange
Ankrd26	chr6	118502564	118562256	-	5704	TKO.DMSO.vs.J1.DMSO	-0.00814192	5.56395	0.00390734	0.950158	0.975865	FALSE	NoSigChange
Ankrd27	chr7	35586247	35639237	+	4953	TKO.DMSO.vs.J1.DMSO	-0.2879	7.00929	7.35144	0.0067009	0.0301868	FALSE	NoSigChange
Ankrd28	chr14	31700015	31830415	-	5229	TKO.DMSO.vs.J1.DMSO	-0.240668	7.04719	4.49783	0.0339379	0.107335	FALSE	NoSigChange
Ankrd32	chr13	77043088	77135468	-	3742	TKO.DMSO.vs.J1.DMSO	0.293312	6.0661	3.5682	0.0588961	0.161564	FALSE	NoSigChange
Ankrd33b	chr15	31291479	31367759	-	8600	TKO.DMSO.vs.J1.DMSO	1.44466	4.1957	44.3468	2.75059e-11	1.20315e-09	TRUE	SigIncrease
Ankrd34a	chr3	96596636	96599778	+	2586	TKO.DMSO.vs.J1.DMSO	-1.01716	0.564964	5.80959	0.015939	0.0599663	FALSE	NoSigChange
Ankrd34b	chr13	92425969	92441658	+	3940	TKO.DMSO.vs.J1.DMSO	1.00002	1.43104	5.01265	0.0251627	0.0855927	FALSE	NoSigChange
Ankrd35	chr3	96670131	96691034	+	4054	TKO.DMSO.vs.J1.DMSO	1.33083	3.51477	57.431	3.50053e-14	2.41109e-12	TRUE	SigIncrease
Ankrd36	chr11	5569684	5689337	+	4491	TKO.DMSO.vs.J1.DMSO	2.34481	0.353017	20.4935	5.98349e-06	7.86535e-05	FALSE	NoSigChange
Ankrd37	chr8	45996908	45999850	-	904	TKO.DMSO.vs.J1.DMSO	0.0493247	3.91654	0.043132	0.835477	0.915448	FALSE	NoSigChange
Ankrd39	chr1	36538173	36547201	-	1786	TKO.DMSO.vs.J1.DMSO	-0.135589	3.21269	0.369442	0.543308	0.724824	FALSE	NoSigChange
Ankrd40	chr11	94328001	94341847	+	3763	TKO.DMSO.vs.J1.DMSO	-0.105188	6.60963	0.714982	0.397795	0.597337	FALSE	NoSigChange
Ankrd42	chr7	92584183	92637142	-	2782	TKO.DMSO.vs.J1.DMSO	0.180477	2.96808	0.614144	0.433232	0.630283	FALSE	NoSigChange
Ankrd44	chr1	54645340	54926387	-	6140	TKO.DMSO.vs.J1.DMSO	0.201779	3.08321	0.735458	0.39112	0.590169	FALSE	NoSigChange
Ankrd45	chr1	161142712	161170507	+	3723	TKO.DMSO.vs.J1.DMSO	0.81464	4.82829	22.7826	1.81403e-06	2.69672e-05	FALSE	NoSigChange
Ankrd46	chr15	36477668	36496791	-	2480	TKO.DMSO.vs.J1.DMSO	-0.165935	5.77903	1.7641	0.184113	0.362137	FALSE	NoSigChange
Ankrd49	chr9	14780198	14782964	-	1764	TKO.DMSO.vs.J1.DMSO	0.031263	5.79131	0.0574655	0.810548	0.900886	FALSE	NoSigChange
Ankrd50	chr3	38449261	38484816	-	4915	TKO.DMSO.vs.J1.DMSO	-0.519105	4.69976	12.1596	0.000488361	0.00347051	FALSE	NoSigChange
Ankrd52	chr10	128377124	128394006	+	6615	TKO.DMSO.vs.J1.DMSO	-0.381756	4.25398	4.57641	0.0324151	0.103748	FALSE	NoSigChange
Ankrd54	chr15	79053094	79062859	-	1878	TKO.DMSO.vs.J1.DMSO	0.0244181	4.67722	0.0291335	0.864471	0.931873	FALSE	NoSigChange
Ankrd6	chr4	32804035	32950826	-	4817	TKO.DMSO.vs.J1.DMSO	0.0251968	5.72974	0.0269793	0.869531	0.934482	FALSE	NoSigChange
Ankrd9	chr12	110975353	110979021	-	2558	TKO.DMSO.vs.J1.DMSO	0.350848	3.97188	3.92921	0.0474542	0.137905	FALSE	NoSigChange
Anks1	chr17	27909340	28062636	+	5646	TKO.DMSO.vs.J1.DMSO	0.107777	5.37663	0.497015	0.480815	0.673735	FALSE	NoSigChange
Anks1b	chr10	89873509	90972984	+	10278	TKO.DMSO.vs.J1.DMSO	-0.677588	2.87237	6.84089	0.00890946	0.0378517	FALSE	NoSigChange
Anks3	chr16	4941415	4964237	-	2483	TKO.DMSO.vs.J1.DMSO	-0.00470885	4.68487	0.000964171	0.975229	0.988937	FALSE	NoSigChange
Anks6	chr4	47015689	47057306	-	3552	TKO.DMSO.vs.J1.DMSO	0.0503091	1.32742	0.0135187	0.907439	0.95395	FALSE	NoSigChange
Ankzf1	chr1	75192160	75199385	+	3050	TKO.DMSO.vs.J1.DMSO	-0.125994	5.14486	0.873445	0.350003	0.552137	FALSE	NoSigChange
Anln	chr9	22331214	22389206	-	5421	TKO.DMSO.vs.J1.DMSO	-0.0103185	8.57093	0.0102384	0.919404	0.959382	FALSE	NoSigChange
Ano1	chr7	144588549	144738592	-	4604	TKO.DMSO.vs.J1.DMSO	-0.142854	0.709489	0.128406	0.72009	0.845458	FALSE	NoSigChange
Ano10	chr9	122175874	122294423	-	2653	TKO.DMSO.vs.J1.DMSO	-1.13337	3.84791	22.8102	1.78818e-06	2.66338e-05	FALSE	NoSigChange
Ano2	chr6	125690419	126040128	+	3927	TKO.DMSO.vs.J1.DMSO	1.81798	0.491445	4.74953	0.0293063	0.0963707	FALSE	NoSigChange
Ano3	chr2	110655201	110950244	-	6316	TKO.DMSO.vs.J1.DMSO	-0.63973	4.16774	10.5839	0.00114076	0.00709337	FALSE	NoSigChange
Ano4	chr10	88948994	89257790	-	4117	TKO.DMSO.vs.J1.DMSO	-0.0974735	0.238351	0.0300579	0.862359	0.930321	FALSE	NoSigChange
Ano5	chr7	51511029	51598707	+	7818	TKO.DMSO.vs.J1.DMSO	-0.258339	1.56061	0.134748	0.713559	0.841696	FALSE	NoSigChange
Ano6	chr15	95790843	95975472	+	5711	TKO.DMSO.vs.J1.DMSO	-0.0861069	6.02604	0.401745	0.52619	0.710517	FALSE	NoSigChange
Ano7	chr1	93373896	93404304	+	4019	TKO.DMSO.vs.J1.DMSO	0.459199	-0.018816	0.867686	0.351597	0.553684	FALSE	NoSigChange
Ano8	chr8	71476019	71486067	-	3757	TKO.DMSO.vs.J1.DMSO	0.284283	4.79265	2.56299	0.109391	0.251648	FALSE	NoSigChange
Ano9	chr7	141101219	141117806	-	3012	TKO.DMSO.vs.J1.DMSO	0.382197	5.25252	4.82922	0.0279812	0.0929775	FALSE	NoSigChange
Anp32a	chr9	62341343	62378805	+	2092	TKO.DMSO.vs.J1.DMSO	0.251255	5.84018	2.85005	0.0913709	0.222785	FALSE	NoSigChange
Anp32b	chr4	46451117	46472523	+	1367	TKO.DMSO.vs.J1.DMSO	0.0753084	4.36842	0.286081	0.592743	0.760271	FALSE	NoSigChange
Anp32e	chr3	95929257	95947387	+	3260	TKO.DMSO.vs.J1.DMSO	0.19654	7.03259	1.90482	0.16754	0.338281	FALSE	NoSigChange
Anpep	chr7	79821803	79842352	-	3423	TKO.DMSO.vs.J1.DMSO	0.395253	2.69502	2.30749	0.128752	0.282604	FALSE	NoSigChange
Antxr1	chr6	87133853	87335775	-	5264	TKO.DMSO.vs.J1.DMSO	-1.14885	1.9167	7.79732	0.00523238	0.0248432	FALSE	NoSigChange
Antxr2	chr5	97884688	98030962	-	3751	TKO.DMSO.vs.J1.DMSO	-2.4069	2.55089	38.4379	5.65231e-10	1.92913e-08	TRUE	SigDecrease
Anxa1	chr19	20373434	20390671	-	1395	TKO.DMSO.vs.J1.DMSO	-1.44604	6.20485	69.5442	7.47219e-17	7.38582e-15	TRUE	SigDecrease
Anxa11	chr14	25842155	25886804	+	2395	TKO.DMSO.vs.J1.DMSO	-0.366364	4.2392	5.47228	0.0193204	0.069559	FALSE	NoSigChange
Anxa2	chr9	69453683	69491785	+	1374	TKO.DMSO.vs.J1.DMSO	-1.0304	6.83122	22.3521	2.26962e-06	3.29973e-05	FALSE	NoSigChange
Anxa3	chr5	96793385	96845968	+	1597	TKO.DMSO.vs.J1.DMSO	-3.6601	5.89968	145.262	1.88262e-33	6.66449e-31	TRUE	SigDecrease
Anxa4	chr6	86736840	86793584	-	2003	TKO.DMSO.vs.J1.DMSO	-0.229066	5.02835	2.74055	0.0978309	0.233296	FALSE	NoSigChange
Anxa5	chr3	36448924	36475887	-	1723	TKO.DMSO.vs.J1.DMSO	-1.76776	5.48377	109.207	1.46181e-25	3.17882e-23	TRUE	SigDecrease
Anxa6	chr11	54978962	55033471	-	2661	TKO.DMSO.vs.J1.DMSO	-0.35141	7.60763	7.05649	0.00789785	0.0343489	FALSE	NoSigChange
Anxa7	chr14	20455261	20480133	-	2965	TKO.DMSO.vs.J1.DMSO	-0.0584317	7.34448	0.228994	0.632271	0.788952	FALSE	NoSigChange
Anxa8	chr14	34085990	34100568	+	1868	TKO.DMSO.vs.J1.DMSO	1.60127	3.29116	33.4743	7.22121e-09	1.915e-07	TRUE	SigIncrease
Aoah	chr13	20794119	21024252	+	2915	TKO.DMSO.vs.J1.DMSO	0.379749	3.46639	4.65346	0.030991	0.100625	FALSE	NoSigChange
Aoc2	chr11	101325063	101329694	+	2535	TKO.DMSO.vs.J1.DMSO	0.300802	2.78279	1.6702	0.196231	0.377341	FALSE	NoSigChange
Aoc3	chr11	101330606	101339430	+	4396	TKO.DMSO.vs.J1.DMSO	-0.313389	0.356011	0.404528	0.52476	0.709388	FALSE	NoSigChange
Aox1	chr1	58029969	58106410	+	4382	TKO.DMSO.vs.J1.DMSO	-0.402323	1.30408	1.36581	0.242532	0.436541	FALSE	NoSigChange
Aox3	chr1	58113136	58200452	+	4360	TKO.DMSO.vs.J1.DMSO	0.602908	2.05133	1.81777	0.177579	0.352748	FALSE	NoSigChange
Aox4	chr1	58210397	58268596	+	4972	TKO.DMSO.vs.J1.DMSO	0.522537	1.99887	1.93996	0.163673	0.333411	FALSE	NoSigChange
Ap1ar	chr3	127807265	127837492	-	2390	TKO.DMSO.vs.J1.DMSO	-0.251658	5.92736	4.41448	0.0356351	0.111337	FALSE	NoSigChange
Ap1b1	chr11	4947521	5042794	+	4543	TKO.DMSO.vs.J1.DMSO	-0.0384521	7.31726	0.138581	0.709696	0.838817	FALSE	NoSigChange
Ap1g1	chr8	109778640	109864208	+	6817	TKO.DMSO.vs.J1.DMSO	-0.474772	7.8582	22.0004	2.72594e-06	3.90237e-05	FALSE	NoSigChange
Ap1g2	chr14	55098850	55106593	-	2673	TKO.DMSO.vs.J1.DMSO	0.116642	2.77391	0.263877	0.607469	0.771687	FALSE	NoSigChange
Ap1m1	chr8	72240132	72257379	+	1964	TKO.DMSO.vs.J1.DMSO	0.00111782	5.244	6.94316e-05	0.993352	0.99646	FALSE	NoSigChange
Ap1m2	chr9	21295457	21312333	-	1738	TKO.DMSO.vs.J1.DMSO	-1.11797	5.22114	21.9182	2.84521e-06	4.02882e-05	FALSE	NoSigChange
Ap1s1	chr5	137034994	137046060	-	1277	TKO.DMSO.vs.J1.DMSO	0.0498895	5.60662	0.165997	0.683694	0.824071	FALSE	NoSigChange
Ap1s2	chrX	163909160	163929546	+	3184	TKO.DMSO.vs.J1.DMSO	0.41738	5.37657	7.2813	0.00696762	0.0311761	FALSE	NoSigChange
Ap1s3	chr1	79606876	79671972	-	2876	TKO.DMSO.vs.J1.DMSO	0.326324	2.64421	1.54014	0.214597	0.401056	FALSE	NoSigChange
Ap2a1	chr7	44900373	44929490	-	3443	TKO.DMSO.vs.J1.DMSO	0.00140127	6.85958	0.00014828	0.990284	0.995253	FALSE	NoSigChange
Ap2a2	chr7	141562180	141633011	+	4639	TKO.DMSO.vs.J1.DMSO	-0.156024	8.1105	1.62215	0.202792	0.386103	FALSE	NoSigChange
Ap2b1	chr11	83302697	83405033	+	5409	TKO.DMSO.vs.J1.DMSO	-0.212194	8.37818	3.29214	0.0696122	0.182539	FALSE	NoSigChange
Ap2m1	chr16	20535504	20544053	+	2057	TKO.DMSO.vs.J1.DMSO	-0.0159081	4.18084	0.00813843	0.928118	0.963829	FALSE	NoSigChange
Ap2s1	chr7	16738444	16749290	+	798	TKO.DMSO.vs.J1.DMSO	0.0283551	6.33005	0.0469925	0.828382	0.912419	FALSE	NoSigChange
Ap3b1	chr13	94358960	94566316	+	4020	TKO.DMSO.vs.J1.DMSO	0.415883	7.00956	12.7646	0.00035325	0.00264885	FALSE	NoSigChange
Ap3b2	chr7	81460399	81493925	-	3806	TKO.DMSO.vs.J1.DMSO	0.139639	4.17312	0.212551	0.644775	0.797391	FALSE	NoSigChange
Ap3d1	chr10	80706978	80742211	-	4730	TKO.DMSO.vs.J1.DMSO	0.242765	7.19642	4.50301	0.0338352	0.107077	FALSE	NoSigChange
Ap3m1	chr14	21033742	21052442	-	4424	TKO.DMSO.vs.J1.DMSO	0.103776	5.80891	0.668634	0.413528	0.611983	FALSE	NoSigChange
Ap3m2	chr8	22787354	22805654	-	3467	TKO.DMSO.vs.J1.DMSO	0.991522	4.48309	29.3789	5.95216e-08	1.26189e-06	TRUE	SigIncrease
Ap3s1	chr18	46741917	46790826	+	1479	TKO.DMSO.vs.J1.DMSO	0.363005	3.60675	3.66917	0.0554279	0.154698	FALSE	NoSigChange
Ap3s2	chr7	79875325	79920640	-	5804	TKO.DMSO.vs.J1.DMSO	-0.028484	6.49338	0.0703996	0.790756	0.88761	FALSE	NoSigChange
Ap4b1	chr3	103809517	103822025	+	2910	TKO.DMSO.vs.J1.DMSO	-0.109058	5.18099	0.615714	0.432644	0.62979	FALSE	NoSigChange
Ap4e1	chr2	127008711	127069814	+	6524	TKO.DMSO.vs.J1.DMSO	0.165366	5.99394	1.70398	0.191768	0.371244	FALSE	NoSigChange
Ap4m1	chr5	138172021	138178685	+	1716	TKO.DMSO.vs.J1.DMSO	-0.210908	4.45315	1.58925	0.207434	0.392243	FALSE	NoSigChange
Ap4s1	chr12	51690966	51738939	+	1113	TKO.DMSO.vs.J1.DMSO	-0.329883	3.30303	2.72803	0.0986009	0.234297	FALSE	NoSigChange
Ap5b1	chr19	5568074	5571261	+	3092	TKO.DMSO.vs.J1.DMSO	0.0169302	3.05247	0.00558906	0.940406	0.970907	FALSE	NoSigChange
Ap5m1	chr14	49066495	49087723	+	3165	TKO.DMSO.vs.J1.DMSO	0.0316913	5.70634	0.0586132	0.808701	0.899924	FALSE	NoSigChange
Ap5s1	chr2	131210440	131213514	+	1432	TKO.DMSO.vs.J1.DMSO	0.177415	2.82679	0.476817	0.489867	0.680995	FALSE	NoSigChange
Ap5z1	chr5	142463931	142478715	+	3817	TKO.DMSO.vs.J1.DMSO	0.333837	4.38773	3.9945	0.045649	0.134171	FALSE	NoSigChange
Apaf1	chr10	90989311	91082743	-	6557	TKO.DMSO.vs.J1.DMSO	-0.199169	7.23882	3.53767	0.0599897	0.163825	FALSE	NoSigChange
Apba1	chr19	23758876	23949597	+	6632	TKO.DMSO.vs.J1.DMSO	-2.41029	0.173736	12.5458	0.000397106	0.00292582	FALSE	NoSigChange
Apba2	chr7	64501706	64753876	+	3319	TKO.DMSO.vs.J1.DMSO	-1.07811	3.44779	11.6837	0.000630496	0.00430763	FALSE	NoSigChange
Apba3	chr10	81268172	81273247	+	2107	TKO.DMSO.vs.J1.DMSO	0.0113834	5.43272	0.0065538	0.935477	0.968038	FALSE	NoSigChange
Apbb1	chr7	105558465	105581653	-	3176	TKO.DMSO.vs.J1.DMSO	-0.215381	5.04646	2.46622	0.116317	0.262152	FALSE	NoSigChange
Apbb2	chr5	66298725	66618817	-	6937	TKO.DMSO.vs.J1.DMSO	0.177349	5.347	1.95071	0.16251	0.331598	FALSE	NoSigChange
Apbb3	chr18	36671159	36679366	-	2062	TKO.DMSO.vs.J1.DMSO	-0.537012	4.39393	11.7205	0.000618155	0.00424045	FALSE	NoSigChange
Apc	chr18	34220984	34322190	+	12449	TKO.DMSO.vs.J1.DMSO	0.071335	7.71648	0.373786	0.540948	0.723005	FALSE	NoSigChange
Apc2	chr10	80301820	80318256	+	9074	TKO.DMSO.vs.J1.DMSO	-0.251291	2.63741	0.905184	0.341395	0.543249	FALSE	NoSigChange
Apcdd1	chr18	62922327	62953195	+	2799	TKO.DMSO.vs.J1.DMSO	0.516285	3.78606	5.62729	0.0176829	0.0648914	FALSE	NoSigChange
Apeh	chr9	108085414	108094480	-	2391	TKO.DMSO.vs.J1.DMSO	-0.247045	5.63937	3.33418	0.0678542	0.179406	FALSE	NoSigChange
Apex1	chr14	50924949	50927188	+	1307	TKO.DMSO.vs.J1.DMSO	-0.137202	7.94792	1.29376	0.255357	0.451139	FALSE	NoSigChange
Apex2	chrX	150571507	150588149	-	1885	TKO.DMSO.vs.J1.DMSO	-0.247835	4.25209	1.88565	0.169693	0.34163	FALSE	NoSigChange
Aph1a	chr3	95893921	95898592	+	3215	TKO.DMSO.vs.J1.DMSO	-0.0758393	3.21019	0.162331	0.68702	0.825595	FALSE	NoSigChange
Aph1b	chr9	66775487	66795423	-	4558	TKO.DMSO.vs.J1.DMSO	0.0896766	1.77356	0.049924	0.823196	0.909602	FALSE	NoSigChange
Aph1c	chr9	66814994	66834706	-	5185	TKO.DMSO.vs.J1.DMSO	-0.27952	1.31615	0.344345	0.557332	0.735641	FALSE	NoSigChange
Api5	chr2	94411727	94438147	-	3702	TKO.DMSO.vs.J1.DMSO	0.109819	8.53768	1.0105	0.314783	0.514885	FALSE	NoSigChange
Apip	chr2	103073675	103092649	+	924	TKO.DMSO.vs.J1.DMSO	0.0555731	4.22776	0.11509	0.734422	0.855346	FALSE	NoSigChange
Apitd1	chr4	149128349	149137600	-	930	TKO.DMSO.vs.J1.DMSO	-0.311917	3.21958	2.2251	0.135784	0.292266	FALSE	NoSigChange
Aplf	chr6	87628429	87672168	-	3278	TKO.DMSO.vs.J1.DMSO	-0.102094	4.98079	0.253481	0.614634	0.777138	FALSE	NoSigChange
Apln	chrX	48025146	48034852	-	3148	TKO.DMSO.vs.J1.DMSO	0.248173	1.91307	0.517872	0.471751	0.66577	FALSE	NoSigChange
Aplp1	chr7	30434980	30445582	-	2392	TKO.DMSO.vs.J1.DMSO	0.271527	4.86065	2.73303	0.0982928	0.233966	FALSE	NoSigChange
Aplp2	chr9	31149557	31211815	-	3694	TKO.DMSO.vs.J1.DMSO	0.0681892	8.87733	0.482676	0.487213	0.679272	FALSE	NoSigChange
Apmap	chr2	150583081	150608523	-	2190	TKO.DMSO.vs.J1.DMSO	0.536905	5.77928	18.4878	1.70993e-05	0.000197336	FALSE	NoSigChange
Apoa1bp	chr3	88056523	88058495	-	905	TKO.DMSO.vs.J1.DMSO	0.343309	5.37808	5.79657	0.0160574	0.0602983	FALSE	NoSigChange
Apob	chr12	7977677	8016839	+	13909	TKO.DMSO.vs.J1.DMSO	-0.100119	3.89717	0.224767	0.635431	0.791339	FALSE	NoSigChange
Apobec1	chr6	122577792	122602444	-	2265	TKO.DMSO.vs.J1.DMSO	-0.272825	3.85814	1.30147	0.253945	0.449698	FALSE	NoSigChange
Apobec2	chr17	48419231	48432728	-	1218	TKO.DMSO.vs.J1.DMSO	0.116877	2.26061	0.111886	0.738007	0.856899	FALSE	NoSigChange
Apobec3	chr15	79892408	79908429	+	2459	TKO.DMSO.vs.J1.DMSO	0.00491973	6.55211	0.0012549	0.971741	0.987009	FALSE	NoSigChange
Apobr	chr7	126585008	126589092	+	3599	TKO.DMSO.vs.J1.DMSO	-0.164628	1.1054	0.188399	0.664253	0.811042	FALSE	NoSigChange
Apoc1	chr7	19689481	19692658	-	540	TKO.DMSO.vs.J1.DMSO	0.838702	3.55609	13.6254	0.000223143	0.00178773	FALSE	NoSigChange
Apod	chr16	31296192	31314596	-	1862	TKO.DMSO.vs.J1.DMSO	0.461631	1.94756	1.46802	0.225659	0.415138	FALSE	NoSigChange
Apoe	chr7	19696244	19699166	-	1251	TKO.DMSO.vs.J1.DMSO	0.291167	8.64948	4.29675	0.0381854	0.117523	FALSE	NoSigChange
Apof	chr10	128267997	128270151	+	1930	TKO.DMSO.vs.J1.DMSO	1.03872	1.88571	6.78023	0.0092173	0.0388658	FALSE	NoSigChange
Apol6	chr15	77045075	77057108	+	3359	TKO.DMSO.vs.J1.DMSO	0.130561	1.54991	0.137483	0.710796	0.839651	FALSE	NoSigChange
Apol7a	chr15	77388217	77399110	-	2392	TKO.DMSO.vs.J1.DMSO	0.462479	1.05916	0.491004	0.48348	0.676365	FALSE	NoSigChange
Apol7b	chr15	77422209	77447460	-	2227	TKO.DMSO.vs.J1.DMSO	-0.101886	1.09249	0.00952702	0.922245	0.960943	FALSE	NoSigChange
Apol8	chr15	77748613	77755229	-	1838	TKO.DMSO.vs.J1.DMSO	-0.675853	0.738483	2.28344	0.130762	0.285329	FALSE	NoSigChange
Apold1	chr6	134982001	134986836	+	3284	TKO.DMSO.vs.J1.DMSO	2.87277	0.571711	21.4519	3.62825e-06	5.0254e-05	FALSE	NoSigChange
Apom	chr17	35128997	35131752	-	715	TKO.DMSO.vs.J1.DMSO	3.00711	1.10864	60.3826	7.80993e-15	5.77101e-13	TRUE	SigIncrease
Apoo	chrX	94367110	94417092	+	1261	TKO.DMSO.vs.J1.DMSO	0.271058	1.77597	0.808803	0.368474	0.569533	FALSE	NoSigChange
Apool	chrX	112311408	112372430	+	960	TKO.DMSO.vs.J1.DMSO	0.0188552	5.00106	0.0182587	0.892513	0.94655	FALSE	NoSigChange
Apopt1	chr12	111713269	111755055	+	1242	TKO.DMSO.vs.J1.DMSO	0.0756749	3.7824	0.102256	0.749139	0.864352	FALSE	NoSigChange
App	chr16	84954436	85173707	-	3357	TKO.DMSO.vs.J1.DMSO	-1.11375	5.32621	54.8018	1.33316e-13	8.52664e-12	TRUE	SigDecrease
Appbp2	chr11	85191310	85235120	-	2405	TKO.DMSO.vs.J1.DMSO	0.0914669	6.91043	0.706071	0.400751	0.599503	FALSE	NoSigChange
Appl1	chr14	26918988	26970551	-	6961	TKO.DMSO.vs.J1.DMSO	-0.162067	7.62491	1.32131	0.250357	0.445531	FALSE	NoSigChange
Appl2	chr10	83600034	83648664	-	2945	TKO.DMSO.vs.J1.DMSO	-0.00698964	4.7191	0.00208775	0.963556	0.983319	FALSE	NoSigChange
Aprt	chr8	122574637	122576907	-	866	TKO.DMSO.vs.J1.DMSO	-0.942637	7.50267	39.1502	3.9242e-10	1.37954e-08	TRUE	SigDecrease
Aptx	chr4	40682078	40703187	-	5740	TKO.DMSO.vs.J1.DMSO	-0.356925	4.58617	6.08045	0.0136686	0.0533087	FALSE	NoSigChange
Aqp11	chr7	97726379	97738247	-	1322	TKO.DMSO.vs.J1.DMSO	0.682468	2.22096	3.87204	0.0490967	0.141329	FALSE	NoSigChange
Aqp3	chr4	41092724	41098183	-	1763	TKO.DMSO.vs.J1.DMSO	1.47862	5.528	14.6173	0.0001317	0.00113326	FALSE	NoSigChange
Aqp4	chr18	15389394	15403684	-	5082	TKO.DMSO.vs.J1.DMSO	-2.43875	-0.332679	1.43897	0.230306	0.421006	FALSE	NoSigChange
Aqp5	chr15	99591028	99594829	+	1551	TKO.DMSO.vs.J1.DMSO	-0.0542613	1.24754	0.016179	0.898785	0.949996	FALSE	NoSigChange
Aqp8	chr7	123462294	123468003	+	1486	TKO.DMSO.vs.J1.DMSO	4.67832	-0.0694143	43.8411	3.56143e-11	1.52447e-09	TRUE	SigIncrease
Aqp9	chr9	71110659	71163289	-	3113	TKO.DMSO.vs.J1.DMSO	0.634821	-0.0402453	2.23811	0.134645	0.291	FALSE	NoSigChange
Aqr	chr2	114101172	114175339	-	4886	TKO.DMSO.vs.J1.DMSO	0.0625418	8.40346	0.381565	0.536767	0.719502	FALSE	NoSigChange
Ar	chrX	98149750	98317147	+	2999	TKO.DMSO.vs.J1.DMSO	0.0255768	0.848362	0.00218146	0.962747	0.982828	FALSE	NoSigChange
Araf	chrX	20848543	20860521	+	3237	TKO.DMSO.vs.J1.DMSO	-0.0289955	5.87059	0.0495572	0.823836	0.909964	FALSE	NoSigChange
Arap1	chr7	101348069	101412586	+	6354	TKO.DMSO.vs.J1.DMSO	0.443437	5.57964	12.74	0.00035792	0.00267334	FALSE	NoSigChange
Arap2	chr5	62602446	62766177	-	7362	TKO.DMSO.vs.J1.DMSO	-0.22018	6.56206	2.97459	0.0845816	0.210204	FALSE	NoSigChange
Arap3	chr18	37972623	37998969	-	5499	TKO.DMSO.vs.J1.DMSO	-1.45744	3.68003	47.3692	5.87985e-12	2.89654e-10	TRUE	SigDecrease
Arc	chr15	74669081	74672570	-	3059	TKO.DMSO.vs.J1.DMSO	-0.130374	5.11348	0.51641	0.472377	0.666159	FALSE	NoSigChange
Arcn1	chr9	44742144	44767808	-	3455	TKO.DMSO.vs.J1.DMSO	0.0660194	7.90115	0.3779	0.53873	0.721357	FALSE	NoSigChange
Areg	chr5	91139615	91148432	+	1199	TKO.DMSO.vs.J1.DMSO	-0.0952245	1.1516	0.00709325	0.93288	0.966402	FALSE	NoSigChange
Arf1	chr11	59211412	59228267	-	2086	TKO.DMSO.vs.J1.DMSO	0.0333425	8.22299	0.097967	0.754283	0.867263	FALSE	NoSigChange
Arf2	chr11	103966871	103985336	+	2659	TKO.DMSO.vs.J1.DMSO	-0.382131	6.5364	5.91415	0.0150197	0.0573872	FALSE	NoSigChange
Arf3	chr15	98737626	98763118	-	3481	TKO.DMSO.vs.J1.DMSO	0.0272962	6.88294	0.057611	0.810313	0.900886	FALSE	NoSigChange
Arf4	chr14	26638197	26657258	+	2042	TKO.DMSO.vs.J1.DMSO	0.125337	7.3201	1.18774	0.275787	0.47514	FALSE	NoSigChange
Arf5	chr6	28423640	28426499	+	933	TKO.DMSO.vs.J1.DMSO	-0.430289	5.68158	10.5219	0.00117967	0.00732042	FALSE	NoSigChange
Arf6	chr12	69372150	69375980	+	3731	TKO.DMSO.vs.J1.DMSO	-0.0968578	7.72765	0.717226	0.397055	0.5967	FALSE	NoSigChange
Arfgap1	chr2	180967225	180982524	+	2993	TKO.DMSO.vs.J1.DMSO	-0.0525741	6.27261	0.177712	0.673347	0.817359	FALSE	NoSigChange
Arfgap2	chr2	91265115	91277371	+	3409	TKO.DMSO.vs.J1.DMSO	-0.334172	5.59314	2.95321	0.0857073	0.212242	FALSE	NoSigChange
Arfgap3	chr15	83299740	83350247	-	2618	TKO.DMSO.vs.J1.DMSO	0.205028	4.29904	1.39279	0.237934	0.43035	FALSE	NoSigChange
Arfgef1	chr1	10137507	10232670	-	7042	TKO.DMSO.vs.J1.DMSO	0.361476	6.75968	11.5117	0.000691592	0.00463763	FALSE	NoSigChange
Arfgef2	chr2	166805581	166898051	+	8776	TKO.DMSO.vs.J1.DMSO	0.315832	6.84656	7.65628	0.0056575	0.0264735	FALSE	NoSigChange
Arfip1	chr3	84496064	84582625	-	3015	TKO.DMSO.vs.J1.DMSO	0.00109214	6.49028	6.65061e-05	0.993493	0.99646	FALSE	NoSigChange
Arfip2	chr7	105634201	105640416	-	3277	TKO.DMSO.vs.J1.DMSO	-0.363036	5.55055	5.73756	0.0166058	0.061803	FALSE	NoSigChange
Arfrp1	chr2	181357690	181365404	-	2596	TKO.DMSO.vs.J1.DMSO	-0.319429	4.39988	4.12604	0.0422281	0.127	FALSE	NoSigChange
Arg1	chr10	24915207	24927470	-	1477	TKO.DMSO.vs.J1.DMSO	-1.52929	1.21236	3.23671	0.072005	0.186977	FALSE	NoSigChange
Arg2	chr12	79130788	79156301	+	1417	TKO.DMSO.vs.J1.DMSO	0.0615679	4.134	0.0215835	0.8832	0.941924	FALSE	NoSigChange
Arglu1	chr8	8666576	8690537	-	1712	TKO.DMSO.vs.J1.DMSO	-0.692392	6.71606	40.5255	1.94069e-10	7.08423e-09	TRUE	SigDecrease
Arhgap1	chr2	91650118	91672320	+	3326	TKO.DMSO.vs.J1.DMSO	-0.388802	6.11655	6.27922	0.0122162	0.0486791	FALSE	NoSigChange
Arhgap10	chr8	77250366	77517907	-	3038	TKO.DMSO.vs.J1.DMSO	-0.00744436	5.58577	0.00340648	0.953458	0.978311	FALSE	NoSigChange
Arhgap11a	chr2	113831492	113848661	-	5017	TKO.DMSO.vs.J1.DMSO	0.0295026	6.08848	0.0574712	0.810538	0.900886	FALSE	NoSigChange
Arhgap12	chr18	6024450	6136098	-	5032	TKO.DMSO.vs.J1.DMSO	0.0239195	7.27224	0.0316354	0.85883	0.928295	FALSE	NoSigChange
Arhgap17	chr7	123279149	123369915	-	3584	TKO.DMSO.vs.J1.DMSO	0.142918	3.6371	0.561172	0.453789	0.649208	FALSE	NoSigChange
Arhgap18	chr10	26772512	26918648	+	3616	TKO.DMSO.vs.J1.DMSO	-0.332646	4.13357	2.45999	0.11678	0.262924	FALSE	NoSigChange
Arhgap19	chr19	41766588	41802084	-	5140	TKO.DMSO.vs.J1.DMSO	0.27518	7.39408	6.55073	0.0104841	0.0430393	FALSE	NoSigChange
Arhgap20	chr9	51765352	51853059	+	6364	TKO.DMSO.vs.J1.DMSO	1.06058	2.35825	5.73924	0.01659	0.0617894	FALSE	NoSigChange
Arhgap21	chr2	20847919	20967721	-	6972	TKO.DMSO.vs.J1.DMSO	-0.397938	6.35141	7.52869	0.00607241	0.0279595	FALSE	NoSigChange
Arhgap22	chr14	33216823	33369936	+	2598	TKO.DMSO.vs.J1.DMSO	0.192827	3.01963	0.866607	0.351896	0.554051	FALSE	NoSigChange
Arhgap23	chr11	97450160	97502400	+	5450	TKO.DMSO.vs.J1.DMSO	-0.251432	5.2649	1.73239	0.188106	0.366954	FALSE	NoSigChange
Arhgap24	chr5	102481391	102897937	+	3346	TKO.DMSO.vs.J1.DMSO	-1.83968	0.735239	9.39023	0.00218145	0.0122351	FALSE	NoSigChange
Arhgap26	chr18	38993145	39376285	+	7899	TKO.DMSO.vs.J1.DMSO	0.196042	3.66373	0.920176	0.337429	0.539192	FALSE	NoSigChange
Arhgap27	chr11	103331484	103363692	-	5626	TKO.DMSO.vs.J1.DMSO	-0.286917	3.73428	2.84367	0.0917347	0.223315	FALSE	NoSigChange
Arhgap28	chr17	67842708	68004108	-	5315	TKO.DMSO.vs.J1.DMSO	-0.0265209	5.1441	0.0379766	0.84549	0.92149	FALSE	NoSigChange
Arhgap29	chr3	121953326	122016153	+	5090	TKO.DMSO.vs.J1.DMSO	-0.298088	6.56762	6.89465	0.00864541	0.0370184	FALSE	NoSigChange
Arhgap30	chr1	171388960	171410239	+	4487	TKO.DMSO.vs.J1.DMSO	1.55473	5.06763	35.9154	2.06078e-09	6.28641e-08	TRUE	SigIncrease
Arhgap31	chr16	38598343	38713035	-	7722	TKO.DMSO.vs.J1.DMSO	-0.465781	1.89699	1.95302	0.162262	0.331292	FALSE	NoSigChange
Arhgap32	chr9	32116136	32265511	+	10972	TKO.DMSO.vs.J1.DMSO	0.401992	6.4651	12.3891	0.000431856	0.00313034	FALSE	NoSigChange
Arhgap33	chr7	30522226	30535009	-	4396	TKO.DMSO.vs.J1.DMSO	-0.412587	0.304128	0.826324	0.363338	0.564753	FALSE	NoSigChange
Arhgap36	chrX	49470450	49500250	+	3039	TKO.DMSO.vs.J1.DMSO	-0.0979697	0.788775	0.0159501	0.8995	0.950182	FALSE	NoSigChange
Arhgap39	chr15	76723985	76818170	-	4587	TKO.DMSO.vs.J1.DMSO	0.500828	4.54075	10.4109	0.00125275	0.00770788	FALSE	NoSigChange
Arhgap4	chrX	73894352	73911298	-	3321	TKO.DMSO.vs.J1.DMSO	0.620723	3.25678	7.81641	0.0051774	0.0246591	FALSE	NoSigChange
Arhgap40	chr2	158512796	158550628	+	2028	TKO.DMSO.vs.J1.DMSO	1.67503	0.219181	8.10963	0.00440308	0.0216485	FALSE	NoSigChange
Arhgap42	chr9	8994953	9239013	-	5404	TKO.DMSO.vs.J1.DMSO	0.11149	4.66957	0.483753	0.486727	0.67885	FALSE	NoSigChange
Arhgap44	chr11	65002039	65162961	-	4074	TKO.DMSO.vs.J1.DMSO	1.19058	5.03801	70.3513	4.96308e-17	5.07033e-15	TRUE	SigIncrease
Arhgap5	chr12	52516077	52567851	+	5196	TKO.DMSO.vs.J1.DMSO	-0.24795	8.15787	2.78859	0.0949375	0.228264	FALSE	NoSigChange
Arhgap6	chrX	168795099	169304435	+	5748	TKO.DMSO.vs.J1.DMSO	-1.366	1.82694	12.0456	0.000519144	0.00364839	FALSE	NoSigChange
Arhgap8	chr15	84720052	84772207	+	1547	TKO.DMSO.vs.J1.DMSO	0.0143415	3.61185	0.00613363	0.937576	0.969616	FALSE	NoSigChange
Arhgap9	chr10	127323727	127329943	+	1811	TKO.DMSO.vs.J1.DMSO	-0.304891	2.6482	1.2789	0.258104	0.454362	FALSE	NoSigChange
Arhgdia	chr11	120577235	120581620	-	2732	TKO.DMSO.vs.J1.DMSO	-0.0868005	8.1659	0.46258	0.49642	0.68546	FALSE	NoSigChange
Arhgdib	chr6	136923709	136941717	-	1100	TKO.DMSO.vs.J1.DMSO	-1.40389	3.42216	45.7144	1.36814e-11	6.36876e-10	TRUE	SigDecrease
Arhgdig	chr17	26199183	26201350	-	1032	TKO.DMSO.vs.J1.DMSO	0.340694	3.90997	2.52635	0.111959	0.255546	FALSE	NoSigChange
Arhgef1	chr7	24902986	24926591	+	3597	TKO.DMSO.vs.J1.DMSO	-0.0360431	4.79738	0.0554845	0.813781	0.902995	FALSE	NoSigChange
Arhgef10	chr8	14911717	15001085	+	5474	TKO.DMSO.vs.J1.DMSO	-0.177191	5.12983	1.30903	0.25257	0.44817	FALSE	NoSigChange
Arhgef10l	chr4	140514485	140665905	-	4664	TKO.DMSO.vs.J1.DMSO	0.38648	4.66087	6.7898	0.00916799	0.0387008	FALSE	NoSigChange
Arhgef11	chr3	87618751	87738033	+	5600	TKO.DMSO.vs.J1.DMSO	0.237101	5.62996	3.77719	0.0519557	0.147358	FALSE	NoSigChange
Arhgef12	chr9	42963842	43105718	-	10483	TKO.DMSO.vs.J1.DMSO	0.141759	6.94633	1.8684	0.171658	0.344176	FALSE	NoSigChange
Arhgef15	chr11	68943154	68956858	-	4136	TKO.DMSO.vs.J1.DMSO	-0.0698863	2.03624	0.0877283	0.767085	0.873981	FALSE	NoSigChange
Arhgef16	chr4	154278470	154299895	-	2717	TKO.DMSO.vs.J1.DMSO	-0.889354	3.85629	17.587	2.74457e-05	0.000295459	FALSE	NoSigChange
Arhgef17	chr7	100869746	100932161	-	10250	TKO.DMSO.vs.J1.DMSO	-0.453694	5.27792	8.89892	0.00285339	0.0152615	FALSE	NoSigChange
Arhgef18	chr8	3393008	3456600	+	5300	TKO.DMSO.vs.J1.DMSO	-0.474007	6.49609	15.5968	7.83868e-05	0.000729342	FALSE	NoSigChange
Arhgef19	chr4	141242884	141257562	+	3397	TKO.DMSO.vs.J1.DMSO	0.67235	1.85419	3.85995	0.0494518	0.141976	FALSE	NoSigChange
Arhgef2	chr3	88616207	88648052	+	4850	TKO.DMSO.vs.J1.DMSO	-0.33766	5.43451	4.01048	0.0452182	0.133311	FALSE	NoSigChange
Arhgef25	chr10	127182521	127190054	-	2387	TKO.DMSO.vs.J1.DMSO	-0.526059	5.46563	12.2201	0.000472762	0.00338494	FALSE	NoSigChange
Arhgef26	chr3	62338777	62462221	+	5205	TKO.DMSO.vs.J1.DMSO	-0.628287	5.34131	6.36788	0.0116205	0.0468574	FALSE	NoSigChange
Arhgef28	chr13	97898595	98206165	-	6259	TKO.DMSO.vs.J1.DMSO	-0.635386	4.57268	13.1105	0.000293645	0.00225637	FALSE	NoSigChange
Arhgef3	chr14	27238039	27403904	+	3585	TKO.DMSO.vs.J1.DMSO	0.486796	5.69507	11.1199	0.000854056	0.0055321	FALSE	NoSigChange
Arhgef33	chr17	80307407	80388689	+	3261	TKO.DMSO.vs.J1.DMSO	1.18866	0.55691	6.3988	0.0114198	0.0461666	FALSE	NoSigChange
Arhgef37	chr18	61493794	61536536	-	3234	TKO.DMSO.vs.J1.DMSO	0.0297968	1.50216	0.00559387	0.94038	0.970907	FALSE	NoSigChange
Arhgef39	chr4	43496144	43499660	-	1622	TKO.DMSO.vs.J1.DMSO	0.0611142	4.4633	0.148888	0.6996	0.833616	FALSE	NoSigChange
Arhgef4	chr1	34801722	34812754	+	2714	TKO.DMSO.vs.J1.DMSO	0.00840075	3.11025	0.00145779	0.969543	0.98591	FALSE	NoSigChange
Arhgef40	chr14	51984833	52006247	+	5643	TKO.DMSO.vs.J1.DMSO	-1.05306	3.53565	25.333	4.82388e-07	8.38232e-06	TRUE	SigDecrease
Arhgef5	chr6	43265644	43289320	+	5407	TKO.DMSO.vs.J1.DMSO	-1.23888	4.94218	32.9139	9.63338e-09	2.47284e-07	TRUE	SigDecrease
Arhgef6	chrX	57231485	57338729	-	4569	TKO.DMSO.vs.J1.DMSO	0.913273	1.59399	7.76754	0.00531935	0.0251854	FALSE	NoSigChange
Arhgef7	chr8	11728105	11835217	+	7433	TKO.DMSO.vs.J1.DMSO	0.0517874	6.15211	0.190713	0.662324	0.80966	FALSE	NoSigChange
Arhgef9	chrX	95048944	95166486	-	5012	TKO.DMSO.vs.J1.DMSO	-0.332755	2.41312	1.29195	0.255689	0.451467	FALSE	NoSigChange
Arid1a	chr4	133679008	133753611	-	8175	TKO.DMSO.vs.J1.DMSO	-0.0712221	6.94188	0.465219	0.495195	0.684792	FALSE	NoSigChange
Arid1b	chr17	4995074	5347656	+	11325	TKO.DMSO.vs.J1.DMSO	0.296126	5.0523	4.91418	0.026637	0.0896064	FALSE	NoSigChange
Arid2	chr15	96287522	96405463	+	9029	TKO.DMSO.vs.J1.DMSO	-0.771012	6.85093	37.7944	7.86058e-10	2.60683e-08	TRUE	SigDecrease
Arid3a	chr10	79927072	79955012	+	5326	TKO.DMSO.vs.J1.DMSO	-0.252596	5.4842	3.48374	0.0619744	0.167532	FALSE	NoSigChange
Arid3b	chr9	57790505	57834234	-	3791	TKO.DMSO.vs.J1.DMSO	-0.0204038	5.86324	0.0160669	0.899134	0.95013	FALSE	NoSigChange
Arid3c	chr4	41723836	41731142	-	1751	TKO.DMSO.vs.J1.DMSO	-0.290457	1.01693	0.489058	0.484348	0.677082	FALSE	NoSigChange
Arid4a	chr12	71015967	71099351	+	5780	TKO.DMSO.vs.J1.DMSO	0.489015	5.29032	7.89066	0.00496908	0.0238648	FALSE	NoSigChange
Arid4b	chr13	14063792	14199603	+	6105	TKO.DMSO.vs.J1.DMSO	0.15436	6.1213	1.29213	0.255655	0.45146	FALSE	NoSigChange
Arid5a	chr1	36307733	36324029	+	5699	TKO.DMSO.vs.J1.DMSO	0.262642	3.39472	1.05441	0.304494	0.504833	FALSE	NoSigChange
Arid5b	chr10	68095593	68278726	-	4494	TKO.DMSO.vs.J1.DMSO	0.398723	6.11617	9.48941	0.00206661	0.0116892	FALSE	NoSigChange
Arih1	chr9	59388554	59486374	-	6435	TKO.DMSO.vs.J1.DMSO	-0.0273385	7.76218	0.0665509	0.796427	0.89174	FALSE	NoSigChange
Arih2	chr9	108602943	108649380	-	3923	TKO.DMSO.vs.J1.DMSO	0.424692	6.85907	11.4861	0.000701193	0.00469167	FALSE	NoSigChange
Arl1	chr10	88731414	88743202	+	842	TKO.DMSO.vs.J1.DMSO	0.0570688	5.26013	0.16347	0.685981	0.8254	FALSE	NoSigChange
Arl10	chr13	54575013	54581128	+	1048	TKO.DMSO.vs.J1.DMSO	-0.0925783	3.57654	0.259547	0.610432	0.773945	FALSE	NoSigChange
Arl13b	chr16	62793689	62847040	-	3524	TKO.DMSO.vs.J1.DMSO	-0.236148	5.50461	2.57779	0.108373	0.249909	FALSE	NoSigChange
Arl14ep	chr2	106962529	106974397	-	3389	TKO.DMSO.vs.J1.DMSO	-0.413654	6.69429	7.45989	0.00630887	0.028813	FALSE	NoSigChange
Arl14epl	chr18	46921815	46934222	+	2247	TKO.DMSO.vs.J1.DMSO	1.77815	3.55398	26.6829	2.39735e-07	4.46117e-06	TRUE	SigIncrease
Arl15	chr13	113794508	114157461	+	3361	TKO.DMSO.vs.J1.DMSO	0.197469	5.71124	2.63004	0.104859	0.244252	FALSE	NoSigChange
Arl16	chr11	120464326	120467600	-	2023	TKO.DMSO.vs.J1.DMSO	-0.274473	3.04994	1.8362	0.175397	0.349737	FALSE	NoSigChange
Arl2	chr19	6134389	6141137	-	869	TKO.DMSO.vs.J1.DMSO	-0.362351	4.92637	6.85218	0.00885334	0.0376756	FALSE	NoSigChange
Arl2bp	chr8	94666755	94674423	+	2031	TKO.DMSO.vs.J1.DMSO	-0.762379	6.50784	45.9579	1.20822e-11	5.69395e-10	TRUE	SigDecrease
Arl3	chr19	46531109	46573085	-	822	TKO.DMSO.vs.J1.DMSO	0.0808055	3.74912	0.163325	0.686114	0.8254	FALSE	NoSigChange
Arl4a	chr12	40033291	40037987	-	3807	TKO.DMSO.vs.J1.DMSO	-0.103787	6.25868	0.424222	0.514838	0.701348	FALSE	NoSigChange
Arl4c	chr1	88698226	88702191	-	3966	TKO.DMSO.vs.J1.DMSO	-2.64706	6.01852	172.983	1.6505e-39	8.97282e-37	TRUE	SigDecrease
Arl4d	chr11	101665541	101667832	+	1382	TKO.DMSO.vs.J1.DMSO	0.387436	6.65821	1.96848	0.160609	0.329014	FALSE	NoSigChange
Arl5a	chr2	52397951	52424874	-	5212	TKO.DMSO.vs.J1.DMSO	0.00870948	6.86235	0.00440313	0.947094	0.974355	FALSE	NoSigChange
Arl5b	chr2	15055362	15079191	+	3594	TKO.DMSO.vs.J1.DMSO	0.191944	6.08937	1.98223	0.159156	0.327343	FALSE	NoSigChange
Arl5c	chr11	97989580	97996173	-	1561	TKO.DMSO.vs.J1.DMSO	0.0154494	3.10271	0.00458505	0.946014	0.973646	FALSE	NoSigChange
Arl6	chr16	59613321	59639339	-	1496	TKO.DMSO.vs.J1.DMSO	-0.180282	5.35396	1.20124	0.273075	0.472154	FALSE	NoSigChange
Arl6ip1	chr7	118118890	118129625	-	2135	TKO.DMSO.vs.J1.DMSO	0.189086	8.40476	3.057	0.0803899	0.20245	FALSE	NoSigChange
Arl6ip4	chr5	124116108	124118195	+	1182	TKO.DMSO.vs.J1.DMSO	-0.273037	5.04163	3.46655	0.0626219	0.168773	FALSE	NoSigChange
Arl6ip5	chr6	97210792	97233315	+	1339	TKO.DMSO.vs.J1.DMSO	-0.274168	4.79253	2.34619	0.12559	0.277665	FALSE	NoSigChange
Arl6ip6	chr2	53192084	53219221	+	2553	TKO.DMSO.vs.J1.DMSO	0.162639	6.15447	1.2173	0.269891	0.468553	FALSE	NoSigChange
Arl8a	chr1	135146834	135156268	+	1702	TKO.DMSO.vs.J1.DMSO	-0.211091	4.66089	1.59519	0.206587	0.391334	FALSE	NoSigChange
Arl8b	chr6	108783059	108823723	+	2928	TKO.DMSO.vs.J1.DMSO	0.226344	7.34001	3.42227	0.0643226	0.172259	FALSE	NoSigChange
Armc1	chr3	19132144	19163065	-	2931	TKO.DMSO.vs.J1.DMSO	0.1823	6.92259	1.91228	0.166711	0.337525	FALSE	NoSigChange
Armc10	chr5	21645984	21662592	+	2014	TKO.DMSO.vs.J1.DMSO	-0.238598	6.7322	3.91221	0.0479364	0.138837	FALSE	NoSigChange
Armc2	chr10	41914990	42018382	-	4865	TKO.DMSO.vs.J1.DMSO	1.32513	1.27159	4.34796	0.0370533	0.114803	FALSE	NoSigChange
Armc5	chr7	128237357	128245100	+	3834	TKO.DMSO.vs.J1.DMSO	-0.386806	3.72855	4.12012	0.042376	0.127207	FALSE	NoSigChange
Armc6	chr8	70220193	70234422	-	2198	TKO.DMSO.vs.J1.DMSO	0.0285622	5.88109	0.0595665	0.807182	0.89874	FALSE	NoSigChange
Armc7	chr11	115475677	115490466	+	2249	TKO.DMSO.vs.J1.DMSO	-0.0607994	2.57867	0.0422286	0.837185	0.916148	FALSE	NoSigChange
Armc8	chr9	99478391	99568899	-	6870	TKO.DMSO.vs.J1.DMSO	0.0833366	6.83166	0.607321	0.435798	0.632265	FALSE	NoSigChange
Armc9	chr1	86154780	86278284	+	5256	TKO.DMSO.vs.J1.DMSO	0.129118	4.77275	0.803353	0.370093	0.570775	FALSE	NoSigChange
Armcx1	chrX	134717938	134721912	+	2465	TKO.DMSO.vs.J1.DMSO	-0.166895	5.07858	1.18547	0.276245	0.475625	FALSE	NoSigChange
Armcx2	chrX	134804142	134809221	-	3778	TKO.DMSO.vs.J1.DMSO	-0.426794	6.29823	11.4695	0.000707468	0.00472078	FALSE	NoSigChange
Armcx3	chrX	134756568	134761456	+	3385	TKO.DMSO.vs.J1.DMSO	0.158638	1.74383	0.294094	0.587609	0.757438	FALSE	NoSigChange
Armcx4	chrX	134686519	134697772	+	9011	TKO.DMSO.vs.J1.DMSO	-0.819661	5.19783	21.8008	3.02478e-06	4.25538e-05	FALSE	NoSigChange
Armcx5	chrX	135742692	135747326	+	2824	TKO.DMSO.vs.J1.DMSO	-0.492307	4.16322	9.82114	0.00172517	0.0100423	FALSE	NoSigChange
Armcx6	chrX	134748455	134751419	-	2034	TKO.DMSO.vs.J1.DMSO	-0.394856	2.54105	2.53862	0.111092	0.254445	FALSE	NoSigChange
Arnt	chr3	95434390	95497239	+	4369	TKO.DMSO.vs.J1.DMSO	0.15965	5.89192	1.80348	0.179292	0.355085	FALSE	NoSigChange
Arnt2	chr7	84246279	84409959	-	5990	TKO.DMSO.vs.J1.DMSO	-0.338379	4.22996	4.00078	0.0454793	0.13393	FALSE	NoSigChange
Arntl	chr7	113207465	113314126	+	2908	TKO.DMSO.vs.J1.DMSO	0.160918	5.58243	1.12168	0.289556	0.489899	FALSE	NoSigChange
Arntl2	chr6	146805530	146832646	+	1740	TKO.DMSO.vs.J1.DMSO	1.02007	3.45405	17.3748	3.06874e-05	0.000324392	FALSE	NoSigChange
Arpc1a	chr5	145083869	145108756	+	1588	TKO.DMSO.vs.J1.DMSO	-0.0371048	6.24189	0.107578	0.742918	0.860108	FALSE	NoSigChange
Arpc1b	chr5	145114256	145128186	+	1551	TKO.DMSO.vs.J1.DMSO	0.256824	6.15161	4.53692	0.0331712	0.105634	FALSE	NoSigChange
Arpc2	chr1	74236550	74268213	+	1597	TKO.DMSO.vs.J1.DMSO	-0.256946	7.05774	6.15741	0.0130863	0.051446	FALSE	NoSigChange
Arpc3	chr5	122391928	122406178	+	848	TKO.DMSO.vs.J1.DMSO	-0.107908	6.98264	1.03885	0.308089	0.508262	FALSE	NoSigChange
Arpc4	chr6	113378113	113390447	+	2271	TKO.DMSO.vs.J1.DMSO	-0.28334	7.68997	6.2762	0.012237	0.0487258	FALSE	NoSigChange
Arpc5	chr1	152766542	152775580	+	1897	TKO.DMSO.vs.J1.DMSO	-0.54439	6.47272	12.9782	0.000315142	0.00239975	FALSE	NoSigChange
Arpc5l	chr2	39008139	39015872	+	1271	TKO.DMSO.vs.J1.DMSO	-0.168998	5.91485	2.20124	0.1379	0.295139	FALSE	NoSigChange
Arpp19	chr9	75037614	75060313	+	4138	TKO.DMSO.vs.J1.DMSO	0.0385366	7.32213	0.0986204	0.753492	0.86672	FALSE	NoSigChange
Arrb1	chr7	99535486	99606771	+	7112	TKO.DMSO.vs.J1.DMSO	-0.797118	6.23635	31.522	1.97189e-08	4.69737e-07	TRUE	SigDecrease
Arrb2	chr11	70432580	70440828	+	1988	TKO.DMSO.vs.J1.DMSO	-0.411689	5.53831	10.4694	0.00121368	0.0075131	FALSE	NoSigChange
Arrdc1	chr2	24925352	24935281	-	1772	TKO.DMSO.vs.J1.DMSO	-0.429096	4.62267	7.44831	0.00634959	0.0289729	FALSE	NoSigChange
Arrdc2	chr8	70835138	70839720	-	2346	TKO.DMSO.vs.J1.DMSO	-0.327332	4.44181	2.09114	0.148155	0.31085	FALSE	NoSigChange
Arrdc3	chr13	80883422	80896043	+	4090	TKO.DMSO.vs.J1.DMSO	-0.201358	7.84671	3.11099	0.0777657	0.197951	FALSE	NoSigChange
Arrdc4	chr7	68736994	68749238	-	3955	TKO.DMSO.vs.J1.DMSO	0.780904	6.86496	15.1418	9.97325e-05	0.000897012	FALSE	NoSigChange
Arsa	chr15	89472476	89477424	-	3491	TKO.DMSO.vs.J1.DMSO	-0.347196	3.9381	3.51341	0.060874	0.165289	FALSE	NoSigChange
Arsb	chr13	93771679	93943016	+	3989	TKO.DMSO.vs.J1.DMSO	0.500777	1.71728	1.87431	0.170982	0.343226	FALSE	NoSigChange
Arsg	chr11	109473374	109573329	+	3395	TKO.DMSO.vs.J1.DMSO	-0.789835	1.47264	4.18101	0.0408793	0.123612	FALSE	NoSigChange
Arsi	chr18	60912240	60917768	+	1722	TKO.DMSO.vs.J1.DMSO	-0.668917	0.808725	0.987762	0.32029	0.521105	FALSE	NoSigChange
Arsj	chr3	126363852	126440374	+	3690	TKO.DMSO.vs.J1.DMSO	0.351899	1.09091	0.63536	0.425396	0.623322	FALSE	NoSigChange
Arsk	chr13	76060422	76098660	-	3657	TKO.DMSO.vs.J1.DMSO	-0.232306	2.63173	0.8887	0.34583	0.547786	FALSE	NoSigChange
Art1	chr7	102101743	102111148	+	1417	TKO.DMSO.vs.J1.DMSO	0.784968	-0.042264	3.20254	0.0735241	0.189821	FALSE	NoSigChange
Art3	chr5	92331841	92414627	+	1563	TKO.DMSO.vs.J1.DMSO	0.877608	0.072794	1.87807	0.170553	0.342879	FALSE	NoSigChange
Art5	chr7	102096879	102100229	-	1714	TKO.DMSO.vs.J1.DMSO	0.659675	1.39102	3.23794	0.0719511	0.186901	FALSE	NoSigChange
Artn	chr4	117926162	117929763	-	2177	TKO.DMSO.vs.J1.DMSO	0.115284	0.946492	0.0837122	0.772328	0.876928	FALSE	NoSigChange
Arv1	chr8	124722139	124734123	+	1165	TKO.DMSO.vs.J1.DMSO	-0.731205	3.37631	15.0479	0.000104817	0.000935241	FALSE	NoSigChange
Arvcf	chr16	18348182	18407074	+	5040	TKO.DMSO.vs.J1.DMSO	-0.0475426	5.79572	0.126366	0.72223	0.847175	FALSE	NoSigChange
Arxes1	chrX	136033367	136034946	+	1580	TKO.DMSO.vs.J1.DMSO	0.652757	2.24665	6.73562	0.00945066	0.0396194	FALSE	NoSigChange
Arxes2	chrX	135993820	135995359	+	1540	TKO.DMSO.vs.J1.DMSO	-0.0607271	4.30386	0.144825	0.703531	0.835933	FALSE	NoSigChange
As3mt	chr19	46707443	46741095	+	1751	TKO.DMSO.vs.J1.DMSO	-0.395041	3.62168	3.44731	0.0633548	0.170313	FALSE	NoSigChange
Asah1	chr8	41340643	41374697	-	2251	TKO.DMSO.vs.J1.DMSO	0.184441	7.98052	3.06175	0.0801551	0.202007	FALSE	NoSigChange
Asah2	chr19	31984651	32103140	-	4818	TKO.DMSO.vs.J1.DMSO	-0.881529	1.97604	4.46629	0.03457	0.108967	FALSE	NoSigChange
Asap1	chr15	64086840	64382919	-	6479	TKO.DMSO.vs.J1.DMSO	0.182227	5.0954	1.91088	0.166866	0.337635	FALSE	NoSigChange
Asap2	chr12	21111756	21270171	+	5679	TKO.DMSO.vs.J1.DMSO	0.62149	4.24678	12.0665	0.000513351	0.00361652	FALSE	NoSigChange
Asap3	chr4	136206365	136246573	+	5582	TKO.DMSO.vs.J1.DMSO	0.0640151	4.32844	0.164347	0.685186	0.824889	FALSE	NoSigChange
Asb1	chr1	91540565	91559590	+	6072	TKO.DMSO.vs.J1.DMSO	-0.132992	5.17473	1.01333	0.314107	0.514233	FALSE	NoSigChange
Asb12	chrX	95470199	95478129	-	1260	TKO.DMSO.vs.J1.DMSO	1.98182	1.54874	2.28092	0.130974	0.285669	FALSE	NoSigChange
Asb13	chr13	3634032	3651779	+	2410	TKO.DMSO.vs.J1.DMSO	-1.23544	3.38712	38.8728	4.52347e-10	1.56848e-08	TRUE	SigDecrease
Asb16	chr11	102268823	102278061	+	1362	TKO.DMSO.vs.J1.DMSO	0.627747	0.460618	2.48204	0.115153	0.260553	FALSE	NoSigChange
Asb2	chr12	103321142	103356001	-	2690	TKO.DMSO.vs.J1.DMSO	-0.303137	-0.475827	0.135348	0.71295	0.841216	FALSE	NoSigChange
Asb3	chr11	30954398	31102704	+	3225	TKO.DMSO.vs.J1.DMSO	0.0333753	4.90047	0.0460448	0.830094	0.913182	FALSE	NoSigChange
Asb4	chr6	5383386	5433021	+	3285	TKO.DMSO.vs.J1.DMSO	-0.349866	0.397154	0.447974	0.503299	0.69132	FALSE	NoSigChange
Asb6	chr2	30823098	30828300	-	2113	TKO.DMSO.vs.J1.DMSO	-0.210561	5.9894	2.28764	0.130408	0.285009	FALSE	NoSigChange
Asb7	chr7	66644567	66689561	-	5055	TKO.DMSO.vs.J1.DMSO	-0.0814825	4.94457	0.251454	0.616053	0.778092	FALSE	NoSigChange
Asb8	chr15	98134640	98165578	-	2278	TKO.DMSO.vs.J1.DMSO	-0.348927	4.93875	3.53571	0.0600607	0.163938	FALSE	NoSigChange
Ascc1	chr10	60002805	60099990	+	1578	TKO.DMSO.vs.J1.DMSO	-0.287709	4.54698	3.73563	0.0532635	0.150309	FALSE	NoSigChange
Ascc2	chr11	4637793	4683386	+	2605	TKO.DMSO.vs.J1.DMSO	-0.0201118	5.35442	0.0190203	0.890308	0.94553	FALSE	NoSigChange
Ascc3	chr10	50592669	50851202	+	7477	TKO.DMSO.vs.J1.DMSO	0.245929	7.59304	5.23845	0.022093	0.0775904	FALSE	NoSigChange
Ascl2	chr7	142966822	142969264	-	1612	TKO.DMSO.vs.J1.DMSO	1.02319	2.76532	10.1525	0.00144107	0.00869093	FALSE	NoSigChange
Ascl4	chr10	85928491	85929647	+	1157	TKO.DMSO.vs.J1.DMSO	0.0961227	-0.0784989	0.0573987	0.810656	0.900886	FALSE	NoSigChange
Asf1a	chr10	53596961	53609215	+	2182	TKO.DMSO.vs.J1.DMSO	-0.110474	6.45293	0.878258	0.348679	0.550702	FALSE	NoSigChange
Asf1b	chr8	83955694	83970195	+	1599	TKO.DMSO.vs.J1.DMSO	-0.00644189	6.28941	0.00317114	0.955093	0.979351	FALSE	NoSigChange
Asgr1	chr11	70054369	70057894	+	1245	TKO.DMSO.vs.J1.DMSO	-2.29419	0.257253	5.86537	0.0154416	0.0585886	FALSE	NoSigChange
Asgr2	chr11	70092644	70106186	+	1372	TKO.DMSO.vs.J1.DMSO	1.06645	1.32761	5.38706	0.0202866	0.0722853	FALSE	NoSigChange
Ash1l	chr3	88965812	89079375	+	11270	TKO.DMSO.vs.J1.DMSO	-0.168997	5.94726	2.17547	0.140227	0.299079	FALSE	NoSigChange
Ash2l	chr8	25816870	25847670	-	2517	TKO.DMSO.vs.J1.DMSO	-0.0559442	9.47491	0.268847	0.604106	0.769065	FALSE	NoSigChange
Asic1	chr15	99670718	99701128	+	3764	TKO.DMSO.vs.J1.DMSO	0.400274	3.66624	4.99597	0.0254064	0.086229	FALSE	NoSigChange
Asl	chr5	130011503	130024331	-	1529	TKO.DMSO.vs.J1.DMSO	-0.241441	5.44024	1.75848	0.184814	0.362906	FALSE	NoSigChange
Asna1	chr8	85017931	85025278	-	1253	TKO.DMSO.vs.J1.DMSO	0.00259489	7.83456	0.000487513	0.982384	0.99239	FALSE	NoSigChange
Asns	chr6	7675171	7693182	-	1927	TKO.DMSO.vs.J1.DMSO	-0.121614	8.45587	0.649469	0.420303	0.618628	FALSE	NoSigChange
Asnsd1	chr1	53344644	53352699	-	2362	TKO.DMSO.vs.J1.DMSO	0.00476756	7.71794	0.00147533	0.969361	0.98591	FALSE	NoSigChange
Aspa	chr11	73304988	73324637	-	1537	TKO.DMSO.vs.J1.DMSO	0.463667	2.39459	1.4244	0.232681	0.423871	FALSE	NoSigChange
Aspg	chr12	112106683	112127573	+	2732	TKO.DMSO.vs.J1.DMSO	-0.726985	3.44394	10.1922	0.00141038	0.00853628	FALSE	NoSigChange
Asph	chr4	9449085	9669162	-	12294	TKO.DMSO.vs.J1.DMSO	0.13185	7.21505	1.14982	0.283587	0.484051	FALSE	NoSigChange
Asphd1	chr7	126946008	126949581	-	518	TKO.DMSO.vs.J1.DMSO	0.882192	-0.204581	3.48525	0.0619179	0.167439	FALSE	NoSigChange
Asphd2	chr5	112385445	112392213	-	1587	TKO.DMSO.vs.J1.DMSO	-0.00452135	3.33723	0.000376532	0.984518	0.99346	FALSE	NoSigChange
Aspm	chr1	139454773	139494088	+	9866	TKO.DMSO.vs.J1.DMSO	0.357043	8.25688	10.676	0.00108533	0.00681836	FALSE	NoSigChange
Asprv1	chr6	86628174	86629704	+	1531	TKO.DMSO.vs.J1.DMSO	-0.827793	1.46239	2.41462	0.120207	0.268849	FALSE	NoSigChange
Aspscr1	chr11	120672973	120709446	+	1871	TKO.DMSO.vs.J1.DMSO	0.308304	6.42517	4.77675	0.0288466	0.0951468	FALSE	NoSigChange
Asrgl1	chr19	9111719	9135566	-	2274	TKO.DMSO.vs.J1.DMSO	-0.365653	5.07965	5.99657	0.0143337	0.0553074	FALSE	NoSigChange
Aste1	chr9	105395392	105405756	+	2824	TKO.DMSO.vs.J1.DMSO	-0.285432	4.03871	2.66492	0.102583	0.240901	FALSE	NoSigChange
Astn1	chr1	158362304	158691786	+	7224	TKO.DMSO.vs.J1.DMSO	-1.90406	0.240855	12.6227	0.000381098	0.00282016	FALSE	NoSigChange
Astn2	chr4	65380803	66404483	-	4831	TKO.DMSO.vs.J1.DMSO	1.12073	-0.0468249	3.87374	0.049047	0.14124	FALSE	NoSigChange
Asun	chr6	146549632	146577835	-	3059	TKO.DMSO.vs.J1.DMSO	-0.125834	6.98393	1.23762	0.26593	0.463859	FALSE	NoSigChange
Asxl1	chr2	153346139	153404007	+	6674	TKO.DMSO.vs.J1.DMSO	0.274248	7.07877	6.34641	0.0117619	0.0473025	FALSE	NoSigChange
Asxl2	chr12	3426857	3506849	+	9033	TKO.DMSO.vs.J1.DMSO	0.00378	6.26348	0.00124909	0.971807	0.987009	FALSE	NoSigChange
Asxl3	chr18	22345089	22530227	+	11697	TKO.DMSO.vs.J1.DMSO	-0.0394233	2.8186	0.0251061	0.874103	0.936659	FALSE	NoSigChange
Asz1	chr6	18050964	18109061	-	1740	TKO.DMSO.vs.J1.DMSO	4.91311	4.55596	202.783	5.1576e-46	5.60779e-43	TRUE	SigIncrease
Atad1	chr19	32672563	32712298	-	2813	TKO.DMSO.vs.J1.DMSO	-0.285318	7.28457	4.5615	0.0326984	0.104435	FALSE	NoSigChange
Atad2	chr15	58094047	58135082	-	5683	TKO.DMSO.vs.J1.DMSO	-0.187266	8.41306	1.92623	0.165172	0.335367	FALSE	NoSigChange
Atad2b	chr12	4917353	5047410	+	8102	TKO.DMSO.vs.J1.DMSO	0.167307	6.13876	2.23006	0.135349	0.291841	FALSE	NoSigChange
Atad3a	chr4	155740640	155761098	-	2419	TKO.DMSO.vs.J1.DMSO	0.0116216	7.05875	0.0128265	0.909829	0.955103	FALSE	NoSigChange
Atad5	chr11	80089400	80135791	+	7272	TKO.DMSO.vs.J1.DMSO	0.160146	7.28134	1.75701	0.184998	0.363046	FALSE	NoSigChange
Atat1	chr17	35897598	35910068	-	2483	TKO.DMSO.vs.J1.DMSO	0.141095	2.78425	0.263009	0.608061	0.772033	FALSE	NoSigChange
Atcay	chr10	81204513	81230779	-	3677	TKO.DMSO.vs.J1.DMSO	0.441921	2.43151	3.06549	0.079971	0.201777	FALSE	NoSigChange
Ate1	chr7	130391494	130520369	-	5356	TKO.DMSO.vs.J1.DMSO	0.280793	6.99894	6.24127	0.0124807	0.0494999	FALSE	NoSigChange
Atf1	chr15	100227859	100261248	+	2329	TKO.DMSO.vs.J1.DMSO	0.269186	5.22908	2.06878	0.150342	0.31401	FALSE	NoSigChange
Atf2	chr2	73816522	73892628	-	4276	TKO.DMSO.vs.J1.DMSO	0.105177	7.49485	0.647404	0.421042	0.619249	FALSE	NoSigChange
Atf3	chr1	191170297	191183333	-	1976	TKO.DMSO.vs.J1.DMSO	-1.34824	4.00346	25.6689	4.05307e-07	7.17394e-06	TRUE	SigDecrease
Atf4	chr15	80255184	80257541	+	1725	TKO.DMSO.vs.J1.DMSO	-0.710608	7.45215	12.9015	0.000328312	0.00248388	FALSE	NoSigChange
Atf5	chr7	44812256	44816658	-	1993	TKO.DMSO.vs.J1.DMSO	0.478471	3.85687	7.42889	0.00641851	0.029206	FALSE	NoSigChange
Atf6	chr1	170704457	170867771	-	7463	TKO.DMSO.vs.J1.DMSO	0.240967	6.6812	4.41679	0.035587	0.111289	FALSE	NoSigChange
Atf6b	chr17	34647146	34655074	+	2566	TKO.DMSO.vs.J1.DMSO	0.0606545	5.07284	0.117685	0.731559	0.853619	FALSE	NoSigChange
Atf7	chr15	102536644	102625421	-	2854	TKO.DMSO.vs.J1.DMSO	0.0977926	2.63639	0.159056	0.690027	0.827997	FALSE	NoSigChange
Atf7ip	chr6	136518851	136607379	+	4527	TKO.DMSO.vs.J1.DMSO	0.0283944	5.73947	0.0504005	0.822368	0.908886	FALSE	NoSigChange
Atf7ip2	chr16	10192906	10243051	+	2639	TKO.DMSO.vs.J1.DMSO	0.437629	5.0659	7.79177	0.00524846	0.024904	FALSE	NoSigChange
Atg10	chr13	90935349	91223987	-	1609	TKO.DMSO.vs.J1.DMSO	-0.51089	2.41775	2.30495	0.128963	0.282863	FALSE	NoSigChange
Atg12	chr18	46732417	46741579	-	2492	TKO.DMSO.vs.J1.DMSO	0.281607	6.64085	3.91463	0.0478675	0.138736	FALSE	NoSigChange
Atg13	chr2	91674612	91710592	-	3573	TKO.DMSO.vs.J1.DMSO	0.32679	6.06664	7.59865	0.00584119	0.0271023	FALSE	NoSigChange
Atg14	chr14	47540893	47568434	-	3451	TKO.DMSO.vs.J1.DMSO	0.499217	6.19108	16.1921	5.72329e-05	0.00055244	FALSE	NoSigChange
Atg16l1	chr1	87756011	87792428	+	3180	TKO.DMSO.vs.J1.DMSO	0.0171692	6.87455	0.023325	0.878615	0.939566	FALSE	NoSigChange
Atg16l2	chr7	101289616	101302088	-	2164	TKO.DMSO.vs.J1.DMSO	-0.0667904	3.78011	0.083156	0.773065	0.877328	FALSE	NoSigChange
Atg2a	chr19	6241668	6262304	+	6340	TKO.DMSO.vs.J1.DMSO	0.20026	6.17397	1.20911	0.271509	0.470473	FALSE	NoSigChange
Atg2b	chr12	105613540	105685241	-	10172	TKO.DMSO.vs.J1.DMSO	0.219553	6.94395	4.25098	0.0392277	0.119736	FALSE	NoSigChange
Atg3	chr16	45158829	45188538	+	2013	TKO.DMSO.vs.J1.DMSO	-0.0254105	5.02662	0.0293177	0.864047	0.931482	FALSE	NoSigChange
Atg4a	chr3	103643953	103646068	-	2116	TKO.DMSO.vs.J1.DMSO	0.189982	2.88059	0.86878	0.351293	0.553388	FALSE	NoSigChange
Atg4b	chr1	93755033	93789529	+	2964	TKO.DMSO.vs.J1.DMSO	0.311931	5.73364	6.94311	0.00841425	0.0362222	FALSE	NoSigChange
Atg4c	chr4	99193934	99259787	+	3178	TKO.DMSO.vs.J1.DMSO	-0.428647	3.57541	4.25692	0.0390907	0.119462	FALSE	NoSigChange
Atg4d	chr9	21265299	21274368	+	2541	TKO.DMSO.vs.J1.DMSO	0.264053	4.7315	3.12122	0.0772789	0.197174	FALSE	NoSigChange
Atg5	chr10	44268358	44364291	+	2352	TKO.DMSO.vs.J1.DMSO	0.091309	6.67725	0.533283	0.46523	0.659625	FALSE	NoSigChange
Atg7	chr6	114643097	114860614	+	4033	TKO.DMSO.vs.J1.DMSO	-0.0123865	4.95829	0.00735044	0.931677	0.965747	FALSE	NoSigChange
Atg9a	chr1	75180866	75191923	-	3764	TKO.DMSO.vs.J1.DMSO	-0.104633	4.16558	0.232088	0.62998	0.787062	FALSE	NoSigChange
Atg9b	chr5	24384181	24392143	-	3902	TKO.DMSO.vs.J1.DMSO	0.0933572	3.17086	0.146901	0.701515	0.834824	FALSE	NoSigChange
Athl1	chr7	140941581	140947658	+	2975	TKO.DMSO.vs.J1.DMSO	-0.312832	4.53728	3.21099	0.0731453	0.189035	FALSE	NoSigChange
Atic	chr1	71557156	71579403	+	2611	TKO.DMSO.vs.J1.DMSO	-0.327623	8.22444	8.68785	0.00320339	0.0167337	FALSE	NoSigChange
Atl1	chr12	69893105	69964085	+	2818	TKO.DMSO.vs.J1.DMSO	-0.0966053	3.23541	0.147998	0.700456	0.834299	FALSE	NoSigChange
Atl2	chr17	79848392	79896123	-	3616	TKO.DMSO.vs.J1.DMSO	0.00884509	6.41002	0.00372587	0.951327	0.977001	FALSE	NoSigChange
Atl3	chr19	7494040	7538609	+	6699	TKO.DMSO.vs.J1.DMSO	0.270939	6.57631	4.02231	0.044902	0.13277	FALSE	NoSigChange
Atm	chr9	53437122	53536671	-	11964	TKO.DMSO.vs.J1.DMSO	0.215285	7.96617	4.21168	0.0401466	0.122051	FALSE	NoSigChange
Atmin	chr8	116943393	116960445	+	4877	TKO.DMSO.vs.J1.DMSO	-0.165469	6.82568	2.15357	0.142239	0.301765	FALSE	NoSigChange
Atn1	chr6	124742544	124756487	-	4396	TKO.DMSO.vs.J1.DMSO	-0.268955	2.34526	1.24746	0.264039	0.461787	FALSE	NoSigChange
Atoh1	chr6	64729146	64731235	+	2090	TKO.DMSO.vs.J1.DMSO	0.225119	0.913501	0.118742	0.730403	0.852786	FALSE	NoSigChange
Atox1	chr11	55446643	55461138	-	438	TKO.DMSO.vs.J1.DMSO	0.102234	6.56577	0.797045	0.371978	0.57235	FALSE	NoSigChange
Atp10a	chr7	58658202	58829426	+	5469	TKO.DMSO.vs.J1.DMSO	-0.132335	5.47025	0.894751	0.344193	0.546045	FALSE	NoSigChange
Atp10d	chr5	72203329	72298771	+	6048	TKO.DMSO.vs.J1.DMSO	0.423366	6.19202	11.6566	0.000639765	0.00434367	FALSE	NoSigChange
Atp11a	chr8	12757016	12868728	+	7443	TKO.DMSO.vs.J1.DMSO	0.693283	6.98744	34.9753	3.33912e-09	9.75587e-08	TRUE	SigIncrease
Atp11b	chr3	35754138	35856276	+	4864	TKO.DMSO.vs.J1.DMSO	0.249556	7.75066	2.72023	0.0990838	0.23515	FALSE	NoSigChange
Atp11c	chrX	60223290	60403981	-	6047	TKO.DMSO.vs.J1.DMSO	0.274901	5.98498	4.3156	0.0377645	0.116579	FALSE	NoSigChange
Atp12a	chr14	56365068	56388551	+	3951	TKO.DMSO.vs.J1.DMSO	1.66253	3.45895	19.6276	9.41018e-06	0.000116551	FALSE	NoSigChange
Atp13a1	chr8	69791163	69807748	+	3914	TKO.DMSO.vs.J1.DMSO	-0.0757542	7.27779	0.307615	0.579148	0.751321	FALSE	NoSigChange
Atp13a2	chr4	140986873	141007701	+	4327	TKO.DMSO.vs.J1.DMSO	-0.179023	5.60439	1.50869	0.219339	0.407615	FALSE	NoSigChange
Atp13a3	chr16	30312424	30388530	-	7309	TKO.DMSO.vs.J1.DMSO	-0.0617727	8.38986	0.220481	0.638674	0.793041	FALSE	NoSigChange
Atp13a4	chr16	29396038	29544864	-	4480	TKO.DMSO.vs.J1.DMSO	-0.112319	0.785184	0.0435322	0.834726	0.915235	FALSE	NoSigChange
Atp1a1	chr3	101576219	101604707	-	3702	TKO.DMSO.vs.J1.DMSO	0.0619268	9.49951	0.277748	0.598181	0.764547	FALSE	NoSigChange
Atp1a2	chr1	172271709	172298064	-	6227	TKO.DMSO.vs.J1.DMSO	1.07454	0.162534	2.81976	0.0931101	0.225329	FALSE	NoSigChange
Atp1a3	chr7	24978169	25005895	-	3893	TKO.DMSO.vs.J1.DMSO	0.656923	3.32839	6.29595	0.0121014	0.0483484	FALSE	NoSigChange
Atp1a4	chr1	172223508	172258424	-	3485	TKO.DMSO.vs.J1.DMSO	1.79815	0.601097	17.5196	2.84362e-05	0.000304614	FALSE	NoSigChange
Atp1b1	chr1	164437267	164458355	-	2422	TKO.DMSO.vs.J1.DMSO	0.272185	5.61229	4.90525	0.0267752	0.0899321	FALSE	NoSigChange
Atp1b2	chr11	69599750	69605960	-	2959	TKO.DMSO.vs.J1.DMSO	0.0788904	4.05394	0.0634373	0.801143	0.894554	FALSE	NoSigChange
Atp1b3	chr9	96332675	96364299	-	1831	TKO.DMSO.vs.J1.DMSO	0.0299259	7.00259	0.0763929	0.782246	0.883269	FALSE	NoSigChange
Atp2a2	chr5	122453513	122502225	-	5725	TKO.DMSO.vs.J1.DMSO	0.227559	8.76213	4.20259	0.0403622	0.122438	FALSE	NoSigChange
Atp2a3	chr11	72961169	72993043	+	4606	TKO.DMSO.vs.J1.DMSO	1.46512	3.76388	33.882	5.8559e-09	1.60848e-07	TRUE	SigIncrease
Atp2b1	chr10	98915152	99026143	+	7130	TKO.DMSO.vs.J1.DMSO	0.210832	7.28317	3.64138	0.0563602	0.156554	FALSE	NoSigChange
Atp2b2	chr6	113745668	114042080	-	7218	TKO.DMSO.vs.J1.DMSO	-0.531147	0.451566	0.961945	0.326697	0.527638	FALSE	NoSigChange
Atp2b3	chrX	73503086	73571005	+	4483	TKO.DMSO.vs.J1.DMSO	1.62791	0.675195	11.0241	0.000899357	0.00578859	FALSE	NoSigChange
Atp2b4	chr1	133702674	133753747	-	8292	TKO.DMSO.vs.J1.DMSO	1.28877	5.01578	45.0424	1.92819e-11	8.78768e-10	TRUE	SigIncrease
Atp2c1	chr9	105411362	105521257	-	5266	TKO.DMSO.vs.J1.DMSO	0.00483249	7.37541	0.00218752	0.962696	0.982828	FALSE	NoSigChange
Atp2c2	chr8	119700009	119757718	+	3223	TKO.DMSO.vs.J1.DMSO	-2.59115	0.61839	15.6806	7.499e-05	0.000702028	FALSE	NoSigChange
Atp4a	chr7	30712232	30725534	+	3447	TKO.DMSO.vs.J1.DMSO	0.0767431	2.30904	0.0719226	0.788558	0.886843	FALSE	NoSigChange
Atp5a1	chr18	77773768	77782868	+	2431	TKO.DMSO.vs.J1.DMSO	-0.0205943	10.5135	0.045134	0.831758	0.914052	FALSE	NoSigChange
Atp5b	chr10	128083307	128090388	+	1879	TKO.DMSO.vs.J1.DMSO	0.0775375	10.959	0.613725	0.433389	0.630283	FALSE	NoSigChange
Atp5c1	chr2	10056031	10080510	-	1800	TKO.DMSO.vs.J1.DMSO	0.100988	8.30845	1.03789	0.308312	0.508391	FALSE	NoSigChange
Atp5d	chr10	80142315	80145818	+	931	TKO.DMSO.vs.J1.DMSO	-0.0259708	6.1374	0.0423152	0.83702	0.916148	FALSE	NoSigChange
Atp5e	chr2	174461075	174464101	-	414	TKO.DMSO.vs.J1.DMSO	-0.0560767	5.793	0.23827	0.625458	0.783857	FALSE	NoSigChange
Atp5f1	chr3	105942863	105960248	-	1456	TKO.DMSO.vs.J1.DMSO	0.119078	8.02013	1.21883	0.26959	0.468246	FALSE	NoSigChange
Atp5g1	chr11	96072793	96075694	-	868	TKO.DMSO.vs.J1.DMSO	0.263135	5.0309	2.9832	0.084133	0.209411	FALSE	NoSigChange
Atp5g2	chr15	102662868	102671047	-	647	TKO.DMSO.vs.J1.DMSO	-0.365553	1.92402	1.93508	0.164204	0.33407	FALSE	NoSigChange
Atp5g3	chr2	73908450	73911294	-	679	TKO.DMSO.vs.J1.DMSO	0.103204	7.75425	1.09224	0.295976	0.496238	FALSE	NoSigChange
Atp5h	chr11	115415697	115419919	-	574	TKO.DMSO.vs.J1.DMSO	0.108438	5.79529	0.838709	0.359766	0.561744	FALSE	NoSigChange
Atp5j	chr16	84827871	84835574	-	758	TKO.DMSO.vs.J1.DMSO	0.149651	5.3444	1.22855	0.26769	0.465902	FALSE	NoSigChange
Atp5j2	chr5	145183706	145191592	-	477	TKO.DMSO.vs.J1.DMSO	0.0879394	6.70007	0.519434	0.471083	0.665248	FALSE	NoSigChange
Atp5k	chr5	108433253	108434378	-	292	TKO.DMSO.vs.J1.DMSO	0.0662912	5.50066	0.176216	0.674646	0.818279	FALSE	NoSigChange
Atp5l	chr9	44913248	44920742	-	513	TKO.DMSO.vs.J1.DMSO	0.356735	2.01399	1.25888	0.261863	0.458961	FALSE	NoSigChange
Atp5o	chr16	91925223	91931630	-	772	TKO.DMSO.vs.J1.DMSO	0.0643633	6.93521	0.399454	0.527372	0.711419	FALSE	NoSigChange
Atp5s	chr12	69724962	69744658	+	1485	TKO.DMSO.vs.J1.DMSO	-0.162134	2.68032	0.382282	0.536385	0.719053	FALSE	NoSigChange
Atp5sl	chr7	25619493	25625550	+	2389	TKO.DMSO.vs.J1.DMSO	-0.135821	5.15379	1.02826	0.310567	0.511005	FALSE	NoSigChange
Atp6ap1	chrX	74297097	74304721	+	2189	TKO.DMSO.vs.J1.DMSO	-0.386263	5.74766	9.60821	0.00193709	0.0110685	FALSE	NoSigChange
Atp6ap1l	chr13	90883449	90905355	-	1176	TKO.DMSO.vs.J1.DMSO	2.80535	0.0848155	13.706	0.000213771	0.00172437	FALSE	NoSigChange
Atp6ap2	chrX	12587759	12617051	+	2368	TKO.DMSO.vs.J1.DMSO	0.204417	6.85085	2.36516	0.124071	0.275268	FALSE	NoSigChange
Atp6v0a1	chr11	101009452	101063717	+	4027	TKO.DMSO.vs.J1.DMSO	0.022563	5.22388	0.0211729	0.884309	0.94253	FALSE	NoSigChange
Atp6v0a2	chr5	124712208	124722146	+	1877	TKO.DMSO.vs.J1.DMSO	0.0414679	4.65041	0.0588305	0.808354	0.899668	FALSE	NoSigChange
Atp6v0a4	chr6	38048483	38124586	-	3285	TKO.DMSO.vs.J1.DMSO	1.14705	3.11114	15.8408	6.88995e-05	0.000651826	FALSE	NoSigChange
Atp6v0b	chr4	117884330	117887329	-	996	TKO.DMSO.vs.J1.DMSO	0.21406	6.61471	3.88018	0.0488593	0.140726	FALSE	NoSigChange
Atp6v0d1	chr8	105524470	105566040	-	1617	TKO.DMSO.vs.J1.DMSO	-0.184195	6.70984	2.5616	0.109487	0.251795	FALSE	NoSigChange
Atp6v0e	chr17	26676396	26699646	+	796	TKO.DMSO.vs.J1.DMSO	-0.0628793	6.45805	0.321596	0.57065	0.745846	FALSE	NoSigChange
Atp6v0e2	chr6	48537569	48541800	+	1834	TKO.DMSO.vs.J1.DMSO	-0.134605	3.19377	0.528302	0.467322	0.661604	FALSE	NoSigChange
Atp6v1a	chr16	44085404	44139019	-	3946	TKO.DMSO.vs.J1.DMSO	0.239748	8.60114	4.63556	0.0313158	0.101467	FALSE	NoSigChange
Atp6v1b2	chr8	69088736	69113717	+	2741	TKO.DMSO.vs.J1.DMSO	0.268823	8.33273	7.24453	0.00711174	0.0316882	FALSE	NoSigChange
Atp6v1c1	chr15	38661904	38692444	+	2098	TKO.DMSO.vs.J1.DMSO	-0.00226175	7.16894	0.000299532	0.986192	0.9935	FALSE	NoSigChange
Atp6v1c2	chr12	17284721	17324730	-	1597	TKO.DMSO.vs.J1.DMSO	0.458676	2.73761	1.05157	0.305145	0.505598	FALSE	NoSigChange
Atp6v1d	chr12	78842982	78861638	-	1410	TKO.DMSO.vs.J1.DMSO	0.161383	6.26041	2.02113	0.155123	0.321307	FALSE	NoSigChange
Atp6v1e1	chr6	120795244	120822685	-	1204	TKO.DMSO.vs.J1.DMSO	0.228041	7.40441	5.01682	0.0251022	0.0854248	FALSE	NoSigChange
Atp6v1f	chr6	29467783	29470509	+	635	TKO.DMSO.vs.J1.DMSO	-0.0161342	5.8364	0.0185007	0.891808	0.946349	FALSE	NoSigChange
Atp6v1g1	chr4	63544765	63550701	+	1093	TKO.DMSO.vs.J1.DMSO	-0.134055	5.76331	1.0768	0.299414	0.499822	FALSE	NoSigChange
Atp6v1h	chr1	5083173	5162549	+	1976	TKO.DMSO.vs.J1.DMSO	0.486814	7.40245	14.475	0.000142031	0.0012058	FALSE	NoSigChange
Atp7a	chrX	106027276	106128160	+	8146	TKO.DMSO.vs.J1.DMSO	0.0902215	6.18001	0.509269	0.475455	0.669233	FALSE	NoSigChange
Atp7b	chr8	21994348	22060074	-	4711	TKO.DMSO.vs.J1.DMSO	-0.366299	3.56538	3.39533	0.0653814	0.174419	FALSE	NoSigChange
Atp8a1	chr5	67618141	67847431	-	8248	TKO.DMSO.vs.J1.DMSO	0.51999	5.56997	13.8233	0.000200831	0.00163304	FALSE	NoSigChange
Atp8a2	chr14	59647741	60086834	-	3685	TKO.DMSO.vs.J1.DMSO	-0.375788	2.74205	1.26225	0.261225	0.458107	FALSE	NoSigChange
Atp8b1	chr18	64528979	64661000	-	6440	TKO.DMSO.vs.J1.DMSO	0.851769	3.12092	8.09901	0.00442894	0.0217125	FALSE	NoSigChange
Atp8b2	chr3	89939481	89963332	-	5457	TKO.DMSO.vs.J1.DMSO	0.0685103	6.54361	0.164287	0.68524	0.82489	FALSE	NoSigChange
Atp8b3	chr10	80519585	80539124	-	4411	TKO.DMSO.vs.J1.DMSO	-0.363373	2.11034	1.91417	0.166501	0.337255	FALSE	NoSigChange
Atp8b4	chr2	126320973	126491553	-	5529	TKO.DMSO.vs.J1.DMSO	0.786896	0.818852	2.63567	0.104488	0.24372	FALSE	NoSigChange
Atp8b5	chr4	43267159	43373831	+	4474	TKO.DMSO.vs.J1.DMSO	-0.129749	1.23954	0.136657	0.711627	0.840215	FALSE	NoSigChange
Atp9a	chr2	168634438	168741800	-	3529	TKO.DMSO.vs.J1.DMSO	1.05525	6.00098	51.4541	7.32916e-13	4.14738e-11	TRUE	SigIncrease
Atp9b	chr18	80734141	80934058	-	5432	TKO.DMSO.vs.J1.DMSO	-0.0450385	6.3461	0.172134	0.678222	0.82079	FALSE	NoSigChange
Atpaf1	chr4	115784814	115812314	+	2330	TKO.DMSO.vs.J1.DMSO	0.555324	3.33101	8.23875	0.00410054	0.0204718	FALSE	NoSigChange
Atpaf2	chr11	60400624	60417099	-	1863	TKO.DMSO.vs.J1.DMSO	-0.135164	5.64493	1.07631	0.299525	0.49993	FALSE	NoSigChange
Atpbd4	chr2	114516418	114654928	-	2700	TKO.DMSO.vs.J1.DMSO	-0.198352	5.37069	1.96219	0.161279	0.329971	FALSE	NoSigChange
Atpif1	chr4	132530555	132533659	-	539	TKO.DMSO.vs.J1.DMSO	-0.234177	6.82106	4.68383	0.0304477	0.0992453	FALSE	NoSigChange
Atr	chr9	95857597	95951644	+	8074	TKO.DMSO.vs.J1.DMSO	0.556682	8.23725	10.4514	0.00122558	0.00757135	FALSE	NoSigChange
Atraid	chr5	31048640	31054623	+	961	TKO.DMSO.vs.J1.DMSO	-0.218089	4.49183	2.06538	0.150677	0.314495	FALSE	NoSigChange
Atrip	chr9	109059747	109074124	-	2572	TKO.DMSO.vs.J1.DMSO	-0.173604	5.11582	1.89507	0.168631	0.340033	FALSE	NoSigChange
Atrn	chr2	130906496	131030326	+	8737	TKO.DMSO.vs.J1.DMSO	0.401071	5.95935	7.69269	0.00554451	0.026065	FALSE	NoSigChange
Atrnl1	chr19	57611034	58133340	+	6583	TKO.DMSO.vs.J1.DMSO	0.0154963	4.93439	0.0118746	0.913226	0.957226	FALSE	NoSigChange
Atrx	chrX	105797615	105929372	-	10244	TKO.DMSO.vs.J1.DMSO	-0.237811	8.88595	4.30518	0.0379965	0.117129	FALSE	NoSigChange
Atxn1	chr13	45549756	45964991	-	10607	TKO.DMSO.vs.J1.DMSO	-1.63353	4.10436	65.5907	5.55005e-16	4.82759e-14	TRUE	SigDecrease
Atxn10	chr15	85336381	85463836	+	2425	TKO.DMSO.vs.J1.DMSO	-0.273928	8.47092	5.95882	0.0146438	0.0562131	FALSE	NoSigChange
Atxn1l	chr8	109726451	109737739	-	7526	TKO.DMSO.vs.J1.DMSO	-1.50832	6.64236	137.152	1.11682e-31	3.46944e-29	TRUE	SigDecrease
Atxn2	chr5	121711609	121814950	+	4472	TKO.DMSO.vs.J1.DMSO	0.0992108	5.11156	0.482301	0.487382	0.679389	FALSE	NoSigChange
Atxn2l	chr7	126491708	126503302	-	3718	TKO.DMSO.vs.J1.DMSO	-0.145801	6.42487	0.906035	0.341169	0.543059	FALSE	NoSigChange
Atxn3	chr12	101918901	101958243	-	5404	TKO.DMSO.vs.J1.DMSO	0.236461	6.89268	2.14298	0.143224	0.30318	FALSE	NoSigChange
Atxn7	chr14	14012491	14107301	+	6852	TKO.DMSO.vs.J1.DMSO	0.119335	3.81405	0.469911	0.493028	0.683254	FALSE	NoSigChange
Atxn7l1	chr12	33147686	33368277	+	4278	TKO.DMSO.vs.J1.DMSO	-0.195803	2.4051	0.534366	0.464777	0.659238	FALSE	NoSigChange
Atxn7l2	chr3	108202255	108210934	-	3011	TKO.DMSO.vs.J1.DMSO	-0.462556	2.95613	5.19934	0.0225955	0.0789214	FALSE	NoSigChange
Atxn7l3	chr11	102289300	102296629	-	3707	TKO.DMSO.vs.J1.DMSO	-0.0595053	7.4678	0.356761	0.55031	0.729689	FALSE	NoSigChange
Atxn7l3b	chr10	112925428	112929026	-	3599	TKO.DMSO.vs.J1.DMSO	-0.0871924	7.15293	0.614766	0.432999	0.630065	FALSE	NoSigChange
AU015228	chr2	130100394	130103375	+	2982	TKO.DMSO.vs.J1.DMSO	1.45596	4.86881	3.47162	0.0624303	0.168406	FALSE	NoSigChange
AU015836	chrX	93968656	93975470	+	3000	TKO.DMSO.vs.J1.DMSO	0.377701	7.26334	5.52134	0.0187859	0.0680529	FALSE	NoSigChange
AU018091	chr7	3154659	3169203	-	3448	TKO.DMSO.vs.J1.DMSO	0.750206	7.7668	38.2383	6.26109e-10	2.12263e-08	TRUE	SigIncrease
AU019823	chr9	50605240	50617464	-	3343	TKO.DMSO.vs.J1.DMSO	-0.101158	4.85748	0.463976	0.495772	0.685124	FALSE	NoSigChange
AU019990	chr2	132598196	132653064	+	2494	TKO.DMSO.vs.J1.DMSO	1.33103	1.45756	2.78251	0.0952987	0.228879	FALSE	NoSigChange
AU022252	chr4	119225138	119232724	-	1867	TKO.DMSO.vs.J1.DMSO	0.0260374	4.84054	0.0364731	0.848542	0.923267	FALSE	NoSigChange
AU022751	chrX	6081218	6083420	-	2203	TKO.DMSO.vs.J1.DMSO	3.61324	4.80979	377.338	4.72658e-84	3.5974e-80	TRUE	SigIncrease
AU040320	chr4	126753555	126869694	+	4982	TKO.DMSO.vs.J1.DMSO	-0.117123	4.01501	0.40123	0.526455	0.710686	FALSE	NoSigChange
AU041133	chr10	82128013	82153065	+	2634	TKO.DMSO.vs.J1.DMSO	0.349365	4.13844	4.59388	0.0320863	0.103101	FALSE	NoSigChange
Auh	chr13	52835110	52929677	-	1345	TKO.DMSO.vs.J1.DMSO	0.470755	3.46368	6.21059	0.0126988	0.0502213	FALSE	NoSigChange
Aup1	chr6	83054653	83057682	+	1511	TKO.DMSO.vs.J1.DMSO	-0.218271	4.94546	2.04701	0.152505	0.31757	FALSE	NoSigChange
Aurka	chr2	172356196	172370506	-	1905	TKO.DMSO.vs.J1.DMSO	0.177686	7.37924	2.78615	0.0950823	0.228554	FALSE	NoSigChange
Aurkaip1	chr4	155831269	155833098	+	1209	TKO.DMSO.vs.J1.DMSO	0.00870973	6.44292	0.00560447	0.940324	0.970907	FALSE	NoSigChange
Aurkb	chr11	69045643	69051662	+	1957	TKO.DMSO.vs.J1.DMSO	0.216768	6.40382	3.97622	0.046147	0.135321	FALSE	NoSigChange
Aurkc	chr7	6995385	7003091	+	1438	TKO.DMSO.vs.J1.DMSO	0.724725	0.996828	2.78949	0.0948843	0.228183	FALSE	NoSigChange
Auts2	chr5	131437682	132542343	-	6059	TKO.DMSO.vs.J1.DMSO	-0.759826	2.85402	9.91852	0.00163624	0.00963885	FALSE	NoSigChange
Aven	chr2	112492964	112631253	+	1521	TKO.DMSO.vs.J1.DMSO	0.271664	4.9347	4.18371	0.0408142	0.123489	FALSE	NoSigChange
Avl9	chr6	56714905	56761911	+	6691	TKO.DMSO.vs.J1.DMSO	0.206418	6.62171	3.72275	0.053676	0.151185	FALSE	NoSigChange
Avpi1	chr19	42123275	42128993	-	976	TKO.DMSO.vs.J1.DMSO	0.270365	6.54516	3.45374	0.0631089	0.16983	FALSE	NoSigChange
AW011738	chr4	156203284	156206028	+	2745	TKO.DMSO.vs.J1.DMSO	-1.56493	-0.0998108	5.29456	0.0213921	0.075605	FALSE	NoSigChange
AW146154	chr7	41478874	41499890	-	3411	TKO.DMSO.vs.J1.DMSO	-0.204279	3.68268	0.811161	0.367777	0.569223	FALSE	NoSigChange
AW209491	chr13	14630245	14638202	+	2023	TKO.DMSO.vs.J1.DMSO	-0.196955	4.8273	1.73415	0.187881	0.366657	FALSE	NoSigChange
AW549877	chr15	3982035	3995752	-	5084	TKO.DMSO.vs.J1.DMSO	-0.0876487	6.46465	0.343192	0.557992	0.7359	FALSE	NoSigChange
AW551984	chr9	39587396	39604124	-	4419	TKO.DMSO.vs.J1.DMSO	-0.0802958	3.85314	0.112625	0.737175	0.856838	FALSE	NoSigChange
AW554918	chr18	25169020	25467321	+	5351	TKO.DMSO.vs.J1.DMSO	0.043438	3.83384	0.0649437	0.798846	0.89307	FALSE	NoSigChange
Awat2	chrX	100402222	100412562	-	1593	TKO.DMSO.vs.J1.DMSO	-0.0621599	0.926202	0.0250227	0.874311	0.936659	FALSE	NoSigChange
Axin1	chr17	26138686	26195811	+	3779	TKO.DMSO.vs.J1.DMSO	-0.0813514	6.76118	0.459293	0.497955	0.686707	FALSE	NoSigChange
Axin2	chr11	108920349	108950781	+	4258	TKO.DMSO.vs.J1.DMSO	-0.961392	4.567	19.9404	7.98925e-06	0.000101091	FALSE	NoSigChange
Axl	chr7	25756500	25788733	-	5084	TKO.DMSO.vs.J1.DMSO	-2.98671	4.28833	127.531	1.42153e-29	3.86402e-27	TRUE	SigDecrease
AY358078	chr14	51800046	51826359	+	1461	TKO.DMSO.vs.J1.DMSO	0.391139	2.81065	3.63888	0.056445	0.156704	FALSE	NoSigChange
AY512931	chr8	45060702	45065418	-	2395	TKO.DMSO.vs.J1.DMSO	-0.982217	0.791673	1.83551	0.175478	0.349761	FALSE	NoSigChange
Azi1	chr11	120064430	120086827	-	3578	TKO.DMSO.vs.J1.DMSO	0.354878	4.54087	5.83896	0.0156751	0.059222	FALSE	NoSigChange
Azi2	chr9	118040499	118063907	+	4773	TKO.DMSO.vs.J1.DMSO	-0.0832483	6.19295	0.375887	0.539813	0.722059	FALSE	NoSigChange
Azin1	chr15	38487430	38519266	-	5028	TKO.DMSO.vs.J1.DMSO	-0.160623	8.34975	1.2567	0.262277	0.459528	FALSE	NoSigChange
B020004J07Rik	chr4	101834969	101844022	-	1975	TKO.DMSO.vs.J1.DMSO	0.459249	2.35558	0.314744	0.574784	0.748567	FALSE	NoSigChange
B130006D01Rik	chr11	95723586	95726773	+	3188	TKO.DMSO.vs.J1.DMSO	0.357417	2.47218	1.08057	0.298571	0.498637	FALSE	NoSigChange
B230118H07Rik	chr2	101560781	101628986	-	2269	TKO.DMSO.vs.J1.DMSO	-0.0266106	4.42487	0.0303929	0.861602	0.929915	FALSE	NoSigChange
B230120H23Rik	chr2	72285637	72442610	+	9110	TKO.DMSO.vs.J1.DMSO	-0.289125	5.88047	2.90387	0.0883673	0.217026	FALSE	NoSigChange
B230208H11Rik	chr10	12916646	12923127	-	1182	TKO.DMSO.vs.J1.DMSO	-0.796418	0.626273	4.94842	0.0261146	0.0881514	FALSE	NoSigChange
B230216G23Rik	chr6	142413431	142419740	+	1536	TKO.DMSO.vs.J1.DMSO	0.247814	0.0246585	0.158912	0.69016	0.827997	FALSE	NoSigChange
B230217C12Rik	chr11	97840780	97843043	+	1189	TKO.DMSO.vs.J1.DMSO	-0.170955	2.49511	0.577634	0.447241	0.642619	FALSE	NoSigChange
B230217O12Rik	chr19	57323197	57360899	-	1954	TKO.DMSO.vs.J1.DMSO	-0.715906	0.477289	3.36979	0.0664022	0.176456	FALSE	NoSigChange
B230219D22Rik	chr13	55693124	55703500	+	4652	TKO.DMSO.vs.J1.DMSO	-0.159793	6.94983	2.26369	0.132438	0.287882	FALSE	NoSigChange
B2m	chr2	122147687	122153082	+	858	TKO.DMSO.vs.J1.DMSO	-0.195069	4.88525	1.0179	0.313019	0.513058	FALSE	NoSigChange
B330016D10Rik	chr4	141546162	141548313	+	2152	TKO.DMSO.vs.J1.DMSO	-0.0739237	0.893698	0.0457639	0.830606	0.91348	FALSE	NoSigChange
B3galnt1	chr3	69574186	69598861	-	1901	TKO.DMSO.vs.J1.DMSO	0.452824	4.03736	7.96687	0.00476412	0.0230367	FALSE	NoSigChange
B3galnt2	chr13	13954674	13999068	+	3681	TKO.DMSO.vs.J1.DMSO	0.0482768	5.75303	0.168407	0.681531	0.822963	FALSE	NoSigChange
B3galt1	chr2	68104672	68122882	+	5222	TKO.DMSO.vs.J1.DMSO	0.290226	0.717195	0.478043	0.48931	0.680581	FALSE	NoSigChange
B3galt4	chr17	33949912	33951488	-	1577	TKO.DMSO.vs.J1.DMSO	-0.0430256	2.71941	0.0345749	0.852489	0.925247	FALSE	NoSigChange
B3galt5	chr16	96235801	96319858	+	5328	TKO.DMSO.vs.J1.DMSO	-1.32622	-0.198593	1.48972	0.22226	0.41118	FALSE	NoSigChange
B3galt6	chr4	155989466	155992678	-	3213	TKO.DMSO.vs.J1.DMSO	-0.124964	4.48186	0.611253	0.434317	0.631318	FALSE	NoSigChange
B3galtl	chr5	149678257	149762599	+	4543	TKO.DMSO.vs.J1.DMSO	0.155008	3.93877	0.629748	0.427448	0.625395	FALSE	NoSigChange
B3gat1	chr9	26751562	26761338	+	3426	TKO.DMSO.vs.J1.DMSO	1.0532	0.829006	5.48927	0.0191335	0.0690166	FALSE	NoSigChange
B3gat3	chr19	8920393	8927236	+	1584	TKO.DMSO.vs.J1.DMSO	-0.237234	4.49628	1.39165	0.238127	0.430649	FALSE	NoSigChange
B3gnt1	chr19	5038826	5041134	+	2035	TKO.DMSO.vs.J1.DMSO	-0.244062	4.27613	2.52262	0.112224	0.256036	FALSE	NoSigChange
B3gnt2	chr11	22834739	22860336	-	2818	TKO.DMSO.vs.J1.DMSO	0.149686	6.18768	1.04665	0.30628	0.506798	FALSE	NoSigChange
B3gnt3	chr8	71691720	71701800	-	2102	TKO.DMSO.vs.J1.DMSO	0.773076	0.963062	3.84201	0.0499837	0.143098	FALSE	NoSigChange
B3gnt4	chr5	123510460	123511882	+	1423	TKO.DMSO.vs.J1.DMSO	0.457846	0.869339	1.15065	0.283414	0.483972	FALSE	NoSigChange
B3gnt5	chr16	19760234	19772753	+	4872	TKO.DMSO.vs.J1.DMSO	-0.129724	6.17754	0.59477	0.440581	0.636957	FALSE	NoSigChange
B3gnt7	chr1	86303221	86307305	+	2595	TKO.DMSO.vs.J1.DMSO	-0.255096	6.9008	3.49335	0.0616158	0.166889	FALSE	NoSigChange
B3gnt8	chr7	25627624	25629490	+	1867	TKO.DMSO.vs.J1.DMSO	0.0286468	0.0412457	0.00358403	0.952262	0.977367	FALSE	NoSigChange
B3gnt9	chr8	105252638	105255153	-	2516	TKO.DMSO.vs.J1.DMSO	-0.320409	0.913228	0.873357	0.350028	0.552137	FALSE	NoSigChange
B3gntl1	chr11	121616208	121673151	-	2851	TKO.DMSO.vs.J1.DMSO	-0.0214006	4.69195	0.0187306	0.891142	0.946084	FALSE	NoSigChange
B430319G15Rik	chr9	92538801	92542869	-	4069	TKO.DMSO.vs.J1.DMSO	0.640687	1.79195	3.53433	0.0601106	0.164038	FALSE	NoSigChange
B4galnt1	chr10	127165156	127172340	+	3289	TKO.DMSO.vs.J1.DMSO	0.105251	2.85196	0.210892	0.646069	0.797878	FALSE	NoSigChange
B4galnt2	chr11	95863559	95914871	-	4086	TKO.DMSO.vs.J1.DMSO	-0.117191	1.51905	0.0554837	0.813782	0.902995	FALSE	NoSigChange
B4galnt3	chr6	120203810	120294559	-	2961	TKO.DMSO.vs.J1.DMSO	0.411295	5.49247	10.2478	0.00136851	0.00831596	FALSE	NoSigChange
B4galnt4	chr7	141061274	141072119	+	3105	TKO.DMSO.vs.J1.DMSO	0.450632	5.31146	8.6774	0.00322181	0.0168126	FALSE	NoSigChange
B4galt1	chr4	40804582	40854537	-	4535	TKO.DMSO.vs.J1.DMSO	0.1509	6.3248	1.71878	0.18985	0.368647	FALSE	NoSigChange
B4galt2	chr4	117873000	117883476	-	2522	TKO.DMSO.vs.J1.DMSO	-0.699521	3.88534	10.179	0.00142048	0.00859059	FALSE	NoSigChange
B4galt3	chr1	171270328	171276895	+	1998	TKO.DMSO.vs.J1.DMSO	-0.333121	4.79494	5.07655	0.0242515	0.0832184	FALSE	NoSigChange
B4galt4	chr16	38742264	38769045	+	2300	TKO.DMSO.vs.J1.DMSO	-1.17673	4.16854	39.949	2.60681e-10	9.33667e-09	TRUE	SigDecrease
B4galt5	chr2	167298445	167349178	-	4204	TKO.DMSO.vs.J1.DMSO	0.543642	6.33536	18.1872	2.00223e-05	0.000226159	FALSE	NoSigChange
B4galt6	chr18	20684599	20746404	-	5808	TKO.DMSO.vs.J1.DMSO	0.131024	7.33666	1.04615	0.306396	0.506841	FALSE	NoSigChange
B4galt7	chr13	55600111	55609954	+	1596	TKO.DMSO.vs.J1.DMSO	-0.156527	3.59096	0.799118	0.371357	0.571741	FALSE	NoSigChange
B630005N14Rik	chr6	13625675	13677966	-	4141	TKO.DMSO.vs.J1.DMSO	-0.0997183	6.53437	0.420487	0.516694	0.702725	FALSE	NoSigChange
B630019K06Rik	chrX	8892353	8894964	+	2612	TKO.DMSO.vs.J1.DMSO	0.847425	0.807955	3.57261	0.0587398	0.161193	FALSE	NoSigChange
B930003M22Rik	chr17	10319919	10321141	+	1223	TKO.DMSO.vs.J1.DMSO	0.639724	0.885155	3.4074	0.0649047	0.173505	FALSE	NoSigChange
B930041F14Rik	chr4	155694342	155696483	+	2142	TKO.DMSO.vs.J1.DMSO	1.00859	3.94397	28.4555	9.58762e-08	1.95111e-06	TRUE	SigIncrease
B930059L03Rik	chr12	110591374	110592679	+	1306	TKO.DMSO.vs.J1.DMSO	0.415926	0.867238	1.22005	0.26935	0.467989	FALSE	NoSigChange
B930092H01Rik	chr9	61259227	61293809	-	2678	TKO.DMSO.vs.J1.DMSO	0.0227347	-0.416245	0.00108236	0.973755	0.987847	FALSE	NoSigChange
B9d1	chr11	61505172	61512927	+	785	TKO.DMSO.vs.J1.DMSO	-0.0842748	4.96141	0.352589	0.552651	0.7312	FALSE	NoSigChange
B9d2	chr7	25681158	25686558	+	1021	TKO.DMSO.vs.J1.DMSO	0.0259563	0.881906	0.00528328	0.942056	0.972004	FALSE	NoSigChange
Babam1	chr8	71396855	71404772	+	1592	TKO.DMSO.vs.J1.DMSO	-0.401528	5.71687	5.94255	0.0147796	0.0565975	FALSE	NoSigChange
Bace1	chr9	45838529	45862484	+	4194	TKO.DMSO.vs.J1.DMSO	0.00569183	4.2609	0.000862412	0.976572	0.989508	FALSE	NoSigChange
Bace2	chr16	97356728	97439012	+	3736	TKO.DMSO.vs.J1.DMSO	1.99295	-0.270282	2.35597	0.124805	0.276411	FALSE	NoSigChange
Bach1	chr16	87698954	87733346	+	5858	TKO.DMSO.vs.J1.DMSO	-0.251563	6.31058	4.29444	0.0382372	0.117646	FALSE	NoSigChange
Bach2	chr4	32417435	32586108	+	8493	TKO.DMSO.vs.J1.DMSO	-2.26697	2.39894	57.4702	3.43132e-14	2.37416e-12	TRUE	SigDecrease
Bad	chr19	6941855	6951893	+	1452	TKO.DMSO.vs.J1.DMSO	0.134129	4.0866	0.436534	0.5088	0.696247	FALSE	NoSigChange
Bag1	chr4	40936398	40948294	-	1349	TKO.DMSO.vs.J1.DMSO	-0.0637802	7.05063	0.339523	0.560105	0.737791	FALSE	NoSigChange
Bag2	chr1	33745484	33757750	-	1815	TKO.DMSO.vs.J1.DMSO	-1.24362	2.87322	27.117	1.91506e-07	3.65158e-06	TRUE	SigDecrease
Bag3	chr7	128523583	128546979	+	2593	TKO.DMSO.vs.J1.DMSO	0.262957	4.66439	3.00553	0.0829809	0.207173	FALSE	NoSigChange
Bag4	chr8	25764539	25785209	-	4797	TKO.DMSO.vs.J1.DMSO	0.237604	7.67839	2.91394	0.0878169	0.216178	FALSE	NoSigChange
Bag5	chr12	111709490	111713256	-	2136	TKO.DMSO.vs.J1.DMSO	0.0806886	4.57607	0.215894	0.642186	0.795133	FALSE	NoSigChange
Bag6	chr17	35135178	35147322	+	4066	TKO.DMSO.vs.J1.DMSO	-0.227871	7.1791	4.37245	0.0365245	0.113511	FALSE	NoSigChange
Bahcc1	chr11	120232947	120292297	+	10727	TKO.DMSO.vs.J1.DMSO	0.744598	4.46362	21.6515	3.26953e-06	4.56595e-05	FALSE	NoSigChange
Bahd1	chr2	118901615	118924524	+	4428	TKO.DMSO.vs.J1.DMSO	0.739122	4.00145	8.24628	0.00408356	0.0204205	FALSE	NoSigChange
Bai1	chr15	74516196	74589464	+	6227	TKO.DMSO.vs.J1.DMSO	0.432428	2.9741	4.64768	0.0310955	0.10086	FALSE	NoSigChange
Bai2	chr4	129985078	130022633	+	5289	TKO.DMSO.vs.J1.DMSO	0.0126724	4.1937	0.00370241	0.951481	0.977049	FALSE	NoSigChange
Bai3	chr1	25067476	25829707	-	5522	TKO.DMSO.vs.J1.DMSO	0.495973	1.43207	1.46507	0.226125	0.415609	FALSE	NoSigChange
Baiap2	chr11	119943092	120006782	+	3610	TKO.DMSO.vs.J1.DMSO	0.396922	5.9024	6.98449	0.00822192	0.0355691	FALSE	NoSigChange
Baiap2l1	chr5	144264525	144358112	-	3248	TKO.DMSO.vs.J1.DMSO	-0.766774	1.7195	3.31853	0.0685031	0.180739	FALSE	NoSigChange
Baiap2l2	chr15	79258195	79285509	-	2072	TKO.DMSO.vs.J1.DMSO	0.882366	0.71421	3.46801	0.0625667	0.168654	FALSE	NoSigChange
Baiap3	chr17	25242659	25256364	-	4645	TKO.DMSO.vs.J1.DMSO	0.968126	2.54351	5.746	0.0165263	0.0616123	FALSE	NoSigChange
Bak1	chr17	27019812	27028626	-	2002	TKO.DMSO.vs.J1.DMSO	-0.31263	5.82482	5.81643	0.0158771	0.0598221	FALSE	NoSigChange
Bambi	chr18	3507957	3516404	+	5040	TKO.DMSO.vs.J1.DMSO	-0.184097	4.94266	1.3433	0.246453	0.441042	FALSE	NoSigChange
Bambi-ps1	chr2	122466583	122467797	-	1215	TKO.DMSO.vs.J1.DMSO	-0.291304	0.689016	0.241311	0.623261	0.782271	FALSE	NoSigChange
Banf1	chr19	5364640	5366645	-	821	TKO.DMSO.vs.J1.DMSO	-0.114195	6.27457	1.01217	0.314384	0.514575	FALSE	NoSigChange
Banp	chr8	121950533	122029258	+	5455	TKO.DMSO.vs.J1.DMSO	-0.273539	5.57148	3.58207	0.0584064	0.160684	FALSE	NoSigChange
Bap1	chr14	31251489	31259929	+	3406	TKO.DMSO.vs.J1.DMSO	-0.203209	7.29246	2.76125	0.0965729	0.231065	FALSE	NoSigChange
Bard1	chr1	71027535	71102972	-	5448	TKO.DMSO.vs.J1.DMSO	0.0344424	6.25661	0.0911508	0.762719	0.87174	FALSE	NoSigChange
Barx1	chr13	48663036	48666507	+	1361	TKO.DMSO.vs.J1.DMSO	1.28196	1.5267	5.8408	0.0156587	0.059175	FALSE	NoSigChange
Barx2	chr9	31846044	31913285	-	1791	TKO.DMSO.vs.J1.DMSO	0.74614	1.30669	2.10564	0.146757	0.30864	FALSE	NoSigChange
Basp1	chr15	25363277	25413764	-	1855	TKO.DMSO.vs.J1.DMSO	-0.37525	7.04089	4.80197	0.0284271	0.0940487	FALSE	NoSigChange
Batf3	chr1	191098414	191108943	+	712	TKO.DMSO.vs.J1.DMSO	-0.0995876	1.10339	0.0517358	0.82007	0.907466	FALSE	NoSigChange
Bax	chr7	45461695	45466898	-	869	TKO.DMSO.vs.J1.DMSO	0.192404	7.39742	2.24434	0.134104	0.290086	FALSE	NoSigChange
Baz1a	chr12	54892989	54986336	-	6179	TKO.DMSO.vs.J1.DMSO	-0.0137833	6.62711	0.00933378	0.923035	0.961108	FALSE	NoSigChange
Baz1b	chr5	135187323	135246129	+	6433	TKO.DMSO.vs.J1.DMSO	-0.167262	7.72593	2.61018	0.106179	0.246419	FALSE	NoSigChange
Baz2a	chr10	128092783	128129303	+	8369	TKO.DMSO.vs.J1.DMSO	0.118432	7.43854	1.1729	0.278807	0.47879	FALSE	NoSigChange
Baz2b	chr2	59899363	60125740	-	7980	TKO.DMSO.vs.J1.DMSO	-0.515925	4.80125	13.7759	0.000205963	0.00166676	FALSE	NoSigChange
BB287469	chr12	87618868	87820676	+	3702	TKO.DMSO.vs.J1.DMSO	1.29803	1.14602	0.871732	0.350476	0.552616	FALSE	NoSigChange
Bbc3	chr7	16309583	16318334	+	1976	TKO.DMSO.vs.J1.DMSO	-0.26626	4.68816	3.71935	0.0537854	0.151419	FALSE	NoSigChange
Bbip1	chr19	53929659	53944627	-	2506	TKO.DMSO.vs.J1.DMSO	-0.180411	3.92185	0.828158	0.362806	0.564434	FALSE	NoSigChange
Bbs1	chr19	4886882	4906627	-	5597	TKO.DMSO.vs.J1.DMSO	-0.115375	2.98076	0.192642	0.660727	0.808475	FALSE	NoSigChange
Bbs10	chr10	111298679	111301736	+	2753	TKO.DMSO.vs.J1.DMSO	-0.0735365	4.13492	0.114456	0.735128	0.85587	FALSE	NoSigChange
Bbs12	chr3	37312554	37321451	+	2434	TKO.DMSO.vs.J1.DMSO	-0.486675	3.37379	6.38449	0.0115122	0.0464948	FALSE	NoSigChange
Bbs2	chr8	94067954	94098811	-	2947	TKO.DMSO.vs.J1.DMSO	-0.277958	4.8416	3.29001	0.0697028	0.18265	FALSE	NoSigChange
Bbs4	chr9	59321966	59353508	-	2542	TKO.DMSO.vs.J1.DMSO	-0.069387	4.43146	0.179511	0.671794	0.815995	FALSE	NoSigChange
Bbs5	chr2	69647255	69667569	+	1419	TKO.DMSO.vs.J1.DMSO	-0.176491	3.79122	0.924272	0.336356	0.538438	FALSE	NoSigChange
Bbs7	chr3	36573143	36613389	-	2598	TKO.DMSO.vs.J1.DMSO	-0.173597	3.5434	0.631074	0.426962	0.624901	FALSE	NoSigChange
Bbs9	chr9	22475715	22888280	+	3438	TKO.DMSO.vs.J1.DMSO	0.429027	5.38865	9.18021	0.00244646	0.0134729	FALSE	NoSigChange
Bbx	chr16	50191844	50432389	-	8742	TKO.DMSO.vs.J1.DMSO	-0.171589	8.11312	1.94025	0.163641	0.333411	FALSE	NoSigChange
BC002163	chr16	42955580	123718161	+	984	TKO.DMSO.vs.J1.DMSO	0.139945	5.26713	0.997239	0.317979	0.518943	FALSE	NoSigChange
BC003331	chr1	150361311	150393055	-	3242	TKO.DMSO.vs.J1.DMSO	-0.154883	5.60956	0.84097	0.359119	0.561061	FALSE	NoSigChange
BC003965	chr17	25184561	25187662	+	3023	TKO.DMSO.vs.J1.DMSO	0.42539	5.91249	13.9436	0.000188383	0.00154502	FALSE	NoSigChange
BC004004	chr17	29268788	29302887	+	2809	TKO.DMSO.vs.J1.DMSO	-0.0165033	5.64554	0.0154434	0.9011	0.95069	FALSE	NoSigChange
BC005537	chr13	24801657	24812899	+	2551	TKO.DMSO.vs.J1.DMSO	0.00472935	6.14334	0.00141645	0.969978	0.986175	FALSE	NoSigChange
BC005561	chr5	104508352	104522383	+	5181	TKO.DMSO.vs.J1.DMSO	-0.123728	4.76818	0.776074	0.378345	0.578113	FALSE	NoSigChange
BC005624	chr2	30972833	30981941	-	1328	TKO.DMSO.vs.J1.DMSO	-0.239684	4.52206	2.61965	0.105548	0.245289	FALSE	NoSigChange
BC005764	chr10	79860475	79874634	-	4275	TKO.DMSO.vs.J1.DMSO	0.854788	2.21846	7.59794	0.00584351	0.0271023	FALSE	NoSigChange
BC016423	chr13	3566035	3611108	-	8338	TKO.DMSO.vs.J1.DMSO	-0.364603	8.61763	11.4487	0.000715454	0.00476198	FALSE	NoSigChange
BC017158	chr7	128271379	128298131	-	2588	TKO.DMSO.vs.J1.DMSO	-0.0284617	2.82341	0.01399	0.905846	0.952989	FALSE	NoSigChange
BC017612	chr9	15505495	15545259	+	945	TKO.DMSO.vs.J1.DMSO	-0.321648	2.87995	1.71183	0.190748	0.369791	FALSE	NoSigChange
BC017643	chr11	121222589	121229309	-	2590	TKO.DMSO.vs.J1.DMSO	-0.0997812	4.78255	0.555038	0.456266	0.651711	FALSE	NoSigChange
BC018242	chr9	21938274	21948907	+	2608	TKO.DMSO.vs.J1.DMSO	-0.506285	1.00053	1.65609	0.198133	0.379607	FALSE	NoSigChange
BC018507	chr13	70588689	70637634	-	7675	TKO.DMSO.vs.J1.DMSO	-0.154001	7.06523	1.9104	0.166919	0.337697	FALSE	NoSigChange
BC020402	chr10	7678971	7681158	-	2188	TKO.DMSO.vs.J1.DMSO	-0.0445038	1.37367	0.0151993	0.901881	0.951135	FALSE	NoSigChange
BC021614	chr19	4057487	4059294	-	675	TKO.DMSO.vs.J1.DMSO	1.49808	1.46517	15.3701	8.83772e-05	0.000807005	FALSE	NoSigChange
BC021767	chr3	94660589	94667152	-	2228	TKO.DMSO.vs.J1.DMSO	-1.02095	1.65777	8.88047	0.00288238	0.0153817	FALSE	NoSigChange
BC021891	chr8	125910450	125947439	+	5692	TKO.DMSO.vs.J1.DMSO	-0.99196	1.5709	6.09436	0.0135614	0.0529721	FALSE	NoSigChange
BC022687	chr12	112808975	112816245	+	1915	TKO.DMSO.vs.J1.DMSO	-0.540278	3.15168	5.67055	0.017252	0.0635398	FALSE	NoSigChange
BC023829	chrX	70460056	70477043	-	1989	TKO.DMSO.vs.J1.DMSO	-0.28489	4.36964	3.0538	0.0805484	0.202597	FALSE	NoSigChange
BC024978	chr7	27195781	27204320	+	1748	TKO.DMSO.vs.J1.DMSO	0.260629	2.0485	0.867578	0.351627	0.553684	FALSE	NoSigChange
BC025920	chr10	81606308	81609836	+	1890	TKO.DMSO.vs.J1.DMSO	-0.966629	0.746828	7.20631	0.00726475	0.0322403	FALSE	NoSigChange
BC026585	chr1	157458582	157488733	+	1289	TKO.DMSO.vs.J1.DMSO	0.302027	3.58544	1.59654	0.206394	0.391201	FALSE	NoSigChange
BC026590	chr4	56802329	56809605	+	4299	TKO.DMSO.vs.J1.DMSO	0.0798902	3.43016	0.178084	0.673025	0.817167	FALSE	NoSigChange
BC027231	chr16	44724301	44737284	+	2866	TKO.DMSO.vs.J1.DMSO	-0.00748722	6.24431	0.00436935	0.947297	0.974355	FALSE	NoSigChange
BC028528	chr3	95884973	95891930	-	447	TKO.DMSO.vs.J1.DMSO	0.475895	0.812908	1.25233	0.263107	0.460506	FALSE	NoSigChange
BC029214	chr2	25459488	25461094	-	975	TKO.DMSO.vs.J1.DMSO	-0.251043	1.00026	0.517615	0.471861	0.665831	FALSE	NoSigChange
BC029722	chr2	155817732	155819203	-	1390	TKO.DMSO.vs.J1.DMSO	-0.739243	3.15477	11.7618	0.000604574	0.00415962	FALSE	NoSigChange
BC030307	chr10	86705811	86776843	+	5031	TKO.DMSO.vs.J1.DMSO	-0.39556	1.43262	0.92031	0.337394	0.539192	FALSE	NoSigChange
BC030336	chr7	120677620	120734854	+	4842	TKO.DMSO.vs.J1.DMSO	-0.126145	5.26184	0.870938	0.350696	0.552847	FALSE	NoSigChange
BC030476	chr15	34453312	34473892	+	2376	TKO.DMSO.vs.J1.DMSO	0.12085	1.06818	0.0959698	0.756721	0.86877	FALSE	NoSigChange
BC030867	chr11	102248882	102265183	+	2543	TKO.DMSO.vs.J1.DMSO	-0.0595691	4.96934	0.161835	0.687473	0.825944	FALSE	NoSigChange
BC031181	chr18	75005900	75009933	+	1047	TKO.DMSO.vs.J1.DMSO	0.0199111	5.73072	0.0249919	0.874387	0.936659	FALSE	NoSigChange
BC031361	chr16	38085064	38089260	-	4197	TKO.DMSO.vs.J1.DMSO	0.0870111	1.16597	0.0677206	0.794685	0.89051	FALSE	NoSigChange
BC033916	chr17	33905135	33906675	+	807	TKO.DMSO.vs.J1.DMSO	0.140856	3.13454	0.289641	0.590451	0.759493	FALSE	NoSigChange
BC037034	chr5	138259658	138264052	-	2546	TKO.DMSO.vs.J1.DMSO	-0.254135	3.46916	1.32076	0.250456	0.445597	FALSE	NoSigChange
BC037704	chr19	43675178	43677170	+	1993	TKO.DMSO.vs.J1.DMSO	0.0387878	1.48848	0.0107079	0.917583	0.958795	FALSE	NoSigChange
BC048403	chr10	121739937	121752859	+	3117	TKO.DMSO.vs.J1.DMSO	0.0752737	3.38713	0.163453	0.685997	0.8254	FALSE	NoSigChange
BC048507	chr13	67863326	67863923	+	598	TKO.DMSO.vs.J1.DMSO	-0.00457364	0.841282	0.000137823	0.990633	0.995407	FALSE	NoSigChange
BC049762	chr11	51253651	51262951	-	883	TKO.DMSO.vs.J1.DMSO	2.6405	-0.0340813	12.6909	0.000367443	0.00273507	FALSE	NoSigChange
BC051019	chr7	109712181	109723771	-	1942	TKO.DMSO.vs.J1.DMSO	0.601474	4.49206	3.97639	0.0461423	0.135321	FALSE	NoSigChange
BC051142	chr17	34398820	34460734	+	1969	TKO.DMSO.vs.J1.DMSO	-2.54825	0.129503	8.00607	0.00466209	0.0226512	FALSE	NoSigChange
BC051226	chr17	33908182	33909178	-	840	TKO.DMSO.vs.J1.DMSO	-0.246603	2.61389	1.1055	0.293061	0.493407	FALSE	NoSigChange
BC052040	chr2	115581716	115778768	+	2770	TKO.DMSO.vs.J1.DMSO	-0.00751285	4.81118	0.00181168	0.966049	0.984671	FALSE	NoSigChange
BC053749	chr7	30539134	30552272	-	2466	TKO.DMSO.vs.J1.DMSO	-0.315973	2.42136	1.92934	0.164831	0.334954	FALSE	NoSigChange
BC055111	chr4	106590909	106617238	-	1970	TKO.DMSO.vs.J1.DMSO	-0.125145	1.62219	0.103437	0.747744	0.863379	FALSE	NoSigChange
BC055324	chr1	163954008	163994781	-	2910	TKO.DMSO.vs.J1.DMSO	0.219339	7.77318	4.12558	0.0422397	0.127	FALSE	NoSigChange
BC056474	chr8	85080963	85082339	+	699	TKO.DMSO.vs.J1.DMSO	-0.202159	3.36234	1.10015	0.294234	0.494406	FALSE	NoSigChange
BC065397	chrX	136742957	136803361	+	3226	TKO.DMSO.vs.J1.DMSO	-0.359286	2.91831	2.82489	0.0928133	0.225076	FALSE	NoSigChange
BC068157	chr8	4209543	4217312	-	4616	TKO.DMSO.vs.J1.DMSO	-0.737867	0.230074	1.421	0.233239	0.424379	FALSE	NoSigChange
BC068281	chr12	4843303	4856967	+	3173	TKO.DMSO.vs.J1.DMSO	-0.398769	3.69484	4.00378	0.0453983	0.133744	FALSE	NoSigChange
BC080695	chr4	143567467	143573798	+	2103	TKO.DMSO.vs.J1.DMSO	1.3808	1.04681	1.57149	0.20999	0.395554	FALSE	NoSigChange
BC096441	chr11	69682577	69696098	-	2235	TKO.DMSO.vs.J1.DMSO	1.7621	-0.79533	11.1903	0.000822241	0.00535107	FALSE	NoSigChange
BC125332	chr2	112247948	112259291	-	3731	TKO.DMSO.vs.J1.DMSO	2.42439	1.54372	15.1978	9.68173e-05	0.00087567	FALSE	NoSigChange
BC147527	chr13	120300392	120308841	+	1657	TKO.DMSO.vs.J1.DMSO	0.288131	2.41103	0.23033	0.631279	0.787973	FALSE	NoSigChange
Bcam	chr7	19756138	19770532	-	2407	TKO.DMSO.vs.J1.DMSO	-0.83793	7.12988	8.51833	0.00351587	0.0180477	FALSE	NoSigChange
Bcan	chr3	87987531	88000356	-	3808	TKO.DMSO.vs.J1.DMSO	0.661741	1.33795	3.52796	0.0603419	0.164386	FALSE	NoSigChange
Bcap29	chr12	31595354	31634658	-	2008	TKO.DMSO.vs.J1.DMSO	0.865957	4.52894	27.9502	1.24481e-07	2.46725e-06	TRUE	SigIncrease
Bcap31	chrX	73686183	73716175	-	1214	TKO.DMSO.vs.J1.DMSO	-0.0313282	6.96922	0.0706552	0.790385	0.887485	FALSE	NoSigChange
Bcar1	chr8	111710475	111743849	-	3279	TKO.DMSO.vs.J1.DMSO	-1.18703	6.64153	40.9545	1.55813e-10	5.81319e-09	TRUE	SigDecrease
Bcar3	chr3	122419780	122530182	+	3300	TKO.DMSO.vs.J1.DMSO	0.0160777	4.89837	0.00698663	0.933386	0.966575	FALSE	NoSigChange
Bcas1	chr2	170346991	170427845	-	3090	TKO.DMSO.vs.J1.DMSO	-0.174139	2.18912	0.168204	0.681713	0.823117	FALSE	NoSigChange
Bcas2	chr3	103171711	103179154	+	1413	TKO.DMSO.vs.J1.DMSO	-0.152547	7.01554	1.66535	0.196883	0.378227	FALSE	NoSigChange
Bcas3	chr11	85353164	85826058	+	3656	TKO.DMSO.vs.J1.DMSO	0.528476	6.14816	16.9437	3.85054e-05	0.000394434	FALSE	NoSigChange
Bcat1	chr6	144993835	145076157	-	8102	TKO.DMSO.vs.J1.DMSO	-0.208971	8.57104	3.94434	0.0470294	0.137116	FALSE	NoSigChange
Bcat2	chr7	45570153	45589710	+	2204	TKO.DMSO.vs.J1.DMSO	-0.0248744	6.13845	0.0211253	0.884438	0.942543	FALSE	NoSigChange
Bccip	chr7	133709333	133721145	+	1244	TKO.DMSO.vs.J1.DMSO	-0.156006	6.04308	1.58316	0.208306	0.39331	FALSE	NoSigChange
Bcdin3d	chr15	99470084	99474730	-	1271	TKO.DMSO.vs.J1.DMSO	-0.288532	3.79659	2.85974	0.0908223	0.221661	FALSE	NoSigChange
Bche	chr3	73635809	73708415	-	6209	TKO.DMSO.vs.J1.DMSO	0.127207	5.36733	0.487167	0.485194	0.678015	FALSE	NoSigChange
Bckdha	chr7	25629852	25658761	-	1773	TKO.DMSO.vs.J1.DMSO	0.235328	6.40299	3.61435	0.0572831	0.158337	FALSE	NoSigChange
Bckdhb	chr9	83948781	84124240	+	1398	TKO.DMSO.vs.J1.DMSO	0.29447	5.46228	5.65579	0.0173978	0.0639995	FALSE	NoSigChange
Bckdk	chr7	127904073	127909664	+	2857	TKO.DMSO.vs.J1.DMSO	-0.312393	6.63165	6.00853	0.0142369	0.0549617	FALSE	NoSigChange
Bcl10	chr3	145924378	145934283	+	1760	TKO.DMSO.vs.J1.DMSO	-0.346666	5.75818	8.34431	0.00386897	0.01954	FALSE	NoSigChange
Bcl11a	chr11	24078056	24173558	+	7017	TKO.DMSO.vs.J1.DMSO	-0.0433029	1.37846	0.0132673	0.908299	0.954331	FALSE	NoSigChange
Bcl11b	chr12	107910403	108003414	-	7923	TKO.DMSO.vs.J1.DMSO	-1.03031	1.14425	7.36023	0.00666822	0.0300841	FALSE	NoSigChange
Bcl2	chr1	106538179	106714290	-	7737	TKO.DMSO.vs.J1.DMSO	-1.43086	1.85345	13.3209	0.000262461	0.00206256	FALSE	NoSigChange
Bcl2l1	chr2	152780668	152831682	-	2371	TKO.DMSO.vs.J1.DMSO	-0.343391	6.54229	3.33222	0.0679352	0.179564	FALSE	NoSigChange
Bcl2l11	chr2	128126038	128162547	+	5037	TKO.DMSO.vs.J1.DMSO	-0.682804	6.34466	31.6943	1.80455e-08	4.36013e-07	TRUE	SigDecrease
Bcl2l12	chr7	44991222	44997579	-	1075	TKO.DMSO.vs.J1.DMSO	-0.321171	3.37433	2.92296	0.0873274	0.215445	FALSE	NoSigChange
Bcl2l13	chr6	120836230	120892842	+	6933	TKO.DMSO.vs.J1.DMSO	-0.311302	6.31297	7.22377	0.00719445	0.031963	FALSE	NoSigChange
Bcl2l14	chr6	134396329	134438724	+	2220	TKO.DMSO.vs.J1.DMSO	-0.136347	2.57831	0.270001	0.603331	0.768375	FALSE	NoSigChange
Bcl2l15	chr3	103832696	103854618	+	2093	TKO.DMSO.vs.J1.DMSO	2.06837	0.658875	14.4796	0.000141683	0.00120352	FALSE	NoSigChange
Bcl2l2	chr14	54883425	54888234	+	3461	TKO.DMSO.vs.J1.DMSO	-0.477609	4.18589	6.39847	0.0114219	0.0461666	FALSE	NoSigChange
Bcl3	chr7	19808462	19822755	-	1835	TKO.DMSO.vs.J1.DMSO	0.313637	3.23753	2.61406	0.10592	0.246005	FALSE	NoSigChange
Bcl6	chr16	23965052	23988612	-	3285	TKO.DMSO.vs.J1.DMSO	-0.310709	2.11574	0.846233	0.35762	0.559701	FALSE	NoSigChange
Bcl6b	chr11	70224127	70229798	-	3426	TKO.DMSO.vs.J1.DMSO	-0.710776	4.56163	20.131	7.23136e-06	9.26851e-05	FALSE	NoSigChange
Bcl7a	chr5	123344448	123374083	+	3809	TKO.DMSO.vs.J1.DMSO	-0.312951	3.49108	2.95248	0.0857458	0.212242	FALSE	NoSigChange
Bcl7b	chr5	135168372	135181852	+	1666	TKO.DMSO.vs.J1.DMSO	-0.128666	3.87138	0.444962	0.504737	0.692484	FALSE	NoSigChange
Bcl7c	chr7	127704978	127708766	-	965	TKO.DMSO.vs.J1.DMSO	-0.378961	3.19382	4.04128	0.0444002	0.131644	FALSE	NoSigChange
Bcl9	chr3	97203662	97227364	-	6102	TKO.DMSO.vs.J1.DMSO	-0.620843	2.93189	6.247	0.0124404	0.0493659	FALSE	NoSigChange
Bcl9l	chr9	44499136	44510412	+	5328	TKO.DMSO.vs.J1.DMSO	-0.00954593	4.25467	0.00145558	0.969566	0.98591	FALSE	NoSigChange
Bclaf1	chr10	20312469	20342501	+	5454	TKO.DMSO.vs.J1.DMSO	0.0433991	9.45499	0.131445	0.716939	0.844025	FALSE	NoSigChange
Bco2	chr9	50533087	50555138	-	2075	TKO.DMSO.vs.J1.DMSO	0.34732	-0.154797	0.248945	0.617819	0.77903	FALSE	NoSigChange
Bcor	chrX	12036738	12160355	-	7010	TKO.DMSO.vs.J1.DMSO	0.717363	6.48777	31.2362	2.28471e-08	5.35045e-07	TRUE	SigIncrease
Bcorl1	chrX	48341358	48406728	+	6125	TKO.DMSO.vs.J1.DMSO	0.277994	3.77849	1.22392	0.268593	0.467045	FALSE	NoSigChange
Bcr	chr10	75060896	75184923	+	6537	TKO.DMSO.vs.J1.DMSO	0.498563	5.2641	9.47747	0.0020801	0.0117359	FALSE	NoSigChange
Bcs1l	chr1	74588361	74592443	+	1829	TKO.DMSO.vs.J1.DMSO	-0.314533	5.03534	3.93329	0.0473392	0.137702	FALSE	NoSigChange
Bdh1	chr16	31422297	31458901	+	3333	TKO.DMSO.vs.J1.DMSO	-0.102451	4.2972	0.181729	0.669892	0.81466	FALSE	NoSigChange
Bdh2	chr3	135281221	135304425	+	1171	TKO.DMSO.vs.J1.DMSO	-1.50329	3.12479	24.9297	5.94583e-07	1.01466e-05	FALSE	NoSigChange
Bdkrb2	chr12	105563172	105593071	+	1680	TKO.DMSO.vs.J1.DMSO	-0.358554	1.09901	1.13181	0.287389	0.487914	FALSE	NoSigChange
Bdnf	chr2	109674700	109727043	+	5487	TKO.DMSO.vs.J1.DMSO	-0.744532	2.73887	8.82699	0.00296808	0.0157532	FALSE	NoSigChange
Bdp1	chr13	100017994	100104070	-	9921	TKO.DMSO.vs.J1.DMSO	-0.100695	7.26009	0.843896	0.358285	0.560319	FALSE	NoSigChange
Becn1	chr11	101288267	101302267	-	2031	TKO.DMSO.vs.J1.DMSO	0.100178	6.61179	0.783206	0.376162	0.576631	FALSE	NoSigChange
Begain	chr12	109032182	109068217	-	2712	TKO.DMSO.vs.J1.DMSO	0.441166	0.0335587	1.05591	0.304151	0.504443	FALSE	NoSigChange
Bend3	chr10	43479140	43515417	+	6049	TKO.DMSO.vs.J1.DMSO	0.176321	6.53945	1.9068	0.167319	0.338103	FALSE	NoSigChange
Bend4	chr5	67392147	67427799	-	7935	TKO.DMSO.vs.J1.DMSO	-0.0742091	7.31597	0.53796	0.463279	0.657986	FALSE	NoSigChange
Bend5	chr4	111415006	111460298	+	1908	TKO.DMSO.vs.J1.DMSO	0.520522	2.67222	5.22517	0.0222623	0.0779943	FALSE	NoSigChange
Bend6	chr1	33852052	33907621	-	2292	TKO.DMSO.vs.J1.DMSO	-0.393922	1.967	1.18051	0.277253	0.476902	FALSE	NoSigChange
Bend7	chr2	4717831	4802146	+	3837	TKO.DMSO.vs.J1.DMSO	0.262592	2.53292	0.765703	0.38155	0.581252	FALSE	NoSigChange
Best1	chr19	9985172	10001633	-	2082	TKO.DMSO.vs.J1.DMSO	0.945049	1.75416	6.49843	0.010797	0.0440621	FALSE	NoSigChange
Best2	chr8	85007203	85014531	-	2211	TKO.DMSO.vs.J1.DMSO	0.411872	1.48403	1.14284	0.285052	0.485517	FALSE	NoSigChange
Bet1	chr6	4076904	4086927	-	1466	TKO.DMSO.vs.J1.DMSO	0.0923362	5.01466	0.369776	0.543126	0.724724	FALSE	NoSigChange
Bet1l	chr7	140853384	140856383	-	1552	TKO.DMSO.vs.J1.DMSO	-0.010476	4.51118	0.00435037	0.947412	0.974355	FALSE	NoSigChange
Bex1	chrX	136213972	136215513	-	866	TKO.DMSO.vs.J1.DMSO	-0.517374	7.54569	11.301	0.000774653	0.00509144	FALSE	NoSigChange
Bex2	chrX	136066565	136068236	-	902	TKO.DMSO.vs.J1.DMSO	-0.253242	5.36256	3.92161	0.0476691	0.138292	FALSE	NoSigChange
Bex4	chrX	136139045	136140437	+	782	TKO.DMSO.vs.J1.DMSO	-0.282898	4.94527	3.30794	0.068946	0.181387	FALSE	NoSigChange
Bex6	chr16	32179800	32186944	+	983	TKO.DMSO.vs.J1.DMSO	0.595345	2.26004	0.333414	0.563656	0.74061	FALSE	NoSigChange
Bfar	chr16	13671858	13703612	+	3003	TKO.DMSO.vs.J1.DMSO	0.231747	5.80869	3.49055	0.06172	0.167095	FALSE	NoSigChange
Bfsp1	chr2	143826528	143863173	-	2372	TKO.DMSO.vs.J1.DMSO	2.27355	2.10589	58.7651	1.77668e-14	1.2697e-12	TRUE	SigIncrease
Bfsp2	chr9	103424924	103480328	-	1570	TKO.DMSO.vs.J1.DMSO	0.652844	1.65435	0.444173	0.505115	0.692726	FALSE	NoSigChange
Bgn	chrX	73483635	73495936	+	2389	TKO.DMSO.vs.J1.DMSO	-1.03088	1.23336	3.95225	0.0468087	0.136716	FALSE	NoSigChange
Bhlha15	chr5	144190286	144194441	+	3494	TKO.DMSO.vs.J1.DMSO	0.819509	2.13645	9.43883	0.00212439	0.0119591	FALSE	NoSigChange
Bhlhb9	chrX	135885851	135891081	+	2825	TKO.DMSO.vs.J1.DMSO	0.0783692	6.00272	0.388491	0.533094	0.716124	FALSE	NoSigChange
Bhlhe22	chr3	18054325	18057514	+	3190	TKO.DMSO.vs.J1.DMSO	-0.27034	1.02567	0.357384	0.549963	0.72959	FALSE	NoSigChange
Bhlhe23	chr2	180774381	180776900	-	2520	TKO.DMSO.vs.J1.DMSO	1.38237	1.48304	7.26447	0.00703321	0.0313865	FALSE	NoSigChange
Bhlhe40	chr6	108660629	108666925	+	3113	TKO.DMSO.vs.J1.DMSO	-1.10256	4.57602	27.8289	1.32531e-07	2.61998e-06	TRUE	SigDecrease
Bhlhe41	chr6	145858243	145865420	-	6124	TKO.DMSO.vs.J1.DMSO	-0.676515	1.3493	2.1286	0.144573	0.305355	FALSE	NoSigChange
Bhmt	chr13	93616891	93637758	-	2071	TKO.DMSO.vs.J1.DMSO	1.7439	-0.00619046	9.48229	0.00207465	0.0117181	FALSE	NoSigChange
Bhmt2	chr13	93656097	93674302	-	2090	TKO.DMSO.vs.J1.DMSO	-0.151516	1.19765	0.11335	0.736362	0.856653	FALSE	NoSigChange
Bicc1	chr10	70925096	71159634	-	3101	TKO.DMSO.vs.J1.DMSO	0.437331	2.10503	1.84486	0.174382	0.348307	FALSE	NoSigChange
Bicd1	chr6	149408886	149558857	+	5293	TKO.DMSO.vs.J1.DMSO	-0.271824	4.7437	3.52324	0.0605139	0.164637	FALSE	NoSigChange
Bicd2	chr13	49341549	49387025	+	6351	TKO.DMSO.vs.J1.DMSO	0.0350654	5.98541	0.078035	0.779978	0.881297	FALSE	NoSigChange
Bid	chr6	120893119	120916820	-	1891	TKO.DMSO.vs.J1.DMSO	-0.265791	5.87799	3.66703	0.0554989	0.154868	FALSE	NoSigChange
Bik	chr15	83526862	83544635	+	943	TKO.DMSO.vs.J1.DMSO	-0.1086	2.26567	0.128657	0.719829	0.845447	FALSE	NoSigChange
Bin1	chr18	32377217	32435740	+	2455	TKO.DMSO.vs.J1.DMSO	-0.947206	4.8248	24.4761	7.52362e-07	1.25713e-05	FALSE	NoSigChange
Bin2	chr15	100641082	100669500	-	1978	TKO.DMSO.vs.J1.DMSO	0.428607	4.28105	1.60373	0.205375	0.389706	FALSE	NoSigChange
Bin3	chr14	70100145	70138206	+	1727	TKO.DMSO.vs.J1.DMSO	-0.460312	4.45274	5.13114	0.0235003	0.0812635	FALSE	NoSigChange
Birc2	chr9	7818226	7835255	-	3140	TKO.DMSO.vs.J1.DMSO	-0.169128	6.62759	2.01956	0.155284	0.321552	FALSE	NoSigChange
Birc3	chr9	7848701	7873170	-	2811	TKO.DMSO.vs.J1.DMSO	0.0216929	2.64119	0.00857024	0.926241	0.962865	FALSE	NoSigChange
Birc5	chr11	117849237	117855743	+	3416	TKO.DMSO.vs.J1.DMSO	0.191275	7.25628	3.45011	0.0632477	0.170128	FALSE	NoSigChange
Birc6	chr17	74528295	74703356	+	15768	TKO.DMSO.vs.J1.DMSO	-0.0275761	9.37782	0.0543753	0.815618	0.904117	FALSE	NoSigChange
Birc7	chr2	180929023	180934010	+	1178	TKO.DMSO.vs.J1.DMSO	1.4327	0.426074	11.6141	0.00065454	0.00443015	FALSE	NoSigChange
Bivm	chr1	44119968	44144771	+	3571	TKO.DMSO.vs.J1.DMSO	-0.622153	5.17844	19.5534	9.78258e-06	0.000120869	FALSE	NoSigChange
Blcap	chr2	157556362	157566361	-	2080	TKO.DMSO.vs.J1.DMSO	-0.324586	5.02587	4.47171	0.0344605	0.108672	FALSE	NoSigChange
Blm	chr7	80454993	80535119	-	4946	TKO.DMSO.vs.J1.DMSO	0.145992	7.2037	1.51177	0.218869	0.40709	FALSE	NoSigChange
Blmh	chr11	76945656	76987389	+	2355	TKO.DMSO.vs.J1.DMSO	-0.159254	8.29898	2.31625	0.128028	0.281501	FALSE	NoSigChange
Blnk	chr19	40928927	40994535	-	2097	TKO.DMSO.vs.J1.DMSO	0.438219	1.69794	1.81458	0.17796	0.353459	FALSE	NoSigChange
Bloc1s1	chr10	128919914	128923524	-	550	TKO.DMSO.vs.J1.DMSO	0.0929492	3.58716	0.244649	0.620868	0.781192	FALSE	NoSigChange
Bloc1s2a	chr19	44139247	44146446	-	897	TKO.DMSO.vs.J1.DMSO	0.139532	4.01886	0.571823	0.449535	0.645026	FALSE	NoSigChange
Bloc1s3	chr7	19505804	19508331	-	1834	TKO.DMSO.vs.J1.DMSO	0.0870799	3.90434	0.264865	0.606797	0.771329	FALSE	NoSigChange
Bloc1s4	chr5	36747374	36748679	-	1306	TKO.DMSO.vs.J1.DMSO	0.151905	4.20138	1.03998	0.307827	0.50805	FALSE	NoSigChange
Bloc1s5	chr13	38602706	38635109	-	1769	TKO.DMSO.vs.J1.DMSO	0.0145187	3.91674	0.00691046	0.933749	0.966775	FALSE	NoSigChange
Bloc1s6	chr2	122738505	122749487	+	3494	TKO.DMSO.vs.J1.DMSO	-0.147915	5.44104	1.41091	0.234906	0.426343	FALSE	NoSigChange
Blvra	chr2	127070657	127097084	+	1170	TKO.DMSO.vs.J1.DMSO	-0.0241279	4.05354	0.0132451	0.908376	0.954331	FALSE	NoSigChange
Blvrb	chr7	27447978	27465981	+	865	TKO.DMSO.vs.J1.DMSO	0.143605	4.35491	0.686209	0.407457	0.606286	FALSE	NoSigChange
Blzf1	chr1	164289800	164307484	-	4035	TKO.DMSO.vs.J1.DMSO	0.105343	5.45747	0.583865	0.444801	0.640322	FALSE	NoSigChange
Bmf	chr2	118528757	118549678	-	4633	TKO.DMSO.vs.J1.DMSO	0.655076	5.31053	22.9836	1.63389e-06	2.45519e-05	FALSE	NoSigChange
Bmi1	chr2	18677018	18686629	+	3594	TKO.DMSO.vs.J1.DMSO	1.00982	4.45919	23.797	1.07048e-06	1.69915e-05	FALSE	NoSigChange
Bmp1	chr14	70474555	70520260	-	4454	TKO.DMSO.vs.J1.DMSO	-2.66293	5.16557	101.213	8.26125e-24	1.61222e-21	TRUE	SigDecrease
Bmp2	chr2	133553199	133562885	+	2515	TKO.DMSO.vs.J1.DMSO	-0.971306	0.15568	2.89358	0.0889333	0.217959	FALSE	NoSigChange
Bmp2k	chr5	96997689	97091048	+	6568	TKO.DMSO.vs.J1.DMSO	-0.420492	3.99022	4.83442	0.027897	0.0927511	FALSE	NoSigChange
Bmp4	chr14	46383520	46390599	-	1994	TKO.DMSO.vs.J1.DMSO	-0.149513	4.80743	0.865076	0.352322	0.554607	FALSE	NoSigChange
Bmp6	chr13	38345716	38499728	+	2410	TKO.DMSO.vs.J1.DMSO	0.180494	2.05383	0.287798	0.591635	0.759925	FALSE	NoSigChange
Bmp7	chr2	172869687	172940293	-	1967	TKO.DMSO.vs.J1.DMSO	-0.264684	2.23708	0.67787	0.410321	0.609321	FALSE	NoSigChange
Bmp8a	chr4	123312650	123343252	-	2400	TKO.DMSO.vs.J1.DMSO	0.400035	2.07424	0.83729	0.360173	0.561983	FALSE	NoSigChange
Bmp8b	chr4	123105165	123126091	+	2940	TKO.DMSO.vs.J1.DMSO	-1.87445	3.69073	34.8006	3.65253e-09	1.05501e-07	TRUE	SigDecrease
Bmper	chr9	23223076	23485202	+	3793	TKO.DMSO.vs.J1.DMSO	2.35935	1.63949	20.5672	5.75744e-06	7.61423e-05	FALSE	NoSigChange
Bmpr1a	chr14	34411068	34502546	-	5481	TKO.DMSO.vs.J1.DMSO	-0.109923	7.66693	1.06939	0.301084	0.50136	FALSE	NoSigChange
Bmpr1b	chr3	141837136	141982251	-	5336	TKO.DMSO.vs.J1.DMSO	-0.173538	3.02459	0.535997	0.464096	0.658692	FALSE	NoSigChange
Bmpr2	chr1	59764637	59870859	+	3507	TKO.DMSO.vs.J1.DMSO	0.0877049	5.00582	0.405044	0.524496	0.709173	FALSE	NoSigChange
Bms1	chr6	118383381	118419417	-	4288	TKO.DMSO.vs.J1.DMSO	0.0444267	8.07961	0.190726	0.662313	0.80966	FALSE	NoSigChange
Bmyc	chr2	25706879	25707719	+	841	TKO.DMSO.vs.J1.DMSO	0.00148876	2.4005	3.39513e-05	0.995351	0.997198	FALSE	NoSigChange
Bnc1	chr7	81966662	81992299	-	4663	TKO.DMSO.vs.J1.DMSO	-0.230568	0.937609	0.129833	0.718605	0.844801	FALSE	NoSigChange
Bnc2	chr4	84272542	84675086	-	6453	TKO.DMSO.vs.J1.DMSO	0.660034	4.91442	5.99569	0.0143409	0.055321	FALSE	NoSigChange
[truncated: 58,891 more rows]
